# Supplementary material for: Exploring Hepatocellular Carcinoma Etiology through Multi-omics Bioinformatics
Source: Research Square preprint supplement (doi:10.21203/rs.3.rs-6188338/v1), 2025-04-21
Supplement: Supplementary file 1 [file 0f1b116e00f5072c3a5756dc.xlsx]

## Sheet: Content
Content
S9.1. The casual effect estimated after meta-analysis of peripheral blood immune cells phenotypes to HCC.
S9.2. The casual effect estimated after meta-analysis of peripheral blood immune factors phenotypes to HCC.
S9.3. The casual effect estimated after meta-analysis of peripheral blood metabolites to HCC.
S9.4. The casual effect estimated after meta-analysis of gut microbiota phenotypes to HCC.

## Sheet: S9.1.
The casual effect estimated after meta-analysis of peripheral blood immune cells phenotypes to HCC.
id	Random_p-value	Random_OR	Random_95lci	Random_95uci	Q	df.Q	p-value.Q	I2
Hepatocellular-carcinoma:ebi-a-GCST90001744	0.00168021	0.702758	0.563939	0.875749	0.00240369	1	0.960897	0
Hepatocellular-carcinoma:ebi-a-GCST90001884	0.00581678	0.830304	0.727515	0.947616	0.122009	1	0.726866	0
Hepatocellular-carcinoma:ebi-a-GCST90001416	0.0118791	0.889906	0.812603	0.974562	0.0029163	1	0.956933	0
Hepatocellular-carcinoma:ebi-a-GCST90001620	0.0178329	1.14125	1.02308	1.27308	0.00286559	1	0.957309	0
Hepatocellular-carcinoma:ebi-a-GCST90001680	0.0188822	0.773073	0.623603	0.95837	0.0616243	1	0.803947	0
Hepatocellular-carcinoma:ebi-a-GCST90001853	0.0217495	0.855494	0.748725	0.977489	0.639558	1	0.423871	0
Hepatocellular-carcinoma:ebi-a-GCST90001422	0.0218548	1.22814	1.03029	1.464	0.217663	1	0.640826	0
Hepatocellular-carcinoma:ebi-a-GCST90001770	0.0236128	1.70996	1.07456	2.72106	0.484178	1	0.486536	0
Hepatocellular-carcinoma:ebi-a-GCST90001809	0.0237152	1.61791	1.0663	2.45488	0.814917	1	0.366671	0
Hepatocellular-carcinoma:ebi-a-GCST90001444	0.0253632	1.22654	1.02551	1.46697	0.00014148	1	0.99051	0
Hepatocellular-carcinoma:ebi-a-GCST90001596	0.0257884	0.820523	0.689546	0.976378	1.12899	1	0.28799	0.114255
Hepatocellular-carcinoma:ebi-a-GCST90002025	0.0262152	0.814949	0.680419	0.976077	0.00547271	1	0.941028	0
Hepatocellular-carcinoma:ebi-a-GCST90001415	0.0265066	1.32418	1.03329	1.69696	0.0178331	1	0.893766	0
Hepatocellular-carcinoma:ebi-a-GCST90001701	0.026676	0.784632	0.633158	0.972345	0.634939	1	0.425549	0
Hepatocellular-carcinoma:ebi-a-GCST90001527	0.0274229	0.86453	0.75962	0.983928	0.593781	1	0.440961	0
Hepatocellular-carcinoma:ebi-a-GCST90001409	0.0279113	0.78891	0.638599	0.9746	0.278125	1	0.597933	0
Hepatocellular-carcinoma:ebi-a-GCST90001927	0.0293204	1.2655	1.02397	1.564	0.00967935	1	0.921628	0
Hepatocellular-carcinoma:ebi-a-GCST90001421	0.0305909	1.15038	1.0132	1.30614	0.960493	1	0.327063	0
Hepatocellular-carcinoma:ebi-a-GCST90001617	0.0368857	0.887057	0.792633	0.99273	0.0394837	1	0.842493	0
Hepatocellular-carcinoma:ebi-a-GCST90001734	0.0382783	0.786853	0.627205	0.987137	0.0756414	1	0.783293	0
Hepatocellular-carcinoma:ebi-a-GCST90002001	0.0383296	1.27712	1.01324	1.60972	0.307437	1	0.579257	0
Hepatocellular-carcinoma:ebi-a-GCST90001740	0.0392873	1.28552	1.01241	1.6323	0.173907	1	0.676663	0
Hepatocellular-carcinoma:ebi-a-GCST90001814	0.0404149	0.931392	0.870187	0.9969	1.16395	1	0.280648	0.140857
Hepatocellular-carcinoma:ebi-a-GCST90001457	0.0443253	0.775173	0.60479	0.993558	1.56028	1	0.211624	0.359091
Hepatocellular-carcinoma:ebi-a-GCST90001437	0.0443645	0.743743	0.557295	0.992567	0.765546	1	0.381598	0
Hepatocellular-carcinoma:ebi-a-GCST90001691	0.0461779	1.06833	1.00112	1.14005	0.892818	1	0.344715	0
Hepatocellular-carcinoma:ebi-a-GCST90001933	0.0507718	1.14431	0.999547	1.31003	0.366637	1	0.544843	0
Hepatocellular-carcinoma:ebi-a-GCST90001800	0.0513878	0.88045	0.774597	1.00077	0.000226885	1	0.987982	0
Hepatocellular-carcinoma:ebi-a-GCST90001485	0.0516774	0.932754	0.869589	1.00051	0.30226	1	0.582469	0
Hepatocellular-carcinoma:ebi-a-GCST90001571	0.0521248	0.828524	0.685265	1.00173	0.133154	1	0.715184	0
Hepatocellular-carcinoma:ebi-a-GCST90001411	0.0524395	0.640576	0.408415	1.00471	1.48895	1	0.222379	0.328388
Hepatocellular-carcinoma:ebi-a-GCST90001491	0.0540503	0.91522	0.836336	1.00154	0.072686	1	0.787465	0
Hepatocellular-carcinoma:ebi-a-GCST90001696	0.0549174	1.00258	0.999946	1.00522	0.246376	1	0.619639	0
Hepatocellular-carcinoma:ebi-a-GCST90002113	0.0569807	0.771656	0.590889	1.00772	0.346076	1	0.556343	0
Hepatocellular-carcinoma:ebi-a-GCST90001677	0.0588371	1.30056	0.990235	1.70813	0.00619018	1	0.937289	0
Hepatocellular-carcinoma:ebi-a-GCST90002029	0.0619481	1.23374	0.989557	1.53817	0.287305	1	0.591953	0
Hepatocellular-carcinoma:ebi-a-GCST90001484	0.0620366	0.914344	0.832265	1.00452	0.000456205	1	0.982959	0
Hepatocellular-carcinoma:ebi-a-GCST90002005	0.0633603	1.14168	0.992655	1.31307	0.609199	1	0.43509	0
Hepatocellular-carcinoma:ebi-a-GCST90001768	0.0637426	0.855225	0.724899	1.00898	0.369546	1	0.543252	0
Hepatocellular-carcinoma:ebi-a-GCST90001412	0.0641289	1.24974	0.986998	1.58243	0.0499803	1	0.823098	0
Hepatocellular-carcinoma:ebi-a-GCST90001906	0.0644596	0.801044	0.633184	1.0134	0.308456	1	0.578629	0
Hepatocellular-carcinoma:ebi-a-GCST90001857	0.0706426	0.887375	0.779553	1.01011	0.0317281	1	0.858626	0
Hepatocellular-carcinoma:ebi-a-GCST90001968	0.0770335	0.773031	0.58112	1.02832	0.0220702	1	0.8819	0
Hepatocellular-carcinoma:ebi-a-GCST90001466	0.0779381	0.828983	0.672945	1.0212	0.483134	1	0.487006	0
Hepatocellular-carcinoma:ebi-a-GCST90001849	0.0800339	0.858408	0.723524	1.01844	0.0582834	1	0.80923	0
Hepatocellular-carcinoma:ebi-a-GCST90001455	0.0808157	1.42335	0.957656	2.1155	0.0107157	1	0.917553	0
Hepatocellular-carcinoma:ebi-a-GCST90001896	0.0831586	0.82489	0.663473	1.02558	0.170811	1	0.679392	0
Hepatocellular-carcinoma:ebi-a-GCST90001682	0.0835399	1.35192	0.960807	1.90225	0.366344	1	0.545004	0
Hepatocellular-carcinoma:ebi-a-GCST90001616	0.0864007	0.898416	0.794877	1.01544	0.0687593	1	0.793152	0
Hepatocellular-carcinoma:ebi-a-GCST90002088	0.0869522	1.19943	0.97397	1.47707	1.44953	1	0.228603	0.310123
Hepatocellular-carcinoma:ebi-a-GCST90001797	0.0876406	1.16993	0.977112	1.40079	0.0340403	1	0.853621	0
Hepatocellular-carcinoma:ebi-a-GCST90001551	0.0915464	1.16361	0.975811	1.38755	0.642685	1	0.42274	0
Hepatocellular-carcinoma:ebi-a-GCST90002026	0.0937405	0.866559	0.73292	1.02456	0.282202	1	0.595261	0
Hepatocellular-carcinoma:ebi-a-GCST90001443	0.0967552	1.1089	0.981551	1.25278	0.196859	1	0.657268	0
Hepatocellular-carcinoma:ebi-a-GCST90002085	0.0969688	0.855155	0.710882	1.02871	0.37511	1	0.540232	0
Hepatocellular-carcinoma:ebi-a-GCST90001891	0.101132	0.817685	0.642805	1.04014	0.00270631	1	0.958511	0
Hepatocellular-carcinoma:ebi-a-GCST90001604	0.103789	0.782582	0.58244	1.0515	0.598022	1	0.439334	0
Hepatocellular-carcinoma:ebi-a-GCST90001467	0.107231	0.846472	0.691087	1.0368	0.131939	1	0.71643	0
Hepatocellular-carcinoma:ebi-a-GCST90001786	0.10846	1.38712	0.930222	2.06844	2.65422	1	0.103276	0.623241
Hepatocellular-carcinoma:ebi-a-GCST90001965	0.109578	0.917991	0.826645	1.01943	0.253187	1	0.61484	0
Hepatocellular-carcinoma:ebi-a-GCST90001509	0.110793	0.925218	0.84092	1.01797	0.0269642	1	0.869568	0
Hepatocellular-carcinoma:ebi-a-GCST90001791	0.115103	1.1619	0.964063	1.40034	1.06535	1	0.301999	0.0613392
Hepatocellular-carcinoma:ebi-a-GCST90001787	0.115436	0.910748	0.810677	1.02317	0.067237	1	0.795403	0
Hepatocellular-carcinoma:ebi-a-GCST90001922	0.115684	0.790557	0.589888	1.05949	0.000253084	1	0.987307	0
Hepatocellular-carcinoma:ebi-a-GCST90001801	0.116337	0.915158	0.819292	1.02224	0.147163	1	0.701262	0
Hepatocellular-carcinoma:ebi-a-GCST90001548	0.121196	1.20162	0.952548	1.51583	0.275823	1	0.599452	0
Hepatocellular-carcinoma:ebi-a-GCST90001465	0.122421	0.903325	0.793994	1.02771	0.214539	1	0.643233	0
Hepatocellular-carcinoma:ebi-a-GCST90001429	0.128688	1.15031	0.960198	1.37806	0.803394	1	0.370081	0
Hepatocellular-carcinoma:ebi-a-GCST90001447	0.13021	1.16419	0.956117	1.41755	0.0377643	1	0.845917	0
Hepatocellular-carcinoma:ebi-a-GCST90001634	0.135138	0.870959	0.726588	1.04401	0.432005	1	0.511007	0
Hepatocellular-carcinoma:ebi-a-GCST90001487	0.136292	1.11246	0.966921	1.2799	0.17642	1	0.674468	0
Hepatocellular-carcinoma:ebi-a-GCST90001911	0.137848	0.894455	0.771922	1.03644	0.0291679	1	0.864392	0
Hepatocellular-carcinoma:ebi-a-GCST90001470	0.138057	1.17874	0.948495	1.46487	0.000121768	1	0.991196	0
Hepatocellular-carcinoma:ebi-a-GCST90001855	0.138734	0.896146	0.775062	1.03615	0.93519	1	0.333518	0
Hepatocellular-carcinoma:ebi-a-GCST90001448	0.145308	1.18499	0.942988	1.4891	0.071673	1	0.788916	0
Hepatocellular-carcinoma:ebi-a-GCST90001570	0.151335	1.11791	0.960029	1.30174	0.132087	1	0.716278	0
Hepatocellular-carcinoma:ebi-a-GCST90001553	0.152544	1.11737	0.959767	1.30086	0.200446	1	0.654361	0
Hepatocellular-carcinoma:ebi-a-GCST90001684	0.152929	1.26257	0.917069	1.73825	0.0783055	1	0.779607	0
Hepatocellular-carcinoma:ebi-a-GCST90001521	0.153238	0.911743	0.803162	1.035	0.205696	1	0.650162	0
Hepatocellular-carcinoma:ebi-a-GCST90001615	0.158742	0.863787	0.704638	1.05888	0.0951499	1	0.757729	0
Hepatocellular-carcinoma:ebi-a-GCST90001888	0.163786	0.883941	0.743038	1.05156	0.469471	1	0.493231	0
Hepatocellular-carcinoma:ebi-a-GCST90002063	0.165264	0.911206	0.799051	1.0391	0.0352705	1	0.85103	0
Hepatocellular-carcinoma:ebi-a-GCST90001735	0.170786	1.19582	0.925824	1.54456	0.845605	1	0.357799	0
Hepatocellular-carcinoma:ebi-a-GCST90001546	0.17142	0.81703	0.611601	1.09146	0.557293	1	0.455353	0
Hepatocellular-carcinoma:ebi-a-GCST90001400	0.171873	0.924531	0.8261	1.03469	0.939574	1	0.332387	0
Hepatocellular-carcinoma:ebi-a-GCST90001864	0.173493	0.913683	0.802307	1.04052	0.0184262	1	0.892024	0
Hepatocellular-carcinoma:ebi-a-GCST90001964	0.174145	1.11307	0.953735	1.29903	0.520895	1	0.47046	0
Hepatocellular-carcinoma:ebi-a-GCST90001614	0.17486	0.792792	0.566872	1.10875	0.201365	1	0.653621	0
Hepatocellular-carcinoma:ebi-a-GCST90001431	0.17663	0.855955	0.683076	1.07259	0.286997	1	0.592151	0
Hepatocellular-carcinoma:ebi-a-GCST90001697	0.177348	1.00152	0.999311	1.00374	0.0259888	1	0.871928	0
Hepatocellular-carcinoma:ebi-a-GCST90001453	0.178409	0.84395	0.65917	1.08053	0.801941	1	0.370514	0
Hepatocellular-carcinoma:ebi-a-GCST90001407	0.179041	1.07538	0.967219	1.19564	0.176579	1	0.67433	0
Hepatocellular-carcinoma:ebi-a-GCST90001772	0.180064	0.921716	0.818157	1.03838	1.01953	1	0.31263	0.0191587
Hepatocellular-carcinoma:ebi-a-GCST90002020	0.185389	1.16562	0.929087	1.46237	0.000792045	1	0.977548	0
Hepatocellular-carcinoma:ebi-a-GCST90001394	0.189707	0.932039	0.838982	1.03542	0.000273438	1	0.986807	0
Hepatocellular-carcinoma:ebi-a-GCST90001998	0.191031	1.08237	0.961273	1.21873	0.36336	1	0.546646	0
Hepatocellular-carcinoma:ebi-a-GCST90002053	0.192248	1.10399	0.951447	1.28099	0.0703686	1	0.790801	0
Hepatocellular-carcinoma:ebi-a-GCST90001549	0.192834	1.15113	0.931382	1.42272	0.0593722	1	0.807491	0
Hepatocellular-carcinoma:ebi-a-GCST90002082	0.193717	0.909522	0.788317	1.04936	0.90827	1	0.340574	0
Hepatocellular-carcinoma:ebi-a-GCST90002093	0.19654	0.79622	0.563429	1.12519	1.29988	1	0.254234	0.230701
Hepatocellular-carcinoma:ebi-a-GCST90001879	0.196551	1.11634	0.944621	1.31928	0.17388	1	0.676687	0
Hepatocellular-carcinoma:ebi-a-GCST90001942	0.197655	0.93095	0.834932	1.03801	0.224773	1	0.635427	0
Hepatocellular-carcinoma:ebi-a-GCST90001935	0.201041	0.829089	0.622049	1.10504	0.389572	1	0.532524	0
Hepatocellular-carcinoma:ebi-a-GCST90001575	0.201528	0.886275	0.736392	1.06667	0.661894	1	0.415892	0
Hepatocellular-carcinoma:ebi-a-GCST90002045	0.201837	0.88171	0.726719	1.06976	0.0562587	1	0.81251	0
Hepatocellular-carcinoma:ebi-a-GCST90002043	0.203452	0.905036	0.776038	1.05548	0.281088	1	0.595989	0
Hepatocellular-carcinoma:ebi-a-GCST90001588	0.203885	1.13884	0.931889	1.39174	0.583699	1	0.444866	0
Hepatocellular-carcinoma:ebi-a-GCST90001661	0.204498	1.11604	0.941955	1.32229	0.0257752	1	0.872451	0
Hepatocellular-carcinoma:ebi-a-GCST90001430	0.205838	0.934885	0.842277	1.03768	0.0110161	1	0.91641	0
Hepatocellular-carcinoma:ebi-a-GCST90001843	0.207489	0.918768	0.805368	1.04814	0.00347833	1	0.95297	0
Hepatocellular-carcinoma:ebi-a-GCST90001623	0.212996	0.880503	0.72069	1.07576	0.946354	1	0.330649	0
Hepatocellular-carcinoma:ebi-a-GCST90002054	0.217179	0.812273	0.583833	1.1301	1.32088	1	0.250434	0.24293
Hepatocellular-carcinoma:ebi-a-GCST90001754	0.218788	1.14072	0.924801	1.40705	0.0417428	1	0.838111	0
Hepatocellular-carcinoma:ebi-a-GCST90001679	0.223304	0.804317	0.566524	1.14192	2.53586	1	0.111286	0.605657
Hepatocellular-carcinoma:ebi-a-GCST90001810	0.224322	1.10267	0.941849	1.29095	0.728734	1	0.393294	0
Hepatocellular-carcinoma:ebi-a-GCST90002031	0.226791	0.953044	0.881542	1.03035	0.498329	1	0.480235	0
Hepatocellular-carcinoma:ebi-a-GCST90001539	0.227628	1.1755	0.90395	1.52863	0.090862	1	0.763084	0
Hepatocellular-carcinoma:ebi-a-GCST90001580	0.22849	0.893334	0.74351	1.07335	0.218266	1	0.640364	0
Hepatocellular-carcinoma:ebi-a-GCST90001837	0.228652	1.15563	0.913152	1.4625	1.73484	1	0.187794	0.423577
Hepatocellular-carcinoma:ebi-a-GCST90002119	0.229224	1.09519	0.944318	1.27016	0.675699	1	0.411072	0
Hepatocellular-carcinoma:ebi-a-GCST90001745	0.231758	0.884719	0.723802	1.08141	0.139532	1	0.708746	0
Hepatocellular-carcinoma:ebi-a-GCST90001665	0.232737	0.887082	0.728614	1.08001	3.17762	1	0.0746536	0.685299
Hepatocellular-carcinoma:ebi-a-GCST90002010	0.235028	1.08662	0.947396	1.2463	0.373117	1	0.54131	0
Hepatocellular-carcinoma:ebi-a-GCST90002014	0.235275	1.12228	0.927614	1.35779	0.545242	1	0.460268	0
Hepatocellular-carcinoma:ebi-a-GCST90001893	0.23874	0.852058	0.652826	1.11209	0.237234	1	0.626211	0
Hepatocellular-carcinoma:ebi-a-GCST90001550	0.242266	1.22625	0.871183	1.72603	1.33186	1	0.248474	0.249172
Hepatocellular-carcinoma:ebi-a-GCST90001972	0.242935	1.07899	0.949727	1.22584	0.258136	1	0.611404	0
Hepatocellular-carcinoma:ebi-a-GCST90001990	0.244053	0.817744	0.582904	1.1472	1.87236	1	0.171206	0.465913
Hepatocellular-carcinoma:ebi-a-GCST90001599	0.244526	0.832562	0.611481	1.13357	0.112372	1	0.73746	0
Hepatocellular-carcinoma:ebi-a-GCST90001824	0.246804	1.15725	0.90383	1.48173	1.36975	1	0.241854	0.269941
Hepatocellular-carcinoma:ebi-a-GCST90002081	0.248621	0.848581	0.642029	1.12158	0.112497	1	0.737319	0
Hepatocellular-carcinoma:ebi-a-GCST90001515	0.249745	1.10347	0.933136	1.30489	0.455445	1	0.499761	0
Hepatocellular-carcinoma:ebi-a-GCST90001600	0.251648	0.76121	0.477428	1.21367	0.0659982	1	0.797255	0
Hepatocellular-carcinoma:ebi-a-GCST90002118	0.252662	0.814122	0.572355	1.15801	0.311534	1	0.57674	0
Hepatocellular-carcinoma:ebi-a-GCST90001418	0.252933	1.07232	0.951344	1.20868	2.36e-05	1	0.996128	0
Hepatocellular-carcinoma:ebi-a-GCST90002087	0.2532	1.11394	0.925716	1.34044	1.5982	1	0.206158	0.374297
Hepatocellular-carcinoma:ebi-a-GCST90001567	0.253286	0.881073	0.709042	1.09484	0.0294482	1	0.863748	0
Hepatocellular-carcinoma:ebi-a-GCST90001834	0.254568	1.16926	0.893479	1.53016	1.58292	1	0.208341	0.368255
Hepatocellular-carcinoma:ebi-a-GCST90001763	0.255882	1.13794	0.910566	1.42208	0.441254	1	0.506518	0
Hepatocellular-carcinoma:ebi-a-GCST90001540	0.256308	0.867648	0.679029	1.10866	0.0260866	1	0.871689	0
Hepatocellular-carcinoma:ebi-a-GCST90001439	0.256584	0.77541	0.499673	1.20331	1.06715	1	0.301591	0.0629224
Hepatocellular-carcinoma:ebi-a-GCST90001940	0.260454	0.900484	0.750218	1.08085	0.496411	1	0.481081	0
Hepatocellular-carcinoma:ebi-a-GCST90001836	0.262636	0.932024	0.824014	1.05419	0.710479	1	0.399285	0
Hepatocellular-carcinoma:ebi-a-GCST90002120	0.262948	1.17119	0.888124	1.54447	0.0525522	1	0.81868	0
Hepatocellular-carcinoma:ebi-a-GCST90001715	0.265103	0.934047	0.828429	1.05313	0.956653	1	0.328032	0
Hepatocellular-carcinoma:ebi-a-GCST90001635	0.266064	0.905261	0.75962	1.07882	0.0392801	1	0.842895	0
Hepatocellular-carcinoma:ebi-a-GCST90002008	0.270416	0.946645	0.858694	1.0436	0.860123	1	0.353704	0
Hepatocellular-carcinoma:ebi-a-GCST90001756	0.270867	0.889712	0.722621	1.09544	1.05009	1	0.305487	0.0477001
Hepatocellular-carcinoma:ebi-a-GCST90001833	0.274921	0.902916	0.751669	1.0846	1.07492	1	0.299837	0.069698
Hepatocellular-carcinoma:ebi-a-GCST90001574	0.276359	0.894104	0.730902	1.09375	0.00330808	1	0.954134	0
Hepatocellular-carcinoma:ebi-a-GCST90002024	0.276722	0.838833	0.611146	1.15135	1.73983	1	0.18716	0.425232
Hepatocellular-carcinoma:ebi-a-GCST90002090	0.277477	1.10296	0.924167	1.31634	0.00290373	1	0.957026	0
Hepatocellular-carcinoma:ebi-a-GCST90001704	0.277527	0.917082	0.784437	1.07216	1.59678	1	0.20636	0.373741
Hepatocellular-carcinoma:ebi-a-GCST90001823	0.28128	1.10208	0.923476	1.31522	0.0882961	1	0.766355	0
Hepatocellular-carcinoma:ebi-a-GCST90001469	0.282139	1.07475	0.942446	1.22562	0.551225	1	0.457817	0
Hepatocellular-carcinoma:ebi-a-GCST90001985	0.282421	1.03726	0.970326	1.10882	0.0442518	1	0.833386	0
Hepatocellular-carcinoma:ebi-a-GCST90001716	0.282442	0.902069	0.747516	1.08858	2.14973	1	0.142595	0.534826
Hepatocellular-carcinoma:ebi-a-GCST90001771	0.284528	1.07438	0.942098	1.22523	0.210019	1	0.646752	0
Hepatocellular-carcinoma:ebi-a-GCST90001647	0.28458	1.09738	0.925635	1.30099	1.36252	1	0.243102	0.266065
Hepatocellular-carcinoma:ebi-a-GCST90002072	0.285661	1.0923	0.928874	1.28448	0.182085	1	0.669587	0
Hepatocellular-carcinoma:ebi-a-GCST90001673	0.287834	1.09057	0.929439	1.27963	0.232375	1	0.629768	0
Hepatocellular-carcinoma:ebi-a-GCST90001961	0.288897	1.08222	0.935187	1.25237	0.229686	1	0.631756	0
Hepatocellular-carcinoma:ebi-a-GCST90001844	0.289987	1.09964	0.92224	1.31117	0.244258	1	0.621147	0
Hepatocellular-carcinoma:ebi-a-GCST90001761	0.292037	0.835327	0.597721	1.16739	1.87169	1	0.171282	0.465724
Hepatocellular-carcinoma:ebi-a-GCST90001472	0.29218	0.927787	0.80701	1.06664	0.147421	1	0.701012	0
Hepatocellular-carcinoma:ebi-a-GCST90001869	0.293038	1.0716	0.942003	1.21902	0.0877046	1	0.767116	0
Hepatocellular-carcinoma:ebi-a-GCST90001504	0.293121	1.12116	0.905881	1.3876	1.2435	1	0.264798	0.195817
Hepatocellular-carcinoma:ebi-a-GCST90001926	0.293572	0.907406	0.756932	1.08779	0.157022	1	0.691913	0
Hepatocellular-carcinoma:ebi-a-GCST90001564	0.296527	0.876346	0.683986	1.1228	0.221716	1	0.637736	0
Hepatocellular-carcinoma:ebi-a-GCST90001727	0.297761	1.04291	0.963608	1.12874	0.137754	1	0.710524	0
Hepatocellular-carcinoma:ebi-a-GCST90002032	0.298992	0.950581	0.863876	1.04599	0.422657	1	0.515614	0
Hepatocellular-carcinoma:ebi-a-GCST90001806	0.300907	0.926443	0.80159	1.07074	0.109932	1	0.740221	0
Hepatocellular-carcinoma:ebi-a-GCST90001769	0.301308	1.077	0.935683	1.23966	0.0663366	1	0.796747	0
Hepatocellular-carcinoma:ebi-a-GCST90001692	0.305136	1.03559	0.968631	1.10719	0.75067	1	0.386264	0
Hepatocellular-carcinoma:ebi-a-GCST90001446	0.305271	1.35416	0.758478	2.41768	0.784602	1	0.375737	0
Hepatocellular-carcinoma:ebi-a-GCST90001555	0.306472	1.03871	0.965785	1.11715	0.73186	1	0.392281	0
Hepatocellular-carcinoma:ebi-a-GCST90001759	0.307179	0.950736	0.862879	1.04754	0.347898	1	0.555305	0
Hepatocellular-carcinoma:ebi-a-GCST90001978	0.308882	1.05908	0.948227	1.1829	0.126177	1	0.722429	0
Hepatocellular-carcinoma:ebi-a-GCST90001831	0.312259	0.881365	0.68989	1.12598	0.165435	1	0.684201	0
Hepatocellular-carcinoma:ebi-a-GCST90001969	0.313724	1.08416	0.926441	1.26874	0.402981	1	0.525554	0
Hepatocellular-carcinoma:ebi-a-GCST90001434	0.314374	0.81089	0.539027	1.21987	2.37937	1	0.122947	0.579721
Hepatocellular-carcinoma:ebi-a-GCST90001608	0.314763	1.12436	0.894656	1.41305	0.846012	1	0.357683	0
Hepatocellular-carcinoma:ebi-a-GCST90001508	0.314814	0.95795	0.880974	1.04165	0.114863	1	0.734674	0
Hepatocellular-carcinoma:ebi-a-GCST90002101	0.314872	0.852572	0.624667	1.16363	0.0127283	1	0.910173	0
Hepatocellular-carcinoma:ebi-a-GCST90001561	0.315259	0.96123	0.88984	1.03835	0.727943	1	0.393551	0
Hepatocellular-carcinoma:ebi-a-GCST90001934	0.317743	0.928738	0.803357	1.07369	0.430622	1	0.511684	0
Hepatocellular-carcinoma:ebi-a-GCST90001708	0.319	0.94345	0.841388	1.05789	1.05253	1	0.304926	0.0499055
Hepatocellular-carcinoma:ebi-a-GCST90001454	0.321934	1.2166	0.825391	1.79322	0.145315	1	0.703054	0
Hepatocellular-carcinoma:ebi-a-GCST90001633	0.324026	0.886051	0.696691	1.12688	1.35115	1	0.245076	0.259892
Hepatocellular-carcinoma:ebi-a-GCST90001892	0.326127	0.934282	0.815741	1.07005	0.723692	1	0.394936	0
Hepatocellular-carcinoma:ebi-a-GCST90001562	0.326607	1.0309	0.970087	1.09552	0.27608	1	0.599282	0
Hepatocellular-carcinoma:ebi-a-GCST90001748	0.326703	1.10824	0.90248	1.36092	0.00567261	1	0.939963	0
Hepatocellular-carcinoma:ebi-a-GCST90001477	0.327894	1.06921	0.935059	1.22262	0.0173362	1	0.895248	0
Hepatocellular-carcinoma:ebi-a-GCST90001405	0.328559	0.930183	0.804479	1.07553	1.09268	1	0.295878	0.08482
Hepatocellular-carcinoma:ebi-a-GCST90001582	0.332255	0.882246	0.68486	1.13652	1.34842	1	0.245554	0.258391
Hepatocellular-carcinoma:ebi-a-GCST90001461	0.332336	0.893284	0.711052	1.12222	0.0108287	1	0.917121	0
Hepatocellular-carcinoma:ebi-a-GCST90001651	0.333493	1.17254	0.849241	1.61892	2.34439	1	0.125735	0.57345
Hepatocellular-carcinoma:ebi-a-GCST90001778	0.335476	0.926431	0.793011	1.0823	0.769265	1	0.380445	0
Hepatocellular-carcinoma:ebi-a-GCST90001533	0.336695	1.07258	0.929717	1.23739	0.283149	1	0.594644	0
Hepatocellular-carcinoma:ebi-a-GCST90001941	0.339122	0.896129	0.715669	1.12209	0.00962941	1	0.921829	0
Hepatocellular-carcinoma:ebi-a-GCST90001703	0.339643	0.940238	0.828525	1.06701	0.245011	1	0.62061	0
Hepatocellular-carcinoma:ebi-a-GCST90002112	0.339671	1.05923	0.941222	1.19203	0.113222	1	0.736505	0
Hepatocellular-carcinoma:ebi-a-GCST90001425	0.341107	0.872202	0.658201	1.15578	2.17528	1	0.140244	0.540289
Hepatocellular-carcinoma:ebi-a-GCST90001492	0.342081	0.954636	0.867448	1.05059	0.0959738	1	0.756716	0
Hepatocellular-carcinoma:ebi-a-GCST90001725	0.343365	1.04024	0.95872	1.1287	0.720651	1	0.395931	0
Hepatocellular-carcinoma:ebi-a-GCST90002070	0.343515	0.932129	0.805969	1.07804	0.310134	1	0.577598	0
Hepatocellular-carcinoma:ebi-a-GCST90001523	0.347936	1.06129	0.937316	1.20167	0.0456288	1	0.830852	0
Hepatocellular-carcinoma:ebi-a-GCST90001426	0.348539	0.910705	0.748938	1.10741	0.287811	1	0.591627	0
Hepatocellular-carcinoma:ebi-a-GCST90001811	0.349644	0.893406	0.705453	1.13144	0.485232	1	0.486062	0
Hepatocellular-carcinoma:ebi-a-GCST90001435	0.352557	0.945736	0.840787	1.06379	0.519239	1	0.471166	0
Hepatocellular-carcinoma:ebi-a-GCST90001694	0.353188	0.919138	0.769263	1.09821	0.253979	1	0.614287	0
Hepatocellular-carcinoma:ebi-a-GCST90001495	0.353625	0.955993	0.869273	1.05136	0.883069	1	0.347362	0
Hepatocellular-carcinoma:ebi-a-GCST90001598	0.353884	0.893485	0.704175	1.13369	0.298087	1	0.585084	0
Hepatocellular-carcinoma:ebi-a-GCST90001512	0.353933	1.05306	0.944016	1.1747	0.871272	1	0.350603	0
Hepatocellular-carcinoma:ebi-a-GCST90001967	0.357592	1.15391	0.850581	1.56541	0.165727	1	0.683937	0
Hepatocellular-carcinoma:ebi-a-GCST90001750	0.358309	1.11604	0.882969	1.41064	1.31739	1	0.251061	0.240925
Hepatocellular-carcinoma:ebi-a-GCST90001641	0.35925	0.804053	0.504426	1.28166	2.24147	1	0.134354	0.553863
Hepatocellular-carcinoma:ebi-a-GCST90001525	0.359322	1.062	0.933821	1.20778	0.758063	1	0.383935	0
Hepatocellular-carcinoma:ebi-a-GCST90001802	0.360776	0.848684	0.596941	1.20659	3.49699	1	0.0614807	0.714039
Hepatocellular-carcinoma:ebi-a-GCST90001860	0.36227	0.935388	0.810188	1.07994	0.035387	1	0.850787	0
Hepatocellular-carcinoma:ebi-a-GCST90001503	0.363192	0.970801	0.910731	1.03483	1.13082	1	0.287601	0.115683
Hepatocellular-carcinoma:ebi-a-GCST90001774	0.366745	0.883274	0.674593	1.15651	0.685101	1	0.407836	0
Hepatocellular-carcinoma:ebi-a-GCST90001544	0.368344	1.082	0.911284	1.2847	0.0488486	1	0.825079	0
Hepatocellular-carcinoma:ebi-a-GCST90001654	0.370186	0.917104	0.758967	1.10819	0.00759661	1	0.930546	0
Hepatocellular-carcinoma:ebi-a-GCST90001868	0.373971	0.929545	0.791263	1.09199	0.138184	1	0.710093	0
Hepatocellular-carcinoma:ebi-a-GCST90001795	0.376742	0.900456	0.713657	1.13615	0.00864717	1	0.925911	0
Hepatocellular-carcinoma:ebi-a-GCST90001557	0.37742	0.87268	0.644944	1.18083	0.721258	1	0.395732	0
Hepatocellular-carcinoma:ebi-a-GCST90001395	0.378562	0.880382	0.663007	1.16903	0.00903342	1	0.92428	0
Hepatocellular-carcinoma:ebi-a-GCST90001483	0.382183	0.955714	0.863389	1.05791	0.270843	1	0.602767	0
Hepatocellular-carcinoma:ebi-a-GCST90001861	0.383865	1.13231	0.856053	1.49773	2.23643	1	0.134792	0.552859
Hepatocellular-carcinoma:ebi-a-GCST90001649	0.38483	0.934064	0.800875	1.0894	0.42555	1	0.514181	0
Hepatocellular-carcinoma:ebi-a-GCST90001902	0.385988	1.08056	0.90693	1.28743	0.0105862	1	0.918051	0
Hepatocellular-carcinoma:ebi-a-GCST90002016	0.387262	1.07588	0.911499	1.26991	0.0501646	1	0.822777	0
Hepatocellular-carcinoma:ebi-a-GCST90001789	0.388442	0.917532	0.754528	1.11575	0.0279258	1	0.867283	0
Hepatocellular-carcinoma:ebi-a-GCST90001489	0.393446	0.972522	0.912237	1.03679	0.0392732	1	0.842908	0
Hepatocellular-carcinoma:ebi-a-GCST90001693	0.393967	1.03424	0.957198	1.11749	0.937501	1	0.332921	0
Hepatocellular-carcinoma:ebi-a-GCST90001658	0.394561	0.938748	0.811623	1.08579	1.32569	1	0.249574	0.245673
Hepatocellular-carcinoma:ebi-a-GCST90001863	0.394889	0.881089	0.658204	1.17945	1.81217	1	0.178248	0.448175
Hepatocellular-carcinoma:ebi-a-GCST90001473	0.396163	0.888985	0.677397	1.16666	3.03311	1	0.0815816	0.670305
Hepatocellular-carcinoma:ebi-a-GCST90002017	0.396236	0.925376	0.773578	1.10696	0.444	1	0.505198	0
Hepatocellular-carcinoma:ebi-a-GCST90002097	0.396324	0.934855	0.800096	1.09231	0.10082	1	0.750848	0
Hepatocellular-carcinoma:ebi-a-GCST90001959	0.398905	0.894341	0.689964	1.15926	0.761296	1	0.382923	0
Hepatocellular-carcinoma:ebi-a-GCST90002036	0.401136	0.919755	0.756602	1.11809	1.26557	1	0.2606	0.20984
Hepatocellular-carcinoma:ebi-a-GCST90001674	0.401192	1.06314	0.921532	1.22651	0.0166078	1	0.897459	0
Hepatocellular-carcinoma:ebi-a-GCST90001854	0.402183	0.910896	0.732218	1.13317	2.16927	1	0.140793	0.539015
Hepatocellular-carcinoma:ebi-a-GCST90001943	0.4051	1.0543	0.9309	1.19405	0.804529	1	0.369743	0
Hepatocellular-carcinoma:ebi-a-GCST90001858	0.407492	1.1259	0.850434	1.49059	4.48835	1	0.0341265	0.777201
Hepatocellular-carcinoma:ebi-a-GCST90001736	0.409045	1.11317	0.86302	1.43583	0.527976	1	0.467459	0
Hepatocellular-carcinoma:ebi-a-GCST90001897	0.409899	0.951979	0.846828	1.07019	0.0667581	1	0.796117	0
Hepatocellular-carcinoma:ebi-a-GCST90002039	0.411426	0.771958	0.416269	1.43157	8.54528	1	0.0034642	0.882976
Hepatocellular-carcinoma:ebi-a-GCST90002030	0.411708	0.832042	0.536395	1.29064	4.39327	1	0.036081	0.772379
Hepatocellular-carcinoma:ebi-a-GCST90001955	0.413034	1.03913	0.947884	1.13916	0.0325066	1	0.85692	0
Hepatocellular-carcinoma:ebi-a-GCST90001829	0.413413	0.934512	0.794504	1.09919	1.66028	1	0.197565	0.397693
Hepatocellular-carcinoma:ebi-a-GCST90002055	0.416566	0.87649	0.637704	1.20469	0.123244	1	0.725542	0
Hepatocellular-carcinoma:ebi-a-GCST90001876	0.416628	0.970183	0.901848	1.0437	0.0482413	1	0.826152	0
Hepatocellular-carcinoma:ebi-a-GCST90001573	0.417521	1.06749	0.911572	1.25009	0.613568	1	0.433448	0
Hepatocellular-carcinoma:ebi-a-GCST90002007	0.417652	0.970919	0.904042	1.04274	0.125938	1	0.722682	0
Hepatocellular-carcinoma:ebi-a-GCST90001737	0.41825	1.03766	0.948812	1.13483	0.00199941	1	0.964335	0
Hepatocellular-carcinoma:ebi-a-GCST90002083	0.42166	0.921987	0.756282	1.124	0.664568	1	0.414952	0
Hepatocellular-carcinoma:ebi-a-GCST90001865	0.422698	0.908409	0.718284	1.14886	0.0100195	1	0.920267	0
Hepatocellular-carcinoma:ebi-a-GCST90001915	0.424265	1.12063	0.847499	1.48177	1.80251	1	0.179409	0.445218
Hepatocellular-carcinoma:ebi-a-GCST90001730	0.424573	1.03987	0.944718	1.14461	0.0451033	1	0.831814	0
Hepatocellular-carcinoma:ebi-a-GCST90001660	0.42699	0.948017	0.831022	1.08148	0.352176	1	0.552884	0
Hepatocellular-carcinoma:ebi-a-GCST90001741	0.428443	1.03876	0.945452	1.14127	0.304397	1	0.581139	0
Hepatocellular-carcinoma:ebi-a-GCST90001971	0.429652	1.05811	0.919713	1.21734	0.0545476	1	0.815331	0
Hepatocellular-carcinoma:ebi-a-GCST90001402	0.430152	0.879102	0.638286	1.21078	1.92487	1	0.165321	0.480483
Hepatocellular-carcinoma:ebi-a-GCST90001547	0.433272	0.80855	0.475185	1.37579	4.26028	1	0.0390134	0.765274
Hepatocellular-carcinoma:ebi-a-GCST90001728	0.435413	1.10556	0.85914	1.42266	4.17006	1	0.0411444	0.760195
Hepatocellular-carcinoma:ebi-a-GCST90001516	0.436776	1.0797	0.889947	1.30992	0.154405	1	0.69436	0
Hepatocellular-carcinoma:ebi-a-GCST90002051	0.436809	1.08181	0.887306	1.31894	0.054271	1	0.815791	0
Hepatocellular-carcinoma:ebi-a-GCST90001782	0.437916	0.966221	0.885871	1.05386	0.330798	1	0.56519	0
Hepatocellular-carcinoma:ebi-a-GCST90001886	0.438697	1.12911	0.830354	1.53535	3.04681	1	0.0808961	0.671787
Hepatocellular-carcinoma:ebi-a-GCST90001852	0.442205	0.91382	0.726169	1.14996	4.59e-05	1	0.994593	0
Hepatocellular-carcinoma:ebi-a-GCST90001391	0.442774	1.08464	0.881407	1.33474	0.128077	1	0.720435	0
Hepatocellular-carcinoma:ebi-a-GCST90001441	0.442846	0.8814	0.638472	1.21676	0.923705	1	0.336504	0
Hepatocellular-carcinoma:ebi-a-GCST90001817	0.443178	1.12619	0.831185	1.5259	0.386422	1	0.534186	0
Hepatocellular-carcinoma:ebi-a-GCST90001554	0.446419	1.06127	0.910644	1.2368	0.938489	1	0.332667	0
Hepatocellular-carcinoma:ebi-a-GCST90001755	0.446753	0.915089	0.728099	1.1501	0.0063133	1	0.93667	0
Hepatocellular-carcinoma:ebi-a-GCST90002033	0.447007	1.05995	0.91224	1.23159	0.696201	1	0.404063	0
Hepatocellular-carcinoma:ebi-a-GCST90001722	0.447015	1.08341	0.881282	1.33189	0.474071	1	0.49112	0
Hepatocellular-carcinoma:ebi-a-GCST90001514	0.449233	1.05677	0.915937	1.21926	0.305492	1	0.58046	0
Hepatocellular-carcinoma:ebi-a-GCST90001519	0.450186	1.12414	0.829673	1.52313	3.16225	1	0.0753594	0.683769
Hepatocellular-carcinoma:ebi-a-GCST90002015	0.450336	1.06679	0.901933	1.26177	4.75e-05	1	0.9945	0
Hepatocellular-carcinoma:ebi-a-GCST90001838	0.450563	1.06369	0.906055	1.24875	1.31985	1	0.250619	0.242339
Hepatocellular-carcinoma:ebi-a-GCST90001826	0.450789	1.0761	0.889338	1.30208	0.324713	1	0.568789	0
Hepatocellular-carcinoma:ebi-a-GCST90001923	0.452832	1.14147	0.808038	1.6125	0.0835819	1	0.772501	0
Hepatocellular-carcinoma:ebi-a-GCST90001713	0.453064	0.853841	0.565095	1.29013	2.16246	1	0.141418	0.537563
Hepatocellular-carcinoma:ebi-a-GCST90001900	0.453453	0.87913	0.627746	1.23118	0.161533	1	0.687749	0
Hepatocellular-carcinoma:ebi-a-GCST90001585	0.453492	0.914963	0.72525	1.1543	1.31065	1	0.252277	0.237019
Hepatocellular-carcinoma:ebi-a-GCST90001667	0.453904	1.03393	0.947481	1.12826	0.908863	1	0.340416	0
Hepatocellular-carcinoma:ebi-a-GCST90002041	0.454126	0.889182	0.65378	1.20934	1.47873	1	0.223973	0.323744
Hepatocellular-carcinoma:ebi-a-GCST90001788	0.455819	0.903696	0.692534	1.17924	0.130719	1	0.717687	0
Hepatocellular-carcinoma:ebi-a-GCST90001662	0.45651	1.10896	0.844667	1.45596	2.39377	1	0.121819	0.582249
Hepatocellular-carcinoma:ebi-a-GCST90001882	0.45718	0.968201	0.889137	1.0543	0.92511	1	0.336137	0
Hepatocellular-carcinoma:ebi-a-GCST90001842	0.457198	1.07495	0.888463	1.30059	2.15403	1	0.142197	0.535753
Hepatocellular-carcinoma:ebi-a-GCST90002044	0.458643	1.10484	0.848755	1.4382	0.145042	1	0.703319	0
Hepatocellular-carcinoma:ebi-a-GCST90001698	0.459815	1.00002	0.999967	1.00007	1.34833	1	0.24557	0.258344
Hepatocellular-carcinoma:ebi-a-GCST90001702	0.462565	0.948549	0.823864	1.0921	1.13434	1	0.286852	0.118429
Hepatocellular-carcinoma:ebi-a-GCST90001672	0.46277	0.949849	0.827961	1.08968	0.333775	1	0.563444	0
Hepatocellular-carcinoma:ebi-a-GCST90001659	0.463942	0.834305	0.513779	1.3548	7.93667	1	0.00484428	0.874003
Hepatocellular-carcinoma:ebi-a-GCST90001452	0.465085	0.950607	0.829808	1.08899	0.337961	1	0.561008	0
Hepatocellular-carcinoma:ebi-a-GCST90001532	0.469692	1.02299	0.961863	1.08799	0.0730254	1	0.786982	0
Hepatocellular-carcinoma:ebi-a-GCST90001875	0.470196	1.05971	0.905371	1.24037	1.19691	1	0.273939	0.164518
Hepatocellular-carcinoma:ebi-a-GCST90001541	0.471363	0.935155	0.779208	1.12231	0.11015	1	0.739973	0
Hepatocellular-carcinoma:ebi-a-GCST90001872	0.471806	0.971026	0.89629	1.05199	0.319571	1	0.571866	0
Hepatocellular-carcinoma:ebi-a-GCST90001793	0.471851	0.919378	0.731216	1.15596	0.240594	1	0.623777	0
Hepatocellular-carcinoma:ebi-a-GCST90001593	0.472189	1.06761	0.893204	1.27608	0.600975	1	0.438206	0
Hepatocellular-carcinoma:ebi-a-GCST90001805	0.473229	0.939069	0.79084	1.11508	0.299421	1	0.584245	0
Hepatocellular-carcinoma:ebi-a-GCST90001960	0.473307	1.04454	0.927257	1.17666	0.154204	1	0.69455	0
Hepatocellular-carcinoma:ebi-a-GCST90001629	0.474107	1.05868	0.905635	1.2376	1.00234	1	0.316746	0.00233045
Hepatocellular-carcinoma:ebi-a-GCST90001982	0.476102	0.923919	0.743208	1.14857	2.92915	1	0.0869931	0.658604
Hepatocellular-carcinoma:ebi-a-GCST90001511	0.477071	1.03727	0.937753	1.14734	0.154884	1	0.693911	0
Hepatocellular-carcinoma:ebi-a-GCST90002022	0.48135	0.914869	0.71417	1.17197	0.501589	1	0.478803	0
Hepatocellular-carcinoma:ebi-a-GCST90001552	0.481912	0.955586	0.841939	1.08457	1.53517	1	0.215339	0.348604
Hepatocellular-carcinoma:ebi-a-GCST90002098	0.482286	0.964009	0.870314	1.06779	0.525519	1	0.468497	0
Hepatocellular-carcinoma:ebi-a-GCST90002091	0.486473	1.03891	0.933011	1.15684	0.0848499	1	0.77083	0
Hepatocellular-carcinoma:ebi-a-GCST90001482	0.486921	0.975164	0.908416	1.04682	0.844145	1	0.358214	0
Hepatocellular-carcinoma:ebi-a-GCST90001683	0.489093	1.25545	0.658972	2.39184	2.63818	1	0.104323	0.620951
Hepatocellular-carcinoma:ebi-a-GCST90001832	0.489609	1.07216	0.879883	1.30644	0.000168901	1	0.989631	0
Hepatocellular-carcinoma:ebi-a-GCST90001606	0.489811	0.874778	0.598415	1.27877	0.00033975	1	0.985294	0
Hepatocellular-carcinoma:ebi-a-GCST90001464	0.490231	1.04119	0.928389	1.1677	0.320717	1	0.571177	0
Hepatocellular-carcinoma:ebi-a-GCST90001498	0.492633	0.914208	0.707567	1.1812	0.287983	1	0.591516	0
Hepatocellular-carcinoma:ebi-a-GCST90002117	0.492848	0.949128	0.817559	1.10187	0.0795508	1	0.777907	0
Hepatocellular-carcinoma:ebi-a-GCST90001939	0.49375	0.901522	0.669931	1.21317	0.855676	1	0.354951	0
Hepatocellular-carcinoma:ebi-a-GCST90001989	0.497895	1.03727	0.933131	1.15302	0.729781	1	0.392954	0
Hepatocellular-carcinoma:ebi-a-GCST90001746	0.498569	1.07554	0.871032	1.32805	0.00116216	1	0.972805	0
Hepatocellular-carcinoma:ebi-a-GCST90001506	0.498675	0.919584	0.721305	1.17237	0.00910271	1	0.923991	0
Hepatocellular-carcinoma:ebi-a-GCST90001719	0.499205	0.9307	0.755689	1.14624	2.59842	1	0.10697	0.61515
Hepatocellular-carcinoma:ebi-a-GCST90001710	0.499656	0.90188	0.668224	1.21724	4.09842	1	0.0429234	0.756003
Hepatocellular-carcinoma:ebi-a-GCST90001724	0.499775	0.955873	0.838449	1.08974	0.21793	1	0.640622	0
Hepatocellular-carcinoma:ebi-a-GCST90002046	0.502294	1.02435	0.954825	1.09894	0.0819511	1	0.77467	0
Hepatocellular-carcinoma:ebi-a-GCST90002109	0.502949	1.06164	0.89119	1.26469	0.284894	1	0.593511	0
Hepatocellular-carcinoma:ebi-a-GCST90001738	0.503402	0.940677	0.786407	1.12521	1.76e-05	1	0.996652	0
Hepatocellular-carcinoma:ebi-a-GCST90001652	0.505419	1.09762	0.834457	1.44378	0.0216592	1	0.882997	0
Hepatocellular-carcinoma:ebi-a-GCST90001440	0.506671	1.08708	0.84963	1.3909	1.26666	1	0.260394	0.210523
Hepatocellular-carcinoma:ebi-a-GCST90001392	0.507162	0.913542	0.699328	1.19337	4.56618	1	0.0326091	0.780999
Hepatocellular-carcinoma:ebi-a-GCST90001578	0.507701	1.09487	0.837329	1.43163	0.366117	1	0.545129	0
Hepatocellular-carcinoma:ebi-a-GCST90001499	0.507987	0.951208	0.820264	1.10305	1.89985	1	0.168095	0.473642
Hepatocellular-carcinoma:ebi-a-GCST90001925	0.508584	1.11439	0.808303	1.53639	0.050072	1	0.822938	0
Hepatocellular-carcinoma:ebi-a-GCST90001712	0.508652	0.950611	0.818033	1.10467	0.884534	1	0.346963	0
Hepatocellular-carcinoma:ebi-a-GCST90001950	0.509483	1.04274	0.920819	1.18079	0.0155961	1	0.900615	0
Hepatocellular-carcinoma:ebi-a-GCST90001675	0.51088	0.936175	0.769079	1.13958	0.220213	1	0.638878	0
Hepatocellular-carcinoma:ebi-a-GCST90001559	0.51132	1.167	0.736068	1.85022	4.43346	1	0.035241	0.774443
Hepatocellular-carcinoma:ebi-a-GCST90001731	0.514449	1.12836	0.784822	1.62226	2.4865	1	0.114827	0.597828
Hepatocellular-carcinoma:ebi-a-GCST90001605	0.514633	0.954346	0.829213	1.09836	0.257727	1	0.611686	0
Hepatocellular-carcinoma:ebi-a-GCST90001496	0.517131	1.03473	0.933178	1.14733	0.724383	1	0.39471	0
Hepatocellular-carcinoma:ebi-a-GCST90001408	0.51927	1.22262	0.663465	2.25303	10.5199	1	0.00118098	0.904942
Hepatocellular-carcinoma:ebi-a-GCST90002052	0.519798	0.905635	0.669689	1.22471	3.49647	1	0.0614996	0.713998
Hepatocellular-carcinoma:ebi-a-GCST90001522	0.52065	1.07466	0.862697	1.33869	0.595614	1	0.440256	0
Hepatocellular-carcinoma:ebi-a-GCST90001917	0.523235	0.975957	0.905689	1.05168	0.00258635	1	0.95944	0
Hepatocellular-carcinoma:ebi-a-GCST90001739	0.526852	1.08343	0.845307	1.38864	0.326572	1	0.567685	0
Hepatocellular-carcinoma:ebi-a-GCST90001827	0.52687	1.11496	0.795937	1.56186	1.74587	1	0.186396	0.427221
Hepatocellular-carcinoma:ebi-a-GCST90002069	0.5283	0.943036	0.785885	1.13161	0.601471	1	0.438017	0
Hepatocellular-carcinoma:ebi-a-GCST90002094	0.528527	1.03711	0.925995	1.16157	0.603623	1	0.437199	0
Hepatocellular-carcinoma:ebi-a-GCST90001650	0.529148	0.940094	0.775557	1.13954	0.0387931	1	0.843859	0
Hepatocellular-carcinoma:ebi-a-GCST90001584	0.529391	1.15937	0.731285	1.83805	4.15769	1	0.0414459	0.759482
Hepatocellular-carcinoma:ebi-a-GCST90001657	0.53016	0.790764	0.379957	1.64573	4.31778	1	0.037716	0.7684
Hepatocellular-carcinoma:ebi-a-GCST90001518	0.530491	0.979264	0.917201	1.04553	0.0696398	1	0.791862	0
Hepatocellular-carcinoma:ebi-a-GCST90001676	0.531493	1.16225	0.725709	1.86139	0.128278	1	0.720224	0
Hepatocellular-carcinoma:ebi-a-GCST90001468	0.533266	0.919148	0.705019	1.19831	1.47107	1	0.225177	0.320222
Hepatocellular-carcinoma:ebi-a-GCST90002068	0.535224	0.916803	0.696676	1.20648	2.36792	1	0.123852	0.577689
Hepatocellular-carcinoma:ebi-a-GCST90001905	0.535657	1.07667	0.852245	1.36019	1.64819	1	0.199205	0.393274
Hepatocellular-carcinoma:ebi-a-GCST90002066	0.535715	0.95038	0.808998	1.11647	0.523867	1	0.469197	0
Hepatocellular-carcinoma:ebi-a-GCST90002059	0.536553	0.91826	0.70068	1.20341	0.422069	1	0.515906	0
Hepatocellular-carcinoma:ebi-a-GCST90001404	0.537984	0.897497	0.636154	1.2662	4.86424	1	0.0274189	0.794418
Hepatocellular-carcinoma:ebi-a-GCST90001581	0.539704	1.04709	0.903892	1.21297	0.683674	1	0.408324	0
Hepatocellular-carcinoma:ebi-a-GCST90001493	0.539793	1.03922	0.918963	1.17522	1.47303	1	0.224868	0.321128
Hepatocellular-carcinoma:ebi-a-GCST90001474	0.541296	0.915928	0.691021	1.21404	3.50842	1	0.0610577	0.714971
Hepatocellular-carcinoma:ebi-a-GCST90001856	0.541888	1.04467	0.907805	1.20217	0.778654	1	0.377553	0
Hepatocellular-carcinoma:ebi-a-GCST90002040	0.545519	0.958416	0.835114	1.09992	0.54426	1	0.460672	0
Hepatocellular-carcinoma:ebi-a-GCST90001711	0.547261	0.919937	0.701033	1.2072	4.16584	1	0.0412469	0.759952
Hepatocellular-carcinoma:ebi-a-GCST90002089	0.5493	1.15244	0.724334	1.83356	5.6439	1	0.0175162	0.822817
Hepatocellular-carcinoma:ebi-a-GCST90001847	0.550623	0.951377	0.807726	1.12058	0.207076	1	0.649069	0
Hepatocellular-carcinoma:ebi-a-GCST90001996	0.552247	0.95917	0.835983	1.10051	1.34881	1	0.245486	0.258608
Hepatocellular-carcinoma:ebi-a-GCST90001877	0.554263	0.969451	0.874722	1.07444	0.0158626	1	0.899774	0
Hepatocellular-carcinoma:ebi-a-GCST90001807	0.554378	1.09478	0.810877	1.47807	0.00448515	1	0.946605	0
Hepatocellular-carcinoma:ebi-a-GCST90001406	0.557623	0.849325	0.492043	1.46604	8.2048	1	0.00417797	0.87812
Hepatocellular-carcinoma:ebi-a-GCST90001871	0.557892	1.05049	0.890932	1.23861	0.264259	1	0.607209	0
Hepatocellular-carcinoma:ebi-a-GCST90001664	0.559903	0.983882	0.931577	1.03912	0.402302	1	0.525903	0
Hepatocellular-carcinoma:ebi-a-GCST90001839	0.561584	0.942983	0.773425	1.14971	0.643279	1	0.422526	0
Hepatocellular-carcinoma:ebi-a-GCST90001456	0.561787	1.09444	0.806862	1.4845	0.140852	1	0.707436	0
Hepatocellular-carcinoma:ebi-a-GCST90001794	0.562132	0.926843	0.716884	1.19829	5.78114	1	0.016199	0.827024
Hepatocellular-carcinoma:ebi-a-GCST90001480	0.563118	0.957839	0.827715	1.10842	0.0406829	1	0.840151	0
Hepatocellular-carcinoma:ebi-a-GCST90001760	0.565204	1.15361	0.708869	1.8774	5.78053	1	0.0162047	0.827005
Hepatocellular-carcinoma:ebi-a-GCST90001705	0.565734	0.946301	0.783844	1.14243	1.85562	1	0.173132	0.461096
Hepatocellular-carcinoma:ebi-a-GCST90001904	0.566049	1.07586	0.838114	1.38104	1.37206	1	0.241458	0.271171
Hepatocellular-carcinoma:ebi-a-GCST90001583	0.567479	1.02663	0.938174	1.12344	0.0708007	1	0.790175	0
Hepatocellular-carcinoma:ebi-a-GCST90001899	0.568446	0.948993	0.792734	1.13605	0.817283	1	0.365976	0
Hepatocellular-carcinoma:ebi-a-GCST90001909	0.570271	0.869503	0.536524	1.40914	1.46094	1	0.226781	0.315507
Hepatocellular-carcinoma:ebi-a-GCST90001699	0.571208	0.998386	0.992822	1.00398	0.968167	1	0.325138	0
Hepatocellular-carcinoma:ebi-a-GCST90001462	0.572055	0.969204	0.869545	1.08028	1.04456	1	0.306764	0.0426557
Hepatocellular-carcinoma:ebi-a-GCST90001775	0.572823	0.966523	0.858643	1.08796	0.971224	1	0.324375	0
Hepatocellular-carcinoma:ebi-a-GCST90001631	0.575343	1.06246	0.859523	1.3133	0.0498641	1	0.8233	0
Hepatocellular-carcinoma:ebi-a-GCST90001507	0.57649	0.961914	0.839376	1.10234	0.701645	1	0.402232	0
Hepatocellular-carcinoma:ebi-a-GCST90001954	0.578996	1.0249	0.939623	1.11791	0.0022661	1	0.962032	0
Hepatocellular-carcinoma:ebi-a-GCST90001815	0.580063	0.967688	0.861401	1.08709	0.0369348	1	0.847598	0
Hepatocellular-carcinoma:ebi-a-GCST90001709	0.580649	0.947616	0.782937	1.14693	2.54957	1	0.110324	0.607777
Hepatocellular-carcinoma:ebi-a-GCST90001695	0.580788	1.00003	0.999927	1.00013	1.1746	1	0.278458	0.148646
Hepatocellular-carcinoma:ebi-a-GCST90001783	0.583992	1.07389	0.83203	1.38606	0.00014642	1	0.990345	0
Hepatocellular-carcinoma:ebi-a-GCST90001841	0.584734	1.04072	0.901917	1.20088	0.618293	1	0.431682	0
Hepatocellular-carcinoma:ebi-a-GCST90001881	0.591133	1.07261	0.830575	1.38517	1.75964	1	0.18467	0.4317
Hepatocellular-carcinoma:ebi-a-GCST90001825	0.592887	0.965898	0.850532	1.09691	0.0659001	1	0.797402	0
Hepatocellular-carcinoma:ebi-a-GCST90002106	0.59359	1.03284	0.917255	1.16299	0.422071	1	0.515905	0
Hepatocellular-carcinoma:ebi-a-GCST90002079	0.594176	1.06854	0.837292	1.36366	1.03436	1	0.309136	0.033223
Hepatocellular-carcinoma:ebi-a-GCST90001471	0.595089	0.954132	0.802434	1.13451	0.0521183	1	0.819417	0
Hepatocellular-carcinoma:ebi-a-GCST90001846	0.596227	0.930812	0.713963	1.21352	0.0541865	1	0.815932	0
Hepatocellular-carcinoma:ebi-a-GCST90001618	0.59691	0.971689	0.87358	1.08082	0.146137	1	0.702254	0
Hepatocellular-carcinoma:ebi-a-GCST90001560	0.600192	1.02452	0.935787	1.12167	1.57327	1	0.209733	0.364379
Hepatocellular-carcinoma:ebi-a-GCST90001936	0.602758	1.03613	0.906505	1.18428	1.03254	1	0.309562	0.0315192
Hepatocellular-carcinoma:ebi-a-GCST90001999	0.602936	1.05693	0.857922	1.30209	0.00766694	1	0.930226	0
Hepatocellular-carcinoma:ebi-a-GCST90001885	0.604395	1.03256	0.914692	1.16561	0.828489	1	0.36271	0
Hepatocellular-carcinoma:ebi-a-GCST90002023	0.605932	0.926329	0.692629	1.23888	1.19572	1	0.274179	0.163683
Hepatocellular-carcinoma:ebi-a-GCST90001681	0.606399	0.948229	0.774621	1.16075	1.05411	1	0.304562	0.0513351
Hepatocellular-carcinoma:ebi-a-GCST90001751	0.607783	1.05758	0.854008	1.30969	0.206496	1	0.649528	0
Hepatocellular-carcinoma:ebi-a-GCST90001488	0.611122	1.05141	0.866672	1.27551	0.0976267	1	0.754696	0
Hepatocellular-carcinoma:ebi-a-GCST90001646	0.611747	1.02357	0.935513	1.11992	0.73873	1	0.390068	0
Hepatocellular-carcinoma:ebi-a-GCST90001626	0.612125	0.94064	0.742493	1.19167	0.264363	1	0.607138	0
Hepatocellular-carcinoma:ebi-a-GCST90002034	0.6128	1.04823	0.873442	1.25799	3.24303	1	0.0717277	0.691647
Hepatocellular-carcinoma:ebi-a-GCST90001612	0.613128	0.942757	0.750176	1.18478	0.0465903	1	0.829106	0
Hepatocellular-carcinoma:ebi-a-GCST90001929	0.615783	0.861468	0.481183	1.5423	5.22475	1	0.0222676	0.808603
Hepatocellular-carcinoma:ebi-a-GCST90001638	0.6159	1.05291	0.860827	1.28784	0.00315452	1	0.95521	0
Hepatocellular-carcinoma:ebi-a-GCST90002049	0.616974	0.947878	0.768511	1.16911	0.0580939	1	0.809534	0
Hepatocellular-carcinoma:ebi-a-GCST90001981	0.619355	1.05102	0.863654	1.27905	2.94209	1	0.0862991	0.660105
Hepatocellular-carcinoma:ebi-a-GCST90001816	0.621543	0.957077	0.804084	1.13918	0.670301	1	0.412947	0
Hepatocellular-carcinoma:ebi-a-GCST90001997	0.621845	0.961702	0.823472	1.12314	0.381719	1	0.536685	0
Hepatocellular-carcinoma:ebi-a-GCST90001520	0.625276	0.972821	0.870978	1.08657	0.0851891	1	0.770385	0
Hepatocellular-carcinoma:ebi-a-GCST90001721	0.628159	0.928259	0.6868	1.25461	2.212	1	0.136941	0.547921
Hepatocellular-carcinoma:ebi-a-GCST90001921	0.631029	1.07131	0.808794	1.41903	2.17993	1	0.139821	0.541269
Hepatocellular-carcinoma:ebi-a-GCST90001914	0.632122	1.04508	0.872462	1.25186	0.239562	1	0.624523	0
Hepatocellular-carcinoma:ebi-a-GCST90001910	0.632731	0.973291	0.871007	1.08759	0.151197	1	0.697394	0
Hepatocellular-carcinoma:ebi-a-GCST90001894	0.633568	0.945871	0.752432	1.18904	2.45124	1	0.117432	0.592044
Hepatocellular-carcinoma:ebi-a-GCST90002061	0.634977	0.965791	0.836514	1.11505	0.266263	1	0.60585	0
Hepatocellular-carcinoma:ebi-a-GCST90001874	0.635429	1.03005	0.911369	1.1642	0.013408	1	0.907817	0
Hepatocellular-carcinoma:ebi-a-GCST90001792	0.637135	0.962245	0.820044	1.1291	0.270221	1	0.603183	0
Hepatocellular-carcinoma:ebi-a-GCST90001937	0.637995	1.19013	0.576355	2.45754	7.92568	1	0.0048738	0.873828
Hepatocellular-carcinoma:ebi-a-GCST90001707	0.639281	0.929203	0.683533	1.26317	5.35249	1	0.0206927	0.813171
Hepatocellular-carcinoma:ebi-a-GCST90001938	0.639705	0.92949	0.684364	1.26242	0.645227	1	0.421824	0
Hepatocellular-carcinoma:ebi-a-GCST90001517	0.64177	1.01836	0.943213	1.0995	0.016841	1	0.896746	0
Hepatocellular-carcinoma:ebi-a-GCST90001423	0.649171	1.07927	0.776939	1.49926	0.266601	1	0.605621	0
Hepatocellular-carcinoma:ebi-a-GCST90002064	0.650848	0.908626	0.600024	1.37595	1.71736	1	0.190033	0.417712
Hepatocellular-carcinoma:ebi-a-GCST90001632	0.651351	1.05072	0.847794	1.30222	0.0114857	1	0.914653	0
Hepatocellular-carcinoma:ebi-a-GCST90001813	0.65185	0.959153	0.800219	1.14965	0.0656908	1	0.797717	0
Hepatocellular-carcinoma:ebi-a-GCST90001970	0.652245	1.03015	0.905296	1.17223	0.120116	1	0.728908	0
Hepatocellular-carcinoma:ebi-a-GCST90001579	0.653182	1.05012	0.848408	1.29978	0.421445	1	0.516217	0
Hepatocellular-carcinoma:ebi-a-GCST90001403	0.653845	0.934005	0.693033	1.25877	0.00124443	1	0.971859	0
Hepatocellular-carcinoma:ebi-a-GCST90001953	0.6561	1.02128	0.930896	1.12043	0.0391203	1	0.843211	0
Hepatocellular-carcinoma:ebi-a-GCST90002048	0.656255	0.959047	0.797761	1.15294	0.129394	1	0.719061	0
Hepatocellular-carcinoma:ebi-a-GCST90001820	0.657914	1.03962	0.875346	1.23473	0.0813487	1	0.775478	0
Hepatocellular-carcinoma:ebi-a-GCST90001479	0.658152	0.94579	0.738882	1.21064	1.20941	1	0.271449	0.173152
Hepatocellular-carcinoma:ebi-a-GCST90001670	0.661002	0.956627	0.784647	1.1663	0.0100554	1	0.920125	0
Hepatocellular-carcinoma:ebi-a-GCST90001883	0.662929	1.03895	0.87492	1.23374	0.00250102	1	0.960114	0
Hepatocellular-carcinoma:ebi-a-GCST90001576	0.664042	1.05873	0.818352	1.36972	0.267341	1	0.605121	0
Hepatocellular-carcinoma:ebi-a-GCST90002121	0.664896	0.921788	0.637668	1.3325	2.63078	1	0.10481	0.619885
Hepatocellular-carcinoma:ebi-a-GCST90001669	0.664947	1.01483	0.949423	1.08474	2.27789	1	0.13123	0.560998
Hepatocellular-carcinoma:ebi-a-GCST90001494	0.665338	0.980551	0.897059	1.07181	0.362251	1	0.547259	0
Hepatocellular-carcinoma:ebi-a-GCST90001401	0.665662	0.948708	0.747156	1.20463	0.206667	1	0.649392	0
Hepatocellular-carcinoma:ebi-a-GCST90001747	0.665692	0.98168	0.9027	1.06757	0.839781	1	0.35946	0
Hepatocellular-carcinoma:ebi-a-GCST90001530	0.665937	0.973658	0.862531	1.0991	0.630386	1	0.427214	0
Hepatocellular-carcinoma:ebi-a-GCST90002009	0.667743	1.04545	0.853409	1.28072	1.41626	1	0.23402	0.293914
Hepatocellular-carcinoma:ebi-a-GCST90001812	0.668978	0.95882	0.790711	1.16267	0.0113214	1	0.915263	0
Hepatocellular-carcinoma:ebi-a-GCST90002028	0.669017	0.963653	0.813207	1.14193	0.0464938	1	0.829281	0
Hepatocellular-carcinoma:ebi-a-GCST90001432	0.669697	1.058	0.81654	1.37087	0.988947	1	0.32	0
Hepatocellular-carcinoma:ebi-a-GCST90001889	0.675149	1.03569	0.879027	1.22028	0.875829	1	0.349347	0
Hepatocellular-carcinoma:ebi-a-GCST90001840	0.675797	1.04315	0.855777	1.27155	0.045616	1	0.830875	0
Hepatocellular-carcinoma:ebi-a-GCST90001586	0.676259	1.03535	0.879568	1.21873	1.86854	1	0.171642	0.464823
Hepatocellular-carcinoma:ebi-a-GCST90001536	0.676471	1.04436	0.851741	1.28055	2.50689	1	0.113349	0.601099
Hepatocellular-carcinoma:ebi-a-GCST90001958	0.67756	1.04341	0.854017	1.2748	0.709767	1	0.399521	0
Hepatocellular-carcinoma:ebi-a-GCST90001717	0.679983	0.965039	0.814906	1.14283	1.88488	1	0.169781	0.469461
Hepatocellular-carcinoma:ebi-a-GCST90001979	0.680426	1.06216	0.797181	1.41523	3.86924	1	0.0491787	0.741552
Hepatocellular-carcinoma:ebi-a-GCST90002084	0.681062	0.971019	0.843962	1.11721	1.4862	1	0.222807	0.327144
Hepatocellular-carcinoma:ebi-a-GCST90001451	0.684276	0.962753	0.801782	1.15604	0.967996	1	0.325181	0
Hepatocellular-carcinoma:ebi-a-GCST90001808	0.685089	1.03331	0.881981	1.21059	0.405324	1	0.524353	0
Hepatocellular-carcinoma:ebi-a-GCST90001918	0.686103	0.971631	0.845061	1.11716	0.225944	1	0.634548	0
Hepatocellular-carcinoma:ebi-a-GCST90001700	0.686168	0.999213	0.995403	1.00304	2.76522	1	0.0963335	0.638365
Hepatocellular-carcinoma:ebi-a-GCST90001956	0.68831	1.0172	0.935863	1.10562	0.279137	1	0.597268	0
Hepatocellular-carcinoma:ebi-a-GCST90001963	0.69274	0.983054	0.903148	1.07003	0.204063	1	0.651461	0
Hepatocellular-carcinoma:ebi-a-GCST90001643	0.696006	0.982008	0.896521	1.07565	0.557114	1	0.455426	0
Hepatocellular-carcinoma:ebi-a-GCST90001973	0.697637	0.964599	0.804227	1.15695	0.82112	1	0.364853	0
Hepatocellular-carcinoma:ebi-a-GCST90002108	0.698096	1.02868	0.891715	1.18669	1.45315	1	0.228024	0.311838
Hepatocellular-carcinoma:ebi-a-GCST90001723	0.701448	0.968922	0.8245	1.13864	0.646534	1	0.421355	0
Hepatocellular-carcinoma:ebi-a-GCST90001410	0.701752	1.07932	0.730288	1.59516	1.56421	1	0.21105	0.360699
Hepatocellular-carcinoma:ebi-a-GCST90002095	0.70209	1.03704	0.86071	1.2495	0.0560257	1	0.812891	0
Hepatocellular-carcinoma:ebi-a-GCST90001613	0.70306	0.965544	0.806258	1.1563	1.31898	1	0.250775	0.241838
Hepatocellular-carcinoma:ebi-a-GCST90001528	0.705211	1.01938	0.922896	1.12594	4.69e-07	1	0.999453	0
Hepatocellular-carcinoma:ebi-a-GCST90001663	0.707375	1.02741	0.892141	1.18318	0.456257	1	0.499378	0
Hepatocellular-carcinoma:ebi-a-GCST90001607	0.71368	0.947647	0.711048	1.26297	0.0657084	1	0.797691	0
Hepatocellular-carcinoma:ebi-a-GCST90001850	0.713842	0.960887	0.776353	1.18928	0.338971	1	0.560424	0
Hepatocellular-carcinoma:ebi-a-GCST90001848	0.721257	0.954882	0.740976	1.23054	0.00158408	1	0.968252	0
Hepatocellular-carcinoma:ebi-a-GCST90001957	0.722473	1.01524	0.933926	1.10364	0.400034	1	0.527072	0
Hepatocellular-carcinoma:ebi-a-GCST90002056	0.723141	0.971252	0.826505	1.14135	0.22233	1	0.637271	0
Hepatocellular-carcinoma:ebi-a-GCST90001931	0.726277	0.910025	0.536799	1.54275	1.40718	1	0.235526	0.289357
Hepatocellular-carcinoma:ebi-a-GCST90001901	0.735056	1.01897	0.913875	1.13616	0.214522	1	0.643246	0
Hepatocellular-carcinoma:ebi-a-GCST90002035	0.736086	0.958761	0.750503	1.22481	1.59725	1	0.206293	0.373925
Hepatocellular-carcinoma:ebi-a-GCST90001749	0.73824	0.935118	0.630956	1.38591	3.20203	1	0.0735468	0.687698
Hepatocellular-carcinoma:ebi-a-GCST90001601	0.738359	1.03623	0.840931	1.27689	0.0203341	1	0.886608	0
Hepatocellular-carcinoma:ebi-a-GCST90001987	0.738444	1.01022	0.951706	1.07232	0.484612	1	0.486341	0
Hepatocellular-carcinoma:ebi-a-GCST90001975	0.739481	1.05438	0.771719	1.44057	3.87474	1	0.049018	0.741918
Hepatocellular-carcinoma:ebi-a-GCST90001947	0.739512	0.985652	0.905164	1.0733	0.154896	1	0.6939	0
Hepatocellular-carcinoma:ebi-a-GCST90001420	0.739914	0.948407	0.693698	1.29664	0.0025141	1	0.96001	0
Hepatocellular-carcinoma:ebi-a-GCST90001819	0.740177	0.968674	0.80257	1.16916	0.0109401	1	0.916697	0
Hepatocellular-carcinoma:ebi-a-GCST90001867	0.740674	1.0855	0.667774	1.76453	6.18753	1	0.0128654	0.838385
Hepatocellular-carcinoma:ebi-a-GCST90001785	0.740864	0.95834	0.744721	1.23323	1.37834	1	0.240384	0.274491
Hepatocellular-carcinoma:ebi-a-GCST90001779	0.741576	1.01524	0.927962	1.11072	0.805074	1	0.369581	0
Hepatocellular-carcinoma:ebi-a-GCST90001988	0.741589	1.02136	0.900783	1.15808	0.247208	1	0.619048	0
Hepatocellular-carcinoma:ebi-a-GCST90001870	0.742469	1.02708	0.875782	1.2045	0.350903	1	0.553603	0
Hepatocellular-carcinoma:ebi-a-GCST90001913	0.742859	0.941846	0.658463	1.34719	2.01109	1	0.156153	0.502758
Hepatocellular-carcinoma:ebi-a-GCST90001729	0.742959	0.963581	0.771956	1.20277	0.0188037	1	0.890931	0
Hepatocellular-carcinoma:ebi-a-GCST90001476	0.743542	1.04954	0.785591	1.40218	0.123123	1	0.725672	0
Hepatocellular-carcinoma:ebi-a-GCST90001436	0.743915	1.01805	0.91443	1.13342	0.972636	1	0.324024	0
Hepatocellular-carcinoma:ebi-a-GCST90001984	0.744345	0.946004	0.677647	1.32063	2.19974	1	0.138034	0.545401
Hepatocellular-carcinoma:ebi-a-GCST90001928	0.744409	1.05275	0.772867	1.434	2.39185	1	0.121969	0.581913
Hepatocellular-carcinoma:ebi-a-GCST90001974	0.745126	0.96341	0.76949	1.2062	0.211044	1	0.64595	0
Hepatocellular-carcinoma:ebi-a-GCST90002037	0.745846	0.962596	0.764416	1.21216	2.04608	1	0.152599	0.51126
Hepatocellular-carcinoma:ebi-a-GCST90001545	0.748087	0.921241	0.558412	1.51982	1.81795	1	0.177557	0.449931
Hepatocellular-carcinoma:ebi-a-GCST90002075	0.750604	0.939411	0.638957	1.38115	1.28329	1	0.257288	0.220753
Hepatocellular-carcinoma:ebi-a-GCST90001602	0.750638	1.04459	0.798182	1.36707	2.18168	1	0.139662	0.541638
Hepatocellular-carcinoma:ebi-a-GCST90001949	0.750649	1.01442	0.928706	1.10804	0.0252802	1	0.873671	0
Hepatocellular-carcinoma:ebi-a-GCST90001796	0.753417	1.12499	0.53954	2.3457	6.38002	1	0.0115412	0.843261
Hepatocellular-carcinoma:ebi-a-GCST90001655	0.753506	1.07023	0.700639	1.63478	2.85542	1	0.0910663	0.649789
Hepatocellular-carcinoma:ebi-a-GCST90001463	0.754372	0.961795	0.753539	1.22761	1.71499	1	0.19034	0.416905
Hepatocellular-carcinoma:ebi-a-GCST90001590	0.756427	1.02843	0.861487	1.22772	0.858657	1	0.354115	0
Hepatocellular-carcinoma:ebi-a-GCST90001952	0.757357	0.984802	0.893625	1.08528	0.00586	1	0.938981	0
Hepatocellular-carcinoma:ebi-a-GCST90001732	0.757379	1.04089	0.807178	1.34228	0.0835029	1	0.772605	0
Hepatocellular-carcinoma:ebi-a-GCST90001398	0.75876	1.06531	0.711405	1.59529	2.01935	1	0.155305	0.504792
Hepatocellular-carcinoma:ebi-a-GCST90001396	0.758782	0.952461	0.69797	1.29974	0.000138719	1	0.990603	0
Hepatocellular-carcinoma:ebi-a-GCST90002111	0.761066	0.978423	0.850091	1.12613	0.0713609	1	0.789366	0
Hepatocellular-carcinoma:ebi-a-GCST90001442	0.761225	0.955134	0.710362	1.28425	5.13699	1	0.0234213	0.805333
Hepatocellular-carcinoma:ebi-a-GCST90002011	0.763211	0.941752	0.637347	1.39155	0.0199646	1	0.887636	0
Hepatocellular-carcinoma:ebi-a-GCST90001718	0.764774	0.964001	0.758194	1.22567	2.67417	1	0.101988	0.626052
Hepatocellular-carcinoma:ebi-a-GCST90001537	0.765378	0.978039	0.845315	1.1316	0.0438518	1	0.83413	0
Hepatocellular-carcinoma:ebi-a-GCST90001572	0.766557	0.955185	0.705715	1.29284	0.039732	1	0.842005	0
Hepatocellular-carcinoma:ebi-a-GCST90002038	0.766626	0.97177	0.80433	1.17407	1.44524	1	0.229294	0.308072
Hepatocellular-carcinoma:ebi-a-GCST90002062	0.767946	1.04266	0.789986	1.37616	1.54222	1	0.214288	0.351583
Hepatocellular-carcinoma:ebi-a-GCST90001501	0.769394	1.01369	0.925607	1.11016	0.889731	1	0.34555	0
Hepatocellular-carcinoma:ebi-a-GCST90001543	0.76949	0.96695	0.772294	1.21067	1.86748	1	0.171764	0.464518
Hepatocellular-carcinoma:ebi-a-GCST90001535	0.770274	1.02443	0.871236	1.20455	0.0799064	1	0.777424	0
Hepatocellular-carcinoma:ebi-a-GCST90002042	0.77139	1.03002	0.843695	1.2575	0.0869092	1	0.768144	0
Hepatocellular-carcinoma:ebi-a-GCST90001821	0.771545	0.97928	0.850212	1.12794	0.0395333	1	0.842396	0
Hepatocellular-carcinoma:ebi-a-GCST90001752	0.774314	0.977558	0.837075	1.14162	0.450482	1	0.502106	0
Hepatocellular-carcinoma:ebi-a-GCST90001932	0.774566	0.943426	0.633326	1.40536	3.19294	1	0.073957	0.686809
Hepatocellular-carcinoma:ebi-a-GCST90001887	0.777561	1.01917	0.893355	1.16271	0.0094055	1	0.922741	0
Hepatocellular-carcinoma:ebi-a-GCST90001475	0.779794	1.03701	0.803772	1.33794	1.73522	1	0.187746	0.423704
Hepatocellular-carcinoma:ebi-a-GCST90002076	0.780196	0.976595	0.826943	1.15333	0.0205426	1	0.886032	0
Hepatocellular-carcinoma:ebi-a-GCST90001986	0.780735	0.969974	0.782597	1.20222	0.844766	1	0.358037	0
Hepatocellular-carcinoma:ebi-a-GCST90001706	0.782335	0.97301	0.801346	1.18145	0.0591217	1	0.807889	0
Hepatocellular-carcinoma:ebi-a-GCST90001780	0.782417	0.976776	0.826743	1.15404	0.0291382	1	0.86446	0
Hepatocellular-carcinoma:ebi-a-GCST90001397	0.783192	1.04433	0.766741	1.42242	2.81997	1	0.093098	0.645387
Hepatocellular-carcinoma:ebi-a-GCST90001845	0.783779	0.972631	0.797747	1.18585	1.22703	1	0.267986	0.185021
Hepatocellular-carcinoma:ebi-a-GCST90001458	0.786019	0.978475	0.836229	1.14492	0.234198	1	0.628428	0
Hepatocellular-carcinoma:ebi-a-GCST90001510	0.786387	0.985652	0.887832	1.09425	0.484231	1	0.486512	0
Hepatocellular-carcinoma:ebi-a-GCST90001687	0.787842	1.04313	0.766993	1.41867	0.0026952	1	0.958596	0
Hepatocellular-carcinoma:ebi-a-GCST90001526	0.788547	1.0203	0.880948	1.18169	0.397561	1	0.528352	0
Hepatocellular-carcinoma:ebi-a-GCST90001417	0.79173	0.962382	0.724017	1.27922	1.71775	1	0.189983	0.417844
Hepatocellular-carcinoma:ebi-a-GCST90002099	0.792695	0.980949	0.849864	1.13225	0.002011	1	0.964232	0
Hepatocellular-carcinoma:ebi-a-GCST90002067	0.795454	0.974805	0.803767	1.18224	0.930286	1	0.334789	0
Hepatocellular-carcinoma:ebi-a-GCST90001427	0.796418	0.967523	0.75288	1.24336	0.922276	1	0.336878	0
Hepatocellular-carcinoma:ebi-a-GCST90002006	0.797598	1.01442	0.909258	1.13175	0.000475474	1	0.982603	0
Hepatocellular-carcinoma:ebi-a-GCST90001948	0.798903	1.0111	0.928807	1.10067	0.24745	1	0.618877	0
Hepatocellular-carcinoma:ebi-a-GCST90001597	0.800198	0.961848	0.711673	1.29997	0.0543244	1	0.815702	0
Hepatocellular-carcinoma:ebi-a-GCST90002019	0.801229	0.982757	0.858301	1.12526	0.147183	1	0.701242	0
Hepatocellular-carcinoma:ebi-a-GCST90001890	0.801422	0.974743	0.798569	1.18978	0.227317	1	0.63352	0
Hepatocellular-carcinoma:ebi-a-GCST90001878	0.805549	0.986797	0.88771	1.09694	0.0078754	1	0.929286	0
Hepatocellular-carcinoma:ebi-a-GCST90002000	0.806137	0.970305	0.762701	1.23442	2.1869	1	0.139189	0.542732
Hepatocellular-carcinoma:ebi-a-GCST90001529	0.807326	1.02999	0.812262	1.30608	0.306986	1	0.579536	0
Hepatocellular-carcinoma:ebi-a-GCST90001880	0.815257	1.01081	0.923608	1.10625	0.0925626	1	0.760944	0
Hepatocellular-carcinoma:ebi-a-GCST90001594	0.816555	1.02604	0.825712	1.27498	0.103846	1	0.747262	0
Hepatocellular-carcinoma:ebi-a-GCST90001565	0.816717	0.969008	0.742516	1.26459	1.48634	1	0.222785	0.327206
Hepatocellular-carcinoma:ebi-a-GCST90001589	0.816874	0.963973	0.706626	1.31504	0.189344	1	0.663463	0
Hepatocellular-carcinoma:ebi-a-GCST90002080	0.820159	1.03717	0.757195	1.42066	1.2857	1	0.256843	0.222211
Hepatocellular-carcinoma:ebi-a-GCST90001790	0.820845	1.02062	0.85538	1.21777	0.183084	1	0.668736	0
Hepatocellular-carcinoma:ebi-a-GCST90001757	0.823623	1.00581	0.955887	1.05833	0.0258827	1	0.872187	0
Hepatocellular-carcinoma:ebi-a-GCST90002096	0.825471	1.01876	0.863601	1.20181	0.639921	1	0.423739	0
Hepatocellular-carcinoma:ebi-a-GCST90001743	0.827733	1.02163	0.84255	1.23877	0.148704	1	0.699777	0
Hepatocellular-carcinoma:ebi-a-GCST90001992	0.827864	1.01218	0.907558	1.12886	1.17736	1	0.277894	0.150642
Hepatocellular-carcinoma:ebi-a-GCST90001776	0.828257	1.02357	0.829323	1.2633	0.00924347	1	0.923407	0
Hepatocellular-carcinoma:ebi-a-GCST90001994	0.83054	1.01715	0.870449	1.18858	0.304032	1	0.581366	0
Hepatocellular-carcinoma:ebi-a-GCST90001460	0.830849	1.01642	0.875314	1.18028	0.136119	1	0.71217	0
Hepatocellular-carcinoma:ebi-a-GCST90001685	0.832748	0.9655	0.697006	1.33742	0.40227	1	0.52592	0
Hepatocellular-carcinoma:ebi-a-GCST90002057	0.835069	0.977113	0.785755	1.21507	0.764067	1	0.382059	0
Hepatocellular-carcinoma:ebi-a-GCST90001753	0.836459	1.01923	0.850593	1.22131	0.201358	1	0.653627	0
Hepatocellular-carcinoma:ebi-a-GCST90001765	0.838156	0.990162	0.900543	1.0887	0.0036868	1	0.951583	0
Hepatocellular-carcinoma:ebi-a-GCST90001930	0.838226	1.0237	0.81753	1.28187	1.24258	1	0.264974	0.195225
Hepatocellular-carcinoma:ebi-a-GCST90001777	0.838823	1.0146	0.882357	1.16666	0.838739	1	0.359758	0
Hepatocellular-carcinoma:ebi-a-GCST90001678	0.839534	1.01741	0.860891	1.20238	0.0188905	1	0.890681	0
Hepatocellular-carcinoma:ebi-a-GCST90001720	0.83972	0.97366	0.751736	1.2611	3.65841	1	0.0557868	0.726657
Hepatocellular-carcinoma:ebi-a-GCST90001534	0.839955	0.98178	0.821318	1.17359	0.076911	1	0.781528	0
Hepatocellular-carcinoma:ebi-a-GCST90001505	0.840895	0.975358	0.764489	1.24439	1.40525	1	0.235846	0.288383
Hepatocellular-carcinoma:ebi-a-GCST90002077	0.841572	1.02467	0.806855	1.30129	2.78253	1	0.0952976	0.640615
Hepatocellular-carcinoma:ebi-a-GCST90001798	0.842469	0.98664	0.864078	1.12659	0.0992131	1	0.752776	0
Hepatocellular-carcinoma:ebi-a-GCST90002018	0.843475	0.976731	0.773171	1.23388	1.55986	1	0.211686	0.358917
Hepatocellular-carcinoma:ebi-a-GCST90001866	0.843933	1.01943	0.841699	1.23469	4.91e-05	1	0.994407	0
Hepatocellular-carcinoma:ebi-a-GCST90001830	0.84499	1.07563	0.517912	2.23393	4.11363	1	0.0425389	0.756906
Hepatocellular-carcinoma:ebi-a-GCST90001758	0.845771	0.98701	0.865175	1.126	0.0103774	1	0.91886	0
Hepatocellular-carcinoma:ebi-a-GCST90001742	0.846725	1.02969	0.765344	1.38535	2.70754	1	0.0998749	0.630661
Hepatocellular-carcinoma:ebi-a-GCST90001966	0.849011	0.964888	0.667834	1.39407	2.56705	1	0.109111	0.610448
Hepatocellular-carcinoma:ebi-a-GCST90001449	0.849486	0.962388	0.647728	1.42991	2.91963	1	0.087508	0.657491
Hepatocellular-carcinoma:ebi-a-GCST90001993	0.849554	0.957813	0.613569	1.4952	2.04761	1	0.152445	0.511626
Hepatocellular-carcinoma:ebi-a-GCST90001907	0.849782	0.987105	0.863048	1.12899	1.44766	1	0.228904	0.309228
Hepatocellular-carcinoma:ebi-a-GCST90001766	0.851201	0.98553	0.84631	1.14765	0.10498	1	0.745933	0
Hepatocellular-carcinoma:ebi-a-GCST90001542	0.85125	0.988552	0.876465	1.11497	0.0230492	1	0.879329	0
Hepatocellular-carcinoma:ebi-a-GCST90002047	0.854618	0.978792	0.778234	1.23104	0.571754	1	0.449563	0
Hepatocellular-carcinoma:ebi-a-GCST90001919	0.854782	1.01865	0.835763	1.24156	1.14203	1	0.285223	0.12437
Hepatocellular-carcinoma:ebi-a-GCST90001592	0.854801	1.01397	0.873934	1.17645	0.0458933	1	0.83037	0
Hepatocellular-carcinoma:ebi-a-GCST90001916	0.85527	0.972839	0.723658	1.30782	0.743054	1	0.388684	0
Hepatocellular-carcinoma:ebi-a-GCST90001945	0.85572	1.02544	0.782169	1.34438	4.21189	1	0.0401415	0.762577
Hepatocellular-carcinoma:ebi-a-GCST90001951	0.855912	0.990835	0.897097	1.09437	0.0474484	1	0.827564	0
Hepatocellular-carcinoma:ebi-a-GCST90001944	0.856533	1.02523	0.782506	1.34326	4.18235	1	0.0408471	0.7609
Hepatocellular-carcinoma:ebi-a-GCST90002078	0.856742	0.977394	0.762524	1.25281	2.09967	1	0.147331	0.523734
Hepatocellular-carcinoma:ebi-a-GCST90002100	0.858825	1.0258	0.774782	1.35813	1.81235	1	0.178227	0.448229
Hepatocellular-carcinoma:ebi-a-GCST90001642	0.859419	0.970541	0.697116	1.35121	2.81294	1	0.0935067	0.6445
Hepatocellular-carcinoma:ebi-a-GCST90002027	0.859964	1.02026	0.816456	1.27494	0.648131	1	0.420782	0
Hepatocellular-carcinoma:ebi-a-GCST90002004	0.863757	1.00964	0.90488	1.12652	0.00156666	1	0.968427	0
Hepatocellular-carcinoma:ebi-a-GCST90001773	0.86786	1.0099	0.899211	1.13422	1.05226	1	0.304986	0.0496681
Hepatocellular-carcinoma:ebi-a-GCST90001419	0.868508	0.984862	0.822144	1.17978	0.0554185	1	0.81389	0
Hepatocellular-carcinoma:ebi-a-GCST90001619	0.868626	1.01431	0.857112	1.20035	2.11948	1	0.145436	0.528186
Hepatocellular-carcinoma:ebi-a-GCST90001668	0.870095	1.01399	0.858501	1.19763	3.15251	1	0.0758102	0.682793
Hepatocellular-carcinoma:ebi-a-GCST90001428	0.871656	0.98265	0.79466	1.21511	1.11521	1	0.290952	0.10331
Hepatocellular-carcinoma:ebi-a-GCST90001822	0.874957	0.986397	0.8317	1.16987	0.203968	1	0.651537	0
Hepatocellular-carcinoma:ebi-a-GCST90001799	0.876221	1.01454	0.846059	1.21656	0.0918819	1	0.761798	0
Hepatocellular-carcinoma:ebi-a-GCST90001587	0.876546	0.981548	0.776002	1.24154	0.165879	1	0.6838	0
Hepatocellular-carcinoma:ebi-a-GCST90001566	0.879747	0.974556	0.697906	1.36087	1.20532	1	0.27226	0.170347
Hepatocellular-carcinoma:ebi-a-GCST90001803	0.879855	0.960854	0.572508	1.61262	1.92281	1	0.165548	0.479927
Hepatocellular-carcinoma:ebi-a-GCST90001645	0.880597	1.02578	0.735898	1.42985	2.1508	1	0.142496	0.535056
Hepatocellular-carcinoma:ebi-a-GCST90001524	0.881695	1.01293	0.855299	1.1996	0.567128	1	0.451402	0
Hepatocellular-carcinoma:ebi-a-GCST90001438	0.885488	0.978064	0.723219	1.32271	0.0476586	1	0.827189	0
Hepatocellular-carcinoma:ebi-a-GCST90001609	0.885775	0.973323	0.673035	1.40759	0.020731	1	0.885514	0
Hepatocellular-carcinoma:ebi-a-GCST90002065	0.886507	0.983135	0.778352	1.2418	1.19963	1	0.273396	0.166408
Hepatocellular-carcinoma:ebi-a-GCST90001445	0.887729	0.966574	0.602912	1.54959	0.0636696	1	0.800787	0
Hepatocellular-carcinoma:ebi-a-GCST90002060	0.888516	0.975246	0.68693	1.38457	4.99628	1	0.0254019	0.799851
Hepatocellular-carcinoma:ebi-a-GCST90001686	0.889524	0.983385	0.776343	1.24564	0.00846592	1	0.92669	0
Hepatocellular-carcinoma:ebi-a-GCST90002021	0.891646	1.01358	0.834728	1.23077	0.139245	1	0.709033	0
Hepatocellular-carcinoma:ebi-a-GCST90001995	0.89306	1.01202	0.850233	1.20459	0.00496913	1	0.943802	0
Hepatocellular-carcinoma:ebi-a-GCST90001920	0.894442	0.98772	0.82294	1.1855	0.652777	1	0.419121	0
Hepatocellular-carcinoma:ebi-a-GCST90001784	0.895596	0.984225	0.776166	1.24806	3.28894	1	0.0697478	0.695951
Hepatocellular-carcinoma:ebi-a-GCST90001513	0.897514	1.0122	0.841682	1.21726	0.635606	1	0.425306	0
Hepatocellular-carcinoma:ebi-a-GCST90001828	0.898726	1.00989	0.867835	1.1752	0.147077	1	0.701345	0
Hepatocellular-carcinoma:ebi-a-GCST90002012	0.903193	1.01036	0.855771	1.19287	0.331803	1	0.564599	0
Hepatocellular-carcinoma:ebi-a-GCST90001591	0.90429	1.0164	0.77965	1.32505	0.248646	1	0.61803	0
Hepatocellular-carcinoma:ebi-a-GCST90001924	0.904853	1.01814	0.758174	1.36725	2.62346	1	0.105294	0.618824
Hepatocellular-carcinoma:ebi-a-GCST90001393	0.904952	1.02221	0.712738	1.46606	0.0187409	1	0.891112	0
Hepatocellular-carcinoma:ebi-a-GCST90001671	0.90533	1.01582	0.784287	1.31571	1.72419	1	0.189155	0.420017
Hepatocellular-carcinoma:ebi-a-GCST90001556	0.905703	1.01345	0.812456	1.26417	1.9868	1	0.158676	0.496677
Hepatocellular-carcinoma:ebi-a-GCST90002002	0.907143	0.982876	0.735276	1.31385	0.919802	1	0.337527	0
Hepatocellular-carcinoma:ebi-a-GCST90001628	0.908339	1.00638	0.903103	1.12147	0.666564	1	0.414252	0
Hepatocellular-carcinoma:ebi-a-GCST90001644	0.908563	0.991486	0.856871	1.14725	0.0229058	1	0.879702	0
Hepatocellular-carcinoma:ebi-a-GCST90001637	0.911065	1.011	0.834378	1.22502	0.156753	1	0.692164	0
Hepatocellular-carcinoma:ebi-a-GCST90001611	0.912523	1.01941	0.72344	1.43646	0.531627	1	0.465924	0
Hepatocellular-carcinoma:ebi-a-GCST90001450	0.913755	1.00879	0.860958	1.18202	0.94523	1	0.330936	0
Hepatocellular-carcinoma:ebi-a-GCST90001688	0.915976	0.998122	0.963876	1.03359	2.36705	1	0.123921	0.577532
Hepatocellular-carcinoma:ebi-a-GCST90001413	0.91645	1.01178	0.81293	1.25927	2.24682	1	0.133889	0.554927
Hepatocellular-carcinoma:ebi-a-GCST90001835	0.919193	1.01219	0.80089	1.27925	9.21e-05	1	0.992343	0
Hepatocellular-carcinoma:ebi-a-GCST90001399	0.919615	1.01282	0.790782	1.29721	0.000619864	1	0.980137	0
Hepatocellular-carcinoma:ebi-a-GCST90001502	0.919742	0.996936	0.939161	1.05826	0.880979	1	0.347934	0
Hepatocellular-carcinoma:ebi-a-GCST90002074	0.922333	0.992081	0.845533	1.16403	0.0928981	1	0.760525	0
Hepatocellular-carcinoma:ebi-a-GCST90001569	0.922677	1.01513	0.749657	1.3746	1.53845	1	0.214849	0.349993
Hepatocellular-carcinoma:ebi-a-GCST90002003	0.923151	1.02229	0.653266	1.59976	2.5713	1	0.108818	0.611092
Hepatocellular-carcinoma:ebi-a-GCST90001818	0.923193	1.02307	0.643498	1.62653	0.306218	1	0.58001	0
Hepatocellular-carcinoma:ebi-a-GCST90001627	0.925478	0.993527	0.867136	1.13834	0.00654511	1	0.93552	0
Hepatocellular-carcinoma:ebi-a-GCST90001531	0.925641	0.99678	0.931505	1.06663	0.00924421	1	0.923404	0
Hepatocellular-carcinoma:ebi-a-GCST90001726	0.925669	0.988636	0.777606	1.25694	1.40614	1	0.235699	0.288831
Hepatocellular-carcinoma:ebi-a-GCST90002116	0.930069	1.00657	0.869598	1.16512	1.21737	1	0.269878	0.178557
Hepatocellular-carcinoma:ebi-a-GCST90001991	0.930433	1.00581	0.883198	1.14544	0.434759	1	0.509663	0
Hepatocellular-carcinoma:ebi-a-GCST90001610	0.931066	0.985706	0.711348	1.36588	0.296921	1	0.585819	0
Hepatocellular-carcinoma:ebi-a-GCST90001873	0.931594	1.00762	0.84719	1.19844	1.0313	1	0.309854	0.0303483
Hepatocellular-carcinoma:ebi-a-GCST90002110	0.934156	1.00843	0.826383	1.23057	3.2588	1	0.0710412	0.693138
Hepatocellular-carcinoma:ebi-a-GCST90001433	0.939372	0.991763	0.801393	1.22736	0.0412319	1	0.839091	0
Hepatocellular-carcinoma:ebi-a-GCST90001983	0.942172	1.01095	0.753194	1.35692	0.0120136	1	0.912721	0
Hepatocellular-carcinoma:ebi-a-GCST90001625	0.942802	0.989354	0.738543	1.32534	0.267466	1	0.605036	0
Hepatocellular-carcinoma:ebi-a-GCST90002071	0.945587	1.00574	0.853354	1.18533	1.45679	1	0.227441	0.31356
Hepatocellular-carcinoma:ebi-a-GCST90001980	0.946955	0.995905	0.882508	1.12387	0.341486	1	0.558973	0
Hepatocellular-carcinoma:ebi-a-GCST90001689	0.947263	1.00269	0.925916	1.08583	1.49936	1	0.22077	0.333048
Hepatocellular-carcinoma:ebi-a-GCST90001486	0.949894	1.00471	0.867666	1.16341	0.0131195	1	0.90881	0
Hepatocellular-carcinoma:ebi-a-GCST90001648	0.951758	1.00676	0.809411	1.25222	0.994455	1	0.318656	0
Hepatocellular-carcinoma:ebi-a-GCST90001946	0.953712	0.997429	0.914399	1.088	0.426964	1	0.513482	0
Hepatocellular-carcinoma:ebi-a-GCST90001622	0.954764	1.00661	0.801749	1.26381	1.28259	1	0.257418	0.220328
Hepatocellular-carcinoma:ebi-a-GCST90002086	0.956596	0.993335	0.780737	1.26382	0.510063	1	0.475112	0
Hepatocellular-carcinoma:ebi-a-GCST90001639	0.958427	0.993012	0.762864	1.29259	0.0947491	1	0.758224	0
Hepatocellular-carcinoma:ebi-a-GCST90002115	0.958924	1.00788	0.747495	1.35898	1.33442	1	0.24802	0.250612
Hepatocellular-carcinoma:ebi-a-GCST90001424	0.961303	0.997413	0.898312	1.10745	0.00378214	1	0.950962	0
Hepatocellular-carcinoma:ebi-a-GCST90001859	0.962992	0.997193	0.885542	1.12292	0.0167683	1	0.896968	0
Hepatocellular-carcinoma:ebi-a-GCST90001690	0.963503	1.00125	0.949229	1.05611	1.20858	1	0.271614	0.17258
Hepatocellular-carcinoma:ebi-a-GCST90001903	0.964953	0.995521	0.814883	1.2162	0.0096265	1	0.921841	0
Hepatocellular-carcinoma:ebi-a-GCST90001781	0.965002	0.997247	0.881693	1.12795	0.0608119	1	0.805217	0
Hepatocellular-carcinoma:ebi-a-GCST90002013	0.966749	1.00264	0.885653	1.13508	0.106256	1	0.744448	0
Hepatocellular-carcinoma:ebi-a-GCST90002114	0.968529	0.992338	0.677204	1.45412	1.1984	1	0.273642	0.165553
Hepatocellular-carcinoma:ebi-a-GCST90002104	0.969469	0.997934	0.897655	1.10942	9.76e-05	1	0.992116	0
Hepatocellular-carcinoma:ebi-a-GCST90001630	0.970056	1.00448	0.795318	1.26865	0.696928	1	0.403818	0
Hepatocellular-carcinoma:ebi-a-GCST90001478	0.970138	1.00308	0.853742	1.17855	0.00135328	1	0.970655	0
Hepatocellular-carcinoma:ebi-a-GCST90002102	0.97107	1.00157	0.919936	1.09046	0.0435617	1	0.834671	0
Hepatocellular-carcinoma:ebi-a-GCST90002103	0.971559	1.00542	0.746918	1.35339	1.30724	1	0.252895	0.235029
Hepatocellular-carcinoma:ebi-a-GCST90001767	0.972877	1.00282	0.852491	1.17966	0.0368765	1	0.847717	0
Hepatocellular-carcinoma:ebi-a-GCST90001653	0.973186	0.997438	0.858856	1.15838	0.0960382	1	0.756637	0
Hepatocellular-carcinoma:ebi-a-GCST90001656	0.973186	1.00257	0.863274	1.16434	0.0960382	1	0.756637	0
Hepatocellular-carcinoma:ebi-a-GCST90001862	0.973713	0.996102	0.789618	1.25658	0.0104335	1	0.918642	0
Hepatocellular-carcinoma:ebi-a-GCST90001976	0.974711	1.00987	0.550366	1.853	2.58077	1	0.108169	0.612518
Hepatocellular-carcinoma:ebi-a-GCST90001500	0.975394	0.997846	0.870075	1.14438	0.390262	1	0.532162	0
Hepatocellular-carcinoma:ebi-a-GCST90001595	0.977801	1.01144	0.453792	2.25438	2.49937	1	0.113892	0.599899
Hepatocellular-carcinoma:ebi-a-GCST90001481	0.979825	0.99911	0.932514	1.07046	0.0597216	1	0.806937	0
Hepatocellular-carcinoma:ebi-a-GCST90001497	0.979918	1.00155	0.887933	1.1297	0.119145	1	0.729964	0
Hepatocellular-carcinoma:ebi-a-GCST90001977	0.980926	1.00324	0.769688	1.30765	0.173989	1	0.676591	0
Hepatocellular-carcinoma:ebi-a-GCST90002073	0.981103	0.998179	0.858453	1.16065	1.12136	1	0.289625	0.108228
Hepatocellular-carcinoma:ebi-a-GCST90002058	0.981151	1.00232	0.827353	1.21428	0.0322747	1	0.857426	0
Hepatocellular-carcinoma:ebi-a-GCST90001621	0.981604	1.00175	0.86343	1.16223	0.771254	1	0.379829	0
Hepatocellular-carcinoma:ebi-a-GCST90001538	0.981799	1.00127	0.897646	1.11686	1.23986	1	0.265498	0.193459
Hepatocellular-carcinoma:ebi-a-GCST90001558	0.982356	0.998145	0.846698	1.17668	0.0589738	1	0.808125	0
Hepatocellular-carcinoma:ebi-a-GCST90001666	0.984048	0.99962	0.96308	1.03755	0.0443181	1	0.833263	0
Hepatocellular-carcinoma:ebi-a-GCST90001733	0.98424	1.00241	0.789347	1.27299	0.0852597	1	0.770292	0
Hepatocellular-carcinoma:ebi-a-GCST90001568	0.9862	1.0025	0.75506	1.33104	0.33154	1	0.564754	0
Hepatocellular-carcinoma:ebi-a-GCST90001762	0.986658	0.99909	0.897988	1.11158	0.0398047	1	0.841863	0
Hepatocellular-carcinoma:ebi-a-GCST90001804	0.988589	0.998997	0.870681	1.14622	0.00250668	1	0.960069	0
Hepatocellular-carcinoma:ebi-a-GCST90001851	0.991299	0.999346	0.888521	1.12399	0.291104	1	0.589514	0
Hepatocellular-carcinoma:ebi-a-GCST90001603	0.991516	1.0015	0.759252	1.32105	0.231767	1	0.630217	0
Hepatocellular-carcinoma:ebi-a-GCST90002105	0.992479	1.0005	0.901083	1.11089	0.0791661	1	0.778431	0
Hepatocellular-carcinoma:ebi-a-GCST90001459	0.99272	0.999125	0.827806	1.2059	0.0127191	1	0.910206	0
Hepatocellular-carcinoma:ebi-a-GCST90001908	0.993267	1.00088	0.816692	1.2266	0.226062	1	0.634459	0
Hepatocellular-carcinoma:ebi-a-GCST90001414	0.993722	0.999134	0.805183	1.2398	2.83e-06	1	0.998658	0
Hepatocellular-carcinoma:ebi-a-GCST90001898	0.99494	0.998863	0.702731	1.41979	3.71925	1	0.0537887	0.731128
Hepatocellular-carcinoma:ebi-a-GCST90001577	0.995437	0.999394	0.811812	1.23032	0.623682	1	0.429682	0
Hepatocellular-carcinoma:ebi-a-GCST90001624	0.999348	1.00019	0.637724	1.56867	5.06617	1	0.0243973	0.802612

## Sheet: S9.2.
The casual effect estimated after meta-analysis of peripheral blood immune factors phenotypes to HCC.
id	Random_p-value	Random_OR	Random_95lci	Random_95uci	Q	df.Q	p-value.Q	I2
Hepatocellular-carcinoma:GCST90274791	0.0419154	1.38006	1.01185	1.88226	0.592327	1	0.441521	0
Hepatocellular-carcinoma:GCST90274823	0.11493	0.72105	0.480146	1.08282	0.342941	1	0.558137	0
Hepatocellular-carcinoma:GCST90274795	0.115696	0.764475	0.547069	1.06828	0.0621207	1	0.803175	0
Hepatocellular-carcinoma:GCST90274764	0.141929	0.766762	0.537942	1.09291	0.000385845	1	0.984328	0
Hepatocellular-carcinoma:GCST90274760	0.169046	1.42842	0.859337	2.37438	1.1518	1	0.283172	0.131796
Hepatocellular-carcinoma:GCST90274781	0.170866	0.778772	0.544494	1.11385	0.00519949	1	0.942516	0
Hepatocellular-carcinoma:GCST90274813	0.171058	1.42615	0.857869	2.37087	0.982697	1	0.321534	0
Hepatocellular-carcinoma:GCST90274836	0.183366	0.821615	0.615124	1.09742	1.01089	1	0.314689	0.0107761
Hepatocellular-carcinoma:GCST90274843	0.187338	1.17144	0.925905	1.48209	0.0363663	1	0.848761	0
Hepatocellular-carcinoma:GCST90274818	0.203312	1.26493	0.880681	1.81682	0.107571	1	0.742927	0
Hepatocellular-carcinoma:GCST90274816	0.248937	1.43702	0.775855	2.6616	0.926466	1	0.335783	0
Hepatocellular-carcinoma:GCST90274775	0.263248	1.29555	0.823081	2.03923	1.38542	1	0.239179	0.2782
Hepatocellular-carcinoma:GCST90274793	0.276969	1.30977	0.805214	2.13048	0.0517702	1	0.820011	0
Hepatocellular-carcinoma:GCST90274786	0.281812	0.804651	0.54164	1.19538	0.0558292	1	0.813214	0
Hepatocellular-carcinoma:GCST90274763	0.298353	1.42637	0.730402	2.78548	0.000330822	1	0.985488	0
Hepatocellular-carcinoma:GCST90274821	0.315891	0.86087	0.642378	1.15368	0.425991	1	0.513963	0
Hepatocellular-carcinoma:GCST90274832	0.318481	0.782428	0.483162	1.26705	0.354803	1	0.551407	0
Hepatocellular-carcinoma:GCST90274766	0.32489	1.24128	0.807208	1.90876	0.293237	1	0.588153	0
Hepatocellular-carcinoma:GCST90274822	0.356956	1.09757	0.900339	1.33801	2.52796	1	0.111845	0.604424
Hepatocellular-carcinoma:GCST90274777	0.361483	0.950675	0.852804	1.05978	0.00256906	1	0.959576	0
Hepatocellular-carcinoma:GCST90274779	0.366482	0.819011	0.531008	1.26322	0.000966023	1	0.975205	0
Hepatocellular-carcinoma:GCST90274829	0.367414	0.761169	0.420492	1.37786	1.26565	1	0.260584	0.209894
Hepatocellular-carcinoma:GCST90274758	0.369601	1.24465	0.771643	2.00762	0.13121	1	0.717181	0
Hepatocellular-carcinoma:GCST90274762	0.379984	0.764789	0.42029	1.39166	1.2765	1	0.258551	0.216608
Hepatocellular-carcinoma:GCST90274837	0.386648	0.77049	0.426981	1.39035	0.326757	1	0.567575	0
Hepatocellular-carcinoma:GCST90274848	0.408174	1.13053	0.845323	1.51196	0.770683	1	0.380006	0
Hepatocellular-carcinoma:GCST90274783	0.418486	1.10991	0.862133	1.42891	0.0159131	1	0.899615	0
Hepatocellular-carcinoma:GCST90274820	0.431922	1.15168	0.809803	1.63788	0.00402402	1	0.94942	0
Hepatocellular-carcinoma:GCST90274794	0.433944	0.828299	0.516722	1.32775	0.259202	1	0.610669	0
Hepatocellular-carcinoma:GCST90274814	0.437239	0.726212	0.323995	1.62775	2.57481	1	0.108577	0.611622
Hepatocellular-carcinoma:GCST90274830	0.438127	1.18076	0.775803	1.79709	0.115456	1	0.734016	0
Hepatocellular-carcinoma:GCST90274807	0.454555	0.737681	0.332335	1.63743	2.32305	1	0.12747	0.569531
Hepatocellular-carcinoma:GCST90274808	0.461225	1.28392	0.660429	2.49604	0.0641473	1	0.800057	0
Hepatocellular-carcinoma:GCST90274842	0.465572	1.12868	0.815395	1.56233	0.615707	1	0.432647	0
Hepatocellular-carcinoma:GCST90274768	0.481776	0.954142	0.837163	1.08747	1.38833	1	0.238687	0.279712
Hepatocellular-carcinoma:GCST90274839	0.489373	1.17948	0.738642	1.88343	0.0077316	1	0.929933	0
Hepatocellular-carcinoma:GCST90274770	0.490318	1.07676	0.872681	1.32857	0.0415337	1	0.838511	0
Hepatocellular-carcinoma:GCST90274796	0.493541	1.42109	0.519678	3.88604	3.63949	1	0.0564243	0.725236
Hepatocellular-carcinoma:GCST90274840	0.501848	0.922045	0.727587	1.16848	0.453432	1	0.50071	0
Hepatocellular-carcinoma:GCST90274846	0.532495	0.880443	0.59029	1.31322	1.33037	1	0.248739	0.248329
Hepatocellular-carcinoma:GCST90274834	0.533924	1.17475	0.707221	1.95134	0.398949	1	0.527632	0
Hepatocellular-carcinoma:GCST90274788	0.540909	1.12374	0.773138	1.63333	0.142388	1	0.705918	0
Hepatocellular-carcinoma:GCST90274798	0.54536	0.967203	0.868118	1.0776	0.392918	1	0.530769	0
Hepatocellular-carcinoma:GCST90274801	0.545492	1.17941	0.690744	2.01378	0.0535792	1	0.816948	0
Hepatocellular-carcinoma:GCST90274773	0.549401	0.870438	0.552642	1.37098	0.128933	1	0.719541	0
Hepatocellular-carcinoma:GCST90274809	0.555833	1.21013	0.641531	2.28269	0.46099	1	0.497162	0
Hepatocellular-carcinoma:GCST90274789	0.556346	1.22797	0.619493	2.43412	0.21525	1	0.642683	0
Hepatocellular-carcinoma:GCST90274811	0.578079	0.872358	0.539149	1.4115	0.029823	1	0.862893	0
Hepatocellular-carcinoma:GCST90274782	0.579078	1.1209	0.748925	1.67763	0.114429	1	0.735157	0
Hepatocellular-carcinoma:GCST90274819	0.606187	0.856489	0.475267	1.5435	0.378317	1	0.538506	0
Hepatocellular-carcinoma:GCST90274812	0.61444	0.869302	0.504077	1.49915	0.156094	1	0.692778	0
Hepatocellular-carcinoma:GCST90274802	0.626436	1.26268	0.49365	3.22975	3.41561	1	0.0645827	0.707226
Hepatocellular-carcinoma:GCST90274841	0.628672	0.915153	0.6389	1.31086	0.0530847	1	0.81778	0
Hepatocellular-carcinoma:GCST90274800	0.642054	0.944703	0.743237	1.20078	0.0169618	1	0.896378	0
Hepatocellular-carcinoma:GCST90274833	0.654013	0.934615	0.695358	1.25619	0.872074	1	0.350382	0
Hepatocellular-carcinoma:GCST90274778	0.659299	1.0983	0.723919	1.6663	0.346127	1	0.556314	0
Hepatocellular-carcinoma:GCST90274769	0.683274	1.0942	0.710036	1.68622	0.00862933	1	0.925988	0
Hepatocellular-carcinoma:GCST90274765	0.734359	0.892812	0.463823	1.71857	2.28788	1	0.130388	0.562914
Hepatocellular-carcinoma:GCST90274799	0.735477	1.0806	0.689223	1.69423	0.182401	1	0.669318	0
Hepatocellular-carcinoma:GCST90274847	0.740551	1.13042	0.547147	2.33549	3.72789	1	0.053511	0.731752
Hepatocellular-carcinoma:GCST90274780	0.749774	0.946015	0.672642	1.33049	0.110436	1	0.739648	0
Hepatocellular-carcinoma:GCST90274828	0.757682	0.925216	0.564671	1.51597	0.676226	1	0.410889	0
Hepatocellular-carcinoma:GCST90274815	0.776204	0.930741	0.567429	1.52667	0.46133	1	0.497003	0
Hepatocellular-carcinoma:GCST90274827	0.777372	1.04588	0.76638	1.42731	0.61648	1	0.432358	0
Hepatocellular-carcinoma:GCST90274825	0.778695	0.960665	0.726138	1.27094	0.370406	1	0.542783	0
Hepatocellular-carcinoma:GCST90274772	0.78171	0.961583	0.728863	1.26861	0.452304	1	0.501243	0
Hepatocellular-carcinoma:GCST90274784	0.782614	0.949646	0.657917	1.37073	0.30352	1	0.581684	0
Hepatocellular-carcinoma:GCST90274838	0.795643	0.921791	0.497716	1.7072	0.633127	1	0.426211	0
Hepatocellular-carcinoma:GCST90274771	0.796344	1.04622	0.74233	1.47452	0.840998	1	0.359112	0
Hepatocellular-carcinoma:GCST90274776	0.796976	1.06091	0.676174	1.66454	0.296792	1	0.585901	0
Hepatocellular-carcinoma:GCST90274774	0.807185	0.986725	0.886311	1.09851	0.518662	1	0.471413	0
Hepatocellular-carcinoma:GCST90274817	0.85177	1.0407	0.684864	1.58141	0.422955	1	0.515466	0
Hepatocellular-carcinoma:GCST90274797	0.856358	1.02616	0.775885	1.35715	0.201021	1	0.653898	0
Hepatocellular-carcinoma:GCST90274810	0.86152	0.938166	0.45795	1.92195	0.0689968	1	0.792803	0
Hepatocellular-carcinoma:GCST90274824	0.863872	1.03007	0.734144	1.44528	0.0245064	1	0.875603	0
Hepatocellular-carcinoma:GCST90274826	0.874327	0.966571	0.634235	1.47305	0.280506	1	0.596369	0
Hepatocellular-carcinoma:GCST90274767	0.884999	1.0279	0.70799	1.49235	1.13249	1	0.287245	0.116988
Hepatocellular-carcinoma:GCST90274787	0.886862	1.02506	0.728917	1.44151	0.00835308	1	0.927179	0
Hepatocellular-carcinoma:GCST90274845	0.891943	0.964878	0.576029	1.61622	0.042878	1	0.835955	0
Hepatocellular-carcinoma:GCST90274785	0.905126	1.08512	0.283202	4.15772	6.6304	1	0.0100253	0.849179
Hepatocellular-carcinoma:GCST90274844	0.906376	1.01576	0.782764	1.31811	0.942051	1	0.331751	0
Hepatocellular-carcinoma:GCST90274761	0.908104	1.07673	0.306864	3.77805	3.18336	1	0.0743916	0.685867
Hepatocellular-carcinoma:GCST90274835	0.90839	1.01931	0.735969	1.41172	0.0033308	1	0.953977	0
Hepatocellular-carcinoma:GCST90274831	0.90997	1.02655	0.651775	1.61684	0.175528	1	0.675245	0
Hepatocellular-carcinoma:GCST90274805	0.913174	1.06118	0.364957	3.08556	4.421	1	0.0354993	0.773807
Hepatocellular-carcinoma:GCST90274790	0.913179	0.994254	0.896419	1.10277	0.0160588	1	0.899159	0
Hepatocellular-carcinoma:GCST90274804	0.918813	1.00984	0.836549	1.21902	0.598851	1	0.439017	0
Hepatocellular-carcinoma:GCST90274803	0.959594	1.00926	0.706587	1.44158	0.357564	1	0.549862	0
Hepatocellular-carcinoma:GCST90274759	0.970462	1.00515	0.765801	1.31931	3.68816	1	0.0548002	0.728862
Hepatocellular-carcinoma:GCST90274806	0.97465	0.992799	0.635749	1.55038	0.00583528	1	0.93911	0
Hepatocellular-carcinoma:GCST90274792	0.993871	0.998219	0.633468	1.57299	0.0338782	1	0.853966	0

## Sheet: S9.3.
The casual effect estimated after meta-analysis of peripheral blood metabolites to HCC.
id	Random_p-value	Random_OR	Random_95lci	Random_95uci	Q	df.Q	p-value.Q	I2
Hepatocellular-carcinoma:GCST90200318	0.00227928	1.66053	1.19886	2.29999	0.589858	1	0.442474	0
Hepatocellular-carcinoma:GCST90200322	0.00276838	1.57523	1.16973	2.12129	0.335835	1	0.562243	0
Hepatocellular-carcinoma:GCST90200139	0.00441042	1.4147	1.11417	1.79631	1.13642	1	0.286409	0.120046
Hepatocellular-carcinoma:GCST90200243	0.00644814	0.685102	0.521893	0.89935	0.264617	1	0.606966	0
Hepatocellular-carcinoma:GCST90200209	0.00690607	1.58518	1.13478	2.21434	0.100257	1	0.751521	0
Hepatocellular-carcinoma:GCST90200522	0.00816714	0.548642	0.351647	0.855996	0.690104	1	0.406129	0
Hepatocellular-carcinoma:GCST90200795	0.00835973	0.760197	0.620054	0.932013	0.0202839	1	0.886747	0
Hepatocellular-carcinoma:GCST90200150	0.00841191	1.30247	1.07005	1.58537	0.213164	1	0.644299	0
Hepatocellular-carcinoma:GCST90200046	0.00970371	1.39995	1.08488	1.80652	0.160618	1	0.688588	0
Hepatocellular-carcinoma:GCST90200578	0.0103744	0.700349	0.533371	0.919603	0.325306	1	0.568436	0
Hepatocellular-carcinoma:GCST90200879	0.0109205	1.77371	1.14085	2.75763	0.000226495	1	0.987992	0
Hepatocellular-carcinoma:GCST90200032	0.0109671	1.97167	1.16859	3.32662	0.584275	1	0.444642	0
Hepatocellular-carcinoma:GCST90199676	0.0124231	1.57727	1.10343	2.25458	0.391473	1	0.531526	0
Hepatocellular-carcinoma:GCST90200474	0.0138312	1.38927	1.0693	1.80499	0.337352	1	0.561361	0
Hepatocellular-carcinoma:GCST90200315	0.0144347	0.545431	0.335593	0.886474	0.185167	1	0.66697	0
Hepatocellular-carcinoma:GCST90200075	0.0177986	0.468565	0.250308	0.877131	2.44921	1	0.117584	0.591705
Hepatocellular-carcinoma:GCST90200142	0.0180266	0.709616	0.534029	0.942936	0.0245956	1	0.875379	0
Hepatocellular-carcinoma:GCST90200624	0.0182207	1.49639	1.07088	2.09097	0.379617	1	0.537808	0
Hepatocellular-carcinoma:GCST90200069	0.0200718	0.66484	0.471269	0.93792	0.253437	1	0.614666	0
Hepatocellular-carcinoma:GCST90200147	0.0205493	1.41037	1.0543	1.88668	0.133622	1	0.714706	0
Hepatocellular-carcinoma:GCST90200040	0.0213038	0.63864	0.436001	0.935458	0.782852	1	0.37627	0
Hepatocellular-carcinoma:GCST90200420	0.0216802	2.09443	1.11425	3.93687	0.74863	1	0.38691	0
Hepatocellular-carcinoma:GCST90200114	0.0219141	0.600805	0.388605	0.928876	0.0166769	1	0.897248	0
Hepatocellular-carcinoma:GCST90199709	0.0233429	1.54436	1.06077	2.24843	0.248159	1	0.618375	0
Hepatocellular-carcinoma:GCST90199899	0.0243626	1.52942	1.05653	2.21395	0.0242064	1	0.876361	0
Hepatocellular-carcinoma:GCST90200254	0.0255409	0.520928	0.2939	0.923328	0.200965	1	0.653943	0
Hepatocellular-carcinoma:GCST90199787	0.0267945	1.67584	1.06114	2.64661	0.177093	1	0.673883	0
Hepatocellular-carcinoma:GCST90200076	0.0273	0.687395	0.492774	0.958881	0.324562	1	0.568879	0
Hepatocellular-carcinoma:GCST90200914	0.0299641	0.495667	0.262999	0.934169	1.74248	1	0.186824	0.426107
Hepatocellular-carcinoma:GCST90200640	0.030149	0.687264	0.48965	0.964633	0.056743	1	0.81172	0
Hepatocellular-carcinoma:GCST90200330	0.0310833	0.739401	0.561931	0.972921	0.013855	1	0.9063	0
Hepatocellular-carcinoma:GCST90200445	0.0318696	1.19057	1.01524	1.39618	0.0389585	1	0.843531	0
Hepatocellular-carcinoma:GCST90200029	0.0320692	0.553778	0.322592	0.950644	1.57637	1	0.209285	0.365629
Hepatocellular-carcinoma:GCST90200068	0.0325165	0.6987	0.502977	0.970585	0.998767	1	0.317609	0
Hepatocellular-carcinoma:GCST90200037	0.0330118	0.544704	0.311605	0.952176	2.3947	1	0.121747	0.582412
Hepatocellular-carcinoma:GCST90200744	0.0339327	0.633782	0.415821	0.965992	0.0807134	1	0.776333	0
Hepatocellular-carcinoma:GCST90200712	0.0350057	0.685966	0.483194	0.97383	0.304478	1	0.581089	0
Hepatocellular-carcinoma:GCST90199793	0.036016	0.773709	0.608729	0.983402	0.0549426	1	0.814676	0
Hepatocellular-carcinoma:GCST90200986	0.0360266	0.754353	0.579602	0.981793	0.426578	1	0.513673	0
Hepatocellular-carcinoma:GCST90200307	0.0377656	1.45217	1.02131	2.0648	1.07642	1	0.2995	0.0709952
Hepatocellular-carcinoma:GCST90200041	0.0387134	1.38369	1.01699	1.88261	0.141053	1	0.707236	0
Hepatocellular-carcinoma:GCST90200140	0.0399571	0.694541	0.49052	0.983419	1.09907	1	0.294471	0.0901373
Hepatocellular-carcinoma:GCST90199683	0.0442438	0.710111	0.508723	0.991223	0.666139	1	0.414401	0
Hepatocellular-carcinoma:GCST90200411	0.0454155	1.51964	1.00857	2.28969	0.0179802	1	0.893331	0
Hepatocellular-carcinoma:GCST90199725	0.0464052	1.30899	1.0043	1.70612	0.50482	1	0.47739	0
Hepatocellular-carcinoma:GCST90200782	0.0465746	0.639413	0.411632	0.99324	0.399974	1	0.527103	0
Hepatocellular-carcinoma:GCST90199893	0.0513181	1.24817	0.998732	1.55992	0.0139848	1	0.905864	0
Hepatocellular-carcinoma:GCST90200030	0.0520604	0.734386	0.537839	1.00276	0.049796	1	0.823419	0
Hepatocellular-carcinoma:GCST90199702	0.0524204	1.59244	0.995143	2.54824	0.176948	1	0.674009	0
Hepatocellular-carcinoma:GCST90199801	0.0525485	1.72135	0.994036	2.98083	0.899425	1	0.342936	0
Hepatocellular-carcinoma:GCST90200401	0.0541163	1.41121	0.993927	2.00369	0.0243175	1	0.87608	0
Hepatocellular-carcinoma:GCST90199866	0.0542155	0.838385	0.70065	1.0032	0.000622919	1	0.980088	0
Hepatocellular-carcinoma:GCST90199946	0.0561812	1.46292	0.990022	2.16171	0.0120993	1	0.912412	0
Hepatocellular-carcinoma:GCST90199912	0.0564205	0.750969	0.559554	1.00787	0.944144	1	0.331214	0
Hepatocellular-carcinoma:GCST90200391	0.0574551	0.603975	0.35901	1.01609	0.293281	1	0.588126	0
Hepatocellular-carcinoma:GCST90199876	0.0575694	0.703445	0.489275	1.01136	0.471443	1	0.492324	0
Hepatocellular-carcinoma:GCST90200369	0.0579693	1.36628	0.989515	1.8865	0.316507	1	0.573714	0
Hepatocellular-carcinoma:GCST90200883	0.0586921	0.698526	0.481548	1.01327	0.628752	1	0.427813	0
Hepatocellular-carcinoma:GCST90200317	0.0599221	0.694559	0.475122	1.01534	0.049735	1	0.823525	0
Hepatocellular-carcinoma:GCST90199833	0.0606448	1.25326	0.989956	1.5866	0.0201295	1	0.887176	0
Hepatocellular-carcinoma:GCST90200779	0.065287	0.695531	0.472772	1.02325	0.692458	1	0.40533	0
Hepatocellular-carcinoma:GCST90199773	0.0668749	0.650636	0.41086	1.03034	0.0116053	1	0.914211	0
Hepatocellular-carcinoma:GCST90200873	0.068712	0.640203	0.396074	1.03481	0.396959	1	0.528664	0
Hepatocellular-carcinoma:GCST90199651	0.0687823	1.53734	0.967431	2.44299	0.711213	1	0.399041	0
Hepatocellular-carcinoma:GCST90200657	0.0696286	0.728887	0.517959	1.02571	0.065473	1	0.798046	0
Hepatocellular-carcinoma:GCST90200435	0.071035	0.725258	0.511716	1.02791	0.00199409	1	0.964382	0
Hepatocellular-carcinoma:GCST90200534	0.0719913	1.56202	0.960927	2.53911	0.172054	1	0.678292	0
Hepatocellular-carcinoma:GCST90199791	0.076016	1.22779	0.978753	1.54019	0.0101254	1	0.919848	0
Hepatocellular-carcinoma:GCST90200628	0.0769447	0.745209	0.537954	1.03231	1.08844	1	0.296816	0.081257
Hepatocellular-carcinoma:GCST90200593	0.0791491	1.48538	0.954996	2.31033	1.03749	1	0.308406	0.0361358
Hepatocellular-carcinoma:GCST90199928	0.0794913	1.37039	0.963608	1.94888	0.869618	1	0.351061	0
Hepatocellular-carcinoma:GCST90200904	0.079676	1.41203	0.959992	2.07693	0.289567	1	0.590498	0
Hepatocellular-carcinoma:GCST90200409	0.0797673	0.607546	0.347916	1.06092	0.0011543	1	0.972897	0
Hepatocellular-carcinoma:GCST90200438	0.0802326	1.43619	0.957351	2.15454	0.0127636	1	0.91005	0
Hepatocellular-carcinoma:GCST90200606	0.08032	1.42861	0.95785	2.13074	0.177413	1	0.673606	0
Hepatocellular-carcinoma:GCST90200770	0.0808508	1.51864	0.950029	2.42759	0.325511	1	0.568314	0
Hepatocellular-carcinoma:GCST90200637	0.0808515	0.741054	0.529335	1.03745	0.416023	1	0.518928	0
Hepatocellular-carcinoma:GCST90200171	0.081151	0.616792	0.35834	1.06165	0.311708	1	0.576634	0
Hepatocellular-carcinoma:GCST90200392	0.0813386	1.1947	0.978097	1.45926	0.430138	1	0.511921	0
Hepatocellular-carcinoma:GCST90200929	0.0819545	0.743007	0.531657	1.03837	0.54409	1	0.460743	0
Hepatocellular-carcinoma:GCST90199649	0.0829358	1.29367	0.966987	1.73073	1.03186	1	0.309723	0.0308735
Hepatocellular-carcinoma:GCST90200963	0.0834808	0.638318	0.383942	1.06123	1.26672	1	0.260383	0.210559
Hepatocellular-carcinoma:GCST90199765	0.0843092	1.5027	0.946344	2.38614	0.00294192	1	0.956744	0
Hepatocellular-carcinoma:GCST90200878	0.0846579	0.633873	0.37752	1.0643	0.128958	1	0.719515	0
Hepatocellular-carcinoma:GCST90200062	0.0862223	1.4577	0.947753	2.24203	0.429435	1	0.512266	0
Hepatocellular-carcinoma:GCST90200493	0.0863392	0.690225	0.451842	1.05437	0.0455692	1	0.830961	0
Hepatocellular-carcinoma:GCST90200953	0.0864486	1.30886	0.962187	1.78043	0.124973	1	0.723702	0
Hepatocellular-carcinoma:GCST90200781	0.0872092	0.570425	0.299785	1.0854	0.462179	1	0.496607	0
Hepatocellular-carcinoma:GCST90200060	0.0877237	0.627349	0.367353	1.07136	0.319272	1	0.572046	0
Hepatocellular-carcinoma:GCST90200269	0.0877731	0.858656	0.720846	1.02281	0.204876	1	0.650814	0
Hepatocellular-carcinoma:GCST90199713	0.0890346	1.49732	0.940269	2.38438	0.666066	1	0.414426	0
Hepatocellular-carcinoma:GCST90200700	0.0892984	0.828367	0.66664	1.02933	0.0431948	1	0.835359	0
Hepatocellular-carcinoma:GCST90200884	0.0915053	0.775937	0.577916	1.04181	1.09623	1	0.295095	0.0877816
Hepatocellular-carcinoma:GCST90200495	0.0924236	1.66985	0.919001	3.03418	0.00609094	1	0.937793	0
Hepatocellular-carcinoma:GCST90200351	0.0934799	1.18626	0.971628	1.44829	0.108425	1	0.741944	0
Hepatocellular-carcinoma:GCST90200073	0.0946634	0.750994	0.536775	1.0507	0.0375174	1	0.846415	0
Hepatocellular-carcinoma:GCST90199648	0.0949005	0.722341	0.493137	1.05808	1.49493	1	0.221453	0.331071
Hepatocellular-carcinoma:GCST90200747	0.0951227	0.593987	0.322189	1.09507	0.757106	1	0.384236	0
Hepatocellular-carcinoma:GCST90200979	0.0952824	1.21807	0.966082	1.53578	0.000187238	1	0.989083	0
Hepatocellular-carcinoma:GCST90200058	0.0966645	1.37806	0.943968	2.01177	0.0261912	1	0.871434	0
Hepatocellular-carcinoma:GCST90199989	0.0970345	1.44692	0.935276	2.23845	0.813094	1	0.367207	0
Hepatocellular-carcinoma:GCST90199655	0.0982098	1.59294	0.917355	2.76607	0.00935813	1	0.922935	0
Hepatocellular-carcinoma:GCST90200246	0.0998441	1.35595	0.943491	1.94873	0.0468233	1	0.828686	0
Hepatocellular-carcinoma:GCST90200989	0.100352	1.33309	0.946075	1.87842	0.607388	1	0.435773	0
Hepatocellular-carcinoma:GCST90200289	0.102657	1.65744	0.903482	3.04056	0.00025718	1	0.987205	0
Hepatocellular-carcinoma:GCST90200379	0.103618	1.29146	0.949104	1.7573	0.00203957	1	0.963979	0
Hepatocellular-carcinoma:GCST90200739	0.103827	1.53228	0.916246	2.56251	0.180614	1	0.670846	0
Hepatocellular-carcinoma:GCST90200536	0.107419	1.46673	0.920087	2.33814	0.570286	1	0.450145	0
Hepatocellular-carcinoma:GCST90200349	0.10846	1.91543	0.866178	4.23568	3.94056	1	0.047135	0.746229
Hepatocellular-carcinoma:GCST90200976	0.110971	1.47851	0.914093	2.39142	1.45053	1	0.228443	0.310597
Hepatocellular-carcinoma:GCST90199643	0.111936	1.46638	0.914659	2.35091	0.86182	1	0.35323	0
Hepatocellular-carcinoma:GCST90199668	0.112323	1.20242	0.957718	1.50965	0.131726	1	0.71665	0
Hepatocellular-carcinoma:GCST90200583	0.115249	0.787762	0.585422	1.06004	0.381002	1	0.537068	0
Hepatocellular-carcinoma:GCST90200216	0.115671	1.38916	0.922371	2.09219	0.28813	1	0.591421	0
Hepatocellular-carcinoma:GCST90200375	0.115672	0.729222	0.492045	1.08072	0.0266604	1	0.870298	0
Hepatocellular-carcinoma:GCST90199918	0.115951	0.738525	0.506108	1.07767	0.390213	1	0.532188	0
Hepatocellular-carcinoma:GCST90200524	0.116883	1.40393	0.918684	2.14548	0.000367591	1	0.984703	0
Hepatocellular-carcinoma:GCST90200551	0.116941	0.671247	0.407806	1.10487	0.154454	1	0.694314	0
Hepatocellular-carcinoma:GCST90200201	0.1185	0.72956	0.49106	1.0839	0.0986476	1	0.753459	0
Hepatocellular-carcinoma:GCST90199736	0.119167	1.28596	0.937225	1.76446	0.0627913	1	0.802137	0
Hepatocellular-carcinoma:GCST90200514	0.119835	1.35629	0.923808	1.99125	0.768058	1	0.380818	0
Hepatocellular-carcinoma:GCST90200673	0.119895	0.878937	0.747016	1.03415	0.279506	1	0.597025	0
Hepatocellular-carcinoma:GCST90200778	0.120753	0.67049	0.404665	1.11093	0.416144	1	0.518868	0
Hepatocellular-carcinoma:GCST90200167	0.122216	0.701813	0.447928	1.0996	0.0397669	1	0.841937	0
Hepatocellular-carcinoma:GCST90200972	0.122254	1.44048	0.906727	2.28844	0.249521	1	0.617412	0
Hepatocellular-carcinoma:GCST90200248	0.12294	1.33902	0.924041	1.94037	0.0845527	1	0.77122	0
Hepatocellular-carcinoma:GCST90200043	0.123506	1.35865	0.919868	2.00674	0.00082311	1	0.977112	0
Hepatocellular-carcinoma:GCST90199825	0.123506	0.632457	0.353053	1.13298	0.00380861	1	0.950791	0
Hepatocellular-carcinoma:GCST90200036	0.123615	0.815334	0.628746	1.05729	0.818396	1	0.36565	0
Hepatocellular-carcinoma:GCST90200872	0.125223	0.763247	0.540345	1.0781	0.785656	1	0.375417	0
Hepatocellular-carcinoma:GCST90200472	0.128633	1.34818	0.917045	1.98202	0.427218	1	0.513357	0
Hepatocellular-carcinoma:GCST90199660	0.130783	1.26459	0.93263	1.71471	0.736751	1	0.390704	0
Hepatocellular-carcinoma:GCST90200502	0.130896	0.788856	0.5799	1.07311	1.02	1	0.312518	0.0196102
Hepatocellular-carcinoma:GCST90200722	0.133613	0.775797	0.556787	1.08095	0.229886	1	0.631609	0
Hepatocellular-carcinoma:GCST90200227	0.134132	1.48131	0.885881	2.47695	1.52818	1	0.216386	0.345627
Hepatocellular-carcinoma:GCST90200797	0.134913	0.805614	0.606818	1.06954	0.00554154	1	0.940659	0
Hepatocellular-carcinoma:GCST90200363	0.135735	0.870328	0.725171	1.04454	0.983201	1	0.32141	0
Hepatocellular-carcinoma:GCST90200991	0.137596	0.68084	0.409885	1.13091	7.9e-05	1	0.992907	0
Hepatocellular-carcinoma:GCST90200518	0.138589	1.50525	0.876134	2.58612	3.05375	1	0.0805511	0.672534
Hepatocellular-carcinoma:GCST90200327	0.139713	0.742862	0.500713	1.10212	0.00939913	1	0.922767	0
Hepatocellular-carcinoma:GCST90200252	0.139963	1.33095	0.910502	1.94555	0.572957	1	0.449086	0
Hepatocellular-carcinoma:GCST90200603	0.140679	0.778338	0.557678	1.08631	0.310777	1	0.577204	0
Hepatocellular-carcinoma:GCST90200987	0.140979	1.35658	0.903887	2.03598	0.590369	1	0.442276	0
Hepatocellular-carcinoma:GCST90200338	0.141292	0.739615	0.494845	1.10546	0.206176	1	0.649782	0
Hepatocellular-carcinoma:GCST90200625	0.141494	1.2901	0.918656	1.81174	0.00021444	1	0.988316	0
Hepatocellular-carcinoma:GCST90200431	0.141587	1.42197	0.889256	2.27382	0.966654	1	0.325516	0
Hepatocellular-carcinoma:GCST90199821	0.14196	1.33813	0.907127	1.97392	0.41253	1	0.520688	0
Hepatocellular-carcinoma:GCST90199862	0.14206	1.31558	0.912217	1.89731	0.403658	1	0.525206	0
Hepatocellular-carcinoma:GCST90200667	0.144856	0.561646	0.258616	1.21974	1.97875	1	0.159523	0.494629
Hepatocellular-carcinoma:GCST90199707	0.144962	1.35508	0.90056	2.03901	0.386905	1	0.533931	0
Hepatocellular-carcinoma:GCST90200846	0.147118	1.34935	0.899931	2.02321	0.0890494	1	0.765389	0
Hepatocellular-carcinoma:GCST90200038	0.148727	1.89043	0.79651	4.48675	2.78303	1	0.095268	0.640679
Hepatocellular-carcinoma:GCST90199751	0.149302	0.724525	0.467561	1.12271	0.00780808	1	0.929588	0
Hepatocellular-carcinoma:GCST90199626	0.149809	1.32093	0.904431	1.92924	0.0533599	1	0.817317	0
Hepatocellular-carcinoma:GCST90200570	0.150303	1.20125	0.935685	1.54219	0.150934	1	0.697644	0
Hepatocellular-carcinoma:GCST90199963	0.150863	1.21007	0.932874	1.56963	0.0146849	1	0.903548	0
Hepatocellular-carcinoma:GCST90200221	0.151763	0.764523	0.529587	1.10368	0.385307	1	0.534777	0
Hepatocellular-carcinoma:GCST90200982	0.152882	1.55627	0.848608	2.85405	0.892192	1	0.344884	0
Hepatocellular-carcinoma:GCST90199926	0.15401	1.33335	0.89775	1.98032	0.0381448	1	0.845153	0
Hepatocellular-carcinoma:GCST90200715	0.154441	1.28607	0.909656	1.81824	0.543232	1	0.461096	0
Hepatocellular-carcinoma:GCST90200451	0.154826	0.61386	0.313403	1.20236	2.20986	1	0.137131	0.547483
Hepatocellular-carcinoma:GCST90200620	0.15484	1.29569	0.906796	1.85136	0.287948	1	0.591538	0
Hepatocellular-carcinoma:GCST90200820	0.155744	0.81577	0.615841	1.08061	0.178994	1	0.672239	0
Hepatocellular-carcinoma:GCST90200122	0.156928	1.25992	0.914959	1.73494	0.00487987	1	0.944308	0
Hepatocellular-carcinoma:GCST90199638	0.156966	1.33199	0.895558	1.98109	0.324557	1	0.568882	0
Hepatocellular-carcinoma:GCST90200086	0.158601	1.32257	0.896637	1.95083	0.886782	1	0.346351	0
Hepatocellular-carcinoma:GCST90200866	0.159851	1.28851	0.904855	1.83482	0.467475	1	0.494151	0
Hepatocellular-carcinoma:GCST90200359	0.161559	1.30558	0.8988	1.89647	0.382667	1	0.53618	0
Hepatocellular-carcinoma:GCST90200285	0.161689	0.728615	0.467647	1.13521	4.79e-05	1	0.994478	0
Hepatocellular-carcinoma:GCST90199999	0.162752	1.34849	0.88619	2.05197	0.00252584	1	0.959917	0
Hepatocellular-carcinoma:GCST90200710	0.162879	0.877355	0.730069	1.05436	0.430539	1	0.511724	0
Hepatocellular-carcinoma:GCST90200705	0.165105	0.888051	0.750989	1.05013	0.194942	1	0.658835	0
Hepatocellular-carcinoma:GCST90199744	0.165214	0.699659	0.422488	1.15867	0.286107	1	0.592726	0
Hepatocellular-carcinoma:GCST90200842	0.166615	1.35543	0.880891	2.0856	0.00366055	1	0.951755	0
Hepatocellular-carcinoma:GCST90199667	0.166831	0.798484	0.58037	1.09857	0.458291	1	0.498424	0
Hepatocellular-carcinoma:GCST90200348	0.167386	0.766156	0.524921	1.11825	0.0567401	1	0.811725	0
Hepatocellular-carcinoma:GCST90200580	0.167429	1.33242	0.88651	2.00261	0.379163	1	0.538052	0
Hepatocellular-carcinoma:GCST90199838	0.16937	1.20934	0.922179	1.58592	0.259423	1	0.610517	0
Hepatocellular-carcinoma:GCST90200920	0.169582	0.787126	0.55938	1.1076	0.0729159	1	0.787138	0
Hepatocellular-carcinoma:GCST90200273	0.17075	1.56487	0.824539	2.96991	0.447204	1	0.503666	0
Hepatocellular-carcinoma:GCST90200268	0.171079	1.22172	0.917135	1.62746	0.857775	1	0.354362	0
Hepatocellular-carcinoma:GCST90199724	0.173258	1.42251	0.85659	2.3623	0.268924	1	0.604054	0
Hepatocellular-carcinoma:GCST90200466	0.173798	1.28468	0.8954	1.8432	0.327768	1	0.566977	0
Hepatocellular-carcinoma:GCST90200648	0.174054	1.26383	0.901703	1.77139	0.632946	1	0.426277	0
Hepatocellular-carcinoma:GCST90199784	0.174202	0.786853	0.55684	1.11188	0.13682	1	0.711463	0
Hepatocellular-carcinoma:GCST90200300	0.17469	0.788529	0.559524	1.11126	0.019262	1	0.889618	0
Hepatocellular-carcinoma:GCST90200103	0.176102	0.845542	0.663088	1.0782	0.496837	1	0.480893	0
Hepatocellular-carcinoma:GCST90200651	0.177562	1.12652	0.947391	1.33951	0.463878	1	0.495817	0
Hepatocellular-carcinoma:GCST90200334	0.177799	0.73806	0.474501	1.14801	0.326629	1	0.567651	0
Hepatocellular-carcinoma:GCST90200138	0.181287	1.40329	0.853898	2.30616	1.68778	1	0.193893	0.407507
Hepatocellular-carcinoma:GCST90200764	0.182351	0.806982	0.588814	1.10598	0.0578734	1	0.809889	0
Hepatocellular-carcinoma:GCST90199686	0.182474	0.693111	0.404352	1.18808	1.09736	1	0.294846	0.0887217
Hepatocellular-carcinoma:GCST90199846	0.183101	0.822196	0.616308	1.09687	0.543423	1	0.461018	0
Hepatocellular-carcinoma:GCST90200053	0.183605	1.24459	0.901493	1.71826	0.000328006	1	0.98555	0
Hepatocellular-carcinoma:GCST90199909	0.184959	0.770871	0.524667	1.13261	0.0485384	1	0.825626	0
Hepatocellular-carcinoma:GCST90200916	0.185029	0.669971	0.370543	1.21136	1.56676	1	0.210679	0.361739
Hepatocellular-carcinoma:GCST90200141	0.186194	1.25749	0.895309	1.76618	0.464787	1	0.495395	0
Hepatocellular-carcinoma:GCST90200124	0.186614	0.730765	0.458788	1.16397	0.109156	1	0.741107	0
Hepatocellular-carcinoma:GCST90199875	0.187162	0.631656	0.319162	1.25012	0.687588	1	0.406986	0
Hepatocellular-carcinoma:GCST90199802	0.187491	1.20809	0.912044	1.60022	0.220107	1	0.638959	0
Hepatocellular-carcinoma:GCST90199761	0.190219	0.758578	0.501711	1.14696	0.946384	1	0.330641	0
Hepatocellular-carcinoma:GCST90200680	0.190461	1.17877	0.9215	1.50788	0.00116858	1	0.97273	0
Hepatocellular-carcinoma:GCST90200168	0.190956	0.592115	0.269964	1.29869	2.12117	1	0.145276	0.528562
Hepatocellular-carcinoma:GCST90201009	0.191287	0.817883	0.604982	1.10571	0.365412	1	0.545516	0
Hepatocellular-carcinoma:GCST90200827	0.191823	1.52165	0.810104	2.85819	1.73528	1	0.187737	0.423726
Hepatocellular-carcinoma:GCST90200769	0.19231	1.31195	0.872274	1.97324	0.0820897	1	0.774485	0
Hepatocellular-carcinoma:GCST90200218	0.193063	1.324	0.867649	2.02037	0.0956666	1	0.757093	0
Hepatocellular-carcinoma:GCST90200079	0.194863	1.19267	0.913746	1.55675	0.808855	1	0.368459	0
Hepatocellular-carcinoma:GCST90200398	0.19536	1.36847	0.851189	2.20012	0.0444933	1	0.832939	0
Hepatocellular-carcinoma:GCST90200358	0.195516	1.20502	0.908568	1.59819	0.15441	1	0.694356	0
Hepatocellular-carcinoma:GCST90200821	0.195846	1.2156	0.904295	1.63407	0.4877	1	0.484955	0
Hepatocellular-carcinoma:GCST90199922	0.195854	0.760364	0.502036	1.15162	0.29086	1	0.58967	0
Hepatocellular-carcinoma:GCST90199786	0.197789	1.29588	0.873489	1.92253	0.196986	1	0.657165	0
Hepatocellular-carcinoma:GCST90200417	0.19807	0.89595	0.757917	1.05912	0.101243	1	0.750343	0
Hepatocellular-carcinoma:GCST90200049	0.198174	0.805358	0.579154	1.11991	0.158396	1	0.690638	0
Hepatocellular-carcinoma:GCST90199857	0.198755	0.854816	0.672928	1.08587	0.577313	1	0.447367	0
Hepatocellular-carcinoma:GCST90199699	0.199016	1.27172	0.881227	1.83525	0.0349947	1	0.851607	0
Hepatocellular-carcinoma:GCST90200123	0.199751	1.15047	0.928593	1.42537	0.000971063	1	0.97514	0
Hepatocellular-carcinoma:GCST90199697	0.200735	0.751756	0.48556	1.16389	0.238206	1	0.625505	0
Hepatocellular-carcinoma:GCST90200374	0.201316	1.28698	0.873989	1.89511	0.727006	1	0.393855	0
Hepatocellular-carcinoma:GCST90200834	0.20265	0.821163	0.60644	1.11191	0.144033	1	0.704304	0
Hepatocellular-carcinoma:GCST90200485	0.203606	1.35754	0.847412	2.17477	0.959995	1	0.327188	0
Hepatocellular-carcinoma:GCST90200249	0.205958	1.37037	0.840976	2.23302	1.42488	1	0.232602	0.298188
Hepatocellular-carcinoma:GCST90200464	0.206623	1.25313	0.882898	1.77862	0.134362	1	0.713951	0
Hepatocellular-carcinoma:GCST90199628	0.206654	1.31212	0.860742	2.00019	1.03948	1	0.307942	0.037983
Hepatocellular-carcinoma:GCST90200237	0.207217	0.787419	0.54314	1.14156	0.615017	1	0.432905	0
Hepatocellular-carcinoma:GCST90200861	0.207935	1.31434	0.858909	2.01126	1.28649	1	0.256696	0.222691
Hepatocellular-carcinoma:GCST90199719	0.208191	1.1449	0.92736	1.41347	0.504078	1	0.477714	0
Hepatocellular-carcinoma:GCST90199690	0.208652	1.41692	0.823028	2.43936	0.296198	1	0.586276	0
Hepatocellular-carcinoma:GCST90200048	0.208829	0.709412	0.415312	1.21178	1.14478	1	0.284644	0.12647
Hepatocellular-carcinoma:GCST90200824	0.209228	0.800106	0.564903	1.13324	0.495503	1	0.481483	0
Hepatocellular-carcinoma:GCST90200576	0.209511	1.19298	0.905619	1.57152	0.452716	1	0.501048	0
Hepatocellular-carcinoma:GCST90200743	0.210541	1.23491	0.88755	1.71821	0.777363	1	0.377949	0
Hepatocellular-carcinoma:GCST90199977	0.210776	1.25637	0.878783	1.7962	0.0392848	1	0.842885	0
Hepatocellular-carcinoma:GCST90200025	0.212556	1.21151	0.896012	1.63809	0.702184	1	0.402051	0
Hepatocellular-carcinoma:GCST90200203	0.213098	1.16504	0.916032	1.48173	0.782753	1	0.3763	0
Hepatocellular-carcinoma:GCST90199794	0.215385	0.807818	0.576343	1.13226	0.693318	1	0.405038	0
Hepatocellular-carcinoma:GCST90200546	0.216663	0.740378	0.459568	1.19277	0.0135857	1	0.90721	0
Hepatocellular-carcinoma:GCST90199776	0.21692	1.28597	0.862672	1.91698	0.00441308	1	0.947035	0
Hepatocellular-carcinoma:GCST90200774	0.217013	1.27879	0.865445	1.88956	0.00152501	1	0.968849	0
Hepatocellular-carcinoma:GCST90199631	0.218669	1.52584	0.778234	2.99164	0.318223	1	0.572677	0
Hepatocellular-carcinoma:GCST90200981	0.218962	1.30499	0.85366	1.99494	0.95642	1	0.328091	0
Hepatocellular-carcinoma:GCST90200146	0.219178	1.48481	0.790375	2.7894	3.42572	1	0.0641883	0.70809
Hepatocellular-carcinoma:GCST90200507	0.219603	1.23994	0.879583	1.74794	0.594153	1	0.440817	0
Hepatocellular-carcinoma:GCST90199914	0.219854	0.801993	0.563749	1.14092	1.12685	1	0.288449	0.112568
Hepatocellular-carcinoma:GCST90200004	0.220083	1.349	0.836024	2.17672	0.106551	1	0.744106	0
Hepatocellular-carcinoma:GCST90200745	0.220527	0.731656	0.443839	1.20612	0.0746614	1	0.784667	0
Hepatocellular-carcinoma:GCST90200942	0.22132	0.788512	0.538812	1.15393	0.0227445	1	0.880123	0
Hepatocellular-carcinoma:GCST90200034	0.221455	0.764318	0.496776	1.17595	0.469696	1	0.493127	0
Hepatocellular-carcinoma:GCST90200909	0.222054	1.29417	0.855526	1.95772	0.042979	1	0.835765	0
Hepatocellular-carcinoma:GCST90199672	0.22345	0.797428	0.553885	1.14806	0.07029	1	0.790915	0
Hepatocellular-carcinoma:GCST90200176	0.224743	1.63836	0.738338	3.6355	1.50901	1	0.21929	0.337315
Hepatocellular-carcinoma:GCST90199988	0.225011	1.70591	0.719874	4.04257	3.59977	1	0.0577875	0.722205
Hepatocellular-carcinoma:GCST90200790	0.226922	1.25575	0.867917	1.81688	0.133073	1	0.715267	0
Hepatocellular-carcinoma:GCST90200352	0.227109	0.750689	0.471377	1.1955	0.00459165	1	0.945975	0
Hepatocellular-carcinoma:GCST90200456	0.22727	1.22633	0.880591	1.70781	0.106283	1	0.744416	0
Hepatocellular-carcinoma:GCST90199987	0.227823	0.794404	0.546499	1.15477	0.510993	1	0.474709	0
Hepatocellular-carcinoma:GCST90200825	0.229402	0.791385	0.540365	1.15901	0.00534715	1	0.941707	0
Hepatocellular-carcinoma:GCST90200801	0.229655	1.24089	0.872564	1.76469	0.0918335	1	0.761859	0
Hepatocellular-carcinoma:GCST90200065	0.229748	1.21135	0.885888	1.65638	1.05866	1	0.303522	0.0554076
Hepatocellular-carcinoma:GCST90200669	0.230346	1.52993	0.763684	3.06498	1.68884	1	0.193754	0.407877
Hepatocellular-carcinoma:GCST90200279	0.231704	1.10827	0.936443	1.31162	0.291617	1	0.589186	0
Hepatocellular-carcinoma:GCST90200112	0.232548	0.683084	0.36536	1.27711	0.146867	1	0.701548	0
Hepatocellular-carcinoma:GCST90200560	0.233197	0.706089	0.398454	1.25124	1.48702	1	0.222679	0.327516
Hepatocellular-carcinoma:GCST90199678	0.233886	0.843059	0.636482	1.11668	0.0221928	1	0.881575	0
Hepatocellular-carcinoma:GCST90200292	0.234407	0.771731	0.503473	1.18292	0.757223	1	0.384199	0
Hepatocellular-carcinoma:GCST90199973	0.234779	0.8078	0.568056	1.14873	1.79454	1	0.180374	0.442755
Hepatocellular-carcinoma:GCST90199902	0.236277	0.708599	0.400709	1.25306	0.0211307	1	0.884423	0
Hepatocellular-carcinoma:GCST90200051	0.23647	0.832819	0.6152	1.12742	0.27905	1	0.597324	0
Hepatocellular-carcinoma:GCST90200272	0.236745	1.42169	0.793735	2.54646	0.00239816	1	0.960942	0
Hepatocellular-carcinoma:GCST90200714	0.236867	1.33354	0.827699	2.14853	0.96539	1	0.325833	0
Hepatocellular-carcinoma:GCST90200143	0.237056	1.18384	0.894952	1.56597	0.298076	1	0.585091	0
Hepatocellular-carcinoma:GCST90199968	0.238321	0.836053	0.620837	1.12588	0.0296768	1	0.863226	0
Hepatocellular-carcinoma:GCST90200443	0.240466	0.751846	0.466979	1.21049	0.249517	1	0.617415	0
Hepatocellular-carcinoma:GCST90200365	0.241105	1.25062	0.86046	1.8177	0.620703	1	0.430786	0
Hepatocellular-carcinoma:GCST90199669	0.241933	1.29745	0.838825	2.00681	0.0892337	1	0.765154	0
Hepatocellular-carcinoma:GCST90200613	0.242859	0.880991	0.71223	1.08974	0.310204	1	0.577555	0
Hepatocellular-carcinoma:GCST90200602	0.244364	1.22951	0.868278	1.74102	0.288002	1	0.591504	0
Hepatocellular-carcinoma:GCST90200293	0.244741	0.768083	0.492409	1.19809	0.437486	1	0.508338	0
Hepatocellular-carcinoma:GCST90200366	0.245716	0.798252	0.545644	1.1678	0.0419995	1	0.837621	0
Hepatocellular-carcinoma:GCST90199720	0.24612	1.16015	0.902595	1.4912	0.411618	1	0.52115	0
Hepatocellular-carcinoma:GCST90200615	0.246378	1.3173	0.826651	2.09916	0.610086	1	0.434755	0
Hepatocellular-carcinoma:GCST90200247	0.24691	1.28135	0.842204	1.94948	0.516313	1	0.472419	0
Hepatocellular-carcinoma:GCST90200144	0.247946	1.15998	0.901811	1.49206	0.205134	1	0.650608	0
Hepatocellular-carcinoma:GCST90200306	0.249467	0.779083	0.509414	1.1915	0.0692451	1	0.792439	0
Hepatocellular-carcinoma:GCST90200496	0.249664	1.24278	0.858382	1.79931	0.129995	1	0.718438	0
Hepatocellular-carcinoma:GCST90199870	0.250342	0.822357	0.589164	1.14785	0.0818267	1	0.774837	0
Hepatocellular-carcinoma:GCST90200240	0.254379	0.775949	0.501637	1.20026	0.148502	1	0.699971	0
Hepatocellular-carcinoma:GCST90200092	0.25446	1.25451	0.849392	1.85286	0.24883	1	0.6179	0
Hepatocellular-carcinoma:GCST90200527	0.255947	0.784352	0.515836	1.19264	0.200414	1	0.654387	0
Hepatocellular-carcinoma:GCST90199796	0.256463	1.33129	0.812145	2.1823	0.0293461	1	0.863982	0
Hepatocellular-carcinoma:GCST90200804	0.258604	0.768738	0.48709	1.21324	0.191052	1	0.662043	0
Hepatocellular-carcinoma:GCST90200947	0.25876	0.810251	0.562378	1.16738	0.443339	1	0.505515	0
Hepatocellular-carcinoma:GCST90200971	0.258779	0.768858	0.487217	1.2133	0.0653607	1	0.798215	0
Hepatocellular-carcinoma:GCST90200553	0.258896	0.841689	0.624042	1.13524	0.407893	1	0.523041	0
Hepatocellular-carcinoma:GCST90200332	0.259299	1.21625	0.865558	1.70904	0.144057	1	0.704281	0
Hepatocellular-carcinoma:GCST90200347	0.26075	0.582545	0.22717	1.49385	2.82591	1	0.092754	0.646132
Hepatocellular-carcinoma:GCST90200754	0.260833	1.30416	0.82092	2.07185	0.139388	1	0.708891	0
Hepatocellular-carcinoma:GCST90199795	0.262976	0.722803	0.409424	1.27605	0.072601	1	0.787587	0
Hepatocellular-carcinoma:GCST90200644	0.263139	1.23066	0.855577	1.77018	0.27203	1	0.601973	0
Hepatocellular-carcinoma:GCST90200751	0.268391	0.763338	0.473176	1.23143	0.306677	1	0.579727	0
Hepatocellular-carcinoma:GCST90200843	0.268883	0.764087	0.474231	1.23111	0.910944	1	0.339864	0
Hepatocellular-carcinoma:GCST90199877	0.269086	0.827366	0.591206	1.15786	0.563523	1	0.452844	0
Hepatocellular-carcinoma:GCST90200793	0.269636	0.841329	0.619076	1.14337	1.09354	1	0.295688	0.0855391
Hepatocellular-carcinoma:GCST90200688	0.27005	0.719692	0.401138	1.29122	2.42994	1	0.119037	0.588468
Hepatocellular-carcinoma:GCST90200437	0.272261	0.795611	0.528966	1.19667	0.0398329	1	0.841808	0
Hepatocellular-carcinoma:GCST90200658	0.272319	1.21075	0.860525	1.70352	1.51383	1	0.218556	0.339424
Hepatocellular-carcinoma:GCST90200568	0.272625	1.27235	0.827403	1.95657	0.10689	1	0.743713	0
Hepatocellular-carcinoma:GCST90200014	0.274864	1.324	0.80003	2.19112	2.86385	1	0.0905903	0.65082
Hepatocellular-carcinoma:GCST90200192	0.274972	0.830786	0.595584	1.15887	0.445763	1	0.504354	0
Hepatocellular-carcinoma:GCST90200314	0.276546	0.809906	0.553991	1.18404	0.00482751	1	0.944607	0
Hepatocellular-carcinoma:GCST90200085	0.277791	0.849244	0.632223	1.14076	0.0265946	1	0.870457	0
Hepatocellular-carcinoma:GCST90200394	0.278331	0.811255	0.5558	1.18412	0.000108253	1	0.991699	0
Hepatocellular-carcinoma:GCST90200225	0.279036	1.26808	0.824877	1.9494	0.182313	1	0.669393	0
Hepatocellular-carcinoma:GCST90200130	0.280829	1.34644	0.78416	2.31191	0.059968	1	0.806547	0
Hepatocellular-carcinoma:GCST90200367	0.281692	1.47608	0.726479	2.99913	1.61636	1	0.203601	0.381324
Hepatocellular-carcinoma:GCST90200378	0.282171	1.25145	0.83154	1.8834	0.000832132	1	0.976987	0
Hepatocellular-carcinoma:GCST90200983	0.283842	1.20808	0.854986	1.70701	0.0330848	1	0.855667	0
Hepatocellular-carcinoma:GCST90200380	0.283861	0.787169	0.508149	1.2194	0.799981	1	0.371099	0
Hepatocellular-carcinoma:GCST90200849	0.283985	0.710839	0.380725	1.32718	1.74095	1	0.187019	0.4256
Hepatocellular-carcinoma:GCST90200287	0.28454	1.25125	0.829972	1.88637	0.233754	1	0.628754	0
Hepatocellular-carcinoma:GCST90200071	0.284721	1.37476	0.767319	2.46309	1.83776	1	0.175214	0.455858
Hepatocellular-carcinoma:GCST90200479	0.284998	0.772056	0.480494	1.24054	1.38012	1	0.240081	0.275425
Hepatocellular-carcinoma:GCST90200462	0.285095	0.820569	0.571007	1.1792	0.231489	1	0.630422	0
Hepatocellular-carcinoma:GCST90200354	0.28537	0.71466	0.38586	1.32364	0.625213	1	0.429117	0
Hepatocellular-carcinoma:GCST90199898	0.287109	0.818958	0.566964	1.18295	0.259444	1	0.610502	0
Hepatocellular-carcinoma:GCST90200465	0.287479	0.880526	0.696501	1.11317	0.13656	1	0.711725	0
Hepatocellular-carcinoma:GCST90200120	0.287532	1.21704	0.847423	1.74788	0.315027	1	0.574612	0
Hepatocellular-carcinoma:GCST90200453	0.287967	1.20666	0.853298	1.70635	0.902934	1	0.341996	0
Hepatocellular-carcinoma:GCST90199659	0.290072	0.593188	0.225431	1.56089	3.54689	1	0.0596572	0.718063
Hepatocellular-carcinoma:GCST90200610	0.290887	1.28481	0.806983	2.04558	1.17809	1	0.277746	0.151165
Hepatocellular-carcinoma:GCST90200442	0.29157	1.50285	0.704931	3.20392	1.92644	1	0.165149	0.480907
Hepatocellular-carcinoma:GCST90200311	0.291965	1.17134	0.872856	1.57189	0.836653	1	0.360356	0
Hepatocellular-carcinoma:GCST90199816	0.292187	0.782273	0.495369	1.23535	0.0709606	1	0.789943	0
Hepatocellular-carcinoma:GCST90200194	0.292883	0.657032	0.300384	1.43713	0.0325931	1	0.856732	0
Hepatocellular-carcinoma:GCST90200196	0.293135	1.28326	0.806076	2.04292	0.0597123	1	0.806951	0
Hepatocellular-carcinoma:GCST90200355	0.293318	0.854883	0.638126	1.14527	0.977674	1	0.322774	0
Hepatocellular-carcinoma:GCST90200271	0.293484	0.845699	0.618616	1.15614	1.58963	1	0.207378	0.370924
Hepatocellular-carcinoma:GCST90200184	0.293775	1.14826	0.88706	1.48638	0.344239	1	0.557393	0
Hepatocellular-carcinoma:GCST90200295	0.294326	0.687997	0.34201	1.38399	2.64611	1	0.103804	0.622087
Hepatocellular-carcinoma:GCST90199854	0.29453	0.762332	0.458966	1.26622	2.40743	1	0.12076	0.58462
Hepatocellular-carcinoma:GCST90200535	0.296182	0.780649	0.490549	1.24231	1.20801	1	0.271726	0.172195
Hepatocellular-carcinoma:GCST90200807	0.29816	1.21704	0.840624	1.762	1.08638	1	0.297274	0.0795131
Hepatocellular-carcinoma:GCST90200098	0.298539	0.840158	0.604999	1.16672	0.00133665	1	0.970836	0
Hepatocellular-carcinoma:GCST90200641	0.299991	0.772948	0.474941	1.25794	0.894538	1	0.34425	0
Hepatocellular-carcinoma:GCST90200789	0.300063	0.776172	0.480655	1.25338	0.214466	1	0.643289	0
Hepatocellular-carcinoma:GCST90200709	0.300086	1.20384	0.847581	1.70984	2.49844	1	0.113959	0.59975
Hepatocellular-carcinoma:GCST90200039	0.300698	0.819209	0.561542	1.19511	1.75658	1	0.185052	0.430711
Hepatocellular-carcinoma:GCST90200857	0.301098	1.24352	0.822719	1.87954	0.821881	1	0.364631	0
Hepatocellular-carcinoma:GCST90200316	0.301115	0.883597	0.698847	1.11719	0.0219573	1	0.882201	0
Hepatocellular-carcinoma:GCST90200291	0.30152	1.27308	0.805273	2.01264	0.629641	1	0.427487	0
Hepatocellular-carcinoma:GCST90200750	0.301701	1.22293	0.83471	1.79172	0.0457432	1	0.830643	0
Hepatocellular-carcinoma:GCST90200940	0.302487	0.84246	0.60818	1.16699	0.108687	1	0.741644	0
Hepatocellular-carcinoma:GCST90200729	0.303549	1.28114	0.799146	2.05383	0.00343333	1	0.953275	0
Hepatocellular-carcinoma:GCST90199706	0.304142	0.913189	0.767956	1.08589	2.45e-06	1	0.99875	0
Hepatocellular-carcinoma:GCST90199913	0.304326	1.24036	0.822345	1.87084	0.376922	1	0.539255	0
Hepatocellular-carcinoma:GCST90200921	0.305173	0.780446	0.485921	1.25349	0.184883	1	0.66721	0
Hepatocellular-carcinoma:GCST90200001	0.305199	0.858369	0.641049	1.14936	0.185192	1	0.666948	0
Hepatocellular-carcinoma:GCST90200047	0.305428	0.837235	0.596074	1.17597	0.152485	1	0.696172	0
Hepatocellular-carcinoma:GCST90201001	0.305574	0.798891	0.519932	1.22752	0.215751	1	0.642297	0
Hepatocellular-carcinoma:GCST90199711	0.30636	0.759803	0.44886	1.28615	0.0437065	1	0.834401	0
Hepatocellular-carcinoma:GCST90199722	0.307157	1.15389	0.876708	1.5187	0.751725	1	0.385931	0
Hepatocellular-carcinoma:GCST90199637	0.307301	1.4727	0.700424	3.09649	2.08699	1	0.148559	0.52084
Hepatocellular-carcinoma:GCST90200977	0.307555	1.36651	0.750106	2.48943	2.30446	1	0.129003	0.566059
Hepatocellular-carcinoma:GCST90199945	0.310147	1.16576	0.866917	1.56761	0.00671441	1	0.934693	0
Hepatocellular-carcinoma:GCST90200449	0.314962	0.704401	0.355629	1.39522	0.0596476	1	0.807054	0
Hepatocellular-carcinoma:GCST90200922	0.315088	1.39134	0.730464	2.65012	0.661661	1	0.415974	0
Hepatocellular-carcinoma:GCST90200596	0.315528	1.21167	0.832827	1.76285	0.155667	1	0.693177	0
Hepatocellular-carcinoma:GCST90200309	0.315991	1.17448	0.85768	1.60828	0.351107	1	0.553487	0
Hepatocellular-carcinoma:GCST90200319	0.316078	1.12737	0.891822	1.42513	0.392002	1	0.531249	0
Hepatocellular-carcinoma:GCST90199865	0.316088	0.823923	0.564215	1.20318	0.546275	1	0.459844	0
Hepatocellular-carcinoma:GCST90200031	0.316154	1.13834	0.883578	1.46655	0.000774615	1	0.977796	0
Hepatocellular-carcinoma:GCST90200434	0.316353	1.24993	0.807919	1.93377	1.37152	1	0.241551	0.270882
Hepatocellular-carcinoma:GCST90199915	0.318248	0.816929	0.549205	1.21516	0.870231	1	0.350891	0
Hepatocellular-carcinoma:GCST90199763	0.319693	0.893118	0.714853	1.11584	0.025628	1	0.872812	0
Hepatocellular-carcinoma:GCST90200115	0.319884	1.16394	0.863017	1.56979	0.0814221	1	0.775379	0
Hepatocellular-carcinoma:GCST90199937	0.320157	0.71936	0.375762	1.37715	1.95538	1	0.162008	0.488591
Hepatocellular-carcinoma:GCST90200692	0.320571	0.851068	0.619112	1.16993	0.146699	1	0.70171	0
Hepatocellular-carcinoma:GCST90200357	0.321452	0.843375	0.602253	1.18104	0.0332805	1	0.855246	0
Hepatocellular-carcinoma:GCST90199949	0.32158	1.25648	0.800006	1.9734	0.233566	1	0.628892	0
Hepatocellular-carcinoma:GCST90200652	0.32186	1.1225	0.893086	1.41085	0.0118283	1	0.913394	0
Hepatocellular-carcinoma:GCST90200874	0.322456	0.838635	0.591803	1.18842	0.278574	1	0.597637	0
Hepatocellular-carcinoma:GCST90199916	0.325261	1.17989	0.848599	1.64051	0.43206	1	0.51098	0
Hepatocellular-carcinoma:GCST90200946	0.325657	1.29335	0.774368	2.16015	0.742692	1	0.3888	0
Hepatocellular-carcinoma:GCST90200915	0.326217	0.634362	0.255699	1.57379	2.20548	1	0.137521	0.546585
Hepatocellular-carcinoma:GCST90199771	0.32633	1.25846	0.795198	1.99161	0.967184	1	0.325383	0
Hepatocellular-carcinoma:GCST90199621	0.326602	1.13102	0.884381	1.44644	0.162401	1	0.686955	0
Hepatocellular-carcinoma:GCST90200109	0.328163	0.862915	0.642127	1.15962	0.476395	1	0.49006	0
Hepatocellular-carcinoma:GCST90200207	0.328276	1.18419	0.843762	1.66197	0.177318	1	0.673688	0
Hepatocellular-carcinoma:GCST90199715	0.328351	1.3757	0.725697	2.60791	0.701989	1	0.402116	0
Hepatocellular-carcinoma:GCST90199974	0.329696	0.798474	0.507842	1.25543	0.423965	1	0.514965	0
Hepatocellular-carcinoma:GCST90200422	0.329854	0.842516	0.596874	1.18925	0.142254	1	0.706051	0
Hepatocellular-carcinoma:GCST90199907	0.330032	0.772065	0.458768	1.29932	0.19433	1	0.659337	0
Hepatocellular-carcinoma:GCST90201003	0.331538	1.28029	0.777522	2.10815	0.0842177	1	0.771661	0
Hepatocellular-carcinoma:GCST90200427	0.335109	0.850617	0.612144	1.18199	0.260932	1	0.609481	0
Hepatocellular-carcinoma:GCST90200660	0.336643	1.32355	0.74714	2.34467	0.0351497	1	0.851282	0
Hepatocellular-carcinoma:GCST90199985	0.336684	0.823123	0.553359	1.2244	1.85e-05	1	0.996565	0
Hepatocellular-carcinoma:GCST90200154	0.337738	1.50321	0.65328	3.45893	2.8452	1	0.0916472	0.648531
Hepatocellular-carcinoma:GCST90200749	0.337898	1.2219	0.811018	1.84095	0.215151	1	0.64276	0
Hepatocellular-carcinoma:GCST90200569	0.338715	1.25857	0.785714	2.01599	0.0802893	1	0.776906	0
Hepatocellular-carcinoma:GCST90200344	0.340808	0.830494	0.566719	1.21704	0.130553	1	0.717859	0
Hepatocellular-carcinoma:GCST90200755	0.342479	0.796556	0.498034	1.27401	1.67349	1	0.195791	0.402448
Hepatocellular-carcinoma:GCST90200548	0.342782	1.14599	0.8648	1.5186	0.0122515	1	0.911865	0
Hepatocellular-carcinoma:GCST90199782	0.342897	1.32167	0.742717	2.35193	2.41486	1	0.120189	0.585897
Hepatocellular-carcinoma:GCST90199969	0.343329	1.12025	0.885759	1.41682	0.00690541	1	0.933773	0
Hepatocellular-carcinoma:GCST90200362	0.343362	0.921742	0.778761	1.09097	0.529326	1	0.46689	0
Hepatocellular-carcinoma:GCST90200052	0.343572	1.10178	0.901539	1.3465	0.142299	1	0.706006	0
Hepatocellular-carcinoma:GCST90200923	0.347552	0.824122	0.550435	1.23389	0.446186	1	0.504152	0
Hepatocellular-carcinoma:GCST90200425	0.348776	0.863445	0.63511	1.17387	1.09699	1	0.294927	0.0884178
Hepatocellular-carcinoma:GCST90199710	0.348904	0.856241	0.618816	1.18476	0.997957	1	0.317805	0
Hepatocellular-carcinoma:GCST90200900	0.349292	1.1444	0.862805	1.5179	0.518383	1	0.471532	0
Hepatocellular-carcinoma:GCST90199859	0.350532	0.848893	0.601843	1.19736	0.369523	1	0.543264	0
Hepatocellular-carcinoma:GCST90200471	0.35093	1.07578	0.92271	1.25425	0.422143	1	0.51587	0
Hepatocellular-carcinoma:GCST90199931	0.351132	0.832307	0.565866	1.2242	0.137806	1	0.710472	0
Hepatocellular-carcinoma:GCST90200833	0.352413	0.69907	0.328716	1.48669	2.00408	1	0.156876	0.501018
Hepatocellular-carcinoma:GCST90200022	0.353338	1.1192	0.882326	1.41966	1.02726	1	0.310802	0.0265397
Hepatocellular-carcinoma:GCST90200882	0.354427	1.16675	0.841818	1.61711	0.00306103	1	0.955878	0
Hepatocellular-carcinoma:GCST90200088	0.355028	1.19766	0.817206	1.75524	0.000170765	1	0.989574	0
Hepatocellular-carcinoma:GCST90201002	0.355911	1.24094	0.784715	1.96242	0.458358	1	0.498392	0
Hepatocellular-carcinoma:GCST90199849	0.356326	0.88572	0.684396	1.14627	0.0264528	1	0.870799	0
Hepatocellular-carcinoma:GCST90200400	0.356587	0.797768	0.493473	1.2897	0.262043	1	0.60872	0
Hepatocellular-carcinoma:GCST90200880	0.356902	1.24561	0.780661	1.98749	1.13602	1	0.286495	0.119732
Hepatocellular-carcinoma:GCST90199863	0.357179	1.08596	0.911125	1.29435	0.555631	1	0.456026	0
Hepatocellular-carcinoma:GCST90200006	0.358034	1.20809	0.807284	1.8079	0.000187295	1	0.989081	0
Hepatocellular-carcinoma:GCST90199874	0.360973	1.24606	0.777245	1.99765	0.196212	1	0.657796	0
Hepatocellular-carcinoma:GCST90200650	0.361391	1.16577	0.838627	1.62053	0.043649	1	0.834508	0
Hepatocellular-carcinoma:GCST90200985	0.361433	1.16675	0.837798	1.62485	1.01711	1	0.313205	0.0168249
Hepatocellular-carcinoma:GCST90199760	0.363964	1.1226	0.874564	1.44099	0.271415	1	0.602384	0
Hepatocellular-carcinoma:GCST90200557	0.365801	0.775764	0.447454	1.34496	1.1512	1	0.283297	0.131343
Hepatocellular-carcinoma:GCST90199873	0.365865	1.15837	0.842278	1.5931	0.676298	1	0.410865	0
Hepatocellular-carcinoma:GCST90200063	0.366803	1.19912	0.808339	1.77881	2.01093	1	0.15617	0.502716
Hepatocellular-carcinoma:GCST90199939	0.367189	0.811554	0.515487	1.27766	0.62136	1	0.430542	0
Hepatocellular-carcinoma:GCST90200508	0.367304	1.23466	0.780763	1.95244	0.377503	1	0.538943	0
Hepatocellular-carcinoma:GCST90200023	0.368307	0.582987	0.17994	1.88882	3.50091	1	0.0613352	0.71436
Hepatocellular-carcinoma:GCST90199867	0.369171	0.802448	0.496369	1.29727	0.000367356	1	0.984708	0
Hepatocellular-carcinoma:GCST90199778	0.369345	1.3077	0.728007	2.34897	1.99161	1	0.158173	0.497893
Hepatocellular-carcinoma:GCST90200078	0.370137	1.20043	0.805068	1.78995	0.89471	1	0.344204	0
Hepatocellular-carcinoma:GCST90200206	0.370637	1.21302	0.794809	1.85128	0.00688797	1	0.933856	0
Hepatocellular-carcinoma:GCST90200771	0.370941	1.23905	0.774762	1.98157	0.102349	1	0.749028	0
Hepatocellular-carcinoma:GCST90200538	0.371575	1.39981	0.669367	2.92735	2.27801	1	0.13122	0.561021
Hepatocellular-carcinoma:GCST90199743	0.37174	1.53688	0.598553	3.94616	3.58239	1	0.0583951	0.720857
Hepatocellular-carcinoma:GCST90200951	0.37188	0.809964	0.509984	1.2864	0.025012	1	0.874337	0
Hepatocellular-carcinoma:GCST90200740	0.372774	1.13355	0.860448	1.49333	0.346532	1	0.556083	0
Hepatocellular-carcinoma:GCST90200210	0.373398	0.815814	0.521104	1.2772	0.212144	1	0.645092	0
Hepatocellular-carcinoma:GCST90199689	0.373853	0.853614	0.602229	1.20993	0.971851	1	0.324219	0
Hepatocellular-carcinoma:GCST90200345	0.374945	0.865117	0.628162	1.19146	0.923874	1	0.33646	0
Hepatocellular-carcinoma:GCST90200906	0.375754	1.15051	0.843633	1.56901	0.00041925	1	0.983664	0
Hepatocellular-carcinoma:GCST90199948	0.375893	0.808563	0.50518	1.29414	0.0109888	1	0.916513	0
Hepatocellular-carcinoma:GCST90200131	0.378177	1.13998	0.851837	1.52558	0.2723	1	0.601793	0
Hepatocellular-carcinoma:GCST90200903	0.378887	0.705199	0.323927	1.53524	0.779913	1	0.377168	0
Hepatocellular-carcinoma:GCST90200202	0.379659	0.724033	0.352277	1.4881	2.58624	1	0.107796	0.613338
Hepatocellular-carcinoma:GCST90199997	0.379746	1.24074	0.766735	2.00777	5e-05	1	0.994359	0
Hepatocellular-carcinoma:GCST90199623	0.380858	1.20698	0.792446	1.83836	1.77155	1	0.183191	0.435521
Hepatocellular-carcinoma:GCST90200195	0.38285	1.09716	0.890892	1.35119	0.127129	1	0.721428	0
Hepatocellular-carcinoma:GCST90200229	0.383474	1.19189	0.803136	1.76881	0.243765	1	0.6215	0
Hepatocellular-carcinoma:GCST90199708	0.383994	0.874415	0.646401	1.18286	0.121765	1	0.727128	0
Hepatocellular-carcinoma:GCST90200044	0.384939	1.25885	0.748937	2.11595	0.037788	1	0.84587	0
Hepatocellular-carcinoma:GCST90200500	0.385642	1.19465	0.799353	1.78543	1.90198	1	0.167857	0.474233
Hepatocellular-carcinoma:GCST90200885	0.386205	1.16898	0.821174	1.6641	0.745328	1	0.38796	0
Hepatocellular-carcinoma:GCST90200424	0.386681	1.11836	0.868132	1.44071	0.168413	1	0.681526	0
Hepatocellular-carcinoma:GCST90200180	0.386866	1.2016	0.792689	1.82144	0.106204	1	0.744508	0
Hepatocellular-carcinoma:GCST90200735	0.38738	0.80436	0.490977	1.31777	1.3008	1	0.254068	0.23124
Hepatocellular-carcinoma:GCST90200091	0.387472	0.818227	0.519133	1.28964	0.55362	1	0.456842	0
Hepatocellular-carcinoma:GCST90200390	0.388805	1.43976	0.62848	3.29828	0.000317866	1	0.985775	0
Hepatocellular-carcinoma:GCST90199756	0.389144	1.17108	0.8175	1.67759	0.27881	1	0.597482	0
Hepatocellular-carcinoma:GCST90200018	0.390192	0.857107	0.602962	1.21837	0.543602	1	0.460944	0
Hepatocellular-carcinoma:GCST90200164	0.391829	0.91485	0.746251	1.12154	0.454537	1	0.500188	0
Hepatocellular-carcinoma:GCST90200742	0.391925	1.24667	0.752566	2.06518	0.478609	1	0.489053	0
Hepatocellular-carcinoma:GCST90200994	0.393354	0.836378	0.554906	1.26062	0.160448	1	0.688744	0
Hepatocellular-carcinoma:GCST90199817	0.393514	1.23189	0.763	1.98894	1.77449	1	0.182827	0.436458
Hepatocellular-carcinoma:GCST90200429	0.39394	0.776439	0.433964	1.38919	1.72664	1	0.188841	0.42084
Hepatocellular-carcinoma:GCST90200219	0.394283	0.883431	0.664244	1.17494	0.161326	1	0.687938	0
Hepatocellular-carcinoma:GCST90200711	0.394662	0.80761	0.493769	1.32093	2.56283	1	0.109403	0.609806
Hepatocellular-carcinoma:GCST90199921	0.395144	0.755786	0.396381	1.44107	0.59079	1	0.442114	0
Hepatocellular-carcinoma:GCST90199941	0.396425	0.883978	0.664747	1.17551	0.00965579	1	0.921723	0
Hepatocellular-carcinoma:GCST90200488	0.398317	0.90745	0.724355	1.13683	0.24925	1	0.617604	0
Hepatocellular-carcinoma:GCST90199883	0.400128	1.13975	0.840383	1.54575	0.133458	1	0.714873	0
Hepatocellular-carcinoma:GCST90199964	0.400294	0.888324	0.674108	1.17061	0.00181308	1	0.966036	0
Hepatocellular-carcinoma:GCST90200899	0.400401	0.734941	0.358524	1.50656	2.57615	1	0.108485	0.611824
Hepatocellular-carcinoma:GCST90200630	0.400509	0.894477	0.689702	1.16005	0.377771	1	0.538799	0
Hepatocellular-carcinoma:GCST90200208	0.403643	0.847171	0.574021	1.2503	0.14398	1	0.704356	0
Hepatocellular-carcinoma:GCST90199872	0.405296	0.870484	0.627896	1.2068	0.08816	1	0.766529	0
Hepatocellular-carcinoma:GCST90200405	0.406519	1.36134	0.657101	2.82032	1.96041	1	0.161469	0.489903
Hepatocellular-carcinoma:GCST90200724	0.406809	0.808548	0.48937	1.3359	0.348021	1	0.555235	0
Hepatocellular-carcinoma:GCST90200995	0.407644	1.28528	0.709579	2.32808	1.70261	1	0.191947	0.412666
Hepatocellular-carcinoma:GCST90200482	0.409079	0.821203	0.514441	1.31089	0.51941	1	0.471093	0
Hepatocellular-carcinoma:GCST90200244	0.409366	0.805094	0.481025	1.34749	1.5275	1	0.216489	0.345334
Hepatocellular-carcinoma:GCST90199932	0.411128	0.934138	0.794057	1.09893	0.259736	1	0.610302	0
Hepatocellular-carcinoma:GCST90200404	0.411393	1.80253	0.441924	7.35219	11.617	1	0.000653527	0.913919
Hepatocellular-carcinoma:GCST90200562	0.412282	1.17189	0.802064	1.71225	1.1864	1	0.276057	0.157115
Hepatocellular-carcinoma:GCST90200084	0.414155	1.40981	0.618233	3.21493	2.34229	1	0.125904	0.573067
Hepatocellular-carcinoma:GCST90200255	0.414485	1.16539	0.806893	1.68318	0.631297	1	0.42688	0
Hepatocellular-carcinoma:GCST90200525	0.414827	1.35921	0.650006	2.84222	2.22713	1	0.135605	0.550993
Hepatocellular-carcinoma:GCST90200815	0.415296	1.09293	0.882552	1.35345	0.0889175	1	0.765558	0
Hepatocellular-carcinoma:GCST90199783	0.415651	1.09334	0.881942	1.3554	0.743216	1	0.388633	0
Hepatocellular-carcinoma:GCST90199670	0.41774	1.25927	0.721052	2.19922	4.41e-05	1	0.994704	0
Hepatocellular-carcinoma:GCST90200902	0.418476	1.16084	0.808839	1.66602	0.379096	1	0.538087	0
Hepatocellular-carcinoma:GCST90200228	0.419844	1.18113	0.788206	1.76993	0.0110737	1	0.916192	0
Hepatocellular-carcinoma:GCST90200775	0.419975	1.17859	0.790548	1.75711	0.434184	1	0.509943	0
Hepatocellular-carcinoma:GCST90200099	0.422159	0.779449	0.424188	1.43225	2.33707	1	0.126327	0.572114
Hepatocellular-carcinoma:GCST90200064	0.423665	0.843902	0.556838	1.27895	0.00358828	1	0.952233	0
Hepatocellular-carcinoma:GCST90199834	0.423866	0.759369	0.386785	1.49086	2.01592	1	0.155656	0.50395
Hepatocellular-carcinoma:GCST90200297	0.425775	1.16946	0.795576	1.71904	0.186548	1	0.665805	0
Hepatocellular-carcinoma:GCST90200486	0.426203	1.17678	0.788065	1.75722	0.112555	1	0.737254	0
Hepatocellular-carcinoma:GCST90200191	0.426327	0.865088	0.605322	1.23633	0.352747	1	0.552562	0
Hepatocellular-carcinoma:GCST90200126	0.426999	1.18825	0.776388	1.8186	0.585987	1	0.443975	0
Hepatocellular-carcinoma:GCST90200161	0.427063	1.21044	0.755542	1.93922	1.6715	1	0.196057	0.401736
Hepatocellular-carcinoma:GCST90200491	0.42726	0.725587	0.328669	1.60185	3.25991	1	0.0709929	0.693243
Hepatocellular-carcinoma:GCST90199770	0.427983	1.14963	0.814359	1.62294	0.0245703	1	0.875443	0
Hepatocellular-carcinoma:GCST90200461	0.428272	1.16187	0.801569	1.68414	0.0126972	1	0.910283	0
Hepatocellular-carcinoma:GCST90199635	0.428373	0.875794	0.630754	1.21603	0.915646	1	0.338621	0
Hepatocellular-carcinoma:GCST90200737	0.428645	0.876456	0.632291	1.21491	0.87417	1	0.349803	0
Hepatocellular-carcinoma:GCST90200814	0.429201	0.726792	0.32947	1.60326	2.11039	1	0.146302	0.526155
Hepatocellular-carcinoma:GCST90200278	0.430212	1.2793	0.693721	2.35917	0.226977	1	0.633774	0
Hepatocellular-carcinoma:GCST90200895	0.430347	1.15399	0.808363	1.6474	0.841341	1	0.359013	0
Hepatocellular-carcinoma:GCST90199734	0.430943	0.834046	0.530962	1.31014	0.988344	1	0.320148	0
Hepatocellular-carcinoma:GCST90200198	0.431746	0.810677	0.48041	1.36799	0.251695	1	0.615884	0
Hepatocellular-carcinoma:GCST90200320	0.432983	1.31288	0.664821	2.59265	1.0783	1	0.299078	0.0726148
Hepatocellular-carcinoma:GCST90200911	0.434225	0.841552	0.546141	1.29675	1.28976	1	0.256093	0.22466
Hepatocellular-carcinoma:GCST90199717	0.434714	0.902087	0.696569	1.16824	0.527279	1	0.467753	0
Hepatocellular-carcinoma:GCST90200932	0.434834	0.810525	0.478404	1.37321	0.0160883	1	0.899067	0
Hepatocellular-carcinoma:GCST90200799	0.435288	0.884932	0.650934	1.20305	0.581395	1	0.445766	0
Hepatocellular-carcinoma:GCST90200930	0.435514	0.802729	0.462071	1.39453	0.739359	1	0.389866	0
Hepatocellular-carcinoma:GCST90200467	0.43597	0.836774	0.534434	1.31015	0.297855	1	0.58523	0
Hepatocellular-carcinoma:GCST90200818	0.436204	0.835393	0.531216	1.31374	1.05933	1	0.303369	0.0560038
Hepatocellular-carcinoma:GCST90199785	0.436902	0.781923	0.420556	1.4538	3.08177	1	0.0791741	0.675512
Hepatocellular-carcinoma:GCST90200178	0.436979	0.870372	0.613297	1.2352	0.733913	1	0.391618	0
Hepatocellular-carcinoma:GCST90199847	0.437322	0.647472	0.216203	1.93901	7.15838	1	0.00746144	0.860304
Hepatocellular-carcinoma:GCST90200070	0.43735	0.901283	0.693349	1.17158	0.163432	1	0.686016	0
Hepatocellular-carcinoma:GCST90199832	0.438271	1.37352	0.615609	3.06453	2.71097	1	0.0996605	0.631128
Hepatocellular-carcinoma:GCST90199990	0.439629	1.17687	0.778665	1.77872	0.0159376	1	0.899539	0
Hepatocellular-carcinoma:GCST90200174	0.439759	0.894354	0.673746	1.1872	1.12966	1	0.287848	0.114778
Hepatocellular-carcinoma:GCST90200145	0.440175	0.906848	0.707471	1.16241	0.774168	1	0.378931	0
Hepatocellular-carcinoma:GCST90200197	0.440881	0.796135	0.445851	1.42162	0.391408	1	0.53156	0
Hepatocellular-carcinoma:GCST90200189	0.44091	0.671187	0.243482	1.85021	6.88084	1	0.00871247	0.854669
Hepatocellular-carcinoma:GCST90200919	0.443659	0.848407	0.557096	1.29205	0.432095	1	0.510963	0
Hepatocellular-carcinoma:GCST90200296	0.44366	1.18568	0.766854	1.83326	0.0267216	1	0.87015	0
Hepatocellular-carcinoma:GCST90200996	0.444279	1.19329	0.758779	1.87662	0.104961	1	0.745955	0
Hepatocellular-carcinoma:GCST90200242	0.444546	1.15997	0.792927	1.69691	1.41782	1	0.233762	0.294693
Hepatocellular-carcinoma:GCST90200937	0.446197	1.21234	0.738701	1.98965	0.712132	1	0.398737	0
Hepatocellular-carcinoma:GCST90200074	0.446379	0.918391	0.737671	1.14338	0.062057	1	0.803274	0
Hepatocellular-carcinoma:GCST90200708	0.44667	1.0749	0.892435	1.29467	0.0943795	1	0.758682	0
Hepatocellular-carcinoma:GCST90200432	0.447266	0.84517	0.54769	1.30423	0.0347872	1	0.852042	0
Hepatocellular-carcinoma:GCST90200136	0.447713	0.902729	0.693152	1.17567	0.395257	1	0.529549	0
Hepatocellular-carcinoma:GCST90199639	0.448245	1.07337	0.89388	1.28889	0.00395034	1	0.949885	0
Hepatocellular-carcinoma:GCST90200021	0.448411	1.1235	0.831412	1.51821	0.671696	1	0.412461	0
Hepatocellular-carcinoma:GCST90201017	0.450635	1.32807	0.635433	2.7757	2.14769	1	0.142785	0.534383
Hepatocellular-carcinoma:GCST90199749	0.450729	0.884978	0.644204	1.21574	0.0042929	1	0.94776	0
Hepatocellular-carcinoma:GCST90200870	0.45155	1.19796	0.748549	1.91719	1.14844	1	0.283876	0.129252
Hepatocellular-carcinoma:GCST90200547	0.45448	0.789024	0.42406	1.46809	2.90963	1	0.0880519	0.656314
Hepatocellular-carcinoma:GCST90200988	0.456424	1.22446	0.718625	2.08633	0.281357	1	0.595813	0
Hepatocellular-carcinoma:GCST90200341	0.457504	1.14386	0.802383	1.63067	0.159989	1	0.689166	0
Hepatocellular-carcinoma:GCST90200512	0.457676	1.10003	0.855332	1.41474	0.516915	1	0.472161	0
Hepatocellular-carcinoma:GCST90200717	0.457769	1.1535	0.791259	1.68156	0.0701478	1	0.791122	0
Hepatocellular-carcinoma:GCST90200490	0.458047	1.14593	0.79966	1.64216	0.891595	1	0.345046	0
Hepatocellular-carcinoma:GCST90200990	0.459177	1.11449	0.836415	1.48502	0.671642	1	0.41248	0
Hepatocellular-carcinoma:GCST90199694	0.460362	1.1395	0.805641	1.61172	0.159744	1	0.689392	0
Hepatocellular-carcinoma:GCST90200476	0.461317	1.17154	0.768824	1.7852	0.0062985	1	0.936744	0
Hepatocellular-carcinoma:GCST90199682	0.463691	1.12282	0.823661	1.53063	0.00794242	1	0.928986	0
Hepatocellular-carcinoma:GCST90200726	0.464925	1.10578	0.844398	1.44806	1.60528	1	0.205156	0.377056
Hepatocellular-carcinoma:GCST90199943	0.464982	1.21814	0.717501	2.06809	0.0963682	1	0.756232	0
Hepatocellular-carcinoma:GCST90199884	0.465618	1.20197	0.733297	1.97018	0.128165	1	0.720342	0
Hepatocellular-carcinoma:GCST90200224	0.466094	1.25036	0.685637	2.28022	1.96413	1	0.161073	0.490868
Hepatocellular-carcinoma:GCST90199666	0.466335	1.86398	0.34898	9.9559	16.5665	1	4.7e-05	0.939637
Hepatocellular-carcinoma:GCST90199745	0.467306	0.828865	0.499666	1.37495	1.27223	1	0.259349	0.213977
Hepatocellular-carcinoma:GCST90200623	0.46737	1.14664	0.792802	1.65839	0.12468	1	0.724013	0
Hepatocellular-carcinoma:GCST90199685	0.467387	0.857327	0.566039	1.29851	0.151126	1	0.697462	0
Hepatocellular-carcinoma:GCST90199737	0.468572	1.19053	0.742902	1.90786	1.03233	1	0.309612	0.0313185
Hepatocellular-carcinoma:GCST90199695	0.468589	1.21228	0.720314	2.04025	0.750175	1	0.386421	0
Hepatocellular-carcinoma:GCST90199972	0.469357	1.22263	0.709289	2.10748	0.36515	1	0.54566	0
Hepatocellular-carcinoma:GCST90200213	0.469888	1.38377	0.573429	3.33923	3.41487	1	0.0646116	0.707163
Hepatocellular-carcinoma:GCST90200679	0.471646	0.924646	0.747017	1.14451	0.147384	1	0.701048	0
Hepatocellular-carcinoma:GCST90200457	0.473578	1.51941	0.483977	4.7701	3.98904	1	0.0457972	0.749313
Hepatocellular-carcinoma:GCST90200478	0.474679	0.738381	0.321479	1.69593	3.49667	1	0.0614923	0.714014
Hepatocellular-carcinoma:GCST90200106	0.475128	0.858865	0.565701	1.30396	0.579021	1	0.446696	0
Hepatocellular-carcinoma:GCST90199888	0.475837	1.12027	0.819871	1.53072	0.00608404	1	0.937828	0
Hepatocellular-carcinoma:GCST90199842	0.476113	1.11047	0.832405	1.48143	1.03679	1	0.308569	0.0354853
Hepatocellular-carcinoma:GCST90200860	0.476421	1.18681	0.740707	1.90159	0.0334784	1	0.854821	0
Hepatocellular-carcinoma:GCST90200852	0.476732	1.32325	0.61177	2.86217	1.70063	1	0.192205	0.411984
Hepatocellular-carcinoma:GCST90200324	0.476909	0.831617	0.500346	1.38222	1.80896	1	0.178633	0.447197
Hepatocellular-carcinoma:GCST90200045	0.478859	1.1787	0.747782	1.85794	2.28129	1	0.130943	0.561651
Hepatocellular-carcinoma:GCST90200741	0.479671	1.2132	0.709901	2.07332	0.405827	1	0.524095	0
Hepatocellular-carcinoma:GCST90200558	0.480604	1.12694	0.808499	1.5708	0.459866	1	0.497686	0
Hepatocellular-carcinoma:GCST90200371	0.481388	0.770516	0.372915	1.59204	2.13944	1	0.143554	0.532588
Hepatocellular-carcinoma:GCST90200811	0.48193	1.15595	0.771821	1.73125	0.281003	1	0.596044	0
Hepatocellular-carcinoma:GCST90200117	0.484435	1.12203	0.812511	1.54947	0.331853	1	0.56457	0
Hepatocellular-carcinoma:GCST90199809	0.484822	0.881502	0.61878	1.25577	0.116476	1	0.732888	0
Hepatocellular-carcinoma:GCST90200689	0.485098	1.05783	0.903384	1.23867	6.57e-05	1	0.993531	0
Hepatocellular-carcinoma:GCST90200172	0.485109	1.11695	0.818804	1.52365	0.0190322	1	0.890274	0
Hepatocellular-carcinoma:GCST90199911	0.485328	0.921442	0.732253	1.15951	0.188663	1	0.664032	0
Hepatocellular-carcinoma:GCST90200594	0.485892	0.834162	0.500912	1.38912	2.94645	1	0.0860662	0.660609
Hepatocellular-carcinoma:GCST90199718	0.487396	0.864957	0.574347	1.30261	1.46163	1	0.226671	0.315831
Hepatocellular-carcinoma:GCST90200226	0.487529	1.46842	0.496367	4.3441	5.95478	1	0.0146774	0.832068
Hepatocellular-carcinoma:GCST90200376	0.487727	0.913292	0.706894	1.17995	0.0602957	1	0.806029	0
Hepatocellular-carcinoma:GCST90199844	0.488311	0.882793	0.62049	1.25598	2.30584	1	0.128889	0.566318
Hepatocellular-carcinoma:GCST90199746	0.488435	0.850802	0.538653	1.34384	0.407845	1	0.523065	0
Hepatocellular-carcinoma:GCST90200550	0.488515	1.18851	0.729083	1.93744	1.94438	1	0.163193	0.485698
Hepatocellular-carcinoma:GCST90199998	0.489803	1.20126	0.713888	2.02136	0.135454	1	0.712843	0
Hepatocellular-carcinoma:GCST90200621	0.490822	0.873322	0.594069	1.28384	0.681418	1	0.409099	0
Hepatocellular-carcinoma:GCST90199823	0.491312	0.859762	0.559111	1.32208	0.0580765	1	0.809562	0
Hepatocellular-carcinoma:GCST90200752	0.492789	1.18564	0.728827	1.92878	1.23331	1	0.266763	0.189177
Hepatocellular-carcinoma:GCST90199646	0.494117	1.12822	0.798385	1.59432	0.274693	1	0.600201	0
Hepatocellular-carcinoma:GCST90200907	0.494207	1.16074	0.75708	1.77962	0.647168	1	0.421127	0
Hepatocellular-carcinoma:GCST90200134	0.494434	0.924583	0.738349	1.15779	0.481025	1	0.487958	0
Hepatocellular-carcinoma:GCST90200080	0.49482	1.24885	0.659814	2.36375	2.1194	1	0.145443	0.528169
Hepatocellular-carcinoma:GCST90200581	0.496825	1.05137	0.90992	1.21481	0.271188	1	0.602536	0
Hepatocellular-carcinoma:GCST90200343	0.497648	1.14562	0.773419	1.69694	0.392885	1	0.530787	0
Hepatocellular-carcinoma:GCST90200734	0.497694	1.28526	0.622268	2.65462	1.82396	1	0.176842	0.451743
Hepatocellular-carcinoma:GCST90199962	0.498235	1.16669	0.74678	1.82271	1.95133	1	0.162444	0.487528
Hepatocellular-carcinoma:GCST90199662	0.498897	1.16943	0.74295	1.84072	0.616397	1	0.432389	0
Hepatocellular-carcinoma:GCST90200102	0.499398	0.896714	0.653531	1.23039	0.224618	1	0.635543	0
Hepatocellular-carcinoma:GCST90200383	0.499443	1.14593	0.771745	1.70155	1.1251	1	0.288822	0.111193
Hepatocellular-carcinoma:GCST90200302	0.500515	0.872797	0.587502	1.29663	0.139886	1	0.708394	0
Hepatocellular-carcinoma:GCST90200414	0.500646	0.833974	0.491687	1.41454	0.759998	1	0.383329	0
Hepatocellular-carcinoma:GCST90200965	0.502171	0.874925	0.592228	1.29256	0.0855511	1	0.769911	0
Hepatocellular-carcinoma:GCST90199886	0.502175	0.924989	0.736604	1.16155	0.082255	1	0.774265	0
Hepatocellular-carcinoma:GCST90200949	0.50477	1.13602	0.780968	1.6525	0.294235	1	0.587519	0
Hepatocellular-carcinoma:GCST90199901	0.505182	1.15739	0.752944	1.7791	0.0121057	1	0.912389	0
Hepatocellular-carcinoma:GCST90200235	0.50616	0.95758	0.842709	1.08811	0.40177	1	0.526177	0
Hepatocellular-carcinoma:GCST90200002	0.506843	0.735223	0.296468	1.82331	2.43772	1	0.118449	0.58978
Hepatocellular-carcinoma:GCST90200108	0.509576	0.620727	0.15046	2.56082	6.55119	1	0.0104814	0.847356
Hepatocellular-carcinoma:GCST90200794	0.509959	1.13274	0.781836	1.64113	0.00409241	1	0.948993	0
Hepatocellular-carcinoma:GCST90199677	0.51033	0.874667	0.587078	1.30313	0.0436688	1	0.834471	0
Hepatocellular-carcinoma:GCST90199803	0.511403	1.17406	0.727248	1.89538	1.4496	1	0.228593	0.310153
Hepatocellular-carcinoma:GCST90200340	0.512609	1.13433	0.777831	1.65423	0.365399	1	0.545523	0
Hepatocellular-carcinoma:GCST90199871	0.513555	0.898227	0.650941	1.23945	0.225206	1	0.635102	0
Hepatocellular-carcinoma:GCST90200187	0.516919	1.24145	0.645464	2.38774	0.05909	1	0.80794	0
Hepatocellular-carcinoma:GCST90200497	0.516944	0.726816	0.276901	1.90776	2.58555	1	0.107843	0.613235
Hepatocellular-carcinoma:GCST90200600	0.518227	0.815799	0.439907	1.51289	0.163541	1	0.685917	0
Hepatocellular-carcinoma:GCST90199820	0.51886	0.835506	0.483967	1.44239	0.177449	1	0.673575	0
Hepatocellular-carcinoma:GCST90200239	0.519635	1.18725	0.704115	2.00191	1.58122	1	0.208586	0.367575
Hepatocellular-carcinoma:GCST90200635	0.520896	0.8262	0.461254	1.47989	2.69009	1	0.100974	0.628266
Hepatocellular-carcinoma:GCST90200406	0.521817	0.875442	0.582709	1.31523	0.115758	1	0.733682	0
Hepatocellular-carcinoma:GCST90200612	0.522481	1.20503	0.680393	2.13421	2.29164	1	0.130073	0.563631
Hepatocellular-carcinoma:GCST90200984	0.52252	0.773934	0.352843	1.69757	0.00148533	1	0.969257	0
Hepatocellular-carcinoma:GCST90199852	0.523534	0.873279	0.575898	1.32422	0.0989658	1	0.753074	0
Hepatocellular-carcinoma:GCST90200876	0.523779	0.934891	0.7601	1.14988	0.335572	1	0.562397	0
Hepatocellular-carcinoma:GCST90199642	0.524207	0.934489	0.758608	1.15115	0.269682	1	0.603545	0
Hepatocellular-carcinoma:GCST90199981	0.525341	1.16326	0.729471	1.85499	0.736327	1	0.39084	0
Hepatocellular-carcinoma:GCST90200199	0.52615	0.611406	0.133559	2.79889	9.08778	1	0.00257324	0.889962
Hepatocellular-carcinoma:GCST90200223	0.527245	1.15337	0.741071	1.79504	0.206907	1	0.649203	0
Hepatocellular-carcinoma:GCST90199769	0.527561	1.13594	0.764923	1.6869	0.065286	1	0.798328	0
Hepatocellular-carcinoma:GCST90200035	0.529699	0.895125	0.633616	1.26457	0.111718	1	0.738197	0
Hepatocellular-carcinoma:GCST90200241	0.529849	1.32783	0.548236	3.21599	5.00043	1	0.025341	0.800017
Hepatocellular-carcinoma:GCST90200716	0.530485	1.13588	0.762849	1.69133	0.00825655	1	0.927599	0
Hepatocellular-carcinoma:GCST90201019	0.532003	1.17381	0.710116	1.94027	0.000238415	1	0.987681	0
Hepatocellular-carcinoma:GCST90200847	0.535019	1.35455	0.519286	3.5333	2.81857	1	0.0931792	0.64521
Hepatocellular-carcinoma:GCST90200384	0.535025	0.721234	0.25685	2.02523	5.00437	1	0.0252834	0.800175
Hepatocellular-carcinoma:GCST90199956	0.537239	0.871022	0.561725	1.35063	0.248108	1	0.618411	0
Hepatocellular-carcinoma:GCST90200264	0.537314	0.91966	0.704796	1.20003	0.0220329	1	0.882	0
Hepatocellular-carcinoma:GCST90199887	0.537414	0.917372	0.697453	1.20664	0.532693	1	0.465477	0
Hepatocellular-carcinoma:GCST90199959	0.539365	1.11954	0.780621	1.60561	0.0287752	1	0.865299	0
Hepatocellular-carcinoma:GCST90200753	0.539586	1.16646	0.713208	1.90777	0.170486	1	0.67968	0
Hepatocellular-carcinoma:GCST90200436	0.539907	0.880961	0.587423	1.32118	0.929087	1	0.3351	0
Hepatocellular-carcinoma:GCST90200082	0.540364	0.884163	0.596173	1.31127	2.24998	1	0.133616	0.555553
Hepatocellular-carcinoma:GCST90200234	0.540749	1.13688	0.753694	1.71487	0.166322	1	0.683402	0
Hepatocellular-carcinoma:GCST90200800	0.541959	1.11785	0.781424	1.59912	0.191267	1	0.661864	0
Hepatocellular-carcinoma:GCST90199908	0.542021	0.8895	0.610498	1.29601	0.0141494	1	0.905314	0
Hepatocellular-carcinoma:GCST90199979	0.543424	0.878961	0.579752	1.33259	0.121627	1	0.727277	0
Hepatocellular-carcinoma:GCST90199837	0.543532	0.845872	0.492903	1.4516	0.266286	1	0.605834	0
Hepatocellular-carcinoma:GCST90200010	0.544083	1.19919	0.666834	2.15654	1.97614	1	0.159798	0.493963
Hepatocellular-carcinoma:GCST90200595	0.544135	0.838855	0.475448	1.48003	2.01e-05	1	0.996418	0
Hepatocellular-carcinoma:GCST90200215	0.545526	1.55665	0.370704	6.53667	7.06727	1	0.00785048	0.858503
Hepatocellular-carcinoma:GCST90200370	0.545905	1.13855	0.747242	1.73478	0.0533994	1	0.81725	0
Hepatocellular-carcinoma:GCST90200631	0.548922	1.14676	0.732819	1.79452	1.40773	1	0.235434	0.289635
Hepatocellular-carcinoma:GCST90201000	0.549041	1.08427	0.832147	1.41279	0.969694	1	0.324757	0
Hepatocellular-carcinoma:GCST90201008	0.549356	0.86937	0.549779	1.37474	1.06923	1	0.30112	0.0647457
Hepatocellular-carcinoma:GCST90200893	0.549395	1.15956	0.714182	1.88267	0.00286039	1	0.957347	0
Hepatocellular-carcinoma:GCST90199840	0.549414	1.06925	0.858771	1.3313	0.272154	1	0.60189	0
Hepatocellular-carcinoma:GCST90199919	0.550334	0.919934	0.699553	1.20974	0.065833	1	0.797503	0
Hepatocellular-carcinoma:GCST90200787	0.550641	0.912217	0.674615	1.2335	0.41107	1	0.521427	0
Hepatocellular-carcinoma:GCST90200969	0.55241	0.871496	0.553626	1.37188	0.369744	1	0.543144	0
Hepatocellular-carcinoma:GCST90200158	0.552926	0.751696	0.292823	1.92966	4.82674	1	0.0280216	0.792821
Hepatocellular-carcinoma:GCST90200975	0.553256	1.1387	0.741193	1.74939	1.04717	1	0.306159	0.0450491
Hepatocellular-carcinoma:GCST90200656	0.553257	0.906714	0.655956	1.25333	0.586105	1	0.443929	0
Hepatocellular-carcinoma:GCST90199903	0.554003	0.85571	0.51073	1.43371	0.941307	1	0.331942	0
Hepatocellular-carcinoma:GCST90200410	0.55438	1.12641	0.759132	1.67137	0.00524455	1	0.942268	0
Hepatocellular-carcinoma:GCST90199892	0.554623	0.859547	0.520268	1.42008	0.317616	1	0.573044	0
Hepatocellular-carcinoma:GCST90200796	0.554678	1.11123	0.783148	1.57675	0.568154	1	0.450993	0
Hepatocellular-carcinoma:GCST90199814	0.55548	1.10838	0.787266	1.56048	0.0164861	1	0.897834	0
Hepatocellular-carcinoma:GCST90199910	0.556074	0.854382	0.505935	1.44281	1.20289	1	0.272745	0.16867
Hepatocellular-carcinoma:GCST90200859	0.556616	0.851241	0.497565	1.45632	1.42305	1	0.232903	0.297282
Hepatocellular-carcinoma:GCST90199855	0.558051	0.949152	0.797072	1.13025	0.325804	1	0.56814	0
Hepatocellular-carcinoma:GCST90200561	0.558604	0.837213	0.461607	1.51845	0.0283141	1	0.866372	0
Hepatocellular-carcinoma:GCST90199652	0.559142	1.14645	0.724752	1.81353	0.223002	1	0.636762	0
Hepatocellular-carcinoma:GCST90200746	0.561098	0.905154	0.646818	1.26667	5.77e-05	1	0.993942	0
Hepatocellular-carcinoma:GCST90199644	0.561112	1.13929	0.733921	1.76854	0.053353	1	0.817328	0
Hepatocellular-carcinoma:GCST90199742	0.561322	1.26719	0.569952	2.81739	3.64108	1	0.0563705	0.725356
Hepatocellular-carcinoma:GCST90200373	0.561481	1.05476	0.881042	1.26273	0.0116104	1	0.914193	0
Hepatocellular-carcinoma:GCST90200459	0.563902	1.1596	0.701267	1.9175	0.867355	1	0.351689	0
Hepatocellular-carcinoma:GCST90199960	0.56504	1.06814	0.853322	1.33703	0.62432	1	0.429446	0
Hepatocellular-carcinoma:GCST90199923	0.565353	0.9068	0.649623	1.26579	1.22179	1	0.269009	0.18153
Hepatocellular-carcinoma:GCST90200156	0.565445	0.904867	0.643488	1.27242	0.301754	1	0.582785	0
Hepatocellular-carcinoma:GCST90200723	0.565774	0.911578	0.664622	1.2503	0.103779	1	0.747341	0
Hepatocellular-carcinoma:GCST90200342	0.56614	0.901666	0.633109	1.28414	0.0290799	1	0.864595	0
Hepatocellular-carcinoma:GCST90199851	0.566458	1.12526	0.751662	1.68456	1.30071	1	0.254083	0.231189
Hepatocellular-carcinoma:GCST90199738	0.566947	1.18274	0.665848	2.10089	0.118521	1	0.730645	0
Hepatocellular-carcinoma:GCST90200854	0.56738	1.12197	0.756299	1.66444	0.621877	1	0.430351	0
Hepatocellular-carcinoma:GCST90200116	0.567579	1.09473	0.802666	1.49306	0.169037	1	0.680969	0
Hepatocellular-carcinoma:GCST90200181	0.567719	0.870686	0.541482	1.40003	0.641773	1	0.423069	0
Hepatocellular-carcinoma:GCST90199841	0.567971	1.05514	0.877611	1.26858	0.351866	1	0.553059	0
Hepatocellular-carcinoma:GCST90199927	0.568568	1.12002	0.758599	1.65362	0.141009	1	0.70728	0
Hepatocellular-carcinoma:GCST90199673	0.569605	0.916611	0.678959	1.23745	0.00310437	1	0.955567	0
Hepatocellular-carcinoma:GCST90200000	0.571944	0.910878	0.658987	1.25905	0.0493523	1	0.824194	0
Hepatocellular-carcinoma:GCST90200845	0.571965	1.19991	0.637766	2.25755	0.155899	1	0.692961	0
Hepatocellular-carcinoma:GCST90199953	0.572977	1.13592	0.729277	1.76932	0.331316	1	0.564885	0
Hepatocellular-carcinoma:GCST90200169	0.573414	0.843348	0.466047	1.5261	1.82428	1	0.176805	0.451837
Hepatocellular-carcinoma:GCST90199679	0.575228	0.883289	0.572256	1.36337	0.00602439	1	0.938133	0
Hepatocellular-carcinoma:GCST90200137	0.576859	1.07898	0.826132	1.40922	0.300525	1	0.583554	0
Hepatocellular-carcinoma:GCST90200395	0.577793	0.901029	0.624257	1.30051	0.460035	1	0.497607	0
Hepatocellular-carcinoma:GCST90200585	0.579001	0.911798	0.658025	1.26344	0.496641	1	0.48098	0
Hepatocellular-carcinoma:GCST90200813	0.580316	0.785011	0.332843	1.85145	2.83746	1	0.0920899	0.647572
Hepatocellular-carcinoma:GCST90200817	0.580788	0.856133	0.493311	1.48581	0.140699	1	0.707588	0
Hepatocellular-carcinoma:GCST90200017	0.581477	1.13611	0.721723	1.78841	1.228	1	0.267795	0.185671
Hepatocellular-carcinoma:GCST90199727	0.582009	1.34034	0.472334	3.80348	3.3444	1	0.0674342	0.700992
Hepatocellular-carcinoma:GCST90199813	0.582482	0.931816	0.724416	1.19859	0.674827	1	0.411374	0
Hepatocellular-carcinoma:GCST90200575	0.582979	0.851372	0.479358	1.5121	3.92121	1	0.0476806	0.744977
Hepatocellular-carcinoma:GCST90200152	0.58353	1.08263	0.815097	1.43798	0.000102443	1	0.991924	0
Hepatocellular-carcinoma:GCST90199826	0.584223	0.899982	0.617044	1.31266	0.296589	1	0.586028	0
Hepatocellular-carcinoma:GCST90199674	0.584521	1.1692	0.667642	2.04754	0.558856	1	0.454722	0
Hepatocellular-carcinoma:GCST90200998	0.585382	0.863028	0.508372	1.4651	0.207232	1	0.648946	0
Hepatocellular-carcinoma:GCST90200672	0.587351	1.07108	0.835828	1.37254	1.09261	1	0.295894	0.0847577
Hepatocellular-carcinoma:GCST90200159	0.588035	1.10931	0.76214	1.61464	0.00121169	1	0.972232	0
Hepatocellular-carcinoma:GCST90200393	0.5891	1.11012	0.759872	1.62181	0.00382619	1	0.950677	0
Hepatocellular-carcinoma:GCST90199775	0.589492	1.16722	0.665619	2.04682	0.717779	1	0.396873	0
Hepatocellular-carcinoma:GCST90199663	0.58951	1.13297	0.719882	1.78311	0.0572796	1	0.810848	0
Hepatocellular-carcinoma:GCST90199853	0.589758	1.073	0.830547	1.38624	0.00035473	1	0.984973	0
Hepatocellular-carcinoma:GCST90200450	0.591828	1.09531	0.785261	1.52778	0.256503	1	0.612533	0
Hepatocellular-carcinoma:GCST90200999	0.592701	1.12831	0.724992	1.75599	0.0308668	1	0.860538	0
Hepatocellular-carcinoma:GCST90199696	0.592964	1.11784	0.743002	1.68178	3.01e-05	1	0.995621	0
Hepatocellular-carcinoma:GCST90199645	0.59487	0.910152	0.643316	1.28767	0.116859	1	0.732467	0
Hepatocellular-carcinoma:GCST90200217	0.594949	0.901149	0.61399	1.32261	0.465018	1	0.495288	0
Hepatocellular-carcinoma:GCST90199895	0.596358	1.17124	0.652562	2.10217	0.0400057	1	0.84147	0
Hepatocellular-carcinoma:GCST90200892	0.597616	0.870229	0.519372	1.4581	0.758819	1	0.383698	0
Hepatocellular-carcinoma:GCST90200646	0.598857	1.07505	0.820979	1.40775	0.030216	1	0.862001	0
Hepatocellular-carcinoma:GCST90200888	0.59923	1.16069	0.665802	2.02343	1.83831	1	0.175149	0.456023
Hepatocellular-carcinoma:GCST90199716	0.599326	1.11851	0.736512	1.69864	1.60869	1	0.204675	0.378378
Hepatocellular-carcinoma:GCST90200455	0.600146	1.12921	0.716875	1.77873	1.23348	1	0.266732	0.189282
Hepatocellular-carcinoma:GCST90200125	0.601254	0.844737	0.448639	1.59055	2.23275	1	0.135114	0.552121
Hepatocellular-carcinoma:GCST90199951	0.602582	1.09495	0.778237	1.54055	1.09517	1	0.29533	0.086896
Hepatocellular-carcinoma:GCST90200704	0.607017	1.06058	0.847624	1.32704	1.1929	1	0.274746	0.161704
Hepatocellular-carcinoma:GCST90200066	0.607024	1.13376	0.702681	1.82929	0.268101	1	0.604608	0
Hepatocellular-carcinoma:GCST90199721	0.607655	1.13693	0.696577	1.85567	0.0501871	1	0.822738	0
Hepatocellular-carcinoma:GCST90200822	0.607656	1.1273	0.713484	1.78112	1.22908	1	0.267585	0.186387
Hepatocellular-carcinoma:GCST90199894	0.607662	0.872997	0.519789	1.46622	0.215177	1	0.642739	0
Hepatocellular-carcinoma:GCST90200802	0.608085	0.762365	0.270263	2.15049	5.65142	1	0.0174412	0.823053
Hepatocellular-carcinoma:GCST90200484	0.608462	1.09855	0.766723	1.574	0.0924336	1	0.761106	0
Hepatocellular-carcinoma:GCST90200957	0.608813	0.855896	0.471637	1.55322	3.49625	1	0.0615079	0.713979
Hepatocellular-carcinoma:GCST90200966	0.6099	1.11522	0.733553	1.69546	0.647809	1	0.420897	0
Hepatocellular-carcinoma:GCST90200674	0.61455	1.03988	0.893073	1.21082	0.504014	1	0.477741	0
Hepatocellular-carcinoma:GCST90200054	0.614562	1.07473	0.811865	1.42269	0.740986	1	0.389345	0
Hepatocellular-carcinoma:GCST90200222	0.614988	1.09321	0.772473	1.54712	0.646751	1	0.421277	0
Hepatocellular-carcinoma:GCST90200214	0.615056	1.167	0.639228	2.13053	2.18098	1	0.139725	0.541491
Hepatocellular-carcinoma:GCST90200412	0.615448	1.12709	0.706676	1.79762	9.31e-06	1	0.997565	0
Hepatocellular-carcinoma:GCST90200696	0.617281	0.957882	0.809121	1.13399	0.00482096	1	0.944645	0
Hepatocellular-carcinoma:GCST90200773	0.617287	1.10219	0.752522	1.61432	0.3169	1	0.573477	0
Hepatocellular-carcinoma:GCST90199766	0.617299	1.2288	0.547649	2.75713	1.47926	1	0.223891	0.323984
Hepatocellular-carcinoma:GCST90200962	0.619715	1.08823	0.779276	1.51967	0.85892	1	0.354041	0
Hepatocellular-carcinoma:GCST90200263	0.620474	0.853364	0.455573	1.59849	2.63401	1	0.104597	0.620351
Hepatocellular-carcinoma:GCST90200835	0.621643	1.13982	0.677818	1.91674	2.21639	1	0.136552	0.548816
Hepatocellular-carcinoma:GCST90200537	0.622183	0.928103	0.689779	1.24877	0.78413	1	0.375881	0
Hepatocellular-carcinoma:GCST90200728	0.622373	1.08247	0.789671	1.48385	0.546197	1	0.459876	0
Hepatocellular-carcinoma:GCST90199661	0.623319	0.894967	0.574766	1.39355	0.994706	1	0.318595	0
Hepatocellular-carcinoma:GCST90199772	0.623365	1.13046	0.692955	1.8442	2.94926	1	0.085917	0.660932
Hepatocellular-carcinoma:GCST90200844	0.623404	0.858042	0.4657	1.58092	1.84191	1	0.174727	0.457085
Hepatocellular-carcinoma:GCST90199767	0.623574	1.10403	0.743604	1.63914	0.380814	1	0.537168	0
Hepatocellular-carcinoma:GCST90200205	0.624735	1.09671	0.757615	1.58758	1.6498	1	0.198987	0.393865
Hepatocellular-carcinoma:GCST90200855	0.625224	1.31035	0.442959	3.87626	5.61178	1	0.0178402	0.821803
Hepatocellular-carcinoma:GCST90200959	0.625511	0.898849	0.585732	1.37935	0.0955791	1	0.757201	0
Hepatocellular-carcinoma:GCST90200444	0.625622	0.937369	0.722888	1.21549	0.578021	1	0.447089	0
Hepatocellular-carcinoma:GCST90199879	0.625998	0.890848	0.559677	1.41798	2.05866	1	0.151343	0.514247
Hepatocellular-carcinoma:GCST90199757	0.62667	1.29598	0.455932	3.68379	8.02197	1	0.00462133	0.875342
Hepatocellular-carcinoma:GCST90200253	0.626909	1.07806	0.796206	1.45968	1.05239	1	0.304958	0.0497796
Hepatocellular-carcinoma:GCST90200908	0.627184	0.897128	0.578901	1.39029	0.105299	1	0.745561	0
Hepatocellular-carcinoma:GCST90200890	0.630441	0.897362	0.577252	1.39499	0.434249	1	0.509911	0
Hepatocellular-carcinoma:GCST90200267	0.630575	1.09326	0.760165	1.57231	0.803353	1	0.370093	0
Hepatocellular-carcinoma:GCST90199790	0.630781	1.09903	0.74779	1.61524	0.00115099	1	0.972936	0
Hepatocellular-carcinoma:GCST90200298	0.632373	1.27098	0.475869	3.39459	3.30484	1	0.0690762	0.697413
Hepatocellular-carcinoma:GCST90200127	0.632602	0.930054	0.690873	1.25204	0.0936185	1	0.759626	0
Hepatocellular-carcinoma:GCST90199812	0.633068	0.795229	0.310436	2.03709	3.00057	1	0.0832354	0.66673
Hepatocellular-carcinoma:GCST90199723	0.633858	0.853444	0.444595	1.63827	0.608128	1	0.435493	0
Hepatocellular-carcinoma:GCST90200938	0.634312	0.90015	0.58354	1.38854	0.113851	1	0.735802	0
Hepatocellular-carcinoma:GCST90200188	0.635629	1.11806	0.704664	1.77399	0.307343	1	0.579315	0
Hepatocellular-carcinoma:GCST90200736	0.635644	0.94262	0.738203	1.20364	0.0447787	1	0.832411	0
Hepatocellular-carcinoma:GCST90200284	0.636034	1.13825	0.665784	1.94599	0.517646	1	0.471848	0
Hepatocellular-carcinoma:GCST90200454	0.636436	0.926365	0.674601	1.27209	1.1666	1	0.2801	0.142811
Hepatocellular-carcinoma:GCST90199703	0.636732	0.797992	0.312813	2.03569	4.59663	1	0.0320348	0.782449
Hepatocellular-carcinoma:GCST90200335	0.636912	0.936406	0.712813	1.23014	0.473405	1	0.491425	0
Hepatocellular-carcinoma:GCST90200851	0.638611	0.921373	0.654657	1.29675	0.000749085	1	0.978165	0
Hepatocellular-carcinoma:GCST90200944	0.638675	1.11212	0.713699	1.73294	0.308558	1	0.578567	0
Hepatocellular-carcinoma:GCST90200286	0.640378	0.904546	0.593799	1.37791	0.309229	1	0.578154	0
Hepatocellular-carcinoma:GCST90200526	0.641031	1.24856	0.491072	3.17448	2.26807	1	0.132065	0.559096
Hepatocellular-carcinoma:GCST90199819	0.641304	1.1159	0.703507	1.77002	2.23722	1	0.134723	0.553016
Hepatocellular-carcinoma:GCST90200494	0.642237	1.13465	0.665898	1.93338	1.21468	1	0.270407	0.176739
Hepatocellular-carcinoma:GCST90199896	0.643087	1.08116	0.777229	1.50394	0.0659022	1	0.797399	0
Hepatocellular-carcinoma:GCST90200236	0.643207	1.0788	0.78264	1.48703	0.347434	1	0.555569	0
Hepatocellular-carcinoma:GCST90200460	0.64538	0.910869	0.612038	1.35561	0.392998	1	0.530727	0
Hepatocellular-carcinoma:GCST90200701	0.647752	0.917013	0.632374	1.32977	2.21674	1	0.136521	0.548887
Hepatocellular-carcinoma:GCST90199629	0.647971	0.916414	0.630033	1.33297	0.0879844	1	0.766755	0
Hepatocellular-carcinoma:GCST90200399	0.648565	0.875381	0.493874	1.55159	0.514009	1	0.473409	0
Hepatocellular-carcinoma:GCST90200433	0.649038	0.886686	0.52824	1.48836	0.279533	1	0.597007	0
Hepatocellular-carcinoma:GCST90199728	0.649671	1.14196	0.643998	2.02497	0.114414	1	0.735174	0
Hepatocellular-carcinoma:GCST90199938	0.650426	1.09861	0.731461	1.65005	0.0999051	1	0.751944	0
Hepatocellular-carcinoma:GCST90200785	0.651051	1.10704	0.712505	1.72005	1.95939	1	0.161579	0.489637
Hepatocellular-carcinoma:GCST90200258	0.651916	1.12948	0.665471	1.91703	1.77421	1	0.182862	0.436368
Hepatocellular-carcinoma:GCST90201006	0.651981	0.782372	0.269289	2.27304	3.47688	1	0.0622321	0.712385
Hepatocellular-carcinoma:GCST90200605	0.65202	0.920778	0.643225	1.31809	1.24954	1	0.263641	0.199705
Hepatocellular-carcinoma:GCST90200997	0.652068	1.07494	0.78517	1.47165	0.113972	1	0.735666	0
Hepatocellular-carcinoma:GCST90200155	0.652125	0.747713	0.211242	2.6466	6.2863	1	0.0121675	0.840924
Hepatocellular-carcinoma:GCST90200731	0.652198	0.935565	0.700304	1.24986	0.646704	1	0.421294	0
Hepatocellular-carcinoma:GCST90200323	0.654083	1.06187	0.816653	1.38072	0.663874	1	0.415196	0
Hepatocellular-carcinoma:GCST90200388	0.654333	0.893709	0.546467	1.4616	0.516367	1	0.472396	0
Hepatocellular-carcinoma:GCST90200439	0.654514	1.2415	0.481372	3.20193	3.27161	1	0.0704886	0.69434
Hepatocellular-carcinoma:GCST90200655	0.654977	0.850645	0.418426	1.72933	0.0717583	1	0.788794	0
Hepatocellular-carcinoma:GCST90200387	0.655882	1.08153	0.766161	1.52672	0.262885	1	0.608145	0
Hepatocellular-carcinoma:GCST90200954	0.656072	0.87902	0.498351	1.55047	2.02596	1	0.154631	0.506407
Hepatocellular-carcinoma:GCST90200290	0.656473	1.07647	0.778018	1.4894	0.448268	1	0.503159	0
Hepatocellular-carcinoma:GCST90199739	0.65917	1.14473	0.627835	2.08717	0.600221	1	0.438494	0
Hepatocellular-carcinoma:GCST90200832	0.660528	1.08169	0.761935	1.53562	1.13178	1	0.287396	0.116434
Hepatocellular-carcinoma:GCST90200403	0.661144	1.14525	0.624493	2.10028	2.06479	1	0.150736	0.51569
Hepatocellular-carcinoma:GCST90200918	0.661433	0.911493	0.602049	1.37999	0.00615782	1	0.937453	0
Hepatocellular-carcinoma:GCST90200050	0.662843	1.1129	0.688037	1.80013	0.145041	1	0.70332	0
Hepatocellular-carcinoma:GCST90201010	0.665309	1.12023	0.669752	1.8737	0.654122	1	0.418643	0
Hepatocellular-carcinoma:GCST90200288	0.665371	0.948645	0.747047	1.20465	0.573237	1	0.448976	0
Hepatocellular-carcinoma:GCST90199891	0.665675	1.24232	0.464289	3.32415	6.13256	1	0.0132715	0.836936
Hepatocellular-carcinoma:GCST90199758	0.665895	1.05588	0.824944	1.35146	0.0160784	1	0.899098	0
Hepatocellular-carcinoma:GCST90199929	0.667602	1.14836	0.610774	2.15912	1.81568	1	0.177829	0.449241
Hepatocellular-carcinoma:GCST90199889	0.667743	1.06293	0.804424	1.40451	0.237195	1	0.62624	0
Hepatocellular-carcinoma:GCST90200905	0.667998	0.875904	0.478074	1.60479	0.151478	1	0.697127	0
Hepatocellular-carcinoma:GCST90200397	0.668143	1.14106	0.624161	2.08604	0.0381998	1	0.845043	0
Hepatocellular-carcinoma:GCST90199781	0.668458	1.04678	0.849161	1.29038	0.0345838	1	0.852471	0
Hepatocellular-carcinoma:GCST90200591	0.670544	0.893912	0.533203	1.49864	1.66012	1	0.197587	0.397636
Hepatocellular-carcinoma:GCST90200179	0.670637	1.04188	0.862383	1.25874	0.554008	1	0.456685	0
Hepatocellular-carcinoma:GCST90199950	0.671173	0.930699	0.668053	1.2966	0.137877	1	0.710401	0
Hepatocellular-carcinoma:GCST90200788	0.671786	1.09972	0.708474	1.70701	2.38893	1	0.122197	0.581402
Hepatocellular-carcinoma:GCST90200871	0.672149	1.11296	0.677977	1.82704	1.44808	1	0.228836	0.309433
Hepatocellular-carcinoma:GCST90200659	0.673738	1.06263	0.800887	1.40991	0.0407852	1	0.839953	0
Hepatocellular-carcinoma:GCST90200204	0.67391	0.89954	0.549358	1.47294	0.225155	1	0.63514	0
Hepatocellular-carcinoma:GCST90200891	0.674266	0.896665	0.539179	1.49117	0.768512	1	0.380678	0
Hepatocellular-carcinoma:GCST90200135	0.674776	1.07301	0.772067	1.49126	0.261617	1	0.609011	0
Hepatocellular-carcinoma:GCST90199779	0.675477	0.897424	0.540687	1.48953	1.52354	1	0.217084	0.343635
Hepatocellular-carcinoma:GCST90199900	0.675539	0.922485	0.632231	1.34599	0.0268513	1	0.869838	0
Hepatocellular-carcinoma:GCST90199747	0.67598	0.860625	0.425726	1.7398	2.56769	1	0.109067	0.610545
Hepatocellular-carcinoma:GCST90199952	0.676423	0.906638	0.57218	1.4366	0.838052	1	0.359955	0
Hepatocellular-carcinoma:GCST90200931	0.676623	1.20177	0.506662	2.85051	3.24621	1	0.0715888	0.691948
Hepatocellular-carcinoma:GCST90199647	0.677619	1.08913	0.728215	1.62892	0.0373366	1	0.846781	0
Hepatocellular-carcinoma:GCST90200416	0.678724	1.06222	0.798321	1.41334	0.637194	1	0.424729	0
Hepatocellular-carcinoma:GCST90200506	0.679928	0.910657	0.583798	1.42052	0.341323	1	0.559066	0
Hepatocellular-carcinoma:GCST90200360	0.680342	1.12231	0.648199	1.94321	0.077743	1	0.78038	0
Hepatocellular-carcinoma:GCST90200056	0.681131	1.07646	0.757488	1.52975	0.201502	1	0.653511	0
Hepatocellular-carcinoma:GCST90199983	0.681595	1.08735	0.728846	1.62219	0.314579	1	0.574884	0
Hepatocellular-carcinoma:GCST90200941	0.681646	1.16418	0.563096	2.40691	1.86737	1	0.171777	0.464486
Hepatocellular-carcinoma:GCST90200910	0.681888	0.927458	0.647001	1.32949	0.104068	1	0.747002	0
Hepatocellular-carcinoma:GCST90200970	0.682373	1.11878	0.65355	1.9152	0.519288	1	0.471146	0
Hepatocellular-carcinoma:GCST90200792	0.683429	0.889616	0.507053	1.56082	2.00056	1	0.157241	0.500139
Hepatocellular-carcinoma:GCST90200917	0.683696	1.14434	0.598226	2.18901	0.0207189	1	0.885547	0
Hepatocellular-carcinoma:GCST90200805	0.684098	0.931239	0.660731	1.31249	0.0643363	1	0.799769	0
Hepatocellular-carcinoma:GCST90200868	0.684683	0.797569	0.267701	2.37622	5.51615	1	0.0188417	0.818714
Hepatocellular-carcinoma:GCST90200350	0.68729	0.70975	0.133699	3.76774	7.95276	1	0.00480141	0.874257
Hepatocellular-carcinoma:GCST90200863	0.687454	1.10006	0.691276	1.75057	1.70693	1	0.191384	0.414154
Hepatocellular-carcinoma:GCST90200256	0.688598	1.02966	0.89251	1.18788	0.545774	1	0.46005	0
Hepatocellular-carcinoma:GCST90200768	0.690394	1.06171	0.790757	1.4255	0.509733	1	0.475254	0
Hepatocellular-carcinoma:GCST90200886	0.691707	1.10853	0.666148	1.8447	0.616003	1	0.432536	0
Hepatocellular-carcinoma:GCST90199633	0.692513	0.933568	0.664018	1.31254	0.0449499	1	0.832096	0
Hepatocellular-carcinoma:GCST90199861	0.692853	1.06927	0.766914	1.49084	0.0894976	1	0.764817	0
Hepatocellular-carcinoma:GCST90200765	0.693559	0.922966	0.61946	1.37518	0.862587	1	0.353016	0
Hepatocellular-carcinoma:GCST90200956	0.693775	1.0874	0.716547	1.6502	0.000773844	1	0.977807	0
Hepatocellular-carcinoma:GCST90199735	0.695156	1.04202	0.848148	1.2802	0.388201	1	0.533246	0
Hepatocellular-carcinoma:GCST90199954	0.695313	1.04199	0.84813	1.28017	0.294621	1	0.587275	0
Hepatocellular-carcinoma:GCST90200013	0.696493	0.91039	0.568006	1.45916	0.151447	1	0.697156	0
Hepatocellular-carcinoma:GCST90199992	0.697618	0.943112	0.701859	1.26729	1.53323	1	0.215628	0.347782
Hepatocellular-carcinoma:GCST90200333	0.698298	1.07686	0.740531	1.56595	0.221293	1	0.638056	0
Hepatocellular-carcinoma:GCST90201004	0.698747	0.918245	0.596166	1.41433	1.08855	1	0.296792	0.0813508
Hepatocellular-carcinoma:GCST90199641	0.699013	0.892224	0.500522	1.59047	0.11833	1	0.730853	0
Hepatocellular-carcinoma:GCST90200831	0.700175	0.828151	0.317184	2.16226	2.95622	1	0.0855477	0.66173
Hepatocellular-carcinoma:GCST90199665	0.700738	1.45939	0.212293	10.0325	14.8996	1	0.000113389	0.932884
Hepatocellular-carcinoma:GCST90200148	0.700744	1.06302	0.778364	1.45178	0.528264	1	0.467338	0
Hepatocellular-carcinoma:GCST90200157	0.700986	0.922423	0.610839	1.39294	0.00663594	1	0.935075	0
Hepatocellular-carcinoma:GCST90200458	0.70279	1.13301	0.596542	2.15194	2.95291	1	0.0857232	0.661351
Hepatocellular-carcinoma:GCST90200304	0.704001	1.21234	0.448966	3.2737	5.34685	1	0.0207597	0.812974
Hepatocellular-carcinoma:GCST90199880	0.704341	1.05092	0.813148	1.35821	0.0159969	1	0.899353	0
Hepatocellular-carcinoma:GCST90200856	0.706182	0.943171	0.695804	1.27848	0.341306	1	0.559076	0
Hepatocellular-carcinoma:GCST90200519	0.706405	1.07038	0.751358	1.52486	0.659563	1	0.416714	0
Hepatocellular-carcinoma:GCST90200336	0.707083	1.11614	0.629259	1.97974	1.83183	1	0.175912	0.454097
Hepatocellular-carcinoma:GCST90200119	0.707816	0.940059	0.680411	1.29879	0.256533	1	0.612512	0
Hepatocellular-carcinoma:GCST90200556	0.708287	0.932449	0.646414	1.34505	0.749195	1	0.386731	0
Hepatocellular-carcinoma:GCST90200072	0.708975	0.928217	0.627721	1.37256	0.886399	1	0.346455	0
Hepatocellular-carcinoma:GCST90200265	0.709249	0.959894	0.774067	1.19033	0.613331	1	0.433536	0
Hepatocellular-carcinoma:GCST90200993	0.710042	1.29806	0.32814	5.13485	3.64201	1	0.0563389	0.725426
Hepatocellular-carcinoma:GCST90199712	0.710588	0.889691	0.479866	1.64952	1.03458	1	0.309085	0.0334274
Hepatocellular-carcinoma:GCST90200020	0.710741	0.90798	0.545147	1.5123	1.37e-06	1	0.999066	0
Hepatocellular-carcinoma:GCST90200015	0.711077	1.04467	0.828991	1.31647	0.744385	1	0.38826	0
Hepatocellular-carcinoma:GCST90200259	0.712308	0.926277	0.61655	1.3916	0.00361388	1	0.952064	0
Hepatocellular-carcinoma:GCST90200094	0.712647	0.873761	0.426095	1.79175	3.0264	1	0.0819194	0.669575
Hepatocellular-carcinoma:GCST90201016	0.712692	1.03761	0.852493	1.26293	0.546006	1	0.459954	0
Hepatocellular-carcinoma:GCST90200665	0.712885	1.13076	0.587642	2.17583	5.06061	1	0.0244756	0.802395
Hepatocellular-carcinoma:GCST90199982	0.713148	1.13887	0.56936	2.27805	0.0920133	1	0.761633	0
Hepatocellular-carcinoma:GCST90200415	0.713252	0.927111	0.619203	1.38813	1.9976	1	0.157549	0.499399
Hepatocellular-carcinoma:GCST90200756	0.714428	0.942621	0.686875	1.29359	0.846064	1	0.357668	0
Hepatocellular-carcinoma:GCST90200661	0.715022	1.07078	0.74178	1.54569	0.89432	1	0.344309	0
Hepatocellular-carcinoma:GCST90200865	0.715274	0.915389	0.569266	1.47196	0.0505236	1	0.822155	0
Hepatocellular-carcinoma:GCST90200933	0.717426	0.884716	0.45573	1.71751	1.37533	1	0.240898	0.272901
Hepatocellular-carcinoma:GCST90199822	0.717849	0.92468	0.604675	1.41404	0.00561237	1	0.940282	0
Hepatocellular-carcinoma:GCST90200599	0.71835	1.08762	0.689053	1.71672	0.0793977	1	0.778115	0
Hepatocellular-carcinoma:GCST90199980	0.718671	1.07466	0.726313	1.59009	1.10958	1	0.292173	0.0987581
Hepatocellular-carcinoma:GCST90199986	0.719655	1.069	0.742563	1.53895	0.159317	1	0.689786	0
Hepatocellular-carcinoma:GCST90200609	0.720923	1.12671	0.585519	2.16811	1.37464	1	0.241016	0.272537
Hepatocellular-carcinoma:GCST90200819	0.721182	0.851818	0.353033	2.05532	1.87263	1	0.171174	0.465992
Hepatocellular-carcinoma:GCST90199797	0.721894	0.900714	0.506422	1.60199	1.05994	1	0.303229	0.0565501
Hepatocellular-carcinoma:GCST90200695	0.722441	1.02948	0.876977	1.20851	0.365285	1	0.545586	0
Hepatocellular-carcinoma:GCST90200090	0.723247	1.07477	0.721092	1.60192	0.78135	1	0.376729	0
Hepatocellular-carcinoma:GCST90200809	0.723456	1.10007	0.648624	1.86572	0.0968261	1	0.755672	0
Hepatocellular-carcinoma:GCST90200730	0.723843	1.04372	0.823183	1.32334	0.00719046	1	0.932423	0
Hepatocellular-carcinoma:GCST90199906	0.72443	0.841219	0.321694	2.19976	3.80828	1	0.0509997	0.737414
Hepatocellular-carcinoma:GCST90199924	0.724698	0.952611	0.727075	1.24811	0.131508	1	0.716873	0
Hepatocellular-carcinoma:GCST90200260	0.72512	0.915399	0.559277	1.49828	0.935702	1	0.333386	0
Hepatocellular-carcinoma:GCST90199624	0.725303	1.10967	0.621023	1.9828	0.0200429	1	0.887417	0
Hepatocellular-carcinoma:GCST90200727	0.72747	1.09041	0.670176	1.77414	0.308379	1	0.578677	0
Hepatocellular-carcinoma:GCST90199970	0.727694	0.956757	0.745994	1.22707	0.763935	1	0.3821	0
Hepatocellular-carcinoma:GCST90200170	0.727907	0.948535	0.704343	1.27739	1.64705	1	0.199361	0.392853
Hepatocellular-carcinoma:GCST90200083	0.728825	0.962262	0.774182	1.19603	0.146614	1	0.701793	0
Hepatocellular-carcinoma:GCST90199700	0.729666	0.904585	0.512203	1.59756	0.00138498	1	0.970313	0
Hepatocellular-carcinoma:GCST90199671	0.730374	0.919119	0.56893	1.48486	0.309738	1	0.577841	0
Hepatocellular-carcinoma:GCST90199653	0.730981	0.910294	0.532716	1.55549	0.117725	1	0.731515	0
Hepatocellular-carcinoma:GCST90200093	0.732159	0.933819	0.630912	1.38215	0.0960152	1	0.756665	0
Hepatocellular-carcinoma:GCST90200182	0.733675	0.914941	0.548273	1.52682	1.76746	1	0.183697	0.434216
Hepatocellular-carcinoma:GCST90200542	0.733742	0.937564	0.646651	1.35935	0.866421	1	0.351948	0
Hepatocellular-carcinoma:GCST90199905	0.734425	0.91798	0.559894	1.50508	0.676073	1	0.410942	0
Hepatocellular-carcinoma:GCST90200325	0.735503	0.88993	0.452403	1.7506	0.241003	1	0.623482	0
Hepatocellular-carcinoma:GCST90200840	0.736272	1.0468	0.802164	1.36605	0.0312052	1	0.859783	0
Hepatocellular-carcinoma:GCST90200231	0.736366	0.947581	0.692607	1.29642	0.105685	1	0.745111	0
Hepatocellular-carcinoma:GCST90200604	0.736538	1.05904	0.758205	1.47923	0.00186284	1	0.965573	0
Hepatocellular-carcinoma:GCST90200837	0.739305	0.954567	0.725892	1.25528	0.0319121	1	0.858221	0
Hepatocellular-carcinoma:GCST90199869	0.73949	0.863275	0.362914	2.0535	2.74302	1	0.0976799	0.635439
Hepatocellular-carcinoma:GCST90200850	0.740276	1.06395	0.737462	1.53499	0.684032	1	0.408202	0
Hepatocellular-carcinoma:GCST90200294	0.740852	1.01581	0.925617	1.1148	0.202952	1	0.652349	0
Hepatocellular-carcinoma:GCST90199687	0.741632	0.94013	0.651319	1.35701	0.0299266	1	0.862657	0
Hepatocellular-carcinoma:GCST90201018	0.741917	0.962699	0.767771	1.20712	0.00653282	1	0.93558	0
Hepatocellular-carcinoma:GCST90199636	0.741935	1.10452	0.611219	1.99596	2.24407	1	0.134128	0.554381
Hepatocellular-carcinoma:GCST90200113	0.74203	0.918404	0.553254	1.52455	0.502694	1	0.478319	0
Hepatocellular-carcinoma:GCST90200762	0.743603	0.910026	0.517244	1.60108	0.612457	1	0.433864	0
Hepatocellular-carcinoma:GCST90200487	0.744408	1.06787	0.719562	1.58478	0.994362	1	0.318679	0
Hepatocellular-carcinoma:GCST90200964	0.745378	0.933608	0.616729	1.4133	1.24557	1	0.264401	0.197154
Hepatocellular-carcinoma:GCST90199868	0.745814	1.04215	0.811936	1.33764	0.116318	1	0.733063	0
Hepatocellular-carcinoma:GCST90199675	0.747165	1.03962	0.820886	1.31664	0.423277	1	0.515306	0
Hepatocellular-carcinoma:GCST90199858	0.749088	0.9775	0.850265	1.12378	0.285581	1	0.593066	0
Hepatocellular-carcinoma:GCST90199656	0.74966	1.09921	0.614825	1.96521	1.09043	1	0.296375	0.0829326
Hepatocellular-carcinoma:GCST90200629	0.749819	1.09521	0.62622	1.91544	2.50249	1	0.113666	0.600398
Hepatocellular-carcinoma:GCST90199957	0.749864	0.927219	0.582685	1.47547	0.003689	1	0.951569	0
Hepatocellular-carcinoma:GCST90200003	0.750249	0.899614	0.468989	1.72564	1.60869	1	0.204675	0.378378
Hepatocellular-carcinoma:GCST90200105	0.750289	0.956632	0.728053	1.25697	0.645479	1	0.421734	0
Hepatocellular-carcinoma:GCST90199904	0.750822	0.902627	0.479628	1.69868	1.53573	1	0.215254	0.348845
Hepatocellular-carcinoma:GCST90200896	0.75124	0.951325	0.698781	1.29514	0.571285	1	0.449749	0
Hepatocellular-carcinoma:GCST90199750	0.751308	0.939326	0.637823	1.38335	0.784549	1	0.375753	0
Hepatocellular-carcinoma:GCST90199885	0.752488	0.934879	0.615179	1.42072	0.36278	1	0.546966	0
Hepatocellular-carcinoma:GCST90200305	0.752832	1.06271	0.727808	1.55171	0.400226	1	0.526973	0
Hepatocellular-carcinoma:GCST90200499	0.753047	1.07646	0.680246	1.70345	0.0185451	1	0.891679	0
Hepatocellular-carcinoma:GCST90200617	0.753434	0.938971	0.633884	1.39089	0.548455	1	0.45895	0
Hepatocellular-carcinoma:GCST90199995	0.753738	0.907626	0.495368	1.66298	2.32962	1	0.126933	0.570746
Hepatocellular-carcinoma:GCST90199764	0.753802	0.764454	0.142686	4.09564	5.49881	1	0.0190294	0.818143
Hepatocellular-carcinoma:GCST90200733	0.757333	0.944536	0.657692	1.35648	0.298883	1	0.584583	0
Hepatocellular-carcinoma:GCST90200887	0.758325	0.91187	0.506641	1.64121	1.15266	1	0.282993	0.132442
Hepatocellular-carcinoma:GCST90200077	0.758551	0.918715	0.53507	1.57743	2.05137	1	0.152069	0.512521
Hepatocellular-carcinoma:GCST90200812	0.758552	1.24066	0.313684	4.90698	9.85206	1	0.00169642	0.898498
Hepatocellular-carcinoma:GCST90200808	0.758893	0.919887	0.539707	1.56787	0.0692157	1	0.792482	0
Hepatocellular-carcinoma:GCST90200978	0.759373	0.956408	0.719093	1.27204	0.0333171	1	0.855167	0
Hepatocellular-carcinoma:GCST90200008	0.759551	0.936097	0.613297	1.4288	0.40303	1	0.525529	0
Hepatocellular-carcinoma:GCST90200151	0.760176	0.935184	0.60818	1.43801	0.22607	1	0.634453	0
Hepatocellular-carcinoma:GCST90199824	0.763038	0.931264	0.586165	1.47954	0.629458	1	0.427554	0
Hepatocellular-carcinoma:GCST90199789	0.76337	0.908505	0.486438	1.69679	0.00216318	1	0.962904	0
Hepatocellular-carcinoma:GCST90199632	0.764787	1.07071	0.684384	1.67511	1.0153	1	0.313636	0.0150695
Hepatocellular-carcinoma:GCST90200200	0.764874	0.912727	0.501704	1.66048	0.00148855	1	0.969224	0
Hepatocellular-carcinoma:GCST90200166	0.767229	1.10133	0.581257	2.08672	4.25096	1	0.0392282	0.764759
Hepatocellular-carcinoma:GCST90199681	0.768235	1.04053	0.798904	1.35523	0.767502	1	0.380991	0
Hepatocellular-carcinoma:GCST90200381	0.768726	1.15884	0.433771	3.09591	2.16861	1	0.140853	0.538876
Hepatocellular-carcinoma:GCST90199930	0.769011	0.918137	0.519218	1.62355	0.190025	1	0.662896	0
Hepatocellular-carcinoma:GCST90199693	0.769503	1.07464	0.663987	1.73926	1.24242	1	0.265006	0.195117
Hepatocellular-carcinoma:GCST90200516	0.769893	1.08497	0.628203	1.87386	0.256432	1	0.612582	0
Hepatocellular-carcinoma:GCST90200377	0.769921	0.96008	0.730713	1.26145	0.0378889	1	0.845666	0
Hepatocellular-carcinoma:GCST90200446	0.770086	0.910587	0.485876	1.70655	0.0489284	1	0.824939	0
Hepatocellular-carcinoma:GCST90199864	0.771494	1.04806	0.763481	1.43872	1.24452	1	0.264602	0.196477
Hepatocellular-carcinoma:GCST90200469	0.772812	0.934102	0.588034	1.48384	1.4071	1	0.235538	0.289319
Hepatocellular-carcinoma:GCST90199754	0.773553	1.07035	0.673586	1.70083	0.32967	1	0.565854	0
Hepatocellular-carcinoma:GCST90200662	0.773962	1.08027	0.637807	1.82968	0.000189193	1	0.989026	0
Hepatocellular-carcinoma:GCST90200027	0.774969	0.951665	0.677599	1.33658	0.0388205	1	0.843805	0
Hepatocellular-carcinoma:GCST90200935	0.775477	0.95246	0.681529	1.3311	0.927117	1	0.335613	0
Hepatocellular-carcinoma:GCST90200960	0.776528	1.07086	0.667469	1.71804	0.261962	1	0.608775	0
Hepatocellular-carcinoma:GCST90199925	0.776731	1.05721	0.719749	1.55288	1.23188	1	0.267041	0.188234
Hepatocellular-carcinoma:GCST90200626	0.777306	1.03393	0.820496	1.30288	0.013394	1	0.907864	0
Hepatocellular-carcinoma:GCST90200430	0.778646	1.06924	0.670397	1.70538	0.603178	1	0.437368	0
Hepatocellular-carcinoma:GCST90199788	0.778905	0.958508	0.713037	1.28849	0.0691852	1	0.792527	0
Hepatocellular-carcinoma:GCST90200961	0.778982	0.950766	0.668258	1.3527	0.01093	1	0.916735	0
Hepatocellular-carcinoma:GCST90199966	0.779165	0.932362	0.571467	1.52117	1.31403	1	0.251666	0.238983
Hepatocellular-carcinoma:GCST90200498	0.779768	1.11588	0.517431	2.40648	2.21135	1	0.136999	0.547788
Hepatocellular-carcinoma:GCST90200776	0.780231	1.06797	0.672894	1.69501	0.296433	1	0.586127	0
Hepatocellular-carcinoma:GCST90200913	0.78049	1.07185	0.657953	1.74612	1.45876	1	0.227128	0.314486
Hepatocellular-carcinoma:GCST90200212	0.780514	1.05527	0.722817	1.54063	0.792002	1	0.373495	0
Hepatocellular-carcinoma:GCST90199762	0.780747	0.939122	0.603454	1.4615	0.280047	1	0.596671	0
Hepatocellular-carcinoma:GCST90200012	0.782923	0.89217	0.396222	2.00889	2.48336	1	0.115056	0.59732
Hepatocellular-carcinoma:GCST90200783	0.783139	1.0578	0.708963	1.57828	0.880563	1	0.348047	0
Hepatocellular-carcinoma:GCST90199860	0.786897	1.02743	0.844425	1.25009	0.483528	1	0.486829	0
Hepatocellular-carcinoma:GCST90200337	0.787446	0.943751	0.619572	1.43755	0.0783508	1	0.779545	0
Hepatocellular-carcinoma:GCST90200024	0.788088	1.03001	0.830241	1.27785	0.305369	1	0.580536	0
Hepatocellular-carcinoma:GCST90200067	0.78833	1.06987	0.653433	1.75171	1.58754	1	0.207678	0.370094
Hepatocellular-carcinoma:GCST90199658	0.789071	1.11219	0.510331	2.42384	2.04195	1	0.153014	0.510272
Hepatocellular-carcinoma:GCST90200111	0.790104	0.966352	0.751069	1.24334	0.57881	1	0.446779	0
Hepatocellular-carcinoma:GCST90200313	0.79105	0.918077	0.487839	1.72775	2.71097	1	0.0996602	0.631129
Hepatocellular-carcinoma:GCST90200489	0.791647	1.06922	0.650742	1.75682	0.00532647	1	0.94182	0
Hepatocellular-carcinoma:GCST90199975	0.793721	0.783871	0.126341	4.86345	8.00389	1	0.00466771	0.875061
Hepatocellular-carcinoma:GCST90200477	0.794594	0.95536	0.677424	1.34733	0.000922149	1	0.975774	0
Hepatocellular-carcinoma:GCST90200549	0.794758	0.957031	0.687412	1.3324	0.0509758	1	0.821374	0
Hepatocellular-carcinoma:GCST90199965	0.796536	1.05469	0.703626	1.58091	0.806118	1	0.36927	0
Hepatocellular-carcinoma:GCST90200276	0.796693	1.05319	0.710048	1.56216	0.0860296	1	0.769287	0
Hepatocellular-carcinoma:GCST90200262	0.797339	0.937148	0.570998	1.53809	3.30673	1	0.0689966	0.697587
Hepatocellular-carcinoma:GCST90200798	0.797463	0.906304	0.427529	1.92124	2.85443	1	0.0911227	0.649667
Hepatocellular-carcinoma:GCST90200889	0.797863	0.888722	0.360319	2.19202	3.87595	1	0.0489825	0.741999
Hepatocellular-carcinoma:GCST90200009	0.799469	0.889184	0.35929	2.20059	4.15346	1	0.0415496	0.759237
Hepatocellular-carcinoma:GCST90199967	0.800692	1.0493	0.72218	1.52459	0.013808	1	0.906458	0
Hepatocellular-carcinoma:GCST90200329	0.802925	0.862899	0.271029	2.74729	4.98324	1	0.025594	0.799327
Hepatocellular-carcinoma:GCST90200211	0.80389	0.951409	0.642128	1.40966	0.156348	1	0.692541	0
Hepatocellular-carcinoma:GCST90200939	0.80447	1.0581	0.676624	1.65465	0.0281558	1	0.866743	0
Hepatocellular-carcinoma:GCST90200632	0.804692	0.900253	0.39143	2.0705	2.49621	1	0.114121	0.599393
Hepatocellular-carcinoma:GCST90200452	0.805181	1.0486	0.719159	1.52897	0.2449	1	0.620689	0
Hepatocellular-carcinoma:GCST90199741	0.806286	0.974289	0.791173	1.19979	0.198903	1	0.655608	0
Hepatocellular-carcinoma:GCST90200590	0.806515	1.03639	0.778552	1.37963	0.367046	1	0.544619	0
Hepatocellular-carcinoma:GCST90200582	0.806757	1.10247	0.504548	2.40897	1.71738	1	0.19003	0.417719
Hepatocellular-carcinoma:GCST90200828	0.80854	0.958673	0.681413	1.34875	0.0329706	1	0.855914	0
Hepatocellular-carcinoma:GCST90200132	0.810015	1.06439	0.639951	1.77034	1.46121	1	0.226738	0.315634
Hepatocellular-carcinoma:GCST90200706	0.810205	0.975404	0.796008	1.19523	0.0366562	1	0.848167	0
Hepatocellular-carcinoma:GCST90199848	0.810432	1.03823	0.764123	1.41066	1.3449	1	0.246172	0.256449
Hepatocellular-carcinoma:GCST90199752	0.810693	0.982231	0.848206	1.13743	0.00182609	1	0.965915	0
Hepatocellular-carcinoma:GCST90200760	0.811028	1.0503	0.702446	1.5704	0.756648	1	0.384379	0
Hepatocellular-carcinoma:GCST90200713	0.812255	1.05925	0.658749	1.70324	0.0710754	1	0.789777	0
Hepatocellular-carcinoma:GCST90199684	0.812351	0.900104	0.377509	2.14614	1.78709	1	0.181281	0.440431
Hepatocellular-carcinoma:GCST90199799	0.813386	1.02381	0.842082	1.24477	0.609899	1	0.434826	0
Hepatocellular-carcinoma:GCST90200361	0.813425	1.04533	0.723357	1.51062	0.351991	1	0.552988	0
Hepatocellular-carcinoma:GCST90199657	0.813578	0.930792	0.512829	1.6894	1.76238	1	0.184328	0.432585
Hepatocellular-carcinoma:GCST90200748	0.814715	0.911203	0.418657	1.98323	2.81359	1	0.0934689	0.644582
Hepatocellular-carcinoma:GCST90200503	0.814841	0.974666	0.7863	1.20816	0.0419438	1	0.837727	0
Hepatocellular-carcinoma:GCST90199843	0.815043	1.1142	0.450262	2.75717	3.16425	1	0.0752672	0.683969
Hepatocellular-carcinoma:GCST90200509	0.815832	1.04979	0.697475	1.58006	0.0136465	1	0.907004	0
Hepatocellular-carcinoma:GCST90199955	0.816263	0.940167	0.558704	1.58208	2.81459	1	0.0934106	0.644709
Hepatocellular-carcinoma:GCST90200177	0.816482	0.933201	0.520476	1.67321	0.0018297	1	0.965881	0
Hepatocellular-carcinoma:GCST90200470	0.816606	0.967667	0.732977	1.2775	0.288557	1	0.591147	0
Hepatocellular-carcinoma:GCST90199748	0.817611	0.945292	0.586016	1.52483	0.125066	1	0.723603	0
Hepatocellular-carcinoma:GCST90200346	0.817846	1.10566	0.470347	2.59909	5.74312	1	0.0165534	0.825879
Hepatocellular-carcinoma:GCST90199732	0.819353	1.03792	0.754104	1.42856	0.33321	1	0.563775	0
Hepatocellular-carcinoma:GCST90200645	0.822228	0.97639	0.792687	1.20266	2.08064	1	0.149178	0.519379
Hepatocellular-carcinoma:GCST90200777	0.822767	0.950557	0.609932	1.48141	0.661228	1	0.416127	0
Hepatocellular-carcinoma:GCST90200958	0.824226	1.04127	0.728769	1.48777	0.40218	1	0.525966	0
Hepatocellular-carcinoma:GCST90199827	0.824865	1.05426	0.660236	1.68344	0.744923	1	0.388088	0
Hepatocellular-carcinoma:GCST90200421	0.82494	0.944257	0.568029	1.56968	1.17335	1	0.278714	0.147741
Hepatocellular-carcinoma:GCST90200440	0.82549	1.02802	0.804118	1.31426	0.00696733	1	0.933477	0
Hepatocellular-carcinoma:GCST90199805	0.826323	1.03663	0.751708	1.42956	0.000630773	1	0.979963	0
Hepatocellular-carcinoma:GCST90200608	0.826612	1.02633	0.813355	1.29508	0.000426298	1	0.983527	0
Hepatocellular-carcinoma:GCST90200758	0.826879	1.02429	0.826067	1.27008	0.170127	1	0.679999	0
Hepatocellular-carcinoma:GCST90200627	0.82723	1.06668	0.59742	1.90454	0.0356883	1	0.850161	0
Hepatocellular-carcinoma:GCST90200480	0.827325	1.03502	0.759664	1.41019	0.344252	1	0.557385	0
Hepatocellular-carcinoma:GCST90200386	0.827579	1.05453	0.653979	1.70041	0.558191	1	0.45499	0
Hepatocellular-carcinoma:GCST90200303	0.828082	0.902839	0.358905	2.27113	5.62261	1	0.0177303	0.822147
Hepatocellular-carcinoma:GCST90200598	0.829246	0.859845	0.217991	3.39157	5.32875	1	0.0209764	0.812339
Hepatocellular-carcinoma:GCST90200597	0.829856	0.95852	0.65131	1.41064	0.15648	1	0.692419	0
Hepatocellular-carcinoma:GCST90200175	0.830388	0.952135	0.607839	1.49145	0.986333	1	0.32064	0
Hepatocellular-carcinoma:GCST90200968	0.831049	1.03027	0.783418	1.35489	1.08677	1	0.297187	0.0798443
Hepatocellular-carcinoma:GCST90200577	0.831703	0.949326	0.587659	1.53358	2.05563	1	0.151645	0.513531
Hepatocellular-carcinoma:GCST90199947	0.832578	1.05588	0.637807	1.74798	0.000635307	1	0.979891	0
Hepatocellular-carcinoma:GCST90199934	0.833595	1.06372	0.597805	1.89275	1.40479	1	0.235923	0.28815
Hepatocellular-carcinoma:GCST90200282	0.836046	0.968064	0.711879	1.31644	0.193115	1	0.660336	0
Hepatocellular-carcinoma:GCST90200281	0.836479	0.953615	0.607436	1.49708	2.27932	1	0.13111	0.561272
Hepatocellular-carcinoma:GCST90200331	0.837659	0.940387	0.522344	1.693	3.6694	1	0.05542	0.727476
Hepatocellular-carcinoma:GCST90199976	0.837943	0.954879	0.613467	1.4863	0.107537	1	0.742966	0
Hepatocellular-carcinoma:GCST90200530	0.838268	1.07988	0.516296	2.25865	1.18933	1	0.275465	0.15919
Hepatocellular-carcinoma:GCST90199780	0.838825	1.06674	0.572395	1.98801	2.18454	1	0.139403	0.542237
Hepatocellular-carcinoma:GCST90199881	0.838933	1.08206	0.505782	2.31495	1.88577	1	0.169679	0.469714
Hepatocellular-carcinoma:GCST90199740	0.839065	1.05474	0.630638	1.76404	0.267897	1	0.604746	0
Hepatocellular-carcinoma:GCST90200894	0.839093	0.965963	0.691504	1.34936	0.660824	1	0.416269	0
Hepatocellular-carcinoma:GCST90200697	0.839637	1.0145	0.882501	1.16623	0.0497613	1	0.823479	0
Hepatocellular-carcinoma:GCST90199920	0.841638	1.0643	0.577548	1.96127	0.671148	1	0.412652	0
Hepatocellular-carcinoma:GCST90200087	0.842188	1.04801	0.660507	1.66285	1.35992	1	0.243552	0.264661
Hepatocellular-carcinoma:GCST90199726	0.842265	0.927318	0.441019	1.94984	2.41639	1	0.120071	0.58616
Hepatocellular-carcinoma:GCST90201020	0.842472	1.03199	0.756458	1.40789	1.69255	1	0.193265	0.409176
Hepatocellular-carcinoma:GCST90199835	0.844577	0.975777	0.763629	1.24686	0.0874482	1	0.767447	0
Hepatocellular-carcinoma:GCST90200233	0.845816	0.963842	0.664965	1.39705	0.544358	1	0.460632	0
Hepatocellular-carcinoma:GCST90200193	0.847053	0.974776	0.751903	1.26371	0.0253062	1	0.873606	0
Hepatocellular-carcinoma:GCST90200312	0.847607	0.932613	0.457813	1.89983	2.28673	1	0.130485	0.562694
Hepatocellular-carcinoma:GCST90199759	0.847608	1.03289	0.742506	1.43685	0.286026	1	0.592779	0
Hepatocellular-carcinoma:GCST90200505	0.848339	1.0486	0.644767	1.70535	0.348172	1	0.55515	0
Hepatocellular-carcinoma:GCST90200810	0.848625	0.924498	0.412869	2.07014	3.92963	1	0.0474423	0.745523
Hepatocellular-carcinoma:GCST90199991	0.849211	1.03654	0.715991	1.5006	0.149844	1	0.698684	0
Hepatocellular-carcinoma:GCST90200532	0.849511	0.965418	0.671172	1.38866	0.0562486	1	0.812527	0
Hepatocellular-carcinoma:GCST90200607	0.850064	0.955701	0.597447	1.52878	0.00102173	1	0.9745	0
Hepatocellular-carcinoma:GCST90200097	0.851357	1.04979	0.631538	1.74503	1.90996	1	0.166967	0.47643
Hepatocellular-carcinoma:GCST90200703	0.851447	0.971164	0.714988	1.31913	1.52494	1	0.216873	0.344236
Hepatocellular-carcinoma:GCST90199839	0.851707	1.01927	0.834452	1.24501	0.455394	1	0.499784	0
Hepatocellular-carcinoma:GCST90199958	0.852864	1.03261	0.735637	1.44947	0.0926681	1	0.760812	0
Hepatocellular-carcinoma:GCST90199994	0.853959	0.887631	0.249466	3.1583	6.10852	1	0.0134532	0.836294
Hepatocellular-carcinoma:GCST90200104	0.853965	0.945923	0.523312	1.70982	0.713376	1	0.398325	0
Hepatocellular-carcinoma:GCST90200095	0.855327	0.964448	0.653551	1.42324	0.33144	1	0.564812	0
Hepatocellular-carcinoma:GCST90200780	0.856046	1.06069	0.561229	2.00463	0.888552	1	0.34587	0
Hepatocellular-carcinoma:GCST90199942	0.856307	0.945595	0.516109	1.73248	1.4763	1	0.224355	0.32263
Hepatocellular-carcinoma:GCST90199730	0.856525	1.04455	0.651214	1.67546	0.100433	1	0.75131	0
Hepatocellular-carcinoma:GCST90199627	0.856605	1.02867	0.757081	1.39767	0.341956	1	0.558702	0
Hepatocellular-carcinoma:GCST90200639	0.856673	0.952526	0.561891	1.61474	0.220656	1	0.638541	0
Hepatocellular-carcinoma:GCST90200407	0.857374	1.04274	0.660592	1.64597	0.38085	1	0.537149	0
Hepatocellular-carcinoma:GCST90200767	0.857865	0.958352	0.601643	1.52655	0.0520455	1	0.819541	0
Hepatocellular-carcinoma:GCST90200684	0.858676	0.979821	0.782884	1.2263	0.143498	1	0.704828	0
Hepatocellular-carcinoma:GCST90200153	0.859792	0.969043	0.683605	1.37366	1.85402	1	0.173316	0.460632
Hepatocellular-carcinoma:GCST90199882	0.86134	1.04141	0.660511	1.64197	0.164348	1	0.685184	0
Hepatocellular-carcinoma:GCST90200992	0.862406	0.974823	0.730615	1.30066	0.538621	1	0.463005	0
Hepatocellular-carcinoma:GCST90200382	0.862695	1.05517	0.574125	1.93927	0.358929	1	0.549102	0
Hepatocellular-carcinoma:GCST90200683	0.862976	1.02038	0.811456	1.28309	0.0197668	1	0.88819	0
Hepatocellular-carcinoma:GCST90199917	0.863062	0.974035	0.722341	1.31343	0.0809889	1	0.775962	0
Hepatocellular-carcinoma:GCST90200299	0.863408	0.968799	0.675151	1.39017	0.00784349	1	0.929429	0
Hepatocellular-carcinoma:GCST90200943	0.864831	0.956659	0.574377	1.59337	1.19658	1	0.274007	0.164282
Hepatocellular-carcinoma:GCST90200952	0.865804	1.0894	0.403548	2.94088	4.85698	1	0.0275344	0.794111
Hepatocellular-carcinoma:GCST90200504	0.866866	0.973599	0.712078	1.33117	0.458606	1	0.498276	0
Hepatocellular-carcinoma:GCST90200791	0.867249	0.96942	0.673533	1.39529	1.02269	1	0.311882	0.0221841
Hepatocellular-carcinoma:GCST90199807	0.867257	0.981166	0.785076	1.22623	0.0085002	1	0.926542	0
Hepatocellular-carcinoma:GCST90200687	0.869747	0.982619	0.79684	1.21171	0.784322	1	0.375822	0
Hepatocellular-carcinoma:GCST90200121	0.869975	1.0565	0.54709	2.04024	2.73489	1	0.0981784	0.634354
Hepatocellular-carcinoma:GCST90200573	0.870288	1.02669	0.748405	1.40845	0.420218	1	0.516828	0
Hepatocellular-carcinoma:GCST90200418	0.871074	0.975436	0.722362	1.31717	0.0800294	1	0.777258	0
Hepatocellular-carcinoma:GCST90199768	0.871081	1.04392	0.62115	1.75445	0.648109	1	0.420789	0
Hepatocellular-carcinoma:GCST90200934	0.871521	0.910202	0.291022	2.84675	4.26563	1	0.0388908	0.765568
Hepatocellular-carcinoma:GCST90200702	0.872624	0.966199	0.634613	1.47104	2.20739	1	0.137351	0.546975
Hepatocellular-carcinoma:GCST90199961	0.874328	0.97243	0.687698	1.37505	1.89873	1	0.16822	0.473333
Hepatocellular-carcinoma:GCST90200007	0.874784	1.03372	0.684344	1.56146	0.00315795	1	0.955186	0
Hepatocellular-carcinoma:GCST90200448	0.874992	0.964982	0.61895	1.50447	0.03225	1	0.85748	0
Hepatocellular-carcinoma:GCST90200165	0.87551	1.02043	0.79231	1.31423	0.164754	1	0.684817	0
Hepatocellular-carcinoma:GCST90200501	0.877915	1.02568	0.74214	1.41756	0.662916	1	0.415532	0
Hepatocellular-carcinoma:GCST90199640	0.877941	0.960205	0.571869	1.61225	3.1124	1	0.0776984	0.678704
Hepatocellular-carcinoma:GCST90200720	0.878588	0.955635	0.533861	1.71063	0.883295	1	0.347301	0
Hepatocellular-carcinoma:GCST90200848	0.879018	0.954148	0.521365	1.74618	0.933794	1	0.333879	0
Hepatocellular-carcinoma:GCST90200926	0.87921	0.975447	0.707885	1.34414	0.221295	1	0.638055	0
Hepatocellular-carcinoma:GCST90199625	0.879535	0.922383	0.324447	2.62228	5.06803	1	0.0243711	0.802685
Hepatocellular-carcinoma:GCST90199831	0.880043	0.963649	0.595754	1.55873	2.55109	1	0.110218	0.60801
Hepatocellular-carcinoma:GCST90200520	0.880517	0.961139	0.573239	1.61152	2.23201	1	0.135178	0.551974
Hepatocellular-carcinoma:GCST90199634	0.880602	1.03811	0.637233	1.69117	2.6448	1	0.103889	0.6219
Hepatocellular-carcinoma:GCST90200280	0.881176	0.972492	0.674599	1.40193	1.83032	1	0.17609	0.453646
Hepatocellular-carcinoma:GCST90200396	0.881931	0.967722	0.627638	1.49208	0.421771	1	0.516055	0
Hepatocellular-carcinoma:GCST90200829	0.882196	0.961252	0.569949	1.62121	1.75856	1	0.184804	0.431353
Hepatocellular-carcinoma:GCST90200251	0.882699	1.01819	0.801386	1.29364	0.278723	1	0.59754	0
Hepatocellular-carcinoma:GCST90200160	0.8827	1.02362	0.750663	1.39584	0.630584	1	0.427141	0
Hepatocellular-carcinoma:GCST90199698	0.882881	0.981665	0.767438	1.25569	0.0507967	1	0.821683	0
Hepatocellular-carcinoma:GCST90200839	0.88298	0.982339	0.774854	1.24538	1.06809	1	0.301378	0.0637474
Hepatocellular-carcinoma:GCST90200601	0.883269	1.02419	0.744423	1.4091	0.238459	1	0.625321	0
Hepatocellular-carcinoma:GCST90200912	0.883299	0.972196	0.667179	1.41666	0.122455	1	0.726387	0
Hepatocellular-carcinoma:GCST90200100	0.884566	0.96927	0.635989	1.4772	0.389583	1	0.532519	0
Hepatocellular-carcinoma:GCST90200584	0.885215	1.0526	0.524828	2.11109	3.37741	1	0.066096	0.703915
Hepatocellular-carcinoma:GCST90199792	0.886851	1.04382	0.578214	1.88434	2.3305	1	0.126861	0.570908
Hepatocellular-carcinoma:GCST90199978	0.887078	1.04152	0.594045	1.82606	1.65465	1	0.198327	0.395644
Hepatocellular-carcinoma:GCST90200385	0.888956	0.96175	0.556287	1.66274	0.123042	1	0.725759	0
Hepatocellular-carcinoma:GCST90201005	0.889168	1.03484	0.639274	1.67518	0.0318969	1	0.858254	0
Hepatocellular-carcinoma:GCST90199688	0.889654	1.01768	0.79452	1.30351	0.00906544	1	0.924146	0
Hepatocellular-carcinoma:GCST90200308	0.889743	0.942523	0.408154	2.1765	1.61247	1	0.204145	0.379832
Hepatocellular-carcinoma:GCST90200721	0.89009	1.02256	0.745185	1.40318	0.538896	1	0.462891	0
Hepatocellular-carcinoma:GCST90199878	0.890216	0.978195	0.715269	1.33777	0.566046	1	0.451834	0
Hepatocellular-carcinoma:GCST90200238	0.891115	1.02084	0.759765	1.37164	1.66613	1	0.196778	0.399806
Hepatocellular-carcinoma:GCST90200515	0.891647	0.973617	0.662694	1.43042	1.02751	1	0.310744	0.0267741
Hepatocellular-carcinoma:GCST90200869	0.892212	0.951307	0.46211	1.95837	1.92796	1	0.164982	0.481316
Hepatocellular-carcinoma:GCST90200950	0.892532	0.956706	0.50341	1.81817	2.21559	1	0.136623	0.548653
Hepatocellular-carcinoma:GCST90200614	0.893849	1.05904	0.45605	2.45929	4.61567	1	0.0316812	0.783347
Hepatocellular-carcinoma:GCST90199714	0.894023	0.968901	0.608716	1.54221	1.74413	1	0.186617	0.426648
Hepatocellular-carcinoma:GCST90199830	0.894416	0.962119	0.543941	1.70179	1.27279	1	0.259245	0.214322
Hepatocellular-carcinoma:GCST90200473	0.894752	0.958921	0.515098	1.78515	1.37731	1	0.24056	0.273947
Hepatocellular-carcinoma:GCST90200061	0.896319	0.974149	0.656967	1.44446	0.000177841	1	0.98936	0
Hepatocellular-carcinoma:GCST90200353	0.896539	0.979008	0.711064	1.34792	0.134402	1	0.713911	0
Hepatocellular-carcinoma:GCST90199806	0.896673	0.98368	0.767366	1.26097	0.0224379	1	0.880928	0
Hepatocellular-carcinoma:GCST90200654	0.896684	1.03311	0.631862	1.68916	1.37191	1	0.241484	0.27109
Hepatocellular-carcinoma:GCST90200693	0.896821	0.982163	0.748246	1.28921	0.951602	1	0.329312	0
Hepatocellular-carcinoma:GCST90199729	0.898262	0.973229	0.642033	1.47527	0.131206	1	0.717185	0
Hepatocellular-carcinoma:GCST90200133	0.898917	0.972912	0.636884	1.48623	0.0518753	1	0.819832	0
Hepatocellular-carcinoma:GCST90200875	0.899596	0.975595	0.664639	1.43204	0.000879569	1	0.97634	0
Hepatocellular-carcinoma:GCST90200540	0.901397	1.02653	0.678383	1.55335	0.0208612	1	0.885158	0
Hepatocellular-carcinoma:GCST90200186	0.901423	1.02954	0.649548	1.63182	1.39306	1	0.237889	0.282157
Hepatocellular-carcinoma:GCST90199829	0.901627	0.967209	0.570062	1.64104	0.0106803	1	0.917689	0
Hepatocellular-carcinoma:GCST90200257	0.901789	1.00933	0.870904	1.16976	0.196661	1	0.657429	0
Hepatocellular-carcinoma:GCST90200339	0.902454	1.03582	0.589986	1.81857	0.20556	1	0.65027	0
Hepatocellular-carcinoma:GCST90200081	0.902692	1.02574	0.682463	1.54169	0.949284	1	0.329902	0
Hepatocellular-carcinoma:GCST90200110	0.903218	0.966708	0.560118	1.66844	0.000136854	1	0.990666	0
Hepatocellular-carcinoma:GCST90200310	0.903702	1.01993	0.740874	1.40409	1.75916	1	0.184729	0.431548
Hepatocellular-carcinoma:GCST90200275	0.903894	0.985213	0.773586	1.25473	0.777379	1	0.377944	0
Hepatocellular-carcinoma:GCST90200936	0.90527	1.03082	0.625254	1.69946	0.0683891	1	0.793697	0
Hepatocellular-carcinoma:GCST90200664	0.907388	1.01808	0.752757	1.37693	0.030743	1	0.860815	0
Hepatocellular-carcinoma:GCST90200677	0.908258	0.983967	0.747461	1.29531	0.0453349	1	0.831389	0
Hepatocellular-carcinoma:GCST90200190	0.908388	1.00801	0.879964	1.15468	0.114489	1	0.73509	0
Hepatocellular-carcinoma:GCST90200033	0.908952	1.02787	0.641688	1.64647	0.0255838	1	0.872921	0
Hepatocellular-carcinoma:GCST90200836	0.909795	0.970362	0.576634	1.63293	0.998664	1	0.317634	0
Hepatocellular-carcinoma:GCST90199654	0.910016	0.982183	0.719101	1.34151	0.433644	1	0.510206	0
Hepatocellular-carcinoma:GCST90200974	0.910605	1.02323	0.685301	1.52779	0.525799	1	0.468379	0
Hepatocellular-carcinoma:GCST90199935	0.910765	1.02518	0.663593	1.5838	0.141522	1	0.706772	0
Hepatocellular-carcinoma:GCST90200588	0.910983	0.974046	0.614273	1.54453	0.459779	1	0.497727	0
Hepatocellular-carcinoma:GCST90200901	0.911081	1.03291	0.58513	1.82336	0.184351	1	0.66766	0
Hepatocellular-carcinoma:GCST90200364	0.911176	1.03247	0.588909	1.81012	1.89978	1	0.168103	0.473622
Hepatocellular-carcinoma:GCST90200016	0.911652	0.977317	0.651652	1.46573	1.19668	1	0.273987	0.164351
Hepatocellular-carcinoma:GCST90200806	0.912142	0.991118	0.845868	1.16131	0.283157	1	0.594639	0
Hepatocellular-carcinoma:GCST90200149	0.912175	0.984886	0.751374	1.29097	0.00736808	1	0.931596	0
Hepatocellular-carcinoma:GCST90200483	0.912208	0.973171	0.600109	1.57815	0.484991	1	0.48617	0
Hepatocellular-carcinoma:GCST90200129	0.91236	0.960245	0.466281	1.9775	2.88632	1	0.0893349	0.653538
Hepatocellular-carcinoma:GCST90200925	0.912747	1.06107	0.36749	3.06368	5.12385	1	0.0235992	0.804834
Hepatocellular-carcinoma:GCST90200772	0.914903	1.01921	0.718903	1.44497	0.378902	1	0.538191	0
Hepatocellular-carcinoma:GCST90199774	0.915083	1.02751	0.623914	1.69219	1.25469	1	0.262658	0.202992
Hepatocellular-carcinoma:GCST90199836	0.915247	1.04177	0.49028	2.21362	1.62622	1	0.202227	0.385076
Hepatocellular-carcinoma:GCST90199850	0.916276	1.01212	0.808471	1.26708	1.14618	1	0.284351	0.127535
Hepatocellular-carcinoma:GCST90199691	0.916442	1.01782	0.731812	1.41559	0.0890611	1	0.765374	0
Hepatocellular-carcinoma:GCST90199828	0.916748	1.054	0.393162	2.8256	2.31685	1	0.127979	0.56838
Hepatocellular-carcinoma:GCST90199856	0.918138	0.982242	0.69795	1.38233	2.15528	1	0.142081	0.536023
Hepatocellular-carcinoma:GCST90200690	0.918323	0.99058	0.826661	1.187	0.340209	1	0.559709	0
Hepatocellular-carcinoma:GCST90200220	0.91856	0.974862	0.598405	1.58815	0.548838	1	0.458793	0
Hepatocellular-carcinoma:GCST90199692	0.919197	0.971111	0.551193	1.71094	1.51249	1	0.218759	0.338839
Hepatocellular-carcinoma:GCST90200803	0.919425	1.03175	0.563087	1.89048	1.63316	1	0.201266	0.387691
Hepatocellular-carcinoma:GCST90200011	0.919429	0.97381	0.582304	1.62854	0.0183431	1	0.892266	0
Hepatocellular-carcinoma:GCST90200059	0.920273	0.986194	0.751165	1.29476	0.274442	1	0.600367	0
Hepatocellular-carcinoma:GCST90200096	0.920447	1.02034	0.687306	1.51474	0.0885253	1	0.76606	0
Hepatocellular-carcinoma:GCST90199705	0.920867	1.01276	0.788668	1.30052	0.63499	1	0.425531	0
Hepatocellular-carcinoma:GCST90200529	0.921499	0.95533	0.384975	2.37069	2.72213	1	0.0989657	0.632641
Hepatocellular-carcinoma:GCST90199944	0.923514	0.981201	0.666038	1.4455	0.0384352	1	0.844572	0
Hepatocellular-carcinoma:GCST90200643	0.924306	1.02409	0.626733	1.67337	0.0419029	1	0.837805	0
Hepatocellular-carcinoma:GCST90200572	0.924314	0.981877	0.673263	1.43195	0.00835923	1	0.927152	0
Hepatocellular-carcinoma:GCST90200670	0.92446	0.985171	0.723419	1.34163	0.352078	1	0.552939	0
Hepatocellular-carcinoma:GCST90200356	0.924546	1.02829	0.577245	1.83178	0.748008	1	0.387108	0
Hepatocellular-carcinoma:GCST90200101	0.925608	0.984806	0.714134	1.35807	0.675977	1	0.410975	0
Hepatocellular-carcinoma:GCST90200676	0.926309	1.01112	0.79986	1.27818	0.734914	1	0.391295	0
Hepatocellular-carcinoma:GCST90200616	0.926428	0.988571	0.774547	1.26173	0.292464	1	0.588646	0
Hepatocellular-carcinoma:GCST90199936	0.926957	0.983421	0.687871	1.40596	0.00799385	1	0.928757	0
Hepatocellular-carcinoma:GCST90199622	0.927004	0.985978	0.7289	1.33373	0.23622	1	0.62695	0
Hepatocellular-carcinoma:GCST90199733	0.927304	1.01855	0.686229	1.51182	0.385014	1	0.534932	0
Hepatocellular-carcinoma:GCST90200173	0.927701	1.03084	0.534864	1.98674	0.037296	1	0.846864	0
Hepatocellular-carcinoma:GCST90199984	0.928431	0.981866	0.658601	1.4638	0.74819	1	0.38705	0
Hepatocellular-carcinoma:GCST90200699	0.928844	0.98786	0.755564	1.29158	0.301734	1	0.582798	0
Hepatocellular-carcinoma:GCST90200858	0.929107	0.981476	0.65012	1.48172	1.22264	1	0.268843	0.182099
Hepatocellular-carcinoma:GCST90200183	0.930452	0.990172	0.793195	1.23606	0.0769613	1	0.781458	0
Hepatocellular-carcinoma:GCST90200763	0.930464	1.01909	0.666447	1.55833	0.377211	1	0.5391	0
Hepatocellular-carcinoma:GCST90200691	0.931143	1.01033	0.800246	1.27557	0.590416	1	0.442258	0
Hepatocellular-carcinoma:GCST90200261	0.93155	0.980897	0.631669	1.5232	0.0879514	1	0.766798	0
Hepatocellular-carcinoma:GCST90199815	0.93157	0.987005	0.732246	1.3304	0.854682	1	0.355231	0
Hepatocellular-carcinoma:GCST90199701	0.931603	0.980255	0.621671	1.54567	0.021702	1	0.882883	0
Hepatocellular-carcinoma:GCST90199971	0.932159	0.987648	0.741874	1.31485	1.4046	1	0.235956	0.288051
Hepatocellular-carcinoma:GCST90199818	0.932424	0.984643	0.688539	1.40809	0.0184879	1	0.891845	0
Hepatocellular-carcinoma:GCST90200622	0.933312	0.973844	0.523455	1.81175	0.264149	1	0.607284	0
Hepatocellular-carcinoma:GCST90200118	0.933531	0.981653	0.635293	1.51685	1.99211	1	0.15812	0.49802
Hepatocellular-carcinoma:GCST90200618	0.933873	0.97855	0.586328	1.63315	0.368372	1	0.543893	0
Hepatocellular-carcinoma:GCST90200301	0.934226	0.982053	0.63878	1.5098	1.78249	1	0.181844	0.438987
Hepatocellular-carcinoma:GCST90200666	0.936082	0.979934	0.597103	1.60822	0.373668	1	0.541011	0
Hepatocellular-carcinoma:GCST90200402	0.936086	1.01332	0.733322	1.40023	0.540411	1	0.462262	0
Hepatocellular-carcinoma:GCST90200528	0.936864	0.979216	0.582348	1.64655	0.972721	1	0.324003	0
Hepatocellular-carcinoma:GCST90200426	0.937581	0.981986	0.623041	1.54773	1.27954	1	0.257985	0.218469
Hepatocellular-carcinoma:GCST90200277	0.93786	1.01473	0.702561	1.46561	1.96301	1	0.161192	0.490578
Hepatocellular-carcinoma:GCST90199731	0.937976	1.02372	0.567199	1.84768	0.330853	1	0.565157	0
Hepatocellular-carcinoma:GCST90200055	0.939105	1.02499	0.544144	1.93074	1.36664	1	0.242391	0.268276
Hepatocellular-carcinoma:GCST90200766	0.939281	0.976842	0.534563	1.78505	0.0192227	1	0.88973	0
Hepatocellular-carcinoma:GCST90200283	0.939916	1.01617	0.669599	1.54212	0.475677	1	0.490387	0
Hepatocellular-carcinoma:GCST90199704	0.94071	1.01456	0.693188	1.48492	5.29e-05	1	0.994197	0
Hepatocellular-carcinoma:GCST90200619	0.94088	1.01655	0.658825	1.5685	0.582317	1	0.445406	0
Hepatocellular-carcinoma:GCST90199993	0.941044	0.986329	0.684842	1.42054	0.955357	1	0.328359	0
Hepatocellular-carcinoma:GCST90199664	0.941797	1.01185	0.737472	1.38832	0.0437927	1	0.83424	0
Hepatocellular-carcinoma:GCST90200759	0.943142	0.982725	0.608768	1.5864	2.13481	1	0.143989	0.531573
Hepatocellular-carcinoma:GCST90200475	0.943151	1.01753	0.631057	1.6407	0.552431	1	0.457326	0
Hepatocellular-carcinoma:GCST90200232	0.943453	0.978426	0.535544	1.78756	1.89284	1	0.168882	0.471692
Hepatocellular-carcinoma:GCST90200761	0.94538	0.988616	0.71248	1.37177	0.598687	1	0.439079	0
Hepatocellular-carcinoma:GCST90200428	0.94575	0.983441	0.607952	1.59084	6.2e-05	1	0.993716	0
Hepatocellular-carcinoma:GCST90200447	0.945874	1.01472	0.665551	1.54706	0.759661	1	0.383435	0
Hepatocellular-carcinoma:GCST90200718	0.946074	1.01604	0.64069	1.61129	0.170428	1	0.679732	0
Hepatocellular-carcinoma:GCST90200574	0.947183	1.01427	0.666942	1.54248	0.0191744	1	0.889868	0
Hepatocellular-carcinoma:GCST90200521	0.947322	0.980294	0.543177	1.76918	0.196515	1	0.657549	0
Hepatocellular-carcinoma:GCST90200663	0.947464	1.01587	0.635972	1.6227	0.0280569	1	0.866975	0
Hepatocellular-carcinoma:GCST90200732	0.947584	1.01022	0.746137	1.36776	1.11368	1	0.291283	0.102078
Hepatocellular-carcinoma:GCST90200841	0.948303	0.991547	0.767139	1.2816	0.81352	1	0.367082	0
Hepatocellular-carcinoma:GCST90200042	0.948484	1.00487	0.867171	1.16443	2.84e-05	1	0.995745	0
Hepatocellular-carcinoma:GCST90200423	0.948863	1.0127	0.688728	1.48905	0.0282605	1	0.866498	0
Hepatocellular-carcinoma:GCST90200967	0.949078	0.989161	0.707974	1.38203	0.0995393	1	0.752383	0
Hepatocellular-carcinoma:GCST90200682	0.949327	0.99397	0.824827	1.1978	0.548384	1	0.458979	0
Hepatocellular-carcinoma:GCST90199680	0.950004	0.987558	0.667732	1.46057	0.0673034	1	0.795304	0
Hepatocellular-carcinoma:GCST90200328	0.952145	0.986909	0.641751	1.5177	1.41563	1	0.234125	0.293599
Hepatocellular-carcinoma:GCST90200266	0.953538	1.00819	0.766342	1.32635	0.216801	1	0.641489	0
Hepatocellular-carcinoma:GCST90200681	0.95441	1.00618	0.814558	1.24288	0.281756	1	0.595552	0
Hepatocellular-carcinoma:GCST90200028	0.955207	0.990207	0.702421	1.3959	0.755113	1	0.384862	0
Hepatocellular-carcinoma:GCST90199845	0.95545	0.985219	0.584304	1.66122	0.00426797	1	0.947912	0
Hepatocellular-carcinoma:GCST90199798	0.955582	0.992132	0.751365	1.31005	0.514582	1	0.473162	0
Hepatocellular-carcinoma:GCST90199755	0.956199	0.988521	0.654709	1.49253	1.39708	1	0.237214	0.284219
Hepatocellular-carcinoma:GCST90199940	0.95682	1.01132	0.672759	1.52027	0.0626438	1	0.802365	0
Hepatocellular-carcinoma:GCST90200513	0.957124	0.986102	0.592013	1.64252	0.521736	1	0.470102	0
Hepatocellular-carcinoma:GCST90200321	0.957751	0.965486	0.263259	3.54085	4.83545	1	0.0278803	0.793194
Hepatocellular-carcinoma:GCST90200510	0.957932	1.01327	0.620891	1.65361	0.541385	1	0.461859	0
Hepatocellular-carcinoma:GCST90200481	0.958992	0.984574	0.544372	1.78074	0.838356	1	0.359867	0
Hepatocellular-carcinoma:GCST90200368	0.959755	1.01696	0.529249	1.95409	1.19928	1	0.273465	0.166169
Hepatocellular-carcinoma:GCST90199897	0.96099	0.986527	0.572855	1.69892	2.02581	1	0.154647	0.506369
Hepatocellular-carcinoma:GCST90200587	0.961629	0.992461	0.729152	1.35086	0.00135464	1	0.97064	0
Hepatocellular-carcinoma:GCST90200757	0.962082	1.00578	0.793118	1.27546	0.0316808	1	0.85873	0
Hepatocellular-carcinoma:GCST90200408	0.962105	0.986786	0.57006	1.70815	0.64929	1	0.420367	0
Hepatocellular-carcinoma:GCST90200274	0.962294	1.00575	0.792876	1.27578	0.359016	1	0.549053	0
Hepatocellular-carcinoma:GCST90200468	0.962411	0.980648	0.435074	2.21036	1.91751	1	0.166132	0.47849
Hepatocellular-carcinoma:GCST90200163	0.96324	1.01495	0.540002	1.90763	0.700344	1	0.402668	0
Hepatocellular-carcinoma:GCST90200230	0.964414	0.985869	0.527593	1.84221	1.88829	1	0.169395	0.47042
Hepatocellular-carcinoma:GCST90199804	0.964849	0.989611	0.621949	1.57462	0.126447	1	0.722145	0
Hepatocellular-carcinoma:GCST90200668	0.965656	0.980147	0.393425	2.44186	1.63638	1	0.200822	0.388896
Hepatocellular-carcinoma:GCST90199753	0.965794	0.984195	0.475186	2.03844	2.32234	1	0.127528	0.5694
Hepatocellular-carcinoma:GCST90200057	0.966155	1.00741	0.716435	1.41655	0.0300166	1	0.862453	0
Hepatocellular-carcinoma:GCST90200026	0.96626	0.996621	0.851956	1.16585	0.0736099	1	0.786152	0
Hepatocellular-carcinoma:GCST90200786	0.966423	0.990842	0.645599	1.52071	0.112029	1	0.737846	0
Hepatocellular-carcinoma:GCST90200853	0.966467	1.00941	0.652384	1.56181	0.000970652	1	0.975146	0
Hepatocellular-carcinoma:GCST90199933	0.967086	1.01441	0.514095	2.00164	2.85005	1	0.0913712	0.649129
Hepatocellular-carcinoma:GCST90200389	0.967328	1.01359	0.531267	1.93381	0.100874	1	0.750784	0
Hepatocellular-carcinoma:GCST90200897	0.967833	1.02118	0.368671	2.82858	2.28423	1	0.130695	0.562216
Hepatocellular-carcinoma:GCST90200185	0.968556	0.993355	0.713081	1.38379	0.136312	1	0.711975	0
Hepatocellular-carcinoma:GCST90200441	0.969222	0.989751	0.586484	1.67031	1.2402	1	0.265432	0.19368
Hepatocellular-carcinoma:GCST90200270	0.970264	0.991036	0.617286	1.59108	0.136628	1	0.711656	0
Hepatocellular-carcinoma:GCST90199800	0.971057	0.992389	0.656824	1.49939	0.128007	1	0.720508	0
Hepatocellular-carcinoma:GCST90200245	0.971562	1.00511	0.759643	1.32988	0.0353536	1	0.850857	0
Hepatocellular-carcinoma:GCST90200019	0.971772	1.00606	0.719792	1.40619	0.810532	1	0.367963	0
Hepatocellular-carcinoma:GCST90200898	0.972192	1.00612	0.71412	1.41751	0.43677	1	0.508686	0
Hepatocellular-carcinoma:GCST90199890	0.973817	1.00581	0.711749	1.42136	0.20313	1	0.652206	0
Hepatocellular-carcinoma:GCST90200089	0.97466	0.996234	0.789305	1.25741	0.565515	1	0.452046	0
Hepatocellular-carcinoma:GCST90199650	0.974973	1.00663	0.666	1.52149	0.740609	1	0.389466	0
Hepatocellular-carcinoma:GCST90200881	0.975321	0.99449	0.700768	1.41132	0.00521217	1	0.942446	0
Hepatocellular-carcinoma:GCST90200545	0.975531	0.994494	0.698832	1.41524	0.258582	1	0.611096	0
Hepatocellular-carcinoma:GCST90200838	0.976603	1.00677	0.641475	1.58008	0.0602487	1	0.806103	0
Hepatocellular-carcinoma:GCST90201015	0.976769	0.996961	0.812271	1.22364	0.0499556	1	0.823141	0
Hepatocellular-carcinoma:GCST90200517	0.976771	1.00861	0.566404	1.79606	0.143393	1	0.704931	0
Hepatocellular-carcinoma:GCST90200463	0.976834	0.988497	0.452732	2.15829	2.66401	1	0.102642	0.624626
Hepatocellular-carcinoma:GCST90200638	0.977069	0.995418	0.727803	1.36144	0.611866	1	0.434086	0
Hepatocellular-carcinoma:GCST90199996	0.97724	0.994958	0.703037	1.40809	0.411993	1	0.52096	0
Hepatocellular-carcinoma:GCST90200539	0.977511	0.992343	0.581532	1.69336	2.00872	1	0.156397	0.502171
Hepatocellular-carcinoma:GCST90200980	0.977852	0.989016	0.453494	2.15692	1.93418	1	0.164302	0.482984
Hepatocellular-carcinoma:GCST90199777	0.977922	1.00569	0.673066	1.50268	0.725698	1	0.394281	0
Hepatocellular-carcinoma:GCST90200162	0.981884	1.00411	0.704554	1.43104	0.50103	1	0.479048	0
Hepatocellular-carcinoma:GCST90200492	0.983693	0.993986	0.557411	1.7725	1.37623	1	0.240745	0.273375
Hepatocellular-carcinoma:GCST90200511	0.984296	1.00581	0.564851	1.79101	0.0980324	1	0.754204	0
Hepatocellular-carcinoma:GCST90200372	0.985005	1.00385	0.672728	1.49794	0.0981939	1	0.754008	0
Hepatocellular-carcinoma:GCST90200565	0.985306	0.993746	0.509695	1.93749	2.0956	1	0.147724	0.52281
Hepatocellular-carcinoma:GCST90200128	0.986103	0.995308	0.586321	1.68958	0.0316233	1	0.858857	0
Hepatocellular-carcinoma:GCST90200948	0.986637	1.00367	0.65365	1.54112	0.0234032	1	0.878413	0
Hepatocellular-carcinoma:GCST90200725	0.987925	1.00224	0.749819	1.33964	0.0237996	1	0.877396	0
Hepatocellular-carcinoma:GCST90199808	0.988519	0.995099	0.509613	1.94309	2.39936	1	0.121385	0.583222
Hepatocellular-carcinoma:GCST90200250	0.98904	0.998089	0.759678	1.31132	0.0195404	1	0.888828	0
Hepatocellular-carcinoma:GCST90199630	0.98935	0.996941	0.635792	1.56323	0.0199238	1	0.88775	0
Hepatocellular-carcinoma:GCST90200419	0.99021	1.00281	0.640747	1.56946	1.46508	1	0.226124	0.317442
Hepatocellular-carcinoma:GCST90200784	0.990337	0.99764	0.680589	1.46239	0.0365244	1	0.848437	0
Hepatocellular-carcinoma:GCST90200877	0.99091	1.00325	0.574081	1.75326	0.630599	1	0.427136	0
Hepatocellular-carcinoma:GCST90200413	0.990911	1.0021	0.698388	1.43789	0.310598	1	0.577313	0
Hepatocellular-carcinoma:GCST90199811	0.991848	1.00199	0.684382	1.46699	0.0968601	1	0.755631	0
Hepatocellular-carcinoma:GCST90200738	0.993261	0.998717	0.741376	1.34538	0.325192	1	0.568504	0
Hepatocellular-carcinoma:GCST90200830	0.9936	1.00278	0.508853	1.97615	2.23041	1	0.135318	0.551652
Hepatocellular-carcinoma:GCST90200005	0.993645	1.00162	0.673085	1.4905	0.12305	1	0.72575	0
Hepatocellular-carcinoma:GCST90200707	0.99422	0.999304	0.827773	1.20638	0.121025	1	0.727925	0
Hepatocellular-carcinoma:GCST90200531	0.99501	1.00166	0.596447	1.68215	0.232268	1	0.629848	0
Hepatocellular-carcinoma:GCST90199810	0.995332	1.00141	0.625251	1.60386	1.24201	1	0.265085	0.194851
Hepatocellular-carcinoma:GCST90200107	0.996058	1.00063	0.777891	1.28716	0.0102389	1	0.919402	0
