# Supplementary material for: Exploring Hepatocellular Carcinoma Etiology through Multi-omics Bioinformatics
Source: Research Square preprint supplement (doi:10.21203/rs.3.rs-6188338/v1), 2025-04-21
Supplement: Supplementary file 2 [file 747e0c0d0d380df5cce118d6.xlsx]

## Sheet: Table.2.
The identified multi-omics phenotypes with causal effect on HCC(Secondary results via meta analysis).
id	Random_p-value	Random_OR	Random_95lci	Random_95uci	Q	df.Q	p-value.Q	I2
peripheral blood immune cells&immune factors phenotypes
CD20 on CD20- CD38- B cell	0.00168021	0.702758	0.563939	0.875749	0.00240369	1	0.960897	0
CD16-CD56 on Natural Killer	0.00581678	0.830304	0.727515	0.947616	0.122009	1	0.726866	0
peripheral blood metabolites
pro-hydroxy-pro	0.00227928	1.66053	1.19886	2.29999	0.589858	1	0.442474	0
stearoylcarnitine	0.00276838	1.57523	1.16973	2.12129	0.335835	1	0.562243	0
N-acetylserine	0.00441042	1.4147	1.11417	1.79631	1.13642	1	0.286409	0.120046
Hydroxypalmitoyl sphingomyelin	0.00644814	0.685102	0.521893	0.89935	0.264617	1	0.606966	0
Sulfate of piperine metabolite	0.00690607	1.58518	1.13478	2.21434	0.100257	1	0.751521	0
X-13728	0.00816714	0.548642	0.351647	0.855996	0.690104	1	0.406129	0
Oleoyl-linoleoyl-glycerol to linoleoyl-arachidonoyl-glycerol ratio	0.00835973	0.760197	0.620054	0.932013	0.0202839	1	0.886747	0
N-acetylhistidine	0.00841191	1.30247	1.07005	1.58537	0.213164	1	0.644299	0
alpha-ketobutyrate	0.00970371	1.39995	1.08488	1.80652	0.160618	1	0.688588	0
