# Supplementary material for: Exploring Hepatocellular Carcinoma Etiology through Multi-omics Bioinformatics
Source: Research Square preprint supplement (doi:10.21203/rs.3.rs-6188338/v1), 2025-04-21
Supplement: Supplementary file 3 [file ad255b52d1919b68e9f28b5b.xlsx]

## Sheet: Content
Content
S3.1. The resluts of forward univariable MR analysis between immune factors phenotypes and the risk of HCC in FinnGen database.
S3.2. The resluts of forward univariable MR analysis between immune factors phenotypes and the risk of HCC in UK Bio-Bank database.

## Sheet: S3.1
The resluts of forward univariable MR analysis between immune factors phenotypes and the risk of HCC in FinnGen database.
id	nsnp	MR-Egger			Weighted median			Inverse variance weighted			Simple mode			Weighted mode			MR-Egger intercept		MR-PRESSO global	MR-IVW			MR-Egeer			steiger_test_pval	power
		p_value	OR	95% OR	p_value	OR	95% OR	p_value	OR	95% OR	p_value	OR	95% OR	p_value	OR	95% OR	egger intercept	p_value	p_value	Q	Q_df	Q_pval	Q	Q_df	Q_pval
GCST90274805	12	0.973	1.0154	0.42802-2.4088	0.13	1.65996	0.86109-3.19999	0.026	1.7117	1.06608-2.74828	0.075	3.35804	1.00403-11.23121	0.185	1.69508	0.81589-3.52168	0.07872	0.19376	0.342	11.9692	11	0.36596	10.0236	10	0.43842	3.78467e-82	0.856966
GCST90274785	12	0.093	0.2059	0.03890-1.0899	0.02	0.41681	0.19940-0.87125	0.048	0.57133	0.32825-0.99444	0.24	0.47086	0.14351-1.54484	0.027	0.36787	0.17059-0.79333	0.09014	0.23317	0.351	11.5604	11	0.39757	9.95	10	0.44489	3.62776e-79	0.362334
GCST90274760	15	0.025	4.98775	1.43560-17.3291	0.337	1.43868	0.68518-3.02082	0.057	1.7142	0.98306-2.98912	0.563	1.50812	0.38688-5.87894	0.74	1.29868	0.28641-5.88869	-0.10665	0.08792	0.251	17.2516	14	0.24302	13.6714	13	0.39739	6.33951e-67	0.784279
GCST90274759	463	0.295	0.89687	0.73179-1.0992	0.568	0.92145	0.69597-1.21997	0.074	0.89462	0.79170-1.01093	0.89	0.95748	0.51777-1.77061	0.545	0.92846	0.73007-1.18076	-0.00025	0.9759	0.877	429.592	462	0.85771	429.591	461	0.85008	0	0.402448
GCST90274765	14	0.104	0.48477	0.21660-1.0849	0.107	0.61063	0.33530-1.11207	0.09	0.68416	0.44100-1.06139	0.19	0.56492	0.25167-1.26810	0.127	0.59581	0.31986-1.10982	0.05049	0.33713	0.73	10.4105	13	0.66007	9.41084	12	0.6675	8.88987e-102	0.266729
GCST90274836	22	0.864	0.93466	0.43578-2.0046	0.288	0.78472	0.50183-1.22709	0.096	0.76101	0.55154-1.05003	0.357	0.64923	0.26432-1.59464	0.311	0.76028	0.45314-1.27562	-0.02514	0.56686	0.58	19.4793	21	0.55442	19.1402	20	0.51273	5.71786e-170	0.306615
GCST90274829	12	0.752	0.80521	0.21764-2.9792	0.939	0.96842	0.42308-2.21672	0.113	0.61398	0.33594-1.12215	0.874	1.11674	0.29385-4.24405	0.821	1.15114	0.35077-3.77771	-0.02939	0.65693	0.649	8.82954	11	0.63762	8.62002	10	0.5685	7.13669e-54	0.221826
GCST90274795	18	0.423	0.72453	0.33613-1.5617	0.214	0.72567	0.43741-1.20391	0.126	0.74925	0.51748-1.08484	0.396	0.71242	0.33234-1.52716	0.295	0.70267	0.37047-1.33273	0.0042	0.92335	0.633	15.1459	17	0.58498	15.1363	16	0.51468	1.4059e-120	0.214053
GCST90274791	24	0.196	1.46526	0.83539-2.5700	0.506	1.17567	0.72989-1.89369	0.146	1.29571	0.91357-1.83769	0.758	0.86806	0.35642-2.11416	0.631	1.12857	0.69356-1.83642	-0.01711	0.58566	0.292	26.4997	23	0.27785	26.1361	22	0.24588	9.98288e-236	0.468605
GCST90274846	21	0.967	1.0175	0.44953-2.3031	0.727	1.10074	0.64175-1.88801	0.166	0.76706	0.52719-1.11609	0.083	0.3919	0.14351-1.07022	0.654	1.14218	0.64386-2.02618	-0.03384	0.45481	0.749	14.8868	20	0.78285	14.3046	19	0.76565	3.27874e-166	0.23871
GCST90274761	8	0.541	0.57279	0.10609-3.0927	0.154	0.50406	0.19663-1.29214	0.188	0.62561	0.31129-1.25733	0.331	0.4665	0.11150-1.95184	0.298	0.46179	0.11998-1.77739	0.009	0.914	0.574	5.67156	7	0.57858	5.65887	6	0.46247	1.21237e-38	0.190294
GCST90274818	20	0.556	1.24311	0.61060-2.5308	0.227	1.42166	0.80380-2.51445	0.198	1.30327	0.87041-1.95139	0.54	1.31006	0.56097-3.05942	0.323	1.37174	0.74505-2.52556	0.00686	0.876	0.666	16.561	19	0.61958	16.5359	18	0.5552	1.24206e-130	0.305105
GCST90274764	18	0.107	0.49786	0.22365-1.1082	0.221	0.70517	0.40321-1.23329	0.201	0.76825	0.51290-1.15074	0.658	0.80168	0.30660-2.09619	0.117	0.5637	0.28548-1.11304	0.05754	0.23613	0.94	7.94474	17	0.96771	6.42947	16	0.98276	6.63165e-156	0.220484
GCST90274843	24	0.092	1.45268	0.95824-2.2022	0.229	1.24449	0.87144-1.77724	0.209	1.18549	0.90932-1.54553	0.238	1.53597	0.76698-3.07594	0.754	1.06494	0.72133-1.57223	-0.04833	0.23047	0.11	30.013	23	0.14903	28.072	22	0.17331	0	0.298201
GCST90274781	21	0.118	0.42885	0.15556-1.1823	0.211	0.6992	0.39900-1.22524	0.216	0.78305	0.53144-1.15378	0.277	0.60838	0.25451-1.45428	0.202	0.68175	0.38576-1.20483	0.06713	0.22316	0.724	16.3372	20	0.69549	14.7513	19	0.73827	4.00835e-164	0.213041
GCST90274821	18	0.18	0.68025	0.39708-1.1654	0.333	0.81337	0.53556-1.23529	0.239	0.82587	0.60078-1.13528	0.535	1.24153	0.63587-2.42408	0.24	0.75738	0.48408-1.18497	0.03533	0.39252	0.387	18.5693	17	0.35381	17.7143	16	0.34089	6.30755e-167	0.156095
GCST90274793	14	0.197	2.27951	0.69947-7.4287	0.52	1.27039	0.61286-2.63339	0.29	1.35208	0.77363-2.36304	0.891	1.08373	0.34996-3.35597	0.617	1.2512	0.53029-2.95216	-0.06331	0.34488	0.719	10.2959	13	0.66957	9.32909	12	0.67459	3.07533e-88	0.291258
GCST90274786	15	0.651	0.80202	0.31529-2.0402	0.239	0.66708	0.34026-1.30781	0.294	0.78257	0.49492-1.23742	0.397	0.61956	0.21181-1.81229	0.241	0.62744	0.29770-1.32242	-0.00299	0.95373	0.69	11.3739	14	0.65645	11.3704	13	0.57982	6.40684e-104	0.153241
GCST90274823	16	0.152	0.46391	0.17163-1.2539	0.142	0.6574	0.37541-1.15119	0.308	0.77853	0.48132-1.25925	0.963	1.02692	0.34028-3.09915	0.161	0.60423	0.30944-1.17985	0.07354	0.26472	0.121	21.7027	15	0.11584	19.794	14	0.13677	3.80497e-114	0.195738
GCST90274847	17	0.651	0.79436	0.29869-2.1126	0.344	0.7785	0.46367-1.30709	0.322	0.81033	0.53462-1.22823	0.579	0.77351	0.31802-1.88137	0.633	0.85162	0.44621-1.62539	0.00216	0.96517	0.235	20.0206	16	0.21929	20.018	15	0.17124	1.62072e-154	0.16555
GCST90274763	8	0.977	1.01979	0.28856-3.6040	0.431	1.37579	0.62231-3.04156	0.352	1.43101	0.67230-3.04594	0.405	1.62234	0.55657-4.72893	0.541	1.31434	0.57086-3.02612	0.05872	0.52624	0.298	9.9296	7	0.1926	9.23342	6	0.16087	2.72434e-39	0.21756
GCST90274840	7	0.764	1.07067	0.70263-1.6315	0.508	0.9145	0.70202-1.19129	0.365	0.88432	0.67760-1.15410	0.067	0.46904	0.24158-0.91064	0.653	0.9361	0.71222-1.23035	-0.0618	0.30913	0.402	7.58867	6	0.26981	6.0414	5	0.30221	3.45904e-301	0.14705
GCST90274809	10	0.998	1.00171	0.18550-5.4094	0.408	1.48042	0.58480-3.74766	0.372	1.4822	0.62507-3.51465	0.765	1.24889	0.30396-5.13137	0.396	1.72948	0.51880-5.76541	0.0574	0.60497	0.167	14.1121	9	0.11839	13.6186	8	0.09226	3.18377e-44	0.323876
GCST90274834	11	0.08	2.96655	1.00489-8.7576	0.12	1.85369	0.85079-4.03883	0.407	1.26594	0.72457-2.21178	0.408	1.78572	0.47837-6.66593	0.175	2.06985	0.78008-5.49213	-0.12138	0.1055	0.453	9.67749	10	0.46923	6.43995	9	0.69521	5.47786e-69	0.152311
GCST90274798	478	0.253	0.88499	0.71803-1.0908	0.31	0.8805	0.68885-1.12546	0.418	0.95215	0.84559-1.07214	0.271	0.71947	0.40054-1.29233	0.151	0.81628	0.61885-1.07671	0.00705	0.40526	0.673	463.292	477	0.66513	462.598	476	0.6616	0	0.115365
GCST90274777	458	0.866	0.98262	0.80121-1.2051	0.076	1.24798	0.97686-1.59433	0.425	0.95198	0.84356-1.07434	0.192	0.65525	0.34761-1.23518	0.106	1.22661	0.95780-1.57087	-0.00307	0.70572	0.188	480.63	457	0.21462	480.479	456	0.20653	0	0.125776
GCST90274819	8	0.223	3.32153	0.58924-18.7232	0.727	0.86663	0.38837-1.93384	0.429	0.73234	0.33842-1.58477	0.197	0.31633	0.06491-1.54157	0.939	1.03797	0.41155-2.61782	-0.16697	0.11283	0.118	12.8931	7	0.07476	8.19028	6	0.22449	6.29151e-37	0.124758
GCST90274783	5	0.329	1.30219	0.83433-2.0324	0.413	1.13616	0.83680-1.54260	0.436	1.11902	0.84341-1.48471	0.855	0.9357	0.47893-1.82813	0.462	1.13346	0.83770-1.53365	-0.04921	0.45108	0.778	1.76524	4	0.77884	1.01854	3	0.79677	1.51411e-286	0.130328
GCST90274808	8	0.12	6.0735	0.86414-42.6869	0.723	1.18604	0.46197-3.04502	0.462	1.37383	0.58935-3.20251	0.904	1.1002	0.24611-4.91835	0.86	0.89465	0.27061-2.95779	-0.1705	0.1557	0.195	10.5619	7	0.1589	7.33947	6	0.29059	5.3107e-39	0.203079
GCST90274779	7	0.319	0.60665	0.25048-1.4693	0.554	0.87124	0.55194-1.37524	0.462	0.8147	0.47186-1.40665	0.661	0.76428	0.24393-2.39462	0.487	0.84206	0.53442-1.32679	0.06302	0.4373	0.404	9.85023	6	0.1311	8.62253	5	0.1251	1.63629e-126	0.146413
GCST90274788	15	0.052	2.89992	1.09322-7.6924	0.55	1.19361	0.66844-2.13141	0.473	1.17291	0.75909-1.81234	0.96	0.97725	0.40687-2.34723	0.414	1.29867	0.70631-2.38781	-0.10791	0.06666	0.354	15.9737	14	0.31498	11.9678	13	0.53029	6.83106e-131	0.131576
GCST90274773	16	0.294	2.15908	0.54187-8.6028	0.425	0.7574	0.38256-1.49954	0.486	0.82142	0.47220-1.42889	0.787	1.17897	0.36576-3.80019	0.644	0.816	0.35035-1.90056	-0.10172	0.15976	0.09	23.3437	15	0.07711	20.1677	14	0.12494	7.49424e-107	0.121884
GCST90274802	13	0.791	1.24759	0.25228-6.1696	0.452	0.75354	0.36056-1.57485	0.492	0.83453	0.49802-1.39844	0.453	0.64249	0.21001-1.96555	0.534	0.72737	0.27460-1.92669	-0.04118	0.61271	0.608	10.3492	12	0.58536	10.0777	11	0.52341	7.52574e-68	0.0974462
GCST90274778	18	0.337	2.02201	0.50198-8.1447	0.518	1.2396	0.64616-2.37808	0.496	1.18375	0.72820-1.92429	0.842	1.11354	0.39201-3.16310	0.901	1.06865	0.38085-2.99859	-0.04881	0.43339	0.823	11.7636	17	0.81424	11.1178	16	0.80216	1.06614e-102	0.122443
GCST90274820	14	0.661	1.19303	0.55256-2.5759	0.714	1.09681	0.66867-1.79911	0.507	1.14471	0.76809-1.70599	0.329	1.71951	0.60278-4.90510	0.859	1.05196	0.60871-1.81795	-0.00657	0.90257	0.232	16.7641	13	0.21032	16.7422	12	0.15955	5.78545e-137	0.122883
GCST90274758	10	0.674	1.36242	0.33906-5.4745	0.48	1.28711	0.63853-2.59447	0.531	1.18819	0.69235-2.03912	0.312	1.75572	0.62635-4.92147	0.398	1.49691	0.61403-3.64926	-0.0139	0.83949	0.691	6.80256	9	0.65767	6.75878	8	0.56287	1.25677e-72	0.102298
GCST90274775	19	0.454	1.33436	0.63794-2.7910	0.654	1.13553	0.65088-1.98104	0.533	1.12507	0.77667-1.62977	0.768	1.13466	0.49579-2.59675	0.672	1.13466	0.63889-2.01513	-0.02097	0.60706	0.615	16.4149	18	0.56362	16.1403	17	0.51391	7.6865e-141	0.0959206
GCST90274839	14	0.772	0.81676	0.21464-3.1079	0.438	1.35234	0.63098-2.89837	0.534	1.19627	0.68051-2.10292	0.336	1.83581	0.55749-6.04527	0.364	1.76351	0.54119-5.74655	0.03786	0.5485	0.777	9.63103	13	0.72379	9.24984	12	0.68146	9.0815e-67	0.117764
GCST90274832	12	0.108	3.21707	0.87799-11.7878	0.65	0.83339	0.37906-1.83225	0.541	0.84415	0.49048-1.45284	0.219	0.41042	0.10755-1.56618	0.518	0.71528	0.26740-1.91332	-0.12332	0.05068	0.434	11.1341	11	0.4321	6.20513	10	0.79775	1.93664e-76	0.0902185
GCST90274772	13	0.98	0.99406	0.63250-1.5623	1	0.99994	0.73608-1.35839	0.559	0.90817	0.65730-1.25480	0.06	0.36074	0.13790-0.94364	0.701	1.06444	0.77978-1.45302	-0.02081	0.5746	0.31	16.8819	12	0.1541	16.3835	11	0.12748	0	0.102118
GCST90274766	17	0.969	0.97297	0.25454-3.7192	0.531	1.25636	0.61524-2.56555	0.571	1.15591	0.69992-1.90898	0.483	1.55065	0.46866-5.13064	0.552	1.39322	0.47800-4.06075	0.01693	0.78966	0.591	14.027	16	0.59671	13.9532	15	0.52908	3.42723e-93	0.0961233
GCST90274770	16	0.316	0.83971	0.60417-1.1671	0.998	0.9996	0.77375-1.29138	0.574	1.06725	0.85068-1.33896	0.049	2.13443	1.06774-4.26676	0.987	1.002	0.79404-1.26442	0.08096	0.06897	0.969	6.79434	15	0.96311	2.91406	14	0.99922	0	0.0843844
GCST90274825	13	0.758	0.92221	0.55776-1.5248	0.65	0.91443	0.62118-1.34613	0.588	0.91523	0.66430-1.26095	0.707	1.17043	0.52513-2.60868	0.471	0.86837	0.59902-1.25884	-0.00145	0.97006	0.943	5.58621	12	0.93549	5.58474	11	0.89959	1.71712e-265	0.0879159
GCST90274774	470	0.996	0.99952	0.81303-1.2288	0.395	0.89087	0.68257-1.16273	0.588	0.96739	0.85792-1.09082	0.639	1.15359	0.63523-2.09495	0.47	0.91582	0.72146-1.16254	-0.00321	0.7031	0.298	487.456	469	0.26876	487.305	468	0.25971	0	0.0848256
GCST90274813	9	0.476	1.84459	0.37456-9.0839	0.653	1.19805	0.54549-2.63128	0.59	1.18719	0.63586-2.21655	0.701	0.7773	0.22434-2.69313	0.924	0.94026	0.27696-3.19214	-0.04386	0.5745	0.915	3.15852	8	0.92402	2.81185	7	0.90185	1.33607e-44	0.0891335
GCST90274799	10	0.612	0.72723	0.22250-2.3769	0.697	0.87355	0.44279-1.72336	0.608	1.14912	0.67577-1.95404	0.81	0.87493	0.30411-2.51718	0.76	0.85279	0.31690-2.29487	0.05321	0.42157	0.671	6.61802	9	0.67682	5.9005	8	0.65838	9.33968e-51	0.078389
GCST90274794	10	0.588	0.77746	0.32452-1.8626	0.994	0.99718	0.49674-2.00178	0.627	0.87832	0.52057-1.48195	0.917	1.06188	0.35389-3.18626	0.969	1.01847	0.41586-2.49432	0.01892	0.74142	0.571	7.97982	9	0.53618	7.8631	8	0.44696	4.92131e-51	0.0702378
GCST90274817	18	0.606	0.79046	0.32928-1.8976	0.865	0.94476	0.49113-1.81738	0.64	1.11917	0.69786-1.79483	0.958	0.97163	0.33721-2.79966	0.887	0.94103	0.41240-2.14730	0.04031	0.36909	0.764	13.0439	17	0.73324	12.1896	16	0.73083	7.53133e-96	0.0784748
GCST90274776	12	0.442	1.83709	0.41471-8.1380	0.679	1.15157	0.58993-2.24791	0.648	1.12143	0.68518-1.83543	0.721	1.22971	0.40755-3.71041	0.632	1.17968	0.61121-2.27687	-0.0607	0.5066	0.712	8.32465	11	0.68396	7.85017	10	0.64347	4.55532e-90	0.077262
GCST90274830	13	0.575	0.71348	0.22709-2.2417	0.887	1.04306	0.58283-1.86674	0.658	1.12254	0.67317-1.87188	0.908	1.06683	0.36640-3.10623	0.914	1.03406	0.57118-1.87206	0.0596	0.40317	0.24	16.2125	12	0.1817	15.17	11	0.17485	7.40087e-130	0.0894325
GCST90274780	20	0.675	0.85864	0.42636-1.7292	0.17	0.68551	0.39965-1.17584	0.659	0.91562	0.61888-1.35464	0.246	0.61462	0.27718-1.36283	0.228	0.66148	0.34544-1.26666	0.00733	0.83061	0.582	17.8005	19	0.5358	17.7533	18	0.47201	2.06804e-154	0.071655
GCST90274767	18	0.37	1.24999	0.77794-2.0085	0.655	1.08552	0.75774-1.55509	0.685	0.92728	0.64356-1.33609	0.689	0.81055	0.29471-2.22926	0.474	1.13992	0.80280-1.61861	-0.06837	0.09226	0.16	25.9243	17	0.07585	21.5958	16	0.15673	1.8937e-302	0.0805554
GCST90274797	17	0.112	0.69407	0.45409-1.0609	0.536	0.91253	0.68288-1.21942	0.691	1.06997	0.76614-1.49431	0.686	0.81898	0.31627-2.12078	0.567	0.9165	0.68442-1.22728	0.10471	0.01689	0.211	26.4458	16	0.04807	17.8522	15	0.27051	0	0.0836273
GCST90274811	12	0.744	1.20412	0.40750-3.5581	0.489	0.76042	0.35022-1.65110	0.699	0.89503	0.50999-1.57079	0.788	0.8366	0.23508-2.97721	0.531	0.68508	0.21804-2.15251	-0.04038	0.54416	0.747	7.50771	11	0.7566	7.11349	10	0.71469	4.50496e-58	0.0664445
GCST90274801	10	0.317	2.37771	0.48401-11.6806	0.585	0.78366	0.32667-1.87995	0.704	1.13168	0.59720-2.14451	0.645	0.69379	0.15439-3.11776	0.667	0.69379	0.13855-3.47405	-0.07619	0.3474	0.318	10.0808	9	0.34398	8.96424	8	0.34532	5.60175e-45	0.0694729
GCST90274837	10	0.944	0.92685	0.12039-7.1357	0.708	0.83766	0.33162-2.11594	0.705	0.86985	0.42252-1.79079	0.906	0.91404	0.21289-3.92451	0.904	0.92374	0.26373-3.23546	-0.00784	0.94964	0.888	4.34359	9	0.88738	4.33935	8	0.82528	3.65034e-48	0.0661803
GCST90274800	12	0.549	0.8722	0.56600-1.3441	0.657	0.93194	0.68303-1.27155	0.714	0.95177	0.73037-1.24028	0.654	0.87914	0.50789-1.52176	0.667	0.92849	0.66827-1.29004	0.02048	0.62756	0.956	5.01557	11	0.93041	4.76509	10	0.90631	5.45873e-259	0.0649608
GCST90274782	12	0.814	1.08884	0.54609-2.1710	0.364	1.18006	0.82511-1.68771	0.724	1.08395	0.69282-1.69589	0.867	1.06496	0.51779-2.19035	0.376	1.18948	0.82251-1.72017	-0.001	0.98641	0.092	22.001	11	0.02437	22.0004	10	0.0151	5.50991e-213	0.080436
GCST90274796	10	0.18	0.55928	0.25777-1.2134	0.833	0.92822	0.46516-1.85226	0.727	0.91189	0.54293-1.53158	0.805	1.15213	0.38773-3.42354	0.852	0.91813	0.38280-2.20207	0.08342	0.15299	0.268	10.4437	9	0.31577	7.95051	8	0.43832	1.57085e-46	0.0592166
GCST90274844	26	0.267	0.72065	0.40936-1.2687	0.432	0.84629	0.55815-1.28318	0.728	0.94914	0.70711-1.27402	0.914	0.96476	0.50588-1.83988	0.579	0.86717	0.52740-1.42583	0.03904	0.27474	0.491	24.6293	25	0.4833	23.3799	24	0.49747	1.01551e-247	0.0626734
GCST90274762	19	0.929	1.07212	0.23628-4.8648	0.933	0.96913	0.46454-2.02184	0.733	0.9131	0.54144-1.53989	0.192	0.34581	0.07452-1.60466	0.572	1.41015	0.43799-4.54010	-0.01433	0.82717	0.571	16.65	18	0.54728	16.6008	17	0.48171	2.32241e-95	0.0649463
GCST90274841	21	0.298	1.70492	0.64170-4.5297	0.785	0.92133	0.51117-1.66059	0.738	0.93403	0.62665-1.39220	0.465	0.67053	0.23409-1.92073	0.649	0.80545	0.32129-2.01918	-0.064	0.20174	0.829	13.7297	20	0.84393	11.981	19	0.88644	4.2478e-119	0.0628637
GCST90274816	11	0.685	0.56789	0.04036-7.9901	0.473	0.72143	0.29565-1.76040	0.759	1.13093	0.51532-2.48197	0.54	0.65301	0.17488-2.43836	0.519	0.64332	0.17659-2.34368	0.0548	0.6044	0.165	15.0037	10	0.13193	14.5381	9	0.10443	1.57833e-51	0.0685969
GCST90274848	18	0.381	0.80508	0.50217-1.2907	0.967	1.00592	0.76050-1.33053	0.765	1.05197	0.75459-1.46653	0.737	0.82058	0.26323-2.55802	0.912	0.98377	0.73869-1.31017	0.06579	0.14997	0.106	30.3721	17	0.02378	26.5738	16	0.04647	0	0.0691393
GCST90274769	19	0.164	2.25196	0.75481-6.7187	0.67	1.17085	0.56655-2.41974	0.767	1.08024	0.64848-1.79947	0.257	0.42371	0.10073-1.78224	0.35	1.9983	0.48598-8.21677	-0.07299	0.15568	0.45	18.3417	18	0.43337	16.1345	17	0.51432	5.05867e-97	0.0630271
GCST90274831	12	0.485	0.66778	0.22432-1.9879	0.91	0.96373	0.50832-1.82716	0.784	1.07209	0.65183-1.76331	0.556	0.75014	0.29655-1.89751	0.708	0.86449	0.41173-1.81511	0.05488	0.36125	0.4	12.227	11	0.34683	11.2016	10	0.34203	7.9955e-80	0.0584059
GCST90274803	14	0.052	0.37885	0.15649-0.9172	0.279	0.75697	0.45707-1.25363	0.787	0.94404	0.62127-1.43450	0.519	0.73212	0.29121-1.84060	0.253	0.73212	0.43947-1.21966	0.13933	0.04514	0.284	16.1298	13	0.24219	11.1313	12	0.5177	2.4425e-151	0.0593147
GCST90274771	20	0.133	0.52235	0.23255-1.1733	0.124	0.67888	0.41466-1.11148	0.806	0.95111	0.63814-1.41756	0.635	0.75979	0.24920-2.31654	0.071	0.60438	0.36083-1.01233	0.06758	0.11694	0.171	23.5385	19	0.21445	20.4565	18	0.30772	8.98308e-178	0.0584521
GCST90274804	11	0.557	0.89596	0.62974-1.2747	0.801	0.97057	0.76983-1.22366	0.815	0.97552	0.79262-1.20063	0.527	0.83845	0.49484-1.42064	0.763	0.96722	0.78343-1.19414	0.03437	0.57284	0.941	3.99558	10	0.94755	3.65321	9	0.93272	0	0.0556871
GCST90274812	8	0.572	0.62354	0.13254-2.9335	0.566	0.7842	0.34225-1.79685	0.816	0.92757	0.49257-1.74673	0.665	0.75395	0.22137-2.56779	0.559	0.69888	0.22271-2.19316	0.04395	0.60166	0.908	2.61323	7	0.91833	2.30985	6	0.88911	2.18573e-38	0.0549523
GCST90274822	441	0.601	0.9549	0.80352-1.1348	0.756	0.96892	0.79422-1.18206	0.816	1.01375	0.90356-1.13740	0.524	0.81863	0.44255-1.51430	0.551	0.94322	0.77830-1.14309	0.00697	0.36265	0.139	473.43	440	0.13095	472.536	439	0.12997	0	0.0565368
GCST90274824	16	0.783	1.13011	0.48056-2.6576	0.65	0.89134	0.54262-1.46415	0.82	1.04703	0.70491-1.55522	0.648	0.80312	0.31950-2.01881	0.749	0.8903	0.44310-1.78883	-0.01198	0.84492	0.049	23.8436	15	0.0678	23.7761	14	0.04876	1.44512e-225	0.059828
GCST90274845	11	0.611	0.72755	0.22261-2.3778	0.628	0.8156	0.35775-1.85943	0.822	0.93292	0.50871-1.71086	0.346	0.46062	0.09902-2.14278	0.365	0.48289	0.10736-2.17192	0.03721	0.64329	0.548	8.5376	10	0.57647	8.30806	9	0.50342	1.09111e-52	0.0559413
GCST90274827	12	0.352	1.34895	0.73986-2.4595	0.489	1.20051	0.71555-2.01414	0.829	0.95908	0.65670-1.40070	0.646	0.83012	0.38299-1.79925	0.9	1.03439	0.61825-1.73065	-0.0702	0.18352	0.432	11.1262	11	0.43275	9.08446	10	0.52411	9.85089e-237	0.0576352
GCST90274828	12	0.753	0.83858	0.28807-2.4411	0.323	1.43737	0.70016-2.95082	0.854	1.0567	0.58773-1.89986	0.338	0.48585	0.11833-1.99490	0.418	1.60284	0.53440-4.80741	0.03822	0.61747	0.107	17.4739	11	0.09462	17.0217	10	0.07389	1.50918e-56	0.0550851
GCST90274842	22	0.516	0.81012	0.43379-1.5129	0.705	1.10127	0.66816-1.81515	0.862	1.03513	0.70055-1.52949	0.946	0.96515	0.34687-2.68548	0.82	1.06267	0.63424-1.78052	0.04059	0.33603	0.115	30.8968	21	0.07539	29.4653	20	0.07899	5.77912e-176	0.0553182
GCST90274789	11	0.104	6.70016	0.85434-52.5458	0.417	0.66047	0.24262-1.79802	0.872	1.07561	0.44438-2.60348	0.339	0.42824	0.08181-2.24164	0.357	0.47529	0.10491-2.15332	-0.16662	0.09213	0.099	16.5184	10	0.08572	11.8443	9	0.22223	2.15975e-51	0.0564066
GCST90274838	10	0.414	0.49344	0.09878-2.4648	0.828	0.91856	0.42743-1.97398	0.873	1.05944	0.52335-2.14465	0.924	0.94513	0.30747-2.90518	0.883	0.92147	0.32088-2.64621	0.07776	0.33093	0.161	13.7616	9	0.13106	12.1364	8	0.14522	2.49909e-52	0.0540231
GCST90274807	11	0.823	1.16947	0.30803-4.4401	0.768	1.12567	0.51192-2.47528	0.875	1.05052	0.56837-1.94168	0.602	1.33314	0.46859-3.79281	0.77	1.15935	0.44206-3.04056	-0.0185	0.86302	0.948	4.07907	10	0.94371	4.04755	9	0.90826	2.08971e-52	0.0531507
GCST90274790	449	0.228	0.88722	0.73056-1.0775	0.732	0.95873	0.75348-1.21989	0.878	0.99098	0.88292-1.11226	0.896	1.03967	0.58182-1.85780	0.538	0.9312	0.74216-1.16841	0.01153	0.16623	0.064	496.258	448	0.05708	494.132	447	0.06103	0	0.052934
GCST90274826	14	0.732	0.84743	0.33597-2.1375	0.29	1.41347	0.74447-2.68366	0.883	1.03798	0.63139-1.70639	0.408	1.53799	0.57317-4.12689	0.27	1.76243	0.67148-4.62584	0.02809	0.61538	0.172	17.5152	13	0.17681	17.1353	12	0.14458	5.44025e-119	0.0534283
GCST90274835	22	0.727	0.86478	0.38709-1.9320	0.545	1.17741	0.69360-1.99870	0.898	1.0249	0.70439-1.49125	0.578	1.28909	0.53376-3.11328	0.526	1.22595	0.66010-2.27686	0.01852	0.64462	0.699	17.0752	21	0.70654	16.8558	20	0.66231	8.05364e-159	0.0519831
GCST90274792	11	0.141	0.50214	0.21726-1.1605	0.245	0.71334	0.40338-1.26147	0.914	1.03221	0.57914-1.83974	0.911	1.05877	0.39761-2.81930	0.36	0.74985	0.41632-1.35058	0.14494	0.06522	0.211	15.2555	10	0.12302	10.2417	9	0.33128	2.34582e-121	0.0525279
GCST90274768	456	0.498	1.05701	0.90038-1.2409	0.106	1.17488	0.96624-1.42857	0.923	0.99466	0.89196-1.10919	0.281	0.72596	0.40576-1.29882	0.768	1.02875	0.85214-1.24196	-0.00772	0.31174	0.116	491.462	455	0.11511	490.354	454	0.11552	0	0.0510796
GCST90274815	8	0.98	0.98516	0.32095-3.0239	0.843	1.07403	0.52895-2.18082	0.934	1.02428	0.58111-1.80542	0.631	0.7707	0.27873-2.13100	0.901	1.05135	0.49179-2.24758	0.00519	0.9397	0.76	4.54306	7	0.71553	4.53684	6	0.60443	1.23625e-72	0.0508425
GCST90274787	20	0.146	2.04733	0.81285-5.1566	0.645	0.87674	0.50115-1.53383	0.934	1.01638	0.69047-1.49612	0.899	1.05966	0.43774-2.56517	0.818	0.92602	0.48633-1.76323	-0.08369	0.11919	0.627	16.6078	19	0.61642	13.9311	18	0.73357	2.30918e-138	0.0507263
GCST90274814	11	0.99	0.99304	0.35866-2.7495	0.757	1.12828	0.52607-2.41987	0.941	1.01974	0.60817-1.70982	0.848	1.12705	0.34124-3.72239	0.62	1.25377	0.52748-2.98008	0.00381	0.95313	0.462	10.0595	10	0.43529	10.0554	9	0.34602	4.54876e-53	0.0505195
GCST90274833	29	0.149	1.58373	0.86400-2.9030	0.781	1.06286	0.69086-1.63517	0.941	1.01285	0.72058-1.42366	0.516	0.78741	0.38656-1.60392	0.979	0.99429	0.64830-1.52491	-0.05981	0.09651	0.097	39.7969	28	0.06893	35.8588	27	0.11842	1.13762e-264	0.0508588
GCST90274784	19	0.587	1.3169	0.49702-3.4893	0.846	1.05787	0.59980-1.86579	0.983	1.00452	0.66140-1.52564	0.757	1.14916	0.48317-2.73311	0.85	0.93094	0.44836-1.93296	-0.03119	0.55453	0.762	14.2301	18	0.71397	13.8666	17	0.67652	1.7881e-125	0.050052
GCST90274806	14	0.921	0.93481	0.25346-3.4477	0.922	1.03347	0.53284-2.00445	0.995	1.00149	0.60824-1.64900	0.581	1.42795	0.41598-4.90179	0.437	1.6572	0.48266-5.68996	0.00801	0.91269	0.855	7.91567	13	0.84905	7.90313	12	0.79265	1.94297e-66	0.0500037
GCST90274810	8	0.161	5.45414	0.68209-43.6123	0.441	0.67233	0.24493-1.84560	0.999	0.99946	0.42349-2.35875	0.489	0.6464	0.20019-2.08713	0.428	0.65625	0.24607-1.75018	-0.19386	0.13318	0.438	7.90349	7	0.34118	4.88853	6	0.55819	1.35274e-37	0.0500003

## Sheet: S3.2
The resluts of forward univariable MR analysis between immune factors phenotypes and the risk of HCC in UK Bio-Bank database.
id	nsnp	MR-Egger			Weighted median			Inverse variance weighted			Simple mode			Weighted mode			MR-Egger intercept		MR-PRESSO global	MR-IVW			MR-Egeer			steiger_test_pval	power
		p_value	OR	95% OR	p_value	OR	95% OR	p_value	OR	95% OR	p_value	OR	95% OR	p_value	OR	95% OR	egger intercept	p_value	p_value	Q	Q_df	Q_pval	Q	Q_df	Q_pval
GCST90274796	19	0.184	4.59078	0.53171-39.6366	0.174	2.40703	0.67767-8.54954	0.047	2.57333	1.01408-6.53005	0.251	4.0319	0.40344-40.29403	0.248	3.73468	0.42841-32.55719	-0.05857	0.56718	0.826	12.9651	18	0.79364	12.6246	17	0.76093	2.25513e-85	0.917722
GCST90274822	432	0.411	1.15517	0.81954-1.6283	0.129	1.35545	0.91508-2.00774	0.058	1.24817	0.99255-1.56963	0.924	0.93719	0.24615-3.56818	0.144	1.32157	0.91019-1.91886	0.00891	0.55296	0.631	420.522	431	0.63196	420.17	430	0.62363	0	0.563645
GCST90274814	21	0.307	0.31766	0.03734-2.7025	0.194	0.43787	0.12588-1.52304	0.07	0.44066	0.18187-1.06769	0.704	0.62318	0.05603-6.93110	0.788	0.7159	0.06493-7.89321	0.03489	0.74571	0.564	18.6118	20	0.54717	18.5035	19	0.48907	2.48993e-93	0.233425
GCST90274785	21	0.103	6.75104	0.75967-59.9952	0.12	2.75003	0.76878-9.83726	0.072	2.25678	0.92982-5.47747	0.595	1.78175	0.21871-14.51546	0.313	2.41256	0.45484-12.79654	-0.10186	0.29553	0.844	13.8375	20	0.83864	12.6804	19	0.85452	1.3387e-119	0.801473
GCST90274807	23	0.459	0.48488	0.07402-3.1762	0.132	0.39569	0.11838-1.32259	0.078	0.4619	0.19550-1.09129	0.387	0.30104	0.02094-4.32703	0.281	0.24857	0.02103-2.93822	-0.00688	0.95513	0.669	18.5517	22	0.67282	18.5485	21	0.61408	1.00359e-102	0.237552
GCST90274802	26	0.177	4.44768	0.54368-36.3852	0.623	1.31267	0.44386-3.88210	0.082	2.1983	0.90451-5.34269	0.849	1.22866	0.15046-10.03345	0.959	0.94972	0.13432-6.71503	-0.08241	0.47451	0.124	33.5792	25	0.11721	32.8565	24	0.10714	1.33893e-122	0.864671
GCST90274847	37	0.415	0.54619	0.12992-2.2962	0.532	1.35282	0.52454-3.48901	0.097	1.70628	0.90765-3.20762	0.146	4.888	0.60154-39.71913	0.689	0.67058	0.09602-4.68333	0.11657	0.09383	0.408	37.5486	36	0.39807	34.5819	35	0.48815	1.1507e-248	0.621916
GCST90274791	37	0.263	1.98897	0.60758-6.5111	0.1	2.27276	0.85486-6.04242	0.106	1.74648	0.88902-3.43096	0.32	3.03812	0.35094-26.30139	0.078	2.60568	0.92646-7.32850	-0.01661	0.79404	0.095	48.733	36	0.0764	48.6368	35	0.06255	9.96995e-298	0.740244
GCST90274813	20	0.321	3.28387	0.33394-32.2922	0.781	1.19006	0.34998-4.04665	0.109	2.04492	0.85223-4.90676	0.901	1.13611	0.15703-8.21961	0.963	1.04649	0.15796-6.93292	-0.04629	0.66542	0.936	10.5202	19	0.93893	10.3269	18	0.92071	2.13026e-93	0.643125
GCST90274775	25	0.955	0.94865	0.15612-5.7644	0.563	1.38598	0.45851-4.18947	0.11	1.89388	0.86468-4.14810	0.891	1.16337	0.13635-9.92619	0.837	0.80482	0.10458-6.19388	0.07141	0.41299	0.758	18.552	24	0.77544	17.8569	23	0.76521	8.1659e-160	0.638108
GCST90274816	20	1	0.99923	0.06313-15.8168	0.216	2.33113	0.60954-8.91516	0.141	2.1066	0.78021-5.68795	0.468	2.58854	0.20862-32.11857	0.517	2.29851	0.19476-27.12659	0.06775	0.57755	0.869	12.2934	19	0.8727	11.9717	18	0.8487	2.91526e-91	0.587586
GCST90274762	27	0.662	1.79699	0.13420-24.0629	0.066	0.277	0.07037-1.09032	0.158	0.45181	0.14994-1.36144	0.254	0.14555	0.00570-3.71607	0.297	0.1614	0.00559-4.65607	-0.14301	0.26074	0.041	39.9423	26	0.03952	37.9332	25	0.04696	3.7654e-127	0.251068
GCST90274768	448	0.773	0.9517	0.67973-1.3325	0.947	0.98529	0.63831-1.52087	0.174	0.85725	0.68659-1.07033	0.19	0.41143	0.10930-1.54863	0.77	0.94545	0.64938-1.37651	-0.01241	0.41848	0.996	376.367	447	0.99338	375.711	446	0.99319	0	0.247425
GCST90274823	24	0.599	0.62271	0.10906-3.5554	0.244	0.52667	0.17927-1.54731	0.181	0.59482	0.27769-1.27411	0.406	0.45966	0.07601-2.77986	0.199	0.39535	0.10005-1.56233	-0.006	0.95456	0.339	25.6542	23	0.31746	25.6503	22	0.267	1.44072e-151	0.204514
GCST90274761	11	0.979	1.05057	0.03065-36.0056	0.894	1.11749	0.21802-5.72777	0.191	2.29195	0.66067-7.95109	0.873	0.796	0.05258-12.05139	0.885	0.83385	0.07560-9.19750	0.07821	0.653	0.367	10.8232	10	0.37146	10.5693	9	0.30639	3.37251e-51	0.557222
GCST90274759	455	0.616	0.89526	0.58085-1.3799	0.823	1.06254	0.62527-1.80561	0.199	1.18582	0.91403-1.53843	0.559	1.55864	0.35168-6.90793	0.73	1.09605	0.65113-1.84498	0.02719	0.11189	0.146	487.969	454	0.13086	485.251	453	0.14252	0	0.314734
GCST90274805	20	0.089	0.17495	0.02619-1.1685	0.036	0.27366	0.08133-0.92085	0.226	0.57069	0.23021-1.41471	0.362	0.35274	0.03964-3.13919	0.093	0.25647	0.05672-1.15971	0.15609	0.18445	0.277	22.7778	19	0.24727	20.5981	18	0.30017	3.95254e-118	0.187887
GCST90274848	27	0.748	0.86079	0.34871-2.1249	0.715	1.10983	0.63448-1.94130	0.243	1.43062	0.78462-2.60850	0.708	1.38887	0.25437-7.58321	0.706	1.1127	0.64238-1.92737	0.11244	0.15902	0.082	43.1154	26	0.01878	39.7634	25	0.03084	0	0.437489
GCST90274842	32	0.444	1.45227	0.56573-3.7281	0.184	1.91633	0.73365-5.00558	0.29	1.37282	0.76302-2.46998	0.649	0.64478	0.09908-4.19581	0.224	1.96432	0.67535-5.71339	-0.00866	0.88092	0.469	31.4883	31	0.44181	31.4644	30	0.39284	1.25716e-224	0.243712
GCST90274833	39	0.268	1.90903	0.61921-5.8855	0.774	1.12797	0.49503-2.57019	0.301	0.73011	0.40202-1.32598	0.735	0.74302	0.13506-4.08758	0.882	1.07439	0.42009-2.74779	-0.11002	0.05913	0.197	44.5922	38	0.2142	40.4472	37	0.32063	0	0.163316
GCST90274832	24	0.738	0.67322	0.06815-6.6502	0.428	0.57033	0.14229-2.28599	0.323	0.58976	0.20686-1.68139	0.531	0.4926	0.05567-4.35852	0.48	0.52406	0.08989-3.05518	-0.01307	0.89921	0.092	33.0415	23	0.08035	33.0168	22	0.06164	3.61777e-128	0.165678
GCST90274767	28	0.54	1.41757	0.47119-4.2647	0.062	1.94664	0.96610-3.92239	0.324	1.46053	0.68798-3.10060	0.965	1.05452	0.09846-11.29438	0.121	1.78674	0.87781-3.63683	0.00563	0.94155	0.009	51.9042	27	0.00272	51.8933	26	0.00186	0	0.409783
GCST90274766	28	0.484	0.4388	0.04506-4.2730	0.841	0.88832	0.27892-2.82914	0.332	1.51366	0.65533-3.49618	0.719	0.60865	0.04183-8.85614	0.513	0.45126	0.04283-4.75472	0.11359	0.26237	0.348	29.1549	27	0.35343	27.7538	26	0.37068	3.02706e-140	0.238316
GCST90274837	20	0.957	1.06775	0.10114-11.2727	0.413	0.54685	0.12909-2.31661	0.334	0.60346	0.21654-1.68173	0.507	0.45915	0.04817-4.37707	0.566	0.47321	0.03839-5.83289	-0.06336	0.60463	0.588	17.1772	19	0.57786	16.8995	18	0.53002	1.67859e-89	0.122029
GCST90274771	27	0.606	1.44949	0.35989-5.8379	0.019	3.28531	1.21332-8.89559	0.357	1.37115	0.70006-2.68553	0.228	3.40029	0.48722-23.73044	0.079	2.98132	0.92289-9.63090	-0.00658	0.92959	0.737	19.7686	26	0.8024	19.7606	25	0.75927	1.29124e-212	0.196206
GCST90274844	39	0.969	1.0231	0.32381-3.2326	0.509	1.33112	0.56933-3.11223	0.361	1.29834	0.74164-2.27290	0.992	1.00889	0.18648-5.45833	0.951	1.03889	0.30901-3.49280	0.02994	0.6449	0.635	33.7466	38	0.66643	33.5307	37	0.63248	0	0.185494
GCST90274828	19	0.631	1.55869	0.26270-9.2484	0.336	0.53717	0.15163-1.90302	0.39	0.66982	0.26837-1.67179	0.385	0.38875	0.04847-3.11776	0.352	0.36739	0.04712-2.86453	-0.10631	0.29369	0.881	11.4014	18	0.87655	10.2273	17	0.89381	1.40073e-88	0.113154
GCST90274838	19	0.788	0.64978	0.02936-14.3804	0.247	0.41762	0.09524-1.83130	0.412	0.58789	0.16546-2.08878	0.443	0.34938	0.02530-4.82510	0.32	0.33318	0.04052-2.73980	-0.00962	0.94513	0.062	29.3169	18	0.04464	29.3085	17	0.03179	7.89427e-90	0.132826
GCST90274827	20	0.337	1.43222	0.70148-2.9242	0.078	1.95651	0.92796-4.12508	0.42	1.251	0.72570-2.15653	0.5	0.56058	0.10783-2.91426	0.145	1.79718	0.84459-3.82419	-0.03757	0.57268	0.659	13.9526	19	0.78645	13.6224	18	0.75335	4.66378e-277	0.133553
GCST90274794	17	0.526	2.00195	0.24651-16.2581	0.776	0.82487	0.21863-3.11210	0.425	0.64109	0.21481-1.91328	0.906	0.87345	0.09580-7.96367	0.916	0.89755	0.12346-6.52534	-0.12494	0.23339	0.249	19.7968	16	0.22951	17.9514	15	0.26523	2.83122e-79	0.114556
GCST90274765	26	0.561	0.63838	0.14337-2.8424	0.6	1.39488	0.40241-4.83510	0.437	1.35802	0.62736-2.93966	0.692	1.59176	0.16345-15.50130	0.628	1.47862	0.30946-7.06490	0.09197	0.2585	0.726	19.8456	25	0.75488	18.506	24	0.77779	1.53028e-154	0.150149
GCST90274804	11	0.401	0.71476	0.33868-1.5085	0.725	1.10605	0.63145-1.93736	0.456	1.18483	0.75821-1.85151	0.275	1.87161	0.64523-5.42898	0.773	1.0792	0.65194-1.78646	0.19145	0.13247	0.507	9.28075	10	0.50568	6.54431	9	0.68445	0	0.132487
GCST90274758	13	0.143	0.1311	0.01052-1.6335	0.401	1.83905	0.44380-7.62076	0.461	1.47257	0.52687-4.11572	0.848	0.79899	0.08428-7.57502	0.544	1.74634	0.30404-10.03057	0.255	0.06409	0.592	10.8185	12	0.54453	6.58312	11	0.83177	1.64417e-82	0.144797
GCST90274815	12	0.809	1.29254	0.17057-9.7948	0.531	0.6585	0.17813-2.43427	0.464	0.68462	0.24810-1.88919	0.91	1.13767	0.12790-10.12001	0.675	0.72322	0.16535-3.16328	-0.09046	0.4935	0.655	9.4971	11	0.57611	8.99196	10	0.53287	1.13196e-89	0.0949437
GCST90274789	21	0.344	3.65532	0.26655-50.1279	0.85	1.14496	0.28092-4.66651	0.464	1.49688	0.50796-4.41109	0.846	1.26509	0.12188-13.13154	0.83	1.31093	0.11376-15.10639	-0.07993	0.47102	0.252	24.0567	20	0.23993	23.3907	19	0.22057	3.00605e-95	0.175609
GCST90274764	23	0.672	0.72885	0.17240-3.0813	0.266	0.55401	0.19563-1.56891	0.47	0.7618	0.36410-1.59390	0.897	0.88998	0.15680-5.05133	0.432	0.57253	0.14614-2.24298	0.00612	0.94487	0.848	14.909	22	0.86612	14.9041	21	0.82774	3.17451e-178	0.0993913
GCST90274830	24	0.552	0.62997	0.14055-2.8237	0.58	0.74739	0.26665-2.09483	0.471	1.31131	0.62788-2.73862	0.398	0.46309	0.08046-2.66530	0.38	0.59448	0.19042-1.85597	0.08556	0.28347	0.491	22.6016	23	0.48422	21.3929	22	0.49658	1.55913e-185	0.13946
GCST90274784	29	0.447	0.51277	0.09386-2.8013	0.325	0.55842	0.17506-1.78132	0.538	0.78575	0.36474-1.69271	0.536	0.53425	0.07510-3.80032	0.423	0.55123	0.13105-2.31855	0.04094	0.58529	0.587	25.5892	28	0.59562	25.2841	27	0.55854	5.30618e-170	0.0887835
GCST90274812	20	0.875	0.79127	0.04504-13.9017	0.416	0.57548	0.15216-2.17647	0.551	0.72176	0.24717-2.10762	0.143	0.15469	0.01410-1.69759	0.448	0.4121	0.04378-3.87870	-0.00967	0.94646	0.135	26.6691	19	0.1126	26.6622	18	0.08555	7.63316e-88	0.0943108
GCST90274781	32	0.766	0.71279	0.07857-6.4669	0.144	0.47464	0.17467-1.28974	0.553	0.75451	0.29720-1.91549	0.656	0.66557	0.11279-3.92765	0.268	0.51358	0.16122-1.63605	0.00716	0.95573	0.001	65.9622	31	0.00025	65.9553	30	0.00017	6.24185e-209	0.11423
GCST90274782	17	0.84	1.1538	0.29529-4.5082	0.448	1.3299	0.63675-2.77762	0.585	1.29514	0.51139-3.28008	0.138	5.55336	0.64545-47.78035	0.353	1.41988	0.69186-2.91401	0.02267	0.8184	0.025	36.6872	16	0.00232	36.5541	15	0.00147	1.36762e-237	0.152624
GCST90274803	24	0.808	1.19507	0.28824-4.9548	0.687	0.82693	0.32817-2.08367	0.592	1.20481	0.60961-2.38114	0.805	1.24171	0.22760-6.77442	0.759	0.8569	0.32319-2.27196	0.00112	0.98994	0.666	20.087	23	0.63666	20.0868	22	0.57761	8.56967e-198	0.0894518
GCST90274774	463	0.583	0.89206	0.59376-1.3402	0.45	1.21506	0.73295-2.01428	0.593	1.06738	0.84025-1.35592	0.821	1.18543	0.27274-5.15236	0.513	1.18543	0.71209-1.97341	0.01755	0.2861	0.604	452.773	462	0.61164	451.633	461	0.61356	0	0.0860564
GCST90274826	22	0.707	1.34236	0.29507-6.1069	0.942	0.95648	0.28931-3.16217	0.594	0.80585	0.36426-1.78277	0.378	0.35526	0.03744-3.37104	0.857	0.88148	0.22672-3.42711	-0.06482	0.44567	0.369	23.1072	21	0.33829	22.4284	20	0.31772	6.61992e-156	0.0786057
GCST90274846	34	0.925	1.06805	0.27631-4.1285	0.461	0.70013	0.27124-1.80717	0.597	1.19067	0.62391-2.27227	0.922	0.90631	0.12795-6.41978	0.498	0.67421	0.21833-2.08193	0.01193	0.85821	0.482	32.903	33	0.472	32.8697	32	0.42426	1.51075e-225	0.0897866
GCST90274779	21	0.166	0.44411	0.14733-1.3388	0.047	0.38358	0.14881-0.98872	0.6	0.82638	0.40550-1.68411	0.154	6.63742	0.54171-81.32599	0.077	0.39274	0.14681-1.05069	0.09554	0.1651	0.49	15.8088	20	0.72841	13.7245	19	0.79951	4.0712e-198	0.0790851
GCST90274801	18	0.997	0.99656	0.12346-8.0444	0.742	1.23998	0.34476-4.45981	0.6	1.29908	0.48869-3.45337	0.821	1.31312	0.12808-13.46300	0.825	1.31312	0.12251-14.07508	0.03029	0.78189	0.881	10.278	17	0.89155	10.1987	16	0.85605	1.38934e-81	0.0940045
GCST90274817	27	0.994	1.00678	0.15518-6.5320	0.904	1.07658	0.32466-3.57000	0.625	0.7983	0.32389-1.96757	0.838	1.30826	0.10203-16.77556	0.814	1.34888	0.11468-15.86546	-0.02423	0.78238	0.29	29.5344	26	0.28735	29.4426	25	0.24584	1.14047e-131	0.0767287
GCST90274763	12	0.933	1.18749	0.02441-57.7676	0.867	1.17269	0.18068-7.61118	0.641	1.40954	0.33283-5.96937	0.875	1.2793	0.06380-25.65137	0.962	1.07209	0.06706-17.14052	0.01589	0.92704	0.34	13.0764	11	0.28836	13.0649	10	0.22007	4.10875e-52	0.0940714
GCST90274770	24	0.613	0.81693	0.37725-1.7691	0.876	0.95151	0.50953-1.77690	0.654	1.13631	0.64992-1.98671	0.684	0.75757	0.20192-2.84236	0.789	0.92495	0.52542-1.62828	0.08548	0.24307	0.121	32.6079	23	0.08815	30.606	22	0.10446	0	0.087567
GCST90274795	30	0.675	1.44423	0.26311-7.9276	0.949	0.96476	0.32297-2.88194	0.655	0.8365	0.38227-1.83047	0.875	1.21101	0.11423-12.83859	0.806	0.78942	0.12142-5.13229	-0.06046	0.48384	0.212	34.8432	29	0.20974	34.2277	28	0.19348	3.04283e-173	0.0726477
GCST90274777	435	0.794	1.05688	0.69740-1.6016	0.737	1.09003	0.65886-1.80335	0.655	0.94522	0.73799-1.21065	0.84	0.87083	0.22688-3.34253	0.719	1.09711	0.66189-1.81852	-0.01063	0.5127	0.745	415.027	434	0.73595	414.597	433	0.72963	0	0.0727583
GCST90274843	30	0.532	1.30062	0.57672-2.9332	0.297	1.47539	0.71045-3.06393	0.66	1.12108	0.67371-1.86550	0.889	0.89765	0.19915-4.04604	0.311	1.49913	0.69469-3.23511	-0.03014	0.64667	0.372	29.9741	29	0.4153	29.746	28	0.37546	0	0.0764937
GCST90274811	19	0.742	1.37917	0.20998-9.0584	0.316	0.50693	0.13443-1.91163	0.663	0.81333	0.32108-2.06024	0.382	0.36655	0.04084-3.28982	0.394	0.35709	0.03542-3.59964	-0.06625	0.53519	0.526	17.4931	18	0.48948	17.0904	17	0.44826	1.75403e-85	0.0683059
GCST90274772	21	0.81	1.0966	0.52319-2.2985	0.716	1.12821	0.58954-2.15909	0.665	1.1264	0.65778-1.92888	0.5	1.88651	0.30894-11.51963	0.649	1.15187	0.63221-2.09866	0.00554	0.91874	0.777	16.4474	20	0.68851	16.4367	19	0.62797	0	0.0765219
GCST90274820	26	0.946	0.95297	0.24012-3.7821	0.671	1.24998	0.44695-3.49582	0.671	1.1766	0.55612-2.48936	0.493	1.88547	0.31598-11.25064	0.604	1.34619	0.44375-4.08391	0.02574	0.72211	0.25	29.8956	25	0.22822	29.7352	24	0.19368	4.26247e-194	0.0857955
GCST90274841	26	0.37	0.41767	0.06425-2.7151	0.462	0.6758	0.23759-1.92218	0.676	0.83857	0.36723-1.91488	0.576	0.55617	0.07323-4.22382	0.272	0.40148	0.08158-1.97573	0.07731	0.42334	0.157	32.2162	25	0.15185	31.3495	24	0.14396	2.25825e-140	0.0723488
GCST90274825	19	0.43	1.43927	0.59571-3.4774	0.283	1.45412	0.73416-2.88009	0.693	1.12274	0.63188-1.99491	0.666	0.68468	0.12633-3.71096	0.334	1.44987	0.69649-3.01815	-0.04359	0.47683	0.757	12.5085	18	0.8199	11.9793	17	0.80139	1.32731e-299	0.0712873
GCST90274776	20	0.05	12.2819	1.18631-127.1548	0.12	2.76642	0.76622-9.98812	0.694	0.79978	0.26309-2.43128	0.945	1.09757	0.07922-15.20561	0.106	3.1398	0.83747-11.77163	-0.30568	0.02122	0.025	31.2012	19	0.03837	23.0448	18	0.18887	7.29247e-124	0.0747291
GCST90274786	24	0.61	1.54152	0.29976-7.9272	0.959	0.9715	0.31964-2.95273	0.735	0.87326	0.39801-1.91598	0.817	0.78198	0.09969-6.13383	0.77	1.23268	0.30836-4.92774	-0.06535	0.44643	0.634	20.1517	23	0.63274	19.5507	22	0.61112	7.67598e-145	0.0614448
GCST90274831	20	0.909	0.84515	0.04936-14.4721	0.225	0.45359	0.12660-1.62520	0.737	0.8261	0.27136-2.51487	0.748	0.6867	0.07183-6.56485	0.611	0.636	0.11438-3.53640	-0.00218	0.98647	0.085	29.1628	19	0.06347	29.1623	18	0.04643	1.50833e-111	0.0668827
GCST90274793	23	0.269	3.78816	0.37919-37.8446	0.125	2.72828	0.75669-9.83695	0.738	1.18475	0.43947-3.19394	0.339	2.84343	0.35012-23.09250	0.223	2.71721	0.57027-12.94690	-0.12524	0.2856	0.209	27.9896	22	0.17603	26.4758	21	0.18888	1.415e-125	0.0717461
GCST90274798	456	0.753	0.91993	0.54680-1.5477	0.885	0.95808	0.53632-1.71151	0.748	1.04376	0.80353-1.35581	0.994	1.00612	0.23196-4.36389	0.906	0.95125	0.41583-2.17605	0.01056	0.58219	0.495	455.451	455	0.48523	455.147	454	0.47602	0	0.0624678
GCST90274829	24	0.939	0.9248	0.12575-6.8012	0.648	1.34585	0.37623-4.81437	0.749	1.16615	0.45509-2.98823	0.792	1.41041	0.11314-17.58239	0.772	1.41041	0.14168-14.04050	0.02429	0.79736	0.458	23.5914	23	0.42671	23.5192	22	0.37293	2.12963e-105	0.0645292
GCST90274834	16	0.691	1.65161	0.14661-18.6055	0.719	1.32665	0.28522-6.17074	0.752	0.82145	0.24237-2.78407	0.811	0.69039	0.03489-13.65960	0.689	1.55405	0.18759-12.87421	-0.08283	0.52065	0.182	20.2707	15	0.16179	19.661	14	0.1412	5.79545e-89	0.063954
GCST90274810	15	0.79	0.66167	0.03355-13.0498	0.437	0.5526	0.12383-2.46594	0.753	0.81074	0.22004-2.98721	0.705	0.59282	0.04193-8.38201	0.735	0.62997	0.04577-8.67140	0.02346	0.88318	0.067	22.8401	14	0.06292	22.8007	13	0.04413	5.99446e-66	0.0648785
GCST90274800	21	0.324	0.62276	0.24921-1.5563	0.566	0.82635	0.43115-1.58378	0.753	0.91304	0.51820-1.60872	0.275	0.44724	0.10976-1.82237	0.457	0.79659	0.44246-1.43418	0.07649	0.31112	0.314	25.079	20	0.19843	23.7267	19	0.20685	0	0.0636024
GCST90274839	23	0.556	1.77523	0.27084-11.6357	0.566	1.41983	0.42900-4.69905	0.754	1.14325	0.49437-2.64382	0.812	1.32917	0.13054-13.53357	0.857	1.22765	0.13475-11.18453	-0.04542	0.61364	0.625	19.2661	22	0.62885	19.0034	21	0.58492	1.34021e-105	0.0632984
GCST90274769	29	0.67	1.48115	0.24809-8.8427	0.758	1.2006	0.37445-3.84949	0.768	1.1306	0.50059-2.55349	0.981	1.02889	0.09699-10.91513	0.908	0.87866	0.09875-7.81788	-0.02614	0.74114	0.475	27.6619	28	0.48247	27.5482	27	0.43454	1.58232e-140	0.0619346
GCST90274840	7	0.968	1.018	0.43912-2.3600	0.836	1.06243	0.59857-1.88576	0.77	1.08042	0.64321-1.81481	0.74	0.85607	0.35685-2.05365	0.874	1.05332	0.56968-1.94755	0.01829	0.86702	0.989	1.09073	6	0.98194	1.05968	5	0.95761	0	0.0611377
GCST90274778	27	0.106	6.67158	0.72455-61.4307	0.765	0.84251	0.27347-2.59560	0.781	0.89119	0.39589-2.00616	0.489	0.46674	0.05548-3.92685	0.482	0.48101	0.06425-3.60115	-0.193	0.06863	0.398	27.1998	26	0.39892	23.5788	25	0.54381	2.95063e-143	0.0583978
GCST90274797	25	0.716	1.14686	0.55365-2.3757	0.963	1.01382	0.56716-1.81225	0.782	0.93054	0.55829-1.55098	0.977	1.0285	0.15592-6.78430	0.925	1.0285	0.57612-1.83610	-0.04344	0.43795	0.867	17.3308	24	0.83421	16.7077	23	0.82335	0	0.0588622
GCST90274836	27	0.732	1.28742	0.30847-5.3732	0.605	1.25841	0.52617-3.00964	0.783	1.09214	0.58380-2.04309	0.811	0.82211	0.16825-4.01707	0.824	0.88937	0.31993-2.47238	-0.02034	0.80381	0.732	21.3445	26	0.72397	21.2814	25	0.67682	4.46531e-197	0.0598168
GCST90274818	28	0.965	1.03512	0.22545-4.7526	0.597	0.7277	0.22366-2.36763	0.789	1.1186	0.49312-2.53741	0.571	0.47082	0.03580-6.19169	0.616	0.6021	0.08485-4.27264	0.00924	0.90605	0.297	30.3778	27	0.29745	30.3612	26	0.25292	8.55123e-166	0.0612989
GCST90274808	17	0.193	0.21919	0.02467-1.9473	0.814	1.18603	0.28529-4.93066	0.797	1.15129	0.39323-3.37068	0.328	3.6545	0.29400-45.42670	0.497	2.46063	0.19472-31.09456	0.20124	0.11324	0.233	19.895	16	0.22499	16.7376	15	0.33479	1.26749e-78	0.0616757
GCST90274783	5	0.775	1.15184	0.47421-2.7978	0.906	1.03749	0.56202-1.91523	0.802	1.07459	0.61233-1.88581	0.668	1.35336	0.37497-4.88463	0.93	1.02952	0.56038-1.89140	-0.02252	0.85556	0.788	1.3827	4	0.8472	1.34341	3	0.71885	5.16751e-292	0.0575195
GCST90274821	22	0.188	2.66068	0.65252-10.8491	0.784	1.16564	0.39042-3.48013	0.835	1.0824	0.51262-2.28551	0.615	1.68608	0.22729-12.50763	0.364	1.82259	0.51356-6.46830	-0.11433	0.15419	0.687	17.1192	21	0.70386	14.9259	20	0.78063	2.83667e-188	0.0560781
GCST90274799	24	0.576	1.86555	0.21622-16.0961	0.662	0.77009	0.23913-2.47999	0.855	0.92434	0.39658-2.15444	0.81	0.74177	0.06678-8.23906	0.87	0.83781	0.10219-6.86891	-0.06436	0.49464	0.506	22.496	23	0.4905	22.0134	22	0.45909	1.46234e-109	0.0537432
GCST90274792	21	0.624	1.37433	0.39328-4.8026	0.673	1.24472	0.45019-3.44148	0.881	0.94531	0.45238-1.97536	0.823	0.81298	0.13497-4.89690	0.664	1.28068	0.42571-3.85270	-0.05926	0.47705	0.737	15.9422	20	0.72021	15.416	19	0.69582	4.01806e-171	0.0524094
GCST90274787	28	0.407	2.14358	0.36389-12.6271	0.782	1.16592	0.39307-3.45837	0.883	1.056	0.51241-2.17622	0.898	1.12104	0.19942-6.30199	0.78	1.2118	0.31937-4.59798	-0.08585	0.39928	0.985	13.8054	27	0.98308	13.071	26	0.98333	3.83438e-177	0.052601
GCST90274819	21	0.628	1.69609	0.20706-13.8930	0.967	0.97434	0.27970-3.39413	0.892	1.06528	0.42832-2.64945	0.655	1.72875	0.16205-18.44195	0.809	0.747	0.07212-7.73740	-0.04425	0.63606	0.612	17.6591	20	0.60986	17.4278	19	0.56091	1.90821e-92	0.0523859
GCST90274780	28	0.373	0.57306	0.17203-1.9089	0.833	0.90065	0.33970-2.38788	0.895	1.048	0.52381-2.09675	0.922	0.92192	0.18459-4.60450	0.671	0.78065	0.25186-2.41962	0.07556	0.23975	0.862	19.8843	27	0.83557	18.4367	26	0.85931	4.7694e-194	0.052083
GCST90274845	18	0.405	2.47397	0.31000-19.7439	0.297	2.10699	0.51914-8.55145	0.917	1.05382	0.39505-2.81114	0.233	6.16185	0.34576-109.81144	0.274	5.72467	0.27706-118.28414	-0.11942	0.37379	0.395	17.9414	17	0.39255	17.0493	16	0.38241	1.70301e-82	0.05144
GCST90274809	19	0.861	0.85412	0.14991-4.8664	0.889	1.09563	0.30365-3.95318	0.921	0.95352	0.37396-2.43125	0.677	1.56511	0.19616-12.48757	0.68	1.56511	0.19275-12.70854	0.01553	0.88478	0.847	12.4169	18	0.82498	12.3953	17	0.77563	1.99933e-86	0.0511282
GCST90274806	18	0.476	2.46565	0.21891-27.7713	0.959	0.96501	0.24722-3.76678	0.934	0.95901	0.35492-2.59131	0.852	0.80123	0.08061-7.96344	0.921	0.88507	0.08259-9.48442	-0.10238	0.41351	0.484	16.977	17	0.45592	16.2607	16	0.43492	6.81247e-82	0.0508269
GCST90274790	448	0.647	0.90809	0.60156-1.3708	0.437	0.8076	0.47101-1.38471	0.948	1.00787	0.79716-1.27429	0.056	4.3731	0.96671-19.78259	0.299	0.76446	0.46069-1.26852	0.0102	0.54634	0.493	445.809	447	0.50701	445.445	446	0.49851	0	0.0505464
GCST90274773	23	0.886	0.86778	0.12727-5.9170	0.471	0.64922	0.20045-2.10265	0.962	0.98092	0.44301-2.17197	0.761	0.75136	0.12159-4.64287	0.518	0.62384	0.15254-2.55126	0.0126	0.89197	0.963	11.5083	22	0.96672	11.4894	21	0.95239	7.06724e-145	0.0502504
GCST90274824	23	0.18	0.40326	0.11159-1.4573	0.948	0.9728	0.42765-2.21291	0.964	0.98495	0.51155-1.89644	0.663	1.40484	0.31142-6.33741	0.984	0.99098	0.42197-2.32728	0.13132	0.13211	0.292	26.289	22	0.23948	23.5375	21	0.316	1.10351e-263	0.0502788
GCST90274760	24	0.808	0.78769	0.11773-5.2704	0.556	0.7127	0.23083-2.20056	0.978	0.98805	0.42714-2.28557	0.532	0.47766	0.04875-4.68028	0.489	0.44793	0.04766-4.20963	0.02472	0.79697	0.932	13.7018	23	0.93509	13.634	22	0.91396	1.71631e-109	0.050094
GCST90274788	24	0.848	0.85115	0.16758-4.3230	0.891	1.07719	0.37028-3.13373	0.991	0.99564	0.47909-2.06912	0.747	0.73959	0.12135-4.50751	0.804	1.17281	0.33711-4.08027	0.0183	0.83423	0.745	18.2918	23	0.74148	18.2469	22	0.69125	1.77541e-173	0.0500158
GCST90274835	33	0.18	2.63992	0.65895-10.5762	0.787	1.13627	0.45075-2.86433	0.994	1.00232	0.51962-1.93344	0.884	1.14653	0.18613-7.06254	0.956	1.03854	0.27492-3.92327	-0.09982	0.13066	0.986	17.4926	32	0.98249	15.0819	31	0.99274	2.48255e-213	0.0500055
