# Supplementary material for: Exploring Hepatocellular Carcinoma Etiology through Multi-omics Bioinformatics
Source: Research Square preprint supplement (doi:10.21203/rs.3.rs-6188338/v1), 2025-04-21
Supplement: Supplementary file 4 [file ca0e9aee17f34e2c7616ae08.xlsx]

## Sheet: Content
Content
S1.1. The resluts of forward univariable MR analysis between immune cells phenotypes and the risk of HCC in FinnGen database.
S1.2. The resluts of forward univariable MR analysis between immune cells phenotypes and the risk of HCC in UK Bio-Bank database.

## Sheet: S1.1_FinnGen
S1.1. The resluts of forward univariable MR analysis between immune cells phenotypes and the risk of HCC in FinnGen database.
id	nsnp	MR-Egger			Weighted median			Inverse variance weighted			Simple mode			Weighted mode			MR-Egger intercept		MR-PRESSO global	MR-IVW			MR-Egeer			steiger_test_pval	power
		p_value	OR	95% OR	p_value	OR	95% OR	p_value	OR	95% OR	p_value	OR	95% OR	p_value	OR	95% OR	egger intercept	p_value	p_value	Q	Q_df	Q_pval	Q	Q_df	Q_pval
ebi-a-GCST90001744	5	0.041	0.57654	0.42148-0.7886	0.032	0.70255	0.50893-0.96982	0.002	0.70174	0.55888-0.88111	0.8	1.13897	0.44490-2.91579	0.058	0.6753	0.50441-0.90409	0.12834	0.17146	0.451	3.99406	4	0.40681	0.79154	3	0.85149	8.3675e-25	0.21862
ebi-a-GCST90001707	13	0.049	0.77552	0.61912-0.9714	0.002	0.82029	0.72218-0.93173	0.004	0.8032	0.69313-0.93074	0.85	0.97017	0.71424-1.31780	0.015	0.83617	0.73944-0.94554	0.02891	0.68604	0.183	20.9148	12	0.05164	20.5922	11	0.03785	0	0.929192
ebi-a-GCST90001710	13	0.038	0.76403	0.61119-0.9551	0.004	0.82036	0.71569-0.94033	0.004	0.78476	0.66571-0.92509	0.883	0.9715	0.66619-1.41673	0.013	0.82482	0.72443-0.93912	0.02227	0.72201	0.157	23.0583	12	0.02724	22.7823	11	0.01897	0	0.9214
ebi-a-GCST90001886	7	0.136	1.33273	0.97023-1.8307	0.029	1.29935	1.02758-1.64300	0.004	1.28811	1.08220-1.53318	0.368	1.1665	0.85524-1.59104	0.082	1.29438	1.01605-1.64896	-0.02463	0.81144	0.855	3.14045	6	0.79102	3.0772	5	0.68808	8.00571e-59	0.48222
ebi-a-GCST90001814	6	0.065	0.91021	0.84601-0.9793	0.022	0.90856	0.83715-0.98606	0.004	0.91554	0.86155-0.97291	0.825	0.98615	0.87680-1.10914	0.053	0.90927	0.84461-0.97889	0.01787	0.79247	0.898	1.31188	5	0.9337	1.23278	4	0.87267	4.29283e-30	0.0653499
ebi-a-GCST90001474	13	0.051	0.79875	0.65337-0.9765	0.071	0.80856	0.64181-1.01864	0.005	0.80957	0.69857-0.93819	0.344	0.8379	0.58945-1.19107	0.062	0.80681	0.65738-0.99020	0.00596	0.85032	0.756	8.84519	12	0.71609	8.80786	11	0.63962	8.91602e-168	0.480118
ebi-a-GCST90001711	12	0.049	0.79071	0.64373-0.9713	0.006	0.82852	0.72488-0.94697	0.006	0.81012	0.69649-0.94229	0.915	1.01808	0.73777-1.40490	0.017	0.8299	0.72860-0.94529	0.0202	0.72686	0.248	17.9755	11	0.08215	17.7465	10	0.05939	0	0.845595
ebi-a-GCST90001937	9	0.308	2.25773	0.52849-9.6450	0.002	2.26113	1.36370-3.74915	0.006	1.73862	1.16800-2.58803	0.035	2.35627	1.21201-4.58081	0.029	2.35627	1.25192-4.43480	-0.04337	0.72339	0.36	9.67474	8	0.2886	9.49063	7	0.21932	6.43778e-51	0.989768
ebi-a-GCST90001716	14	0.029	0.78315	0.64597-0.9495	0.005	0.83229	0.73168-0.94673	0.011	0.83427	0.72584-0.95890	0.939	1.01427	0.70860-1.45178	0.012	0.82611	0.72612-0.93986	0.04984	0.36742	0.16	21.4864	13	0.06385	20.0226	12	0.06666	0	0.81273
ebi-a-GCST90001457	11	0.031	0.37567	0.17722-0.7964	0.013	0.57319	0.36932-0.88962	0.012	0.66926	0.48836-0.91716	0.07	0.52355	0.28013-0.97851	0.046	0.51706	0.29337-0.91132	0.12718	0.13142	0.44	9.84463	10	0.45423	7.09119	9	0.62763	2.6879e-58	0.578807
ebi-a-GCST90001982	14	0.043	0.79695	0.65436-0.9706	0.185	0.86647	0.70109-1.07087	0.018	0.83706	0.72278-0.96941	0.246	0.80936	0.57548-1.13830	0.022	0.75179	0.60656-0.93180	0.03376	0.47862	0.855	5.25686	13	0.96909	4.72202	12	0.96663	5.45868e-73	0.192784
ebi-a-GCST90001701	5	0.48	0.78928	0.44331-1.4053	0.088	0.75974	0.55400-1.04187	0.019	0.75101	0.59074-0.95475	0.632	0.87906	0.53920-1.43314	0.458	0.82915	0.53023-1.29658	-0.02584	0.85983	0.352	4.5162	4	0.34063	4.46124	3	0.21577	8.64094e-56	0.311654
ebi-a-GCST90001719	12	0.046	0.80301	0.66510-0.9695	0.005	0.83629	0.73778-0.94795	0.021	0.8514	0.74234-0.97648	0.974	1.00652	0.68919-1.46996	0.014	0.82944	0.73152-0.94047	0.04624	0.39119	0.241	17.0988	11	0.10499	15.8275	10	0.10468	0	0.718975
ebi-a-GCST90001416	9	0.186	0.91149	0.80518-1.0318	0.094	0.89936	0.79422-1.01842	0.025	0.89098	0.80544-0.98562	0.159	0.70229	0.44956-1.09708	0.079	0.90186	0.81541-0.99747	-0.0271	0.52462	0.554	8.15013	8	0.41894	7.65962	7	0.36356	8.90971e-45	0.0885601
ebi-a-GCST90001929	4	0.345	0.46619	0.13754-1.5802	0.015	0.53772	0.32583-0.88738	0.026	0.63025	0.42014-0.94543	0.194	0.52643	0.24773-1.11865	0.176	0.51821	0.24932-1.07712	0.05992	0.65272	0.454	2.9968	3	0.39212	2.63538	2	0.26775	5.03251e-23	0.338753
ebi-a-GCST90001437	11	0.115	0.40743	0.14879-1.1157	0.087	0.67074	0.42484-1.05896	0.031	0.68276	0.48285-0.96544	0.366	0.70989	0.34917-1.44328	0.274	0.70156	0.38471-1.27937	0.1123	0.31257	0.848	5.91045	10	0.82273	4.76603	9	0.85421	8.18632e-57	0.464801
ebi-a-GCST90001620	16	0.223	1.11897	0.94135-1.3301	0.166	1.12303	0.95308-1.32327	0.034	1.13967	1.01017-1.28576	0.12	1.21052	0.96464-1.51908	0.133	1.12497	0.97283-1.30090	0.01114	0.77605	0.982	6.22942	15	0.97563	6.1453	14	0.9627	1.5417e-162	0.270344
ebi-a-GCST90001704	15	0.07	0.82663	0.68423-0.9987	0.016	0.85579	0.75373-0.97167	0.034	0.8639	0.75455-0.98909	0.815	1.04084	0.74923-1.44595	0.026	0.84036	0.73309-0.96333	0.037	0.51501	0.102	24.8711	14	0.03586	24.0426	13	0.03074	0	0.658227
ebi-a-GCST90001713	10	0.019	0.46722	0.28158-0.7752	0.003	0.599	0.42486-0.84451	0.036	0.71801	0.52717-0.97794	0.646	0.85855	0.45761-1.61078	0.016	0.62579	0.45819-0.85468	0.1157	0.08519	0.249	12.081	9	0.20878	8.15211	8	0.41875	1.71138e-86	0.531833
ebi-a-GCST90001444	10	0.528	1.09458	0.83661-1.4321	0.166	1.1881	0.93081-1.51651	0.036	1.22705	1.01301-1.48631	0.361	1.19961	0.82780-1.73843	0.186	1.19304	0.93671-1.51952	0.05707	0.26869	0.604	8.64746	9	0.47043	7.23474	8	0.51153	3.02209e-52	0.251328
ebi-a-GCST90001884	18	0.315	0.83051	0.58481-1.1794	0.273	0.88178	0.70426-1.10406	0.037	0.84376	0.71900-0.99015	0.207	0.79047	0.55648-1.12284	0.51	0.91681	0.71177-1.18092	0.00556	0.92208	0.858	10.6736	17	0.87302	10.6637	16	0.82975	0	0.600304
ebi-a-GCST90002054	6	0.984	1.00913	0.43642-2.3334	0.09	0.71214	0.48069-1.05505	0.041	0.72674	0.53486-0.98745	0.123	0.55467	0.29767-1.03356	0.12	0.62493	0.38223-1.02173	-0.08964	0.45586	0.657	2.92486	5	0.71157	2.24467	4	0.69086	1.32349e-57	0.435008
ebi-a-GCST90001898	15	0.228	0.87634	0.71423-1.0752	0.404	0.91585	0.74501-1.12587	0.044	0.86092	0.74427-0.99585	0.808	1.03997	0.76291-1.41766	0.319	0.90447	0.74772-1.09409	-0.00843	0.81239	0.647	12.4602	14	0.5694	12.4015	13	0.49503	9.56435e-122	0.253854
ebi-a-GCST90001409	13	0.014	0.4659	0.27800-0.7808	0.113	0.74058	0.51071-1.07392	0.045	0.75114	0.56818-0.99301	0.306	0.74801	0.43927-1.27372	0.108	0.70776	0.47914-1.04544	0.10589	0.06231	0.31	14.8544	12	0.24949	10.5516	11	0.48156	4.49138e-66	0.355524
ebi-a-GCST90001720	16	0.037	0.79134	0.64871-0.9653	0.016	0.8413	0.73091-0.96836	0.045	0.86732	0.75471-0.99674	0.999	1.00032	0.69577-1.43817	0.013	0.81723	0.71016-0.94045	0.06885	0.23361	0.179	22.3923	15	0.09792	20.1606	14	0.12516	0	0.570722
ebi-a-GCST90001422	11	0.469	1.1069	0.85045-1.4407	0.168	1.18156	0.93183-1.49822	0.05	1.20808	1.00022-1.45913	0.343	1.19158	0.84386-1.68258	0.155	1.19158	0.95325-1.48949	0.04743	0.37261	0.434	11.8275	10	0.29676	10.7737	9	0.29154	3.52634e-57	0.2352
ebi-a-GCST90001402	9	0.202	0.71969	0.45505-1.1382	0.259	0.81567	0.57257-1.16200	0.051	0.76803	0.58894-1.00158	0.32	0.76336	0.46356-1.25706	0.173	0.71963	0.46758-1.10755	0.02102	0.73813	0.498	7.68145	8	0.46519	7.55088	7	0.37386	7.3676e-46	0.234708
ebi-a-GCST90001721	7	0.074	0.76388	0.60464-0.9651	0.039	0.74983	0.57027-0.98592	0.051	0.82509	0.67995-1.00120	0.492	0.82432	0.49107-1.38373	0.078	0.75948	0.58898-0.97933	0.04687	0.30167	0.491	4.23631	6	0.64473	2.91078	5	0.71374	8.74269e-37	0.132187
ebi-a-GCST90001709	15	0.152	0.8569	0.70248-1.0453	0.02	0.85884	0.75568-0.97608	0.051	0.86964	0.75560-1.00090	0.774	1.04387	0.78262-1.39232	0.02	0.84197	0.74041-0.95745	0.01212	0.83388	0.091	26.5182	14	0.02222	26.4251	13	0.0149	0	0.621212
ebi-a-GCST90002093	6	0.555	0.68276	0.21380-2.1804	0.038	0.66453	0.45199-0.97703	0.052	0.69147	0.47688-1.00261	0.164	0.61239	0.33943-1.10484	0.157	0.62918	0.36443-1.08625	0.0035	0.98283	0.198	8.74659	5	0.11961	8.74544	4	0.06779	1.93941e-32	0.564254
ebi-a-GCST90001894	15	0.133	0.8227	0.64821-1.0442	0.26	0.87704	0.69798-1.10203	0.054	0.85873	0.73544-1.00268	0.68	1.07854	0.75822-1.53420	0.398	0.91165	0.74046-1.12242	0.0205	0.65046	0.625	12.0744	14	0.60033	11.8593	13	0.53921	6.37452e-129	0.271165
ebi-a-GCST90001791	14	0.617	1.12456	0.71798-1.7614	0.152	1.28051	0.91296-1.79604	0.057	1.2689	0.99251-1.62225	0.249	1.40686	0.80862-2.44770	0.138	1.39745	0.92269-2.11648	0.03264	0.54028	0.704	9.86345	13	0.70506	9.4661	12	0.66269	6.55252e-126	0.633845
ebi-a-GCST90002113	6	0.366	0.56774	0.19086-1.6889	0.227	0.77132	0.50616-1.17539	0.058	0.729	0.52550-1.01131	0.398	0.78777	0.47473-1.30721	0.328	0.77347	0.48600-1.23100	0.05809	0.66202	0.762	3.20149	5	0.66895	2.97942	4	0.56127	6.27663e-43	0.326143
ebi-a-GCST90001617	10	0.188	0.90394	0.78771-1.0373	0.189	0.91209	0.79500-1.04642	0.058	0.89076	0.79019-1.00412	0.534	0.87136	0.57409-1.32258	0.215	0.91273	0.79815-1.04377	-0.01558	0.68199	0.564	7.07163	9	0.62966	6.89095	8	0.54844	3.67884e-51	0.0938413
ebi-a-GCST90001829	13	0.099	0.84219	0.69885-1.0149	0.017	0.85776	0.75595-0.97328	0.059	0.87887	0.76872-1.00481	0.84	1.03589	0.74079-1.44855	0.029	0.84393	0.73764-0.96554	0.03546	0.52242	0.162	19.9834	12	0.0674	19.2207	11	0.05724	0	0.543944
ebi-a-GCST90001466	13	0.155	0.74206	0.50586-1.0886	0.272	0.83395	0.60319-1.15300	0.06	0.79723	0.62974-1.00927	0.14	0.71645	0.47372-1.08354	0.211	0.81038	0.59314-1.10719	0.02161	0.65075	0.763	9.03042	12	0.70033	8.81385	11	0.63907	1.77116e-67	0.271182
ebi-a-GCST90001571	16	0.671	0.91515	0.61304-1.3661	0.171	0.7997	0.58053-1.10161	0.06	0.81281	0.65497-1.00869	0.317	0.74482	0.42635-1.30118	0.242	0.72159	0.42696-1.21955	-0.03296	0.49917	0.344	15.8826	15	0.3899	15.3547	14	0.35435	3.63469e-95	0.308169
ebi-a-GCST90001933	12	0.245	1.17688	0.90869-1.5242	0.129	1.20994	0.94618-1.54723	0.06	1.18562	0.99288-1.41577	0.719	1.08077	0.71592-1.63157	0.178	1.1674	0.94534-1.44162	0.0041	0.93753	0.564	10.9186	11	0.45011	10.9115	10	0.36445	3.25197e-85	0.277296
ebi-a-GCST90002060	13	0.327	1.09956	0.91719-1.3182	0.221	1.12497	0.93161-1.35846	0.06	1.1422	0.99420-1.31224	0.048	1.35314	1.03349-1.77164	0.255	1.11436	0.93318-1.33071	0.02183	0.53604	0.921	6.11879	12	0.90998	5.71075	11	0.89195	7.99372e-79	0.185595
ebi-a-GCST90001906	10	0.218	0.6318	0.32226-1.2387	0.044	0.68246	0.47057-0.98977	0.061	0.76997	0.58573-1.01216	0.217	0.68218	0.38777-1.20009	0.107	0.67083	0.43335-1.03845	0.04566	0.54341	0.463	9.10931	9	0.42725	8.67273	8	0.37065	5.29516e-59	0.341833
ebi-a-GCST90001680	10	0.131	0.69232	0.45129-1.0621	0.078	0.74278	0.53392-1.03334	0.062	0.78615	0.61077-1.01190	0.34	0.76487	0.45390-1.28887	0.105	0.71003	0.48947-1.02998	0.03678	0.49149	0.978	2.15769	9	0.98872	1.63798	8	0.99017	3.3175e-57	0.270079
ebi-a-GCST90002001	9	0.461	1.36724	0.62258-3.0025	0.204	1.32324	0.85854-2.03948	0.062	1.36245	0.98407-1.88632	0.456	1.27237	0.69598-2.32612	0.31	1.30734	0.80487-2.12348	-0.0007	0.99261	0.876	4.08631	8	0.84925	4.08622	7	0.7698	1.81984e-59	0.589427
ebi-a-GCST90001551	15	0.058	1.26889	1.01399-1.5879	0.121	1.2218	0.94838-1.57404	0.063	1.1951	0.99054-1.44190	0.777	0.92295	0.53532-1.59128	0.105	1.22433	0.97356-1.53970	-0.03	0.35581	0.707	11.9962	14	0.60661	11.0794	13	0.60416	2.52804e-82	0.296038
ebi-a-GCST90002029	9	0.133	1.64071	0.92620-2.9064	0.167	1.29084	0.89836-1.85478	0.064	1.28369	0.98582-1.67155	0.52	1.22605	0.67726-2.21953	0.437	1.25079	0.73161-2.13839	-0.05796	0.37456	0.534	6.51673	8	0.58955	5.61746	7	0.58506	6.37477e-58	0.464808
ebi-a-GCST90001624	10	0.966	0.98707	0.55445-1.7573	0.325	1.17161	0.85449-1.60643	0.073	1.24156	0.98041-1.57227	0.266	1.39863	0.80287-2.43644	0.879	0.97463	0.70696-1.34364	0.05297	0.41637	0.385	9.27207	9	0.41255	8.49238	8	0.38691	7.64907e-73	0.367614
ebi-a-GCST90001491	10	0.27	0.88983	0.73368-1.0792	0.105	0.9038	0.79990-1.02119	0.076	0.90817	0.81662-1.00997	0.276	0.87749	0.70351-1.09450	0.152	0.90248	0.79371-1.02616	0.01346	0.8102	0.84	5.42537	9	0.79576	5.36375	8	0.71808	0	0.312153
ebi-a-GCST90001705	12	0.092	0.83379	0.68865-1.0095	0.02	0.8601	0.75733-0.97682	0.076	0.88085	0.76578-1.01321	0.668	1.07736	0.77342-1.50074	0.014	0.82564	0.72557-0.93952	0.04829	0.42084	0.135	19.8924	11	0.04684	18.5829	10	0.04589	0	0.526435
ebi-a-GCST90001421	7	0.256	1.11195	0.94559-1.3076	0.093	1.13258	0.97934-1.30981	0.076	1.12785	0.98739-1.28830	0.332	1.29369	0.80158-2.08792	0.145	1.13063	0.97921-1.30545	0.01311	0.77584	0.942	2.8479	6	0.82768	2.75755	5	0.7373	2.98963e-35	0.0911301
ebi-a-GCST90001800	20	0.124	0.83323	0.66778-1.0397	0.145	0.86522	0.71225-1.05105	0.078	0.88004	0.76356-1.01428	0.279	0.84397	0.62624-1.13739	0.095	0.85043	0.70995-1.01870	0.02107	0.53606	0.57	17.7493	19	0.53924	17.3514	18	0.49909	1.68451e-274	0.300242
ebi-a-GCST90001449	10	0.987	1.00364	0.65797-1.5309	0.305	0.85577	0.63554-1.15231	0.078	0.81299	0.64555-1.02385	0.062	0.52315	0.28823-0.94952	0.699	1.0591	0.79925-1.40343	-0.08954	0.28008	0.278	9.75181	9	0.37095	8.35086	8	0.39997	3.99841e-53	0.214092
ebi-a-GCST90001429	13	0.128	1.24117	0.95997-1.6047	0.165	1.22171	0.92073-1.62107	0.08	1.19276	0.97922-1.45287	0.451	1.23108	0.72947-2.07763	0.14	1.23108	0.95149-1.59283	-0.01728	0.64493	0.812	8.77415	12	0.72209	8.54969	11	0.66338	1.14808e-69	0.240733
ebi-a-GCST90001855	10	0.037	0.71531	0.55042-0.9296	0.102	0.84589	0.69195-1.03408	0.082	0.86902	0.74204-1.01773	0.701	0.93888	0.68710-1.28293	0.124	0.84729	0.69984-1.02580	0.09183	0.10548	0.727	6.80713	9	0.65719	3.47735	8	0.90094	4.53442e-185	0.307312
ebi-a-GCST90001945	7	0.341	1.16451	0.87706-1.5462	0.182	1.18325	0.92399-1.51526	0.082	1.17563	0.97969-1.41076	0.177	1.41043	0.90730-2.19257	0.134	1.4016	0.95632-2.05421	0.00607	0.9299	0.26	7.3464	6	0.29	7.33385	5	0.19697	1.86007e-57	0.213719
ebi-a-GCST90001932	10	0.032	0.36043	0.16661-0.7797	0.275	0.82056	0.57537-1.17023	0.083	0.77993	0.58901-1.03275	0.645	0.88957	0.55001-1.43876	0.419	0.83842	0.55752-1.26083	0.17236	0.07101	0.358	10.6215	9	0.30254	6.2913	8	0.61464	8.49729e-71	0.360016
ebi-a-GCST90001662	8	0.639	1.12923	0.69715-1.8291	0.361	1.20863	0.80481-1.81507	0.083	1.31511	0.96503-1.79219	0.948	1.02069	0.56565-1.84180	0.544	1.14541	0.75448-1.73891	0.04651	0.45019	0.656	5.35583	7	0.61663	4.70375	6	0.58233	5.35606e-46	0.405324
ebi-a-GCST90001944	7	0.345	1.16359	0.87526-1.5469	0.196	1.17694	0.91937-1.50666	0.084	1.17512	0.97879-1.41082	0.181	1.40564	0.90427-2.18501	0.134	1.40121	0.95673-2.05219	0.00628	0.92771	0.259	7.37279	6	0.28774	7.3594	5	0.19525	6.87211e-58	0.213928
ebi-a-GCST90001698	563	0.111	1.00004	0.99999-1.0001	0.536	1.00002	0.99995-1.00009	0.084	1.00003	1.00000-1.00007	0.761	1.00002	0.99988-1.00017	0.631	1.00002	0.99993-1.00011	-0.00651	0.61936	0.644	552.31	562	0.60673	552.063	561	0.59806	NA	0.0500006
ebi-a-GCST90001915	7	0.161	1.38295	0.94005-2.0345	0.167	1.31857	0.89072-1.95193	0.087	1.2914	0.96343-1.73102	0.879	0.96061	0.58586-1.57507	0.146	1.33738	0.95106-1.88061	-0.0268	0.61621	0.733	3.5667	6	0.73508	3.28153	5	0.65667	1.4431e-36	0.317666
ebi-a-GCST90001682	5	0.159	0.05306	0.00241-1.1666	0.138	1.49329	0.87938-2.53578	0.087	1.4793	0.94414-2.31782	0.381	1.47152	0.68191-3.17545	0.38	1.47152	0.68237-3.17327	0.53807	0.12316	0.368	4.99424	4	0.28789	0.46294	3	0.92695	2.77019e-28	0.542327
ebi-a-GCST90001596	11	0.718	0.95666	0.75760-1.2080	0.381	0.90728	0.72973-1.12804	0.088	0.86125	0.72535-1.02261	0.065	0.64727	0.42870-0.97729	0.348	0.91228	0.75989-1.09523	-0.06074	0.22453	0.891	3.78417	10	0.95656	2.08321	9	0.99008	5.09068e-71	0.148349
ebi-a-GCST90001772	15	0.102	0.85938	0.72602-1.0172	0.753	0.97182	0.81314-1.16147	0.09	0.89042	0.77848-1.01846	0.385	0.85832	0.61454-1.19880	0.274	0.91723	0.79046-1.06433	0.02559	0.49294	0.223	17.9094	14	0.21094	17.2489	13	0.18817	1.60436e-117	0.149759
ebi-a-GCST90001975	9	0.264	0.94142	0.85396-1.0378	0.216	0.94027	0.85278-1.03673	0.093	0.9285	0.85141-1.01258	0.317	0.8658	0.66456-1.12798	0.181	0.93793	0.86094-1.02182	-0.02564	0.56338	0.903	2.98682	8	0.93518	2.61907	7	0.91787	4.00383e-47	0.07004
ebi-a-GCST90001484	17	0.075	0.86085	0.73823-1.0038	0.13	0.9021	0.78947-1.03081	0.096	0.9148	0.82384-1.01581	0.711	0.9553	0.75340-1.21131	0.17	0.91413	0.80885-1.03312	0.03846	0.30603	0.897	9.9571	16	0.86886	8.83407	15	0.88603	0	0.307995
ebi-a-GCST90001696	36	0.103	1.00279	0.99953-1.0061	0.214	1.00247	0.99857-1.00638	0.096	1.00236	0.99958-1.00514	0.858	1.0005	0.99512-1.00590	0.16	1.00256	0.99907-1.00606	-0.01161	0.62681	0.771	29.5794	35	0.72703	29.3387	34	0.69549	2.25381e-271	0.0500953
ebi-a-GCST90001927	13	0.242	1.35564	0.83668-2.1965	0.011	1.50642	1.09961-2.06374	0.096	1.25514	0.96040-1.64034	0.162	1.46671	0.88680-2.42585	0.04	1.52197	1.06410-2.17686	-0.02049	0.70936	0.124	18.6546	12	0.09721	18.4097	11	0.07255	9.52936e-69	0.451899
ebi-a-GCST90001400	8	0.237	0.89793	0.76464-1.0544	0.099	0.89803	0.79044-1.02025	0.097	0.89837	0.79150-1.01967	0.119	0.66654	0.42598-1.04295	0.09	0.90001	0.81033-0.99960	0.0006	0.99121	0.522	10.9549	7	0.1406	10.9546	6	0.08979	1.39429e-41	0.0811793
ebi-a-GCST90001965	11	0.083	0.87199	0.75966-1.0009	0.119	0.88596	0.76101-1.03143	0.099	0.90516	0.80417-1.01882	0.798	1.05864	0.69222-1.61901	0.101	0.88149	0.76876-1.01074	0.03639	0.32878	0.717	3.23791	10	0.97526	2.17185	9	0.98845	1.79034e-63	0.10091
ebi-a-GCST90001896	7	0.497	0.81262	0.46638-1.4159	0.073	0.75879	0.56097-1.02637	0.1	0.79797	0.60998-1.04391	0.087	0.55849	0.31911-0.97742	0.134	0.76136	0.55919-1.03662	-0.00597	0.9426	0.434	6.7584	6	0.34377	6.75066	5	0.23985	4.56335e-102	0.410769
ebi-a-GCST90001984	7	0.264	0.67201	0.36192-1.2478	0.176	0.83028	0.63421-1.08696	0.105	0.82669	0.65670-1.04068	0.242	0.80378	0.57811-1.11754	0.147	0.81086	0.63349-1.03788	0.0592	0.51124	0.827	3.23813	6	0.77842	2.73851	5	0.74022	4.99608e-115	0.296366
ebi-a-GCST90001453	10	0.411	0.76069	0.40981-1.4120	0.162	0.73655	0.48000-1.13021	0.106	0.7822	0.58070-1.05361	0.374	0.74341	0.39957-1.38311	0.6	0.84393	0.45761-1.55635	0.00858	0.92218	0.439	7.92618	9	0.5416	7.91602	8	0.44172	2.04263e-52	0.269875
ebi-a-GCST90001582	12	0.029	0.51868	0.31361-0.8579	0.012	0.59598	0.39769-0.89313	0.107	0.77331	0.56572-1.05707	0.358	0.68593	0.31736-1.48251	0.053	0.64582	0.43497-0.95888	0.09756	0.08979	0.159	17.0097	11	0.10759	12.574	10	0.24847	3.56574e-70	0.321317
ebi-a-GCST90001718	12	0.135	0.81173	0.63107-1.0441	0.016	0.85052	0.74588-0.96983	0.107	0.8624	0.72025-1.03262	0.777	1.06066	0.71262-1.57869	0.024	0.84246	0.74096-0.95786	0.05087	0.50408	0.168	25.5821	11	0.00749	24.4098	10	0.00658	0	0.602371
ebi-a-GCST90001797	12	0.067	1.29136	1.01205-1.6477	0.139	1.23273	0.93439-1.62631	0.109	1.18015	0.96387-1.44496	0.044	0.57748	0.36013-0.92601	0.081	1.26335	0.99573-1.60292	-0.04342	0.24382	0.496	11.6342	11	0.39176	10.087	10	0.43289	4.45686e-59	0.194491
ebi-a-GCST90001504	10	0.11	1.58676	0.95983-2.6232	0.753	1.0691	0.70481-1.62168	0.111	1.26665	0.94696-1.69427	0.834	1.07095	0.57523-1.99386	0.951	1.01937	0.56443-1.84100	-0.07682	0.31282	0.439	8.23356	9	0.51079	7.07331	8	0.52874	1.83239e-59	0.382267
ebi-a-GCST90002082	12	0.278	0.89093	0.73130-1.0854	0.261	0.88794	0.72186-1.09225	0.113	0.87995	0.75108-1.03093	0.939	1.01856	0.64240-1.61499	0.198	0.88894	0.75105-1.05215	-0.01158	0.8409	0.879	6.3755	11	0.84717	6.33306	10	0.78655	1.43076e-63	0.126508
ebi-a-GCST90001548	10	0.306	1.26104	0.83207-1.9112	0.551	1.12412	0.76512-1.65156	0.114	1.25234	0.94758-1.65511	0.666	1.15036	0.62196-2.12765	0.416	1.19396	0.79452-1.79421	-0.00245	0.96455	0.505	8.76611	9	0.45914	8.76381	8	0.36261	4.79206e-54	0.324209
ebi-a-GCST90001833	14	0.18	0.79401	0.57801-1.0907	0.363	0.88446	0.67878-1.15246	0.116	0.86293	0.71785-1.03733	0.641	0.90007	0.58419-1.38673	0.43	0.89411	0.68316-1.17018	0.02459	0.54015	0.647	11.4941	13	0.5695	11.0965	12	0.52067	1.38544e-86	0.196703
ebi-a-GCST90001853	13	0.231	0.82867	0.61980-1.1079	0.137	0.85954	0.70402-1.04942	0.117	0.88348	0.75670-1.03149	0.254	0.82152	0.59559-1.13315	0.16	0.84775	0.68285-1.05248	0.02539	0.61946	0.981	4.54263	12	0.97154	4.28152	11	0.96095	1.23929e-221	0.285305
ebi-a-GCST90001623	17	0.41	0.81279	0.50318-1.3129	0.257	0.82367	0.58878-1.15227	0.118	0.83221	0.66103-1.04772	0.332	0.74643	0.42099-1.32347	0.336	0.79322	0.50183-1.25382	0.00571	0.91302	0.49	15.9629	16	0.45556	15.9497	15	0.3854	1.23604e-128	0.306302
ebi-a-GCST90001442	16	0.139	1.10916	0.97456-1.2623	0.238	1.07097	0.95570-1.20014	0.119	1.09089	0.97779-1.21707	0.589	1.13164	0.72982-1.75471	0.218	1.07479	0.96279-1.19982	-0.01856	0.62032	0.406	20.0156	15	0.17134	19.6552	14	0.14139	5.82058e-96	0.106308
ebi-a-GCST90001734	9	0.373	0.79381	0.49358-1.2767	0.074	0.72218	0.50552-1.03168	0.12	0.80413	0.61107-1.05818	0.292	0.69622	0.37091-1.30684	0.07	0.70638	0.50987-0.97861	0.00393	0.94977	0.7	4.39722	8	0.81963	4.39296	7	0.73357	2.47863e-46	0.180529
ebi-a-GCST90001888	12	0.041	0.64876	0.45163-0.9320	0.087	0.81241	0.64026-1.03085	0.122	0.85285	0.69714-1.04335	0.726	0.9271	0.61341-1.40123	0.119	0.79508	0.60957-1.03703	0.09785	0.10517	0.96	4.35847	11	0.95823	1.18476	10	0.99963	8.90841e-128	0.285871
ebi-a-GCST90001928	7	0.293	1.26853	0.85267-1.8872	0.35	1.16034	0.84934-1.58522	0.123	1.21314	0.94892-1.55094	0.363	1.27303	0.78711-2.05893	0.369	1.15732	0.86178-1.55422	-0.02894	0.79048	0.584	4.77035	6	0.57359	4.69178	5	0.45464	4.05345e-38	0.208078
ebi-a-GCST90001616	9	0.272	0.91269	0.78541-1.0606	0.289	0.91672	0.78048-1.07674	0.126	0.90364	0.79357-1.02896	0.577	0.8629	0.52463-1.41928	0.225	0.91502	0.80148-1.04465	-0.01018	0.80296	0.718	5.24884	8	0.73068	5.18167	7	0.6378	4.17107e-46	0.0804186
ebi-a-GCST90001796	6	0.278	0.75034	0.47899-1.1754	0.102	0.76925	0.56169-1.05352	0.127	0.79503	0.59209-1.06753	0.207	1.59672	0.84761-3.00786	0.112	0.746	0.55398-1.00459	0.02908	0.73341	0.294	7.76066	5	0.16993	7.51015	4	0.11126	4.30924e-29	0.140883
ebi-a-GCST90001677	10	0.141	1.5365	0.91832-2.5708	0.146	1.32458	0.90681-1.93481	0.127	1.29103	0.92963-1.79294	0.676	1.14359	0.62141-2.10459	0.135	1.3822	0.93896-2.03466	-0.05662	0.41006	0.188	13.7616	9	0.13106	12.5741	8	0.12737	1.26734e-51	0.421221
ebi-a-GCST90001585	15	0.485	0.8701	0.59527-1.2718	0.454	0.90322	0.69178-1.17928	0.129	0.84785	0.68521-1.04908	0.13	0.63799	0.36910-1.10276	0.463	0.89988	0.68405-1.18381	-0.01037	0.87411	0.788	9.88228	14	0.77074	9.85617	13	0.70565	8.85461e-232	0.397856
ebi-a-GCST90001398	10	0.064	1.57001	1.03929-2.3717	0.244	1.25754	0.85537-1.84879	0.13	1.24696	0.93733-1.65889	0.873	0.94931	0.51147-1.76198	0.199	1.34502	0.88439-2.04556	-0.07197	0.16801	0.503	8.55803	9	0.47903	6.26009	8	0.61812	2.92711e-55	0.300708
ebi-a-GCST90001575	13	0.616	0.88494	0.55602-1.4084	0.917	0.9809	0.68178-1.41125	0.134	0.8299	0.65040-1.05893	0.975	1.00838	0.60406-1.68332	0.945	0.98672	0.67948-1.43289	-0.01821	0.75269	0.393	12.4864	12	0.40745	12.369	11	0.33655	6.15877e-68	0.204089
ebi-a-GCST90001717	11	0.079	0.83415	0.69716-0.9981	0.11	0.89615	0.78329-1.02526	0.134	0.90056	0.78523-1.03283	0.532	1.13869	0.76872-1.68671	0.012	0.81638	0.71750-0.92888	0.07209	0.24252	0.265	15.5757	10	0.11244	13.2689	9	0.15081	0	0.355943
ebi-a-GCST90001740	14	0.199	1.54145	0.82571-2.8776	0.015	1.56271	1.09006-2.24028	0.135	1.24341	0.93455-1.65435	0.133	1.5994	0.90069-2.84016	0.043	1.5994	1.06216-2.40839	-0.0507	0.46076	0.221	17.149	13	0.19258	16.3574	12	0.17541	1.22481e-75	0.380366
ebi-a-GCST90001553	18	0.604	1.05304	0.86936-1.2755	0.113	1.22475	0.95291-1.57415	0.135	1.13271	0.96201-1.33370	0.806	1.0624	0.66021-1.70959	0.313	1.12461	0.90111-1.40353	0.0387	0.17336	0.469	16.9119	17	0.46035	14.8811	16	0.53337	6.81115e-101	0.185548
ebi-a-GCST90001891	6	0.843	0.94634	0.56661-1.5805	0.321	0.84879	0.61411-1.17315	0.136	0.81509	0.62292-1.06653	0.79	0.93974	0.60957-1.44874	0.351	0.85621	0.63678-1.15125	-0.05248	0.53957	0.817	2.73876	5	0.74018	2.28991	4	0.68261	5.23117e-72	0.270026
ebi-a-GCST90001560	12	0.079	1.08614	0.99971-1.1800	0.201	1.06903	0.96496-1.18431	0.139	1.0591	0.98158-1.14273	0.458	0.89246	0.66782-1.19267	0.163	1.06707	0.98006-1.16181	-0.04812	0.16662	0.617	8.02415	11	0.71114	5.79881	10	0.83187	3.98552e-69	0.0681227
ebi-a-GCST90001503	18	0.102	0.93763	0.87180-1.0084	0.148	0.93534	0.85442-1.02391	0.139	0.95401	0.89636-1.01538	0.828	0.98036	0.82231-1.16880	0.07	0.93559	0.87462-1.00081	0.02841	0.38002	0.584	15.6088	17	0.55172	14.7937	16	0.5398	3.18713e-148	0.0720234
ebi-a-GCST90001588	13	0.442	1.18574	0.78000-1.8025	0.174	1.23783	0.90998-1.68381	0.139	1.20147	0.94221-1.53207	0.24	1.30005	0.85767-1.97058	0.171	1.2548	0.92414-1.70378	0.00344	0.93961	0.284	15.5692	12	0.21177	15.5607	11	0.15824	3.43258e-83	0.298918
ebi-a-GCST90001543	13	0.236	0.87717	0.71459-1.0767	0.053	0.83005	0.68748-1.00219	0.139	0.89144	0.76547-1.03814	0.717	0.93545	0.65733-1.33124	0.045	0.82076	0.69028-0.97592	0.01004	0.81185	0.362	13.4842	12	0.33485	13.4117	11	0.26727	1.4429e-74	0.117153
ebi-a-GCST90001405	10	0.116	0.84401	0.69884-1.0193	0.201	0.89464	0.75420-1.06124	0.14	0.89046	0.76334-1.03874	0.807	1.0436	0.74832-1.45538	0.254	0.90463	0.77007-1.06270	0.04946	0.36085	0.421	11.4809	9	0.24418	10.2746	8	0.24628	2.79206e-49	0.0928843
ebi-a-GCST90001521	13	0.187	0.86213	0.70129-1.0599	0.452	0.92589	0.75766-1.13149	0.14	0.89783	0.77808-1.03602	0.891	1.0221	0.75343-1.38659	0.401	0.9187	0.75904-1.11195	0.02217	0.59335	0.501	11.9817	12	0.44715	11.6611	11	0.38965	4.85055e-75	0.153978
ebi-a-GCST90001447	10	0.264	1.18129	0.89990-1.5507	0.139	1.23253	0.93459-1.62544	0.146	1.17473	0.94571-1.45920	0.902	0.96417	0.54789-1.69672	0.134	1.23383	0.96056-1.58485	-0.00358	0.94864	0.913	3.44453	9	0.94404	3.44011	8	0.90379	3.90569e-53	0.167914
ebi-a-GCST90001602	12	0.232	1.2252	0.89600-1.6754	0.147	1.24086	0.92690-1.66116	0.146	1.17961	0.94415-1.47379	0.104	1.57559	0.95293-2.60511	0.202	1.21836	0.91600-1.62054	-0.01307	0.74235	0.733	9.02466	11	0.61962	8.91041	10	0.54063	3.48659e-62	0.197199
ebi-a-GCST90001715	11	0.081	0.82793	0.68601-0.9992	0.127	0.89936	0.78486-1.03057	0.147	0.90325	0.78718-1.03642	0.46	1.16147	0.79307-1.70100	0.016	0.81649	0.71187-0.93650	0.08608	0.23052	0.253	15.7998	10	0.10551	13.347	9	0.14752	0	0.34054
ebi-a-GCST90001485	23	0.249	0.9339	0.83408-1.0457	0.116	0.9046	0.79839-1.02495	0.147	0.94273	0.87049-1.02096	0.588	0.93733	0.74400-1.18089	0.457	0.95494	0.84747-1.07603	0.00773	0.81766	0.332	21.6817	22	0.47902	21.6255	21	0.42136	0	0.188629
ebi-a-GCST90001619	17	0.625	1.03709	0.89900-1.1964	0.343	1.07485	0.92591-1.24775	0.147	1.08078	0.97296-1.20054	0.235	1.156	0.91828-1.45526	0.322	1.0707	0.93923-1.22058	0.02762	0.41674	0.74	12.2393	16	0.72735	11.5418	15	0.71332	4.49592e-172	0.125883
ebi-a-GCST90001708	18	0.079	0.84033	0.70050-1.0081	0.056	0.87236	0.75819-1.00373	0.15	0.9096	0.79959-1.03476	0.784	1.05052	0.74265-1.48602	0.023	0.84455	0.73953-0.96448	0.06229	0.2499	0.1	27.2416	17	0.05462	25.013	16	0.0696	0	0.336236
ebi-a-GCST90001998	17	0.154	1.13922	0.96090-1.3506	0.443	1.07277	0.89653-1.28367	0.15	1.1004	0.96602-1.25348	0.479	1.09142	0.86130-1.38301	0.267	1.09954	0.93527-1.29266	-0.01897	0.54462	0.781	12.3914	16	0.71663	12.0071	15	0.67849	7.03412e-90	0.114879
ebi-a-GCST90001911	18	0.183	0.85026	0.67682-1.0682	0.213	0.86308	0.68451-1.08824	0.151	0.88968	0.75841-1.04367	0.77	0.94802	0.66689-1.34767	0.17	0.85537	0.69093-1.05896	0.01851	0.5857	0.455	18.1743	17	0.37792	17.8295	16	0.33398	2.39232e-109	0.15919
ebi-a-GCST90001443	7	0.145	1.15859	0.98012-1.3696	0.119	1.11836	0.97148-1.28744	0.152	1.09867	0.96600-1.24956	0.621	1.1082	0.75276-1.63148	0.155	1.12374	0.97650-1.29317	-0.05557	0.37482	0.577	3.60628	6	0.72978	2.65772	5	0.75258	1.58325e-35	0.0744678
ebi-a-GCST90001857	14	0.077	0.76946	0.59018-1.0032	0.146	0.86356	0.70847-1.05259	0.153	0.89403	0.76684-1.04233	0.408	0.8683	0.62800-1.20055	0.156	0.85188	0.69148-1.04948	0.05719	0.19905	0.84	8.81399	13	0.78684	6.96631	12	0.85983	6.17736e-234	0.253558
ebi-a-GCST90001966	10	0.31	0.73106	0.41489-1.2882	0.146	0.76278	0.52959-1.09866	0.154	0.81334	0.61214-1.08068	0.249	0.72733	0.43851-1.20639	0.165	0.72421	0.47672-1.10016	0.02942	0.68094	0.689	6.60694	9	0.67797	6.42498	8	0.59974	1.38343e-86	0.3235
ebi-a-GCST90001615	12	0.226	0.79199	0.55552-1.1291	0.204	0.83316	0.62860-1.10427	0.156	0.85203	0.68275-1.06328	0.836	0.94461	0.55695-1.60211	0.351	0.86883	0.65463-1.15313	0.02565	0.6083	0.501	11.6426	11	0.3911	11.3256	10	0.33272	3.51388e-60	0.146769
ebi-a-GCST90001691	16	0.378	1.03823	0.95767-1.1256	0.286	1.0492	0.96060-1.14598	0.157	1.05303	0.98033-1.13112	0.662	0.94256	0.72703-1.22198	0.251	1.04809	0.97025-1.13219	0.02228	0.47184	0.921	9.80441	15	0.83186	9.2576	14	0.8142	3.06887e-105	0.0714045
ebi-a-GCST90001935	8	0.788	0.86776	0.32235-2.3360	0.211	0.7603	0.49465-1.16861	0.157	0.78337	0.55867-1.09845	0.462	0.80336	0.46286-1.39434	0.258	0.75331	0.47966-1.18307	-0.02347	0.83656	0.984	1.44718	7	0.98408	1.40076	6	0.96581	5.96505e-47	0.220873
ebi-a-GCST90001913	7	0.084	0.4782	0.24423-0.9363	0.379	0.83062	0.54929-1.25604	0.157	0.80578	0.59732-1.08698	0.61	0.85723	0.48907-1.50254	0.615	0.85152	0.47037-1.54153	0.11882	0.14985	0.409	5.50545	6	0.4808	2.615	5	0.75908	3.20106e-38	0.173542
ebi-a-GCST90001407	9	0.194	1.10234	0.96508-1.2591	0.162	1.08632	0.96736-1.21990	0.159	1.08233	0.96941-1.20841	0.131	1.4096	0.94540-2.10172	0.189	1.08258	0.97145-1.20643	-0.02987	0.60395	0.58	9.95571	8	0.26815	9.55325	7	0.21533	1.68536e-49	0.0740229
ebi-a-GCST90001570	17	0.122	1.26703	0.95461-1.6817	0.607	1.07377	0.81889-1.40798	0.159	1.13802	0.95047-1.36258	0.993	0.99802	0.65473-1.52129	0.359	1.17298	0.84262-1.63284	-0.0331	0.35063	0.742	12.0496	16	0.74056	11.1214	15	0.74394	2.09149e-107	0.204857
ebi-a-GCST90001909	5	0.711	0.82224	0.32021-2.1113	0.24	0.71274	0.40500-1.25431	0.16	0.72192	0.45802-1.13786	0.416	0.72344	0.35911-1.45742	0.347	0.72344	0.39888-1.31210	-0.03495	0.77772	0.983	0.39438	4	0.98293	0.29906	3	0.9602	2.43856e-28	0.235793
ebi-a-GCST90001836	12	0.625	0.94821	0.77097-1.1662	0.255	0.89403	0.73733-1.08403	0.164	0.90334	0.78295-1.04223	0.057	0.64935	0.43572-0.96772	0.23	0.89465	0.75349-1.06224	-0.02881	0.52921	0.559	10.9898	11	0.44412	10.5419	10	0.3943	1.52402e-66	0.152495
ebi-a-GCST90002031	16	0.12	0.9033	0.80085-1.0189	0.126	0.91859	0.82392-1.02415	0.165	0.94166	0.86508-1.02502	0.907	1.01297	0.81863-1.25346	0.107	0.92066	0.83758-1.01197	0.03072	0.35607	0.574	14.4534	15	0.49146	13.5425	14	0.48432	0	0.187208
ebi-a-GCST90001412	14	0.066	1.57118	1.01326-2.4363	0.192	1.30458	0.87466-1.94580	0.165	1.22637	0.91924-1.63613	0.751	1.11295	0.58273-2.12558	0.192	1.35605	0.87836-2.09353	-0.06679	0.17851	0.338	14.6785	13	0.32785	12.5439	12	0.40305	1.88622e-81	0.356074
ebi-a-GCST90001448	6	0.469	1.17083	0.79529-1.7237	0.282	1.19333	0.86481-1.64666	0.167	1.2077	0.92434-1.57793	0.328	1.33441	0.79196-2.24839	0.318	1.20174	0.86811-1.66359	0.01482	0.83851	0.828	2.91916	5	0.71245	2.87188	4	0.57949	5.46849e-31	0.166595
ebi-a-GCST90001924	11	0.015	1.55421	1.16589-2.0719	0.161	1.22086	0.92338-1.61418	0.167	1.16336	0.93865-1.44186	0.901	1.03322	0.62687-1.70299	0.135	1.32697	0.94394-1.86543	-0.11086	0.02839	0.194	13.0723	10	0.21966	6.27373	9	0.71224	2.79888e-62	0.201344
ebi-a-GCST90002005	15	0.975	0.99611	0.78364-1.2662	0.927	1.00986	0.81913-1.24499	0.168	1.1137	0.95559-1.29798	0.288	1.2055	0.86523-1.67959	0.918	1.0101	0.83686-1.21922	0.05842	0.25755	0.679	9.86168	14	0.77222	8.45945	13	0.81243	0	0.329034
ebi-a-GCST90001849	16	0.14	0.75332	0.52812-1.0746	0.052	0.79325	0.62778-1.00233	0.168	0.8693	0.71225-1.06099	0.352	0.85423	0.61949-1.17794	0.067	0.79831	0.63809-0.99875	0.043	0.35534	0.172	21.864	15	0.11142	20.5245	14	0.11445	9.67566e-147	0.25474
ebi-a-GCST90002043	7	0.523	0.91679	0.71527-1.1751	0.305	0.88838	0.70854-1.11385	0.171	0.88407	0.74103-1.05473	0.66	1.09697	0.74126-1.62336	0.267	0.86462	0.68502-1.09132	-0.01796	0.70008	0.721	4.06828	6	0.66744	3.90173	5	0.56365	6.53385e-38	0.130692
ebi-a-GCST90002025	7	0.493	1.34196	0.61482-2.9291	0.538	0.89679	0.63415-1.26819	0.174	0.82169	0.61907-1.09062	0.425	0.81217	0.50411-1.30850	0.551	0.89784	0.64279-1.25409	-0.10772	0.2435	0.629	4.48673	6	0.61111	2.73974	5	0.74003	1.67825e-61	0.226696
ebi-a-GCST90001996	18	0.527	0.93668	0.76809-1.1423	0.451	0.93414	0.78242-1.11527	0.175	0.91261	0.79973-1.04144	0.785	0.9611	0.72608-1.27221	0.573	0.95367	0.81117-1.12120	-0.01281	0.73502	0.645	15.3276	17	0.5719	15.2089	16	0.50939	3.74044e-169	0.13846
ebi-a-GCST90001415	8	0.422	1.58096	0.55706-4.4868	0.131	1.41305	0.90163-2.21454	0.175	1.3576	0.87258-2.11223	0.775	0.88308	0.38915-2.00394	0.183	1.41522	0.89248-2.24415	-0.03777	0.75898	0.139	13.4384	7	0.06212	13.2113	6	0.0398	8.79559e-42	0.446902
ebi-a-GCST90001440	10	0.103	1.78268	0.96313-3.2996	0.214	1.27467	0.86945-1.86875	0.184	1.22078	0.90943-1.63873	0.424	1.27318	0.72372-2.23978	0.355	1.27318	0.78343-2.06907	-0.08199	0.20717	0.713	6.73251	9	0.66495	4.84891	8	0.7736	1.17379e-49	0.22933
ebi-a-GCST90001787	12	0.087	0.85458	0.72665-1.0050	0.229	0.9025	0.76346-1.06688	0.185	0.91712	0.80711-1.04214	0.492	0.90846	0.69698-1.18410	0.11	0.87785	0.75782-1.01689	0.04839	0.19568	0.697	8.59456	11	0.65926	6.67173	10	0.75603	1.05703e-103	0.0994252
ebi-a-GCST90002110	14	0.382	1.07066	0.92379-1.2409	0.83	0.98417	0.85110-1.13805	0.185	0.92241	0.81848-1.03953	0.306	0.8757	0.68591-1.11800	0.943	0.99495	0.86803-1.14044	-0.09873	0.01402	0.225	16.2567	13	0.23555	8.00534	12	0.78471	1.95092e-113	0.14521
ebi-a-GCST90001904	9	0.301	1.32599	0.80797-2.1761	0.4	1.15615	0.82486-1.62048	0.187	1.1977	0.91626-1.56558	0.47	1.20344	0.74546-1.94278	0.386	1.23358	0.78762-1.93203	-0.03309	0.64681	0.853	3.95119	8	0.8615	3.72213	7	0.81117	9.2285e-50	0.229098
ebi-a-GCST90001968	6	0.399	0.70037	0.33433-1.4671	0.321	0.79256	0.50083-1.25421	0.188	0.78585	0.54908-1.12474	0.463	0.79472	0.45086-1.40083	0.401	0.79819	0.49303-1.29222	0.02992	0.74468	0.996	0.36575	5	0.99622	0.24394	4	0.99314	6.67844e-30	0.164895
ebi-a-GCST90001786	13	0.148	1.44551	0.90855-2.2998	0.455	1.13948	0.80882-1.60532	0.189	1.17497	0.92355-1.49482	0.754	0.91486	0.53077-1.57691	0.479	1.15961	0.77936-1.72539	-0.05149	0.32834	0.612	10.0722	12	0.60963	9.0259	11	0.6195	5.75851e-88	0.24598
ebi-a-GCST90001784	16	0.849	1.01683	0.85926-1.2033	0.677	1.03987	0.86505-1.25003	0.19	1.09173	0.95734-1.24499	0.849	1.02707	0.78343-1.34649	0.69	1.03389	0.88040-1.21413	0.04794	0.20718	0.864	10.2089	15	0.80639	8.45977	14	0.86403	5.28454e-131	0.12571
ebi-a-GCST90001702	14	0.141	0.83823	0.67303-1.0440	0.134	0.90009	0.78438-1.03287	0.194	0.89934	0.76632-1.05546	0.399	1.15882	0.83216-1.61370	0.022	0.83131	0.72285-0.95605	0.06346	0.37356	0.121	28.3937	13	0.00797	26.5067	12	0.00909	0	0.378861
ebi-a-GCST90002078	12	0.262	0.82001	0.59115-1.1375	0.143	0.81749	0.62434-1.07039	0.194	0.87979	0.72519-1.06735	0.984	0.99607	0.68489-1.44863	0.191	0.81248	0.60689-1.08773	0.02708	0.61287	0.839	6.24541	11	0.8565	5.97266	10	0.81755	8.36992e-104	0.172443
ebi-a-GCST90001608	14	0.345	1.36892	0.73154-2.5616	0.351	1.17033	0.84088-1.62885	0.194	1.18128	0.91851-1.51923	0.627	1.13049	0.69762-1.83195	0.425	1.15839	0.81660-1.64324	-0.03556	0.62375	0.851	8.75713	13	0.79103	8.50364	12	0.74464	1.49029e-92	0.269448
ebi-a-GCST90001580	10	0.944	1.01066	0.75732-1.3487	0.67	0.94651	0.73535-1.21831	0.197	0.87554	0.71535-1.07159	0.193	0.72925	0.46955-1.13259	0.693	0.95112	0.74723-1.21065	-0.06092	0.20929	0.909	3.62484	9	0.93433	1.76055	8	0.98749	2.00837e-173	0.23228
ebi-a-GCST90001509	15	0.155	0.89419	0.77325-1.0340	0.529	0.95018	0.81046-1.11399	0.197	0.92961	0.83194-1.03874	0.388	0.90214	0.71937-1.13135	0.161	0.90214	0.78712-1.03397	0.03651	0.43148	0.593	13.3962	14	0.49559	12.7371	13	0.46832	1.64737e-107	0.0889797
ebi-a-GCST90001645	13	0.183	1.4019	0.87957-2.2344	0.18	1.24652	0.90340-1.71995	0.198	1.18016	0.91731-1.51832	0.254	1.27046	0.85910-1.87880	0.235	1.27046	0.87329-1.84828	-0.04129	0.40789	0.91	6.80024	12	0.87053	6.05981	11	0.86934	1.59363e-83	0.246835
ebi-a-GCST90001879	9	0.732	0.77623	0.19231-3.1330	0.23	1.17845	0.90133-1.54077	0.198	1.14573	0.93157-1.40914	0.26	1.30512	0.84884-2.00668	0.257	1.30169	0.85215-1.98838	0.09041	0.59744	0.873	3.70005	8	0.88312	3.39418	7	0.8463	6.91256e-55	0.277183
ebi-a-GCST90001940	8	0.909	0.98516	0.77120-1.2585	0.389	0.90379	0.71811-1.13747	0.198	0.88183	0.72805-1.06810	0.442	0.81799	0.50453-1.32618	0.426	0.91024	0.73197-1.13194	-0.05751	0.20408	0.566	6.66093	7	0.46502	4.63077	6	0.59196	2.0974e-44	0.0972921
ebi-a-GCST90001410	8	0.576	1.27907	0.56602-2.8904	0.353	1.2265	0.79744-1.88642	0.199	1.2525	0.88846-1.76571	0.252	1.52363	0.78666-2.95103	0.636	1.17097	0.62694-2.18712	-0.00384	0.95744	0.904	2.82685	7	0.90054	2.82376	6	0.83062	3.25593e-44	0.257318
ebi-a-GCST90001892	10	0.143	0.81004	0.62804-1.0448	0.107	0.85152	0.70025-1.03546	0.2	0.90081	0.76792-1.05670	0.553	1.11211	0.79327-1.55911	0.132	0.85087	0.70282-1.03009	0.04985	0.32429	0.725	6.41344	9	0.69793	5.31043	8	0.72394	1.80504e-200	0.206504
ebi-a-GCST90001972	12	0.376	1.08929	0.90918-1.3051	0.056	1.20375	0.99547-1.45561	0.203	1.09694	0.95116-1.26506	0.28	1.22145	0.86478-1.72522	0.237	1.12187	0.93699-1.34324	0.00556	0.89535	0.367	12.1947	11	0.34919	12.1725	10	0.27368	6.02596e-61	0.0977776
ebi-a-GCST90001864	17	0.26	0.84533	0.63793-1.1201	0.145	0.86561	0.71294-1.05098	0.204	0.90943	0.78555-1.05284	0.498	0.90396	0.67972-1.20217	0.209	0.87385	0.71423-1.06913	0.02614	0.56012	0.996	5.64049	16	0.99153	5.28539	15	0.98942	7.14197e-258	0.209339
ebi-a-GCST90001867	13	0.399	0.78313	0.45346-1.3525	0.844	0.96702	0.69211-1.35112	0.205	0.85498	0.67116-1.08915	0.883	1.04414	0.59374-1.83620	0.748	0.93849	0.64295-1.36990	0.02838	0.73205	0.625	9.93464	12	0.62169	9.81128	11	0.54744	5.86755e-80	0.199996
ebi-a-GCST90001595	4	0.932	0.93642	0.24802-3.5355	0.254	1.47397	0.75652-2.87183	0.205	1.42552	0.82428-2.46531	0.266	1.82275	0.76908-4.32003	0.728	1.15085	0.55919-2.36855	0.08099	0.56641	0.837	0.58282	3	0.90035	0.11976	2	0.94188	1.32506e-20	0.316922
ebi-a-GCST90001684	4	0.301	4.8751	0.51570-46.0863	0.274	1.34165	0.79259-2.27107	0.207	1.31385	0.85962-2.00809	0.306	1.56702	0.76702-3.20139	0.264	1.55534	0.82676-2.92600	-0.2153	0.36418	0.731	1.36581	3	0.71357	0.0086	2	0.99571	8.0479e-25	0.241834
ebi-a-GCST90001455	5	0.758	0.75638	0.14901-3.8394	0.379	1.30677	0.71965-2.37287	0.208	1.39806	0.82969-2.35577	0.895	0.93554	0.37015-2.36450	0.436	1.31229	0.70891-2.42925	0.12175	0.48853	0.308	6.01339	4	0.19815	4.98351	3	0.17301	2.39493e-25	0.401826
ebi-a-GCST90001495	13	0.875	0.98516	0.82068-1.1826	0.196	0.92349	0.81851-1.04192	0.209	0.93346	0.83846-1.03922	0.791	0.96495	0.74553-1.24894	0.337	0.94125	0.83597-1.05980	-0.03113	0.48964	0.648	10.8793	12	0.53929	10.3683	11	0.49759	0	0.201489
ebi-a-GCST90001922	9	0.215	0.492	0.17735-1.3649	0.761	0.92802	0.57353-1.50162	0.212	0.79197	0.54915-1.14215	0.608	1.2512	0.54965-2.84817	0.618	1.23376	0.55766-2.72959	0.0935	0.35971	0.179	11.0256	8	0.20025	9.69523	7	0.20651	6.05907e-46	0.233806
ebi-a-GCST90002045	9	0.117	0.69431	0.46546-1.0357	0.072	0.76204	0.56696-1.02425	0.216	0.87075	0.69935-1.08416	0.643	0.89447	0.56781-1.40905	0.134	0.75662	0.54492-1.05055	0.08991	0.23298	0.374	8.66687	8	0.37117	6.96247	7	0.4328	5.17439e-59	0.200591
ebi-a-GCST90001830	8	0.358	0.61757	0.23914-1.5948	0.117	0.6857	0.42806-1.09842	0.22	0.75622	0.48364-1.18244	0.765	0.87943	0.39045-1.98082	0.068	0.61183	0.39145-0.95625	0.06065	0.64625	0.162	12.2168	7	0.09365	11.7597	6	0.06755	4.42578e-61	0.321503
ebi-a-GCST90001557	6	0.344	0.25917	0.02190-3.0665	0.343	0.75386	0.42030-1.35214	0.221	0.7601	0.48983-1.17949	0.515	0.71261	0.27577-1.84142	0.463	0.68135	0.26422-1.75700	0.24059	0.43468	0.519	3.9173	5	0.56138	3.16499	4	0.5306	1.7974e-34	0.20672
ebi-a-GCST90001745	16	0.674	1.08897	0.73769-1.6075	0.182	0.81431	0.60238-1.10082	0.224	0.86455	0.68389-1.09292	0.55	0.8466	0.49639-1.44389	0.405	0.88002	0.65691-1.17889	-0.07835	0.17515	0.13	21.9704	15	0.10858	19.1763	14	0.15832	4.05615e-113	0.199081
ebi-a-GCST90001430	19	0.51	0.95636	0.83990-1.0890	0.505	0.9555	0.83586-1.09227	0.226	0.93274	0.83323-1.04413	0.878	0.96445	0.61048-1.52366	0.453	0.9563	0.85310-1.07198	-0.02049	0.44094	0.543	18.4888	18	0.42391	17.8356	17	0.39928	6.74826e-101	0.0818644
ebi-a-GCST90001801	14	0.838	0.97609	0.77755-1.2253	0.493	0.94424	0.80154-1.11236	0.227	0.92574	0.81673-1.04929	0.284	0.88574	0.71580-1.09603	0.405	0.93403	0.79964-1.09101	-0.03144	0.59445	0.677	11.6428	13	0.55713	11.3437	12	0.49972	4.98437e-222	0.184241
ebi-a-GCST90001467	17	0.748	0.92624	0.58489-1.4668	0.421	0.86892	0.61694-1.22381	0.228	0.86539	0.68396-1.09495	0.475	0.82705	0.49733-1.37538	0.422	0.86099	0.60302-1.22930	-0.0155	0.73798	0.519	16.0863	16	0.44695	15.9627	15	0.38453	2.49626e-106	0.197096
ebi-a-GCST90001943	10	0.214	1.1599	0.93502-1.4389	0.239	1.13068	0.92168-1.38708	0.229	1.10009	0.94183-1.28494	0.447	0.84614	0.56051-1.27732	0.136	1.17743	0.96811-1.43199	-0.03879	0.50699	0.64	6.20311	9	0.71943	5.72069	8	0.67849	2.44497e-53	0.0903437
ebi-a-GCST90001470	13	0.28	1.28305	0.83504-1.9714	0.136	1.2318	0.93666-1.61993	0.229	1.17772	0.90231-1.53718	0.272	1.25927	0.85054-1.86440	0.146	1.21756	0.94965-1.56103	-0.0295	0.62089	0.062	22.9499	12	0.02815	22.4221	11	0.0213	5.57188e-93	0.282153
ebi-a-GCST90001688	66	0.651	1.00537	0.98240-1.0289	0.793	1.00367	0.97659-1.03151	0.229	1.01129	0.99296-1.02996	0.896	1.00277	0.96212-1.04513	0.862	0.99724	0.96670-1.02875	0.02122	0.41825	0.539	63.9199	65	0.51462	63.2562	64	0.50278	0	0.053879
ebi-a-GCST90002009	11	0.961	1.01369	0.59979-1.7132	0.064	1.36005	0.98277-1.88216	0.229	1.15927	0.91115-1.47495	0.147	1.48952	0.90661-2.44721	0.142	1.37266	0.92955-2.02701	0.03509	0.58284	0.414	10.2184	10	0.42155	9.86274	9	0.36171	3.8134e-126	0.277383
ebi-a-GCST90001768	14	0.061	0.75711	0.58131-0.9861	0.058	0.81391	0.65778-1.00710	0.23	0.88513	0.72538-1.08007	0.645	0.86836	0.48330-1.56021	0.05	0.8123	0.67253-0.98112	0.07409	0.12648	0.158	20.6752	13	0.07961	16.8814	12	0.15411	2.3096e-85	0.131521
ebi-a-GCST90001441	9	0.361	1.96338	0.50723-7.5998	0.3	0.74889	0.43361-1.29342	0.23	0.77671	0.51399-1.17372	0.412	0.70662	0.32203-1.55049	0.406	0.70662	0.32539-1.53450	-0.15438	0.20135	0.783	4.81848	8	0.77679	2.82995	7	0.90028	4.40688e-45	0.215902
ebi-a-GCST90001695	256	0.432	1.00005	0.99992-1.0002	0.873	0.99999	0.99984-1.00014	0.23	1.00005	0.99997-1.00014	0.899	0.99998	0.99973-1.00024	0.314	1.00008	0.99993-1.00023	0.00114	0.94943	0.52	254.1	255	0.50414	254.096	254	0.4865	NA	0.0500004
ebi-a-GCST90001697	121	0.624	1.00083	0.99753-1.0041	0.593	1.00105	0.99721-1.00490	0.232	1.00145	0.99907-1.00384	0.489	0.99773	0.99135-1.00415	0.648	1.00078	0.99745-1.00412	0.01323	0.59318	0.73	110.007	120	0.73254	109.72	119	0.71715	NA	0.0501235
ebi-a-GCST90001413	11	0.332	1.14447	0.88426-1.4813	0.152	1.16944	0.94400-1.44872	0.233	1.12297	0.92828-1.35850	0.826	1.03682	0.75714-1.41982	0.131	1.1862	0.96783-1.45384	-0.01942	0.82444	0.198	14.9668	10	0.13328	14.8805	9	0.09427	4.52336e-56	0.111914
ebi-a-GCST90001770	4	0.486	0.53894	0.12878-2.2555	0.38	1.34509	0.69435-2.60570	0.233	1.46859	0.78053-2.76320	0.865	0.88752	0.25174-3.12896	0.261	2.20202	0.71845-6.74909	0.18996	0.27708	0.291	4.70608	3	0.19463	2.24659	2	0.32521	1.27835e-21	0.39741
ebi-a-GCST90001406	19	0.811	1.02966	0.81305-1.3040	0.428	1.09434	0.87562-1.36768	0.239	1.09781	0.93984-1.28232	0.508	1.12378	0.80125-1.57614	0.402	1.10949	0.87503-1.40678	0.02454	0.48972	0.715	15.1531	18	0.65143	14.6546	17	0.62035	2.42162e-110	0.124043
ebi-a-GCST90001527	13	0.489	0.9164	0.72173-1.1636	0.111	0.85345	0.70230-1.03713	0.242	0.90319	0.76150-1.07124	0.731	0.94467	0.68781-1.29746	0.114	0.85498	0.71390-1.02392	-0.00743	0.86137	0.271	16.5997	12	0.16529	16.5516	11	0.12186	4.46438e-88	0.158042
ebi-a-GCST90001759	15	0.53	0.95922	0.84522-1.0886	0.702	0.97866	0.87643-1.09281	0.243	0.93977	0.84666-1.04313	0.391	0.86678	0.63171-1.18931	0.502	0.96434	0.86974-1.06923	-0.01776	0.56369	0.313	20.0262	14	0.12932	19.4996	13	0.10841	1.66005e-94	0.0740067
ebi-a-GCST90001976	4	0.248	6.40886	0.67192-61.1288	0.532	1.23915	0.63200-2.42956	0.244	1.38345	0.80178-2.38713	0.75	1.17641	0.47258-2.92843	0.737	1.16561	0.51535-2.63635	-0.32505	0.30339	0.562	2.23764	3	0.52457	0.35214	2	0.83856	1.61311e-23	0.342796
ebi-a-GCST90002071	10	0.304	1.05416	0.95951-1.1582	0.314	1.04927	0.95559-1.15213	0.244	1.0477	0.96873-1.13310	0.706	1.05805	0.79639-1.40569	0.252	1.052	0.97000-1.14093	-0.01049	0.82271	0.94	3.385	9	0.94706	3.33138	8	0.91187	2.65207e-70	0.0637935
ebi-a-GCST90001673	8	0.297	1.13016	0.91587-1.3946	0.295	1.11454	0.90989-1.36522	0.246	1.10472	0.93364-1.30715	0.788	0.93404	0.57931-1.50596	0.296	1.11628	0.92236-1.35097	-0.01867	0.73549	0.885	3.29881	7	0.85605	3.17353	6	0.78677	8.64145e-41	0.0863325
ebi-a-GCST90002062	10	0.115	1.78355	0.93923-3.3868	0.32	1.18077	0.85112-1.63809	0.248	1.16702	0.89784-1.51690	0.547	1.1602	0.72848-1.84776	0.526	1.1602	0.74618-1.80393	-0.10437	0.19324	0.801	5.67613	9	0.77184	3.65828	8	0.88656	2.32356e-60	0.201466
ebi-a-GCST90002023	7	0.869	1.09641	0.38629-3.1119	0.462	0.86922	0.59852-1.26233	0.251	0.83619	0.61626-1.13460	0.311	0.77073	0.48595-1.22240	0.593	0.89659	0.61365-1.30998	-0.05875	0.61728	0.992	0.54122	6	0.9973	0.25783	5	0.99836	2.65269e-54	0.179711
ebi-a-GCST90001844	12	0.074	1.35894	1.00541-1.8368	0.227	1.17392	0.90520-1.52240	0.251	1.13545	0.91393-1.41067	0.351	0.73771	0.39981-1.36119	0.074	1.30247	1.00160-1.69373	-0.072	0.14407	0.115	17.0243	11	0.10716	13.6065	10	0.19171	4.31079e-81	0.183898
ebi-a-GCST90002053	10	0.023	1.4137	1.10899-1.8021	0.095	1.24002	0.96359-1.59574	0.252	1.1243	0.91991-1.37410	0.942	0.97945	0.57020-1.68243	0.099	1.25646	0.98484-1.60299	-0.12231	0.03068	0.222	12.2583	9	0.19913	5.39768	8	0.71435	1.30878e-54	0.1838
ebi-a-GCST90002072	12	0.156	1.25497	0.93857-1.6780	0.261	1.17641	0.88604-1.56195	0.255	1.11455	0.92476-1.34329	0.988	1.00356	0.64192-1.56892	0.211	1.16885	0.92857-1.47130	-0.04859	0.32106	0.471	11.0244	11	0.44122	9.93443	10	0.44626	3.23721e-71	0.134013
ebi-a-GCST90001394	15	0.366	0.93286	0.80665-1.0788	0.169	0.9216	0.82042-1.03525	0.257	0.93154	0.82405-1.05306	0.424	1.19705	0.78006-1.83693	0.153	0.9258	0.83766-1.02321	-0.00161	0.96918	0.335	24.1199	14	0.04432	24.117	13	0.03007	2.57725e-76	0.0755872
ebi-a-GCST90002085	13	0.18	0.77559	0.54774-1.0982	0.475	0.89427	0.65794-1.21548	0.257	0.88404	0.71432-1.09409	0.662	0.89392	0.54711-1.46057	0.46	0.89392	0.67016-1.19240	0.04196	0.3707	0.75	9.24638	12	0.68175	8.37533	11	0.67934	3.52284e-68	0.127729
ebi-a-GCST90001539	10	0.513	1.46899	0.48871-4.4155	0.193	1.34016	0.86261-2.08208	0.259	1.21436	0.86675-1.70138	0.252	1.52812	0.77453-3.01495	0.258	1.47234	0.78583-2.75861	-0.0327	0.73094	0.926	3.79482	9	0.92439	3.66798	8	0.88577	1.14926e-53	0.242142
ebi-a-GCST90001668	16	0.913	0.99257	0.87036-1.1319	0.444	0.94239	0.80961-1.09694	0.26	0.93958	0.84312-1.04708	0.504	0.92194	0.73064-1.16334	0.405	0.94337	0.82567-1.07785	-0.05545	0.19271	0.316	17.696	15	0.27898	15.6081	14	0.33789	4.7805e-102	0.0773304
ebi-a-GCST90001882	10	0.876	0.98693	0.84098-1.1582	0.511	0.9602	0.85076-1.08372	0.261	0.94519	0.85671-1.04281	0.842	0.97376	0.75532-1.25537	0.503	0.96308	0.86648-1.07044	-0.02752	0.52131	0.843	5.39882	9	0.79825	4.949	8	0.76301	1.01639e-68	0.0877319
ebi-a-GCST90001408	19	0.884	0.98148	0.76721-1.2556	0.442	0.9123	0.72197-1.15281	0.263	0.91143	0.77471-1.07226	0.845	0.95826	0.62933-1.45913	0.356	0.89954	0.72257-1.11987	-0.02806	0.44	0.413	19.8938	18	0.33883	19.188	17	0.31785	4.35539e-106	0.108573
ebi-a-GCST90001926	17	0.019	0.70302	0.54123-0.9132	0.193	0.84157	0.64906-1.09118	0.265	0.89059	0.72655-1.09166	0.138	0.64589	0.37308-1.11819	0.109	0.78199	0.58866-1.03882	0.10377	0.02856	0.153	21.2975	16	0.16736	15.3095	15	0.42936	2.0089e-134	0.187168
ebi-a-GCST90001562	18	0.551	1.02383	0.94903-1.1045	0.639	1.01852	0.94326-1.09977	0.266	1.03895	0.97126-1.11136	0.565	1.05365	0.88500-1.25444	0.245	1.0398	0.97577-1.10802	0.03118	0.40762	0.21	23.2402	17	0.14159	22.2351	16	0.13576	1.00559e-104	0.06163
ebi-a-GCST90001823	7	0.294	1.29885	0.83844-2.0121	0.304	1.10154	0.91588-1.32483	0.267	1.11391	0.92085-1.34746	0.331	1.17569	0.87112-1.58673	0.328	1.10461	0.91962-1.32680	-0.07666	0.47588	0.385	8.39137	6	0.21081	7.50104	5	0.18596	9.01047e-99	0.217519
ebi-a-GCST90001939	8	0.394	0.74617	0.39919-1.3947	0.436	0.82754	0.51371-1.33309	0.269	0.80947	0.55663-1.17716	0.583	0.82619	0.43096-1.58391	0.35	0.78048	0.48024-1.26845	0.02061	0.76086	0.656	5.69589	7	0.57567	5.59441	6	0.47012	2.50637e-41	0.166731
ebi-a-GCST90001712	9	0.257	0.83467	0.62648-1.1121	0.124	0.89448	0.77589-1.03120	0.269	0.89645	0.73862-1.08801	0.373	1.15884	0.85301-1.57432	0.036	0.8477	0.74555-0.96386	0.07164	0.51725	0.147	23.9029	8	0.00238	22.4142	7	0.00215	0	0.376822
ebi-a-GCST90001727	8	0.452	1.03991	0.94535-1.1439	0.456	1.04486	0.93098-1.17268	0.27	1.04741	0.96467-1.13725	0.292	1.13255	0.91421-1.40304	0.323	1.0506	0.95920-1.15070	0.01052	0.77951	0.606	5.14819	7	0.64188	5.06243	6	0.53583	8.43856e-42	0.0625766
ebi-a-GCST90002063	17	0.473	0.92256	0.74456-1.1431	0.422	0.91919	0.74843-1.12892	0.271	0.91797	0.78824-1.06906	0.789	0.95577	0.68969-1.32451	0.475	0.91828	0.73082-1.15382	-0.00228	0.94916	0.913	9.74573	16	0.87957	9.74153	15	0.83568	1.62913e-96	0.105542
ebi-a-GCST90001487	14	0.89	0.98444	0.79259-1.2227	0.635	1.05846	0.83742-1.33785	0.272	1.09401	0.93181-1.28443	0.46	1.16817	0.78315-1.74249	0.774	1.03929	0.80310-1.34495	0.05594	0.19582	0.389	13.8398	13	0.38523	11.9633	12	0.44863	1.55176e-81	0.104234
ebi-a-GCST90002120	11	0.386	1.9795	0.45606-8.5919	0.649	1.10746	0.71320-1.71967	0.275	1.19214	0.86959-1.63432	0.415	1.27766	0.72604-2.24840	0.421	1.21392	0.77181-1.90929	-0.1239	0.50564	0.699	7.44674	10	0.6827	6.96613	9	0.64065	6.21148e-69	0.279365
ebi-a-GCST90001479	7	0.221	0.77875	0.54845-1.1058	0.427	0.8801	0.64202-1.20647	0.277	0.87311	0.68378-1.11485	0.85	1.05051	0.64314-1.71592	0.262	0.8233	0.60524-1.11993	0.05152	0.41334	0.733	3.16993	6	0.78724	2.37455	5	0.79526	6.50742e-38	0.0960583
ebi-a-GCST90002033	13	0.077	1.27714	0.99873-1.6332	0.123	1.22909	0.94571-1.59740	0.277	1.10296	0.92424-1.31624	0.459	0.83494	0.52586-1.32568	0.093	1.24653	0.98411-1.57894	-0.05987	0.12082	0.643	7.85201	12	0.79659	5.02474	11	0.92996	1.12624e-77	0.121867
ebi-a-GCST90001806	22	0.387	0.86529	0.62779-1.1926	0.316	0.88772	0.70339-1.12036	0.28	0.91655	0.78256-1.07349	0.103	0.75304	0.54326-1.04383	0.205	0.85083	0.66799-1.08373	0.01724	0.69052	0.582	19.6929	21	0.54078	19.5297	20	0.48767	1.30433e-296	0.177365
ebi-a-GCST90001418	11	0.196	1.11162	0.95820-1.2896	0.23	1.07147	0.95717-1.19942	0.28	1.07221	0.94483-1.21676	0.315	1.31784	0.79052-2.19690	0.14	1.08665	0.98181-1.20269	-0.05457	0.37847	0.373	16.9722	10	0.07498	15.495	9	0.07821	1.10826e-58	0.0719766
ebi-a-GCST90001843	13	0.456	0.91512	0.73058-1.1463	0.177	0.86964	0.71006-1.06508	0.282	0.92078	0.79221-1.07020	0.324	0.84102	0.60445-1.17017	0.159	0.86125	0.70887-1.04638	0.00303	0.94384	0.892	7.09867	12	0.85102	7.09348	11	0.79146	3.90287e-145	0.124863
ebi-a-GCST90001649	14	0.655	1.06782	0.80632-1.4141	0.745	0.96082	0.75503-1.22269	0.282	0.90829	0.76223-1.08234	0.67	1.09863	0.72014-1.67604	0.803	0.96975	0.76529-1.22884	-0.05266	0.17404	0.676	10.9543	13	0.61464	8.86604	12	0.71433	4.2007e-225	0.174164
ebi-a-GCST90001614	8	0.665	0.77149	0.25240-2.3582	0.476	0.84913	0.54137-1.33187	0.284	0.81918	0.56887-1.17961	0.641	0.86509	0.48265-1.55059	0.577	0.83806	0.46381-1.51431	0.01206	0.915	0.947	2.13698	7	0.95187	2.12459	6	0.90789	4.37076e-47	0.160985
ebi-a-GCST90001426	12	0.212	0.80062	0.57735-1.1102	0.626	0.92829	0.68840-1.25178	0.284	0.87478	0.68492-1.11728	0.373	1.28082	0.75991-2.15881	0.043	0.67894	0.48752-0.94552	0.04563	0.43285	0.058	23.5343	11	0.01485	22.061	10	0.0148	3.09373e-66	0.126552
ebi-a-GCST90001703	11	0.038	0.81023	0.68396-0.9598	0.129	0.9012	0.78790-1.03081	0.285	0.92038	0.79049-1.07161	0.425	1.18203	0.79685-1.75341	0.017	0.83987	0.74463-0.94729	0.11722	0.05057	0.201	18.9406	10	0.04102	12.1019	9	0.20762	0	0.242677
ebi-a-GCST90002070	12	0.572	0.91569	0.68164-1.2301	0.227	0.84198	0.63685-1.11318	0.286	0.89519	0.73037-1.09720	0.589	0.88533	0.57666-1.35922	0.307	0.85879	0.65000-1.13463	-0.01042	0.83973	0.61	9.80712	11	0.54782	9.76404	10	0.46143	3.67039e-70	0.117875
ebi-a-GCST90002018	7	0.227	0.81655	0.61190-1.0896	0.205	0.85686	0.67461-1.08833	0.287	0.891	0.72050-1.10183	0.846	0.94159	0.52615-1.68506	0.209	0.85288	0.68330-1.06454	0.09425	0.41218	0.412	7.19553	6	0.30314	6.20346	5	0.28692	5.55577e-47	0.100656
ebi-a-GCST90001978	9	0.426	1.06932	0.91524-1.2493	0.269	1.10306	0.92683-1.31280	0.287	1.07062	0.94416-1.21402	0.511	1.09907	0.83968-1.43859	0.386	1.08113	0.91506-1.27733	0.00138	0.98	0.544	6.21567	8	0.62309	6.21499	7	0.51488	1.0148e-45	0.0690385
ebi-a-GCST90001936	11	0.083	1.23843	0.99846-1.5361	0.218	1.13851	0.92639-1.39921	0.288	1.09718	0.92458-1.30201	0.653	0.88366	0.52366-1.49115	0.176	1.15719	0.95068-1.40856	-0.06606	0.10285	0.608	6.20548	10	0.79771	2.90972	9	0.96777	3.3671e-56	0.089973
ebi-a-GCST90001985	20	0.437	1.04172	0.94183-1.1522	0.157	1.0763	0.97206-1.19173	0.289	1.0408	0.96670-1.12058	0.304	0.91348	0.77233-1.08043	0.272	1.05156	0.96382-1.14729	-0.00102	0.97947	0.312	21.3239	19	0.31918	21.323	18	0.26343	0	0.0820659
ebi-a-GCST90001809	8	0.548	1.45082	0.46168-4.5592	0.704	1.11424	0.63720-1.94840	0.289	1.35735	0.77147-2.38816	0.961	1.0191	0.48905-2.12364	0.982	1.00895	0.48365-2.10477	-0.01422	0.89729	0.085	14.7978	7	0.03868	14.7532	6	0.02227	6.04559e-39	0.424661
ebi-a-GCST90002017	12	0.05	0.60786	0.39248-0.9414	0.454	0.90656	0.70109-1.17225	0.291	0.89791	0.73522-1.09660	0.86	0.96715	0.67219-1.39153	0.419	0.89607	0.69362-1.15762	0.1349	0.07778	0.723	8.25319	11	0.69046	4.39166	10	0.92795	6.91464e-105	0.145858
ebi-a-GCST90001411	6	0.081	0.44879	0.22827-0.8823	0.105	0.67268	0.41645-1.08657	0.292	0.7796	0.49063-1.23876	0.446	0.72663	0.34093-1.54868	0.259	0.71079	0.42022-1.20228	0.14529	0.12717	0.202	8.29746	5	0.14059	4.31643	4	0.36487	3.91646e-31	0.162067
ebi-a-GCST90002020	10	0.454	1.56426	0.51262-4.7733	0.92	1.01659	0.73880-1.39881	0.293	1.16866	0.87402-1.56263	0.578	0.88052	0.57136-1.35697	0.66	0.90707	0.59553-1.38158	-0.07852	0.60904	0.109	15.3455	9	0.08187	14.8208	8	0.06273	6.65373e-56	0.304925
ebi-a-GCST90001629	19	0.24	1.18476	0.90190-1.5563	0.223	1.14608	0.92038-1.42714	0.294	1.09453	0.92473-1.29551	0.609	0.90254	0.61349-1.32779	0.337	1.11163	0.90093-1.37161	-0.02751	0.47536	0.337	21.0774	18	0.27552	20.4369	17	0.2525	1.93928e-167	0.152977
ebi-a-GCST90001642	15	0.593	1.11503	0.75542-1.6458	0.92	1.0166	0.73766-1.40102	0.3	1.12484	0.90065-1.40484	0.768	1.08605	0.63457-1.85876	0.573	0.88811	0.59328-1.32947	0.00215	0.95715	0.412	14.2173	14	0.43365	14.214	13	0.35895	1.46968e-85	0.146056
ebi-a-GCST90001462	9	0.369	0.92999	0.80180-1.0787	0.329	0.93285	0.81123-1.07269	0.3	0.93848	0.83225-1.05827	0.758	1.05954	0.74274-1.51146	0.319	0.92809	0.80864-1.06519	0.01236	0.8192	0.529	8.14024	8	0.41989	8.07526	7	0.326	1.17578e-215	0.105319
ebi-a-GCST90001465	13	0.543	0.93936	0.77268-1.1420	0.846	0.98004	0.80010-1.20046	0.3	0.92163	0.78975-1.07554	0.998	0.99954	0.69283-1.44202	0.694	0.96463	0.80965-1.14928	-0.01322	0.76072	0.648	9.81195	12	0.63245	9.71448	11	0.55624	1.87627e-258	0.155227
ebi-a-GCST90002003	6	0.828	0.91537	0.43359-1.9325	0.803	0.94217	0.58990-1.50479	0.301	0.82069	0.56422-1.19374	0.895	1.04368	0.57097-1.90775	0.996	0.99847	0.57594-1.73098	-0.03074	0.74844	0.422	5.55067	5	0.35242	5.39152	4	0.24943	7.5145e-42	0.148944
ebi-a-GCST90001699	15	0.509	0.99712	0.98887-1.0054	0.821	0.99904	0.99075-1.00740	0.301	0.99638	0.98956-1.00326	0.861	1.00178	0.98242-1.02152	0.868	0.99939	0.99231-1.00652	-0.01254	0.74052	0.469	15.0425	14	0.37526	14.9112	13	0.31293	6.78882e-87	0.0500833
ebi-a-GCST90002026	11	0.809	0.95821	0.68485-1.3407	0.338	0.86956	0.65350-1.15707	0.302	0.89609	0.72767-1.10350	0.299	0.79041	0.51901-1.20373	0.313	0.85349	0.63737-1.14289	-0.0227	0.63016	0.561	8.74312	10	0.55664	8.49472	9	0.48516	1.08266e-60	0.10817
ebi-a-GCST90001634	13	0.842	0.96224	0.66514-1.3921	0.195	0.83654	0.63865-1.09575	0.304	0.89863	0.73292-1.10181	0.271	0.77341	0.49998-1.19636	0.29	0.81672	0.57076-1.16867	-0.02322	0.67174	0.878	6.67417	12	0.87837	6.48466	11	0.83915	2.20904e-118	0.133968
ebi-a-GCST90001769	15	0.815	1.02863	0.81569-1.2972	0.667	1.0489	0.84374-1.30394	0.306	1.0885	0.92549-1.28022	0.855	0.96584	0.66947-1.39341	0.675	1.03923	0.87128-1.23956	0.02471	0.51524	0.662	12.5611	14	0.56133	12.1136	13	0.51835	8.58737e-105	0.107423
ebi-a-GCST90001681	12	0.09	0.66533	0.43441-1.0190	0.507	0.90037	0.66036-1.22761	0.308	0.88767	0.70584-1.11633	0.876	1.04576	0.60508-1.80737	0.231	0.78743	0.54441-1.13893	0.08761	0.14698	0.616	8.39363	11	0.67767	5.92189	10	0.82178	2.34025e-68	0.121347
ebi-a-GCST90001454	6	0.985	0.98559	0.24241-4.0072	0.978	0.99201	0.56597-1.73874	0.308	1.28856	0.79125-2.09845	0.909	0.94956	0.40772-2.21147	0.761	0.88071	0.40568-1.91196	0.05519	0.70612	0.232	7.32479	5	0.19758	7.0361	4	0.13399	5.23799e-31	0.280987
ebi-a-GCST90001397	17	0.353	0.89865	0.72230-1.1180	0.363	0.918	0.76357-1.10367	0.312	0.92215	0.78808-1.07903	0.163	0.81286	0.61574-1.07307	0.176	0.88428	0.74597-1.04823	0.01259	0.7354	0.167	23.1176	16	0.11063	22.9363	15	0.0855	7.07601e-88	0.0878649
ebi-a-GCST90001722	12	0.356	1.21128	0.82166-1.7857	0.384	1.17423	0.81772-1.68619	0.313	1.1326	0.88906-1.44284	0.454	1.26621	0.69801-2.29693	0.136	1.41201	0.92772-2.14911	-0.02136	0.6735	0.647	6.85662	11	0.81057	6.66827	10	0.75635	1.51137e-62	0.130409
ebi-a-GCST90001593	9	0.998	0.99961	0.73305-1.3631	0.744	1.04269	0.81115-1.34032	0.314	1.1112	0.90518-1.36411	0.408	1.24363	0.76271-2.02781	0.694	1.04862	0.83482-1.31718	0.03961	0.39799	0.481	8.55803	8	0.38094	7.67032	7	0.36256	2.77219e-47	0.0918966
ebi-a-GCST90002112	9	0.293	1.13318	0.91340-1.4058	0.277	1.09283	0.93111-1.28264	0.316	1.07049	0.93698-1.22302	0.844	0.97054	0.72786-1.29414	0.352	1.0848	0.92303-1.27492	-0.03156	0.53161	0.674	6.64363	8	0.57552	6.21076	7	0.51537	5.53649e-143	0.1437
ebi-a-GCST90001907	14	0.753	0.97631	0.84347-1.1301	0.361	0.93629	0.81286-1.07845	0.317	0.94098	0.83535-1.05997	0.262	0.79223	0.53668-1.16947	0.289	0.92575	0.80732-1.06156	-0.02899	0.40277	0.57	13.685	13	0.3964	12.8777	12	0.37799	1.56199e-112	0.0829203
ebi-a-GCST90002090	13	0.827	1.0463	0.70449-1.5539	0.787	1.03573	0.80290-1.33608	0.32	1.10567	0.90696-1.34792	0.626	1.10146	0.75418-1.60864	0.995	1.00105	0.73042-1.37195	0.01627	0.75793	0.912	6.23477	12	0.90379	6.13493	11	0.86421	4.91689e-110	0.157152
ebi-a-GCST90001754	12	0.862	0.95557	0.58078-1.5722	0.752	1.05286	0.76507-1.44889	0.32	1.12769	0.88972-1.42931	0.822	0.94388	0.57702-1.54400	0.889	1.0287	0.69882-1.51430	0.03904	0.47556	0.547	10.3916	11	0.49555	9.84203	10	0.45446	5.71108e-78	0.141396
ebi-a-GCST90001661	15	0.842	1.03463	0.74595-1.4350	0.295	1.17129	0.87114-1.57484	0.321	1.10644	0.90615-1.35100	0.962	0.98902	0.63074-1.55083	0.327	1.18236	0.85593-1.63326	0.02059	0.62024	0.529	13.215	14	0.50967	12.9574	13	0.45111	4.58501e-86	0.123484
ebi-a-GCST90002022	6	0.911	1.06182	0.39401-2.8615	0.413	0.84337	0.56076-1.26842	0.324	0.85653	0.62975-1.16497	0.568	0.8702	0.55676-1.36010	0.513	0.85612	0.55552-1.31936	-0.05539	0.67812	0.899	1.69567	5	0.88944	1.49601	4	0.82735	2.24659e-43	0.129095
ebi-a-GCST90001742	17	0.374	0.85266	0.60649-1.1987	0.395	0.8768	0.64771-1.18692	0.325	0.90237	0.73547-1.10714	0.675	0.90106	0.55844-1.45389	0.448	0.88762	0.65736-1.19853	0.01782	0.68928	0.724	12.9729	16	0.67473	12.8068	15	0.61722	9.55218e-99	0.116312
ebi-a-GCST90002080	9	0.38	2.02933	0.46111-8.9310	0.454	1.21694	0.72755-2.03553	0.325	1.21798	0.82242-1.80379	0.601	1.26218	0.54523-2.92192	0.559	1.29706	0.56174-2.99491	-0.07777	0.50635	0.685	5.41086	8	0.71289	4.92046	7	0.66967	2.19404e-48	0.247176
ebi-a-GCST90001660	16	0.494	0.91228	0.70624-1.1784	0.549	0.93863	0.76300-1.15470	0.326	0.92729	0.79765-1.07800	0.638	0.92509	0.67320-1.27122	0.637	0.95035	0.77261-1.16898	0.00584	0.8771	0.48	16.1503	15	0.37213	16.1217	14	0.306	6.99772e-217	0.128354
ebi-a-GCST90001505	11	0.208	0.79265	0.56664-1.1088	0.767	0.95283	0.69256-1.31093	0.326	0.88755	0.69959-1.12602	0.771	1.07337	0.67526-1.70618	0.087	0.7704	0.58832-1.00884	0.04715	0.37351	0.959	2.64801	10	0.98854	1.77115	9	0.99459	7.56562e-77	0.122473
ebi-a-GCST90001549	17	0.266	1.30114	0.83213-2.0345	0.502	1.13419	0.78560-1.63745	0.327	1.13257	0.88298-1.45271	0.414	1.26992	0.72691-2.21857	0.49	1.18668	0.73831-1.90735	-0.03288	0.47517	0.567	14.5217	16	0.55991	13.9852	15	0.52666	3.22551e-86	0.166135
ebi-a-GCST90002079	11	0.189	1.37656	0.88629-2.1380	0.277	1.21835	0.85358-1.73902	0.327	1.14246	0.87525-1.49124	0.457	1.21535	0.74114-1.99298	0.319	1.21535	0.84389-1.75032	-0.04563	0.32447	0.913	4.57607	10	0.91764	3.48974	9	0.94169	4.5472e-61	0.153718
ebi-a-GCST90001522	7	0.82	0.92636	0.49493-1.7339	0.272	1.21816	0.85677-1.73199	0.33	1.14517	0.87192-1.50407	0.398	1.26858	0.75990-2.11777	0.35	1.28066	0.79381-2.06611	0.05515	0.49462	0.585	4.5467	6	0.60312	4.00455	5	0.54876	1.03164e-37	0.159024
ebi-a-GCST90002088	16	0.279	1.25158	0.84721-1.8490	0.437	1.12085	0.84087-1.49406	0.333	1.10477	0.90312-1.35145	0.691	1.0941	0.70836-1.68991	0.248	1.19542	0.89345-1.59945	-0.04089	0.47631	0.634	13.5392	15	0.56072	13.0035	14	0.52625	1.10171e-118	0.162994
ebi-a-GCST90001845	15	0.827	1.05522	0.65844-1.6911	0.207	0.86023	0.68103-1.08659	0.334	0.89493	0.71429-1.12124	0.916	0.97722	0.64086-1.49012	0.289	0.88042	0.70197-1.10423	-0.04962	0.44774	0.088	23.2433	14	0.05642	22.1969	13	0.05239	8.21468e-186	0.217569
ebi-a-GCST90001889	10	0.336	1.21181	0.83903-1.7502	0.215	1.19965	0.89973-1.59953	0.337	1.12137	0.88769-1.41657	0.152	0.66456	0.39861-1.10796	0.071	1.31913	1.01127-1.72072	-0.04133	0.5963	0.174	13.9645	9	0.12359	13.4529	8	0.09719	1.04926e-80	0.155397
ebi-a-GCST90001868	7	0.111	0.72552	0.52382-1.0049	0.242	0.88189	0.71433-1.08876	0.339	0.91357	0.75913-1.09943	0.948	1.01367	0.68482-1.50045	0.305	0.88054	0.70502-1.09976	0.10356	0.15269	0.569	5.37402	6	0.49681	2.53291	5	0.77153	7.10007e-179	0.156967
ebi-a-GCST90002077	13	0.654	0.9288	0.67827-1.2719	0.441	0.90692	0.70736-1.16278	0.34	0.91261	0.75633-1.10117	0.914	1.01978	0.71896-1.44646	0.552	0.91989	0.70379-1.20234	-0.00612	0.89369	0.803	8.49651	12	0.74523	8.47781	11	0.66997	3.16269e-161	0.148861
ebi-a-GCST90001782	10	0.102	0.89065	0.78763-1.0071	0.373	0.94422	0.83212-1.07144	0.342	0.95424	0.86630-1.05110	0.959	0.99443	0.80714-1.22518	0.327	0.94073	0.83799-1.05606	0.08667	0.11288	0.558	8.37087	9	0.49725	5.20097	8	0.7359	8.09716e-84	0.0724236
ebi-a-GCST90001569	11	0.174	1.44147	0.88671-2.3433	0.596	1.10717	0.75994-1.61306	0.344	1.13968	0.86910-1.49448	0.795	0.92942	0.54306-1.59065	0.858	1.04524	0.65253-1.67429	-0.05807	0.28304	0.519	9.54486	10	0.48129	8.24133	9	0.51002	1.29795e-66	0.150952
ebi-a-GCST90001492	14	0.889	1.01089	0.87091-1.1734	0.523	0.94522	0.79508-1.12370	0.345	0.94371	0.83674-1.06436	0.055	0.72524	0.53828-0.97714	0.242	0.90255	0.76605-1.06337	-0.05647	0.16137	0.424	13.3824	13	0.41873	11.1546	12	0.51572	1.10065e-93	0.0719591
ebi-a-GCST90001432	13	0.498	1.21547	0.70406-2.0984	0.671	1.08508	0.74480-1.58081	0.345	1.17021	0.84426-1.62200	0.704	0.88393	0.47492-1.64520	0.644	1.11746	0.70591-1.76895	-0.01064	0.86484	0.076	20.3735	12	0.06034	20.3174	11	0.04117	3.18029e-78	0.217706
ebi-a-GCST90001581	12	0.381	1.10512	0.89246-1.3685	0.608	1.05832	0.85212-1.31443	0.346	1.08478	0.91585-1.28487	0.53	0.84512	0.50788-1.40629	0.585	1.0542	0.87725-1.26683	-0.01205	0.78594	0.805	7.73827	11	0.73654	7.66044	10	0.66197	1.17183e-68	0.0850623
ebi-a-GCST90002101	7	0.543	1.21596	0.67593-2.1874	0.993	1.00184	0.65788-1.52564	0.349	0.8443	0.59250-1.20311	0.832	0.922	0.44880-1.89411	0.723	1.09085	0.68995-1.72469	-0.09885	0.20365	0.274	7.1283	6	0.30914	4.99151	5	0.41692	6.2748e-38	0.133109
ebi-a-GCST90001942	5	0.209	0.89191	0.77490-1.0266	0.32	0.93374	0.81576-1.06879	0.352	0.9436	0.83495-1.06639	0.95	1.01278	0.69787-1.46979	0.323	0.93005	0.81981-1.05511	0.09927	0.20982	0.609	3.79896	4	0.4339	1.26733	3	0.73691	1.39109e-30	0.0572041
ebi-a-GCST90001507	15	0.476	0.91338	0.71693-1.1637	0.547	0.93545	0.75298-1.16213	0.356	0.92669	0.78823-1.08947	0.696	0.93675	0.67930-1.29178	0.473	0.92506	0.75201-1.13794	0.00871	0.87355	0.314	17.065	14	0.25273	17.0305	13	0.19791	3.24682e-111	0.0941982
ebi-a-GCST90001824	14	0.394	1.15473	0.83925-1.5888	0.246	1.1098	0.93075-1.32328	0.364	1.08286	0.91179-1.28603	0.676	0.91785	0.61950-1.35990	0.306	1.10798	0.91752-1.33797	-0.02482	0.64351	0.297	17.3468	13	0.18393	17.027	12	0.14859	3.43456e-216	0.146447
ebi-a-GCST90001872	15	0.914	0.99273	0.87165-1.1306	0.335	0.94849	0.85187-1.05607	0.365	0.95811	0.87339-1.05104	0.125	0.81839	0.64312-1.04144	0.329	0.94916	0.85789-1.05014	-0.02773	0.45311	0.317	17.9518	14	0.20898	17.1621	13	0.192	4.42739e-98	0.079806
ebi-a-GCST90001805	14	0.655	1.10043	0.73075-1.6571	0.584	0.93233	0.72548-1.19816	0.367	0.90742	0.73468-1.12077	0.389	0.83157	0.55427-1.24760	0.433	0.89984	0.69696-1.16176	-0.06501	0.30333	0.341	16.3365	13	0.23143	14.9004	12	0.24693	9.62826e-221	0.173247
ebi-a-GCST90001726	14	0.567	0.87872	0.57129-1.3516	0.247	0.82538	0.59656-1.14197	0.37	0.88527	0.67839-1.15523	0.844	1.06148	0.59185-1.90378	0.326	0.84194	0.60496-1.17175	0.00299	0.9655	0.181	18.8632	13	0.12741	18.8601	12	0.09196	8.09966e-71	0.117949
ebi-a-GCST90002059	6	0.845	1.19035	0.23065-6.1433	0.587	0.87844	0.55048-1.40178	0.371	0.84739	0.58937-1.21837	0.587	0.81038	0.39789-1.65048	0.737	0.88867	0.46285-1.70623	-0.05745	0.69864	0.572	4.05473	5	0.54156	3.88152	4	0.42228	3.00235e-33	0.114937
ebi-a-GCST90001689	16	0.455	1.03296	0.95099-1.1220	0.397	1.04506	0.94382-1.15716	0.372	1.03505	0.95958-1.11644	0.819	1.01748	0.87935-1.17730	0.379	1.04062	0.95480-1.13416	0.00335	0.90689	0.856	10.2915	15	0.80101	10.2773	14	0.74164	1.82851e-89	0.0579865
ebi-a-GCST90001749	8	0.742	0.92538	0.59521-1.4387	0.904	0.98002	0.70554-1.36128	0.373	1.11567	0.87674-1.41972	0.281	1.37208	0.80662-2.33395	0.803	0.95472	0.67284-1.35469	0.0567	0.35974	0.658	4.39402	7	0.73344	3.41098	6	0.75577	1.97786e-42	0.127751
ebi-a-GCST90001919	9	0.063	1.45866	1.04350-2.0390	0.185	1.19032	0.92001-1.54005	0.377	1.12228	0.86893-1.44950	0.774	0.93684	0.60894-1.44129	0.053	1.34223	1.04095-1.73070	-0.14674	0.08345	0.054	18.8193	8	0.01586	11.9004	7	0.10388	2.08566e-46	0.109431
ebi-a-GCST90001556	7	0.338	0.88827	0.71347-1.1059	0.412	0.92445	0.76616-1.11544	0.378	0.92549	0.77906-1.09946	0.925	0.9863	0.74848-1.29968	0.232	0.89717	0.76459-1.05275	0.03714	0.54296	0.356	8.57169	6	0.19914	7.89931	5	0.16187	1.57042e-46	0.0695226
ebi-a-GCST90001604	9	0.882	0.90043	0.23755-3.4131	0.361	0.83124	0.55914-1.23577	0.379	0.85002	0.59177-1.22096	0.185	0.60787	0.31046-1.19019	0.516	0.83008	0.48527-1.41990	-0.01165	0.93191	0.273	11.2023	8	0.1905	11.1898	7	0.13055	7.65004e-63	0.153038
ebi-a-GCST90002087	22	0.783	1.02157	0.87929-1.1869	0.779	1.02223	0.87662-1.19204	0.379	1.053	0.93848-1.18149	0.819	1.03304	0.78451-1.36029	0.644	1.03304	0.90175-1.18344	0.01924	0.54361	0.919	13.1071	21	0.90483	12.7253	20	0.88886	4.35849e-167	0.0878299
ebi-a-GCST90001536	18	0.361	0.96505	0.89611-1.0393	0.314	0.96484	0.89983-1.03454	0.38	0.97222	0.91292-1.03538	0.293	0.90692	0.76016-1.08201	0.25	0.96552	0.91131-1.02296	0.01339	0.69531	0.284	22.3212	17	0.17268	22.1015	16	0.13994	6.57392e-110	0.0561518
ebi-a-GCST90001635	15	0.997	0.99922	0.67961-1.4691	0.321	0.86918	0.65909-1.14623	0.381	0.91422	0.74802-1.11736	0.345	0.8194	0.54973-1.22137	0.338	0.84487	0.60571-1.17847	-0.02954	0.60544	0.953	6.68399	14	0.94621	6.40371	13	0.93022	1.96657e-129	0.11473
ebi-a-GCST90001461	11	0.753	1.07678	0.68849-1.6841	0.567	1.09423	0.80411-1.48904	0.383	0.88639	0.67609-1.16210	0.992	0.99687	0.56703-1.75256	0.864	1.02834	0.75324-1.40389	-0.0592	0.31363	0.237	13.506	10	0.19674	11.9886	9	0.21395	4.47835e-150	0.193188
ebi-a-GCST90001498	13	0.389	1.31814	0.72064-2.4110	0.881	0.97208	0.67092-1.40844	0.384	0.87028	0.63636-1.19019	0.68	1.12683	0.64760-1.96070	0.723	1.07705	0.72120-1.60848	-0.10988	0.15022	0.179	16.9692	12	0.15076	13.9381	11	0.23644	1.31565e-71	0.143902
ebi-a-GCST90001567	12	0.275	0.81947	0.58446-1.1490	0.355	0.88064	0.67261-1.15302	0.387	0.89199	0.68861-1.15544	0.968	1.01139	0.58407-1.75133	0.431	0.89525	0.68643-1.16759	0.03442	0.45065	0.291	15.1473	11	0.17585	14.268	10	0.16111	2.81946e-61	0.10499
ebi-a-GCST90001574	13	0.336	0.79716	0.51259-1.2397	0.811	0.96076	0.69151-1.33484	0.388	0.88957	0.68191-1.16046	0.767	0.92081	0.53959-1.57137	0.885	1.03032	0.69252-1.53290	0.03268	0.54835	0.164	17.0014	12	0.14954	16.4287	11	0.12595	2.34733e-73	0.118649
ebi-a-GCST90001777	13	0.617	1.15316	0.67006-1.9846	0.231	1.21534	0.88348-1.67184	0.392	1.10731	0.87672-1.39856	0.334	1.28667	0.78747-2.10232	0.233	1.23722	0.88739-1.72497	-0.00896	0.87406	0.83	7.92567	12	0.79091	7.89934	11	0.72229	2.67263e-127	0.151342
ebi-a-GCST90001860	10	0.858	0.96866	0.69048-1.3589	0.236	0.88843	0.73060-1.08035	0.393	0.92642	0.77744-1.10393	0.133	0.79204	0.60056-1.04457	0.185	0.87151	0.72242-1.05136	-0.02339	0.76581	0.283	12.458	9	0.18871	12.3118	8	0.13783	4.92395e-205	0.136781
ebi-a-GCST90002109	6	0.306	1.64435	0.71552-3.7789	0.663	1.05731	0.82302-1.35828	0.393	1.097	0.88709-1.35659	0.777	0.94403	0.64768-1.37600	0.547	1.0919	0.83620-1.42578	-0.1404	0.37992	0.54	4.76445	5	0.4453	3.79209	4	0.43487	6.54119e-62	0.13953
ebi-a-GCST90001803	10	0.538	1.79044	0.30330-10.5694	0.443	1.19722	0.75578-1.89651	0.395	1.16037	0.82395-1.63413	0.761	0.89108	0.43395-1.82976	0.54	1.19774	0.68744-2.08683	-0.07164	0.63867	0.808	5.22281	9	0.81447	4.98471	8	0.75921	3.75603e-57	0.156856
ebi-a-GCST90001464	11	0.195	1.119	0.95595-1.3099	0.36	1.07232	0.92337-1.24529	0.395	1.05503	0.93251-1.19364	0.779	1.05367	0.73870-1.50292	0.319	1.0703	0.94277-1.21508	-0.05933	0.2683	0.965	3.68015	10	0.96062	2.28806	9	0.98605	1.63383e-246	0.0989837
ebi-a-GCST90001655	13	0.463	0.84346	0.54392-1.3080	0.329	0.85708	0.62868-1.16845	0.398	0.88624	0.66959-1.17300	0.114	1.8048	0.91495-3.56009	0.262	0.82941	0.60758-1.13222	0.01769	0.77281	0.113	20.0669	12	0.06583	19.9084	11	0.04661	8.9067e-68	0.117635
ebi-a-GCST90001816	14	0.921	0.98594	0.74887-1.2980	0.66	0.94399	0.73041-1.22004	0.4	0.91667	0.74864-1.12242	0.971	0.99316	0.69031-1.42887	0.686	0.95255	0.75631-1.19972	-0.03248	0.44963	0.184	18.703	13	0.1326	17.7971	12	0.12199	2.03485e-99	0.0985983
ebi-a-GCST90001654	15	0.886	1.02267	0.75717-1.3813	0.94	0.99087	0.78179-1.25586	0.4	0.9133	0.73949-1.12796	0.697	0.91132	0.57690-1.43959	0.893	1.01595	0.81052-1.27345	-0.04057	0.32016	0.293	18.2714	14	0.1947	16.8839	13	0.20467	3.58246e-88	0.100162
ebi-a-GCST90002114	5	0.989	1.03008	0.02364-44.8907	0.348	0.73552	0.38715-1.39738	0.4	0.79486	0.46563-1.35689	0.257	0.50368	0.18199-1.39403	0.262	0.59665	0.27479-1.29550	-0.04031	0.90012	0.366	4.98942	4	0.28838	4.95865	3	0.17485	8.30984e-28	0.150809
ebi-a-GCST90001938	8	0.287	0.66911	0.34087-1.3134	0.401	0.82382	0.52429-1.29445	0.401	0.85326	0.58903-1.23601	0.991	0.9963	0.52759-1.88140	0.399	0.80144	0.49454-1.29878	0.07747	0.42636	0.29	9.48998	7	0.21936	8.46346	6	0.20608	6.99146e-42	0.126563
ebi-a-GCST90001674	8	0.624	1.05071	0.87085-1.2677	0.379	1.09201	0.89748-1.32871	0.403	1.06655	0.91704-1.24043	0.414	1.2088	0.78774-1.85494	0.256	1.12333	0.93424-1.35068	0.01084	0.80053	0.547	6.09909	7	0.52823	6.02899	6	0.41995	4.46223e-40	0.0643553
ebi-a-GCST90001794	17	0.956	1.00343	0.89010-1.1312	0.992	0.99932	0.87679-1.13897	0.404	1.04399	0.94350-1.15518	0.965	1.00531	0.79444-1.27215	0.92	0.99418	0.88897-1.11183	0.04329	0.24506	0.633	12.6014	16	0.70165	11.1377	15	0.74277	9.72111e-123	0.0660236
ebi-a-GCST90001992	20	0.054	1.14793	1.00667-1.3090	0.044	1.16964	1.00447-1.36197	0.405	1.04768	0.93900-1.16893	0.537	0.92426	0.72306-1.18143	0.069	1.14718	0.99746-1.31938	-0.08346	0.0317	0.404	20.1115	19	0.3879	14.6866	18	0.68336	8.15155e-117	0.0683368
ebi-a-GCST90001391	9	0.743	1.07056	0.72334-1.5845	0.263	1.18293	0.88130-1.58779	0.405	1.11423	0.86386-1.43716	0.384	1.22281	0.79730-1.87540	0.81	1.04332	0.74616-1.45882	0.01741	0.79035	0.372	9.82649	8	0.27742	9.72053	7	0.20497	5.65288e-46	0.0932459
ebi-a-GCST90001523	14	0.076	1.23362	0.99795-1.5249	0.274	1.11238	0.91918-1.34619	0.406	1.0748	0.90677-1.27398	0.171	0.76936	0.53955-1.09706	0.427	1.07377	0.90571-1.27301	-0.07988	0.0852	0.117	21.2257	13	0.06858	16.4128	12	0.17305	9.05867e-83	0.110334
ebi-a-GCST90001876	6	0.721	0.97536	0.85858-1.1080	0.51	0.96815	0.87926-1.06602	0.406	0.96656	0.89198-1.04738	0.713	0.97493	0.85795-1.10786	0.537	0.96779	0.87844-1.06622	-0.01038	0.8664	0.972	1.04664	5	0.95872	1.01448	4	0.90759	2.05981e-42	0.0588679
ebi-a-GCST90001788	8	0.484	0.83892	0.52858-1.3315	0.468	0.86629	0.58800-1.27631	0.407	0.88212	0.65570-1.18673	0.907	0.95817	0.47815-1.92009	0.488	0.86203	0.57939-1.28255	0.01432	0.79036	0.68	5.15592	7	0.64094	5.07865	6	0.53377	4.26864e-41	0.090741
ebi-a-GCST90002089	15	0.782	1.03683	0.80646-1.3330	0.483	0.93375	0.77107-1.13075	0.409	0.93331	0.79236-1.09933	0.531	0.9193	0.71115-1.18838	0.659	0.96082	0.80770-1.14296	-0.04791	0.30098	0.305	18.2336	14	0.19635	16.7395	13	0.21149	2.15431e-97	0.0878579
ebi-a-GCST90001971	11	0.399	1.08413	0.90677-1.2962	0.908	1.01277	0.81648-1.25624	0.414	1.06582	0.91476-1.24182	0.91	0.97732	0.66400-1.43847	0.523	1.05997	0.89205-1.25950	-0.0123	0.72646	0.629	7.02082	10	0.72348	6.89052	9	0.64852	7.76295e-57	0.0701203
ebi-a-GCST90001979	9	0.517	0.88725	0.62913-1.2513	0.441	0.93778	0.79636-1.10432	0.414	0.91622	0.74264-1.13039	0.361	0.86768	0.65114-1.15625	0.386	0.92253	0.77638-1.09617	0.01699	0.81634	0.108	17.9358	8	0.02171	17.788	7	0.01296	0	0.257999
ebi-a-GCST90001902	10	0.071	1.30652	1.01535-1.6812	0.243	1.16851	0.89977-1.51752	0.415	1.08583	0.89066-1.32376	0.549	1.16788	0.71657-1.90341	0.105	1.24824	0.98086-1.58851	-0.08331	0.07672	0.237	11.1483	9	0.26568	7.02259	8	0.5342	9.08889e-74	0.0973566
ebi-a-GCST90001477	13	0.78	1.03062	0.83797-1.2676	0.673	1.04432	0.85356-1.27772	0.417	1.06433	0.91569-1.23709	0.764	1.04938	0.77153-1.42728	0.75	1.02965	0.86377-1.22739	0.02081	0.66576	0.946	5.58592	12	0.9355	5.38892	11	0.91088	3.46584e-77	0.0725995
ebi-a-GCST90001540	10	0.425	0.66277	0.25412-1.7285	0.293	0.81908	0.56484-1.18775	0.418	0.88092	0.64828-1.19705	0.329	0.76935	0.46772-1.26550	0.381	0.81179	0.52080-1.26536	0.07343	0.55459	0.289	11.6097	9	0.23622	11.0829	8	0.19705	8.69239e-63	0.118967
ebi-a-GCST90001993	7	0.935	0.97861	0.59738-1.6031	0.853	1.04139	0.67843-1.59853	0.42	1.15636	0.81256-1.64564	0.544	1.2381	0.64532-2.37543	0.858	1.0393	0.69348-1.55756	0.06903	0.38673	0.835	1.66455	6	0.94783	0.76611	5	0.97914	4.51388e-36	0.113014
ebi-a-GCST90001724	16	0.406	0.92704	0.77965-1.1023	0.527	0.94581	0.79572-1.12420	0.424	0.94401	0.81972-1.08714	0.853	0.96169	0.64050-1.44396	0.477	0.94526	0.81254-1.09966	0.01216	0.71113	0.6	15.8137	15	0.39454	15.654	14	0.33496	1.18347e-93	0.0704205
ebi-a-GCST90001973	8	0.552	0.92204	0.71602-1.1873	0.503	0.91399	0.70268-1.18884	0.424	0.91707	0.74177-1.13381	0.172	0.65542	0.38035-1.12943	0.513	0.9186	0.72140-1.16971	-0.00344	0.94126	0.815	4.7484	7	0.69064	4.7425	6	0.57724	1.72971e-46	0.0762365
ebi-a-GCST90001671	12	0.428	0.86801	0.62028-1.2147	0.834	0.97385	0.76063-1.24684	0.426	0.92748	0.77056-1.11636	0.866	1.03097	0.72971-1.45659	0.911	0.98652	0.78270-1.24342	0.03454	0.65302	0.93	5.17361	11	0.92247	4.95889	10	0.89391	1.46004e-221	0.127993
ebi-a-GCST90001675	9	0.604	0.83296	0.43101-1.6098	0.482	0.87535	0.60398-1.26866	0.427	0.89215	0.67340-1.18196	0.728	0.90947	0.54269-1.52412	0.51	0.86337	0.56874-1.31064	0.01487	0.82779	0.918	3.58642	8	0.89238	3.53542	7	0.83146	1.02065e-48	0.0964966
ebi-a-GCST90001599	7	0.672	0.81201	0.32696-2.0166	0.398	0.8225	0.52304-1.29342	0.427	0.8615	0.59648-1.24427	0.451	0.76219	0.39394-1.47466	0.763	1.09983	0.60839-1.98823	0.01026	0.8946	0.911	1.80458	6	0.93677	1.78516	5	0.878	2.9338e-52	0.121049
ebi-a-GCST90001737	17	0.383	1.05104	0.94284-1.1717	0.986	0.99862	0.86067-1.15870	0.427	1.03822	0.94641-1.13894	0.596	1.10122	0.77644-1.56185	0.483	1.03821	0.93722-1.15010	-0.01465	0.6781	0.575	14.3589	16	0.572	14.1797	15	0.51195	3.0192e-90	0.0591268
ebi-a-GCST90001541	14	0.93	1.01492	0.73462-1.4022	0.468	1.1153	0.83079-1.49725	0.43	0.91861	0.74410-1.13406	0.471	0.79911	0.44200-1.44475	0.255	1.19912	0.88929-1.61690	-0.03506	0.43619	0.207	14.9023	13	0.31349	14.1379	12	0.29199	6.25858e-75	0.087437
ebi-a-GCST90001869	25	0.631	1.05833	0.84262-1.3293	0.388	1.1033	0.88239-1.37953	0.432	1.0604	0.91595-1.22764	0.667	0.92067	0.63459-1.33571	0.799	1.03311	0.80608-1.32409	0.00073	0.98268	0.694	19.8161	24	0.70718	19.8156	23	0.65301	1.50542e-162	0.0978175
ebi-a-GCST90001700	143	0.284	1.00148	0.99878-1.0042	0.944	1.0001	0.99738-1.00283	0.433	1.0007	0.99895-1.00245	0.986	1.00004	0.99564-1.00446	0.584	1.00074	0.99810-1.00340	-0.02023	0.45778	0.865	122.424	142	0.88095	121.869	141	0.87597	NA	0.0500367
ebi-a-GCST90001538	21	0.984	0.99769	0.80053-1.2434	0.708	1.03724	0.85690-1.25553	0.434	1.05423	0.92362-1.20331	0.832	0.97343	0.76176-1.24391	0.839	1.01923	0.84989-1.22231	0.0233	0.54662	0.963	10.12	20	0.96594	9.74327	19	0.959	2.58332e-114	0.0742181
ebi-a-GCST90001871	12	0.761	1.0838	0.65496-1.7934	0.298	1.1442	0.88801-1.47430	0.436	1.09582	0.87031-1.37977	0.307	1.20003	0.85951-1.67546	0.345	1.1447	0.87506-1.49743	0.00351	0.96194	0.124	17.6276	11	0.09063	17.6234	10	0.06166	3.48923e-76	0.180918
ebi-a-GCST90002000	12	0.108	1.25395	0.97510-1.6125	0.097	1.25804	0.95907-1.65022	0.438	1.08397	0.88416-1.32893	0.834	1.0695	0.57856-1.97703	0.107	1.23377	0.97602-1.55960	-0.06835	0.09476	0.342	11.6129	11	0.39343	8.20742	10	0.60858	4.67349e-65	0.0828503
ebi-a-GCST90001690	20	0.916	1.00369	0.93822-1.0737	0.91	1.00468	0.92636-1.08961	0.438	1.02543	0.96232-1.09269	0.789	1.02758	0.84440-1.25049	0.811	1.00816	0.94415-1.07650	0.04586	0.08059	0.774	13.4423	19	0.81518	10.0146	18	0.93143	1.42445e-110	0.0551604
ebi-a-GCST90001532	17	0.67	1.01948	0.93457-1.1121	0.662	0.97902	0.89017-1.07674	0.443	1.02749	0.95863-1.10130	0.914	1.00778	0.87812-1.15659	0.939	0.9966	0.91494-1.08555	0.00939	0.76154	0.48	16.1968	16	0.43931	16.0943	15	0.37581	6.89846e-154	0.0633309
ebi-a-GCST90002010	6	0.304	1.31981	0.83206-2.0935	0.347	1.09089	0.91000-1.30773	0.444	1.06241	0.90987-1.24054	0.421	1.11729	0.87196-1.43163	0.411	1.0974	0.89546-1.34487	-0.0993	0.38321	0.902	1.50714	5	0.91224	0.54956	4	0.9685	4.04377e-195	0.0988601
ebi-a-GCST90002051	7	0.916	0.96016	0.46900-1.9657	0.906	0.98039	0.70447-1.36438	0.445	1.10069	0.86071-1.40760	0.877	1.04404	0.61870-1.76180	0.763	0.94378	0.65932-1.35096	0.04869	0.70716	0.608	3.71583	6	0.71507	3.55754	5	0.6147	1.51369e-37	0.110399
ebi-a-GCST90001508	12	0.274	0.93303	0.82972-1.0492	0.579	0.9654	0.85234-1.09344	0.447	0.96459	0.87909-1.05841	0.402	0.91662	0.75378-1.11466	0.489	0.95701	0.84841-1.07951	0.03943	0.38519	0.496	10.5649	11	0.4804	9.74026	10	0.46357	1.89412e-99	0.0590021
ebi-a-GCST90001489	22	0.525	0.97243	0.89342-1.0584	0.845	0.99133	0.90872-1.08147	0.449	0.97446	0.91135-1.04194	0.673	0.95249	0.76197-1.19064	0.661	0.98286	0.91076-1.06067	0.00192	0.938	0.9	13.2525	21	0.89952	13.2463	20	0.86657	0	0.0707535
ebi-a-GCST90002065	7	0.756	1.06329	0.73767-1.5327	0.667	1.0496	0.84211-1.30821	0.45	0.92199	0.74687-1.13816	0.841	1.03469	0.75204-1.42357	0.908	1.01351	0.81484-1.26062	-0.12259	0.39046	0.213	9.14289	6	0.1657	7.77026	5	0.16936	1.14575e-37	0.0721488
ebi-a-GCST90002103	7	0.822	0.95484	0.65171-1.3990	0.32	1.13197	0.88662-1.44522	0.453	1.11754	0.83619-1.49356	0.577	1.1425	0.73378-1.77886	0.391	1.11733	0.88331-1.41334	0.13873	0.28761	0.187	11.9351	6	0.06343	9.30225	5	0.0976	3.72675e-40	0.104607
ebi-a-GCST90001760	15	0.069	0.60476	0.36815-0.9934	0.148	0.76519	0.53239-1.09980	0.453	0.90933	0.70938-1.16565	0.655	0.8524	0.42949-1.69174	0.16	0.70658	0.44659-1.11792	0.10205	0.08903	0.343	15.1105	14	0.37064	11.7325	13	0.54969	1.20949e-96	0.105971
ebi-a-GCST90001723	20	0.679	0.93631	0.68874-1.2729	0.36	0.87864	0.66593-1.15929	0.454	0.92997	0.76913-1.12444	0.924	0.98067	0.65915-1.45902	0.62	0.93199	0.70866-1.22571	-0.00226	0.95584	0.49	19.4104	19	0.43081	19.407	18	0.36717	1.6624e-115	0.0891895
ebi-a-GCST90001795	12	0.969	1.01622	0.46082-2.2410	0.828	0.95729	0.64577-1.41908	0.454	0.89255	0.66274-1.20204	0.387	0.74148	0.38693-1.42092	0.568	1.17977	0.68002-2.04678	-0.02625	0.73568	0.803	6.40483	11	0.84503	6.28433	10	0.79084	7.85901e-77	0.112785
ebi-a-GCST90002100	14	0.234	0.76227	0.49844-1.1658	0.925	0.98518	0.72128-1.34564	0.457	0.91857	0.73434-1.14901	0.587	0.8671	0.52462-1.43315	0.792	0.94404	0.62055-1.43616	0.05275	0.33146	0.444	13.8176	13	0.38682	12.7308	12	0.38891	4.21895e-82	0.0973949
ebi-a-GCST90001773	16	0.802	0.97587	0.80909-1.1770	0.241	1.1029	0.93644-1.29895	0.462	1.05233	0.91864-1.20548	0.7	1.05611	0.80401-1.38724	0.382	1.0747	0.91879-1.25706	0.04188	0.27601	0.361	18.2625	15	0.24912	16.7272	14	0.27101	4.85569e-124	0.0731454
ebi-a-GCST90002116	15	0.447	1.13958	0.82222-1.5794	0.976	1.00248	0.85068-1.18137	0.462	1.05556	0.91390-1.21916	0.9	0.98162	0.73980-1.30247	0.96	0.99611	0.85745-1.15719	-0.03646	0.61448	0.288	17.6069	14	0.22527	17.2535	13	0.18798	0	0.119832
ebi-a-GCST90001579	12	0.474	1.21975	0.72257-2.0590	0.505	1.12342	0.79798-1.58158	0.464	1.10036	0.85205-1.42102	0.197	1.36372	0.87564-2.12386	0.684	1.08023	0.75224-1.55125	-0.02903	0.66795	0.821	7.09931	11	0.79099	6.90402	10	0.73447	1.30936e-100	0.121225
ebi-a-GCST90001779	15	0.914	1.00673	0.89357-1.1342	0.892	0.99031	0.86005-1.14030	0.465	1.03937	0.93717-1.15272	0.765	0.95902	0.73246-1.25567	0.986	1.00106	0.88813-1.12835	0.03799	0.30999	0.515	12.0675	14	0.60088	10.9513	13	0.6149	1.08007e-140	0.0644871
ebi-a-GCST90001748	14	0.347	1.54432	0.64626-3.6903	0.604	1.09736	0.77234-1.55916	0.465	1.10153	0.85002-1.42746	0.7	1.1173	0.64313-1.94109	0.614	1.14936	0.67809-1.94817	-0.06247	0.44134	0.593	11.9578	13	0.53111	11.3237	12	0.5014	1.02326e-87	0.114247
ebi-a-GCST90001865	8	0.815	1.10226	0.50412-2.4101	0.365	0.83521	0.56559-1.23338	0.465	0.90152	0.68264-1.19058	0.474	0.7895	0.42769-1.45739	0.389	0.78075	0.46056-1.32354	-0.03874	0.6088	0.499	6.43361	7	0.49013	6.13569	6	0.40816	3.97095e-52	0.094445
ebi-a-GCST90001997	15	0.728	1.07114	0.73367-1.5638	0.842	1.02372	0.81284-1.28931	0.465	0.93617	0.78422-1.11756	0.643	0.90892	0.61256-1.34866	0.994	1.00088	0.79706-1.25683	-0.04022	0.44406	0.685	11.4153	14	0.65315	10.7922	13	0.62822	4.8574e-164	0.0949192
ebi-a-GCST90001472	11	0.537	1.06816	0.87346-1.3063	0.817	1.02384	0.83879-1.24971	0.465	0.94215	0.80284-1.10564	0.578	1.10906	0.77915-1.57867	0.991	0.99898	0.84539-1.18046	-0.09152	0.09807	0.409	11.2694	10	0.33692	7.86402	9	0.54791	0	0.117673
ebi-a-GCST90002046	14	0.26	1.05875	0.96307-1.1639	0.437	1.03242	0.95256-1.11898	0.466	1.02931	0.95238-1.11245	0.66	0.96883	0.84418-1.11189	0.544	1.02131	0.95583-1.09128	-0.04903	0.32916	0.158	20.52	13	0.08298	18.8913	12	0.09119	7.87032e-83	0.0600818
ebi-a-GCST90001428	11	0.589	1.2368	0.58749-2.6038	0.799	1.05803	0.68583-1.63222	0.477	1.12516	0.81279-1.55757	0.746	0.89222	0.45626-1.74474	0.921	0.96996	0.54053-1.74058	-0.01846	0.78811	0.896	4.62518	10	0.91477	4.5485	9	0.87176	2.17372e-56	0.113004
ebi-a-GCST90001755	17	0.828	0.94162	0.55205-1.6061	0.127	0.77216	0.55410-1.07605	0.481	0.91041	0.70110-1.18221	0.52	0.83063	0.47784-1.44387	0.258	0.80088	0.55244-1.16106	-0.00751	0.88792	0.162	21.4192	16	0.16295	21.3899	15	0.12483	8.16698e-110	0.111961
ebi-a-GCST90002014	11	0.649	0.86498	0.47310-1.5815	0.969	1.00553	0.76287-1.32539	0.483	1.08034	0.87076-1.34036	0.868	0.9595	0.59654-1.54330	0.577	1.09587	0.80293-1.49568	0.07268	0.45787	0.404	10.7218	10	0.3796	10.05	9	0.34645	7.32772e-99	0.105271
ebi-a-GCST90001530	14	0.207	0.8459	0.66152-1.0817	0.334	0.91848	0.77307-1.09124	0.483	0.95413	0.83690-1.08779	0.816	0.97056	0.75813-1.24251	0.406	0.93227	0.79431-1.09419	0.0459	0.27868	0.814	9.28006	13	0.75148	7.99264	12	0.78571	4.37211e-160	0.08863
ebi-a-GCST90001436	16	0.222	1.08842	0.95590-1.2393	0.257	1.06863	0.95267-1.19870	0.483	1.043	0.92725-1.17319	0.174	0.67515	0.39390-1.15722	0.219	1.07729	0.96137-1.20720	-0.04781	0.19477	0.286	22.6335	15	0.09224	19.986	14	0.13058	3.05599e-94	0.0621422
ebi-a-GCST90002008	12	0.694	0.97439	0.85933-1.1049	0.397	0.95077	0.84587-1.06869	0.484	0.96343	0.86796-1.06939	0.798	0.96392	0.73285-1.26785	0.57	0.97187	0.88330-1.06932	-0.01603	0.73187	0.358	14.5038	11	0.20636	14.3259	10	0.15864	4.33765e-74	0.0569858
ebi-a-GCST90001725	17	0.543	1.0315	0.93559-1.1372	0.894	0.99136	0.87268-1.12618	0.487	1.0304	0.94690-1.12127	0.964	1.00701	0.74728-1.35701	0.517	1.03101	0.94201-1.12842	-0.00135	0.96644	0.527	14.3554	16	0.57226	14.3536	15	0.4989	2.18603e-95	0.0560609
ebi-a-GCST90001771	13	0.978	1.00291	0.82206-1.2236	0.241	1.10909	0.93282-1.31868	0.489	1.05525	0.90626-1.22873	0.324	0.82089	0.56363-1.19558	0.408	1.06332	0.92403-1.22361	0.03437	0.44229	0.195	18.8232	12	0.09289	17.7955	11	0.08645	1.60312e-114	0.0740285
ebi-a-GCST90002081	12	0.697	1.18774	0.51250-2.7526	0.442	0.83857	0.53532-1.31361	0.489	0.88154	0.61693-1.25965	0.528	0.81261	0.43560-1.51595	0.61	0.86388	0.50000-1.49258	-0.05333	0.46029	0.95	4.44398	11	0.95509	3.8543	10	0.95368	1.81078e-63	0.123701
ebi-a-GCST90001544	11	0.602	1.08787	0.80171-1.4762	0.438	1.11276	0.84924-1.45804	0.489	1.07098	0.88193-1.30057	0.171	1.42768	0.88995-2.29034	0.233	1.25289	0.88495-1.77382	-0.00793	0.89534	0.155	13.614	10	0.19134	13.5863	9	0.13782	2.52693e-61	0.0733514
ebi-a-GCST90001925	9	0.405	1.4547	0.63511-3.3319	0.643	1.12403	0.68559-1.84284	0.491	1.13644	0.78960-1.63564	0.509	0.77529	0.37659-1.59611	0.82	1.08637	0.54371-2.17064	-0.0475	0.53642	0.833	4.04637	8	0.85292	3.62385	7	0.82194	6.63393e-46	0.125811
ebi-a-GCST90002115	9	0.572	0.84594	0.48665-1.4705	0.576	0.89275	0.60011-1.32809	0.492	0.90088	0.66894-1.21324	0.759	0.91094	0.51234-1.61965	0.805	0.9354	0.56014-1.56207	0.02197	0.79886	0.684	5.29013	8	0.72616	5.22006	7	0.63313	1.42027e-46	0.0884219
ebi-a-GCST90002032	12	0.235	0.89854	0.76108-1.0608	0.175	0.92408	0.82449-1.03570	0.497	0.96428	0.86823-1.07094	0.794	0.96055	0.71498-1.29048	0.221	0.92237	0.81628-1.04224	0.0371	0.30741	0.608	7.06987	11	0.7934	5.91313	10	0.82251	0	0.0956961
ebi-a-GCST90001810	10	0.597	1.09418	0.79438-1.5071	0.603	1.06379	0.84272-1.34287	0.497	1.06366	0.89019-1.27092	0.799	1.04818	0.73719-1.49035	0.714	1.05604	0.79619-1.40068	-0.01237	0.84017	0.945	3.0891	9	0.96066	3.04569	8	0.93146	1.07783e-58	0.0813064
ebi-a-GCST90002015	12	0.892	0.9812	0.75053-1.2828	0.627	1.05578	0.84847-1.31374	0.497	1.06649	0.88551-1.28445	0.463	1.16103	0.79016-1.70597	0.667	1.04159	0.86962-1.24756	0.03413	0.41178	0.313	14.3642	11	0.21349	13.3825	10	0.20307	5.66604e-123	0.0959748
ebi-a-GCST90001555	14	0.725	1.01635	0.93054-1.1101	0.858	1.00862	0.91795-1.10824	0.501	1.02691	0.95046-1.10951	0.638	1.05262	0.85415-1.29720	0.658	1.01809	0.94221-1.10008	0.017	0.64084	0.999	3.02982	13	0.99782	2.80078	12	0.99679	1.63959e-96	0.0549935
ebi-a-GCST90002061	16	0.738	0.94888	0.70190-1.2828	0.153	0.84529	0.67123-1.06448	0.501	0.94406	0.79830-1.11643	0.429	0.8498	0.57385-1.25845	0.199	0.8498	0.67038-1.07725	-0.00166	0.96878	0.827	9.70559	15	0.83784	9.704	14	0.78349	1.53036e-205	0.0994466
ebi-a-GCST90001831	7	0.817	1.11651	0.46098-2.7042	0.32	0.83106	0.57701-1.19696	0.502	0.90763	0.68400-1.20438	0.666	0.88845	0.53332-1.48004	0.827	0.95014	0.61217-1.47469	-0.0502	0.6486	0.546	5.20442	6	0.51788	4.96981	5	0.41958	3.02817e-59	0.094754
ebi-a-GCST90002016	12	0.888	0.98055	0.75112-1.2800	0.632	1.05471	0.84803-1.31177	0.502	1.06565	0.88504-1.28312	0.462	1.16115	0.79047-1.70566	0.662	1.04149	0.87239-1.24335	0.03426	0.40839	0.312	14.3767	11	0.21285	13.3803	10	0.20318	9.18932e-123	0.0947318
ebi-a-GCST90001494	17	0.24	0.92733	0.82178-1.0464	0.208	0.91393	0.79454-1.05126	0.506	0.96631	0.87353-1.06895	0.803	1.03974	0.76893-1.40593	0.19	0.91346	0.80233-1.03999	0.03501	0.2431	0.457	15.0812	16	0.5187	13.6047	15	0.5557	5.92036e-149	0.0617826
ebi-a-GCST90001850	11	0.03	0.4889	0.28355-0.8430	0.109	0.75061	0.52848-1.06609	0.507	0.90651	0.67850-1.21115	0.271	1.56436	0.73739-3.31876	0.074	0.6603	0.43947-0.99208	0.15632	0.03357	0.207	13.237	10	0.21072	6.96067	9	0.64121	1.47464e-79	0.108229
ebi-a-GCST90001964	13	0.892	1.02144	0.75813-1.3762	0.633	1.06332	0.82623-1.36844	0.508	1.06709	0.88038-1.29340	0.261	1.22645	0.87372-1.72158	0.565	1.07612	0.84376-1.37246	0.01489	0.71386	0.909	7.05831	12	0.85374	6.91671	11	0.80579	1.37868e-83	0.0825527
ebi-a-GCST90001659	17	0.376	1.0852	0.91037-1.2936	0.438	1.05286	0.92434-1.19924	0.509	1.04645	0.91441-1.19756	0.706	1.05051	0.81718-1.35047	0.326	1.06137	0.94584-1.19100	-0.0245	0.52496	0.115	26.7676	16	0.04414	26.0323	15	0.03768	4.09912e-240	0.084057
ebi-a-GCST90001730	13	0.41	1.05571	0.93259-1.1951	0.88	0.98985	0.86749-1.12948	0.512	1.0354	0.93324-1.14875	0.173	0.77005	0.54062-1.09685	0.35	1.04688	0.95447-1.14823	-0.02707	0.55843	0.402	15.8222	12	0.19952	15.3152	11	0.16852	5.19541e-75	0.056584
ebi-a-GCST90001565	6	0.91	1.02244	0.71148-1.4693	0.659	1.07329	0.78429-1.46878	0.514	1.10598	0.81714-1.49693	0.372	1.29233	0.77375-2.15845	0.854	1.03061	0.75977-1.39800	0.06686	0.45053	0.16	10.4108	5	0.0644	8.86451	4	0.06458	1.81494e-30	0.0761807
ebi-a-GCST90001955	13	0.8	1.02279	0.86300-1.2122	0.844	1.01091	0.90722-1.12646	0.515	1.03473	0.93361-1.14680	0.375	1.14537	0.85831-1.52843	0.817	1.01464	0.89975-1.14420	0.00865	0.86943	0.759	7.54739	12	0.81943	7.51908	11	0.75563	0	0.0935314
ebi-a-GCST90001423	8	0.754	1.15029	0.49814-2.6562	0.475	1.2053	0.72242-2.01095	0.517	1.13246	0.77755-1.64937	0.659	1.17785	0.58722-2.36257	0.619	1.17014	0.64773-2.11390	-0.00335	0.96797	0.402	7.59676	7	0.36949	7.59454	6	0.26934	5.99794e-41	0.101765
ebi-a-GCST90001395	9	0.823	1.1518	0.35036-3.7865	0.813	1.06777	0.62097-1.83606	0.519	0.86637	0.56039-1.33943	0.75	1.14003	0.52292-2.48538	0.778	1.1122	0.54347-2.27611	-0.05529	0.62708	0.399	8.96472	8	0.34528	8.64599	7	0.27908	3.41941e-48	0.112339
ebi-a-GCST90001914	11	0.412	1.12406	0.86126-1.4671	0.697	1.05662	0.80057-1.39457	0.519	1.06813	0.87402-1.30535	0.654	0.89813	0.56924-1.41706	0.759	1.04308	0.80280-1.35528	-0.03152	0.58199	0.866	4.78947	10	0.90479	4.46346	9	0.87835	9.13455e-57	0.071426
ebi-a-GCST90001694	14	0.984	0.99703	0.75485-1.3169	0.766	0.96368	0.75563-1.22902	0.52	0.93809	0.77197-1.13995	0.626	0.89898	0.59154-1.36621	0.866	0.98106	0.78899-1.21989	-0.02483	0.54915	0.343	16.1067	13	0.24341	15.6124	12	0.20964	6.89209e-81	0.0730573
ebi-a-GCST90001692	9	0.125	1.07746	0.99082-1.1717	0.118	1.05678	0.98613-1.13249	0.521	1.02374	0.95287-1.09988	0.855	0.98864	0.87803-1.11318	0.386	1.02772	0.96933-1.08964	-0.13297	0.11161	0.202	13.5503	8	0.09427	9.19864	7	0.23871	1.30211e-63	0.0526652
ebi-a-GCST90001404	16	0.981	1.0023	0.83090-1.2091	0.595	1.05116	0.87473-1.26318	0.522	1.04978	0.90458-1.21828	0.377	1.28137	0.75172-2.18421	0.553	1.05092	0.89502-1.23396	0.02968	0.43076	0.582	16.1207	15	0.37408	15.3968	14	0.35158	5.27639e-82	0.0642105
ebi-a-GCST90001622	20	0.492	0.85474	0.55104-1.3258	0.273	0.84297	0.62108-1.14413	0.524	0.93053	0.74569-1.16118	0.655	0.87616	0.49486-1.55126	0.584	0.8832	0.57021-1.36799	0.01833	0.6657	0.662	16.0859	19	0.65154	15.8929	18	0.60002	3.74132e-148	0.0980408
ebi-a-GCST90002037	11	0.949	0.99061	0.74649-1.3145	0.463	1.07598	0.88472-1.30860	0.524	1.06117	0.88397-1.27390	0.928	1.01456	0.74883-1.37459	0.498	1.069	0.88768-1.28737	0.03301	0.53883	0.29	13.8946	10	0.17785	13.2918	9	0.14984	1.43829e-75	0.0748023
ebi-a-GCST90001576	10	0.868	0.95161	0.53895-1.6802	0.664	1.08801	0.74348-1.59220	0.528	1.09987	0.81863-1.47773	0.66	1.12851	0.67019-1.90024	0.783	1.06773	0.67952-1.67773	0.03157	0.5752	0.856	5.13896	9	0.82203	4.7977	8	0.77896	7.18067e-50	0.085225
ebi-a-GCST90001738	9	0.813	0.97055	0.76499-1.2313	0.575	0.94753	0.78470-1.14414	0.528	0.9408	0.77837-1.13713	0.358	0.74794	0.41704-1.34140	0.612	0.95461	0.80339-1.13429	-0.03072	0.65262	0.473	11.5661	8	0.17164	11.2122	7	0.12963	2.30728e-56	0.0640039
ebi-a-GCST90001663	20	0.618	0.94478	0.75867-1.1766	0.548	0.93714	0.75816-1.15837	0.529	1.0515	0.89928-1.22948	0.725	0.92739	0.61312-1.40276	0.558	0.93929	0.76447-1.15409	0.0482	0.1982	0.191	24.5442	19	0.1761	22.33	18	0.21767	7.65028e-110	0.0714421
ebi-a-GCST90001583	14	0.581	1.03232	0.92489-1.1522	0.41	1.04811	0.93728-1.17204	0.529	1.03139	0.93668-1.13566	0.928	0.98784	0.76078-1.28268	0.533	1.0341	0.93314-1.14599	-0.00098	0.97388	0.829	9.03234	13	0.7705	9.03123	12	0.70026	3.92232e-76	0.055226
ebi-a-GCST90001987	19	0.4	1.03622	0.95586-1.1233	0.642	1.02049	0.93675-1.11170	0.53	1.02204	0.95479-1.09402	0.606	0.95404	0.80047-1.13709	0.58	1.0223	0.94688-1.10373	-0.02003	0.54184	0.864	13.3526	18	0.77022	12.965	17	0.73853	0	0.0599724
ebi-a-GCST90002121	11	0.873	0.95578	0.55718-1.6395	0.386	1.15428	0.83469-1.59623	0.534	1.07961	0.84809-1.37432	0.577	0.86434	0.52640-1.41923	0.54	1.12204	0.78646-1.60079	0.0323	0.63265	0.606	8.51064	10	0.57909	8.2659	9	0.50759	1.14979e-82	0.0951123
ebi-a-GCST90002118	6	0.346	0.34397	0.04851-2.4391	0.928	0.97552	0.57176-1.66441	0.536	0.87307	0.56826-1.34140	0.967	0.98502	0.49637-1.95474	0.969	0.9873	0.53828-1.81089	0.1568	0.39354	0.859	1.89528	5	0.86344	0.98277	4	0.9124	2.90809e-39	0.105376
ebi-a-GCST90002119	12	0.669	1.08216	0.76187-1.5371	0.775	0.96916	0.78169-1.20158	0.536	1.05583	0.88898-1.25399	0.287	1.23076	0.85517-1.77131	0.863	0.98054	0.78883-1.21884	-0.00911	0.87581	0.267	13.33	11	0.2723	13.2958	10	0.2076	6.59859e-194	0.0970301
ebi-a-GCST90002034	12	0.618	0.96156	0.82805-1.1166	0.484	0.94631	0.81094-1.10429	0.537	0.96029	0.84431-1.09221	0.191	0.74477	0.49200-1.12740	0.41	0.93945	0.81433-1.08380	-0.001	0.97359	0.764	8.43498	11	0.67389	8.43383	10	0.58654	1.14878e-65	0.0589076
ebi-a-GCST90001916	8	0.84	1.11331	0.41118-3.0144	0.882	0.96353	0.59027-1.57280	0.537	0.89549	0.63055-1.27175	0.742	0.87974	0.42276-1.83069	0.978	0.99034	0.51090-1.91966	-0.03682	0.66325	0.585	5.69282	7	0.57604	5.48329	6	0.48348	2.16923e-42	0.0883628
ebi-a-GCST90001741	12	0.677	1.02672	0.91023-1.1581	0.813	1.01618	0.88990-1.16037	0.539	1.03112	0.93513-1.13695	0.775	1.04337	0.78516-1.38648	0.495	1.03556	0.93981-1.14107	0.00624	0.89742	0.358	14.0148	11	0.23218	13.9903	10	0.17343	2.74473e-67	0.0545719
ebi-a-GCST90001401	12	0.315	0.67484	0.32586-1.3976	0.583	0.89754	0.61029-1.31998	0.54	0.9135	0.68410-1.21982	0.564	0.81969	0.42551-1.57903	0.689	0.9104	0.58148-1.42538	0.06703	0.39525	0.841	6.26585	11	0.85505	5.47678	10	0.85714	1.28548e-86	0.0952111
ebi-a-GCST90001566	7	0.701	0.83691	0.35498-1.9731	0.95	1.01643	0.60838-1.69817	0.54	1.1333	0.75926-1.69161	0.987	1.0061	0.49792-2.03295	0.974	0.9897	0.54519-1.79664	0.05977	0.46878	0.95	1.65209	6	0.94876	1.03816	5	0.95943	3.38287e-38	0.101355
ebi-a-GCST90001598	13	0.509	1.21236	0.69765-2.1068	0.764	0.94675	0.66208-1.35380	0.541	0.92134	0.70872-1.19775	0.556	0.84171	0.48161-1.47106	0.994	0.99831	0.64079-1.55531	-0.061	0.29342	0.397	13.0046	12	0.3687	11.7088	11	0.38593	5.8096e-78	0.0841136
ebi-a-GCST90001981	16	0.432	0.93696	0.80018-1.0971	0.41	0.94711	0.83223-1.07786	0.541	0.971	0.88366-1.06697	0.442	0.93055	0.77825-1.11266	0.246	0.93813	0.84566-1.04071	0.0275	0.58928	0.625	13.6988	15	0.54849	13.3935	14	0.4958	5.25473e-280	0.0641795
ebi-a-GCST90002073	12	0.758	1.04268	0.80484-1.3508	0.836	1.02225	0.83033-1.25853	0.544	0.95206	0.81242-1.11570	0.379	0.84926	0.59869-1.20470	0.891	1.01689	0.80475-1.28493	-0.045	0.40427	0.758	6.7372	11	0.81995	5.97885	10	0.81704	0	0.101132
ebi-a-GCST90001852	6	0.7	0.86331	0.43078-1.7301	0.604	0.90757	0.62917-1.30916	0.546	0.91438	0.68385-1.22263	0.913	0.96825	0.55718-1.68261	0.339	0.81241	0.55238-1.19485	0.01774	0.8671	0.621	3.01204	5	0.69813	2.98023	4	0.56114	7.23584e-59	0.0908555
ebi-a-GCST90001480	17	0.724	1.0494	0.80688-1.3648	0.943	0.99185	0.79320-1.24025	0.546	0.94982	0.80351-1.12279	0.965	0.99189	0.69515-1.41531	0.894	0.98518	0.79404-1.22233	-0.03823	0.35027	0.745	12.7564	16	0.69048	11.8269	15	0.69208	2.51453e-125	0.0726983
ebi-a-GCST90001600	5	0.859	2.05604	0.00139-3039.9945	0.426	0.76867	0.40219-1.46913	0.548	0.81206	0.41182-1.60128	0.21	0.42994	0.14172-1.30433	0.486	0.68354	0.25831-1.80877	-0.30463	0.81811	0.163	7.67222	4	0.10435	7.51456	3	0.05719	2.68275e-26	0.117549
ebi-a-GCST90001789	11	0.556	0.87464	0.56935-1.3436	0.48	0.89395	0.65502-1.22003	0.548	0.92869	0.72938-1.18248	0.503	0.85649	0.55302-1.32648	0.444	0.86731	0.61088-1.23138	0.01581	0.7481	0.998	2.15674	10	0.99499	2.04707	9	0.9907	2.37243e-118	0.0905721
ebi-a-GCST90001510	13	0.876	0.98561	0.82536-1.1770	0.928	1.00621	0.87958-1.15106	0.548	0.96289	0.85102-1.08947	0.429	0.91115	0.72904-1.13874	0.438	0.95985	0.86835-1.06099	-0.03179	0.71657	0.098	23.8148	12	0.02155	23.5181	11	0.01493	2.51425e-90	0.0592634
ebi-a-GCST90001934	7	0.408	0.91371	0.75105-1.1116	0.299	0.91899	0.78346-1.07796	0.549	0.95161	0.80911-1.11922	0.835	1.05239	0.66507-1.66527	0.425	0.93803	0.81008-1.08618	0.04231	0.46822	0.429	8.04065	6	0.23514	7.15922	5	0.20907	2.38272e-43	0.0575949
ebi-a-GCST90002047	6	0.393	3.12881	0.30207-32.4075	0.201	0.78161	0.53567-1.14045	0.551	0.91694	0.68957-1.21928	0.381	0.7725	0.45593-1.30887	0.322	0.7725	0.48744-1.22426	-0.29177	0.3584	0.712	2.8705	5	0.71994	1.79559	4	0.77329	2.02184e-33	0.0946968
ebi-a-GCST90001475	11	0.761	0.93912	0.63392-1.3913	0.535	0.92232	0.71429-1.19093	0.554	0.93847	0.76037-1.15829	0.939	1.01429	0.70962-1.44977	0.681	1.06426	0.79742-1.42039	-0.00025	0.99673	0.333	12.2401	10	0.26931	12.24	9	0.20011	3.54911e-91	0.0743592
ebi-a-GCST90001417	14	0.986	0.99695	0.70722-1.4054	0.636	1.0687	0.81135-1.40769	0.554	1.06543	0.86358-1.31446	0.444	1.20342	0.76001-1.90553	0.582	1.08896	0.81002-1.46397	0.02407	0.63394	0.307	16.0674	13	0.24551	15.754	12	0.20277	1.34372e-77	0.0734364
ebi-a-GCST90001529	4	0.222	1.66739	0.94174-2.9522	0.919	1.02209	0.67214-1.55424	0.556	1.1246	0.76050-1.66303	0.569	0.80568	0.41471-1.56524	0.61	0.81145	0.39421-1.67030	-0.13596	0.24205	0.281	4.34345	3	0.22669	1.64325	2	0.43972	8.46495e-23	0.0975821
ebi-a-GCST90001533	11	0.825	1.04065	0.73889-1.4657	0.958	1.00602	0.80424-1.25841	0.557	1.05002	0.89212-1.23588	0.974	0.99409	0.69873-1.41430	0.988	1.0019	0.77909-1.28843	0.00288	0.95475	0.905	4.63751	10	0.91404	4.63411	9	0.86497	1.7937e-113	0.0844989
ebi-a-GCST90001515	9	0.714	1.12994	0.60373-2.1148	0.938	0.98998	0.76804-1.27604	0.557	1.06208	0.86860-1.29865	0.999	0.99987	0.68743-1.45430	0.977	0.99561	0.74790-1.32538	-0.02047	0.84378	0.982	1.92958	8	0.9831	1.88776	7	0.96579	2.22305e-87	0.0923539
ebi-a-GCST90002007	12	0.445	0.96074	0.87033-1.0605	0.734	0.98242	0.88670-1.08847	0.56	0.97682	0.90278-1.05693	0.725	1.02901	0.88112-1.20172	0.634	0.97921	0.90029-1.06505	0.02144	0.59731	0.682	8.43781	11	0.67363	8.14014	10	0.61515	1.00545e-122	0.0544403
ebi-a-GCST90001910	6	0.605	0.95926	0.82949-1.1093	0.634	0.96853	0.84919-1.10464	0.562	0.96571	0.85838-1.08646	0.632	0.93635	0.72710-1.20581	0.726	0.97675	0.86260-1.10601	0.00994	0.87817	0.629	4.25209	5	0.51372	4.22391	4	0.37655	1.90601e-34	0.053285
ebi-a-GCST90001969	11	0.464	1.11369	0.84488-1.4680	0.729	1.04005	0.83302-1.29853	0.562	1.05446	0.88155-1.26128	0.439	1.1545	0.81429-1.63685	0.724	1.03948	0.84377-1.28059	-0.02294	0.61262	0.433	10.9141	10	0.36425	10.5904	9	0.30483	1.08424e-76	0.0683896
ebi-a-GCST90001546	8	0.104	0.51554	0.26144-1.0166	0.901	0.96643	0.56361-1.65714	0.563	0.89498	0.61471-1.30303	0.8	0.8994	0.40751-1.98503	0.837	1.08117	0.52874-2.21078	0.13035	0.10451	0.41	5.93778	7	0.54703	2.28458	6	0.89176	1.00514e-47	0.0898302
ebi-a-GCST90001545	7	0.483	0.78296	0.41539-1.4758	0.945	1.01265	0.70856-1.44725	0.564	1.13238	0.74239-1.72723	0.565	0.87993	0.58282-1.32852	0.912	0.98149	0.71383-1.34953	0.1222	0.20833	0.08	13.9199	6	0.03054	9.82318	5	0.0804	9.88109e-43	0.108786
ebi-a-GCST90002097	7	0.956	0.98855	0.66884-1.4611	0.763	0.96683	0.77686-1.20326	0.566	0.94867	0.79233-1.13586	0.834	0.96355	0.69101-1.34357	0.789	0.96651	0.76173-1.22634	-0.01721	0.82516	0.946	1.708	6	0.9445	1.65381	5	0.89467	1.44256e-75	0.0791107
ebi-a-GCST90001502	21	1	0.99999	0.91756-1.0898	0.852	0.99011	0.89190-1.09913	0.569	0.97997	0.91406-1.05064	0.032	0.80226	0.66495-0.96793	0.479	0.96711	0.88318-1.05901	-0.02561	0.44233	0.687	15.9517	20	0.71962	15.336	19	0.70102	2.32371e-275	0.056925
ebi-a-GCST90001918	9	0.96	0.99456	0.81051-1.2204	0.764	0.97096	0.80074-1.17737	0.569	0.95607	0.81909-1.11596	0.195	0.80325	0.59293-1.08818	0.754	0.97196	0.81866-1.15396	-0.03058	0.58189	0.865	3.52836	8	0.89698	3.19521	7	0.86638	5.92214e-47	0.0574443
ebi-a-GCST90001520	12	0.663	0.95784	0.79347-1.1563	0.25	0.89771	0.74688-1.07900	0.569	0.96317	0.84638-1.09608	0.835	0.96543	0.69882-1.33375	0.431	0.92876	0.77781-1.10900	0.00373	0.93533	0.35	12.0538	11	0.35962	12.0454	10	0.28203	4.13574e-80	0.0637962
ebi-a-GCST90001746	13	0.204	1.33697	0.87717-2.0378	0.506	1.12856	0.79007-1.61207	0.569	1.07326	0.84123-1.36929	0.775	1.08001	0.64498-1.80845	0.568	1.10095	0.79859-1.51779	-0.06665	0.23652	0.675	9.93517	12	0.62165	8.36753	11	0.68005	3.01565e-79	0.0797877
ebi-a-GCST90001970	11	0.105	1.20563	0.98360-1.4778	0.459	1.08049	0.88045-1.32600	0.57	1.04695	0.89367-1.22651	0.561	1.1023	0.80240-1.51427	0.462	1.07777	0.88973-1.30554	-0.08662	0.07233	0.428	10.9154	10	0.36414	6.77343	9	0.66069	3.58166e-134	0.0736965
ebi-a-GCST90001469	11	0.07	1.21261	1.00909-1.4572	0.404	1.06927	0.91348-1.25162	0.573	1.04451	0.89773-1.21528	0.452	1.09156	0.87669-1.35908	0.54	1.04917	0.90447-1.21703	-0.11807	0.05329	0.2	15.2901	10	0.12184	9.86995	9	0.36112	9.34632e-267	0.0840278
ebi-a-GCST90001506	8	0.07	0.68682	0.49188-0.9590	0.275	0.851	0.63685-1.13716	0.574	0.90958	0.65339-1.26623	0.857	1.05766	0.58720-1.90506	0.209	0.82296	0.62462-1.08429	0.13781	0.04693	0.099	16.0963	7	0.02425	7.90454	6	0.24518	6.30814e-54	0.0837373
ebi-a-GCST90001431	12	0.644	1.19478	0.57439-2.4852	0.773	1.06587	0.69070-1.64482	0.575	0.91173	0.66016-1.25915	0.729	1.10234	0.64407-1.88670	0.707	1.09019	0.70254-1.69176	-0.06687	0.43719	0.517	11.0412	11	0.43982	10.3626	10	0.40928	7.43487e-64	0.0854323
ebi-a-GCST90001897	10	0.97	0.99654	0.83569-1.1883	0.612	0.96046	0.82199-1.12225	0.576	0.96128	0.83707-1.10393	0.988	1.0029	0.70024-1.43636	0.696	0.96838	0.82849-1.13190	-0.02514	0.53466	0.884	5.38964	9	0.79911	4.96874	8	0.76091	7.84751e-62	0.0579339
ebi-a-GCST90001877	10	0.799	1.02678	0.84340-1.2500	0.556	0.96266	0.84812-1.09266	0.577	0.96502	0.85148-1.09369	0.949	1.00962	0.75983-1.34151	0.718	0.97815	0.87081-1.09872	-0.04333	0.44029	0.256	14.7963	9	0.09669	13.6697	8	0.09079	1.04214e-62	0.0641438
ebi-a-GCST90001735	12	0.79	1.10607	0.53666-2.2796	0.974	1.0064	0.68937-1.46922	0.581	1.09381	0.79525-1.50446	0.953	0.98342	0.56834-1.70166	0.71	1.09227	0.69437-1.71819	-0.00285	0.97349	0.142	16.2983	11	0.13041	16.2964	10	0.09146	2.38955e-67	0.0925467
ebi-a-GCST90001990	14	0.735	0.92725	0.60433-1.4227	0.308	0.84819	0.61812-1.16390	0.584	0.93158	0.72282-1.20063	0.657	0.88742	0.53037-1.48483	0.314	0.85898	0.64647-1.14135	0.00128	0.97881	0.242	17.6864	13	0.1698	17.6853	12	0.12559	2.20678e-91	0.080329
ebi-a-GCST90001941	6	0.332	0.71905	0.40037-1.2914	0.204	0.75161	0.48381-1.16764	0.585	0.90804	0.64208-1.28416	0.823	0.92695	0.49283-1.74347	0.382	0.80493	0.51651-1.25439	0.07515	0.38736	0.635	3.2374	5	0.66344	2.29817	4	0.6811	9.23469e-36	0.0725043
ebi-a-GCST90001963	14	0.498	0.95752	0.84779-1.0815	0.419	0.947	0.82986-1.08069	0.589	0.97492	0.88912-1.06900	0.634	1.05694	0.84612-1.32030	0.342	0.93651	0.82212-1.06682	0.01822	0.65086	0.288	14.3919	13	0.34683	14.1381	12	0.29198	3.27954e-118	0.0561918
ebi-a-GCST90001657	7	0.332	1.34644	0.78206-2.3181	0.578	1.1393	0.71943-1.80422	0.589	1.10471	0.76961-1.58573	0.624	1.17131	0.64301-2.13369	0.61	1.13761	0.71084-1.82061	-0.06627	0.38288	0.899	2.67373	6	0.84854	1.75938	5	0.88134	7.39184e-37	0.080324
ebi-a-GCST90001669	18	0.743	0.99133	0.94185-1.0434	0.694	0.98956	0.93913-1.04270	0.59	0.98783	0.94485-1.03277	0.186	0.91473	0.80590-1.03825	0.511	0.98512	0.94295-1.02918	-0.00957	0.76761	0.483	18.9264	17	0.33277	18.8202	16	0.2781	1.40328e-121	0.0512898
ebi-a-GCST90001685	8	0.688	0.71005	0.14456-3.4876	0.888	1.03464	0.64286-1.66517	0.593	0.89733	0.60348-1.33427	0.561	1.32413	0.53746-3.26219	0.554	1.32413	0.54564-3.21330	0.03998	0.77492	0.236	9.24758	7	0.23537	9.11168	6	0.16739	7.1357e-44	0.0851477
ebi-a-GCST90001832	8	0.81	1.06018	0.67153-1.6738	0.71	1.05892	0.78314-1.43182	0.593	1.07105	0.83291-1.37729	0.542	1.14201	0.76070-1.71445	0.731	1.05957	0.77156-1.45507	0.00324	0.95834	0.453	7.89638	7	0.34182	7.89248	6	0.24609	8.33676e-68	0.0800332
ebi-a-GCST90001511	14	0.41	1.05626	0.93149-1.1977	0.501	1.04388	0.92102-1.18312	0.593	1.02966	0.92488-1.14630	0.726	1.05765	0.77860-1.43670	0.486	1.04135	0.93221-1.16327	-0.02918	0.45983	0.998	2.79449	13	0.99858	2.21134	12	0.99901	3.02903e-107	0.0566674
ebi-a-GCST90001483	19	0.223	0.90356	0.77221-1.0573	0.869	0.98627	0.83659-1.16273	0.594	0.96928	0.86430-1.08701	0.505	0.90931	0.69130-1.19608	0.588	0.94949	0.78981-1.14144	0.05866	0.21737	0.73	14.3141	18	0.7084	12.673	17	0.75779	2.07066e-264	0.0659594
ebi-a-GCST90001893	10	0.743	1.14605	0.52208-2.5158	0.124	0.70676	0.45436-1.09937	0.596	0.90617	0.62983-1.30375	0.308	0.68075	0.33913-1.36651	0.253	0.68991	0.38032-1.25150	-0.05056	0.52393	0.216	12.0667	9	0.20958	11.4322	8	0.17839	4.17637e-52	0.0906748
ebi-a-GCST90001584	9	0.951	0.9802	0.52892-1.8165	0.265	0.80794	0.55543-1.17524	0.596	0.91963	0.67474-1.25340	0.631	0.87638	0.52205-1.47120	0.522	0.87638	0.59548-1.28978	-0.01697	0.8174	0.453	8.74032	8	0.36467	8.66914	7	0.27729	1.43237e-87	0.089773
ebi-a-GCST90002056	15	0.209	0.81758	0.60667-1.1018	0.783	0.9677	0.76583-1.22278	0.601	0.95344	0.79735-1.14009	0.586	0.90553	0.63874-1.28376	0.378	0.89501	0.70503-1.13617	0.0515	0.22933	0.569	13.3334	14	0.50045	11.7423	13	0.54888	4.04599e-107	0.0694382
ebi-a-GCST90001994	5	0.519	0.932	0.77103-1.1266	0.744	1.02875	0.86764-1.21977	0.603	1.05574	0.86057-1.29518	0.992	1.00222	0.68050-1.47604	0.833	1.01935	0.86263-1.20453	0.10877	0.11972	0.403	7.22333	4	0.12455	2.56343	3	0.46394	6.75458e-28	0.0562141
ebi-a-GCST90001463	12	0.148	1.20454	0.95477-1.5196	0.459	1.08195	0.87826-1.33289	0.604	1.04584	0.88300-1.23871	0.795	1.05244	0.72204-1.53403	0.418	1.08568	0.89629-1.31509	-0.06845	0.11374	0.544	11.0668	11	0.43768	8.06313	10	0.62267	2.02998e-220	0.0808112
ebi-a-GCST90001813	14	0.623	0.92131	0.67042-1.2661	0.942	0.98958	0.74729-1.31044	0.604	0.94585	0.76644-1.16725	0.815	1.0461	0.72275-1.51411	0.996	0.99917	0.74885-1.33317	0.01288	0.82725	0.155	18.489	13	0.13982	18.4127	12	0.10372	1.17027e-116	0.0734535
ebi-a-GCST90001633	18	0.387	1.15017	0.84483-1.5659	0.325	0.86963	0.65848-1.14849	0.604	0.95067	0.78528-1.15089	0.332	0.78596	0.48976-1.26129	0.387	0.81505	0.51889-1.28027	-0.06268	0.1427	0.613	13.1864	17	0.72362	10.8096	16	0.82108	4.97774e-139	0.0726567
ebi-a-GCST90001960	9	0.55	0.9603	0.84621-1.0898	0.742	0.97858	0.86040-1.11300	0.605	1.03451	0.90978-1.17633	0.799	1.04507	0.75280-1.45081	0.937	1.00421	0.90804-1.11056	0.1212	0.06898	0.365	14.4265	8	0.0713	8.70046	7	0.27488	3.11484e-50	0.0552341
ebi-a-GCST90001988	11	0.454	1.11887	0.84438-1.4826	0.414	1.07199	0.90745-1.26635	0.609	1.03695	0.90229-1.19171	0.476	0.90662	0.69936-1.17531	0.431	1.06516	0.91611-1.23845	-0.03402	0.55759	0.926	4.14421	10	0.94061	3.77334	9	0.92569	4.87623e-279	0.0728285
ebi-a-GCST90002038	10	0.966	1.00679	0.74188-1.3663	0.467	1.07398	0.88623-1.30150	0.611	1.0506	0.86883-1.27041	0.782	0.95738	0.70973-1.29144	0.541	1.06225	0.88162-1.27988	0.02198	0.72692	0.284	13.2574	9	0.1513	13.044	8	0.11034	6.25782e-70	0.0657003
ebi-a-GCST90001568	6	0.695	0.45769	0.01216-17.2220	0.955	1.01723	0.56255-1.83938	0.611	1.1595	0.65532-2.05158	0.839	1.11422	0.41341-3.00305	0.861	1.08208	0.46761-2.50400	0.13609	0.63711	0.272	7.42773	5	0.19072	6.97478	4	0.13723	9.19736e-34	0.116198
ebi-a-GCST90001917	11	0.481	0.95881	0.85712-1.0726	0.21	0.91901	0.80525-1.04885	0.613	0.97424	0.88064-1.07779	0.768	1.04593	0.78278-1.39754	0.239	0.92838	0.82648-1.04283	0.0218	0.53639	0.47	9.0472	10	0.52763	8.63402	9	0.47172	6.93443e-58	0.0531184
ebi-a-GCST90001873	6	0.718	0.86076	0.40280-1.8394	0.421	0.90518	0.71021-1.15368	0.613	0.94855	0.77278-1.16429	0.593	0.90426	0.63987-1.27788	0.492	0.89297	0.66200-1.20454	0.03175	0.80748	0.927	1.44692	5	0.91911	1.37916	4	0.84781	3.16239e-41	0.0705768
ebi-a-GCST90001435	11	0.233	0.90816	0.78345-1.0527	0.293	0.93507	0.82515-1.05962	0.616	0.96677	0.84725-1.10316	0.866	1.0244	0.78046-1.34458	0.514	0.96284	0.86271-1.07460	0.07734	0.16124	0.182	18.3466	10	0.04939	14.5735	9	0.10334	1.9455e-56	0.0544395
ebi-a-GCST90001974	9	0.835	0.96382	0.69002-1.3463	0.584	0.93852	0.74768-1.17808	0.616	0.93713	0.72705-1.20793	0.613	1.12572	0.72468-1.74871	0.599	0.94202	0.76049-1.16687	-0.01376	0.78818	0.273	13.8535	8	0.08566	13.701	7	0.05676	2.94713e-48	0.0658431
ebi-a-GCST90001931	4	0.791	1.96058	0.02476-155.2554	0.87	1.05637	0.54830-2.03526	0.618	1.16039	0.64626-2.08353	1	1.00003	0.35082-2.85060	0.865	0.91131	0.34045-2.43937	-0.089	0.83386	0.291	4.09453	3	0.25144	3.9815	2	0.13659	1.98752e-21	0.0981259
ebi-a-GCST90001679	9	0.298	0.79367	0.53029-1.1879	0.966	0.99218	0.69273-1.42107	0.62	0.93868	0.73103-1.20532	0.845	1.06949	0.55836-2.04851	0.107	0.67511	0.44163-1.03202	0.0612	0.33309	0.521	5.65507	8	0.68581	4.57427	7	0.71176	1.38555e-49	0.0649885
ebi-a-GCST90001559	7	0.756	0.93322	0.61798-1.4092	0.629	1.06418	0.82703-1.36933	0.621	0.93442	0.71430-1.22236	0.988	1.00377	0.62106-1.62231	0.565	1.07773	0.84708-1.37118	0.0007	0.99336	0.291	10.6944	6	0.09829	10.6942	5	0.05779	1.80753e-43	0.0641565
ebi-a-GCST90001392	18	0.178	1.14317	0.94885-1.3773	0.118	1.18306	0.95817-1.46073	0.621	1.03954	0.89127-1.21248	0.773	1.06401	0.70213-1.61240	0.135	1.14818	0.96607-1.36460	-0.06204	0.12344	0.334	18.7672	17	0.34206	16.1054	16	0.44563	1.77924e-99	0.0607374
ebi-a-GCST90001811	11	0.376	1.21163	0.80862-1.8155	0.782	0.9507	0.66448-1.36022	0.623	0.93487	0.71474-1.22279	0.947	1.02059	0.56693-1.83727	0.972	0.99086	0.60090-1.63387	-0.06695	0.14322	0.329	11.4235	10	0.32549	8.85138	9	0.4511	1.116e-70	0.0711068
ebi-a-GCST90001954	11	0.703	1.03753	0.86361-1.2465	0.832	1.01175	0.90804-1.12730	0.624	1.02632	0.92499-1.13875	0.431	1.14545	0.82839-1.58386	0.825	1.01269	0.90845-1.12890	-0.00895	0.89111	0.674	7.52679	10	0.67495	7.50696	9	0.58449	0	0.0749289
ebi-a-GCST90001434	8	0.731	1.05926	0.77444-1.4488	0.953	1.00796	0.77556-1.30999	0.624	0.94672	0.76040-1.17869	0.969	0.98905	0.57859-1.69069	0.884	1.02018	0.78836-1.32018	-0.04338	0.36311	0.551	6.10558	7	0.52748	5.13731	6	0.52633	5.33837e-52	0.0603412
ebi-a-GCST90001947	13	0.933	0.99294	0.84420-1.1679	0.988	1.00082	0.90130-1.11134	0.625	0.9754	0.88272-1.07781	0.981	1.00358	0.75480-1.33436	0.921	0.99488	0.90065-1.09897	-0.01287	0.7845	0.345	15.4679	12	0.21684	15.3583	11	0.16668	0	0.0730532
ebi-a-GCST90001783	10	0.336	1.70747	0.61277-4.7579	0.68	1.08066	0.74750-1.56231	0.629	1.07303	0.80583-1.42883	0.966	1.0125	0.58196-1.76154	0.489	1.1893	0.74295-1.90382	-0.0841	0.38187	0.977	2.52588	9	0.98018	1.66967	8	0.98952	1.40087e-79	0.0792448
ebi-a-GCST90001561	16	0.86	0.99075	0.89514-1.0966	0.88	0.9924	0.89876-1.09580	0.631	0.97878	0.89664-1.06844	0.404	0.89973	0.70675-1.14541	0.741	0.98362	0.89348-1.08286	-0.01808	0.64845	0.941	8.42475	15	0.90563	8.20768	14	0.87823	1.9706e-111	0.0535743
ebi-a-GCST90002035	15	0.588	0.89733	0.61235-1.3150	0.529	1.09781	0.82093-1.46805	0.634	1.05269	0.85190-1.30081	0.169	1.43741	0.88051-2.34654	0.429	1.16593	0.80566-1.68730	0.04577	0.34301	0.369	15.2754	14	0.35959	14.2162	13	0.35879	9.28378e-136	0.0812806
ebi-a-GCST90002108	11	0.596	1.12922	0.73214-1.7417	0.64	1.04418	0.87129-1.25138	0.636	0.96309	0.82427-1.12530	0.327	0.83338	0.58931-1.17854	0.567	1.05486	0.88379-1.25905	-0.07081	0.45896	0.258	12.1929	10	0.27236	11.4325	9	0.24722	5.01024e-148	0.076493
ebi-a-GCST90001648	6	0.62	0.90149	0.61706-1.3170	0.592	0.92744	0.70394-1.22190	0.636	0.93999	0.72732-1.21485	0.77	0.92932	0.58298-1.48140	0.642	0.92932	0.69501-1.24261	0.01588	0.78361	0.838	2.92502	5	0.71154	2.83877	4	0.58516	1.92503e-171	0.0908172
ebi-a-GCST90002044	6	0.995	1.00278	0.41755-2.4083	0.687	1.08551	0.72871-1.61699	0.638	1.07456	0.79608-1.45048	0.621	1.14749	0.68714-1.91623	0.67	1.11457	0.69689-1.78259	0.01583	0.87622	0.565	4.52771	5	0.47619	4.49673	4	0.34294	3.48894e-31	0.0760362
ebi-a-GCST90001840	12	0.702	0.9123	0.57812-1.4397	0.785	1.04592	0.75813-1.44295	0.639	1.05629	0.84019-1.32797	0.842	1.04616	0.67836-1.61339	0.891	1.02336	0.74201-1.41138	0.03991	0.48328	0.526	10.544	11	0.48222	10.0132	10	0.43934	2.60805e-68	0.0687213
ebi-a-GCST90001753	13	0.673	1.13402	0.64231-2.0021	0.897	0.9752	0.66685-1.42613	0.64	1.06506	0.81806-1.38663	0.876	0.95508	0.54258-1.68118	0.692	0.91834	0.60888-1.38508	-0.01481	0.80939	0.466	11.9899	12	0.4465	11.9237	11	0.36941	1.80969e-75	0.0724226
ebi-a-GCST90001638	16	0.704	0.91632	0.58959-1.4241	0.485	1.12274	0.81136-1.55363	0.64	1.0562	0.84005-1.32795	0.461	0.82455	0.50047-1.35851	0.879	0.97433	0.70176-1.35276	0.04169	0.46968	0.502	15.2816	15	0.43133	14.7016	14	0.39885	2.13847e-137	0.0791246
ebi-a-GCST90001517	18	0.415	1.04853	0.93840-1.1716	0.365	1.06245	0.93182-1.21138	0.641	1.02144	0.93431-1.11668	0.417	1.10074	0.87784-1.38026	0.273	1.07386	0.94934-1.21470	-0.02098	0.44871	0.635	13.2942	17	0.71628	12.6911	16	0.6952	4.53129e-124	0.0567756
ebi-a-GCST90001807	7	0.529	0.61224	0.14767-2.5383	0.725	1.10297	0.63946-1.90247	0.643	1.10616	0.72215-1.69439	0.762	1.13201	0.52655-2.43362	0.792	1.09707	0.56753-2.12071	0.09733	0.43182	0.553	5.19634	6	0.51889	4.46604	5	0.48444	5.58622e-39	0.0811948
ebi-a-GCST90001950	9	0.545	1.09927	0.82139-1.4711	0.918	1.00745	0.87499-1.15996	0.644	1.03681	0.88960-1.20838	0.75	0.95583	0.73048-1.25070	0.954	1.00478	0.85878-1.17562	-0.02887	0.65114	0.308	12.0056	8	0.15095	11.635	7	0.11322	1.07735e-124	0.0776429
ebi-a-GCST90002091	11	0.465	0.93383	0.78327-1.1133	0.608	0.96316	0.83452-1.11162	0.644	1.02954	0.90984-1.16499	0.946	0.99089	0.76583-1.28209	0.56	0.96192	0.84801-1.09114	0.06589	0.1786	0.292	12.5886	10	0.24759	10.181	9	0.33603	6.23415e-129	0.0647513
ebi-a-GCST90001999	12	0.432	1.2596	0.72506-2.1882	0.864	1.02491	0.77322-1.35852	0.648	1.06509	0.81268-1.39588	0.412	1.22113	0.77130-1.93331	0.951	1.00891	0.76635-1.32825	-0.05887	0.50696	0.072	19.3193	11	0.0556	18.4456	10	0.0479	2.81965e-143	0.0913846
ebi-a-GCST90001961	11	0.24	1.27044	0.87512-1.8443	0.152	1.1281	0.95662-1.33033	0.649	1.04721	0.85866-1.27717	0.446	0.7973	0.45538-1.39596	0.243	1.12	0.93657-1.33937	-0.10894	0.26412	0.295	16.2871	10	0.0917	14.0696	9	0.11987	0	0.0999657
ebi-a-GCST90001874	13	0.725	0.94532	0.69646-1.2831	0.736	0.96524	0.78585-1.18557	0.65	1.03535	0.89108-1.20298	0.495	0.88981	0.64306-1.23123	0.583	0.91946	0.68693-1.23072	0.03848	0.51667	0.938	5.66599	12	0.93197	5.21708	11	0.9202	1.29474e-74	0.0666475
ebi-a-GCST90001650	12	0.846	0.96409	0.67343-1.3802	0.613	0.93573	0.72340-1.21038	0.651	0.95032	0.76229-1.18473	0.735	0.92571	0.59899-1.43061	0.631	0.93357	0.71058-1.22653	-0.00451	0.92021	0.478	11.9939	11	0.3641	11.9812	10	0.28632	6.74709e-213	0.0837655
ebi-a-GCST90001589	6	0.605	1.20905	0.62257-2.3480	0.931	0.98059	0.63025-1.52568	0.651	0.91257	0.61373-1.35692	0.294	0.64277	0.30702-1.34569	0.698	1.08774	0.72799-1.62526	-0.0917	0.36019	0.252	8.01021	5	0.15567	6.32473	4	0.17617	5.55591e-31	0.0668603
ebi-a-GCST90001513	12	0.109	1.34761	0.96705-1.8779	0.676	1.06159	0.80207-1.40508	0.653	1.04761	0.85520-1.28330	0.429	0.81162	0.49296-1.33626	0.866	1.02242	0.79511-1.31471	-0.10872	0.08994	0.53	11.0528	11	0.43885	7.52901	10	0.67474	8.71042e-62	0.0605171
ebi-a-GCST90001564	5	0.736	1.19713	0.46075-3.1104	0.385	0.82635	0.53712-1.27132	0.654	0.92574	0.66095-1.29662	0.557	0.82635	0.46080-1.48190	0.462	0.815	0.49781-1.33429	-0.11248	0.61215	0.628	2.65469	4	0.61717	2.33657	3	0.50555	5.12789e-26	0.060548
ebi-a-GCST90001628	20	0.391	1.07424	0.91558-1.2604	0.578	1.04622	0.89235-1.22662	0.654	1.02763	0.91203-1.15788	0.511	0.90711	0.68214-1.20628	0.691	1.02785	0.89967-1.17430	-0.0251	0.41917	0.37	21.5034	19	0.30966	20.7166	18	0.29395	6.12992e-178	0.0589221
ebi-a-GCST90002086	12	0.67	0.88522	0.51407-1.5243	0.878	0.9714	0.66967-1.40908	0.654	0.93559	0.69897-1.25232	0.58	1.17594	0.67351-2.05316	0.752	1.07137	0.70592-1.62601	0.01591	0.81436	0.327	12.8529	11	0.30305	12.7787	10	0.23631	7.02507e-64	0.0721175
ebi-a-GCST90001476	5	0.394	2.16408	0.47100-9.9432	0.48	1.15443	0.77527-1.71901	0.656	1.07572	0.78058-1.48246	0.929	0.97693	0.60502-1.57744	0.552	1.14097	0.76552-1.70056	-0.15556	0.42587	0.754	1.79247	4	0.77386	0.9479	3	0.81386	3.19785e-44	0.067884
ebi-a-GCST90002064	5	0.932	1.03881	0.46165-2.3376	0.613	1.12573	0.71181-1.78036	0.656	1.09497	0.73424-1.63292	0.589	1.21757	0.63049-2.35130	0.632	1.17871	0.63241-2.19691	0.01198	0.89302	0.945	0.61439	4	0.96145	0.59301	3	0.89803	2.25617e-29	0.0725852
ebi-a-GCST90002095	12	0.52	1.25738	0.64180-2.4634	0.441	1.11225	0.84841-1.45814	0.657	1.05726	0.82707-1.35151	0.723	1.08392	0.70220-1.67315	0.695	1.06869	0.77319-1.47713	-0.05412	0.59732	0.096	18.573	11	0.0692	18.0361	10	0.05436	1.4545e-83	0.0909007
ebi-a-GCST90001672	17	0.82	0.97494	0.78628-1.2089	0.762	1.03167	0.84347-1.26185	0.658	0.96673	0.83226-1.12293	0.653	1.07156	0.79755-1.43971	0.975	1.00298	0.83429-1.20578	-0.00535	0.91593	0.852	10.9543	16	0.8123	10.9427	15	0.75664	9.12911e-260	0.0684288
ebi-a-GCST90001818	7	0.848	1.17312	0.24809-5.5471	0.557	1.20988	0.64081-2.28429	0.658	1.15128	0.61661-2.14957	0.407	1.41855	0.65734-3.06123	0.496	1.30713	0.63346-2.69722	-0.00308	0.97996	0.13	10.975	6	0.08915	10.9734	5	0.05191	4.20485e-39	0.115384
ebi-a-GCST90001632	14	0.596	1.12061	0.74420-1.6874	0.628	1.09342	0.76217-1.56864	0.658	1.0582	0.82353-1.35974	0.265	0.73642	0.43997-1.23260	0.708	1.07877	0.73190-1.59004	-0.01628	0.73447	0.919	7.27455	13	0.88745	7.15401	12	0.84727	3.90596e-91	0.0711791
ebi-a-GCST90001670	14	0.308	0.81653	0.56205-1.1862	0.89	1.02123	0.75896-1.37414	0.659	0.95231	0.76652-1.18313	0.624	1.1183	0.72320-1.72927	0.741	1.05329	0.77969-1.42288	0.05925	0.34078	0.743	10.2593	13	0.6726	9.27526	12	0.67926	7.32134e-233	0.0846905
ebi-a-GCST90001785	17	0.599	1.13375	0.71723-1.7922	0.811	1.04719	0.71705-1.52933	0.661	1.05837	0.82156-1.36344	0.421	0.75588	0.38929-1.46770	0.944	1.01589	0.65705-1.57072	-0.01748	0.72527	0.279	18.944	16	0.27158	18.7834	15	0.22372	1.53615e-105	0.0749284
ebi-a-GCST90001790	12	0.458	0.84712	0.55576-1.2912	0.781	1.04344	0.77358-1.40745	0.661	1.05057	0.84243-1.31014	0.594	0.87548	0.54428-1.40821	0.475	1.14293	0.80202-1.62876	0.06002	0.26719	0.827	6.06907	11	0.86872	4.68827	10	0.91101	5.52649e-120	0.0706123
ebi-a-GCST90002117	14	0.955	1.00974	0.72480-1.4067	0.87	0.98188	0.78843-1.22279	0.663	0.96175	0.80718-1.14593	0.981	1.00373	0.73921-1.36292	0.976	1.00373	0.78821-1.27818	-0.01545	0.74044	0.94	7.12702	13	0.89549	7.01207	12	0.85681	1.76156e-190	0.0710859
ebi-a-GCST90001837	9	0.825	1.06556	0.61905-1.8341	0.589	1.07333	0.83046-1.38724	0.664	1.04745	0.84991-1.29089	0.951	0.98498	0.61658-1.57349	0.922	1.01906	0.70737-1.46809	-0.00571	0.94777	0.327	9.80326	8	0.27911	9.7968	7	0.20038	6.29695e-50	0.0712419
ebi-a-GCST90001525	17	0.629	1.0648	0.82971-1.3665	0.566	1.06804	0.85312-1.33711	0.665	1.03224	0.89411-1.19172	0.754	1.05558	0.75718-1.47158	0.647	1.06115	0.82693-1.36172	-0.01221	0.76947	0.695	12.7764	16	0.68903	12.6873	15	0.62643	6.68618e-110	0.0639085
ebi-a-GCST90001920	9	0.963	0.99114	0.69211-1.4193	0.577	0.9158	0.67238-1.24734	0.665	1.05502	0.82771-1.34475	0.569	1.16043	0.70978-1.89719	0.576	0.90324	0.64137-1.27205	0.02311	0.65779	0.839	3.60954	8	0.89052	3.39568	7	0.84615	3.66611e-56	0.0639391
ebi-a-GCST90001921	11	0.707	0.95797	0.77097-1.1903	0.839	1.02177	0.82957-1.25851	0.668	0.96494	0.81958-1.13608	0.656	1.09348	0.74635-1.60205	0.777	1.03037	0.84237-1.26033	0.00367	0.92308	0.833	5.15949	10	0.88027	5.14963	9	0.82107	1.2087e-59	0.0559973
ebi-a-GCST90001899	10	0.958	0.97728	0.42515-2.2464	0.6	0.889	0.57301-1.37926	0.669	1.07234	0.77849-1.47710	0.375	1.50918	0.63651-3.57833	0.498	0.82501	0.48361-1.40739	0.02012	0.81691	0.316	10.3736	9	0.32109	10.2999	8	0.2446	4.83594e-74	0.0834846
ebi-a-GCST90001930	11	0.266	0.83141	0.61262-1.1283	0.325	0.86673	0.65198-1.15223	0.669	0.95566	0.77600-1.17691	0.951	0.98171	0.55095-1.74929	0.311	0.86539	0.66371-1.12835	0.04574	0.25267	0.446	9.92818	10	0.44682	8.43437	9	0.49103	2.0498e-58	0.0599367
ebi-a-GCST90001516	7	0.318	1.34207	0.79743-2.2587	0.653	1.07088	0.79472-1.44300	0.67	1.05197	0.83346-1.32776	0.883	1.03186	0.69122-1.54038	0.639	1.09282	0.76841-1.55419	-0.07331	0.35227	0.635	4.46418	6	0.61412	3.41307	5	0.63658	6.22171e-47	0.066632
ebi-a-GCST90002024	10	0.351	1.51199	0.66733-3.4258	0.925	1.01514	0.74127-1.39020	0.67	0.94661	0.73540-1.21847	0.843	1.05742	0.61736-1.81116	0.789	1.07345	0.64811-1.77794	-0.09998	0.27292	0.382	10.0328	9	0.34784	8.55128	8	0.38155	4.2543e-68	0.0667742
ebi-a-GCST90001630	14	0.823	1.07333	0.58507-1.9691	0.917	0.97911	0.65725-1.45858	0.671	0.94139	0.71236-1.24405	0.855	1.06521	0.54701-2.07430	0.949	1.02055	0.55446-1.87846	-0.02408	0.64194	0.829	8.2727	13	0.82539	8.04519	12	0.78159	1.27064e-93	0.0721693
ebi-a-GCST90001586	13	0.521	0.96018	0.85160-1.0826	0.844	0.99003	0.89570-1.09429	0.671	0.97752	0.88009-1.08574	0.892	1.02866	0.68921-1.53531	0.911	0.99497	0.91207-1.08540	0.02624	0.52341	0.396	18.0711	12	0.11355	17.3847	11	0.097	7.46933e-127	0.0543353
ebi-a-GCST90001512	12	0.824	0.98268	0.84593-1.1415	0.541	1.04615	0.90534-1.20888	0.672	1.02666	0.90908-1.15944	0.83	1.03393	0.76828-1.39142	0.817	1.01474	0.89930-1.14501	0.04395	0.3486	0.314	14.1795	11	0.22322	12.9291	10	0.22766	5.77333e-86	0.0544672
ebi-a-GCST90001732	11	0.898	0.9643	0.56215-1.6541	0.982	0.99506	0.65015-1.52296	0.675	1.06931	0.78184-1.46249	0.854	0.94498	0.52615-1.69723	0.907	0.97186	0.61074-1.54650	0.02474	0.65232	0.54	9.60068	10	0.4762	9.37454	9	0.40344	3.15487e-55	0.0687807
ebi-a-GCST90001763	8	0.981	1.0123	0.37860-2.7067	0.686	1.08962	0.71841-1.65265	0.679	1.06475	0.79123-1.43284	0.891	0.95326	0.49399-1.83952	0.496	1.25432	0.67577-2.32818	0.01008	0.9189	0.422	6.66643	7	0.46442	6.65392	6	0.35404	1.26285e-61	0.0680922
ebi-a-GCST90001743	14	0.157	1.60946	0.86737-2.9865	0.637	1.07554	0.79451-1.45596	0.682	1.0528	0.82326-1.34635	0.864	1.04354	0.64745-1.68195	0.549	1.13919	0.75223-1.72520	-0.09573	0.17106	0.172	18.2081	13	0.14978	15.4745	12	0.21651	8.73091e-94	0.0681818
ebi-a-GCST90001826	14	0.781	1.06132	0.70401-1.6000	0.35	1.10914	0.89246-1.37843	0.682	1.04584	0.84402-1.29590	0.92	1.02105	0.68606-1.51961	0.371	1.10013	0.89886-1.34648	-0.00513	0.93474	0.226	18.8365	13	0.12826	18.8256	12	0.09283	5.41731e-179	0.0746074
ebi-a-GCST90001606	6	0.905	0.90897	0.20709-3.9898	0.688	1.14536	0.59112-2.21926	0.682	0.8788	0.47360-1.63067	0.492	1.54392	0.48931-4.87147	0.467	1.53054	0.52974-4.42211	-0.00647	0.96208	0.172	8.30625	5	0.14015	8.30094	4	0.08116	5.73683e-31	0.0825378
ebi-a-GCST90002052	4	0.373	1.25058	0.85084-1.8381	0.527	1.05969	0.88539-1.26831	0.683	1.03344	0.88273-1.20987	0.834	1.02656	0.81932-1.28622	0.57	1.06298	0.88051-1.28325	-0.11807	0.39888	0.688	1.92689	3	0.58772	0.79531	2	0.67189	1.82589e-71	0.0617975
ebi-a-GCST90001815	10	0.969	1.00336	0.85029-1.1840	0.436	0.94427	0.81749-1.09070	0.688	0.97348	0.85368-1.11009	0.342	0.83571	0.58873-1.18632	0.536	0.95924	0.84505-1.08886	-0.03982	0.54771	0.388	11.8356	9	0.22274	11.2801	8	0.18633	1.16922e-85	0.0541534
ebi-a-GCST90001471	9	0.541	1.0875	0.84202-1.4045	0.957	1.00561	0.81886-1.23496	0.691	0.96245	0.79709-1.16213	0.793	0.9561	0.69167-1.32164	0.921	1.01014	0.83205-1.22634	-0.06568	0.22851	0.363	10.6551	8	0.22202	8.53268	7	0.28797	4.80197e-94	0.0596853
ebi-a-GCST90002111	12	0.989	1.00267	0.69954-1.4371	0.53	0.93677	0.76384-1.14885	0.693	0.96814	0.82454-1.13675	0.728	0.94369	0.68655-1.29714	0.605	0.93289	0.72229-1.20491	-0.01326	0.83355	0.226	13.9834	11	0.23391	13.9187	10	0.17673	4.46474e-109	0.0649992
ebi-a-GCST90001693	15	0.47	1.03804	0.94087-1.1452	0.303	1.04533	0.96082-1.13728	0.694	1.01709	0.93468-1.10677	0.467	0.89338	0.66468-1.20076	0.442	1.03084	0.95610-1.11144	-0.03716	0.42486	0.271	23.1331	14	0.05814	21.9852	13	0.05559	8.56529e-100	0.0521392
ebi-a-GCST90001452	9	0.816	1.02806	0.82104-1.2873	0.634	0.95244	0.77951-1.16373	0.696	0.97011	0.83316-1.12956	0.221	0.82248	0.61616-1.09788	0.827	0.97914	0.81508-1.17621	-0.05144	0.51419	0.653	6.45768	8	0.59611	5.9857	7	0.54142	9.57741e-50	0.0537143
ebi-a-GCST90002002	8	0.885	1.0422	0.60873-1.7843	0.258	1.29687	0.82686-2.03406	0.698	1.06912	0.76301-1.49803	0.374	1.40542	0.69650-2.83590	0.296	1.36826	0.79361-2.35902	0.00732	0.90889	0.685	4.35492	7	0.73811	4.34067	6	0.63068	1.75121e-40	0.0636414
ebi-a-GCST90001676	4	0.591	0.57972	0.10732-3.1316	0.911	1.03572	0.55921-1.91828	0.699	1.11078	0.65237-1.89132	0.923	0.95409	0.39627-2.29715	0.9	0.9428	0.40618-2.18835	0.09388	0.50937	0.752	1.26061	3	0.73851	0.62652	2	0.73106	3.57909e-22	0.0713911
ebi-a-GCST90001577	16	0.67	1.07955	0.76483-1.5238	0.291	1.16798	0.87530-1.55852	0.699	1.0484	0.82516-1.33203	0.893	1.04012	0.59069-1.83151	0.31	1.14877	0.88685-1.48805	-0.01103	0.81448	0.219	20.6168	15	0.14953	20.5329	14	0.11421	6.68574e-82	0.063488
ebi-a-GCST90002027	7	0.352	1.50707	0.68820-3.3003	0.951	0.98861	0.68753-1.42152	0.7	0.94422	0.70518-1.26431	0.607	1.14932	0.69560-1.89898	0.958	1.00988	0.71083-1.43473	-0.12338	0.26336	0.463	5.92608	6	0.43152	4.33909	5	0.5017	1.0326e-53	0.0644675
ebi-a-GCST90001518	15	0.94	1.00367	0.91453-1.1015	0.738	0.98078	0.87524-1.09904	0.704	0.98493	0.91079-1.06511	0.22	1.13618	0.93487-1.38084	0.214	0.93387	0.84243-1.03523	-0.02166	0.47542	0.682	10.313	14	0.73896	9.77289	13	0.71239	3.96201e-102	0.0528303
ebi-a-GCST90001514	10	0.758	0.96214	0.75885-1.2199	0.456	0.92142	0.74319-1.14239	0.706	1.03236	0.87507-1.21793	0.872	0.96655	0.64662-1.44477	0.433	0.91292	0.73431-1.13497	0.04556	0.43325	0.25	10.6221	9	0.3025	9.78916	8	0.28014	2.07704e-77	0.0602951
ebi-a-GCST90001621	23	0.364	1.14062	0.86387-1.5060	0.591	1.06809	0.84026-1.35769	0.712	0.96924	0.82112-1.14407	0.204	0.755	0.49575-1.14983	0.584	1.08627	0.81138-1.45428	-0.04905	0.16713	0.745	16.6872	22	0.78038	14.6393	21	0.84061	6.03943e-163	0.060089
ebi-a-GCST90001991	11	0.416	1.13604	0.84745-1.5229	0.439	1.071	0.90018-1.27424	0.713	1.02753	0.88912-1.18750	0.511	0.89931	0.66270-1.22040	0.434	1.0689	0.91060-1.25473	-0.04424	0.4599	0.933	3.66492	10	0.9612	3.06893	9	0.9615	1.96076e-260	0.0619124
ebi-a-GCST90001706	13	0.494	0.81874	0.47041-1.4250	0.623	1.07286	0.81075-1.41972	0.713	0.95389	0.74174-1.22672	0.681	1.089	0.73287-1.61819	0.317	1.19821	0.85358-1.68198	0.06961	0.55373	0.016	24.4992	12	0.01738	23.6954	11	0.01408	1.76099e-147	0.0871761
ebi-a-GCST90001825	16	0.554	0.93619	0.75663-1.1584	0.574	0.95158	0.80041-1.13129	0.713	0.97381	0.84522-1.12196	0.321	0.86069	0.64630-1.14619	0.634	0.96576	0.83921-1.11139	0.02037	0.6276	0.179	22.3075	15	0.09999	21.9223	14	0.08022	1.03498e-201	0.0587998
ebi-a-GCST90001631	16	0.751	1.06929	0.71286-1.6040	0.666	1.0843	0.75078-1.56599	0.717	1.04696	0.81689-1.34181	0.533	0.85381	0.52524-1.38792	0.783	1.05511	0.72471-1.53614	-0.0052	0.89917	0.983	6.43729	15	0.97143	6.42065	14	0.95475	2.96839e-101	0.0651318
ebi-a-GCST90002039	16	0.503	0.90641	0.68485-1.1997	0.168	1.18241	0.93188-1.50030	0.718	1.03545	0.85703-1.25101	0.268	1.25346	0.85290-1.84214	0.21	1.19777	0.91428-1.56916	0.06024	0.23434	0.216	19.9503	15	0.17385	17.9678	14	0.20825	7.52044e-247	0.073233
ebi-a-GCST90001403	10	0.527	0.29857	0.00827-10.7841	0.612	1.14684	0.67590-1.94594	0.72	0.92956	0.62368-1.38546	0.543	1.27865	0.59665-2.74022	0.501	1.27865	0.64282-2.54340	0.15244	0.54953	0.401	9.50356	9	0.39215	9.06144	8	0.33714	6.03038e-53	0.0686213
ebi-a-GCST90001980	15	0.863	0.9777	0.76008-1.2576	0.385	0.92189	0.76733-1.10757	0.721	0.97465	0.84658-1.12211	0.857	0.97021	0.70236-1.34021	0.374	0.92236	0.77621-1.09602	-0.00143	0.97702	0.885	7.73772	14	0.90254	7.73686	13	0.86031	1.18416e-249	0.0597872
ebi-a-GCST90001658	18	0.483	0.94721	0.81697-1.0982	0.646	0.97142	0.85835-1.09938	0.723	0.97899	0.87058-1.10091	0.76	0.97018	0.80115-1.17487	0.442	0.96143	0.87181-1.06027	0.02832	0.47236	0.051	30.0032	17	0.02632	29.0206	16	0.0238	8.15003e-238	0.0568236
ebi-a-GCST90001900	5	0.861	0.91576	0.36948-2.2698	0.49	0.88119	0.61556-1.26144	0.723	0.92648	0.60695-1.41424	0.725	1.14912	0.55911-2.36174	0.702	0.92335	0.63156-1.34994	0.0034	0.9781	0.254	8.037	4	0.09023	8.03462	3	0.0453	1.47338e-71	0.0834047
ebi-a-GCST90001946	12	0.722	1.02909	0.88246-1.2001	0.979	1.00147	0.90007-1.11428	0.725	0.98256	0.89092-1.08362	0.727	0.95081	0.72111-1.25369	0.959	0.99699	0.89079-1.11586	-0.03284	0.46175	0.693	9.05396	11	0.61691	8.46822	10	0.5832	0	0.0616759
ebi-a-GCST90001883	15	0.349	1.1868	0.83994-1.6769	0.557	1.07545	0.84387-1.37056	0.725	1.03631	0.84945-1.26426	0.545	1.12087	0.78179-1.60701	0.448	1.0932	0.87391-1.36753	-0.05924	0.36349	0.137	20.6792	14	0.11014	19.3585	13	0.1124	8.28432e-188	0.0682345
ebi-a-GCST90001605	11	0.907	1.01204	0.83211-1.2309	0.938	0.99303	0.83357-1.18298	0.726	0.97221	0.83034-1.13834	0.974	1.00806	0.63220-1.60739	0.966	0.99613	0.83580-1.18723	-0.03004	0.4935	0.477	10.9939	10	0.35799	10.405	9	0.3187	4.81723e-56	0.0530331
ebi-a-GCST90002067	10	0.888	1.04063	0.60914-1.7778	0.941	1.01244	0.73048-1.40322	0.728	1.04284	0.82305-1.32131	0.828	0.94405	0.56968-1.56446	0.881	0.96324	0.59863-1.54992	0.00058	0.99332	0.706	6.03599	9	0.73631	6.03592	8	0.64321	1.50983e-68	0.0607142
ebi-a-GCST90001528	10	0.887	1.0128	0.85436-1.2006	0.786	1.01563	0.90819-1.13579	0.73	1.01939	0.91412-1.13679	0.583	1.05439	0.87861-1.26533	0.767	1.01546	0.92010-1.12071	0.00535	0.9214	0.375	12.1529	9	0.20483	12.1371	8	0.14519	1.2849e-126	0.0556303
ebi-a-GCST90001821	16	0.307	1.1484	0.88926-1.4830	0.84	1.01872	0.85060-1.22007	0.731	0.97349	0.83543-1.13437	0.064	0.64411	0.41884-0.99055	0.505	1.07076	0.88012-1.30270	-0.05805	0.14483	0.307	17.8794	15	0.26906	15.2772	14	0.35947	1.43852e-220	0.0596863
ebi-a-GCST90002055	7	0.813	1.09487	0.53723-2.2313	0.788	0.9242	0.52047-1.64110	0.731	0.92572	0.59576-1.43842	0.704	0.85924	0.40755-1.81155	0.871	0.94678	0.50361-1.77992	-0.04496	0.58193	0.93	1.77498	6	0.93919	1.42893	5	0.92112	1.4706e-35	0.0668959
ebi-a-GCST90001822	14	0.532	0.91167	0.68803-1.2080	0.789	0.96886	0.76855-1.22138	0.735	0.96785	0.80083-1.16971	0.96	1.00891	0.71777-1.41815	0.81	0.9785	0.82271-1.16378	0.02724	0.57516	0.145	21.1025	13	0.07093	20.5344	12	0.05763	1.36553e-127	0.0589302
ebi-a-GCST90001625	9	0.668	1.29047	0.42197-3.9465	0.294	1.25629	0.82031-1.92400	0.735	1.07859	0.69545-1.67281	0.825	1.07629	0.57324-2.02079	0.375	1.23441	0.79523-1.91616	-0.02913	0.73962	0.171	13.3941	8	0.09899	13.1691	7	0.06809	5.75949e-72	0.0819911
ebi-a-GCST90001812	9	0.625	0.88233	0.54572-1.4266	0.413	0.89177	0.67776-1.17336	0.737	0.96379	0.77734-1.19495	0.61	0.88707	0.56979-1.38101	0.401	0.87749	0.65756-1.17099	0.05101	0.69757	0.524	7.47485	8	0.48637	7.30371	7	0.39796	4.79099e-63	0.0557627
ebi-a-GCST90001817	7	0.84	1.08943	0.49371-2.4039	0.395	1.21781	0.77329-1.91784	0.737	1.06256	0.74518-1.51511	0.5	1.2522	0.67747-2.31451	0.412	1.2522	0.75940-2.06482	-0.00476	0.94752	0.728	3.67585	6	0.72045	3.67106	5	0.59768	2.70301e-38	0.0604552
ebi-a-GCST90001953	10	0.846	1.01774	0.85671-1.2090	0.974	1.00183	0.89618-1.11994	0.74	1.01719	0.91965-1.12508	0.957	1.00679	0.79288-1.27840	0.962	1.0027	0.89923-1.11808	-0.0004	0.99418	0.78	6.08983	9	0.7309	6.08977	8	0.63718	0	0.0596254
ebi-a-GCST90001611	10	0.501	0.62391	0.16801-2.3169	0.434	0.82143	0.50191-1.34435	0.741	0.93153	0.61210-1.41767	0.578	0.80767	0.39133-1.66699	0.607	0.84066	0.44409-1.59136	0.06639	0.54338	0.22	12.2059	9	0.20195	11.6209	8	0.16894	2.56148e-63	0.0709652
ebi-a-GCST90001647	12	0.934	1.01032	0.79790-1.2793	0.786	1.0317	0.82362-1.29235	0.741	1.02873	0.86971-1.21682	0.535	0.90041	0.65296-1.24164	0.925	1.01056	0.81673-1.25040	0.00868	0.83534	0.672	9.09679	11	0.61296	9.05127	10	0.52724	4.36678e-92	0.0551799
ebi-a-GCST90001846	8	0.545	0.79865	0.40149-1.5887	0.246	0.83141	0.60849-1.13601	0.741	0.94893	0.69533-1.29502	0.844	0.92735	0.44871-1.91659	0.215	0.78931	0.56183-1.10891	0.04818	0.59653	0.214	10.6404	7	0.15509	10.1141	6	0.11993	1.60493e-102	0.0724655
ebi-a-GCST90001736	12	0.675	1.13056	0.64721-1.9749	0.785	1.04744	0.75128-1.46034	0.742	1.05121	0.78051-1.41579	0.766	1.07864	0.66259-1.75592	0.645	1.07864	0.78843-1.47567	-0.02145	0.76445	0.155	16.6095	11	0.11997	16.4535	10	0.08737	2.15117e-67	0.0625017
ebi-a-GCST90001761	17	0.231	0.67837	0.36868-1.2482	0.547	0.90504	0.65416-1.25213	0.743	0.95617	0.73116-1.25043	0.951	0.98109	0.54046-1.78097	0.517	0.88007	0.60330-1.28380	0.08743	0.23974	0.051	25.3216	16	0.06435	23.0213	15	0.08369	3.29468e-132	0.0672088
ebi-a-GCST90002011	5	0.938	1.11792	0.08332-14.9989	0.582	0.84997	0.47659-1.51587	0.744	0.92292	0.57074-1.49241	0.575	0.79399	0.37811-1.66730	0.49	0.78262	0.41573-1.47330	-0.02784	0.89228	0.651	2.94559	4	0.56697	2.92391	3	0.40351	5.22375e-30	0.062539
ebi-a-GCST90001881	7	0.275	1.52161	0.77794-2.9762	0.527	0.91088	0.68208-1.21643	0.747	0.96359	0.76907-1.20733	0.593	0.8912	0.59740-1.32949	0.607	0.90505	0.63096-1.29821	-0.13536	0.21583	0.432	6.0522	6	0.41737	4.04601	5	0.54281	5.35422e-46	0.0614604
ebi-a-GCST90002028	11	0.198	0.84929	0.67438-1.0696	0.481	0.9157	0.71683-1.16974	0.748	0.97065	0.80911-1.16443	0.434	1.28169	0.70575-2.32764	0.324	0.89558	0.72722-1.10293	0.06417	0.09755	0.484	7.96785	10	0.63198	4.55001	9	0.87164	2.76346e-56	0.0539345
ebi-a-GCST90001756	5	0.792	1.19076	0.36393-3.8961	0.677	0.8911	0.51809-1.53269	0.749	1.06911	0.71014-1.60954	0.811	0.90096	0.40460-2.00625	0.73	0.87216	0.42315-1.79762	-0.02778	0.86007	0.46	3.51399	4	0.47575	3.47137	3	0.32449	2.99291e-26	0.0586847
ebi-a-GCST90001665	17	0.772	1.02934	0.84957-1.2471	0.248	1.12854	0.91936-1.38531	0.75	0.97664	0.84464-1.12927	0.225	0.77902	0.52861-1.14803	0.248	1.12347	0.92890-1.35878	-0.02779	0.41866	0.243	18.5362	16	0.29344	17.7192	15	0.27771	1.26903e-124	0.0548305
ebi-a-GCST90001798	20	0.55	0.9142	0.68514-1.2198	0.633	0.94964	0.76817-1.17399	0.75	0.97624	0.84182-1.13212	0.532	0.91133	0.68450-1.21332	0.586	0.94747	0.78269-1.14695	0.02547	0.60936	0.8	14.6212	19	0.74635	14.3507	18	0.70596	0	0.0618766
ebi-a-GCST90002021	5	0.225	1.54508	0.88295-2.7038	0.666	1.06346	0.80450-1.40578	0.751	1.03829	0.82355-1.30902	0.712	1.07778	0.74388-1.56154	0.601	1.09834	0.79401-1.51932	-0.14278	0.22359	0.635	3.0776	4	0.54492	0.73777	3	0.86429	5.65625e-39	0.0584229
ebi-a-GCST90001524	11	0.204	1.30098	0.89311-1.8951	0.846	0.97224	0.73178-1.29172	0.751	0.96693	0.78539-1.19043	0.493	0.84689	0.53583-1.33851	0.749	0.94495	0.67403-1.32476	-0.10035	0.09846	0.406	10.3218	10	0.41273	6.92567	9	0.64486	4.08129e-69	0.0597117
ebi-a-GCST90002057	9	0.099	0.55461	0.30173-1.0194	0.662	0.93282	0.68288-1.27424	0.751	1.04342	0.80210-1.35733	0.876	1.04831	0.59123-1.85875	0.484	0.88131	0.62872-1.23536	0.16734	0.06182	0.302	9.31502	8	0.31642	4.38379	7	0.73466	1.55722e-66	0.0607958
ebi-a-GCST90001618	18	0.682	0.96523	0.81753-1.1396	0.544	0.95191	0.81166-1.11639	0.752	0.9812	0.87236-1.10362	0.709	0.94972	0.72744-1.23991	0.649	0.9686	0.84647-1.10836	0.009	0.78749	0.613	15.8151	17	0.53698	15.74	16	0.47125	1.37273e-157	0.0537063
ebi-a-GCST90002083	11	0.624	1.10908	0.74398-1.6533	0.96	1.00783	0.74284-1.36733	0.752	0.96426	0.76956-1.20823	0.752	0.92549	0.58022-1.47622	0.778	1.04633	0.76979-1.42222	-0.03905	0.4235	0.452	10.4766	10	0.39972	9.71759	9	0.37383	5.10718e-62	0.056538
ebi-a-GCST90001848	10	0.244	0.70175	0.40393-1.2191	0.228	0.77237	0.50751-1.17546	0.753	0.95142	0.69762-1.29756	0.843	1.07499	0.53578-2.15687	0.31	0.74058	0.42858-1.27969	0.07305	0.23196	0.398	9.38556	9	0.40247	7.71261	8	0.46204	3.71231e-58	0.0611934
ebi-a-GCST90001450	11	0.855	0.97835	0.77894-1.2288	0.679	0.95969	0.78996-1.16588	0.76	0.97321	0.81761-1.15843	0.286	0.84052	0.62136-1.13696	0.624	0.96123	0.82464-1.12043	-0.00402	0.9408	0.137	18.1477	10	0.05252	18.136	9	0.03363	2.42678e-70	0.0542258
ebi-a-GCST90001793	11	0.885	0.95134	0.49239-1.8381	0.741	0.93924	0.64793-1.36153	0.761	0.9574	0.72325-1.26736	0.681	0.88395	0.49954-1.56417	0.577	0.87244	0.54849-1.38771	0.00145	0.98379	0.869	5.03565	10	0.88878	5.03521	9	0.83123	8.76739e-114	0.0638595
ebi-a-GCST90001799	11	0.179	1.47029	0.87515-2.4701	0.56	1.09195	0.81233-1.46782	0.769	1.03268	0.83312-1.28003	0.707	1.08439	0.71907-1.63532	0.625	1.08439	0.79114-1.48634	-0.0976	0.17665	0.562	9.01259	10	0.53091	6.8629	9	0.65139	2.73091e-77	0.0605603
ebi-a-GCST90001887	10	0.121	1.18435	0.97810-1.4341	0.56	1.05517	0.88066-1.26425	0.769	1.02299	0.87881-1.19083	0.204	0.7216	0.45240-1.15097	0.317	1.1031	0.91994-1.32272	-0.11414	0.05813	0.336	10.5282	9	0.30944	5.64658	8	0.68675	2.50975e-85	0.053799
ebi-a-GCST90001610	8	0.273	0.49174	0.15541-1.5560	0.646	0.88879	0.53766-1.46923	0.771	1.06635	0.69245-1.64213	0.543	0.79735	0.39813-1.59686	0.734	0.89443	0.48234-1.65858	0.13601	0.20918	0.283	8.91335	7	0.25894	6.70309	6	0.34918	2.56452e-55	0.0671409
ebi-a-GCST90001731	10	0.495	0.8479	0.53947-1.3327	0.811	0.9584	0.67627-1.35824	0.773	0.96246	0.74202-1.24839	0.734	0.90899	0.53363-1.54837	0.732	0.92428	0.59755-1.42967	0.03884	0.52078	0.735	5.75273	9	0.76439	5.30173	8	0.72489	5.97403e-50	0.0549148
ebi-a-GCST90001500	17	0.669	1.05049	0.84209-1.3105	0.971	0.99598	0.80441-1.23319	0.774	1.02356	0.87346-1.19945	0.81	0.9608	0.69687-1.32468	0.99	0.99857	0.80844-1.23340	-0.01203	0.74575	0.913	9.95257	16	0.86909	9.84348	15	0.82947	4.58154e-116	0.0545685
ebi-a-GCST90001439	6	0.897	0.90778	0.23095-3.5681	0.192	0.6904	0.39564-1.20477	0.774	0.92463	0.54146-1.57896	0.479	0.73325	0.33106-1.62408	0.297	0.71105	0.40017-1.26347	0.00467	0.97804	0.149	9.82252	5	0.08042	9.82041	4	0.04356	8.58079e-47	0.0689232
ebi-a-GCST90001652	10	0.078	0.25311	0.06683-0.9586	0.604	1.1572	0.66632-2.00970	0.775	1.06832	0.67932-1.68008	0.234	1.89055	0.71023-5.03247	0.269	1.68251	0.70820-3.99723	0.21711	0.05769	0.223	12.4049	9	0.19143	7.50157	8	0.4836	5.42967e-52	0.0672341
ebi-a-GCST90001613	11	0.223	1.11949	0.94525-1.3259	0.096	1.13966	0.97706-1.32932	0.776	1.02404	0.86962-1.20588	0.475	0.76314	0.37393-1.55749	0.137	1.13934	0.97266-1.33459	-0.07051	0.08051	0.293	17.5296	10	0.06344	12.2531	9	0.19941	1.56159e-69	0.0528186
ebi-a-GCST90002084	12	0.82	0.98516	0.86908-1.1167	0.984	1.00133	0.87758-1.14252	0.776	1.01576	0.91188-1.13148	0.892	1.02281	0.74483-1.40453	0.965	1.0026	0.89548-1.12253	0.02871	0.36975	0.733	9.61635	11	0.56519	8.7342	10	0.5575	7.47816e-68	0.0513574
ebi-a-GCST90001908	12	0.699	1.10205	0.68308-1.7780	0.825	0.96769	0.72292-1.29533	0.778	1.0366	0.80769-1.33038	0.831	1.05984	0.62964-1.78398	0.932	0.98257	0.66169-1.45905	-0.01942	0.77094	0.098	17.1696	11	0.10296	17.0173	10	0.07398	3.39751e-70	0.0581457
ebi-a-GCST90002075	7	0.972	1.01479	0.46908-2.1954	0.757	1.06601	0.71079-1.59877	0.782	1.04571	0.76239-1.43430	0.462	1.25901	0.70858-2.23701	0.408	0.80754	0.50398-1.29394	0.00694	0.93667	0.56	4.67792	6	0.58573	4.67094	5	0.45734	8.7055e-36	0.0560762
ebi-a-GCST90001445	7	0.316	0.33499	0.04887-2.2963	0.579	0.84695	0.47106-1.52277	0.782	0.91195	0.47446-1.75284	0.726	0.8635	0.39447-1.89022	0.732	0.88107	0.44090-1.76066	0.21395	0.32859	0.056	13.5277	6	0.03538	10.9606	5	0.05217	7.46845e-35	0.0694966
ebi-a-GCST90001427	10	0.664	0.90004	0.56978-1.4217	0.618	0.9106	0.63023-1.31569	0.782	1.04215	0.77738-1.39711	0.22	1.65363	0.78247-3.49471	0.654	0.91655	0.63437-1.32427	0.03793	0.43092	0.394	10.009	9	0.34976	9.21644	8	0.32437	3.31163e-53	0.0566606
ebi-a-GCST90001420	9	0.727	1.12421	0.59719-2.1163	0.7	1.06964	0.75936-1.50670	0.785	0.95227	0.67047-1.35252	0.981	1.00661	0.58874-1.72106	0.804	1.0589	0.68368-1.64004	-0.05319	0.54897	0.111	15.0731	8	0.05774	14.2654	7	0.04666	1.6862e-44	0.0572539
ebi-a-GCST90001637	17	0.551	0.88573	0.59952-1.3086	0.486	0.8976	0.66255-1.21603	0.785	1.03008	0.83233-1.27481	0.232	0.74733	0.47205-1.18316	0.652	0.92067	0.64690-1.31031	0.04152	0.3797	0.643	13.7473	16	0.61754	12.928	15	0.60786	2.2599e-147	0.0587724
ebi-a-GCST90001496	18	0.849	1.01551	0.86930-1.1863	0.773	0.9763	0.82948-1.14912	0.786	1.01561	0.90811-1.13583	0.577	1.07118	0.84537-1.35732	0.87	1.01167	0.88215-1.16021	6e-05	0.99868	0.85	11.2318	17	0.84426	11.2318	16	0.79495	4.80537e-227	0.053583
ebi-a-GCST90001851	20	0.88	0.98462	0.80744-1.2007	0.967	1.0039	0.83262-1.21041	0.788	0.98181	0.85869-1.12258	0.629	0.92723	0.68578-1.25371	0.656	0.96138	0.81077-1.13997	-0.00137	0.96915	0.246	23.6281	19	0.21081	23.6261	18	0.16766	1.30664e-175	0.0545347
ebi-a-GCST90001482	22	0.682	0.97957	0.88887-1.0795	0.89	0.99275	0.89505-1.10111	0.792	0.98961	0.91578-1.06940	0.865	1.01708	0.83883-1.23322	0.908	0.99481	0.91152-1.08571	0.01264	0.73633	0.833	15.7296	21	0.78465	15.613	20	0.74033	3.99083e-202	0.0514453
ebi-a-GCST90001977	10	0.785	1.10693	0.54670-2.2413	0.658	0.90747	0.59075-1.39398	0.794	0.95354	0.66746-1.36222	0.218	1.62442	0.79251-3.32961	0.759	0.91449	0.52608-1.58966	-0.0416	0.63851	0.185	13.4482	9	0.14335	13.0591	8	0.10983	4.59108e-52	0.0594133
ebi-a-GCST90001959	8	0.705	0.87373	0.44928-1.6992	0.467	0.85393	0.55782-1.30722	0.798	0.96082	0.70797-1.30396	0.357	0.73412	0.39713-1.35705	0.454	0.79401	0.44881-1.40472	0.02565	0.76114	0.465	6.52898	7	0.47951	6.42065	6	0.37775	4.17781e-48	0.0561055
ebi-a-GCST90001547	9	0.717	0.92118	0.60160-1.4105	0.968	1.00684	0.71886-1.41021	0.799	1.03993	0.76913-1.40608	0.879	1.04998	0.57112-1.93034	0.916	1.01708	0.75076-1.37788	0.05483	0.44543	0.469	9.69274	8	0.28726	8.865	7	0.26249	2.38596e-55	0.0565872
ebi-a-GCST90001603	9	0.217	1.5702	0.81800-3.0141	0.998	0.99957	0.66173-1.50987	0.799	0.95802	0.68827-1.33349	0.859	1.05468	0.59661-1.86445	0.969	0.98927	0.58857-1.66277	-0.11304	0.13656	0.387	9.3556	8	0.31319	6.52838	7	0.47958	1.20736e-52	0.056536
ebi-a-GCST90001438	9	0.816	0.88544	0.32940-2.3801	0.705	1.10839	0.65087-1.88753	0.8	0.94895	0.63239-1.42398	0.51	1.31485	0.60424-2.86116	0.581	1.26021	0.57252-2.77394	0.01176	0.8829	0.42	8.83017	8	0.35682	8.80084	7	0.26727	6.18979e-46	0.0584544
ebi-a-GCST90001819	13	0.802	0.96004	0.70377-1.3096	0.679	0.95143	0.75151-1.20454	0.801	0.97345	0.78947-1.20030	0.553	0.89663	0.63177-1.27253	0.729	0.96343	0.78444-1.18328	0.00684	0.90413	0.085	22.0411	12	0.03706	22.0107	11	0.02429	3.62087e-117	0.0556169
ebi-a-GCST90001878	11	0.771	0.96716	0.77791-1.2024	0.462	0.96182	0.86703-1.06698	0.801	0.98338	0.86291-1.12066	0.785	0.96115	0.72816-1.26870	0.477	0.96115	0.86534-1.06757	0.01318	0.85126	0.192	20.5852	10	0.02418	20.5004	9	0.01506	1.10276e-72	0.0536182
ebi-a-GCST90002049	6	0.491	0.75452	0.36427-1.5628	0.941	1.01209	0.73779-1.38837	0.802	0.96674	0.74246-1.25878	0.899	1.02963	0.67051-1.58109	0.807	1.05019	0.72393-1.52348	0.10998	0.51046	0.444	5.59188	5	0.34798	4.94776	4	0.2927	2.48181e-31	0.0553578
ebi-a-GCST90001667	15	0.092	1.08628	0.99358-1.1876	0.184	1.07459	0.96634-1.19496	0.804	1.01241	0.91842-1.11601	0.238	0.86122	0.67920-1.09203	0.389	1.03978	0.95409-1.13317	-0.10126	0.009	0.068	24.6742	14	0.03792	14.3149	13	0.35204	4.10053e-102	0.0511424
ebi-a-GCST90002068	16	0.74	0.95632	0.73835-1.2386	0.991	0.99876	0.79776-1.25040	0.806	1.02039	0.86884-1.19837	0.795	0.95056	0.65238-1.38502	0.427	0.88452	0.65901-1.18719	0.02661	0.54064	0.899	7.86253	15	0.92918	7.46918	14	0.91511	3.52805e-90	0.0531295
ebi-a-GCST90001396	6	0.917	1.04546	0.47849-2.2843	0.996	0.99871	0.62401-1.59840	0.807	0.95371	0.65259-1.39375	0.864	1.05481	0.59147-1.88111	0.968	1.01058	0.61729-1.65445	-0.0224	0.80519	0.795	2.72936	5	0.74162	2.65993	4	0.61624	5.70493e-31	0.0545875
ebi-a-GCST90001678	12	0.147	1.22724	0.95074-1.5842	0.474	0.90416	0.68600-1.19168	0.807	1.02506	0.84070-1.24983	0.349	0.77533	0.46541-1.29164	0.381	0.84663	0.59226-1.21023	-0.0746	0.08018	0.224	13.378	11	0.26934	9.58805	10	0.47735	9.09458e-64	0.0532397
ebi-a-GCST90001488	9	0.77	0.94621	0.66246-1.3515	0.57	1.09945	0.79284-1.52462	0.807	1.02952	0.81473-1.30093	0.357	1.3101	0.76231-2.25154	0.578	1.13123	0.74542-1.71673	0.03463	0.54584	0.406	8.26356	8	0.40816	7.81397	7	0.34928	9.83849e-49	0.0531572
ebi-a-GCST90002006	20	0.184	1.14409	0.94535-1.3846	0.85	1.01595	0.86233-1.19694	0.808	1.01498	0.90031-1.14425	0.711	1.04587	0.82778-1.32142	0.623	1.03863	0.89510-1.20518	-0.06495	0.13128	0.718	15.3594	19	0.6995	12.8597	18	0.79984	0	0.0541044
ebi-a-GCST90001612	10	0.342	1.3743	0.74206-2.5452	0.7	0.9239	0.61764-1.38202	0.809	0.96346	0.71242-1.30295	0.502	0.79282	0.41356-1.51988	0.567	0.85463	0.50936-1.43395	-0.10152	0.23122	0.552	8.01806	9	0.53233	6.33931	8	0.60928	9.46956e-67	0.0561802
ebi-a-GCST90001958	11	0.957	0.98589	0.59483-1.6340	0.694	1.07155	0.75980-1.51121	0.809	0.96773	0.74163-1.26275	0.688	1.11631	0.66216-1.88194	0.753	1.0661	0.72314-1.57171	-0.00463	0.93281	0.442	10.3743	10	0.40829	10.3657	9	0.3217	1.19938e-69	0.055856
ebi-a-GCST90001820	11	0.195	1.38139	0.87873-2.1716	0.455	1.08083	0.88126-1.32559	0.81	1.02468	0.84004-1.24991	0.702	0.92407	0.62377-1.36894	0.391	1.09254	0.90017-1.32603	-0.14325	0.18796	0.332	12.4151	10	0.25823	10.1302	9	0.34005	2.10104e-165	0.056535
ebi-a-GCST90002074	15	0.613	0.92358	0.68361-1.2478	0.737	1.04137	0.82221-1.31893	0.814	0.97812	0.81372-1.17572	0.731	1.06651	0.74443-1.52793	0.763	1.03736	0.82153-1.30989	0.02224	0.63864	0.376	15.7753	14	0.32729	15.4996	13	0.27721	9.42034e-259	0.0585045
ebi-a-GCST90002040	23	0.452	0.90851	0.71070-1.1614	0.468	0.92018	0.73510-1.15185	0.815	0.98198	0.84344-1.14327	0.557	0.88186	0.58364-1.33246	0.377	0.90804	0.73612-1.12012	0.02533	0.43804	0.611	19.822	22	0.59417	19.1971	21	0.5725	6.81421e-149	0.0539422
ebi-a-GCST90001776	10	0.269	1.22244	0.87780-1.7024	0.619	1.07505	0.80845-1.42956	0.815	1.03075	0.79939-1.32907	0.629	0.87901	0.53030-1.45704	0.549	1.08942	0.83177-1.42687	-0.0743	0.18198	0.177	14.4563	9	0.107	11.4094	8	0.17956	1.05757e-50	0.05354
ebi-a-GCST90001729	12	0.296	0.81529	0.56724-1.1718	0.366	0.85638	0.61174-1.19885	0.816	0.97104	0.75805-1.24388	0.747	0.90634	0.50652-1.62174	0.427	0.88197	0.65452-1.18846	0.07027	0.23475	0.332	13.0377	11	0.29087	11.2406	10	0.33908	2.13146e-82	0.0547862
ebi-a-GCST90001683	6	0.274	0.63505	0.31446-1.2825	0.637	0.87272	0.49613-1.53516	0.816	0.95078	0.62088-1.45597	0.677	0.85041	0.41461-1.74429	0.375	0.76134	0.43987-1.31775	0.0918	0.24567	0.386	5.88235	5	0.31784	4.02392	4	0.40278	4.96684e-33	0.0560062
ebi-a-GCST90001750	14	0.796	1.09134	0.57026-2.0886	0.783	1.04553	0.76155-1.43540	0.818	1.02693	0.81859-1.28830	0.901	0.96441	0.55103-1.68790	0.511	1.18447	0.72503-1.93507	-0.01413	0.84786	0.681	10.2288	13	0.67512	10.1904	12	0.59926	1.92526e-79	0.0573549
ebi-a-GCST90002099	10	0.735	1.05152	0.79432-1.3920	0.391	1.09257	0.89257-1.33739	0.819	0.97822	0.81041-1.18078	0.647	0.91352	0.62852-1.32773	0.463	1.08151	0.88514-1.32143	-0.04716	0.50476	0.167	14.5239	9	0.10487	13.6894	8	0.09023	1.37879e-68	0.0528116
ebi-a-GCST90002098	17	0.987	0.99861	0.84967-1.1736	0.858	0.98463	0.83063-1.16718	0.819	0.98616	0.87528-1.11109	0.813	0.96383	0.71412-1.30086	0.743	0.96995	0.81062-1.16059	-0.01033	0.82447	0.891	9.3724	16	0.89729	9.32145	15	0.86012	1.42309e-224	0.0531808
ebi-a-GCST90001952	10	0.401	1.07532	0.91579-1.2626	0.948	1.00349	0.90346-1.11461	0.821	0.98703	0.88152-1.10516	0.927	1.01593	0.73232-1.40937	0.905	1.00695	0.90106-1.12529	-0.05582	0.19728	0.427	11.4423	9	0.24661	9.17443	8	0.3278	1.19083e-295	0.055202
ebi-a-GCST90001664	27	0.52	0.97702	0.91104-1.0478	0.753	0.98587	0.90238-1.07708	0.822	0.99297	0.93367-1.05604	0.874	1.01351	0.85989-1.19458	0.821	0.99154	0.92190-1.06643	0.02209	0.34686	0.72	21.8083	26	0.69914	20.8891	25	0.69878	3.80918e-207	0.0506771
ebi-a-GCST90002012	10	0.851	0.97206	0.72942-1.2954	0.767	0.96484	0.76143-1.22260	0.824	0.97753	0.79992-1.19458	0.998	1.00065	0.64995-1.54058	0.819	0.97198	0.76756-1.23083	0.00218	0.95866	0.949	3.70536	9	0.92971	3.7025	8	0.88292	2.34919e-67	0.0523789
ebi-a-GCST90001758	22	0.725	1.03545	0.85489-1.2542	0.966	1.00428	0.82705-1.21949	0.826	0.98396	0.85147-1.13705	0.699	0.9274	0.63625-1.35179	0.898	0.98772	0.81948-1.19051	-0.02049	0.43577	0.767	17.0089	21	0.71057	16.3763	20	0.69302	3.14187e-140	0.0523927
ebi-a-GCST90001550	8	0.083	1.73558	1.03087-2.9220	0.683	1.09892	0.69892-1.72787	0.828	1.04496	0.70354-1.55209	0.13	0.49154	0.21832-1.10670	0.442	1.24485	0.73521-2.10778	-0.13052	0.05254	0.177	10.8285	7	0.14628	5.01837	6	0.54146	8.76059e-41	0.0562184
ebi-a-GCST90001591	10	0.375	1.28968	0.75854-2.1927	0.509	1.15945	0.74705-1.79952	0.83	0.9638	0.68767-1.35081	0.367	1.51739	0.64189-3.58700	0.316	1.32048	0.79055-2.20565	-0.07395	0.21234	0.296	10.0394	9	0.3473	8.16474	8	0.41755	2.1618e-49	0.0545525
ebi-a-GCST90001601	8	0.64	1.09512	0.76301-1.5718	0.857	0.97045	0.70019-1.34503	0.831	1.02686	0.80505-1.30978	0.3	1.33986	0.80277-2.23630	0.516	0.8707	0.58547-1.29488	-0.02839	0.65343	0.686	4.3574	7	0.73781	4.13438	6	0.6585	1.13366e-44	0.0522411
ebi-a-GCST90001967	5	0.185	16.1432	0.67376-386.7901	0.867	1.06091	0.53241-2.11404	0.832	1.05766	0.62974-1.77637	0.32	1.80721	0.64962-5.02757	0.537	1.30544	0.60128-2.83424	-0.60233	0.18681	0.497	3.81405	4	0.43176	0.90837	3	0.82341	8.79819e-27	0.0571998
ebi-a-GCST90001949	14	0.852	1.01584	0.86456-1.1936	0.946	1.00383	0.89802-1.12209	0.834	1.01068	0.91512-1.11622	0.764	1.03979	0.80993-1.33488	0.908	1.00692	0.89812-1.12889	-0.00324	0.93861	0.956	6.44759	13	0.92834	6.4414	12	0.89222	0	0.0545653
ebi-a-GCST90001573	18	0.839	0.96793	0.71015-1.3193	0.78	0.96009	0.72162-1.27735	0.834	1.02086	0.84130-1.23875	0.935	1.02215	0.60702-1.72119	0.629	0.89286	0.56849-1.40233	0.01698	0.66684	0.181	20.5794	17	0.24567	20.3349	16	0.20551	1.60943e-112	0.0535303
ebi-a-GCST90001834	10	0.505	1.2217	0.69587-2.1449	0.541	1.09377	0.82076-1.45760	0.837	1.03027	0.77611-1.36764	0.473	0.81568	0.47862-1.39014	0.716	1.05701	0.79155-1.41150	-0.0516	0.5073	0.223	13.6968	9	0.13353	12.9189	8	0.11467	1.54859e-96	0.0575768
ebi-a-GCST90001986	11	0.621	0.89828	0.59558-1.3548	0.746	1.05503	0.76267-1.45947	0.84	1.02563	0.80243-1.31093	0.612	1.12627	0.72150-1.75811	0.716	1.07357	0.74040-1.55666	0.04225	0.45073	0.879	5.24198	10	0.87444	4.6204	9	0.86606	1.414e-63	0.052906
ebi-a-GCST90001639	11	0.2	1.4509	0.85641-2.4581	0.413	1.17308	0.80046-1.71916	0.842	0.96939	0.71456-1.31510	0.99	1.00402	0.55377-1.82036	0.526	1.1625	0.74213-1.82099	-0.09393	0.10564	0.384	10.9723	10	0.35968	7.73763	9	0.56079	7.57852e-58	0.0538119
ebi-a-GCST90001733	10	0.73	1.12363	0.59315-2.1285	0.685	1.08507	0.73129-1.60999	0.842	1.03171	0.75866-1.40303	0.661	1.14754	0.63247-2.08207	0.626	1.12281	0.71577-1.76134	-0.01946	0.76899	0.354	10.3682	9	0.32151	10.2499	8	0.24792	2.69801e-51	0.0536334
ebi-a-GCST90001456	9	0.732	0.83351	0.30585-2.2715	0.723	0.91793	0.57162-1.47404	0.842	1.04147	0.69806-1.55380	0.812	0.91461	0.44942-1.86129	0.733	0.89455	0.48230-1.65920	0.04837	0.64602	0.268	11.0384	8	0.19953	10.687	7	0.15287	1.315e-45	0.0566385
ebi-a-GCST90002094	8	0.492	0.9176	0.72860-1.1556	0.642	0.96128	0.81368-1.13566	0.842	1.01306	0.89147-1.15124	0.484	1.10388	0.84958-1.43430	0.504	0.94353	0.80271-1.10904	0.05766	0.35124	0.793	3.23057	7	0.86288	2.2094	6	0.89947	2.09241e-74	0.0518443
ebi-a-GCST90002096	11	0.525	1.20454	0.69350-2.0922	0.498	0.91684	0.71340-1.17829	0.842	0.98096	0.81167-1.18556	0.624	0.91046	0.63303-1.30948	0.606	0.9253	0.69542-1.23116	-0.07762	0.45646	0.445	10.2428	10	0.41946	9.59712	9	0.38407	1.15529e-79	0.0542366
ebi-a-GCST90002076	13	0.899	1.02021	0.75435-1.3798	0.991	0.99848	0.76710-1.29967	0.844	0.9819	0.81843-1.17803	0.614	0.91276	0.64619-1.28930	0.997	1.00043	0.78292-1.27835	-0.01268	0.76125	0.986	4.64371	12	0.96883	4.54669	11	0.95112	2.0165e-89	0.0522966
ebi-a-GCST90001578	12	0.628	1.24736	0.52384-2.9702	0.402	1.2072	0.77715-1.87522	0.847	1.03282	0.74394-1.43387	0.436	1.32023	0.67318-2.58920	0.354	1.35331	0.73312-2.49816	-0.03327	0.65496	0.737	7.82113	11	0.72923	7.60901	10	0.66697	2.29114e-62	0.0546785
ebi-a-GCST90001519	10	0.975	0.99391	0.68582-1.4404	0.997	0.99958	0.78979-1.26509	0.848	0.98222	0.81763-1.17994	0.952	0.99005	0.71929-1.36274	0.881	0.97635	0.72027-1.32348	-0.00421	0.94444	0.944	3.13319	9	0.95878	3.12802	8	0.92607	2.79541e-65	0.0526217
ebi-a-GCST90001687	12	0.135	0.44208	0.16521-1.1829	0.363	1.23475	0.78380-1.94516	0.85	1.03713	0.71166-1.51147	0.478	1.34361	0.61136-2.95291	0.384	1.31815	0.72571-2.39421	0.16102	0.10016	0.112	16.8788	11	0.11151	12.7086	10	0.24043	1.4546e-70	0.0572998
ebi-a-GCST90002048	7	0.529	0.88822	0.62995-1.2524	0.993	1.0012	0.76749-1.30607	0.852	0.9795	0.78837-1.21697	0.844	1.04757	0.67217-1.63261	0.967	1.00532	0.78712-1.28400	0.05056	0.50382	0.714	4.64083	6	0.59063	4.12256	5	0.53191	4.02182e-37	0.0525484
ebi-a-GCST90001468	8	0.267	1.25912	0.87022-1.8218	0.59	1.0688	0.83897-1.36158	0.853	1.0251	0.78844-1.33280	0.779	1.08007	0.64319-1.81369	0.587	1.07245	0.84271-1.36483	-0.10189	0.19662	0.372	10.2912	7	0.17266	7.61441	6	0.26774	1.38665e-231	0.0595613
ebi-a-GCST90001739	11	0.553	0.85203	0.51180-1.4184	0.84	1.04459	0.68410-1.59505	0.854	1.02897	0.75864-1.39562	0.753	1.08958	0.64809-1.83182	0.797	1.05983	0.68887-1.63055	0.05229	0.3889	0.945	4.15665	10	0.94	3.33708	9	0.94942	2.4312e-57	0.0533261
ebi-a-GCST90001501	14	0.428	1.06269	0.91889-1.2290	0.328	1.07111	0.93324-1.22935	0.855	0.99048	0.89367-1.09778	0.889	0.98468	0.79639-1.21750	0.84	1.01468	0.88307-1.16592	-0.07225	0.2152	0.27	15.5886	13	0.27206	13.6421	12	0.32414	3.81918e-95	0.05063
ebi-a-GCST90001607	8	0.956	1.04758	0.21194-5.1780	0.521	0.86525	0.55620-1.34602	0.856	0.9694	0.69303-1.35598	0.674	0.85587	0.42712-1.71504	0.589	0.79757	0.36456-1.74493	-0.01285	0.92566	0.695	4.10072	7	0.76811	4.09126	6	0.66433	3.72539e-45	0.0529281
ebi-a-GCST90001393	7	0.651	0.59108	0.06917-5.0512	0.916	0.9679	0.52716-1.77712	0.858	1.04253	0.65967-1.64761	0.685	0.83944	0.37539-1.87714	0.742	0.87419	0.40676-1.87877	0.07985	0.61839	0.744	3.57033	6	0.73459	3.28876	5	0.65556	5.45202e-39	0.054899
ebi-a-GCST90001590	12	0.522	1.09016	0.84460-1.4071	0.817	0.976	0.79478-1.19854	0.859	0.98178	0.80180-1.20218	0.896	1.03364	0.63793-1.67482	0.789	0.97036	0.78226-1.20369	-0.05217	0.23402	0.23	16.3964	11	0.12704	14.1297	10	0.16716	7.77323e-67	0.051561
ebi-a-GCST90001866	10	0.461	0.8267	0.51051-1.3387	0.789	1.04168	0.77207-1.40543	0.862	1.01984	0.81678-1.27337	0.894	1.03783	0.61123-1.76217	0.703	0.92848	0.64153-1.34379	0.05632	0.36431	0.445	8.27729	9	0.50646	7.3522	8	0.49915	7.19721e-91	0.0529905
ebi-a-GCST90001537	15	0.949	1.00726	0.80878-1.2545	0.699	0.95686	0.76526-1.19644	0.862	0.98569	0.83738-1.16026	0.643	0.90854	0.61079-1.35142	0.544	0.93722	0.76401-1.14971	-0.01206	0.76736	0.417	14.7889	14	0.39274	14.6858	13	0.32738	1.23795e-83	0.0512674
ebi-a-GCST90001752	18	0.456	1.11841	0.83942-1.4901	0.7	1.04415	0.83837-1.30045	0.863	1.01725	0.83799-1.23487	0.447	1.2048	0.75380-1.92561	0.664	1.05137	0.84210-1.31266	-0.03275	0.39022	0.109	26.962	17	0.05863	25.7087	16	0.05827	6.31404e-140	0.0527841
ebi-a-GCST90001686	14	0.774	0.91696	0.51367-1.6369	0.687	1.08441	0.73094-1.60880	0.868	0.9774	0.74628-1.28010	0.932	1.02555	0.58269-1.80498	0.655	1.11023	0.70951-1.73725	0.01213	0.81137	0.76	9.37154	13	0.74434	9.31202	12	0.67607	2.66394e-81	0.0530215
ebi-a-GCST90001905	6	0.493	0.89976	0.68350-1.1844	0.734	0.95826	0.74924-1.22558	0.87	0.98346	0.80555-1.20066	0.234	1.28072	0.89465-1.83338	0.688	0.94829	0.74275-1.21071	0.0554	0.40871	0.953	1.2779	5	0.93719	0.42784	4	0.98013	8.13362e-32	0.0507543
ebi-a-GCST90001526	10	0.747	0.93531	0.63187-1.3845	0.803	0.97708	0.81398-1.17285	0.871	0.98492	0.81995-1.18307	0.804	0.96691	0.74699-1.25157	0.775	0.97289	0.81058-1.16769	0.02233	0.77416	0.205	14.3545	9	0.11026	14.1982	8	0.07674	3.93868e-129	0.0534627
ebi-a-GCST90001765	13	0.873	1.01076	0.88874-1.1495	0.846	0.98705	0.86497-1.12635	0.873	0.99153	0.89291-1.10103	0.952	0.99466	0.83745-1.18137	0.852	0.98941	0.88652-1.10423	-0.01689	0.60085	0.517	12.8703	12	0.37854	12.5395	11	0.32448	1.45743e-119	0.050576
ebi-a-GCST90001728	14	0.888	0.98984	0.86160-1.1372	0.577	0.966	0.85537-1.09094	0.876	0.99282	0.90678-1.08701	0.688	1.03946	0.86434-1.25006	0.673	0.97659	0.87700-1.08748	0.00298	0.95519	0.546	12.74	13	0.46809	12.7365	12	0.38848	4.96874e-88	0.0505727
ebi-a-GCST90001989	14	0.655	0.94729	0.75162-1.1939	0.56	0.95283	0.81007-1.12074	0.878	1.00966	0.89319-1.14132	0.714	1.05605	0.79385-1.40485	0.57	0.96211	0.84495-1.09550	0.03539	0.53612	0.645	10.2621	13	0.67237	9.85641	12	0.62856	0	0.0518495
ebi-a-GCST90001995	15	0.675	1.11353	0.68068-1.8216	0.796	1.03438	0.80071-1.33625	0.879	1.01572	0.83025-1.24263	0.902	0.97436	0.65013-1.46030	0.851	1.02644	0.78510-1.34197	-0.02755	0.69282	0.452	15.3168	14	0.35685	15.1269	13	0.2995	3.62711e-141	0.0523445
ebi-a-GCST90001858	19	0.575	1.0658	0.85664-1.3260	0.712	0.96633	0.80581-1.15884	0.88	0.98941	0.86131-1.13655	0.787	1.04453	0.76530-1.42564	0.58	0.94969	0.79356-1.13654	-0.03304	0.39771	0.282	20.9615	18	0.28136	20.0728	17	0.27052	2.63921e-306	0.0523705
ebi-a-GCST90001778	11	0.938	1.01439	0.71554-1.4380	0.635	0.93394	0.70459-1.23795	0.882	0.98444	0.80085-1.21012	0.959	1.01135	0.66762-1.53205	0.902	1.01861	0.76435-1.35745	-0.00974	0.83931	0.557	8.89677	10	0.54193	8.85321	9	0.45093	1.04313e-102	0.0516821
ebi-a-GCST90002105	11	0.344	1.09572	0.91583-1.3109	0.387	1.06122	0.92766-1.21402	0.883	0.99059	0.87372-1.12310	0.545	0.89125	0.62178-1.27750	0.429	1.06131	0.92139-1.22248	-0.06816	0.17468	0.343	11.1284	10	0.3476	8.95692	9	0.44126	2.39056e-299	0.0518496
ebi-a-GCST90001781	13	0.98	1.00252	0.82353-1.2204	0.969	0.99635	0.82685-1.20060	0.883	0.98978	0.86316-1.13498	0.155	0.76785	0.54591-1.08002	0.984	0.9983	0.84691-1.17674	-0.00667	0.86228	0.923	6.73004	12	0.87493	6.69851	11	0.82295	5.37675e-92	0.0511969
ebi-a-GCST90002058	9	0.949	1.01829	0.59562-1.7409	0.968	0.99341	0.71554-1.37918	0.885	1.0203	0.77667-1.34035	0.889	0.96566	0.59964-1.55508	0.93	0.98335	0.68411-1.41349	0.00049	0.99357	0.895	3.92089	8	0.86419	3.92082	7	0.78885	2.1108e-85	0.0527641
ebi-a-GCST90001870	7	0.788	0.9298	0.56275-1.5362	0.561	0.92536	0.71259-1.20166	0.885	0.98453	0.79636-1.21716	0.731	0.94132	0.67768-1.30752	0.59	0.92401	0.70384-1.21307	0.0195	0.81524	0.817	3.29759	6	0.77067	3.23693	5	0.66351	1.51531e-66	0.0522631
ebi-a-GCST90001757	21	0.824	1.00695	0.94811-1.0694	0.946	0.99771	0.93318-1.06671	0.889	1.00397	0.94973-1.06131	0.865	1.02542	0.77013-1.36533	0.994	1.00024	0.94398-1.05986	-0.00552	0.80543	0.651	18.6713	20	0.54327	18.6089	19	0.48217	1.03395e-157	0.0501627
ebi-a-GCST90001535	13	0.576	0.93119	0.73075-1.1866	0.278	0.87794	0.69383-1.11090	0.891	1.01271	0.84542-1.21311	0.47	1.224	0.71948-2.08231	0.234	0.86	0.67915-1.08901	0.0429	0.33174	0.268	14.3398	12	0.27954	13.1109	11	0.28614	1.28566e-86	0.051023
ebi-a-GCST90002004	11	0.585	1.04309	0.90125-1.2072	0.823	1.01435	0.89524-1.14930	0.893	1.00849	0.89161-1.14068	0.702	0.92463	0.62620-1.36528	0.839	1.01356	0.89312-1.15025	-0.02973	0.4081	0.484	12.0611	10	0.28099	11.1301	9	0.2669	5.21132e-73	0.050368
ebi-a-GCST90001641	7	0.559	1.55999	0.38679-6.2916	0.779	1.07361	0.65337-1.76413	0.896	1.03121	0.64934-1.63765	0.409	0.65971	0.26329-1.65302	0.356	1.47041	0.69081-3.12981	-0.08508	0.56175	0.153	9.84263	6	0.13144	9.13763	5	0.1037	1.45698e-38	0.0526482
ebi-a-GCST90001531	15	0.676	0.97964	0.89137-1.0767	0.663	0.97856	0.88753-1.07892	0.898	0.9949	0.92031-1.07553	0.978	1.00233	0.85026-1.18160	0.688	0.98181	0.89930-1.07188	0.01832	0.57992	0.683	12.4081	14	0.57357	12.0858	13	0.52062	8.88781e-96	0.0503075
ebi-a-GCST90001451	13	0.305	1.33625	0.78822-2.2653	0.711	0.94689	0.70952-1.26368	0.9	1.01357	0.82183-1.25005	0.736	1.07883	0.70103-1.66024	0.605	0.89822	0.60473-1.33416	-0.0643	0.28725	0.564	10.2302	12	0.59577	8.97957	11	0.62378	1.32969e-99	0.0514678
ebi-a-GCST90001627	22	0.578	0.9239	0.70218-1.2156	0.868	0.98261	0.79869-1.20889	0.902	0.98962	0.83812-1.16851	0.813	0.95871	0.67872-1.35421	0.827	0.97991	0.81877-1.17277	0.02489	0.54082	0.106	31.8952	21	0.06	31.2895	20	0.05148	5.24352e-179	0.0512718
ebi-a-GCST90001767	8	0.987	1.00269	0.73376-1.3702	0.983	0.99775	0.80726-1.23320	0.906	1.01105	0.84232-1.21358	0.868	0.96978	0.68390-1.37516	0.958	0.99402	0.79974-1.23549	0.00398	0.95088	0.697	5.49072	7	0.6003	5.4866	6	0.48308	3.20962e-74	0.0511562
ebi-a-GCST90001983	9	0.267	1.69083	0.72037-3.9687	0.896	1.0271	0.68700-1.53557	0.908	1.02002	0.72978-1.42567	0.757	0.90603	0.49542-1.65693	0.891	0.95829	0.53000-1.73271	-0.09117	0.24987	0.365	9.3575	8	0.31304	7.63953	7	0.36545	7.18443e-52	0.0514728
ebi-a-GCST90001558	10	0.835	1.03645	0.74869-1.4348	0.481	1.08483	0.86490-1.36069	0.908	1.01175	0.83040-1.23271	0.561	0.89142	0.61369-1.29485	0.38	1.10358	0.89509-1.36062	-0.01463	0.85422	0.163	13.64	9	0.13572	13.5788	8	0.09343	4.20561e-76	0.0507743
ebi-a-GCST90001653	14	0.883	1.01827	0.80463-1.2886	0.955	1.00679	0.79608-1.27329	0.911	1.00967	0.85328-1.19472	0.277	1.23885	0.85598-1.79297	0.929	1.01007	0.81441-1.25274	-0.00394	0.91772	0.458	13.9418	13	0.37796	13.9289	12	0.30527	1.00056e-77	0.0505333
ebi-a-GCST90001656	14	0.883	0.98206	0.77602-1.2428	0.957	0.99325	0.77607-1.27121	0.911	0.99042	0.83701-1.17195	0.267	0.8072	0.56191-1.15956	0.926	0.99003	0.80532-1.21710	0.00394	0.91772	0.464	13.9418	13	0.37796	13.9289	12	0.30527	1.00056e-77	0.0505232
ebi-a-GCST90001626	13	0.196	1.53343	0.83491-2.8163	0.314	1.20084	0.84117-1.71429	0.913	0.98392	0.73464-1.31780	0.628	1.13163	0.69523-1.84197	0.376	1.18667	0.82361-1.70979	-0.08265	0.1371	0.272	14.9474	12	0.24432	12.1151	11	0.35506	7.14442e-96	0.0517252
ebi-a-GCST90001838	17	0.962	0.99345	0.76309-1.2934	0.594	0.95142	0.79209-1.14279	0.915	1.00814	0.86933-1.16913	0.436	0.85644	0.58570-1.25231	0.596	0.9525	0.79863-1.13600	0.00603	0.89532	0.258	19.4265	16	0.24717	19.4034	15	0.19603	1.8152e-262	0.0512496
ebi-a-GCST90001497	14	0.76	0.97138	0.80998-1.1649	0.86	0.9855	0.83761-1.15950	0.917	0.99318	0.87255-1.13048	0.846	1.03286	0.74955-1.42327	0.931	0.99339	0.85661-1.15201	0.01471	0.73886	0.98	5.08152	13	0.97335	4.96511	12	0.95913	3.727e-195	0.0505987
ebi-a-GCST90001862	8	0.899	0.9563	0.49415-1.8507	0.472	1.14561	0.79103-1.65912	0.918	0.97929	0.65588-1.46216	0.588	1.14948	0.71043-1.85988	0.696	1.08036	0.74462-1.56748	0.00814	0.92865	0.091	14.717	7	0.0398	14.6956	6	0.02276	7.7979e-40	0.0515041
ebi-a-GCST90001875	12	0.643	0.87567	0.50776-1.5101	0.925	0.98834	0.77506-1.26031	0.919	0.99049	0.82391-1.19076	0.701	0.9351	0.66950-1.30606	0.759	0.9534	0.70778-1.28426	0.0361	0.64786	0.588	9.94473	11	0.53537	9.72303	10	0.46512	1.70359e-80	0.051278
ebi-a-GCST90001956	13	0.601	1.04079	0.89979-1.2039	0.957	1.00287	0.90431-1.11216	0.921	1.00484	0.91387-1.10486	0.757	1.04613	0.79115-1.38328	0.947	1.00367	0.90357-1.11485	-0.02615	0.54532	0.778	10.123	12	0.60517	9.73361	11	0.5545	0	0.0508907
ebi-a-GCST90001747	17	0.989	0.99919	0.89578-1.1145	0.86	0.99027	0.88851-1.10369	0.922	0.99556	0.91070-1.08833	0.937	0.98865	0.74884-1.30526	0.909	0.99441	0.90423-1.09357	-0.00311	0.90538	0.475	18.1826	16	0.31332	18.1649	15	0.2541	7.76639e-114	0.0501518
ebi-a-GCST90001847	15	0.056	0.69778	0.49882-0.9761	0.109	0.80777	0.62214-1.04878	0.922	0.98849	0.78358-1.24700	0.487	1.22276	0.70376-2.12449	0.175	0.83441	0.65090-1.06967	0.11409	0.02578	0.101	21.0259	14	0.10097	14.1389	13	0.36413	1.32581e-132	0.0513685
ebi-a-GCST90001399	11	0.481	1.28084	0.66199-2.4782	0.624	1.08347	0.78665-1.49229	0.923	1.01507	0.75004-1.37374	0.294	1.3568	0.79106-2.32712	0.579	1.10392	0.78723-1.54802	-0.05639	0.45469	0.324	13.0989	10	0.21819	12.2669	9	0.19868	2.37448e-109	0.0516794
ebi-a-GCST90002066	7	0.971	0.9922	0.66602-1.4781	0.925	0.98553	0.72652-1.33690	0.923	1.0115	0.80102-1.27729	0.895	1.02884	0.68652-1.54183	0.981	0.99608	0.73388-1.35197	0.00916	0.91156	0.739	4.04856	6	0.67011	4.03491	5	0.5444	1.0095e-45	0.0505174
ebi-a-GCST90001542	9	0.509	1.05887	0.90130-1.2440	0.947	0.99634	0.89342-1.11113	0.924	0.99339	0.86722-1.13791	0.189	0.76017	0.52281-1.10528	0.938	0.99581	0.89844-1.10372	-0.10459	0.22989	0.326	15.5954	8	0.04855	12.5054	7	0.08512	2.57234e-50	0.0501674
ebi-a-GCST90001863	10	0.777	0.92071	0.52913-1.6021	0.678	1.06568	0.78939-1.43868	0.926	0.9889	0.78220-1.25021	0.956	0.98482	0.57977-1.67285	0.529	0.90161	0.66136-1.22914	0.02295	0.78467	0.301	10.7323	9	0.2945	10.6263	8	0.22379	2.82093e-94	0.0509697
ebi-a-GCST90002036	14	0.414	0.87643	0.64577-1.1895	0.448	1.09772	0.86261-1.39690	0.926	0.9904	0.80745-1.21480	0.177	1.3813	0.88665-2.15192	0.391	1.11974	0.87229-1.43737	0.05634	0.31365	0.098	21.2621	13	0.0679	19.4676	12	0.07785	3.79664e-118	0.0509094
ebi-a-GCST90001597	9	0.578	1.25798	0.58170-2.7205	0.506	0.85211	0.53176-1.36545	0.928	0.98365	0.68947-1.40336	0.439	0.74572	0.36815-1.51051	0.427	0.77715	0.43040-1.40326	-0.07549	0.50399	0.556	7.01438	8	0.53508	6.51833	7	0.48069	2.67664e-64	0.0511874
ebi-a-GCST90001458	11	0.943	1.01257	0.72734-1.4096	0.883	1.01878	0.79597-1.30395	0.928	1.00934	0.82535-1.23435	0.893	0.97001	0.62924-1.49534	0.76	1.03998	0.81416-1.32845	-0.00117	0.98089	0.47	10.3442	10	0.41083	10.3435	9	0.3234	1.21832e-183	0.0510861
ebi-a-GCST90002013	11	0.292	0.91534	0.78402-1.0687	0.642	0.9661	0.83535-1.11733	0.931	0.99405	0.86902-1.13707	0.453	0.90073	0.69296-1.17079	0.522	0.95451	0.83200-1.09506	0.0671	0.11999	0.288	13.4786	10	0.19813	10.151	9	0.3384	2.54525e-100	0.0502994
ebi-a-GCST90001856	16	0.558	0.91823	0.69509-1.2130	0.511	0.93221	0.75608-1.14936	0.931	1.00722	0.85644-1.18454	0.744	0.94295	0.66684-1.33339	0.449	0.91785	0.73929-1.13955	0.03575	0.43364	0.401	16.0471	15	0.37893	15.3352	14	0.35563	1.3719e-193	0.0507687
ebi-a-GCST90001499	14	0.561	1.03932	0.91599-1.1792	0.331	1.06591	0.93726-1.21223	0.931	1.0045	0.90766-1.11167	0.862	0.97349	0.72333-1.31016	0.308	1.0682	0.94568-1.20660	-0.03432	0.39294	0.404	11.7602	13	0.5474	10.975	12	0.53107	6.94947e-185	0.0502508
ebi-a-GCST90001534	9	0.274	1.31287	0.83768-2.0576	0.296	0.80574	0.53746-1.20793	0.931	1.01244	0.76427-1.34119	0.42	0.73043	0.35397-1.50726	0.42	0.71563	0.33071-1.54855	-0.07499	0.20282	0.256	9.10249	8	0.33372	7.10031	7	0.41851	4.46985e-54	0.0506272
ebi-a-GCST90001885	12	0.93	0.99211	0.83598-1.1774	0.945	1.00545	0.86113-1.17396	0.932	1.00587	0.88000-1.14974	0.53	1.1241	0.78955-1.60039	0.867	1.01406	0.86455-1.18942	0.00888	0.80588	0.979	4.32145	11	0.95955	4.25777	10	0.93497	3.15964e-83	0.0502353
ebi-a-GCST90002030	14	0.182	1.38115	0.88391-2.1581	0.649	1.05064	0.84916-1.29994	0.933	1.00708	0.85348-1.18833	0.62	1.08253	0.79694-1.47046	0.535	1.06618	0.87541-1.29853	-0.11448	0.16111	0.85	8.39011	13	0.81729	6.15938	12	0.90784	7.22996e-207	0.050776
ebi-a-GCST90001923	5	0.737	2.88651	0.01028-810.5401	0.697	0.84329	0.35785-1.98725	0.933	1.03295	0.48294-2.20937	0.658	1.30527	0.43723-3.89665	0.903	0.94583	0.40831-2.19098	-0.14415	0.74169	0.246	6.863	4	0.14331	6.57653	3	0.08669	1.90953e-24	0.0522954
ebi-a-GCST90001835	9	0.799	1.05987	0.68904-1.6303	0.808	1.04407	0.73789-1.47729	0.934	1.0115	0.77010-1.32857	0.528	1.17826	0.72331-1.91939	0.781	1.05095	0.74843-1.47576	-0.01605	0.79146	0.986	2.24115	8	0.97271	2.16568	7	0.9501	4.28091e-48	0.0505528
ebi-a-GCST90001651	13	0.763	0.93061	0.58948-1.4692	0.62	1.10614	0.74252-1.64783	0.936	1.01073	0.77848-1.31227	0.374	1.37222	0.70073-2.68715	0.46	1.17161	0.78041-1.75890	0.02072	0.671	0.512	11.6373	12	0.47523	11.4393	11	0.40723	4.13551e-66	0.0505313
ebi-a-GCST90002042	10	0.873	0.94722	0.49677-1.8061	0.956	0.99119	0.72316-1.35854	0.939	1.00942	0.79360-1.28393	0.986	0.99535	0.59957-1.65238	0.941	0.98189	0.61166-1.57622	0.0163	0.84033	0.833	4.79832	9	0.85152	4.755	8	0.78341	2.68419e-58	0.050768
ebi-a-GCST90001481	21	0.962	0.99771	0.90867-1.0955	0.909	0.99402	0.89703-1.10150	0.94	1.0029	0.93010-1.08139	0.963	1.00442	0.83504-1.20817	0.975	0.99861	0.91545-1.08933	0.0065	0.8563	0.906	12.5496	20	0.89586	12.516	19	0.8624	3.76552e-260	0.0501376
ebi-a-GCST90001459	14	0.863	0.96293	0.63267-1.4656	0.572	1.09046	0.80741-1.47273	0.941	0.99135	0.78608-1.25022	0.349	1.35265	0.73587-2.48640	0.475	1.12896	0.81696-1.56011	0.00817	0.87107	0.32	15.4929	13	0.2776	15.4574	12	0.21737	2.44933e-177	0.0509036
ebi-a-GCST90002106	11	0.432	1.10713	0.86882-1.4108	0.831	1.01592	0.87900-1.17419	0.942	1.00533	0.87054-1.16098	0.491	0.90356	0.68410-1.19343	0.631	1.04247	0.88428-1.22896	-0.05427	0.35693	0.246	13.8327	10	0.18076	12.5211	9	0.1855	0	0.0506068
ebi-a-GCST90001666	29	0.917	0.99754	0.95291-1.0443	0.919	1.003	0.94665-1.06271	0.944	1.00148	0.96119-1.04347	0.114	0.91987	0.83200-1.01702	0.821	1.00541	0.95989-1.05308	0.00904	0.70559	0.539	27.0964	28	0.513	26.9506	27	0.46646	2.45684e-202	0.0500298
ebi-a-GCST90002019	9	0.964	1.00974	0.67497-1.5106	0.795	1.03163	0.81607-1.30412	0.945	1.00643	0.83896-1.20734	0.289	0.80014	0.54460-1.17558	0.703	1.06395	0.78271-1.44623	-0.00113	0.98621	0.706	5.50882	8	0.70206	5.5085	7	0.59816	1.44918e-50	0.0503157
ebi-a-GCST90001572	8	0.179	0.54321	0.24734-1.1930	0.849	1.0533	0.61625-1.80030	0.948	0.98578	0.63917-1.52035	0.781	1.12149	0.51489-2.44273	0.846	1.08519	0.49050-2.40085	0.11506	0.13974	0.228	9.0405	7	0.24976	6.09794	6	0.41231	7.31254e-47	0.0507139
ebi-a-GCST90001587	10	0.269	1.32512	0.83275-2.1086	0.63	1.0911	0.76501-1.55619	0.949	1.00891	0.77044-1.32119	0.892	0.9633	0.56960-1.62912	0.485	1.15321	0.78548-1.69310	-0.07047	0.19542	0.83	4.90158	9	0.8428	2.9056	8	0.94014	1.56313e-111	0.0505941
ebi-a-GCST90001554	14	0.908	1.0178	0.75986-1.3633	0.921	1.01347	0.77684-1.32217	0.949	1.00608	0.83419-1.21339	0.878	1.03569	0.66671-1.60888	0.909	1.01639	0.77359-1.33538	-0.00339	0.92109	0.849	8.55445	13	0.8057	8.54421	12	0.74129	7.32811e-81	0.0502196
ebi-a-GCST90001775	13	0.78	1.02511	0.86518-1.2146	0.565	0.9544	0.81429-1.11862	0.95	1.00449	0.87239-1.15659	0.208	0.7352	0.46755-1.15607	0.621	0.96094	0.82397-1.12068	-0.01925	0.65441	0.354	15.0709	12	0.23758	14.7863	11	0.19249	8.29752e-103	0.0501411
ebi-a-GCST90002102	15	0.915	1.00787	0.87540-1.1604	0.553	1.03624	0.92127-1.16556	0.953	0.99714	0.90705-1.09617	0.928	0.99078	0.81392-1.20607	0.455	1.04106	0.93958-1.15349	-0.01341	0.83886	0.113	21.459	14	0.09044	21.3881	13	0.0656	3.54331e-135	0.0500895
ebi-a-GCST90001808	21	0.581	0.90241	0.63031-1.2920	0.6	0.94398	0.76102-1.17092	0.955	1.00523	0.83996-1.20303	0.31	0.84715	0.61995-1.15761	0.393	0.92095	0.76537-1.10816	0.03832	0.50228	0.14	28.8195	20	0.09138	28.127	19	0.08101	0	0.0506057
ebi-a-GCST90001839	10	0.858	0.94898	0.54500-1.6524	0.738	0.94378	0.67257-1.32436	0.955	1.00745	0.78010-1.30105	0.641	1.16987	0.61826-2.21364	0.323	0.80873	0.54324-1.20397	0.01348	0.81778	0.535	6.95726	9	0.64157	6.90056	8	0.5474	3.22837e-86	0.0504006
ebi-a-GCST90001951	12	0.86	1.01863	0.83398-1.2442	0.989	1.00097	0.87568-1.14418	0.957	0.99686	0.89001-1.11654	0.754	0.95549	0.72416-1.26072	0.946	0.99551	0.87582-1.13155	-0.01222	0.80238	0.956	5.09226	11	0.92662	5.0262	10	0.88942	5.49107e-260	0.0502919
ebi-a-GCST90001425	15	0.785	1.04869	0.75065-1.4651	0.624	0.91655	0.64719-1.29801	0.957	0.99344	0.78105-1.26358	0.385	1.27143	0.75226-2.14889	0.867	1.03352	0.70710-1.51062	-0.01902	0.65537	0.794	9.96472	14	0.76476	9.75607	13	0.71375	6.33556e-78	0.0502314
ebi-a-GCST90001478	10	0.806	1.03337	0.80200-1.3315	0.913	0.98761	0.78945-1.23552	0.961	1.00438	0.84297-1.19669	0.993	1.00157	0.70506-1.42277	0.698	0.95968	0.78460-1.17383	-0.01762	0.7685	0.873	4.377	9	0.8849	4.28426	8	0.83061	1.85896e-58	0.0500818
ebi-a-GCST90001792	10	0.895	1.03396	0.64079-1.6684	0.734	1.0548	0.77580-1.43412	0.963	1.00554	0.79857-1.26614	0.584	1.15669	0.70034-1.91042	0.43	1.1519	0.82355-1.61117	-0.00761	0.89954	0.762	5.44348	9	0.79406	5.42651	8	0.71117	3.25882e-104	0.0502146
ebi-a-GCST90001473	11	0.582	0.94709	0.78571-1.1416	0.826	1.02201	0.84161-1.24107	0.964	0.99662	0.86141-1.15305	0.603	1.10325	0.77069-1.57930	0.955	0.99515	0.84428-1.17297	0.03583	0.41455	0.834	4.73983	10	0.90787	4.00822	9	0.91087	0	0.0502249
ebi-a-GCST90001861	17	0.461	0.85175	0.56189-1.2911	0.714	0.95686	0.75600-1.21109	0.964	1.00486	0.81522-1.23861	0.851	1.04637	0.65617-1.66861	0.404	0.89812	0.70260-1.14803	0.06082	0.38089	0.061	25.5261	16	0.06107	24.2105	15	0.0616	8.8452e-180	0.050329
ebi-a-GCST90001762	15	0.845	0.98587	0.85733-1.1337	0.768	0.98398	0.88394-1.09534	0.965	1.00249	0.89646-1.12105	0.268	1.22941	0.86522-1.74688	0.772	0.98533	0.89332-1.08681	0.01309	0.68508	0.306	20.4915	14	0.11539	20.2238	13	0.08977	3.29808e-102	0.0500434
ebi-a-GCST90001419	7	0.706	0.94843	0.73153-1.2296	0.731	0.95835	0.75182-1.22162	0.969	0.99599	0.81270-1.22062	0.954	1.01503	0.62485-1.64886	0.668	0.95043	0.76179-1.18577	0.03023	0.54356	0.538	6.0273	6	0.42014	5.55586	5	0.35186	1.67654e-35	0.0500399
ebi-a-GCST90001841	14	0.94	0.99018	0.77144-1.2710	0.487	1.06723	0.88824-1.28229	0.97	1.00329	0.84663-1.18895	0.69	1.0819	0.74087-1.57991	0.768	1.02407	0.87735-1.19533	0.0073	0.88631	0.093	23.4276	13	0.03682	23.386	12	0.02462	2.37767e-202	0.0501665
ebi-a-GCST90001901	15	0.333	1.08696	0.92399-1.2787	0.554	1.05306	0.88716-1.24998	0.97	0.99727	0.86529-1.14938	0.938	1.01324	0.73217-1.40220	0.542	1.04931	0.90217-1.22044	-0.07199	0.09776	0.324	17.4876	14	0.23113	14.0481	13	0.37047	7.12283e-91	0.0500623
ebi-a-GCST90001646	20	0.639	1.03325	0.90351-1.1816	0.93	1.00624	0.87533-1.15672	0.972	1.00187	0.90437-1.10987	0.755	0.9633	0.76440-1.21395	0.63	1.03327	0.90636-1.17795	-0.02453	0.4947	0.733	15.2195	19	0.70855	14.7337	18	0.68017	1.6238e-126	0.0500294
ebi-a-GCST90001842	21	0.933	0.99154	0.81546-1.2056	0.251	0.89657	0.74404-1.08038	0.972	0.99772	0.87934-1.13205	0.981	1.00412	0.72380-1.39300	0.481	0.9418	0.79949-1.10945	0.00273	0.93453	0.336	21.6458	20	0.36003	21.6379	19	0.30264	0	0.0501221
ebi-a-GCST90001780	13	0.582	1.12928	0.74191-1.7189	0.7	0.93397	0.65997-1.32173	0.973	0.99527	0.75796-1.30687	0.669	0.8896	0.52687-1.50208	0.6	0.89898	0.61004-1.32478	-0.04875	0.44982	0.154	16.9484	12	0.15155	16.0523	11	0.1392	6.11838e-91	0.0501408
ebi-a-GCST90001804	18	0.262	0.83571	0.61737-1.1313	0.662	0.9559	0.78074-1.17035	0.973	0.99744	0.85809-1.15942	0.802	0.95467	0.66785-1.36466	0.67	0.95467	0.77422-1.17716	0.06436	0.20555	0.547	16.5837	17	0.4829	14.8424	16	0.53621	0	0.0501355
ebi-a-GCST90001890	10	0.126	0.70176	0.46731-1.0539	0.658	0.93757	0.70468-1.24744	0.974	0.99638	0.80054-1.24013	0.992	1.0025	0.61326-1.63879	0.643	0.92139	0.65931-1.28766	0.10363	0.07992	0.501	8.3039	9	0.50383	4.28466	8	0.83057	5.98898e-103	0.050111
ebi-a-GCST90001592	14	0.578	0.91548	0.67652-1.2388	0.517	0.92075	0.71743-1.18168	0.976	1.0028	0.83766-1.20049	0.77	1.07148	0.68159-1.68439	0.428	0.89504	0.68645-1.16702	0.02713	0.4768	0.76	8.75453	13	0.79122	8.21517	12	0.7681	7.95489e-78	0.0500419
ebi-a-GCST90001493	17	0.665	0.97258	0.85979-1.1002	0.384	0.94107	0.82068-1.07912	0.977	0.99855	0.90626-1.10025	0.532	1.11119	0.80387-1.53600	0.28	0.92741	0.81273-1.05827	0.0228	0.50741	0.361	15.4147	16	0.4945	14.9535	15	0.45477	4.1097e-203	0.0500281
ebi-a-GCST90001828	19	0.852	1.02779	0.77417-1.3645	0.409	1.09674	0.88089-1.36547	0.977	0.99757	0.84663-1.17543	0.801	1.05563	0.69765-1.59728	0.441	1.09325	0.87567-1.36489	-0.00976	0.8005	0.411	19.1805	18	0.38079	19.1065	17	0.32245	2.67109e-188	0.0500706
ebi-a-GCST90002104	9	0.546	0.94121	0.78067-1.1348	0.913	1.00874	0.86239-1.17992	0.977	0.99823	0.88399-1.12724	0.914	1.01265	0.81254-1.26204	0.927	1.00706	0.87007-1.16562	0.0495	0.44401	0.553	7.49777	8	0.484	6.83988	7	0.44574	3.95919e-217	0.0500508
ebi-a-GCST90001644	23	0.598	0.92726	0.70321-1.2227	0.165	0.85261	0.68082-1.06774	0.979	0.99772	0.84427-1.17906	0.499	1.16357	0.75542-1.79222	0.22	0.82	0.60273-1.11559	0.02118	0.51889	0.416	22.8371	22	0.41098	22.3784	21	0.37799	9.54503e-141	0.0500484
ebi-a-GCST90001751	16	0.307	1.69223	0.63939-4.4787	0.62	0.91141	0.63148-1.31542	0.979	1.0042	0.73710-1.36809	0.46	0.78738	0.42456-1.46029	0.653	0.88706	0.53139-1.48077	-0.09861	0.28678	0.041	25.4103	15	0.0447	23.3637	14	0.0546	5.77712e-117	0.0501404
ebi-a-GCST90001424	10	0.984	0.99865	0.88045-1.1327	0.956	0.99612	0.86757-1.14371	0.979	0.99853	0.89402-1.11526	0.656	1.08366	0.77026-1.52459	0.778	0.98286	0.87446-1.10470	-0.00013	0.99685	0.64	5.82165	9	0.75763	5.82163	8	0.6672	1.26277e-60	0.0500091
ebi-a-GCST90001446	6	0.945	1.09791	0.09101-13.2444	0.944	0.96736	0.38094-2.45652	0.98	0.98842	0.39936-2.44635	0.731	1.27725	0.34197-4.77057	0.408	1.58926	0.58125-4.34533	-0.01953	0.93224	0.165	10.3385	5	0.06619	10.3174	4	0.03541	7.49437e-31	0.0502929
ebi-a-GCST90001609	6	0.113	0.21202	0.04719-0.9526	0.258	0.71312	0.39708-1.28070	0.981	1.00744	0.55470-1.82970	0.374	0.68252	0.31666-1.47110	0.279	0.66692	0.34671-1.28286	0.29403	0.09978	0.12	9.56854	5	0.08843	4.47488	4	0.34554	2.58578e-37	0.0501461
ebi-a-GCST90002069	12	0.86	0.94369	0.50451-1.7652	0.936	0.9866	0.70986-1.37124	0.981	0.9972	0.79187-1.25578	0.448	1.27016	0.69982-2.30530	0.281	0.77328	0.49591-1.20579	0.01264	0.85642	0.581	8.49309	11	0.66857	8.45862	10	0.58413	5.1602e-100	0.0500647
ebi-a-GCST90001802	17	0.604	0.88297	0.55683-1.4001	0.779	0.96524	0.75353-1.23643	0.981	0.99748	0.80629-1.23401	0.486	0.86644	0.58438-1.28465	0.778	0.96456	0.75347-1.23479	0.03385	0.56542	0.199	22.0965	16	0.1401	21.599	15	0.11876	1.45011e-234	0.0500916
ebi-a-GCST90001880	13	0.61	0.95672	0.81087-1.1288	0.516	0.96718	0.87456-1.06961	0.982	1.00126	0.89787-1.11657	0.716	0.96454	0.79781-1.16611	0.601	0.97455	0.88715-1.07056	0.03473	0.48156	0.192	21.1086	12	0.04881	20.1372	11	0.04349	8.43791e-89	0.0500247
ebi-a-GCST90001774	8	0.401	0.67928	0.29360-1.5716	0.397	1.20376	0.78368-1.84901	0.983	0.99565	0.67327-1.47240	0.598	1.22865	0.59137-2.55268	0.335	1.30464	0.78831-2.15917	0.12827	0.35163	0.152	10.9314	7	0.14164	9.34386	6	0.15514	1.00787e-49	0.0500661
ebi-a-GCST90001827	11	0.968	0.99106	0.65068-1.5095	0.448	1.08282	0.88155-1.33005	0.984	0.99779	0.80878-1.23097	0.241	0.76555	0.50310-1.16494	0.567	1.06506	0.86429-1.31246	0.0025	0.97123	0.218	14.739	10	0.14187	14.7367	9	0.09843	3.07089e-146	0.050047
ebi-a-GCST90001552	16	0.827	1.013	0.90413-1.1350	0.764	1.02003	0.89595-1.16129	0.984	0.99891	0.90054-1.10804	0.579	0.92706	0.71372-1.20418	0.683	1.02394	0.91619-1.14437	-0.01485	0.5658	0.981	6.27844	15	0.97468	5.93252	14	0.96816	9.93804e-85	0.0500072
ebi-a-GCST90001460	14	0.873	0.9789	0.75776-1.2646	0.574	0.93997	0.75764-1.16619	0.984	0.99818	0.83562-1.19236	0.904	1.0213	0.72960-1.42962	0.535	0.9407	0.77940-1.13540	0.00869	0.83301	0.324	16.4183	13	0.22728	16.355	12	0.17551	1.24666e-80	0.05002
ebi-a-GCST90001957	13	0.708	1.02881	0.89034-1.1888	0.954	1.00306	0.90341-1.11370	0.985	1.00092	0.91076-1.10000	0.705	1.05491	0.80477-1.38281	0.943	1.00358	0.91171-1.10472	-0.01997	0.63236	0.856	8.75577	12	0.72364	8.51367	11	0.66668	0	0.0500322
ebi-a-GCST90001594	10	0.75	1.08844	0.65787-1.8008	0.892	0.97761	0.70403-1.35750	0.985	1.00245	0.77352-1.29913	0.427	0.84827	0.57575-1.24978	0.805	0.95809	0.68887-1.33252	-0.02746	0.71311	0.487	9.4311	9	0.39847	9.26301	8	0.3206	2.45428e-67	0.050028
ebi-a-GCST90001643	18	0.538	0.95998	0.84529-1.0902	0.711	0.97278	0.84066-1.12567	0.987	1.00084	0.90212-1.11036	0.95	0.99198	0.77538-1.26909	0.527	0.96047	0.84977-1.08558	0.03356	0.28295	0.628	14.4493	17	0.63508	13.2148	16	0.65699	1.80465e-109	0.0500052
ebi-a-GCST90001854	11	0.985	1.00319	0.73180-1.3752	0.278	0.88999	0.72089-1.09875	0.988	0.99871	0.84757-1.17680	0.385	0.82672	0.54849-1.24606	0.271	0.86676	0.68140-1.10256	-0.00205	0.97422	0.237	12.3701	10	0.26105	12.3686	9	0.19332	2.42538e-197	0.0500247
ebi-a-GCST90001903	11	0.248	1.34508	0.84067-2.1522	0.6	1.08384	0.80219-1.46438	0.989	1.0017	0.79170-1.26740	0.478	0.82482	0.49427-1.37644	0.864	1.03049	0.73661-1.44162	-0.11375	0.18935	0.563	8.86481	10	0.54498	6.84882	9	0.65286	1.02384e-115	0.0500275
ebi-a-GCST90001486	5	0.785	0.95749	0.71969-1.2739	0.954	0.99531	0.84961-1.16600	0.99	0.9989	0.83674-1.19248	0.638	1.06485	0.83570-1.35682	0.977	0.99751	0.85258-1.16708	0.05653	0.7122	0.287	7.06805	4	0.13234	6.70053	3	0.08208	9.39349e-30	0.0500027
ebi-a-GCST90001433	14	0.591	1.20387	0.62358-2.3241	0.85	1.03064	0.75386-1.40904	0.991	1.00133	0.79368-1.26331	0.809	1.06013	0.66670-1.68574	0.798	1.04969	0.72937-1.51068	-0.04544	0.56828	0.989	4.74081	13	0.98046	4.39659	12	0.97517	1.70293e-104	0.0500124
ebi-a-GCST90001766	9	0.589	0.9359	0.74407-1.1772	0.893	0.98517	0.79223-1.22509	0.993	0.99922	0.83992-1.18873	0.937	1.0144	0.71759-1.43399	0.905	0.9868	0.79867-1.21925	0.03691	0.42022	0.915	3.77106	8	0.87717	3.03795	7	0.88147	2.8875e-61	0.0500026
ebi-a-GCST90001859	10	0.484	0.93606	0.78454-1.1168	0.997	1.00028	0.84946-1.17788	0.993	1.00054	0.87934-1.13844	0.617	1.07433	0.81897-1.40931	0.868	0.9867	0.84674-1.14979	0.0402	0.30992	0.692	6.76314	9	0.66176	5.58794	8	0.69328	5.76713e-110	0.0500026
ebi-a-GCST90001414	9	0.627	0.91373	0.64531-1.2938	0.471	0.89288	0.65619-1.21494	0.994	0.99903	0.78121-1.27760	0.609	1.12284	0.73269-1.72074	0.625	0.91709	0.65690-1.28035	0.03433	0.49988	0.672	6.20933	8	0.6238	5.70332	7	0.57479	7.72876e-45	0.0500029
ebi-a-GCST90002041	10	0.432	1.33832	0.67094-2.6695	0.938	1.01531	0.69367-1.48609	0.995	0.99906	0.75306-1.32541	0.747	0.90747	0.51250-1.60682	0.758	0.91957	0.54813-1.54272	-0.08339	0.38962	0.655	6.96984	9	0.64026	6.14249	8	0.63127	2.20766e-54	0.050007
ebi-a-GCST90001948	16	0.671	1.03429	0.88798-1.2047	0.963	1.00257	0.89890-1.11819	0.998	1.00012	0.90933-1.09997	0.775	0.96558	0.76279-1.22229	0.909	1.00669	0.89943-1.12675	-0.01968	0.58933	0.975	7.69725	15	0.93535	7.39202	14	0.91854	0	0.0500006

## Sheet: S1.2_UK-Biobank
S1.2. The resluts of forward univariable MR analysis between immune cells phenotypes and the risk of HCC in UK Bio-Bank database.
id	nsnp	MR-Egger			Weighted median			Inverse variance weighted			Simple mode			Weighted mode			MR-Egger intercept		MR-PRESSO global	MR-IVW			MR-Egeer			steiger_test_pval	power
		p_value	OR	95% OR	p_value	OR	95% OR	p_value	OR	95% OR	p_value	OR	95% OR	p_value	OR	95% OR	egger intercept	p_value	p_value	Q	Q_df	Q_pval	Q	Q_df	Q_pval
ebi-a-GCST90002039	18	0.649	0.87842	0.50788-1.5193	0.161	0.70295	0.42945-1.15063	0.002	0.55049	0.37682-0.80421	0.202	0.60044	0.28290-1.27438	0.244	0.72242	0.42605-1.22494	-0.17876	0.04329	0.356	19.3862	17	0.30682	14.5695	16	0.55637	4.2932e-256	0.81383
ebi-a-GCST90001408	24	0.001	2.58157	1.57462-4.2325	0.013	1.92886	1.14991-3.23547	0.002	1.70257	1.21080-2.39407	0.14	1.96751	0.82691-4.68141	0.008	2.08678	1.26963-3.42986	-0.14372	0.03776	0.409	24.6936	23	0.36627	19.8064	22	0.59515	1.56694e-130	0.860411
ebi-a-GCST90001659	22	0.192	0.71647	0.44165-1.1623	0.455	0.83999	0.53140-1.32778	0.005	0.63685	0.46333-0.87536	0.681	0.86176	0.42799-1.73515	0.332	0.79355	0.50259-1.25294	-0.04623	0.52917	0.401	22.1914	21	0.38855	21.7455	20	0.35448	7.70968e-198	0.487946
ebi-a-GCST90001665	21	0.081	0.83587	0.69062-1.0117	0.109	0.83161	0.66371-1.04198	0.008	0.79881	0.67622-0.94362	0.266	0.80032	0.54634-1.17237	0.089	0.84155	0.69641-1.01695	-0.04542	0.35201	0.631	18.5766	20	0.54948	17.6663	19	0.54482	8.35173e-146	0.15505
ebi-a-GCST90001406	26	0.001	0.40406	0.24650-0.6623	0.014	0.5191	0.30750-0.87632	0.009	0.62777	0.44263-0.89036	0.104	0.42744	0.15912-1.14822	0.008	0.46641	0.27808-0.78228	0.14912	0.02967	0.254	29.1584	25	0.25735	23.813	24	0.47233	8.02629e-144	0.391343
ebi-a-GCST90001786	19	0.171	1.82196	0.80118-4.1433	0.073	1.70089	0.95096-3.04224	0.01	1.78177	1.14838-2.76450	0.084	2.25053	0.94220-5.37562	0.122	1.84276	0.88053-3.85654	-0.0053	0.95052	0.926	10.8852	18	0.89917	10.8812	17	0.86267	1.75607e-118	0.897078
ebi-a-GCST90001760	18	0.114	1.45287	0.93725-2.2522	0.067	1.52439	0.97127-2.39252	0.014	1.49534	1.08524-2.06041	0.035	2.69884	1.15718-6.29438	0.053	1.54372	1.02557-2.32367	0.01356	0.84728	0.36	20.1848	17	0.26488	20.1366	16	0.21413	9.05939e-112	0.514405
ebi-a-GCST90001858	29	0.613	1.09247	0.77828-1.5335	0.768	1.04851	0.76500-1.43708	0.017	1.31939	1.05110-1.65618	0.418	1.29607	0.69818-2.40596	0.662	1.06839	0.79700-1.43219	0.07748	0.15306	0.378	27.9717	28	0.46595	25.8102	27	0.52915	0	0.646801
ebi-a-GCST90001411	13	0.15	0.39829	0.12419-1.2773	0.085	0.50061	0.22782-1.10007	0.017	0.48974	0.27261-0.87980	0.163	0.43075	0.14172-1.30924	0.097	0.49138	0.22679-1.06462	0.05415	0.69159	0.342	14.4008	12	0.27585	14.1868	11	0.22283	2.85595e-65	0.358699
ebi-a-GCST90001547	18	0.161	0.63564	0.34725-1.1635	0.13	0.61402	0.32638-1.15515	0.018	0.60365	0.39692-0.91805	0.205	0.53104	0.20711-1.36160	0.136	0.61268	0.33156-1.13215	-0.01499	0.81924	0.968	8.8885	17	0.9437	8.83453	16	0.92007	8.97502e-100	0.342325
ebi-a-GCST90001392	26	0.07	0.80379	0.64149-1.0071	0.165	0.82446	0.62778-1.08275	0.02	0.79114	0.64928-0.96399	0.01	0.41523	0.22345-0.77161	0.072	0.80254	0.63800-1.00953	-0.01424	0.77398	0.605	24.3027	25	0.50194	24.2176	24	0.44921	4.91411e-142	0.155238
ebi-a-GCST90001584	21	0.098	1.5016	0.95013-2.3731	0.093	1.49205	0.93574-2.37908	0.021	1.47183	1.05881-2.04596	0.095	1.86629	0.92873-3.75031	0.128	1.46192	0.91529-2.33499	-0.00744	0.90302	0.955	10.9441	20	0.94766	10.9288	19	0.92621	2.94974e-150	0.582884
ebi-a-GCST90001794	24	0.016	0.74253	0.59318-0.9295	0.229	0.85049	0.65340-1.10704	0.023	0.80229	0.66392-0.96949	0.31	0.79073	0.50750-1.23201	0.146	0.83692	0.66360-1.05550	0.07453	0.22239	0.92	14.8267	23	0.90074	13.2498	22	0.92596	1.2025e-160	0.154392
ebi-a-GCST90001559	17	0.179	1.45378	0.86458-2.4445	0.291	1.30395	0.79681-2.13386	0.023	1.4966	1.05829-2.11646	0.01	2.91251	1.41473-5.99597	0.32	1.30157	0.78644-2.15410	0.01052	0.88514	0.979	6.67734	16	0.97899	6.65575	15	0.96651	8.84948e-93	0.467815
ebi-a-GCST90001802	25	0.364	0.7563	0.41858-1.3665	0.547	0.87429	0.56482-1.35332	0.023	0.69518	0.50838-0.95062	0.428	0.74542	0.36468-1.52367	0.425	0.83478	0.53996-1.29056	-0.02339	0.74515	0.814	18.1104	24	0.79762	18.0022	23	0.75737	1.44356e-288	0.452093
ebi-a-GCST90001679	15	0.222	0.69095	0.39259-1.2161	0.057	0.6093	0.36615-1.01394	0.024	0.65393	0.45260-0.94483	0.175	0.56694	0.26050-1.23387	0.116	0.56694	0.29171-1.10183	-0.02166	0.80539	0.946	7.17505	14	0.92775	7.11182	13	0.8963	4.5932e-79	0.242955
ebi-a-GCST90002030	19	0.005	0.23433	0.09636-0.5699	0.019	0.53049	0.31285-0.89951	0.025	0.63977	0.43287-0.94555	0.163	0.53512	0.23030-1.24339	0.049	0.52983	0.29380-0.95546	0.31327	0.02458	0.878	12.0998	18	0.84204	6.01707	17	0.99307	2.12026e-159	0.461839
ebi-a-GCST90002089	17	0.105	1.66317	0.93265-2.9659	0.13	1.42005	0.90195-2.23577	0.025	1.50389	1.05140-2.15113	0.434	1.35778	0.64356-2.86462	0.147	1.4084	0.90723-2.18644	-0.03808	0.66512	0.206	21.4585	16	0.16155	21.1832	15	0.13108	7.27766e-105	0.59553
ebi-a-GCST90001809	18	0.751	1.22762	0.35321-4.2667	0.023	2.43731	1.12867-5.26328	0.028	1.996	1.07603-3.70251	0.128	3.77001	0.74300-19.12924	0.094	3.41734	0.87733-13.31110	0.10254	0.39052	0.064	26.8686	17	0.06002	25.6212	16	0.0596	1.38665e-85	0.946488
ebi-a-GCST90001867	26	0.292	1.30498	0.80423-2.1175	0.511	1.17786	0.72315-1.91851	0.03	1.40417	1.03303-1.90864	0.969	1.01632	0.45529-2.26866	0.606	1.13525	0.70498-1.82814	0.02451	0.70463	0.782	19.3471	25	0.78018	19.1999	24	0.74124	1.28079e-150	0.534052
ebi-a-GCST90001404	23	0.022	0.62607	0.43203-0.9073	0.078	0.68942	0.45587-1.04261	0.031	0.7372	0.55905-0.97211	0.679	0.86677	0.44383-1.69272	0.11	0.72294	0.49322-1.05964	0.07809	0.2092	0.67	19.1816	22	0.63409	17.5032	21	0.68019	3.11216e-118	0.191961
ebi-a-GCST90001728	18	0.474	1.14247	0.80019-1.6311	0.114	1.2948	0.93965-1.78418	0.033	1.2895	1.02045-1.62950	0.377	1.24037	0.77917-1.97455	0.125	1.32663	0.94078-1.87074	0.08826	0.38972	0.853	11.3904	17	0.83557	10.6087	16	0.83297	4.44316e-112	0.34646
ebi-a-GCST90002088	25	0.313	1.25735	0.81358-1.9432	0.119	1.3657	0.92272-2.02135	0.034	1.37593	1.02436-1.84818	0.459	0.78881	0.42511-1.46367	0.308	1.29472	0.79606-2.10574	0.04054	0.58633	0.84	17.8044	24	0.81239	17.4998	23	0.78403	1.46491e-171	0.524988
ebi-a-GCST90001657	11	0.188	0.49413	0.18731-1.3035	0.094	0.4969	0.21910-1.12691	0.036	0.52047	0.28252-0.95883	0.428	0.59308	0.17181-2.04722	0.216	0.52319	0.20025-1.36688	0.014	0.89548	0.697	7.61891	10	0.66601	7.60065	9	0.57484	9.80559e-55	0.294065
ebi-a-GCST90001641	16	0.299	0.70955	0.38046-1.3233	0.112	0.59842	0.31773-1.12707	0.037	0.64049	0.42164-0.97294	0.375	0.62447	0.22776-1.71214	0.164	0.51608	0.21288-1.25111	-0.03764	0.66752	0.513	14.5525	15	0.48411	14.3551	14	0.42361	1.10085e-78	0.232237
ebi-a-GCST90001770	6	0.167	2.70048	0.85227-8.5567	0.292	1.63532	0.65565-4.07879	0.041	2.04464	1.03059-4.05647	0.626	1.40562	0.38816-5.09013	0.455	1.5559	0.53335-4.53889	-0.07416	0.58828	0.777	2.52944	5	0.77205	2.18399	4	0.70196	4.80097e-31	0.612876
ebi-a-GCST90001796	12	0.48	1.39833	0.57098-3.4245	0.449	1.32331	0.64097-2.73201	0.042	1.68652	1.01918-2.79082	0.674	1.25346	0.44981-3.49298	0.526	1.28624	0.60591-2.73043	0.04649	0.63068	0.939	4.90943	11	0.93547	4.66351	10	0.91249	6.28008e-57	0.516796
ebi-a-GCST90001596	24	0.534	0.86249	0.54503-1.3649	0.225	0.75043	0.47183-1.19354	0.043	0.69744	0.49186-0.98894	0.016	0.33809	0.14898-0.76728	0.238	0.77621	0.51517-1.16950	-0.11203	0.18627	0.122	32.6249	23	0.08783	30.08	22	0.11653	3.92462e-135	0.265753
ebi-a-GCST90001527	24	0.011	0.70316	0.54798-0.9023	0.116	0.78779	0.58528-1.06038	0.043	0.81489	0.66825-0.99371	0.078	0.57618	0.32071-1.03516	0.054	0.77238	0.60165-0.99155	0.09077	0.07432	0.49	23.5913	23	0.42672	20.0805	22	0.578	2.66456e-157	0.208323
ebi-a-GCST90001651	22	0.542	1.15682	0.72989-1.8335	0.345	1.26725	0.77526-2.07148	0.045	1.40718	1.00804-1.96436	0.133	2.0419	0.83368-5.00114	0.376	1.23755	0.78011-1.96321	0.07052	0.24064	0.666	17.609	21	0.6736	16.1465	20	0.7075	1.6082e-109	0.368284
ebi-a-GCST90001979	17	0.093	1.28452	0.97736-1.6882	0.127	1.2359	0.94167-1.62207	0.047	1.22797	1.00281-1.50369	0.912	1.02786	0.63677-1.65915	0.091	1.25568	0.98008-1.60877	-0.03235	0.63744	0.63	14.3436	16	0.57314	14.1122	15	0.51704	0	0.455861
ebi-a-GCST90001473	14	0.114	0.71915	0.49235-1.0504	0.095	0.73589	0.51347-1.05465	0.047	0.75129	0.56632-0.99667	0.545	0.81239	0.42217-1.56329	0.096	0.72823	0.51502-1.02970	0.0294	0.74008	0.775	10.2077	13	0.67687	10.0924	12	0.60785	0	0.38115
ebi-a-GCST90001519	17	0.786	1.07112	0.65772-1.7444	0.162	1.32962	0.89175-1.98249	0.048	1.3431	1.00289-1.79870	0.338	1.34908	0.74430-2.44527	0.306	1.34908	0.77474-2.34919	0.08891	0.27394	0.951	7.85847	16	0.95297	6.56889	15	0.96853	3.11379e-104	0.430879
ebi-a-GCST90001425	23	0.178	0.7672	0.52856-1.1136	0.198	0.79431	0.55959-1.12747	0.053	0.74435	0.55208-1.00359	0.995	1.00185	0.57971-1.73139	0.271	0.8225	0.58585-1.15475	-0.01877	0.78412	0.138	30.5209	22	0.10634	30.4094	21	0.08406	1.7966e-116	0.183388
ebi-a-GCST90001837	16	0.863	0.93462	0.43929-1.9885	0.078	1.42638	0.96118-2.11674	0.056	1.33847	0.99250-1.80504	0.189	1.60623	0.81816-3.15340	0.237	1.52216	0.77978-2.97134	0.10549	0.32713	0.933	8.47688	15	0.90325	7.4458	14	0.91616	8.56576e-92	0.503165
ebi-a-GCST90002052	7	0.486	0.8394	0.53195-1.3245	0.059	0.71269	0.50140-1.01303	0.056	0.75672	0.56843-1.00739	0.188	0.66154	0.38374-1.14043	0.156	0.728	0.49620-1.06807	-0.0619	0.59201	0.758	3.85956	6	0.69568	3.53225	5	0.61851	2.0893e-85	0.239677
ebi-a-GCST90001434	13	0.331	0.59788	0.22190-1.6109	0.009	0.39927	0.20018-0.79638	0.059	0.61267	0.36876-1.01790	0.129	0.36202	0.10662-1.22926	0.04	0.38049	0.16693-0.86730	0.00589	0.95541	0.319	13.6839	12	0.32134	13.6799	11	0.25122	5.51201e-75	0.252883
ebi-a-GCST90001990	18	0.058	0.34898	0.12728-0.9568	0.044	0.54946	0.30650-0.98501	0.06	0.65044	0.41572-1.01771	0.222	0.51813	0.18766-1.43058	0.117	0.45896	0.18198-1.15750	0.12969	0.19573	0.873	10.8866	17	0.8624	9.06336	16	0.91078	7.88318e-104	0.275505
ebi-a-GCST90001853	20	0.377	0.81314	0.51962-1.2725	0.58	0.90023	0.62014-1.30681	0.063	0.78036	0.60062-1.01388	0.177	0.61111	0.30695-1.21670	0.425	0.85953	0.59723-1.23704	-0.0174	0.82443	0.49	19.1706	19	0.44594	19.1168	18	0.38467	1.05722e-267	0.289073
ebi-a-GCST90001834	21	0.941	0.97779	0.54600-1.7510	0.245	1.332	0.82172-2.15915	0.063	1.35692	0.98314-1.87282	0.52	1.25181	0.63934-2.45099	0.311	1.2967	0.79421-2.11713	0.10706	0.20155	0.994	8.07813	20	0.99134	6.32791	19	0.99703	2.26667e-158	0.459175
ebi-a-GCST90001884	26	0.582	0.89375	0.60228-1.3263	0.169	0.78154	0.55008-1.11037	0.065	0.80213	0.63448-1.01409	0.541	0.82538	0.45002-1.51383	0.27	0.77967	0.50599-1.20138	-0.05444	0.51075	0.697	20.7687	25	0.70544	20.323	24	0.67827	0	0.307708
ebi-a-GCST90001761	25	0.939	0.9634	0.37349-2.4851	0.308	0.74607	0.42484-1.31019	0.068	0.67317	0.44001-1.02988	0.12	0.37111	0.11104-1.24029	0.142	0.47456	0.18140-1.24151	-0.0915	0.41448	0.087	33.9205	24	0.08609	32.9316	23	0.08227	2.23972e-176	0.365524
ebi-a-GCST90002034	19	0.109	1.17546	0.97455-1.4178	0.075	1.19101	0.98241-1.44391	0.068	1.15715	0.98910-1.35376	0.465	0.86757	0.59749-1.25974	0.078	1.18901	0.99155-1.42579	-0.02303	0.75251	0.312	22.3392	18	0.21727	22.205	17	0.17696	1.24098e-99	0.101968
ebi-a-GCST90001861	22	0.868	0.95015	0.52409-1.7226	0.952	1.01409	0.64038-1.60590	0.069	1.34283	0.97777-1.84421	0.644	1.25266	0.48861-3.21143	0.775	0.9274	0.55650-1.54549	0.11354	0.19302	0.459	19.4653	21	0.55532	17.6506	20	0.61041	1.57752e-213	0.517696
ebi-a-GCST90001442	22	0.283	0.85145	0.64003-1.1327	0.564	0.9091	0.65760-1.25680	0.075	0.80443	0.63304-1.02222	0.559	0.83855	0.46886-1.49974	0.467	0.89965	0.67993-1.19038	-0.0402	0.46934	0.436	22.2861	21	0.38319	21.6959	20	0.35724	6.88922e-128	0.133329
ebi-a-GCST90002024	14	0.961	1.03452	0.27630-3.8735	0.25	0.70406	0.38706-1.28067	0.076	0.6759	0.43871-1.04131	0.475	0.71935	0.29917-1.72969	0.472	0.71935	0.30073-1.72073	-0.09051	0.5163	0.78	9.41459	13	0.74096	8.96732	12	0.70572	1.03589e-88	0.253091
ebi-a-GCST90001683	11	0.879	0.89411	0.21923-3.6466	0.21	1.7888	0.72032-4.44221	0.077	1.85258	0.93584-3.66732	0.464	1.77481	0.40537-7.77043	0.714	1.28448	0.34910-4.72608	0.1438	0.27509	0.867	5.28661	10	0.87123	3.93619	9	0.91556	3.86528e-54	0.705533
ebi-a-GCST90001854	22	0.077	0.66318	0.43086-1.0207	0.553	0.89571	0.62239-1.28906	0.078	0.79599	0.61778-1.02560	0.32	0.71119	0.36919-1.37002	0.553	0.89244	0.61654-1.29181	0.07268	0.31741	0.834	14.7111	21	0.83716	13.6596	20	0.84732	3.46194e-273	0.258961
ebi-a-GCST90001415	17	0.346	1.22483	0.81398-1.8430	0.993	0.99793	0.63960-1.55700	0.078	1.30909	0.97010-1.76654	0.309	1.58385	0.67162-3.73514	0.853	1.04	0.69074-1.56588	0.03499	0.64548	0.461	14.8107	16	0.53855	14.5902	15	0.48131	1.25232e-84	0.19374
ebi-a-GCST90002025	20	0.076	0.74562	0.54909-1.0125	0.092	0.75214	0.53983-1.04794	0.078	0.81037	0.64123-1.02413	0.527	0.80653	0.41966-1.55003	0.09	0.76121	0.56413-1.02715	0.04549	0.413	0.327	22.9909	19	0.23774	22.1276	18	0.22637	3.3847e-129	0.146668
ebi-a-GCST90001550	21	0.792	1.10832	0.52153-2.3553	0.421	1.29547	0.68924-2.43492	0.082	1.4831	0.95136-2.31204	0.531	1.3329	0.55109-3.22384	0.6	1.19955	0.61372-2.34457	0.07274	0.36043	0.993	7.95349	20	0.99217	7.0752	19	0.9938	6.44999e-104	0.486121
ebi-a-GCST90001731	22	0.337	1.43245	0.70041-2.9296	0.87	1.04821	0.59754-1.83878	0.088	1.40009	0.95128-2.06064	0.651	0.78304	0.27546-2.22589	0.667	0.84965	0.40906-1.76476	-0.00547	0.94083	0.456	21.2268	21	0.44517	21.2208	20	0.38424	1.20574e-106	0.350981
ebi-a-GCST90001691	24	0.048	1.20582	1.01232-1.4363	0.182	1.15351	0.93549-1.42235	0.091	1.14351	0.97901-1.33564	0.978	1.00524	0.69860-1.44647	0.097	1.16853	0.97948-1.39407	-0.0603	0.20967	0.822	17.9992	23	0.75753	16.3292	22	0.79922	1.01628e-148	0.103311
ebi-a-GCST90002087	29	0.372	1.26549	0.76124-2.1038	0.368	1.23507	0.77996-1.95575	0.095	1.30528	0.95501-1.78403	0.445	0.73797	0.34196-1.59262	0.703	1.11446	0.64161-1.93580	0.00972	0.88079	0.897	18.5063	28	0.91267	18.4834	27	0.88805	2.64369e-206	0.42515
ebi-a-GCST90001842	27	0.905	0.97966	0.70085-1.3694	0.62	1.08123	0.79427-1.47186	0.1	1.22023	0.96243-1.54709	0.236	1.52101	0.77235-2.99540	0.943	1.01091	0.75277-1.35756	0.10065	0.09121	0.216	31.1233	26	0.22371	27.7034	25	0.32169	0	0.375523
ebi-a-GCST90001863	16	0.543	0.77745	0.35236-1.7154	0.22	0.72203	0.42882-1.21570	0.101	0.7273	0.49689-1.06456	0.509	0.76982	0.36096-1.64182	0.269	0.72921	0.42503-1.25108	-0.01915	0.85326	0.908	9.48093	15	0.85106	9.44544	14	0.8015	3.50471e-125	0.245375
ebi-a-GCST90001647	24	0.373	1.17029	0.83397-1.6422	0.38	1.17223	0.82242-1.67082	0.106	1.23326	0.95663-1.58987	0.312	1.37299	0.75229-2.50581	0.246	1.22117	0.87897-1.69659	0.02711	0.6514	0.842	16.8609	23	0.81602	16.6511	22	0.78231	6.55262e-155	0.191421
ebi-a-GCST90001830	11	0.87	1.1014	0.35758-3.3924	0.285	1.51824	0.70576-3.26606	0.106	1.5961	0.90551-2.81336	0.988	1.00986	0.29265-3.48470	0.421	1.54837	0.55741-4.30109	0.10508	0.47339	0.523	9.47393	10	0.48779	8.914	9	0.44525	1.59565e-76	0.517444
ebi-a-GCST90001981	20	0.882	0.97201	0.67120-1.4076	0.566	1.0873	0.81699-1.44704	0.109	1.19302	0.96165-1.48007	0.002	2.37706	1.46742-3.85058	0.782	1.03868	0.79693-1.35376	0.12587	0.19891	0.591	17.2942	19	0.56994	15.5152	18	0.62634	0	0.224386
ebi-a-GCST90002068	23	0.611	1.15996	0.66012-2.0382	0.318	0.7976	0.51178-1.24304	0.112	0.76323	0.54701-1.06491	0.372	0.67332	0.28738-1.57753	0.41	0.74454	0.37428-1.48107	-0.15272	0.09243	0.193	28.1513	22	0.17072	24.5215	21	0.26848	4.42287e-126	0.199223
ebi-a-GCST90001421	16	0.863	1.05973	0.55387-2.0276	0.352	1.34599	0.71999-2.51628	0.114	1.41046	0.92033-2.16162	0.092	2.90247	0.91045-9.25290	0.327	1.37033	0.74474-2.52141	0.07661	0.27063	0.698	13.1347	15	0.59189	11.8193	14	0.62082	2.60089e-78	0.286831
ebi-a-GCST90001975	15	0.213	1.30856	0.87536-1.9561	0.379	1.2219	0.78184-1.90964	0.114	1.28709	0.94081-1.76082	0.588	1.21341	0.61256-2.40364	0.36	1.24527	0.79069-1.96119	-0.00836	0.89499	0.526	13.7319	14	0.46987	13.7128	13	0.39437	1.2222e-75	0.180684
ebi-a-GCST90001604	15	0.554	0.61381	0.12706-2.9654	0.17	0.62345	0.31754-1.22406	0.116	0.66401	0.39851-1.10638	0.396	0.65635	0.25556-1.68568	0.244	0.56977	0.23005-1.41111	0.0153	0.91923	0.998	3.1656	14	0.99874	3.15491	13	0.99732	8.75059e-94	0.234622
ebi-a-GCST90002060	20	0.022	0.63815	0.44943-0.9061	0.292	0.80632	0.54008-1.20381	0.116	0.79661	0.59974-1.05811	0.626	0.85871	0.46965-1.57009	0.055	0.65859	0.44096-0.98363	0.1145	0.073	0.284	22.3752	19	0.26598	18.6238	18	0.41533	2.90612e-114	0.145508
ebi-a-GCST90001824	20	0.611	0.70145	0.18300-2.6887	0.376	1.34812	0.69587-2.61174	0.117	1.4702	0.90758-2.38158	0.966	0.97704	0.33866-2.81881	0.675	1.20872	0.50452-2.89585	0.14069	0.26317	0.426	20.2373	19	0.38043	18.8408	18	0.40169	6.22335e-113	0.476468
ebi-a-GCST90001749	15	0.135	0.50604	0.21888-1.1699	0.133	0.66232	0.38710-1.13320	0.12	0.74428	0.51299-1.07985	0.564	1.32819	0.51806-3.40520	0.298	0.659	0.30923-1.40439	0.10881	0.33232	0.755	10.4827	14	0.72611	9.46866	13	0.7367	1.74995e-78	0.219468
ebi-a-GCST90001735	20	0.962	1.02164	0.43268-2.4123	0.374	1.28396	0.74025-2.22703	0.12	1.40565	0.91511-2.15915	0.87	1.08458	0.41673-2.82274	0.678	1.1977	0.51733-2.77288	0.07444	0.41177	0.976	9.20843	19	0.96985	8.50235	18	0.97018	2.74872e-107	0.357347
ebi-a-GCST90001768	20	0.156	0.7212	0.46807-1.1112	0.282	0.79507	0.52335-1.20785	0.124	0.79224	0.58871-1.06614	0.104	0.56043	0.28825-1.08960	0.16	0.75312	0.51483-1.10171	0.04472	0.55888	0.433	20.734	19	0.35168	20.3333	18	0.31437	3.63981e-116	0.136207
ebi-a-GCST90001756	14	0.358	0.8783	0.67292-1.1464	0.133	0.78588	0.57385-1.07624	0.126	0.83679	0.66585-1.05162	0.464	0.81938	0.48812-1.37544	0.128	0.79629	0.60507-1.04795	-0.04594	0.50129	0.832	8.94021	13	0.77744	8.45947	12	0.74827	4.64867e-67	0.0808115
ebi-a-GCST90001439	13	0.167	0.22935	0.03269-1.6089	0.268	0.59105	0.23330-1.49741	0.127	0.58276	0.29132-1.16576	0.658	1.44447	0.29560-7.05852	0.484	0.6245	0.17415-2.23946	0.16334	0.33697	0.258	14.8726	12	0.24848	13.6242	11	0.25449	1.23986e-79	0.299289
ebi-a-GCST90002121	20	0.951	0.97639	0.45895-2.0772	0.22	0.69684	0.39128-1.24099	0.128	0.73704	0.49748-1.09194	0.76	0.84598	0.29316-2.44125	0.252	0.57086	0.22501-1.44828	-0.08899	0.40246	0.238	22.7511	19	0.24848	21.8583	18	0.23834	1.73781e-129	0.238956
ebi-a-GCST90001499	24	0.059	0.77469	0.60226-0.9965	0.064	0.76193	0.57125-1.01626	0.134	0.85661	0.69958-1.04890	0.528	0.86089	0.54421-1.36185	0.117	0.81127	0.63073-1.04350	0.06873	0.20135	0.858	15.1727	23	0.88834	13.4378	22	0.92023	1.72034e-248	0.132749
ebi-a-GCST90001633	26	0.768	0.89569	0.43463-1.8458	0.013	0.51656	0.30725-0.86848	0.135	0.7155	0.46108-1.11031	0.722	0.82634	0.29255-2.33414	0.071	0.51558	0.25872-1.02743	-0.06758	0.44862	0.041	39.2234	25	0.03498	38.2769	24	0.03247	1.00286e-181	0.297214
ebi-a-GCST90001750	18	0.18	2.15048	0.73743-6.2712	0.101	1.50621	0.92301-2.45788	0.138	1.32506	0.91388-1.92124	0.314	1.56429	0.67202-3.64125	0.212	1.66545	0.76984-3.60301	-0.11824	0.35842	0.858	10.9934	17	0.8569	10.0993	16	0.86139	2.68865e-102	0.392742
ebi-a-GCST90001740	20	0.848	0.91574	0.37791-2.2190	0.483	1.21852	0.70124-2.11735	0.139	1.38917	0.89849-2.14781	0.806	1.12335	0.44926-2.80886	0.679	1.18298	0.53966-2.59319	0.09661	0.30307	0.941	10.4683	19	0.94043	9.34426	18	0.95123	1.17021e-106	0.332344
ebi-a-GCST90001700	156	0.812	0.99925	0.99315-1.0054	0.669	0.99851	0.99169-1.00537	0.139	0.99666	0.99226-1.00109	0.755	0.99828	0.98757-1.00910	0.886	0.99949	0.99254-1.00649	-0.06136	0.23084	0.671	147.062	155	0.66303	145.615	154	0.67313	NA	0.0502039
ebi-a-GCST90001624	19	0.633	0.88447	0.53921-1.4508	0.465	0.83245	0.50886-1.36180	0.14	0.78372	0.56704-1.08321	0.333	0.69596	0.34068-1.42171	0.19	0.70463	0.42560-1.16662	-0.04265	0.53513	0.675	15.2814	18	0.64257	14.8806	17	0.60408	1.8769e-118	0.146729
ebi-a-GCST90002005	20	0.958	0.98591	0.58420-1.6638	0.196	1.32127	0.86587-2.01619	0.142	1.29376	0.91739-1.82455	0.5	1.36647	0.56084-3.32936	0.322	1.26445	0.80466-1.98696	0.10934	0.2	0.437	20.9874	19	0.3375	19.1085	18	0.38517	0	0.516338
ebi-a-GCST90001655	22	0.212	1.5007	0.80992-2.7806	0.46	1.20423	0.73533-1.97214	0.142	1.371	0.89961-2.08939	0.485	1.43508	0.52987-3.88666	0.349	1.24554	0.79489-1.95166	-0.03438	0.69287	0.088	32.562	21	0.05131	32.3026	20	0.04018	3.48677e-109	0.331575
ebi-a-GCST90001546	17	0.435	0.7477	0.36748-1.5213	0.99	0.99575	0.51863-1.91179	0.148	0.71491	0.45371-1.12649	0.748	0.84085	0.29688-2.38150	0.936	0.97117	0.48154-1.95867	-0.01146	0.87422	0.806	11.2519	16	0.79368	11.226	15	0.73642	3.8043e-91	0.188209
ebi-a-GCST90001680	17	0.168	0.60624	0.30779-1.1941	0.121	0.63112	0.35275-1.12915	0.149	0.7397	0.49121-1.11389	0.424	0.70433	0.30480-1.62758	0.233	0.68712	0.37953-1.24397	0.06095	0.48152	0.615	14.6026	16	0.55391	14.0816	15	0.51935	7.97824e-91	0.173499
ebi-a-GCST90002041	13	0.379	0.62631	0.23004-1.7052	0.357	0.75513	0.41535-1.37285	0.149	0.71981	0.46062-1.12485	0.447	0.69811	0.28470-1.71183	0.392	0.71625	0.34309-1.49525	0.03983	0.76668	0.839	7.99702	12	0.78536	7.9045	11	0.72183	9.00768e-70	0.252421
ebi-a-GCST90001669	33	0.126	1.07435	0.98253-1.1747	0.255	1.06131	0.95794-1.17584	0.153	1.05926	0.97880-1.14634	0.156	1.10986	0.96440-1.27726	0.116	1.07563	0.98455-1.17513	-0.037	0.49814	0.362	33.8367	32	0.37889	33.3314	31	0.35448	2.15333e-207	0.0620115
ebi-a-GCST90001921	14	0.346	1.3012	0.76855-2.2030	0.287	1.31569	0.79379-2.18073	0.154	1.30418	0.90529-1.87885	0.979	1.01143	0.44424-2.30280	0.274	1.31642	0.82094-2.11094	0.00081	0.99075	0.769	10.1998	13	0.67752	10.1997	12	0.59845	6.89422e-73	0.191371
ebi-a-GCST90002036	24	0.142	0.71719	0.46754-1.1001	0.196	0.75087	0.48621-1.15960	0.154	0.8043	0.59605-1.08531	0.312	0.69824	0.35338-1.37965	0.34	0.79797	0.50677-1.25652	0.04645	0.46966	0.981	11.3557	23	0.97926	10.8144	22	0.9773	4.6329e-176	0.185853
ebi-a-GCST90002026	22	0.037	0.64339	0.43708-0.9471	0.145	0.74947	0.50857-1.10449	0.155	0.81488	0.61464-1.08035	0.69	0.87844	0.46880-1.64604	0.176	0.75171	0.50401-1.12115	0.09966	0.10913	0.285	25.2965	21	0.23455	22.1783	20	0.33092	3.95543e-117	0.134504
ebi-a-GCST90001536	24	0.261	1.21852	0.87075-1.7052	0.132	1.30644	0.92239-1.85038	0.155	1.2148	0.92878-1.58891	0.134	1.79062	0.85812-3.73645	0.143	1.30478	0.92515-1.84018	-0.00211	0.97561	0.057	35.6434	23	0.04484	35.6419	22	0.03316	1.84266e-142	0.168889
ebi-a-GCST90001552	28	0.108	0.82888	0.66470-1.0336	0.438	0.90008	0.68976-1.17453	0.156	0.86975	0.71714-1.05484	0.322	0.83276	0.58357-1.18835	0.221	0.86133	0.68210-1.08767	0.03968	0.3872	0.925	17.6046	27	0.91514	16.8311	26	0.9141	1.79468e-148	0.0937907
ebi-a-GCST90001827	17	0.076	4.53597	0.95855-21.4646	0.033	2.17618	1.06672-4.43956	0.156	1.45524	0.86611-2.44508	0.192	2.3541	0.68599-8.07854	0.079	2.57827	0.95748-6.94267	-0.19772	0.14911	0.821	10.754	16	0.82441	8.44115	15	0.90488	4.42477e-90	0.378733
ebi-a-GCST90001927	19	0.648	1.13601	0.66312-1.9461	0.774	1.07679	0.64928-1.78577	0.158	1.28302	0.90744-1.81405	0.576	1.27312	0.55412-2.92508	0.8	1.06475	0.65923-1.71970	0.03628	0.57031	0.693	14.5977	18	0.68938	14.2627	17	0.64843	4.57677e-99	0.22087
ebi-a-GCST90001905	15	0.018	1.76625	1.17060-2.6650	0.123	1.37574	0.91700-2.06395	0.159	1.25979	0.91379-1.73681	0.355	1.26996	0.77821-2.07244	0.116	1.37677	0.94768-2.00015	-0.18476	0.0393	0.368	16.8553	14	0.26397	11.606	13	0.56018	1.51005e-73	0.16101
ebi-a-GCST90001485	29	0.268	0.89674	0.74228-1.0833	0.694	0.96117	0.78928-1.17051	0.159	0.89944	0.77616-1.04230	0.988	1.00265	0.71060-1.41472	0.665	0.96149	0.80639-1.14641	0.00255	0.96068	0.735	22.7612	28	0.7449	22.7587	27	0.6979	0	0.159676
ebi-a-GCST90001658	27	0.553	0.89693	0.62907-1.2788	0.587	0.89487	0.59931-1.33617	0.159	0.82324	0.62805-1.07908	0.9	1.04855	0.50312-2.18530	0.858	0.96668	0.66912-1.39655	-0.04124	0.46511	0.163	33.1788	26	0.15697	32.4642	25	0.14502	3.20496e-223	0.16718
ebi-a-GCST90001734	15	0.746	0.90291	0.49251-1.6553	0.884	0.95667	0.52882-1.73068	0.163	0.75101	0.50226-1.12295	0.717	0.83126	0.31198-2.21487	0.928	0.97339	0.54731-1.73116	-0.06878	0.44009	0.644	11.3362	14	0.65945	10.7019	13	0.63577	2.5685e-73	0.129844
ebi-a-GCST90001881	15	0.5	1.27566	0.64078-2.5396	0.594	1.12938	0.72159-1.76764	0.163	1.25726	0.91119-1.73477	0.804	1.10069	0.52399-2.31211	0.789	1.10069	0.55220-2.19400	-0.00455	0.96338	0.583	12.5501	14	0.56222	12.5479	13	0.48331	7.81677e-93	0.323787
ebi-a-GCST90001964	22	0.456	1.15791	0.79336-1.6900	0.079	1.4204	0.96023-2.10109	0.165	1.20183	0.92724-1.55772	0.2	1.54592	0.81118-2.94617	0.155	1.34153	0.90786-1.98234	0.01743	0.79353	0.742	16.1772	21	0.75961	16.1069	20	0.70997	3.35504e-130	0.161384
ebi-a-GCST90001397	26	0.09	1.55291	0.95357-2.5290	0.048	1.59281	1.00443-2.52587	0.166	1.27522	0.90386-1.79915	0.306	1.67483	0.63614-4.40950	0.085	1.60252	0.95678-2.68406	-0.07491	0.27692	0.082	34.2712	25	0.10224	32.5904	24	0.11302	6.19472e-133	0.225066
ebi-a-GCST90002077	23	0.258	1.18702	0.88886-1.5852	0.708	0.93814	0.67138-1.31091	0.168	1.16502	0.93786-1.44720	0.303	1.3206	0.78731-2.21514	0.592	1.09204	0.79487-1.50031	-0.01078	0.84802	0.432	21.4408	22	0.49366	21.4024	21	0.43461	7.97224e-223	0.163902
ebi-a-GCST90001668	25	0.041	1.22269	1.01958-1.4663	0.589	1.06116	0.85536-1.31648	0.168	1.11465	0.95518-1.30074	0.455	1.12541	0.82961-1.52668	0.155	1.1398	0.95711-1.35736	-0.09758	0.07084	0.529	23.5302	24	0.48871	19.9422	23	0.64539	2.7009e-150	0.0841463
ebi-a-GCST90001838	23	0.203	1.36945	0.85639-2.1899	0.706	0.92898	0.63345-1.36239	0.169	1.20517	0.92361-1.57256	0.131	1.90845	0.85113-4.27925	0.788	0.95019	0.65736-1.37345	-0.04464	0.52424	0.468	20.6102	22	0.54493	20.1908	21	0.50921	0	0.282828
ebi-a-GCST90001468	13	0.69	0.88974	0.50831-1.5574	0.245	0.76696	0.49050-1.19925	0.173	0.77713	0.54085-1.11664	0.856	0.91754	0.37023-2.27393	0.264	0.77738	0.51026-1.18433	-0.05588	0.54683	0.683	10.4719	12	0.57463	10.0854	11	0.52272	4.36948e-266	0.267651
ebi-a-GCST90002085	19	0.172	0.66646	0.38132-1.1648	0.555	0.85319	0.50344-1.44593	0.174	0.77349	0.53399-1.12043	0.893	1.06162	0.45135-2.49702	0.699	0.89129	0.50191-1.58275	0.05352	0.49402	0.687	15.3878	18	0.63519	14.8992	17	0.60274	3.44742e-97	0.151966
ebi-a-GCST90001446	11	0.409	1.92968	0.43634-8.5338	0.973	0.98345	0.36844-2.62507	0.176	1.68395	0.79223-3.57936	0.915	0.92212	0.21528-3.94978	0.916	0.93479	0.27507-3.17683	-0.03633	0.83958	0.667	7.91936	10	0.63671	7.87595	9	0.54669	2.13094e-55	0.501659
ebi-a-GCST90002107	5	0.233	0.41005	0.12677-1.3264	0.288	0.74174	0.42761-1.28666	0.179	0.74236	0.48067-1.14653	0.455	0.73524	0.35434-1.52560	0.463	0.75628	0.38470-1.48675	0.55929	0.36428	0.76	2.3161	4	0.67784	1.17795	3	0.7583	3.1419e-24	0.109897
ebi-a-GCST90001431	17	0.493	0.86872	0.58691-1.2858	0.553	0.88677	0.59644-1.31842	0.18	0.80591	0.58790-1.10476	0.308	0.61581	0.24974-1.51846	0.476	0.87668	0.61591-1.24786	-0.05022	0.52309	0.434	17.6656	16	0.34384	17.176	15	0.30845	4.69074e-88	0.107583
ebi-a-GCST90001784	22	0.078	0.76489	0.57672-1.0145	0.127	0.76341	0.53998-1.07930	0.18	0.85425	0.67855-1.07545	0.374	0.76332	0.42621-1.36704	0.099	0.77038	0.57264-1.03639	0.08309	0.2001	0.906	12.614	21	0.92154	10.8583	20	0.94981	3.28383e-164	0.106738
ebi-a-GCST90001493	26	0.063	1.28537	0.99847-1.6547	0.209	1.18822	0.90786-1.55516	0.183	1.14694	0.93751-1.40317	0.621	1.13003	0.70058-1.82271	0.084	1.23763	0.98124-1.56101	-0.07636	0.15507	0.812	17.8253	25	0.84972	15.67	24	0.89962	5.41179e-262	0.140959
ebi-a-GCST90001875	17	0.366	1.18407	0.83033-1.6885	0.517	1.11167	0.80702-1.53131	0.185	1.16589	0.92938-1.46258	0.51	0.84387	0.51475-1.38343	0.548	1.11695	0.78436-1.59055	-0.00844	0.91303	0.763	12.1566	16	0.73313	12.1442	15	0.66808	2.50609e-112	0.181334
ebi-a-GCST90001642	28	0.667	0.8881	0.52033-1.5158	0.324	0.7781	0.47268-1.28087	0.186	0.80005	0.57496-1.11325	0.131	0.45824	0.17164-1.22335	0.633	0.87577	0.51090-1.50123	-0.02629	0.62733	0.443	27.8513	27	0.41867	27.5951	26	0.37866	1.53457e-152	0.152698
ebi-a-GCST90002064	9	0.397	0.70771	0.33380-1.5005	0.404	0.75779	0.39525-1.45286	0.186	0.71455	0.43434-1.17553	0.63	0.80423	0.34258-1.88803	0.437	0.73662	0.35430-1.53150	0.00312	0.97426	0.958	2.95281	8	0.93728	2.95169	7	0.88944	1.6045e-47	0.134113
ebi-a-GCST90001810	18	0.769	0.90748	0.48043-1.7141	0.884	1.03561	0.64615-1.65982	0.187	1.25685	0.89519-1.76462	0.831	0.91182	0.39624-2.09826	0.793	0.9207	0.50079-1.69271	0.11238	0.25265	0.65	14.2523	17	0.64917	12.844	16	0.68413	1.92844e-102	0.266812
ebi-a-GCST90001742	23	0.088	1.46031	0.96420-2.2117	0.215	1.36655	0.83378-2.23976	0.187	1.22491	0.90641-1.65534	0.546	0.77256	0.33886-1.76132	0.239	1.31286	0.84505-2.03966	-0.07545	0.24127	0.57	20.8066	22	0.53271	19.3525	21	0.56254	1.57207e-129	0.162078
ebi-a-GCST90002119	19	0.013	2.00834	1.22644-3.2887	0.06	1.46182	0.98435-2.17090	0.187	1.21713	0.90880-1.63007	0.285	1.47643	0.73877-2.95066	0.057	1.53354	1.01623-2.31419	-0.17889	0.02808	0.351	20.188	18	0.32233	14.4238	17	0.63691	6.76111e-231	0.258113
ebi-a-GCST90001586	22	0.405	1.13068	0.85185-1.5008	0.137	1.27219	0.92623-1.74736	0.191	1.16786	0.92560-1.47352	0.449	1.22593	0.73094-2.05615	0.135	1.26635	0.94020-1.70565	0.02515	0.68605	0.471	21.4524	21	0.43163	21.2734	20	0.3812	9.47217e-178	0.132305
ebi-a-GCST90002110	18	0.131	1.23069	0.95340-1.5886	0.27	1.16035	0.89102-1.51109	0.195	1.13215	0.93848-1.36577	0.62	1.10102	0.75829-1.59865	0.218	1.19734	0.90841-1.57817	-0.05904	0.35882	0.829	10.5926	17	0.87694	9.70002	16	0.88182	1.12317e-135	0.127359
ebi-a-GCST90002037	18	0.406	0.84639	0.57713-1.2413	0.196	0.77448	0.52561-1.14120	0.195	0.83526	0.63609-1.09681	0.078	0.52254	0.26504-1.03020	0.289	0.80177	0.53960-1.19131	-0.0057	0.92438	0.553	15.9699	17	0.52597	15.9606	16	0.45571	2.07911e-112	0.114285
ebi-a-GCST90001778	21	0.557	0.91006	0.66825-1.2394	0.755	0.94629	0.66907-1.33835	0.196	0.85543	0.67527-1.08366	0.671	0.88289	0.50115-1.55541	0.691	0.93936	0.69289-1.27352	-0.03766	0.54857	0.943	10.5235	20	0.95766	10.1504	19	0.94914	3.67148e-156	0.103254
ebi-a-GCST90001422	20	0.063	2.17423	1.00974-4.6817	0.099	1.64667	0.91114-2.97595	0.202	1.36565	0.84571-2.20524	0.187	2.03648	0.73523-5.64075	0.192	1.77465	0.77315-4.07345	-0.12505	0.15269	0.183	24.8382	19	0.16594	22.1004	18	0.22756	2.34145e-100	0.288924
ebi-a-GCST90002000	19	0.951	1.00887	0.76500-1.3305	0.575	0.91985	0.68706-1.23150	0.203	0.84675	0.65538-1.09401	0.745	0.89782	0.47306-1.70396	0.487	0.91176	0.70631-1.17696	-0.13469	0.03319	0.368	21.6292	18	0.24886	16.2572	17	0.50568	6.09402e-97	0.0893286
ebi-a-GCST90001634	18	0.368	0.72741	0.37079-1.4270	0.403	0.7944	0.46329-1.36214	0.205	0.77395	0.52085-1.15004	0.832	0.89584	0.32836-2.44406	0.089	0.45874	0.19674-1.06966	0.01919	0.82639	0.891	9.81012	17	0.91138	9.7604	16	0.87884	5.7032e-145	0.174145
ebi-a-GCST90002008	19	0.16	0.77276	0.54787-1.0900	0.487	0.87845	0.60963-1.26582	0.208	0.83864	0.63767-1.10295	0.428	0.77592	0.42012-1.43303	0.206	0.80191	0.57657-1.11531	0.06004	0.44267	0.434	19.7981	18	0.3443	19.1038	17	0.32261	9.07515e-109	0.0985697
ebi-a-GCST90001763	19	0.274	1.30758	0.82154-2.0812	0.075	1.45941	0.96312-2.21144	0.212	1.23996	0.88482-1.73763	0.537	1.25537	0.61823-2.54913	0.086	1.44885	0.97157-2.16061	-0.02496	0.74134	0.148	25.1138	18	0.12181	24.9486	17	0.09587	2.14444e-114	0.164508
ebi-a-GCST90001412	21	0.686	1.1555	0.58018-2.3013	0.944	0.97811	0.53027-1.80416	0.213	1.29866	0.86089-1.95904	0.705	1.19633	0.47901-2.98785	0.989	1.0045	0.54679-1.84536	0.0304	0.68047	0.485	19.8572	20	0.4669	19.676	19	0.4143	1.69624e-117	0.232996
ebi-a-GCST90001512	24	0.396	1.1603	0.82876-1.6245	0.505	1.12159	0.80054-1.57140	0.213	1.17167	0.91309-1.50348	0.496	1.21021	0.70450-2.07895	0.566	1.11603	0.77116-1.61514	0.00596	0.93147	0.377	24.6669	23	0.36768	24.6584	22	0.31369	1.91937e-148	0.127136
ebi-a-GCST90001898	20	0.112	1.51866	0.93095-2.4774	0.316	1.24925	0.80853-1.93020	0.216	1.24043	0.88165-1.74521	0.053	2.22688	1.04007-4.76791	0.121	1.41649	0.93056-2.15617	-0.08091	0.27575	0.195	24.2342	19	0.18732	22.6446	18	0.20462	1.00865e-109	0.185362
ebi-a-GCST90001545	9	0.63	0.74784	0.24130-2.3177	0.274	0.63746	0.28447-1.42850	0.216	0.67152	0.35714-1.26266	0.629	1.44833	0.34081-6.15488	0.183	0.47617	0.17562-1.29103	-0.03565	0.82323	0.208	11.3512	8	0.18258	11.2647	7	0.12748	5.09018e-49	0.151844
ebi-a-GCST90001465	20	0.124	0.77975	0.57649-1.0547	0.226	0.82512	0.60442-1.12641	0.216	0.86243	0.68201-1.09056	0.385	0.79518	0.47968-1.31818	0.127	0.77565	0.56763-1.05991	0.07971	0.31253	0.742	14.7963	19	0.73545	13.7166	18	0.74737	0	0.140908
ebi-a-GCST90001554	21	0.639	1.0848	0.77617-1.5161	0.881	1.02728	0.72187-1.46189	0.219	1.18134	0.90593-1.54048	0.438	1.35688	0.63745-2.88829	0.61	1.09244	0.78199-1.52613	0.04526	0.41666	0.338	22.5089	20	0.31355	21.7207	19	0.29837	1.07654e-114	0.118922
ebi-a-GCST90001693	23	0.123	1.20278	0.96042-1.5063	0.288	1.14145	0.89435-1.45682	0.219	1.12877	0.93044-1.36937	0.79	1.0623	0.68403-1.64975	0.144	1.17515	0.95355-1.44826	-0.05778	0.29693	0.292	26.5738	22	0.22786	25.2009	21	0.23857	2.36222e-143	0.0918818
ebi-a-GCST90001561	25	0.607	0.95076	0.78640-1.1495	0.767	0.96794	0.78010-1.20102	0.22	0.9031	0.76744-1.06273	0.453	0.87311	0.61603-1.23748	0.425	0.93004	0.78072-1.10793	-0.06496	0.31251	0.897	15.4187	24	0.90791	14.3524	23	0.91634	1.14949e-160	0.0756989
ebi-a-GCST90002003	17	0.748	1.10525	0.60740-2.0111	0.697	1.13498	0.60071-2.14443	0.22	1.29655	0.85634-1.96306	0.17	2.09796	0.76345-5.76514	0.808	1.079	0.58948-1.97501	0.05936	0.47967	0.587	14.8479	16	0.5358	14.3224	15	0.50123	3.73035e-93	0.195504
ebi-a-GCST90001774	17	0.172	0.65305	0.36475-1.1692	0.256	0.72366	0.41423-1.26423	0.221	0.79271	0.54655-1.14975	0.225	0.54373	0.21097-1.40133	0.271	0.69829	0.37682-1.29404	0.08669	0.41012	0.624	13.5366	16	0.63319	12.8186	15	0.61631	4.51775e-93	0.119139
ebi-a-GCST90001455	9	0.759	0.79836	0.20075-3.1749	0.346	1.44964	0.66979-3.13750	0.225	1.45856	0.79316-2.68217	0.546	1.43541	0.46650-4.41677	0.539	1.3837	0.51318-3.73087	0.13143	0.3721	0.878	3.82307	8	0.87272	2.91394	7	0.89285	9.55658e-45	0.251195
ebi-a-GCST90002084	19	0.096	0.77684	0.58667-1.0286	0.18	0.8072	0.59008-1.10421	0.225	0.86671	0.68780-1.09216	0.31	0.7565	0.44814-1.27704	0.139	0.80449	0.61068-1.05982	0.06836	0.19563	0.904	11.3728	18	0.87787	9.55812	17	0.92111	4.3863e-103	0.0856907
ebi-a-GCST90002014	14	0.497	0.77693	0.38311-1.5756	0.581	1.17324	0.66549-2.06839	0.227	1.2848	0.85573-1.92900	0.761	1.14182	0.49372-2.64069	0.732	1.1204	0.59289-2.11726	0.16301	0.1141	0.983	4.69106	13	0.98138	1.78711	12	0.99967	1.34603e-89	0.208297
ebi-a-GCST90001463	20	0.809	0.93789	0.56187-1.5656	0.362	0.81458	0.52413-1.26599	0.229	0.79933	0.55490-1.15142	0.91	0.95339	0.42234-2.15218	0.504	0.85264	0.53875-1.34942	-0.07654	0.39208	0.054	30.2434	19	0.04878	29.0043	18	0.04833	5.44728e-272	0.229677
ebi-a-GCST90001515	21	0.362	1.29034	0.75540-2.2041	0.245	1.26421	0.85181-1.87627	0.231	1.20398	0.88867-1.63116	0.812	1.08266	0.56734-2.06605	0.355	1.25045	0.78748-1.98559	-0.0261	0.75888	0.194	26.0364	20	0.16461	25.9042	19	0.13288	1.8389e-161	0.246985
ebi-a-GCST90002035	23	0.917	0.9712	0.56336-1.6743	0.111	0.66815	0.40669-1.09771	0.234	0.81127	0.57505-1.14451	0.583	0.78861	0.34240-1.81627	0.338	0.73587	0.39833-1.35946	-0.05808	0.41074	0.304	24.9591	22	0.29903	24.149	21	0.2859	1.01127e-182	0.181066
ebi-a-GCST90001968	18	0.564	0.75701	0.29962-1.9126	0.292	0.7301	0.40653-1.31121	0.235	0.75136	0.46895-1.20382	0.978	0.98578	0.36848-2.63725	0.707	0.84187	0.34799-2.03668	-0.00204	0.98539	0.276	20.4928	17	0.2498	20.4923	16	0.19886	1.01217e-85	0.158509
ebi-a-GCST90001525	23	0.198	1.38971	0.85528-2.2581	0.37	1.20319	0.80306-1.80269	0.235	1.19128	0.89245-1.59018	0.954	0.97767	0.45838-2.08522	0.483	1.22461	0.70180-2.13689	-0.05812	0.44533	0.275	25.9951	22	0.25189	25.2671	21	0.23578	2.00993e-146	0.209806
ebi-a-GCST90001636	7	0.278	0.05666	0.00055-5.7857	0.174	0.44544	0.13881-1.42941	0.235	0.52087	0.17748-1.52868	0.293	0.35409	0.06061-2.06854	0.191	0.34178	0.08208-1.42309	0.33596	0.37806	0.161	10.0641	6	0.12198	8.47904	5	0.13174	2.15373e-33	0.189554
ebi-a-GCST90001667	28	0.526	1.07748	0.85806-1.3530	0.68	1.05095	0.83017-1.33044	0.235	1.1265	0.92531-1.37144	0.53	1.13222	0.77206-1.66039	0.325	1.0962	0.91605-1.31177	0.04793	0.44372	0.063	40.891	27	0.04219	39.9612	26	0.03935	3.4831e-173	0.0976436
ebi-a-GCST90001959	13	0.204	0.50559	0.18782-1.3610	0.653	0.8598	0.44500-1.66123	0.236	0.7425	0.45399-1.21436	0.951	1.03398	0.36024-2.96778	0.863	1.08965	0.42004-2.82676	0.09268	0.39953	0.609	10.2369	12	0.59518	9.46877	11	0.57871	1.57769e-71	0.14855
ebi-a-GCST90002108	22	0.884	1.02215	0.76475-1.3662	0.281	1.14464	0.89534-1.46336	0.237	1.1151	0.93102-1.33558	0.804	1.05001	0.71751-1.53659	0.778	1.0397	0.79595-1.35809	0.06507	0.4585	0.418	22.3945	21	0.37709	21.7724	20	0.35299	1.61727e-243	0.142421
ebi-a-GCST90001475	17	0.899	1.03789	0.59114-1.8223	0.604	1.13174	0.70910-1.80631	0.237	1.22824	0.87369-1.72667	0.599	1.22	0.58986-2.52333	0.683	1.1078	0.68341-1.79574	0.06069	0.47281	0.84	11.1088	16	0.80272	10.5664	15	0.78268	2.24386e-112	0.15196
ebi-a-GCST90001993	13	0.489	1.30195	0.63234-2.6806	0.69	0.86712	0.43026-1.74752	0.237	0.72819	0.43030-1.23231	0.272	0.46279	0.12485-1.71552	0.795	0.91336	0.46788-1.78300	-0.20235	0.05375	0.352	13.6422	12	0.32413	8.97886	11	0.62384	1.30919e-62	0.132743
ebi-a-GCST90001692	22	0.133	1.18138	0.95922-1.4550	0.264	1.11922	0.91838-1.36398	0.238	1.11721	0.92929-1.34314	0.096	1.3777	0.96086-1.97537	0.098	1.16817	0.97950-1.39317	-0.07302	0.28264	0.057	35.4554	21	0.02515	33.4183	20	0.03034	5.77566e-138	0.0833184
ebi-a-GCST90001469	20	0.082	1.39223	0.97847-1.9809	0.661	1.09206	0.73649-1.61928	0.238	1.17217	0.90014-1.52641	0.889	1.05333	0.51208-2.16664	0.388	1.21871	0.78611-1.88937	-0.10315	0.17846	0.177	23.4714	19	0.21722	21.1661	18	0.27112	0	0.202788
ebi-a-GCST90001945	16	0.144	0.83347	0.66162-1.0500	0.229	0.84734	0.64683-1.10999	0.239	0.89177	0.73684-1.07927	0.239	0.78627	0.53528-1.15494	0.157	0.81609	0.62462-1.06626	0.06547	0.3254	0.77	11.6961	15	0.70187	10.6573	14	0.71272	4.87534e-103	0.0751344
ebi-a-GCST90001944	16	0.145	0.83363	0.66173-1.0502	0.231	0.84788	0.64724-1.11073	0.24	0.89195	0.73702-1.07945	0.244	0.78931	0.53863-1.15665	0.167	0.81929	0.62587-1.07247	0.06545	0.32565	0.77	11.7006	15	0.70153	10.663	14	0.71228	2.00448e-103	0.0751328
ebi-a-GCST90001417	22	0.442	0.77056	0.40154-1.4787	0.097	0.63791	0.37503-1.08503	0.242	0.78222	0.51830-1.18055	0.128	0.49425	0.20691-1.18062	0.212	0.6621	0.35316-1.24129	0.00549	0.95335	0.227	26.5332	21	0.18684	26.5285	20	0.14906	1.55087e-115	0.144769
ebi-a-GCST90001688	71	0.029	0.94168	0.89315-0.9928	0.275	0.96648	0.90912-1.02745	0.244	0.97425	0.93243-1.01795	0.273	0.94339	0.85072-1.04616	0.368	0.96416	0.89091-1.04344	0.11361	0.02731	0.629	65.5088	70	0.6298	60.4238	69	0.75969	0	0.0551224
ebi-a-GCST90001893	16	0.322	0.70085	0.35577-1.3806	0.108	0.65304	0.38814-1.09872	0.246	0.79354	0.53670-1.17328	0.573	0.80101	0.37637-1.70472	0.211	0.68945	0.39467-1.20439	0.03853	0.66696	0.993	4.59542	15	0.99503	4.4022	14	0.99252	3.65206e-127	0.161421
ebi-a-GCST90001555	21	0.493	1.09474	0.84940-1.4110	0.538	1.09643	0.81793-1.46978	0.25	1.13466	0.91505-1.40698	0.485	1.18363	0.74391-1.88328	0.422	1.11325	0.86131-1.43887	0.03076	0.60797	0.668	16.964	20	0.65531	16.6919	19	0.61073	6.95057e-132	0.0920878
ebi-a-GCST90001613	19	0.78	1.05343	0.73586-1.5080	0.886	0.97175	0.65664-1.43808	0.25	0.83618	0.61649-1.13418	0.708	1.18058	0.50269-2.77259	0.925	1.01674	0.72147-1.43286	-0.12041	0.05796	0.265	22.7267	18	0.20131	18.2816	17	0.37129	2.16819e-109	0.0999806
ebi-a-GCST90001457	15	0.661	0.93434	0.69425-1.2574	0.815	0.96124	0.69083-1.33749	0.253	0.86458	0.67380-1.10938	0.374	0.68001	0.29850-1.54913	0.797	0.9613	0.71518-1.29211	-0.06007	0.36328	0.707	8.79289	14	0.84408	7.90518	13	0.84972	1.01919e-78	0.0791544
ebi-a-GCST90001416	18	0.524	0.91878	0.71222-1.1852	0.4	0.87418	0.63927-1.19541	0.253	0.88531	0.71851-1.09083	0.468	0.80767	0.45944-1.41986	0.58	0.92861	0.71795-1.20109	-0.03274	0.61908	0.504	16.5136	17	0.48776	16.2525	16	0.43548	1.56326e-88	0.0698298
ebi-a-GCST90001931	8	0.434	1.77321	0.46402-6.7762	0.989	0.99433	0.44383-2.22767	0.255	0.67522	0.34323-1.32831	0.917	1.07662	0.28366-4.08619	0.719	1.17686	0.50264-2.75547	-0.24002	0.16351	0.168	11.0761	7	0.13534	7.80006	6	0.25312	3.62862e-39	0.141707
ebi-a-GCST90001775	25	0.155	0.81944	0.62828-1.0688	0.522	0.90093	0.65440-1.24035	0.257	0.88165	0.70913-1.09615	0.312	0.75895	0.44954-1.28132	0.358	0.87135	0.65311-1.16251	0.05358	0.35554	0.982	12.3424	24	0.97577	11.4533	23	0.97807	2.21405e-168	0.0878848
ebi-a-GCST90001467	23	0.76	0.89162	0.43129-1.8433	0.909	0.96892	0.56549-1.66016	0.259	0.79406	0.53222-1.18472	0.973	1.01299	0.48599-2.11144	0.938	1.027	0.53115-1.98578	-0.02791	0.71163	0.939	12.6142	22	0.94337	12.4738	21	0.92594	4.75953e-141	0.156924
ebi-a-GCST90001803	12	0.541	0.34384	0.01261-9.3738	0.079	0.45822	0.19158-1.09594	0.259	0.66374	0.32584-1.35203	0.233	0.3645	0.07600-1.74829	0.271	0.43745	0.10801-1.77169	0.10157	0.69745	0.267	13.5615	11	0.25821	13.3478	10	0.20487	1.14628e-64	0.181788
ebi-a-GCST90001785	25	0.552	0.85147	0.50536-1.4346	0.318	0.79412	0.50532-1.24798	0.261	0.81114	0.56317-1.16829	0.355	0.642	0.25540-1.61377	0.268	0.77705	0.50248-1.20166	-0.01605	0.79706	0.198	31.5928	24	0.13742	31.5001	23	0.111	3.51786e-147	0.138694
ebi-a-GCST90002100	19	0.642	0.85574	0.44870-1.6320	0.706	1.10421	0.65928-1.84942	0.261	1.23512	0.85447-1.78534	0.314	1.58087	0.66496-3.75836	0.695	1.15093	0.57627-2.29865	0.12285	0.19264	0.667	15.2473	18	0.64492	13.4069	17	0.70855	1.26574e-108	0.177637
ebi-a-GCST90001482	32	0.534	0.93145	0.74659-1.1621	0.547	0.92788	0.72719-1.18395	0.262	0.9046	0.75921-1.07784	0.497	0.86848	0.58105-1.29810	0.24	0.88537	0.72555-1.08038	-0.02532	0.67427	0.817	24.1422	31	0.8047	23.962	30	0.77374	3.96985e-270	0.0886213
ebi-a-GCST90001857	21	0.577	0.89537	0.61110-1.3119	0.567	0.90712	0.64969-1.26654	0.263	0.87108	0.68408-1.10918	0.102	0.56314	0.29199-1.08607	0.707	0.93079	0.64410-1.34508	-0.01249	0.85653	0.529	19.3522	20	0.49905	19.3181	19	0.43661	6.05552e-283	0.134004
ebi-a-GCST90001937	16	0.187	0.74645	0.49388-1.1282	0.224	0.75329	0.47696-1.18972	0.263	0.82942	0.59777-1.15083	0.507	0.69103	0.23830-2.00384	0.147	0.73826	0.50016-1.08971	0.04916	0.42545	0.754	10.8498	15	0.76317	10.1759	14	0.74921	6.37764e-85	0.0949245
ebi-a-GCST90001677	20	0.219	1.76239	0.73650-4.2173	0.403	1.33193	0.67997-2.60899	0.263	1.32192	0.81075-2.15538	0.306	1.96418	0.55815-6.91209	0.675	1.27697	0.41487-3.93051	-0.06335	0.44341	0.313	21.9445	19	0.28703	21.2204	18	0.26844	4.41863e-102	0.263489
ebi-a-GCST90002038	19	0.529	0.88938	0.62191-1.2719	0.342	0.83549	0.57662-1.21058	0.264	0.86244	0.66519-1.11818	0.282	0.71879	0.40122-1.28770	0.408	0.85256	0.58931-1.23340	-0.01417	0.80938	0.595	16.5958	18	0.55104	16.5358	17	0.48622	3.68658e-117	0.0961737
ebi-a-GCST90002075	9	0.151	0.26617	0.05329-1.3294	0.909	0.94793	0.37862-2.37325	0.266	0.65492	0.31079-1.38011	0.967	1.03541	0.20837-5.14502	0.744	1.26209	0.32787-4.85823	0.21364	0.25903	0.241	10.6341	8	0.22331	8.74857	7	0.27122	7.06417e-44	0.159415
ebi-a-GCST90002118	13	0.43	0.51173	0.10310-2.5398	0.408	0.70704	0.31125-1.60614	0.266	0.70493	0.38059-1.30567	0.618	0.71322	0.19547-2.60228	0.591	0.7415	0.25669-2.14201	0.0654	0.67743	0.206	16.3503	12	0.17571	16.0834	11	0.13806	1.79785e-77	0.198013
ebi-a-GCST90001556	12	0.048	1.46417	1.05147-2.0388	0.287	1.21768	0.84712-1.75033	0.267	1.16588	0.88915-1.52872	0.838	1.06604	0.58546-1.94110	0.148	1.30747	0.93275-1.83274	-0.16583	0.04087	0.739	7.99612	11	0.71365	2.48936	10	0.99103	1.68446e-70	0.0854218
ebi-a-GCST90001573	25	0.474	1.15336	0.78519-1.6942	0.378	1.18386	0.81337-1.72311	0.268	1.16704	0.88794-1.53386	0.211	1.58367	0.78499-3.19496	0.669	1.08168	0.75796-1.54366	0.00459	0.93264	0.821	17.678	24	0.81834	17.6707	23	0.7751	1.1465e-151	0.124194
ebi-a-GCST90001849	22	0.677	0.86394	0.43853-1.7020	0.538	0.85722	0.52530-1.39888	0.268	0.82876	0.59421-1.15588	0.659	1.23343	0.49270-3.08777	0.75	0.91841	0.54836-1.53818	-0.01133	0.89084	0.399	22.9126	21	0.34866	22.8905	20	0.29421	1.25815e-183	0.152086
ebi-a-GCST90001976	17	0.993	0.99569	0.36911-2.6859	0.262	0.6608	0.32031-1.36322	0.269	0.74462	0.44132-1.25636	0.528	0.6892	0.22229-2.13689	0.344	0.67936	0.31247-1.47706	-0.07889	0.50691	0.285	19.5044	16	0.24337	18.9213	15	0.21732	1.1454e-83	0.16189
ebi-a-GCST90002083	21	0.029	0.34282	0.14070-0.8353	0.263	0.70462	0.38177-1.30050	0.271	0.7924	0.52349-1.19946	0.287	0.53057	0.17032-1.65282	0.14	0.4544	0.16599-1.24396	0.1791	0.05369	0.305	22.0834	20	0.336	17.8524	19	0.53232	1.51423e-112	0.148119
ebi-a-GCST90002010	13	0.043	1.84995	1.09081-3.1374	0.511	1.14445	0.76507-1.71197	0.274	1.17836	0.87820-1.58111	0.174	1.65161	0.83647-3.26112	0.952	1.01281	0.67259-1.52511	-0.2145	0.06908	0.541	10.0957	12	0.60756	6.03798	11	0.87082	1.25913e-170	0.139192
ebi-a-GCST90001487	25	0.897	0.97477	0.66600-1.4267	0.44	1.17299	0.78249-1.75836	0.275	1.17416	0.88008-1.56651	0.684	1.17285	0.54941-2.50370	0.491	1.17285	0.75030-1.83336	0.0837	0.16723	0.361	25.868	24	0.3599	23.7661	23	0.41685	2.4874e-138	0.1246
ebi-a-GCST90001989	24	0.411	1.14281	0.83624-1.5618	0.565	1.08884	0.81475-1.45514	0.28	1.12235	0.91017-1.38399	0.586	1.16591	0.67586-2.01126	0.683	1.05759	0.81131-1.37863	-0.01038	0.87946	0.529	22.2055	23	0.50788	22.1818	22	0.44909	0	0.137942
ebi-a-GCST90001696	39	0.055	1.00918	1.00010-1.0183	0.091	1.00875	0.99861-1.01901	0.282	1.00459	0.99625-1.01300	0.864	0.99837	0.98009-1.01700	0.088	1.00759	0.99909-1.01616	-0.11183	0.04183	0.08	51.4377	38	0.07154	45.9209	37	0.14919	2.49713e-287	0.0500928
ebi-a-GCST90001801	23	0.162	0.72652	0.47184-1.1187	0.607	0.91068	0.63761-1.30070	0.282	0.87857	0.69385-1.11246	0.879	0.95598	0.53867-1.69661	0.718	0.92423	0.60586-1.40991	0.09005	0.31445	0.849	14.797	22	0.8708	13.7349	21	0.88072	0	0.159148
ebi-a-GCST90001671	21	0.202	1.44549	0.83726-2.4956	0.253	1.31266	0.82371-2.09186	0.284	1.23018	0.84240-1.79645	0.548	1.25089	0.61060-2.56260	0.28	1.30312	0.81685-2.07888	-0.07627	0.42794	0.097	30.5082	20	0.06203	29.4897	19	0.05866	3.45962e-278	0.289484
ebi-a-GCST90001961	20	0.221	1.23457	0.89152-1.7096	0.664	1.07109	0.78596-1.45966	0.284	1.125	0.90685-1.39563	0.765	1.1004	0.59296-2.04211	0.261	1.17294	0.89566-1.53605	-0.05962	0.46489	0.706	14.8245	19	0.73369	14.2669	18	0.71153	0	0.151819
ebi-a-GCST90001595	7	0.767	1.50505	0.11686-19.3843	0.772	0.85002	0.28304-2.55281	0.285	0.6213	0.25983-1.48564	0.956	1.04605	0.22452-4.87365	0.965	1.0284	0.30664-3.44895	-0.16411	0.50041	0.404	6.08744	6	0.41347	5.50699	5	0.35718	1.0558e-33	0.135493
ebi-a-GCST90001856	24	0.903	1.03169	0.62949-1.6909	0.925	0.98168	0.66806-1.44254	0.285	1.16555	0.88018-1.54344	0.536	1.25004	0.62301-2.50815	0.853	0.96674	0.67843-1.37757	0.04495	0.56236	0.892	14.4178	23	0.91428	14.0718	22	0.89891	7.45042e-250	0.17709
ebi-a-GCST90001725	20	0.996	1.00099	0.68557-1.4615	0.91	1.02176	0.70366-1.48368	0.286	1.18634	0.86647-1.62430	0.142	2.00419	0.82379-4.87602	0.926	0.9844	0.71096-1.36301	0.10532	0.15532	0.163	26.5471	19	0.11565	23.656	18	0.16662	1.58428e-107	0.114366
ebi-a-GCST90002050	16	0.58	0.84664	0.47583-1.5064	0.666	0.90895	0.58959-1.40131	0.287	0.84504	0.61997-1.15181	0.913	1.03807	0.53722-2.00586	0.944	0.9811	0.58196-1.65397	-0.00081	0.994	0.948	8.00802	15	0.92346	8.00796	14	0.88891	3.16599e-85	0.125041
ebi-a-GCST90001565	11	0.079	0.6831	0.46819-0.9967	0.067	0.68109	0.45177-1.02682	0.287	0.84279	0.61501-1.15494	0.676	0.86117	0.43633-1.69967	0.096	0.70885	0.49113-1.02309	0.14993	0.07962	0.483	9.33369	10	0.50075	5.43079	9	0.79526	8.92368e-54	0.0744554
ebi-a-GCST90001435	17	0.14	0.78273	0.57516-1.0652	0.448	0.8717	0.61133-1.24295	0.287	0.86866	0.67017-1.12595	0.697	0.88383	0.47967-1.62851	0.275	0.83549	0.61182-1.14094	0.06843	0.25195	0.423	16.6588	16	0.408	15.2183	15	0.43581	8.82519e-86	0.0753157
ebi-a-GCST90002001	15	0.454	1.18647	0.76848-1.8318	0.566	1.14225	0.72494-1.79978	0.289	1.19521	0.85981-1.66143	0.748	1.12554	0.55489-2.28304	0.483	1.15429	0.78138-1.70517	0.0035	0.96028	0.871	9.72216	14	0.7822	9.71959	13	0.71669	2.73557e-78	0.101985
ebi-a-GCST90001811	14	0.515	1.34731	0.56369-3.2203	0.562	0.80913	0.39529-1.65624	0.29	0.76486	0.46537-1.25707	0.186	0.34886	0.07946-1.53176	0.215	0.34886	0.07170-1.69744	-0.13781	0.14733	0.444	13.0428	13	0.44451	10.6434	12	0.5597	3.05697e-86	0.133181
ebi-a-GCST90001451	19	0.35	0.64503	0.26366-1.5780	0.227	0.73064	0.43935-1.21507	0.29	0.81715	0.56195-1.18825	0.504	0.76014	0.34567-1.67155	0.303	0.70361	0.36762-1.34665	0.05738	0.57575	0.712	14.9471	18	0.6656	14.6215	17	0.62272	4.12815e-132	0.137476
ebi-a-GCST90001564	14	0.234	0.73071	0.44757-1.1930	0.21	0.71738	0.42670-1.20608	0.292	0.82149	0.56980-1.18434	0.216	0.55471	0.22818-1.34852	0.183	0.67836	0.39494-1.16517	0.05365	0.49522	0.534	12.3117	13	0.50227	11.8169	12	0.4605	5.72442e-67	0.0893702
ebi-a-GCST90001620	24	0.214	1.28527	0.87530-1.8873	0.464	1.14018	0.80259-1.61977	0.294	1.14858	0.88682-1.48762	0.409	1.2475	0.74519-2.08840	0.506	1.12387	0.80061-1.57765	-0.05456	0.44283	0.37	25.8308	23	0.30892	25.1331	22	0.29075	1.106e-204	0.123159
ebi-a-GCST90001736	21	0.924	1.04905	0.39924-2.7565	0.495	1.23612	0.67231-2.27275	0.294	1.30042	0.79621-2.12391	0.903	0.93858	0.34257-2.57156	0.575	1.23975	0.59262-2.59356	0.05378	0.61642	0.165	27.2411	20	0.12862	26.8743	19	0.10762	8.01472e-111	0.22635
ebi-a-GCST90001885	21	0.74	1.07076	0.71942-1.5937	0.486	1.15168	0.77377-1.71417	0.297	1.16537	0.87431-1.55333	0.776	1.09017	0.60661-1.95920	0.455	1.16255	0.78925-1.71240	0.03686	0.54612	0.455	21.3542	20	0.37656	20.9379	19	0.34024	1.03142e-129	0.121773
ebi-a-GCST90001969	16	0.272	1.35326	0.80560-2.2732	0.405	1.22303	0.76180-1.96349	0.298	1.19021	0.85719-1.65259	0.398	0.62641	0.21814-1.79881	0.441	1.22276	0.74332-2.01144	-0.04658	0.5366	0.516	14.8728	15	0.46062	14.4583	14	0.41616	1.14443e-102	0.123711
ebi-a-GCST90001409	18	0.112	0.7014	0.46418-1.0599	0.295	0.79151	0.51088-1.22631	0.3	0.84268	0.60970-1.16470	0.406	1.5294	0.57518-4.06668	0.219	0.75813	0.49555-1.15982	0.08534	0.19457	0.309	19.9816	17	0.27517	17.9277	16	0.32815	9.5756e-91	0.0886488
ebi-a-GCST90001720	21	0.071	1.35786	0.99230-1.8581	0.245	1.20385	0.88054-1.64587	0.301	1.13193	0.89510-1.43142	0.879	1.0506	0.55992-1.97126	0.248	1.20546	0.88593-1.64023	-0.10687	0.10262	0.828	14.0848	20	0.82617	11.1438	19	0.91891	0	0.190698
ebi-a-GCST90001496	24	0.702	0.92651	0.63001-1.3625	0.462	1.16313	0.77746-1.74012	0.301	1.15257	0.88073-1.50834	0.634	1.19665	0.57694-2.48204	0.832	1.04973	0.67327-1.63667	0.10522	0.13582	0.524	22.3841	23	0.49718	19.9869	22	0.58386	4.98726e-196	0.127191
ebi-a-GCST90001934	17	0.301	1.22513	0.84468-1.7769	0.436	1.17193	0.78616-1.74701	0.301	0.84297	0.60986-1.16519	0.934	0.96083	0.37640-2.45268	0.463	1.15481	0.79382-1.67997	-0.19426	0.00699	0.211	20.152	16	0.21345	10.4022	15	0.79371	9.49393e-90	0.0903522
ebi-a-GCST90001930	15	0.17	1.62221	0.84469-3.1154	0.038	1.81501	1.03487-3.18328	0.301	1.23966	0.82488-1.86303	0.219	2.16564	0.66701-7.03136	0.181	1.57762	0.83592-2.97743	-0.07675	0.32069	0.39	14.8074	14	0.39144	13.6853	13	0.39637	3.81171e-77	0.145953
ebi-a-GCST90002032	17	0.577	0.90235	0.63365-1.2850	0.598	0.93226	0.71834-1.20988	0.308	0.88599	0.70205-1.11813	0.215	0.6065	0.28370-1.29657	0.578	0.93054	0.72576-1.19311	-0.00857	0.8919	0.385	18.5918	16	0.2904	18.5681	15	0.23398	0	0.162929
ebi-a-GCST90001942	12	0.416	0.88184	0.65936-1.1794	0.483	0.89895	0.66754-1.21060	0.313	0.88434	0.69661-1.12267	0.834	1.06892	0.58168-1.96431	0.563	0.9227	0.70820-1.20217	0.00288	0.97079	0.557	11.9581	11	0.36681	11.9564	10	0.28799	1.87246e-63	0.0654737
ebi-a-GCST90001600	9	0.975	1.02265	0.25924-4.0342	0.992	1.00442	0.41225-2.44724	0.313	0.71845	0.37806-1.36529	0.521	1.70946	0.35730-8.17862	0.566	1.61241	0.33683-7.71871	-0.17522	0.58143	0.315	8.92242	8	0.34888	8.51611	7	0.28929	3.6426e-45	0.113361
ebi-a-GCST90001747	23	0.039	0.69988	0.50946-0.9615	0.25	0.81255	0.57031-1.15770	0.313	0.87985	0.68606-1.12839	0.527	1.23072	0.65380-2.31673	0.248	0.83207	0.61405-1.12748	0.10097	0.04904	0.358	24.8735	22	0.30316	20.5085	21	0.48929	1.12757e-150	0.0857099
ebi-a-GCST90001924	17	0.822	0.94907	0.60735-1.4831	0.634	0.90312	0.59338-1.37453	0.317	0.85923	0.63823-1.15674	0.733	1.11535	0.60179-2.06717	0.439	0.8379	0.54134-1.29694	-0.03759	0.56693	0.962	8.05712	16	0.94715	7.71434	15	0.93472	2.60713e-93	0.0883753
ebi-a-GCST90002069	18	0.404	0.81961	0.51991-1.2921	0.186	0.75637	0.50006-1.14406	0.318	0.85915	0.63790-1.15714	0.541	0.81217	0.42247-1.56134	0.154	0.71518	0.46042-1.11090	0.01931	0.79194	0.972	7.22046	17	0.98051	7.1485	16	0.97029	1.36629e-133	0.103295
ebi-a-GCST90001646	22	0.827	0.97351	0.76768-1.2345	0.315	1.14724	0.87761-1.49970	0.319	1.10066	0.91162-1.32889	0.307	1.25549	0.82017-1.92187	0.626	1.06074	0.83997-1.33954	0.10805	0.11177	0.454	20.7449	21	0.47461	17.9772	20	0.58891	4.7299e-137	0.0727765
ebi-a-GCST90001839	17	0.575	0.87817	0.56343-1.3687	0.771	0.93775	0.60881-1.44443	0.323	0.85368	0.62381-1.16824	0.388	0.73332	0.36969-1.45460	0.631	0.90874	0.61924-1.33358	-0.01205	0.86217	0.9	9.19571	16	0.90514	9.16451	15	0.86876	1.30748e-123	0.103958
ebi-a-GCST90001967	18	0.526	0.83485	0.48355-1.4414	0.478	0.80888	0.45005-1.45382	0.325	1.20832	0.82869-1.76187	0.278	1.89018	0.62098-5.75343	0.327	0.73413	0.40262-1.33860	0.14241	0.09514	0.252	18.416	17	0.36306	15.27	16	0.50496	4.63283e-89	0.128017
ebi-a-GCST90002098	29	0.294	0.8696	0.67311-1.1234	0.809	0.96663	0.73449-1.27213	0.325	0.9052	0.74219-1.10401	0.848	1.04786	0.65197-1.68415	0.514	0.92202	0.72487-1.17279	0.03044	0.63087	0.837	20.7085	28	0.83729	20.4723	27	0.81036	0	0.0983936
ebi-a-GCST90002081	23	0.426	0.6729	0.25863-1.7507	0.751	0.90658	0.49524-1.65958	0.326	0.79933	0.51115-1.24997	0.997	0.99813	0.34189-2.91394	0.908	0.94989	0.40283-2.23987	0.03425	0.69373	0.675	18.5216	22	0.67465	18.3622	21	0.62598	2.65208e-118	0.144074
ebi-a-GCST90002094	14	0.15	1.39979	0.91165-2.1493	0.399	1.14743	0.83373-1.57916	0.327	1.13026	0.88485-1.44374	0.314	1.27725	0.80817-2.01860	0.323	1.18199	0.85889-1.62662	-0.09568	0.25685	0.736	10.6327	13	0.64155	9.2153	12	0.68444	3.31225e-109	0.114832
ebi-a-GCST90001899	21	0.443	0.89819	0.68653-1.1751	0.586	0.91804	0.67509-1.24843	0.327	0.89699	0.72166-1.11491	0.419	0.83535	0.54476-1.28095	0.42	0.89652	0.69131-1.16266	-0.00103	0.98687	0.863	13.851	20	0.83797	13.8507	19	0.79232	6.69164e-132	0.0780274
ebi-a-GCST90001449	16	0.924	0.96257	0.44385-2.0875	0.328	1.33885	0.74583-2.40341	0.331	1.22578	0.81293-1.84829	0.329	1.6656	0.61886-4.48278	0.407	1.40271	0.64497-3.05067	0.066	0.48218	0.686	12.6443	15	0.62975	12.123	14	0.59642	1.06438e-80	0.135078
ebi-a-GCST90001501	20	0.33	1.13546	0.88567-1.4557	0.175	1.18378	0.92755-1.51078	0.332	1.10102	0.90660-1.33714	0.687	1.07107	0.77047-1.48897	0.379	1.12331	0.87203-1.44700	-0.03802	0.69036	0.107	26.8827	19	0.10742	26.6401	18	0.086	1.73443e-124	0.072563
ebi-a-GCST90002071	17	0.819	0.94891	0.61105-1.4736	0.83	0.952	0.60788-1.49093	0.333	0.84687	0.60485-1.18573	0.274	0.63427	0.28844-1.39473	0.786	0.94282	0.62030-1.43302	-0.05551	0.44401	0.946	8.10778	16	0.94559	7.48972	15	0.94261	7.84712e-107	0.102418
ebi-a-GCST90001590	18	0.758	1.0936	0.62512-1.9131	0.608	1.14713	0.67886-1.93841	0.337	1.19617	0.83005-1.72376	0.964	0.98113	0.43255-2.22544	0.673	1.11969	0.66779-1.87741	0.02602	0.68366	0.709	14.1316	17	0.65776	13.9594	16	0.60174	1.68384e-96	0.113961
ebi-a-GCST90001922	17	0.706	1.31666	0.32436-5.3447	0.712	0.8815	0.45142-1.72135	0.338	0.78806	0.48390-1.28340	0.744	0.82179	0.25766-2.62107	0.74	0.83177	0.28560-2.42241	-0.10134	0.45536	0.501	15.6946	16	0.47447	15.1032	15	0.44401	1.42827e-85	0.132325
ebi-a-GCST90001841	21	0.843	1.04207	0.69661-1.5589	0.062	1.40881	0.98287-2.01932	0.339	1.13878	0.87262-1.48612	0.162	1.60158	0.84787-3.02532	0.165	1.25872	0.92039-1.72142	0.04465	0.56654	0.237	24.3487	20	0.22749	23.9203	19	0.19923	4.34675e-251	0.139335
ebi-a-GCST90001427	23	0.42	0.68289	0.27496-1.6960	0.293	0.71373	0.38067-1.33822	0.339	0.78954	0.48621-1.28213	0.39	0.65349	0.25233-1.69242	0.336	0.69253	0.33325-1.43916	0.02985	0.71323	0.2	28.7916	22	0.15091	28.6025	21	0.12388	2.94094e-116	0.138976
ebi-a-GCST90001509	20	0.139	0.83055	0.65676-1.0503	0.366	0.89499	0.70354-1.13853	0.34	0.91279	0.75664-1.10116	0.481	0.87834	0.61670-1.25101	0.217	0.8663	0.69507-1.07970	0.10265	0.21833	0.328	22.541	19	0.25816	20.6725	18	0.29626	6.42009e-134	0.0677056
ebi-a-GCST90001413	17	0.558	0.92152	0.70509-1.2044	0.658	0.9382	0.70762-1.24390	0.342	0.89777	0.71886-1.12122	0.976	1.00781	0.61700-1.64615	0.645	0.94041	0.72766-1.21536	-0.02445	0.73646	0.789	12.4138	16	0.71504	12.2963	15	0.65648	4.39906e-86	0.0652335
ebi-a-GCST90001443	15	0.941	1.02208	0.57685-1.8109	0.454	1.23292	0.71231-2.13403	0.342	1.20395	0.82070-1.76618	0.782	1.11772	0.51523-2.42477	0.472	1.23938	0.70136-2.19011	0.06068	0.46321	0.766	10.788	14	0.7026	10.2167	13	0.67612	1.41354e-74	0.103822
ebi-a-GCST90002066	21	0.284	0.85168	0.64035-1.1328	0.478	0.89894	0.66979-1.20649	0.343	0.89794	0.71871-1.12186	0.817	0.94265	0.57464-1.54634	0.413	0.88499	0.66459-1.17847	0.03241	0.56765	0.958	10.4836	20	0.95853	10.1453	19	0.94927	1.03169e-124	0.0760951
ebi-a-GCST90001614	13	0.227	0.18248	0.01350-2.4667	0.057	0.40395	0.15892-1.02681	0.345	0.6621	0.28148-1.55739	0.166	0.29301	0.05724-1.49988	0.1	0.28539	0.07187-1.13329	0.24161	0.32659	0.022	24.4376	12	0.01772	22.3004	11	0.02215	7.04445e-69	0.192311
ebi-a-GCST90001986	14	0.971	1.01401	0.48370-2.1257	0.436	0.78513	0.42733-1.44252	0.348	0.80889	0.51951-1.25947	0.48	0.7334	0.31820-1.69036	0.424	0.78515	0.44224-1.39396	-0.06475	0.46957	0.77	10.2969	13	0.66949	9.73922	12	0.63883	1.72955e-77	0.0992318
ebi-a-GCST90001622	27	0.328	1.38144	0.73246-2.6054	0.229	1.36733	0.82125-2.27653	0.348	1.19493	0.82382-1.73323	0.179	0.51647	0.20209-1.31989	0.387	1.31149	0.71651-2.40052	-0.04072	0.58248	0.216	32.3515	26	0.18175	31.955	25	0.15932	1.49998e-186	0.166262
ebi-a-GCST90002067	20	0.759	0.92427	0.56274-1.5181	0.378	0.84249	0.57538-1.23360	0.349	0.85288	0.61127-1.19000	0.769	1.09312	0.60794-1.96549	0.5	0.87541	0.59928-1.27878	-0.03954	0.6677	0.147	28.4112	19	0.07583	28.1136	18	0.06035	4.96648e-118	0.102922
ebi-a-GCST90001771	25	0.09	1.37964	0.96649-1.9694	0.385	1.18558	0.80749-1.74070	0.349	1.13233	0.87284-1.46897	0.969	0.98766	0.53028-1.83957	0.507	1.12657	0.79675-1.59291	-0.09705	0.1286	0.483	24.5105	24	0.43274	22.0256	23	0.51871	7.76266e-178	0.100365
ebi-a-GCST90002115	16	0.135	1.93597	0.85629-4.3770	0.17	1.55877	0.82660-2.93947	0.352	1.23991	0.78831-1.95022	0.349	1.70082	0.57961-4.99095	0.204	1.83533	0.74972-4.49292	-0.11384	0.21891	0.682	12.362	15	0.65145	10.7052	14	0.70903	3.04578e-80	0.145329
ebi-a-GCST90001450	17	0.793	0.9302	0.54722-1.5812	0.643	1.11792	0.69782-1.79092	0.353	1.19821	0.81828-1.75454	0.758	0.89564	0.44930-1.78537	0.75	1.08003	0.67821-1.71992	0.10073	0.2082	0.225	21.419	16	0.16296	19.2045	15	0.20462	7.23621e-102	0.132309
ebi-a-GCST90001817	12	0.323	1.92374	0.56075-6.5998	0.143	1.81158	0.81833-4.01043	0.353	1.32102	0.73397-2.37762	0.303	1.95186	0.58087-6.55873	0.221	1.9791	0.70555-5.55147	-0.07146	0.51204	0.652	8.9536	11	0.62618	8.49143	10	0.58095	1.6928e-61	0.162736
ebi-a-GCST90001533	16	0.72	0.89799	0.50454-1.5983	0.619	1.11828	0.71969-1.73760	0.353	1.15135	0.85498-1.55044	0.834	1.07956	0.53497-2.17856	0.739	1.07956	0.69399-1.67936	0.08093	0.34061	0.648	13.2154	15	0.58566	12.2422	14	0.58686	1.20216e-144	0.147309
ebi-a-GCST90002040	29	0.147	0.66781	0.39283-1.1353	0.045	0.63969	0.41311-0.99054	0.355	0.85803	0.62019-1.18708	0.316	0.62185	0.24981-1.54797	0.08	0.59537	0.34010-1.04224	0.08093	0.25388	0.116	36.4912	28	0.13051	34.7423	27	0.14551	5.97344e-184	0.124215
ebi-a-GCST90001566	15	0.198	0.59567	0.28178-1.2592	0.463	0.78117	0.40383-1.51108	0.357	0.80405	0.50571-1.27842	0.799	0.88819	0.36278-2.17450	0.495	0.78881	0.40604-1.53241	0.09215	0.33532	0.928	8.01735	14	0.88842	7.01632	13	0.90131	7.88092e-74	0.102455
ebi-a-GCST90001966	19	0.79	1.08893	0.58811-2.0162	0.521	1.17653	0.71620-1.93273	0.358	1.18596	0.82455-1.70578	0.234	1.56824	0.76580-3.21150	0.566	1.17761	0.68125-2.03560	0.02754	0.7407	0.908	11.2769	18	0.88224	11.1637	17	0.84793	1.97151e-135	0.147744
ebi-a-GCST90001619	31	0.888	0.97909	0.73143-1.3106	0.975	0.99527	0.73563-1.34654	0.359	0.90294	0.72605-1.12292	0.372	0.79428	0.48261-1.30722	0.82	0.96787	0.73217-1.27944	-0.0417	0.41919	0.67	26.3013	30	0.65967	25.6298	29	0.6452	1.44024e-255	0.0869233
ebi-a-GCST90001599	14	0.638	0.71629	0.18451-2.7807	0.636	0.83075	0.38566-1.78955	0.361	0.76736	0.43482-1.35420	0.83	0.83734	0.17059-4.11011	0.976	0.97436	0.18437-5.14919	0.01297	0.9138	0.265	15.6557	13	0.26822	15.6398	12	0.2083	1.04615e-84	0.12996
ebi-a-GCST90001645	19	0.785	1.09069	0.59039-2.0150	0.793	0.92471	0.51508-1.66013	0.363	0.83581	0.56807-1.22974	0.066	0.30438	0.09261-1.00036	0.844	1.06409	0.57846-1.95740	-0.07368	0.29101	0.456	18.8432	18	0.40154	17.6127	17	0.41366	1.80673e-113	0.101957
ebi-a-GCST90001958	13	0.738	1.07379	0.71517-1.6122	0.449	1.17951	0.76899-1.80916	0.364	1.15135	0.84932-1.56079	0.756	0.90252	0.47969-1.69807	0.403	1.18018	0.81172-1.71590	0.03354	0.62198	0.715	9.82168	12	0.6316	9.56437	11	0.56994	4.09201e-80	0.0864092
ebi-a-GCST90001617	17	0.328	0.81083	0.53994-1.2176	0.198	0.78119	0.53646-1.13756	0.367	0.85973	0.61898-1.19411	0.725	0.89044	0.47152-1.68154	0.231	0.80049	0.56372-1.13670	0.03236	0.62233	0.266	20.7345	16	0.18894	20.3907	15	0.15745	2.24638e-84	0.0785221
ebi-a-GCST90001932	20	0.267	1.5472	0.73349-3.2636	0.221	1.322	0.84526-2.06761	0.37	1.17236	0.82790-1.66015	0.517	1.25468	0.63987-2.46022	0.306	1.35363	0.77003-2.37953	-0.07253	0.42104	0.77	14.6275	19	0.74596	13.9495	18	0.73238	1.70827e-123	0.125538
ebi-a-GCST90001549	28	0.934	1.03275	0.48761-2.1873	0.738	1.09735	0.63655-1.89174	0.373	1.2013	0.80261-1.79804	0.105	2.22919	0.87389-5.68641	0.898	1.04382	0.54449-2.00106	0.03741	0.64153	0.228	33.1725	27	0.19144	32.8918	26	0.16526	1.42496e-142	0.153879
ebi-a-GCST90001787	20	0.728	0.93241	0.63267-1.3741	0.301	0.80301	0.53007-1.21648	0.376	0.88031	0.66397-1.16716	0.907	0.95604	0.45398-2.01330	0.25	0.79764	0.54921-1.15845	-0.02846	0.66919	0.39	21.1123	19	0.33063	20.8933	18	0.28483	3.27003e-145	0.0841935
ebi-a-GCST90001598	19	0.557	0.64005	0.14840-2.7605	0.463	0.7703	0.38355-1.54704	0.376	0.77419	0.43918-1.36476	0.936	1.05998	0.26010-4.31979	0.917	1.07725	0.27260-4.25695	0.03371	0.78425	0.173	23.8795	18	0.15902	23.7713	17	0.12578	8.47397e-108	0.145599
ebi-a-GCST90002002	12	0.99	1.00626	0.38852-2.6062	0.637	0.82607	0.37396-1.82478	0.376	0.7733	0.43750-1.36685	0.96	1.03095	0.31853-3.33676	0.766	0.8691	0.35218-2.14473	-0.08099	0.51376	0.887	5.81538	11	0.88539	5.35706	10	0.86609	2.26612e-59	0.103398
ebi-a-GCST90001873	14	0.372	1.25607	0.77547-2.0345	0.323	1.20773	0.83057-1.75616	0.377	1.14703	0.84626-1.55470	0.845	1.06031	0.59558-1.88765	0.396	1.17116	0.82329-1.66604	-0.04861	0.63598	0.135	20.1493	13	0.09155	19.761	12	0.07174	4.56087e-86	0.132645
ebi-a-GCST90002103	9	0.649	0.84345	0.41796-1.7021	0.302	0.7856	0.49662-1.24276	0.379	0.8089	0.50450-1.29696	0.136	0.51165	0.23142-1.13121	0.344	0.78374	0.48746-1.26009	-0.03643	0.87164	0.29	12.548	8	0.12838	12.4978	7	0.08533	7.79679e-50	0.0931842
ebi-a-GCST90001648	15	0.243	1.54554	0.76887-3.1067	0.233	1.36452	0.81888-2.27375	0.379	1.20482	0.79561-1.82452	0.705	1.25023	0.40244-3.88400	0.3	1.36035	0.77641-2.38345	-0.07388	0.40044	0.874	8.6413	14	0.85332	7.88557	13	0.85097	5.63696e-225	0.202336
ebi-a-GCST90001578	21	0.125	2.13937	0.84594-5.4104	0.57	1.22149	0.61219-2.43722	0.381	1.23136	0.77303-1.96143	0.378	0.56548	0.16356-1.95507	0.435	1.5453	0.52967-4.50835	-0.11137	0.19318	0.687	16.1675	20	0.70618	14.3475	19	0.76307	2.0997e-106	0.148497
ebi-a-GCST90002078	20	0.761	0.9331	0.60095-1.4488	0.867	0.96725	0.65593-1.42633	0.381	1.13841	0.85174-1.52156	0.911	0.96817	0.55374-1.69277	0.942	0.9837	0.63688-1.51940	0.08648	0.25404	0.949	10.0932	19	0.95061	8.70489	18	0.96619	3.73311e-149	0.103783
ebi-a-GCST90001689	31	0.208	0.92334	0.81784-1.0425	0.18	0.89645	0.76395-1.05192	0.382	0.95187	0.85213-1.06328	0.909	0.98661	0.78435-1.24104	0.418	0.93917	0.80849-1.09098	0.05732	0.23987	0.604	26.8404	30	0.63164	25.4005	29	0.65731	1.88779e-169	0.056589
ebi-a-GCST90002073	19	0.566	1.14432	0.72894-1.7964	0.534	1.12742	0.77284-1.64470	0.383	1.13124	0.85756-1.49226	0.521	0.78416	0.37855-1.62433	0.59	1.11651	0.75314-1.65520	-0.00559	0.95026	0.811	13.2125	18	0.7788	13.2085	17	0.72212	0	0.158547
ebi-a-GCST90001569	19	0.99	0.99535	0.49270-2.0108	0.774	1.10105	0.57024-2.12598	0.384	0.82555	0.53624-1.27095	0.743	1.1939	0.42072-3.38797	0.739	1.13483	0.54586-2.35929	-0.05082	0.51794	0.579	16.4771	18	0.55929	16.0412	17	0.52092	7.9333e-107	0.109297
ebi-a-GCST90001470	20	0.98	1.00868	0.51945-1.9587	0.201	1.41151	0.83269-2.39266	0.386	1.18077	0.81084-1.71949	0.328	1.53155	0.66692-3.51713	0.32	1.41389	0.72680-2.75052	0.04475	0.57936	0.697	15.5034	19	0.69011	15.1847	18	0.64925	2.25017e-130	0.127006
ebi-a-GCST90001483	25	0.142	0.79961	0.59948-1.0666	0.663	0.93741	0.70075-1.25400	0.387	0.90763	0.72884-1.13026	0.982	0.99408	0.59101-1.67202	0.267	0.849	0.64025-1.12581	0.09018	0.19648	0.92	14.5305	24	0.93375	12.761	23	0.95698	0	0.0902896
ebi-a-GCST90002063	22	0.256	0.80796	0.56512-1.1552	0.308	0.82064	0.56127-1.19989	0.387	0.89191	0.68830-1.15575	0.73	1.1204	0.59210-2.12009	0.433	0.86442	0.60456-1.23597	0.04998	0.43613	0.439	22.4665	21	0.37307	21.7788	20	0.35263	2.02983e-122	0.0790828
ebi-a-GCST90002065	13	0.478	1.31925	0.62970-2.7639	0.78	0.92122	0.51784-1.63881	0.39	1.22647	0.77024-1.95294	0.594	0.76595	0.29514-1.98779	0.915	1.03898	0.52227-2.06692	-0.0288	0.80285	0.201	16.3145	12	0.17725	16.2181	11	0.13323	6.72241e-66	0.130477
ebi-a-GCST90001831	11	0.237	0.50783	0.17800-1.4488	0.315	0.73084	0.39664-1.34664	0.391	0.80713	0.49465-1.31703	0.502	0.73078	0.30245-1.76572	0.4	0.71816	0.34327-1.50250	0.1233	0.35283	0.996	2.56932	10	0.98983	1.60951	9	0.99625	7.89402e-80	0.113383
ebi-a-GCST90001514	17	0.199	1.3349	0.87628-2.0335	0.863	0.96412	0.63588-1.46180	0.391	1.13296	0.85174-1.50703	0.669	0.86743	0.45746-1.64483	0.972	1.00867	0.63085-1.61278	-0.07573	0.31628	0.422	16.2379	16	0.43649	15.1521	15	0.44052	1.71874e-118	0.11321
ebi-a-GCST90001826	15	0.936	1.02902	0.51855-2.0420	0.798	0.92843	0.52558-1.64006	0.394	1.19843	0.79016-1.81765	0.874	1.07755	0.43487-2.67005	0.917	0.96512	0.50041-1.86136	0.04523	0.59239	0.785	9.91098	14	0.76866	9.60971	13	0.7255	2.80403e-86	0.108795
ebi-a-GCST90002116	19	0.883	1.03191	0.68405-1.5567	0.543	0.90198	0.64682-1.25782	0.394	0.89524	0.69395-1.15492	0.898	1.03891	0.58434-1.84708	0.614	0.92006	0.66936-1.26467	-0.06505	0.39893	0.563	17.9116	18	0.46149	17.156	17	0.44385	0	0.108037
ebi-a-GCST90001472	17	0.483	0.86018	0.57057-1.2968	0.175	0.7716	0.53035-1.12258	0.395	0.88379	0.66496-1.17465	0.293	1.61076	0.68240-3.80205	0.116	0.74261	0.52283-1.05478	0.01749	0.85574	0.334	17.9319	16	0.3279	17.8911	15	0.26843	0	0.124317
ebi-a-GCST90001452	19	0.021	0.59239	0.39518-0.8880	0.217	0.76383	0.49779-1.17205	0.397	0.8775	0.64870-1.18699	0.983	0.99186	0.46978-2.09414	0.177	0.75332	0.50749-1.11822	0.20574	0.01232	0.389	18.6247	18	0.41527	10.7881	17	0.86736	8.11655e-99	0.0799108
ebi-a-GCST90001929	16	0.647	1.10246	0.73282-1.6585	0.732	1.07456	0.71249-1.62063	0.398	1.14272	0.83840-1.55749	0.715	1.14963	0.55108-2.39829	0.694	1.07774	0.74769-1.55349	0.01654	0.7956	0.992	5.35414	15	0.98868	5.28443	14	0.98145	1.02959e-80	0.0842877
ebi-a-GCST90001643	25	0.82	1.02682	0.81924-1.2870	0.325	0.87473	0.66990-1.14218	0.4	0.92175	0.76256-1.11418	0.564	0.86573	0.53418-1.40307	0.675	0.95291	0.76262-1.19068	-0.09037	0.11995	0.362	25.4948	24	0.37929	22.8866	23	0.46741	4.04226e-146	0.0645478
ebi-a-GCST90002057	15	0.255	0.65541	0.32711-1.3132	0.421	0.80539	0.47522-1.36496	0.4	0.84614	0.57322-1.24900	0.33	0.64001	0.26887-1.52344	0.27	0.72083	0.41229-1.26026	0.07463	0.40021	0.65	11.9045	14	0.61397	11.148	13	0.59842	3.97795e-97	0.0980625
ebi-a-GCST90001707	17	0.302	1.19514	0.86185-1.6573	0.251	1.17636	0.89126-1.55266	0.401	1.09965	0.88108-1.37244	0.91	0.9655	0.52922-1.76144	0.248	1.1915	0.89473-1.58671	-0.06199	0.50749	0.928	8.80508	16	0.92122	8.34406	15	0.90925	0	0.146015
ebi-a-GCST90001484	23	0.545	0.90809	0.66819-1.2341	0.772	0.9625	0.74280-1.24717	0.401	0.91243	0.73675-1.13001	0.956	1.0194	0.51986-1.99895	0.727	0.9532	0.73070-1.24346	0.00283	0.9665	0.844	15.6463	22	0.83305	15.6445	21	0.78928	0	0.112787
ebi-a-GCST90001694	22	0.77	0.9006	0.45071-1.7996	0.495	0.83443	0.49634-1.40281	0.402	0.82947	0.53576-1.28420	0.132	0.43999	0.15757-1.22865	0.816	0.94301	0.57925-1.53523	-0.02853	0.7635	0.046	36.5982	21	0.01871	36.4287	20	0.01369	4.03087e-121	0.11367
ebi-a-GCST90002106	16	0.346	1.17307	0.85116-1.6167	0.388	1.13051	0.85546-1.49401	0.402	1.09377	0.88683-1.34898	0.203	1.48468	0.82985-2.65623	0.59	1.08103	0.81931-1.42636	-0.04114	0.58087	0.662	12.8807	15	0.61151	12.5612	14	0.56133	0	0.102053
ebi-a-GCST90001739	19	0.608	1.217	0.58255-2.5424	0.392	1.3062	0.70819-2.40919	0.405	1.19921	0.78195-1.83912	0.841	1.10821	0.41224-2.97915	0.663	1.17249	0.57960-2.37188	-0.00416	0.96203	0.557	17.2885	18	0.50336	17.2862	17	0.43515	2.60956e-95	0.115344
ebi-a-GCST90001664	37	0.89	0.99074	0.86886-1.1297	0.758	0.97722	0.84403-1.13142	0.406	0.95101	0.84484-1.07052	0.639	0.95091	0.77196-1.17134	0.91	0.99332	0.88554-1.11421	-0.06746	0.18571	0.126	48.4303	36	0.08069	46.0337	35	0.10044	1.6097e-270	0.0601213
ebi-a-GCST90001800	25	0.158	0.73983	0.49355-1.1090	0.262	0.8064	0.55368-1.17448	0.408	0.88226	0.65557-1.18735	0.709	0.88217	0.46021-1.69101	0.169	0.79838	0.58498-1.08962	0.0773	0.22785	0.121	34.5193	24	0.07585	32.3596	23	0.09289	4.32837e-305	0.11251
ebi-a-GCST90001718	16	0.901	0.98007	0.71891-1.3361	0.449	1.12201	0.83287-1.51153	0.41	1.10312	0.87324-1.39353	0.705	0.88894	0.48897-1.61611	0.598	1.08185	0.81285-1.43986	0.10114	0.27907	0.494	15.9662	15	0.3843	14.6402	14	0.40318	0	0.133539
ebi-a-GCST90001672	22	0.806	0.93697	0.56058-1.5661	0.622	0.8897	0.55914-1.41569	0.411	0.86547	0.61344-1.22105	0.504	0.78371	0.38825-1.58199	0.79	0.93454	0.57205-1.52673	-0.0367	0.68258	0.19	27.7952	21	0.14606	27.5579	20	0.12028	3.64978e-293	0.133907
ebi-a-GCST90001616	15	0.108	0.65695	0.40781-1.0583	0.209	0.73267	0.45080-1.19078	0.413	0.85775	0.59413-1.23835	0.353	0.62799	0.24328-1.62104	0.156	0.70623	0.44809-1.11308	0.11603	0.10935	0.556	12.93	14	0.53204	9.97551	13	0.69594	4.37944e-74	0.0757011
ebi-a-GCST90001714	4	0.303	0.56475	0.24987-1.2764	0.271	0.65996	0.31477-1.38370	0.414	0.77793	0.42591-1.42090	0.593	0.72938	0.25852-2.05784	0.341	0.65772	0.31792-1.36070	0.11894	0.3717	0.539	2.27406	3	0.51751	0.96955	2	0.61584	1.75814e-23	0.0695445
ebi-a-GCST90001793	18	0.923	1.03641	0.50563-2.1244	0.508	0.82302	0.46262-1.46419	0.415	0.84781	0.57024-1.26049	0.212	0.5735	0.24732-1.32986	0.397	0.75707	0.40414-1.41821	-0.04965	0.51981	0.596	15.2073	17	0.58055	14.7742	16	0.54123	1.78521e-150	0.107376
ebi-a-GCST90002055	14	0.522	0.7721	0.35816-1.6645	0.214	0.66589	0.35041-1.26539	0.415	0.82595	0.52169-1.30766	0.4	0.6552	0.25256-1.69973	0.262	0.63277	0.29425-1.36077	0.02069	0.82992	0.493	13.1783	13	0.43414	13.1256	12	0.35998	2.27764e-77	0.100008
ebi-a-GCST90001540	23	0.635	0.81668	0.35812-1.8624	0.86	0.952	0.55081-1.64541	0.417	0.84464	0.56168-1.27016	0.907	1.06052	0.40000-2.81178	0.614	1.26974	0.50887-3.16832	0.00794	0.92747	0.967	11.0761	22	0.97365	11.0676	21	0.96145	2.8601e-129	0.105506
ebi-a-GCST90001907	23	0.244	1.17086	0.90474-1.5153	0.32	1.14721	0.87512-1.50390	0.418	1.08887	0.88631-1.33774	0.82	1.08247	0.55219-2.12201	0.254	1.15482	0.90760-1.46937	-0.05016	0.36997	0.909	13.597	22	0.91516	12.7576	21	0.91688	7.73194e-165	0.0752962
ebi-a-GCST90001661	21	0.408	0.81056	0.49857-1.3178	0.919	0.97454	0.59359-1.59997	0.42	1.14125	0.82776-1.57346	0.951	1.02328	0.49824-2.10160	0.985	0.9962	0.67885-1.46191	0.1216	0.08167	0.564	18.983	20	0.52293	15.6027	19	0.6836	4.33067e-117	0.0915204
ebi-a-GCST90001428	23	0.552	1.08509	0.83243-1.4144	0.944	0.98926	0.73004-1.34054	0.42	0.90107	0.69945-1.16081	0.786	0.91716	0.49524-1.69853	0.951	1.00817	0.77972-1.30356	-0.14372	0.01641	0.194	28.938	22	0.14664	21.8561	21	0.40784	3.15564e-113	0.0686495
ebi-a-GCST90002096	18	0.936	1.03399	0.46474-2.3005	0.363	1.24837	0.77371-2.01423	0.42	1.14897	0.81955-1.61080	0.51	1.25609	0.64631-2.44120	0.271	1.37167	0.79607-2.36346	0.0326	0.77921	0.701	13.6168	17	0.69402	13.5355	16	0.63327	6.05515e-123	0.145062
ebi-a-GCST90002020	16	0.453	0.74748	0.35717-1.5643	0.482	1.18547	0.73788-1.90456	0.42	1.16088	0.80753-1.66887	0.131	1.87694	0.86639-4.06617	0.621	1.20158	0.58868-2.45260	0.15929	0.20437	0.153	20.1429	15	0.16652	17.8795	14	0.21233	3.7417e-88	0.133273
ebi-a-GCST90001933	23	0.431	1.11853	0.85076-1.4706	0.283	1.17764	0.87356-1.58758	0.422	1.08934	0.88387-1.34257	0.804	1.06115	0.66703-1.68812	0.456	1.10446	0.85447-1.42759	-0.02025	0.77205	0.797	16.3955	22	0.79578	16.3094	21	0.75202	2.27292e-143	0.0696734
ebi-a-GCST90001543	22	0.976	0.99371	0.66052-1.4950	0.551	1.12912	0.75782-1.68232	0.423	1.13672	0.83075-1.55539	0.507	0.77817	0.37575-1.61159	0.533	1.12633	0.77995-1.62653	0.06922	0.32612	0.154	28.705	21	0.12127	27.3207	20	0.12648	2.43754e-119	0.0899424
ebi-a-GCST90001923	12	0.623	1.14034	0.68640-1.8945	0.714	0.91823	0.58209-1.44850	0.424	1.17153	0.79492-1.72657	0.959	0.975	0.37959-2.50434	0.492	1.14176	0.79217-1.64563	0.01602	0.86557	0.139	19.1334	11	0.05874	19.0758	10	0.03931	2.07637e-56	0.0859734
ebi-a-GCST90001621	29	0.042	1.84835	1.05014-3.2533	0.185	1.41971	0.84550-2.38387	0.425	1.14579	0.81992-1.60117	0.472	1.50022	0.50400-4.46557	0.206	1.74116	0.75248-4.02885	-0.13221	0.05344	0.306	30.0632	28	0.3602	25.9839	27	0.5195	6.93771e-195	0.116677
ebi-a-GCST90002018	15	0.356	1.23889	0.79871-1.9216	0.544	1.15122	0.73046-1.81435	0.427	1.14022	0.82501-1.57586	0.845	1.07434	0.52945-2.18004	0.544	1.14176	0.75220-1.73306	-0.04045	0.59274	0.984	5.8539	14	0.97004	5.55321	13	0.96092	1.70061e-87	0.0865191
ebi-a-GCST90001538	29	0.224	0.89993	0.76210-1.0627	0.426	0.92498	0.76336-1.12082	0.428	0.94269	0.81482-1.09064	0.753	1.08849	0.64456-1.83818	0.427	0.93577	0.79619-1.09982	0.0507	0.26474	0.791	21.7017	28	0.79491	20.4045	27	0.81336	1.49466e-157	0.0587864
ebi-a-GCST90001726	23	0.877	0.96942	0.65773-1.4288	0.975	1.00634	0.68286-1.48305	0.429	1.13254	0.83223-1.54122	0.578	1.26836	0.55598-2.89350	0.908	0.98125	0.71471-1.34720	0.1006	0.2197	0.125	30.9214	22	0.09774	28.7317	21	0.12059	1.75156e-115	0.0844854
ebi-a-GCST90001491	21	0.483	0.91937	0.73043-1.1572	0.727	0.96033	0.76540-1.20491	0.429	0.93358	0.78744-1.10685	0.988	1.0027	0.71205-1.41197	0.683	0.95796	0.78186-1.17374	0.01157	0.84793	0.931	12.0021	20	0.916	11.9643	19	0.88714	0	0.0848791
ebi-a-GCST90001941	11	0.364	0.83392	0.57460-1.2103	0.417	0.85733	0.59123-1.24320	0.429	0.88757	0.66048-1.19274	0.557	0.82912	0.45300-1.51752	0.392	0.8581	0.61373-1.19976	0.05873	0.57926	0.51	10.6401	10	0.38623	10.2629	9	0.32963	9.30906e-59	0.0635353
ebi-a-GCST90001444	20	0.168	1.92303	0.78816-4.6920	0.315	1.40767	0.72295-2.74088	0.43	1.22306	0.74146-2.01748	0.624	1.31665	0.44622-3.88504	0.603	1.27549	0.51730-3.14494	-0.10518	0.24747	0.351	21.2995	19	0.32049	19.7331	18	0.34805	1.91204e-100	0.136886
ebi-a-GCST90001398	19	0.943	0.96966	0.42356-2.2199	0.818	0.92729	0.48711-1.76527	0.433	0.81359	0.48603-1.36190	0.279	0.53915	0.18206-1.59660	0.554	0.82453	0.44054-1.54320	-0.04998	0.59795	0.091	28.6486	18	0.05285	28.17	17	0.04299	2.04448e-98	0.109376
ebi-a-GCST90001690	45	0.558	0.9755	0.89848-1.0591	0.736	0.98137	0.87975-1.09473	0.433	0.97064	0.90097-1.04571	0.614	1.03159	0.91487-1.16320	0.866	0.99088	0.89169-1.10109	-0.012	0.78042	0.561	41.7934	44	0.56664	41.7147	43	0.52705	2.03106e-254	0.0534676
ebi-a-GCST90001984	10	0.915	1.04971	0.44153-2.4956	0.363	1.26353	0.76365-2.09060	0.436	1.17282	0.78556-1.75097	0.403	1.40519	0.65725-3.00428	0.341	1.30106	0.77912-2.17266	0.03298	0.78427	0.599	7.52697	9	0.58243	7.44681	8	0.48928	6.49308e-126	0.113329
ebi-a-GCST90001992	33	0.637	0.94	0.72863-1.2127	0.601	1.07827	0.81301-1.43008	0.437	0.92516	0.76038-1.12564	0.995	1.00136	0.62708-1.59903	0.674	1.06105	0.80709-1.39492	-0.01037	0.84595	0.449	31.8867	32	0.47238	31.8473	31	0.42417	6.5713e-187	0.0667367
ebi-a-GCST90001900	4	0.256	0.44768	0.16449-1.2184	0.254	0.70223	0.38274-1.28843	0.439	0.80272	0.45999-1.40083	0.733	0.81709	0.28406-2.35030	0.318	0.67833	0.35896-1.28185	0.18907	0.30277	0.461	2.5748	3	0.46192	0.68282	2	0.71077	2.72111e-67	0.105428
ebi-a-GCST90001505	19	0.702	1.11333	0.64868-1.9108	0.99	0.99685	0.61522-1.61520	0.442	1.14889	0.80622-1.63720	0.746	1.13487	0.53341-2.41455	0.747	1.08817	0.65590-1.80532	0.01188	0.87904	0.47	18.7057	18	0.41015	18.6794	17	0.34724	1.62664e-115	0.0956807
ebi-a-GCST90001436	25	0.694	0.93436	0.66935-1.3043	0.671	0.92646	0.65135-1.31774	0.443	0.90245	0.69409-1.17335	0.963	0.98609	0.54644-1.77948	0.567	0.9095	0.66007-1.25320	-0.01703	0.74367	0.753	19.7281	24	0.71213	19.6186	23	0.6648	1.25011e-141	0.0720678
ebi-a-GCST90001567	19	0.11	0.6437	0.38568-1.0744	0.17	0.70329	0.42562-1.16213	0.444	0.85557	0.57368-1.27598	0.452	0.69351	0.27279-1.76312	0.118	0.66984	0.41540-1.08013	0.10196	0.12027	0.178	24.4575	18	0.1406	21.1316	17	0.22046	1.18623e-94	0.0859621
ebi-a-GCST90001928	13	0.573	0.88493	0.58614-1.3360	0.494	0.85563	0.54719-1.33794	0.445	0.88344	0.64271-1.21433	0.478	0.78364	0.40832-1.50396	0.545	0.88123	0.59189-1.31200	-0.00109	0.99015	0.935	6.35785	12	0.89698	6.35769	11	0.84846	3.29378e-67	0.06914
ebi-a-GCST90001516	16	0.172	1.49891	0.86357-2.6017	0.688	1.10292	0.68329-1.78025	0.447	1.14383	0.80873-1.61778	0.673	1.16504	0.58174-2.33319	0.615	1.15255	0.66998-1.98271	-0.11164	0.24152	0.278	18.8591	15	0.22019	17.0387	14	0.25412	2.73941e-95	0.111575
ebi-a-GCST90001869	32	0.151	1.39293	0.89592-2.1657	0.301	1.24166	0.82379-1.87150	0.447	1.11101	0.84677-1.45773	0.611	1.18974	0.61363-2.30676	0.463	1.17233	0.77049-1.78376	-0.07819	0.21237	0.831	23.9259	31	0.81356	22.3023	30	0.84282	3.24312e-206	0.0981348
ebi-a-GCST90001744	9	0.551	0.43142	0.03102-5.9999	0.389	0.60651	0.19448-1.89144	0.45	0.71755	0.30331-1.69753	0.339	0.39244	0.06467-2.38137	0.426	0.54292	0.13011-2.26552	0.08037	0.69849	0.368	9.05346	8	0.33781	8.84748	7	0.26379	1.90948e-42	0.110614
ebi-a-GCST90001502	35	0.689	1.02856	0.89714-1.1792	0.989	0.9988	0.83824-1.19010	0.452	1.04556	0.93106-1.17415	0.674	1.06711	0.79079-1.43998	0.491	1.05544	0.90687-1.22835	0.02356	0.65993	0.757	26.6103	34	0.8128	26.4131	33	0.78477	0	0.0612754
ebi-a-GCST90001754	15	0.749	0.8459	0.31010-2.3075	0.903	0.96101	0.50740-1.82015	0.452	1.18923	0.75733-1.86744	0.93	0.95271	0.33119-2.74058	0.852	0.9193	0.38601-2.18931	0.07573	0.46957	0.606	12.335	14	0.57942	11.7801	13	0.54576	2.82488e-93	0.107324
ebi-a-GCST90001808	26	0.762	0.89817	0.45174-1.7858	0.714	0.92611	0.61458-1.39557	0.452	1.13748	0.81332-1.59084	0.867	0.9508	0.53070-1.70345	0.794	0.9508	0.65378-1.38276	0.0824	0.44658	0.126	34.3741	25	0.10015	33.5373	24	0.09323	0	0.165071
ebi-a-GCST90001602	18	0.689	1.07448	0.76037-1.5183	0.928	0.982	0.66275-1.45504	0.454	0.89459	0.66823-1.19764	0.67	1.20381	0.51987-2.78750	0.993	0.99846	0.72439-1.37622	-0.11277	0.10222	0.445	18.8757	17	0.33572	15.8705	16	0.46204	3.43075e-90	0.066987
ebi-a-GCST90001605	16	0.765	1.06147	0.72389-1.5565	0.773	0.94271	0.63125-1.40783	0.454	0.88854	0.65197-1.21095	0.315	1.65927	0.63902-4.30845	0.833	0.96249	0.67871-1.36494	-0.10516	0.14386	0.656	14.3075	15	0.50234	11.9103	14	0.6135	1.04843e-80	0.067042
ebi-a-GCST90001847	25	0.589	1.09059	0.79984-1.4870	0.569	1.10798	0.77871-1.57646	0.457	0.91614	0.72741-1.15385	0.696	0.88592	0.48569-1.61593	0.82	1.03455	0.77489-1.38122	-0.08737	0.11275	0.621	20.4409	24	0.67145	17.7219	23	0.7724	1.1499e-192	0.0747059
ebi-a-GCST90001741	19	0.684	0.91714	0.60913-1.3809	0.789	0.94969	0.65044-1.38662	0.457	1.14234	0.80454-1.62198	0.573	1.26097	0.57121-2.78363	0.913	1.01781	0.74433-1.39175	0.141	0.09162	0.085	31.398	18	0.02588	26.4282	17	0.067	4.89672e-99	0.0844967
ebi-a-GCST90001773	31	0.806	0.96757	0.74554-1.2557	0.973	0.99499	0.74008-1.33770	0.459	0.92737	0.75951-1.13234	0.876	0.9608	0.58413-1.58038	0.304	1.17343	0.86964-1.58335	-0.02412	0.61705	0.305	32.5625	30	0.34184	32.2781	29	0.3078	2.80221e-207	0.0670703
ebi-a-GCST90001508	23	0.129	0.82972	0.65815-1.0460	0.15	0.82964	0.64346-1.06970	0.46	0.92931	0.76506-1.12882	0.144	0.70018	0.44140-1.11068	0.196	0.8621	0.69303-1.07242	0.09928	0.11733	0.307	25.6493	22	0.26704	22.7586	21	0.35699	9.99478e-158	0.0634128
ebi-a-GCST90002027	22	0.686	1.17389	0.54539-2.5267	0.739	0.91751	0.55254-1.52356	0.466	1.13682	0.80512-1.60517	0.693	0.83668	0.34899-2.00587	0.659	0.86303	0.45291-1.64453	-0.00885	0.92771	0.756	16.1719	21	0.75992	16.1635	20	0.70643	4.48541e-131	0.0998528
ebi-a-GCST90001684	14	0.854	0.901	0.30416-2.6690	0.65	1.16525	0.60205-2.25531	0.466	1.19818	0.73663-1.94893	0.563	1.39413	0.46481-4.18147	0.675	1.19821	0.52508-2.73430	0.06187	0.57561	0.939	6.6355	13	0.91995	6.30434	12	0.89997	1.31193e-72	0.103024
ebi-a-GCST90001913	14	0.927	0.96862	0.49590-1.8920	0.584	1.17854	0.65508-2.12027	0.467	1.16629	0.77075-1.76482	0.402	1.46493	0.61757-3.47496	0.956	1.01971	0.51703-2.01112	0.05991	0.5021	0.834	8.56924	13	0.80464	8.09037	12	0.77803	1.55038e-72	0.0900234
ebi-a-GCST90001957	17	0.689	0.94334	0.71315-1.2478	0.628	1.05179	0.85758-1.28999	0.468	1.06844	0.89338-1.27781	0.554	1.19993	0.66413-2.16799	0.691	1.04256	0.85195-1.27582	0.08091	0.27411	0.83	11.9497	16	0.74744	10.661	15	0.77623	0	0.0963255
ebi-a-GCST90001630	21	0.113	1.83965	0.89536-3.7798	0.297	1.37569	0.75544-2.50518	0.472	1.16992	0.76304-1.79377	0.627	1.30021	0.45798-3.69133	0.64	1.20039	0.56452-2.55249	-0.1011	0.14838	0.334	22.34	20	0.32235	19.9562	19	0.39722	3.01736e-128	0.112554
ebi-a-GCST90001626	20	0.98	1.00879	0.51982-1.9577	0.81	0.93538	0.54201-1.61422	0.475	0.86347	0.57706-1.29205	0.842	1.09569	0.45050-2.66492	0.741	1.09569	0.64290-1.86739	-0.03719	0.56972	0.625	16.3972	19	0.63063	16.0619	18	0.58823	3.41686e-133	0.0918197
ebi-a-GCST90001635	22	0.879	1.05271	0.54740-2.0245	0.405	0.79961	0.47258-1.35295	0.476	0.87681	0.61097-1.25831	0.751	0.87119	0.37578-2.01971	0.315	0.69016	0.34060-1.39846	-0.0564	0.5159	0.44	21.7644	21	0.41319	21.2985	20	0.37975	8.99734e-166	0.0907031
ebi-a-GCST90002062	18	0.08	0.51999	0.26199-1.0321	0.498	0.82745	0.47826-1.43159	0.478	0.87271	0.59901-1.27145	0.739	0.86029	0.36001-2.05575	0.556	0.82471	0.43949-1.54759	0.14673	0.09558	0.858	11.2167	17	0.84508	8.07968	16	0.94646	6.817e-101	0.083715
ebi-a-GCST90001752	23	0.03	0.64685	0.44864-0.9326	0.388	0.84855	0.58428-1.23234	0.478	0.91064	0.70302-1.17956	0.703	1.17241	0.52293-2.62859	0.196	0.78035	0.54198-1.12356	0.13192	0.01703	0.524	19.959	22	0.5856	13.2436	21	0.89985	5.56182e-173	0.0720567
ebi-a-GCST90002097	15	0.99	0.9953	0.48147-2.0575	0.788	1.0595	0.69506-1.61502	0.483	0.89519	0.65686-1.22001	0.756	0.89476	0.44992-1.77939	0.771	1.06933	0.68646-1.66574	-0.04244	0.75681	0.63	12.0386	14	0.6032	11.9386	13	0.53269	1.89771e-124	0.0961566
ebi-a-GCST90002114	18	0.854	0.91159	0.34665-2.3972	0.593	1.1868	0.63310-2.22474	0.484	1.17772	0.74515-1.86142	0.294	1.75309	0.63429-4.84529	0.779	1.13046	0.48671-2.62566	0.06546	0.56375	0.969	7.84595	17	0.96973	7.49843	16	0.96242	1.94579e-90	0.10739
ebi-a-GCST90001792	16	0.58	0.92615	0.71050-1.2073	0.732	0.94927	0.70491-1.27833	0.484	0.92371	0.73975-1.15341	0.698	0.90361	0.54711-1.49243	0.637	0.93987	0.73012-1.20987	-0.00201	0.97196	0.926	9.2313	15	0.86512	9.23002	14	0.81604	9.53975e-136	0.0628171
ebi-a-GCST90001524	18	0.952	0.9855	0.61926-1.5684	0.938	1.01577	0.68488-1.50653	0.484	1.10931	0.82938-1.48372	0.774	1.09395	0.59806-2.00098	0.991	1.00237	0.68222-1.47275	0.04781	0.52648	0.375	19.059	17	0.32516	18.5723	16	0.29146	1.5277e-108	0.0894016
ebi-a-GCST90001695	282	0.696	0.99994	0.99963-1.0002	0.168	0.99976	0.99941-1.00010	0.486	0.99992	0.99970-1.00014	0.212	0.99956	0.99886-1.00025	0.349	0.99981	0.99942-1.00021	-0.00643	0.86521	0.42	283.532	281	0.44647	283.503	280	0.43033	NA	0.0500002
ebi-a-GCST90001920	18	0.386	0.85146	0.59761-1.2131	0.13	0.73927	0.50021-1.09259	0.487	0.90643	0.68713-1.19572	0.551	0.80759	0.40573-1.60747	0.261	0.80759	0.56316-1.15809	0.03544	0.57316	0.42	17.9054	17	0.39483	17.5427	16	0.35135	6.1785e-101	0.067444
ebi-a-GCST90001628	26	0.606	1.10062	0.76787-1.5776	0.804	1.04525	0.73630-1.48384	0.489	0.91301	0.70565-1.18129	0.73	0.89694	0.48730-1.65094	0.767	1.04521	0.78259-1.39597	-0.0804	0.16214	0.444	25.4838	25	0.43554	23.4036	24	0.49609	3.37314e-220	0.0761281
ebi-a-GCST90001577	24	0.344	0.71156	0.35679-1.4191	0.242	0.68067	0.35722-1.29701	0.491	0.86315	0.56772-1.31231	0.326	0.52581	0.14996-1.84370	0.186	0.61575	0.30662-1.23655	0.04844	0.49454	0.332	25.2748	23	0.33628	24.7323	22	0.31005	2.48033e-122	0.0885517
ebi-a-GCST90002044	8	0.99	0.98328	0.07085-13.6455	0.357	1.40883	0.67974-2.91994	0.491	1.21431	0.69842-2.11130	0.454	1.56018	0.51952-4.68542	0.464	1.46177	0.55903-3.82230	0.04179	0.87748	0.617	5.31803	7	0.62121	5.29215	6	0.50692	7.93737e-41	0.119822
ebi-a-GCST90001751	23	0.74	0.92855	0.60299-1.4299	0.913	1.02615	0.64571-1.63074	0.493	1.10897	0.82488-1.49090	0.81	0.90633	0.41002-2.00341	0.884	0.96859	0.63438-1.47888	0.06689	0.28072	0.898	14.1659	22	0.89549	12.94	21	0.91071	5.02358e-154	0.0796329
ebi-a-GCST90001891	8	0.204	0.47972	0.17460-1.3181	0.27	0.69175	0.35918-1.33224	0.493	0.82823	0.48292-1.42045	0.923	0.94163	0.29202-3.03638	0.266	0.64856	0.32147-1.30844	0.14939	0.25709	0.613	4.25812	7	0.74961	2.69005	6	0.84662	1.69234e-82	0.10096
ebi-a-GCST90001896	13	0.613	1.1955	0.61062-2.3406	0.704	0.91036	0.56065-1.47822	0.497	0.87902	0.60604-1.27495	0.852	0.90399	0.32108-2.54521	0.731	0.90399	0.51554-1.58516	-0.10393	0.30447	0.645	9.67273	12	0.64465	8.5125	11	0.66679	5.35319e-137	0.0900383
ebi-a-GCST90002053	16	0.685	1.06306	0.79586-1.4200	0.885	0.97658	0.70805-1.34695	0.497	1.07973	0.86520-1.34746	0.079	1.95533	0.97305-3.92922	0.939	1.01162	0.75583-1.35397	0.01073	0.87233	0.586	13.4857	15	0.56483	13.4589	14	0.49075	1.43776e-88	0.0699018
ebi-a-GCST90001410	12	0.74	0.81039	0.24179-2.7162	0.612	0.83288	0.41087-1.68837	0.5	0.82645	0.47506-1.43777	0.704	0.80856	0.27756-2.35546	0.66	0.80402	0.31214-2.07106	0.00389	0.97217	0.996	2.23737	11	0.99747	2.23609	10	0.99419	8.72285e-64	0.0826956
ebi-a-GCST90001513	19	0.896	1.05278	0.49343-2.2462	0.085	0.61924	0.35910-1.06784	0.502	0.8593	0.55184-1.33805	0.407	0.64898	0.23938-1.75945	0.156	0.53428	0.23326-1.22375	-0.07018	0.52258	0.086	25.2818	18	0.11735	24.6634	17	0.1025	1.31676e-94	0.0842999
ebi-a-GCST90001717	19	0.591	1.07924	0.82170-1.4175	0.368	1.13529	0.86130-1.49646	0.505	1.07471	0.86945-1.32843	0.857	0.95053	0.55230-1.63591	0.355	1.13992	0.86997-1.49364	-0.00359	0.96227	0.667	15.1426	18	0.65215	15.1403	17	0.58537	0	0.0944306
ebi-a-GCST90001574	22	0.995	0.99835	0.62508-1.5945	0.662	0.90393	0.57503-1.42097	0.505	0.90027	0.66091-1.22633	0.643	1.17328	0.60314-2.28235	0.893	0.96451	0.57448-1.61934	-0.03638	0.57087	0.664	17.8917	21	0.65585	17.5596	20	0.61639	1.34729e-130	0.0726756
ebi-a-GCST90001526	18	0.179	1.40511	0.87395-2.2591	0.472	1.13039	0.80965-1.57818	0.506	1.0869	0.85041-1.38916	0.775	1.07891	0.64671-1.79996	0.419	1.16321	0.81308-1.66411	-0.11119	0.23596	0.483	17.6241	17	0.41292	16.0983	16	0.44612	2.17192e-186	0.0882603
ebi-a-GCST90002007	16	0.412	0.9139	0.74184-1.1259	0.83	0.97323	0.75995-1.24637	0.506	0.94452	0.79835-1.11746	0.441	0.84332	0.55280-1.28651	0.367	0.91247	0.75220-1.10687	0.03929	0.60899	0.597	13.1215	15	0.59291	12.8477	14	0.53855	1.74269e-144	0.0572346
ebi-a-GCST90001721	17	0.777	1.07907	0.64353-1.8094	0.821	1.06081	0.63664-1.76757	0.507	1.13438	0.78178-1.64601	0.639	0.7739	0.27091-2.21080	0.983	1.00485	0.64615-1.56267	0.01842	0.78222	0.519	15.8866	16	0.4609	15.8032	15	0.39525	2.07224e-83	0.075786
ebi-a-GCST90001682	14	0.649	0.76376	0.24641-2.3673	0.624	1.192	0.59102-2.40408	0.507	1.19483	0.70612-2.02177	0.817	1.14189	0.37926-3.43806	0.787	1.14189	0.44383-2.93783	0.10479	0.39722	0.316	15.1575	13	0.29762	14.2427	12	0.28548	3.30294e-70	0.0997043
ebi-a-GCST90001870	12	0.964	0.99161	0.69349-1.4179	0.816	1.03473	0.77606-1.37962	0.508	1.08496	0.85222-1.38126	0.253	0.69044	0.37825-1.26032	0.884	1.02172	0.77067-1.35456	0.05949	0.50998	0.313	14.2275	11	0.22066	13.593	10	0.19238	5.05434e-96	0.0735963
ebi-a-GCST90001456	16	0.814	1.10485	0.48842-2.4993	0.555	1.21549	0.63533-2.32544	0.508	1.17225	0.73212-1.87696	0.768	1.17346	0.41380-3.32770	0.594	1.28172	0.52446-3.13240	0.01556	0.86434	0.875	9.56433	15	0.84621	9.53404	14	0.7954	2.6916e-80	0.0987985
ebi-a-GCST90001394	21	0.503	0.91829	0.71891-1.1730	0.892	1.0204	0.76333-1.36406	0.509	0.93342	0.76065-1.14543	0.8	1.08476	0.58297-2.01849	0.915	0.98667	0.77436-1.25718	0.01473	0.80254	0.377	21.5198	20	0.36713	21.4472	19	0.31263	3.7883e-105	0.0578084
ebi-a-GCST90001843	15	0.553	0.88074	0.58555-1.3247	0.343	0.84139	0.58894-1.20206	0.509	0.91218	0.69417-1.19865	0.684	0.88542	0.49916-1.57060	0.479	0.87739	0.61662-1.24846	0.01882	0.82428	0.818	10.0695	14	0.75708	10.0182	13	0.69245	2.18706e-154	0.0732671
ebi-a-GCST90001611	15	0.254	3.60987	0.43841-29.7235	0.587	1.25994	0.54762-2.89885	0.51	1.22115	0.67398-2.21254	0.44	0.56291	0.13628-2.32516	0.31	1.92748	0.56854-6.53458	-0.16714	0.31274	0.673	11.3763	14	0.65625	10.2733	13	0.67145	1.72372e-89	0.125531
ebi-a-GCST90001894	23	0.576	1.11521	0.76588-1.6239	0.658	1.09194	0.73967-1.61197	0.51	1.08908	0.84484-1.40393	0.466	1.30809	0.64360-2.65865	0.643	1.11354	0.71135-1.74311	-0.01172	0.86575	0.386	22.0805	22	0.45509	22.0497	21	0.39665	2.01619e-174	0.0767151
ebi-a-GCST90001897	16	0.983	1.00287	0.77932-1.2906	0.814	1.02922	0.81017-1.30749	0.511	0.92896	0.74588-1.15698	0.849	1.06746	0.55078-2.06884	0.835	0.98032	0.81607-1.17764	-0.08434	0.26297	0.209	23.6035	15	0.07214	21.5131	14	0.08919	6.22025e-91	0.0595506
ebi-a-GCST90001748	23	0.128	1.48076	0.91134-2.4059	0.249	1.31244	0.82671-2.08355	0.511	1.11966	0.79957-1.56790	0.745	1.15778	0.48442-2.76713	0.203	1.38482	0.85197-2.25093	-0.10109	0.14165	0.248	26.4334	22	0.23354	23.7913	21	0.30328	5.05944e-132	0.0815565
ebi-a-GCST90001956	18	0.7	0.94808	0.72604-1.2380	0.672	1.04642	0.84818-1.29099	0.512	1.06007	0.89048-1.26195	0.986	1.00423	0.62330-1.61798	0.751	1.0351	0.83946-1.27635	0.07461	0.29473	0.862	11.9743	17	0.80169	10.8008	16	0.82161	0	0.0860962
ebi-a-GCST90001845	25	0.537	1.15762	0.73251-1.8294	0.358	1.1948	0.81745-1.74634	0.516	1.09975	0.82568-1.46479	0.347	1.51245	0.64962-3.52130	0.381	1.18871	0.81288-1.73830	-0.02033	0.77786	0.22	29.3857	24	0.20595	29.2819	23	0.17114	1.12308e-254	0.0960222
ebi-a-GCST90001479	12	0.411	1.33435	0.69018-2.5797	0.428	1.29168	0.68574-2.43301	0.517	1.15337	0.74895-1.77619	0.714	0.8007	0.25169-2.54731	0.325	1.4184	0.72985-2.75655	-0.04646	0.579	0.493	10.1791	11	0.51436	9.8502	10	0.45373	7.79319e-61	0.0761705
ebi-a-GCST90001629	24	0.798	0.89189	0.37487-2.1220	0.737	0.91458	0.54286-1.54082	0.518	0.87496	0.58379-1.31134	0.253	0.54301	0.19575-1.50634	0.915	0.96747	0.53008-1.76578	-0.00477	0.96111	0.138	30.9706	23	0.12352	30.9672	22	0.09679	8.55892e-204	0.101324
ebi-a-GCST90001697	144	0.234	1.00471	0.99699-1.0125	0.325	1.00476	0.99532-1.01429	0.518	1.00198	0.99599-1.00801	0.353	0.99313	0.97882-1.00764	0.245	1.00493	0.99666-1.01326	-0.05055	0.27345	0.86	124.261	143	0.86878	123.052	142	0.87257	NA	0.050063
ebi-a-GCST90001789	19	0.962	1.01313	0.59345-1.7296	0.919	1.02391	0.64791-1.61809	0.521	0.89667	0.64254-1.25130	0.439	0.77028	0.40340-1.47082	0.867	0.96052	0.60291-1.53026	-0.04295	0.57003	0.552	18.0305	18	0.45364	17.6815	17	0.40919	8.56356e-160	0.077572
ebi-a-GCST90002079	20	0.542	0.71949	0.25467-2.0326	0.165	0.62315	0.31973-1.21450	0.525	0.84773	0.50929-1.41110	0.756	0.81972	0.23772-2.82658	0.286	0.58724	0.22693-1.51961	0.03199	0.72451	0.237	23.4129	19	0.21965	23.2473	18	0.18126	8.83229e-105	0.0979476
ebi-a-GCST90001919	22	0.754	1.05976	0.74123-1.5152	0.53	1.12827	0.77401-1.64466	0.526	0.91692	0.70121-1.19897	0.719	0.89204	0.48302-1.64743	0.566	1.10907	0.78316-1.57061	-0.08981	0.24945	0.285	24.6947	21	0.26063	23.0716	20	0.28529	2.76249e-112	0.0649641
ebi-a-GCST90001960	15	0.666	1.10062	0.71916-1.6844	0.592	1.11233	0.75355-1.64194	0.527	1.10802	0.80648-1.52232	0.767	1.1078	0.56981-2.15371	0.415	1.14953	0.83066-1.59080	0.0049	0.96184	0.243	19.1688	14	0.1586	19.1653	13	0.11807	7.12813e-80	0.0696053
ebi-a-GCST90001916	11	0.377	1.89253	0.49293-7.2661	0.795	1.10233	0.52873-2.29819	0.529	1.1935	0.68789-2.07074	0.511	1.55276	0.43851-5.49833	0.831	0.8791	0.27808-2.77907	-0.09018	0.47827	0.42	10.3922	10	0.40679	9.79643	9	0.36722	2.81002e-56	0.0926997
ebi-a-GCST90002113	16	0.371	1.56904	0.60351-4.0793	0.987	1.00525	0.52535-1.92356	0.534	0.86385	0.54472-1.36994	0.266	0.50372	0.15757-1.61028	0.243	0.53589	0.19610-1.46445	-0.13742	0.18749	0.336	16.904	15	0.32463	14.865	14	0.38745	1.15608e-91	0.0840812
ebi-a-GCST90001652	23	0.745	0.91288	0.53118-1.5689	0.832	1.05445	0.64619-1.72067	0.536	1.11494	0.79007-1.57339	0.549	0.78258	0.35519-1.72426	0.862	0.95312	0.55715-1.63051	0.06081	0.35808	0.465	22.7612	22	0.41532	21.8428	21	0.40862	9.21735e-115	0.0753818
ebi-a-GCST90002080	18	0.637	0.87012	0.49361-1.5338	0.56	0.84555	0.48097-1.48648	0.536	0.8835	0.59690-1.30772	0.523	1.38491	0.52067-3.68369	0.872	0.9516	0.52397-1.72825	0.00507	0.94092	0.445	17.5577	17	0.41725	17.5514	16	0.35081	3.05487e-91	0.074366
ebi-a-GCST90001797	18	0.726	0.91209	0.54981-1.5131	0.763	0.92915	0.57621-1.49826	0.538	1.13192	0.76303-1.67915	0.797	0.89388	0.38526-2.07400	0.729	0.92602	0.60331-1.42134	0.08606	0.21338	0.206	22.8371	17	0.15463	20.6677	16	0.19164	3.68325e-88	0.076774
ebi-a-GCST90001544	13	0.972	1.01	0.58503-1.7437	0.642	1.15316	0.63285-2.10124	0.538	1.12238	0.77722-1.62082	0.467	1.48762	0.52755-4.19488	0.261	1.7263	0.69697-4.27583	0.04823	0.60924	0.305	12.4878	12	0.40734	12.1812	11	0.35018	4.95117e-70	0.0690989
ebi-a-GCST90001779	22	0.198	0.86826	0.70520-1.0690	0.586	0.93341	0.72821-1.19642	0.538	0.94464	0.78800-1.13241	0.664	0.89489	0.54565-1.46764	0.32	0.89489	0.72272-1.10807	0.0973	0.14699	0.428	22.0699	21	0.39549	19.7935	20	0.47091	3.61852e-178	0.058631
ebi-a-GCST90001511	21	0.192	1.31487	0.88416-1.9554	0.433	1.18011	0.78035-1.78466	0.54	1.0967	0.81633-1.47335	0.759	1.1163	0.55724-2.23624	0.309	1.21496	0.84296-1.75113	-0.0986	0.20361	0.43	20.6192	20	0.41984	18.8855	19	0.4642	6.24346e-142	0.0729328
ebi-a-GCST90001676	7	0.735	1.534	0.14791-15.9095	0.876	1.09444	0.35279-3.39519	0.543	1.36875	0.49787-3.76297	0.895	1.11809	0.22725-5.50102	0.913	1.08196	0.27831-4.20634	-0.02017	0.91789	0.158	9.82908	6	0.13204	9.80603	5	0.08092	3.93843e-35	0.148213
ebi-a-GCST90001395	19	0.999	0.9998	0.62809-1.5915	0.401	0.82481	0.52613-1.29306	0.544	0.89082	0.61315-1.29423	0.66	0.80597	0.31342-2.07258	0.32	0.80597	0.53326-1.21815	-0.06311	0.41763	0.16	26.0337	18	0.09899	25.018	17	0.09431	1.74122e-93	0.0690272
ebi-a-GCST90001571	22	0.448	1.25382	0.70676-2.2243	0.618	1.12835	0.70209-1.81340	0.546	0.88438	0.59368-1.31742	0.879	1.07001	0.45262-2.52958	0.595	1.13576	0.71537-1.80320	-0.13628	0.12343	0.076	33.3426	21	0.04255	29.5239	20	0.07794	1.84101e-125	0.0798035
ebi-a-GCST90001711	18	0.384	1.14005	0.85563-1.5190	0.231	1.19313	0.89365-1.59297	0.547	1.07012	0.85839-1.33408	0.694	1.11677	0.65003-1.91864	0.225	1.18779	0.90868-1.55261	-0.04937	0.50914	0.674	14.1855	17	0.65393	13.7295	16	0.61886	0	0.0886235
ebi-a-GCST90002117	20	0.97	0.99043	0.60179-1.6300	0.714	0.92605	0.61425-1.39613	0.549	0.91658	0.68946-1.21851	0.919	0.96856	0.52646-1.78193	0.765	0.93014	0.58263-1.48492	-0.02865	0.71241	0.506	18.7406	19	0.47359	18.5957	18	0.4171	6.93939e-228	0.0787102
ebi-a-GCST90002091	17	0.773	0.95424	0.69763-1.3052	0.947	1.00773	0.80159-1.26689	0.551	1.0686	0.85932-1.32885	0.893	0.96786	0.60457-1.54947	0.943	1.00814	0.81120-1.25290	0.07805	0.33928	0.216	22.4525	16	0.12917	21.0832	15	0.13419	4.1232e-172	0.074558
ebi-a-GCST90001560	23	0.726	0.9742	0.84312-1.1257	0.69	0.96328	0.80156-1.15761	0.552	0.96065	0.84173-1.09637	0.989	1.00251	0.70449-1.42662	0.623	0.96337	0.83191-1.11561	-0.02614	0.64352	0.968	10.4925	22	0.98126	10.272	21	0.97516	1.74171e-125	0.053377
ebi-a-GCST90002016	17	0.339	1.31842	0.76184-2.2816	0.438	1.19765	0.75897-1.88989	0.556	1.11706	0.77302-1.61423	0.776	1.10618	0.55823-2.19197	0.247	1.25805	0.86485-1.83002	-0.06636	0.43257	0.106	24.3106	16	0.08294	23.3003	15	0.07797	2.88912e-151	0.0918388
ebi-a-GCST90001462	15	0.162	1.18941	0.94571-1.4959	0.402	1.11311	0.86648-1.42995	0.556	1.06595	0.86175-1.31852	0.904	0.96777	0.57277-1.63516	0.443	1.10246	0.86554-1.40424	-0.14134	0.09073	0.299	17.4783	14	0.23159	13.9071	13	0.38042	4.00647e-254	0.0675465
ebi-a-GCST90001474	19	0.125	1.35068	0.93766-1.9456	0.372	1.18344	0.81754-1.71311	0.558	1.08287	0.82973-1.41322	0.836	0.92299	0.43636-1.95232	0.295	1.20859	0.85685-1.70473	-0.09967	0.10079	0.719	14.8287	18	0.67369	11.8176	17	0.81105	2.28198e-204	0.0731001
ebi-a-GCST90001698	571	0.582	0.99996	0.99982-1.0001	0.651	0.99996	0.99977-1.00014	0.56	0.99997	0.99987-1.00007	0.249	0.99979	0.99942-1.00015	0.768	0.99998	0.99982-1.00013	0.0049	0.86172	0.835	537.179	570	0.83436	537.148	569	0.82704	NA	0.0500001
ebi-a-GCST90002029	17	0.776	1.12078	0.51856-2.4224	0.699	1.11808	0.63448-1.97028	0.563	1.12568	0.75365-1.68137	0.888	1.06493	0.45042-2.51779	0.708	1.12391	0.61612-2.05021	0.00121	0.98971	0.545	15.7483	16	0.47066	15.7481	15	0.39899	3.12049e-92	0.0804054
ebi-a-GCST90001973	16	0.374	1.23486	0.78731-1.9368	0.932	1.01782	0.67871-1.52634	0.564	1.10942	0.77946-1.57906	0.982	1.0071	0.54898-1.84752	0.685	1.08056	0.74821-1.56054	-0.06285	0.45451	0.32	19.4782	15	0.19288	18.6882	14	0.17721	5.77605e-84	0.0698968
ebi-a-GCST90001681	21	0.325	0.71686	0.37580-1.3674	0.65	1.13526	0.65634-1.96363	0.565	1.1142	0.77082-1.61056	0.733	1.19251	0.44064-3.22725	0.761	1.12119	0.54193-2.31961	0.12688	0.11964	0.523	18.224	20	0.57266	15.5682	19	0.68587	3.18879e-116	0.0790967
ebi-a-GCST90001901	18	0.447	1.07912	0.89108-1.3068	0.97	0.99567	0.79265-1.25068	0.567	1.05077	0.88686-1.24499	0.711	1.09119	0.69285-1.71856	0.818	1.02198	0.85151-1.22658	-0.0345	0.56234	0.566	16.4192	17	0.49434	16.0677	16	0.44825	1.00477e-106	0.0560786
ebi-a-GCST90001705	20	0.882	1.026	0.73397-1.4342	0.497	1.10197	0.83282-1.45810	0.567	1.07644	0.83642-1.38533	0.641	0.86375	0.47167-1.58175	0.424	1.12443	0.84852-1.49007	0.03004	0.66529	0.274	23.7411	19	0.20627	23.4887	18	0.1725	0	0.10262
ebi-a-GCST90001618	28	0.183	1.29755	0.89356-1.8842	0.859	1.03353	0.71855-1.48657	0.568	0.92963	0.72357-1.19438	0.884	1.04733	0.56668-1.93567	0.564	1.12287	0.76108-1.65664	-0.13608	0.02576	0.694	22.4428	27	0.71455	16.8484	26	0.91359	8.42886e-220	0.0670228
ebi-a-GCST90001530	15	0.983	0.99196	0.47399-2.0760	0.47	1.16819	0.76652-1.78036	0.569	1.09667	0.79816-1.50683	0.841	1.07511	0.53568-2.15777	0.382	1.21077	0.79956-1.83346	0.03161	0.77261	0.745	10.9099	14	0.6931	10.8228	13	0.62566	3.59269e-146	0.0891851
ebi-a-GCST90001709	19	0.866	1.02227	0.79501-1.3145	0.827	1.03023	0.78840-1.34623	0.57	1.05831	0.87014-1.28717	0.671	0.89567	0.54345-1.47617	0.693	1.05528	0.81119-1.37282	0.02749	0.67222	0.829	12.2447	18	0.83435	12.0594	17	0.79653	0	0.080539
ebi-a-GCST90002023	11	0.64	0.66588	0.12816-3.4596	0.768	0.90331	0.45994-1.77406	0.572	1.14844	0.71068-1.85585	0.813	0.88292	0.32389-2.40679	0.735	0.86272	0.37506-1.98443	0.11832	0.515	0.541	9.03815	10	0.52849	8.57887	9	0.47702	3.07017e-73	0.0841115
ebi-a-GCST90001518	23	0.649	0.96732	0.84005-1.1139	0.805	0.98001	0.83502-1.15017	0.573	0.96617	0.85731-1.08885	0.265	0.8846	0.71684-1.09162	0.905	0.99146	0.86252-1.13966	-0.00173	0.97528	0.956	12.488	22	0.94647	12.487	21	0.92553	1.52884e-153	0.054901
ebi-a-GCST90001477	20	0.132	1.39209	0.92346-2.0985	0.438	1.1755	0.78108-1.76907	0.575	1.08831	0.80972-1.46276	0.691	1.14534	0.59193-2.21617	0.369	1.24573	0.78009-1.98930	-0.1216	0.10727	0.945	9.91185	19	0.95509	7.03821	18	0.9898	1.26584e-112	0.0648062
ebi-a-GCST90002086	19	0.752	1.12091	0.55852-2.2496	0.641	1.1504	0.63828-2.07341	0.576	1.12964	0.73688-1.73174	0.35	1.73587	0.56327-5.34959	0.548	1.201	0.66851-2.15767	0.00227	0.9779	0.22	23.4147	18	0.17515	23.4136	17	0.13626	1.13156e-96	0.0825729
ebi-a-GCST90001948	21	0.744	1.05247	0.77767-1.4244	0.658	1.05467	0.83300-1.33534	0.576	1.05502	0.87435-1.27303	0.704	0.89425	0.50667-1.57831	0.664	1.05066	0.84321-1.30915	0.00132	0.98422	0.929	12.0953	20	0.91276	12.0949	19	0.88153	0	0.0837666
ebi-a-GCST90001606	14	0.872	0.93699	0.43157-2.0343	0.683	0.87136	0.44998-1.68735	0.578	0.87235	0.53918-1.41139	0.676	0.79506	0.27772-2.27613	0.597	0.77476	0.30762-1.95129	-0.02064	0.82159	0.73	10.074	13	0.68787	10.0209	12	0.61413	6.68679e-68	0.0688921
ebi-a-GCST90001500	24	0.248	0.79431	0.54287-1.1622	0.497	0.87555	0.59656-1.28503	0.579	0.92577	0.70515-1.21542	0.144	1.62502	0.86678-3.04654	0.36	0.84168	0.58621-1.20847	0.06713	0.27128	0.51	22.5028	23	0.49009	21.2294	22	0.5066	7.3778e-154	0.0644547
ebi-a-GCST90001991	19	0.994	0.99806	0.59024-1.6877	0.698	0.92612	0.62877-1.36409	0.58	0.9197	0.68400-1.23663	0.455	1.31352	0.65264-2.64366	0.678	0.91931	0.62186-1.35904	-0.0312	0.71642	0.975	8.8261	18	0.96364	8.68968	17	0.9495	1.1982e-230	0.0727008
ebi-a-GCST90001946	18	0.89	0.97932	0.73139-1.3113	0.644	1.05452	0.84205-1.32061	0.58	1.05476	0.87326-1.27398	0.708	0.89532	0.50701-1.58104	0.713	1.04533	0.82890-1.31827	0.04343	0.52277	0.638	15.9476	17	0.52755	15.5207	16	0.48688	0	0.0807209
ebi-a-GCST90001458	18	0.553	0.90246	0.64778-1.2573	0.702	0.93015	0.64170-1.34824	0.584	0.9322	0.72502-1.19859	0.997	0.99864	0.53813-1.85324	0.567	0.91009	0.66340-1.24851	0.02079	0.77089	0.591	16.2705	17	0.50474	16.1818	16	0.44035	9.90491e-226	0.0668374
ebi-a-GCST90002012	19	0.658	1.10264	0.72110-1.6861	0.811	1.05048	0.70109-1.57398	0.586	1.0859	0.80746-1.46036	0.714	0.88024	0.44976-1.72277	0.82	1.04316	0.72844-1.49387	-0.00591	0.92106	0.605	17.7333	18	0.47335	17.7228	17	0.40653	8.88295e-114	0.0642285
ebi-a-GCST90001488	16	0.575	1.1625	0.69545-1.9432	0.73	0.91561	0.55508-1.51032	0.586	1.09991	0.78084-1.54937	0.51	1.32596	0.58446-3.00822	0.785	1.08828	0.59988-1.97431	-0.02182	0.77531	0.451	15.0146	15	0.45037	14.9243	14	0.38335	2.68798e-82	0.0647874
ebi-a-GCST90002048	14	0.763	0.91787	0.53259-1.5819	0.444	0.83779	0.53228-1.31867	0.589	0.90852	0.64170-1.28627	0.605	1.20294	0.60704-2.38380	0.562	0.86561	0.53795-1.39286	-0.00467	0.96255	0.961	6.11208	13	0.94198	6.10978	12	0.91045	2.2707e-75	0.0741942
ebi-a-GCST90001890	11	0.87	0.92259	0.36023-2.3629	0.371	0.76222	0.42046-1.38178	0.591	0.87574	0.54011-1.41996	0.498	0.7116	0.27565-1.83700	0.593	0.82322	0.41230-1.64370	-0.01631	0.90008	0.256	13.1381	10	0.21605	13.1138	9	0.15752	3.07109e-108	0.0842933
ebi-a-GCST90001640	5	0.857	1.39968	0.04889-40.0690	0.527	1.4543	0.45633-4.63475	0.592	1.29959	0.49815-3.39040	0.586	1.55748	0.35938-6.74983	0.576	1.53204	0.38801-6.04925	-0.01266	0.96676	0.918	0.99605	4	0.91039	0.994	3	0.8027	2.86211e-24	0.0866292
ebi-a-GCST90001432	21	0.755	0.88982	0.43208-1.8325	0.818	0.92884	0.49555-1.74099	0.596	0.89135	0.58232-1.36438	0.864	1.09171	0.40587-2.93648	0.91	0.965	0.52400-1.77714	0.00047	0.9954	0.358	22.5108	20	0.31345	22.5108	19	0.25958	7.83808e-120	0.0736342
ebi-a-GCST90001955	17	0.361	1.17437	0.84033-1.6412	0.443	1.09283	0.87108-1.37101	0.597	1.05678	0.86099-1.29710	0.954	1.01637	0.58799-1.75686	0.38	1.10632	0.88823-1.37796	-0.06338	0.44345	0.446	18.2365	16	0.31023	17.513	15	0.28913	0	0.0796262
ebi-a-GCST90001448	15	0.528	0.76738	0.34495-1.7071	0.544	1.19434	0.67285-2.12001	0.597	1.12574	0.72537-1.74712	0.652	1.20581	0.54439-2.67081	0.776	1.11223	0.54189-2.28286	0.12547	0.28113	0.997	3.90722	14	0.996	2.6427	13	0.99895	8.21926e-74	0.0735351
ebi-a-GCST90001909	8	0.86	0.87858	0.22043-3.5018	0.693	1.19851	0.48748-2.94665	0.599	1.2049	0.60137-2.41412	0.852	1.11652	0.36511-3.41429	0.843	1.11652	0.39133-3.18555	0.06569	0.62309	0.815	4.02726	7	0.77663	3.75909	6	0.70924	3.27775e-42	0.0856049
ebi-a-GCST90001996	30	0.47	0.89125	0.65478-1.2131	0.52	0.9035	0.66329-1.23070	0.599	1.05884	0.85551-1.31049	0.895	0.96173	0.54186-1.70695	0.477	0.90111	0.67870-1.19641	0.09023	0.14062	0.617	24.9814	29	0.67921	22.6819	28	0.74879	1.16536e-241	0.0628495
ebi-a-GCST90001539	22	0.419	0.69886	0.29826-1.6375	0.902	0.9644	0.54012-1.72197	0.602	1.11797	0.73536-1.69964	0.951	1.03829	0.31924-3.37695	0.62	0.794	0.32342-1.94929	0.09511	0.22854	0.665	17.0434	21	0.70847	15.5004	20	0.74709	5.87704e-112	0.0776744
ebi-a-GCST90001710	20	0.611	1.08876	0.78893-1.5025	0.354	1.15483	0.85162-1.56598	0.607	1.06714	0.83278-1.36745	0.75	0.89508	0.45664-1.75447	0.282	1.18655	0.87667-1.60597	-0.01234	0.85053	0.599	17.0318	19	0.58771	16.9952	18	0.52343	0	0.0857136
ebi-a-GCST90001864	21	0.253	0.73817	0.44557-1.2229	0.511	0.87344	0.58318-1.30817	0.613	0.92969	0.70095-1.23308	0.762	0.8964	0.44581-1.80242	0.427	0.85112	0.57626-1.25707	0.08394	0.29342	0.578	18.8275	20	0.53306	17.6599	19	0.54526	1.96554e-276	0.0739509
ebi-a-GCST90001730	20	0.908	0.98113	0.71442-1.3474	0.858	0.96607	0.66139-1.41110	0.616	1.06629	0.82989-1.37004	0.934	0.96998	0.47643-1.97480	0.767	0.94975	0.67849-1.32946	0.05409	0.41247	0.642	15.531	19	0.6883	14.8271	18	0.6738	2.27167e-109	0.0579815
ebi-a-GCST90002047	15	0.751	1.22482	0.35938-4.1744	0.899	1.034	0.61552-1.73701	0.617	1.10344	0.74996-1.62353	0.529	1.37989	0.51927-3.66684	0.931	0.95287	0.32797-2.76844	-0.03069	0.86264	0.278	16.3187	14	0.2943	16.2797	13	0.23435	4.80132e-83	0.0890489
ebi-a-GCST90002049	16	0.993	1.00319	0.50525-1.9919	0.787	0.93565	0.57694-1.51741	0.621	0.9164	0.64863-1.29472	0.975	1.01128	0.50111-2.04086	0.965	0.9867	0.54715-1.77935	-0.03554	0.76905	0.898	9.52532	15	0.84849	9.43569	14	0.80217	1.48892e-84	0.0710882
ebi-a-GCST90001612	15	0.596	1.13491	0.71931-1.7906	0.984	1.00476	0.63972-1.57811	0.621	0.91567	0.64545-1.29902	0.706	1.20895	0.46000-3.17731	0.848	1.04391	0.67783-1.60771	-0.11525	0.1782	0.508	14.1999	14	0.43493	12.174	13	0.51343	2.1662e-90	0.0608076
ebi-a-GCST90001950	17	0.25	1.27588	0.85638-1.9009	0.419	1.12609	0.84411-1.50227	0.627	1.05429	0.85200-1.30461	0.661	1.11946	0.68226-1.83681	0.405	1.14149	0.84302-1.54563	-0.09194	0.28467	0.985	7.27335	16	0.96763	6.04226	15	0.97903	4.68475e-196	0.070127
ebi-a-GCST90001523	22	0.498	1.08392	0.86218-1.3627	0.856	0.97714	0.76086-1.25490	0.628	1.04603	0.87200-1.25478	0.342	1.21315	0.82155-1.79139	0.946	1.00907	0.77866-1.30765	-0.02918	0.62091	0.873	14.1568	21	0.86277	13.9044	20	0.83531	3.42168e-129	0.0579159
ebi-a-GCST90001631	24	0.166	1.64169	0.83380-3.2324	0.51	1.21076	0.68550-2.13849	0.63	1.10546	0.73531-1.66195	0.915	1.05785	0.38054-2.94068	0.702	1.1469	0.57325-2.29460	-0.10271	0.17082	0.28	26.8479	23	0.26249	24.6058	22	0.31629	1.02931e-140	0.0757275
ebi-a-GCST90001719	17	0.619	1.0813	0.79996-1.4616	0.278	1.16065	0.88694-1.51881	0.63	1.05656	0.84463-1.32167	0.899	0.96303	0.54381-1.70543	0.329	1.16299	0.86695-1.56013	-0.01616	0.82508	0.908	8.02802	16	0.94803	7.97743	15	0.92468	0	0.0779773
ebi-a-GCST90001723	25	0.6	0.89272	0.58758-1.3563	0.643	1.10678	0.72055-1.70005	0.63	1.0782	0.79362-1.46481	0.473	0.77825	0.39651-1.52752	0.69	1.08276	0.73588-1.59316	0.07702	0.21313	0.354	27.3454	24	0.28861	25.5257	23	0.32376	2.64109e-142	0.0642438
ebi-a-GCST90002009	23	0.553	0.89608	0.62744-1.2797	0.843	0.96597	0.68536-1.36146	0.63	0.9424	0.74016-1.19990	0.72	1.1189	0.61022-2.05160	0.703	0.93734	0.67505-1.30154	0.02838	0.70513	0.473	22.5999	22	0.42461	22.4427	21	0.3744	1.79595e-194	0.0601427
ebi-a-GCST90001795	21	0.857	1.05479	0.59491-1.8701	0.757	0.91972	0.54086-1.56395	0.632	0.91296	0.62917-1.32476	0.497	0.71968	0.28336-1.82785	0.545	0.8259	0.44910-1.51884	-0.04685	0.52323	0.627	17.7477	20	0.60403	17.3247	19	0.56788	2.52905e-113	0.0642895
ebi-a-GCST90001650	17	0.332	1.34447	0.75399-2.3974	0.255	1.34372	0.80796-2.23476	0.632	0.90817	0.61242-1.34674	0.097	0.29356	0.07506-1.14802	0.238	1.37108	0.82812-2.27002	-0.12565	0.10336	0.271	18.1641	16	0.31437	15.1302	15	0.44208	4.92675e-245	0.0817516
ebi-a-GCST90001585	18	0.945	1.02492	0.51764-2.0293	0.246	1.35637	0.81024-2.27062	0.633	1.10034	0.74336-1.62876	0.872	1.0939	0.37416-3.19811	0.27	1.38401	0.79197-2.41863	0.0268	0.8058	0.488	16.3498	17	0.49918	16.2862	16	0.43317	1.91072e-249	0.0882579
ebi-a-GCST90001852	16	0.496	0.79024	0.40825-1.5297	0.434	0.8159	0.48999-1.35860	0.635	0.91288	0.62687-1.32938	0.152	0.55454	0.25764-1.19356	0.301	0.75019	0.44323-1.26974	0.05101	0.61073	0.676	12.8449	15	0.61428	12.5738	14	0.56033	3.03864e-110	0.0685004
ebi-a-GCST90001846	12	0.799	0.85544	0.26524-2.7590	0.397	0.78362	0.44578-1.37750	0.635	0.88411	0.53189-1.46957	0.43	0.64455	0.22566-1.84104	0.421	0.79167	0.45790-1.36873	0.00982	0.95181	0.194	16.2061	11	0.13365	16.1999	10	0.09405	4.60505e-119	0.0826284
ebi-a-GCST90001503	25	0.933	0.99353	0.85507-1.1544	0.84	1.02271	0.82296-1.27093	0.638	1.03174	0.90577-1.17523	0.221	1.21929	0.89524-1.66062	0.577	1.06008	0.86601-1.29763	0.04988	0.33183	0.535	21.7239	24	0.59574	20.7411	23	0.5969	2.54199e-189	0.0531353
ebi-a-GCST90001699	27	0.724	1.00199	0.99110-1.0130	0.9	1.00093	0.98647-1.01561	0.638	1.00231	0.99273-1.01198	0.217	1.01591	0.99135-1.04108	0.659	1.00275	0.99075-1.01488	0.00689	0.90646	0.601	24.0205	26	0.5748	24.0064	25	0.51901	4.00514e-152	0.0500138
ebi-a-GCST90001820	20	0.196	1.45365	0.84172-2.5105	0.51	1.17498	0.72699-1.89902	0.639	1.0856	0.76995-1.53066	0.618	1.19904	0.59381-2.42117	0.399	1.2531	0.75041-2.09254	-0.10178	0.19475	0.948	10.0397	19	0.95196	8.22583	18	0.97508	5.89729e-121	0.0645658
ebi-a-GCST90001610	19	0.962	0.97462	0.33991-2.7945	0.641	0.83794	0.39863-1.76142	0.64	0.88782	0.53961-1.46074	0.851	0.8864	0.25727-3.05398	0.864	0.91325	0.32737-2.54768	-0.01769	0.8462	0.692	15.0379	18	0.65936	14.9991	17	0.59554	8.97098e-110	0.0730498
ebi-a-GCST90001851	28	0.33	1.20931	0.83120-1.7594	0.727	1.07006	0.73211-1.56400	0.64	1.06023	0.82993-1.35444	0.467	0.78667	0.41604-1.48748	0.977	0.99428	0.67502-1.46453	-0.05225	0.37206	0.628	24.3259	27	0.61218	23.5009	26	0.60448	1.10058e-227	0.0650909
ebi-a-GCST90001980	21	0.701	1.0791	0.73546-1.5833	0.637	1.07701	0.79115-1.46615	0.64	1.05772	0.83587-1.33846	0.962	1.01207	0.62431-1.64068	0.805	1.03581	0.78595-1.36511	-0.01002	0.89825	0.99	8.87031	20	0.98436	8.85352	19	0.97583	2.5376e-291	0.0641022
ebi-a-GCST90001906	18	0.549	1.28191	0.57930-2.8367	0.431	1.25896	0.70997-2.23246	0.641	0.89617	0.56541-1.42042	0.618	1.32591	0.44644-3.93790	0.33	1.46384	0.69463-3.08486	-0.10395	0.29549	0.177	22.7301	17	0.15825	21.1816	16	0.17164	4.95197e-99	0.0726289
ebi-a-GCST90001591	17	0.37	1.37786	0.69825-2.7189	0.854	1.05784	0.58039-1.92806	0.641	1.10729	0.72135-1.69971	0.685	1.19171	0.51845-2.73927	0.767	1.09819	0.59802-2.01670	-0.06891	0.42939	0.755	12.9471	16	0.67662	12.2875	15	0.65715	1.20576e-82	0.0661093
ebi-a-GCST90001825	18	0.278	0.80708	0.55526-1.1731	0.294	0.82789	0.58198-1.17770	0.641	0.93357	0.69902-1.24683	0.944	1.03679	0.38236-2.81133	0.296	0.82911	0.58994-1.16524	0.08104	0.25367	0.287	21.2871	17	0.21371	19.572	16	0.24012	4.57634e-109	0.0580347
ebi-a-GCST90001882	15	0.981	1.0033	0.76886-1.3092	0.983	0.99754	0.79495-1.25177	0.643	1.04116	0.87768-1.23508	0.601	1.13257	0.71786-1.78687	0.942	1.00851	0.80661-1.26095	0.02416	0.72783	0.6	12.8493	14	0.53842	12.7228	13	0.46944	2.16384e-100	0.0570705
ebi-a-GCST90001570	25	0.888	1.02982	0.68628-1.5453	0.735	1.06584	0.73699-1.54142	0.646	1.06905	0.80388-1.42168	0.775	0.91569	0.50328-1.66604	0.686	1.07738	0.75387-1.53973	0.01561	0.79812	0.276	29.141	24	0.21487	29.0564	23	0.17845	3.8133e-161	0.0630864
ebi-a-GCST90001447	18	0.752	1.12803	0.54107-2.3517	0.573	1.18008	0.66346-2.09900	0.647	1.11596	0.69745-1.78558	0.118	0.42056	0.14999-1.17917	0.645	1.14286	0.65462-1.99523	-0.00463	0.97002	0.124	25.7019	17	0.08007	25.6995	16	0.05841	1.5101e-90	0.0708483
ebi-a-GCST90002019	24	0.611	0.92566	0.69017-1.2415	0.144	0.78923	0.57466-1.08391	0.65	0.95418	0.77915-1.16853	0.436	0.77935	0.42062-1.44402	0.27	0.82538	0.59181-1.15114	0.01759	0.7821	0.504	21.6542	23	0.5412	21.5758	22	0.48544	2.04041e-140	0.0596031
ebi-a-GCST90001816	21	0.304	1.316	0.79051-2.1908	0.568	1.17538	0.67522-2.04603	0.651	1.08205	0.76897-1.52259	0.738	1.18629	0.44149-3.18762	0.519	1.21426	0.68034-2.16719	-0.06444	0.32325	0.561	18.6111	20	0.54722	17.5827	19	0.55046	2.55412e-136	0.0650155
ebi-a-GCST90001904	19	0.606	1.15979	0.66731-2.0157	0.382	1.24462	0.76193-2.03311	0.652	0.92478	0.65834-1.29906	0.489	1.36626	0.57482-3.24738	0.391	1.32591	0.70664-2.48787	-0.07447	0.32291	0.734	13.9659	18	0.73131	12.9294	17	0.7409	2.30675e-101	0.0618918
ebi-a-GCST90001987	23	0.557	0.9583	0.83322-1.1022	0.927	0.99212	0.83724-1.17565	0.653	0.97196	0.85862-1.10026	0.823	1.03677	0.75817-1.41775	0.78	0.9815	0.86220-1.11729	0.02296	0.64931	0.502	22.234	22	0.446	22.011	21	0.39888	1.58885e-195	0.0524066
ebi-a-GCST90001663	26	0.094	0.64583	0.39488-1.0563	0.869	0.96253	0.61130-1.51556	0.654	0.92767	0.66811-1.28807	0.587	1.25395	0.55956-2.81006	0.554	0.83801	0.47056-1.49237	0.12456	0.07374	0.248	29.2622	25	0.2531	25.5411	24	0.37685	8.68958e-143	0.0629904
ebi-a-GCST90001510	18	0.399	1.1264	0.86063-1.4742	0.543	1.08781	0.82945-1.42663	0.657	1.0455	0.85924-1.27214	0.96	1.00906	0.71510-1.42385	0.761	1.04589	0.78716-1.38967	-0.07566	0.43936	0.784	12.1342	17	0.79194	11.5053	16	0.77728	1.20624e-118	0.0542907
ebi-a-GCST90002090	22	0.641	0.79374	0.30517-2.0645	0.469	1.22418	0.70780-2.11729	0.659	1.09238	0.73773-1.61754	0.568	1.313	0.52263-3.29864	0.464	1.313	0.64163-2.68683	0.07067	0.48094	0.934	12.2707	21	0.93202	11.7549	20	0.92425	1.36705e-161	0.0773412
ebi-a-GCST90001489	24	0.365	0.85316	0.60918-1.1949	0.768	0.96021	0.73325-1.25743	0.66	0.95229	0.76609-1.18375	0.63	1.16682	0.62768-2.16903	0.777	0.96146	0.73480-1.25805	0.04744	0.41112	0.876	16.6713	23	0.82506	15.9693	22	0.81741	0	0.0670542
ebi-a-GCST90001832	13	0.601	0.88655	0.57187-1.3744	0.943	1.01556	0.66557-1.54960	0.662	1.07394	0.78012-1.47844	0.705	1.13628	0.59507-2.16971	0.916	1.02202	0.68756-1.51920	0.08782	0.23635	0.637	10.7705	12	0.54868	9.20172	11	0.60328	1.77073e-93	0.0606338
ebi-a-GCST90001936	21	0.62	0.93975	0.73814-1.1964	0.51	0.9044	0.67072-1.21950	0.662	0.95531	0.77822-1.17270	0.152	0.683	0.41372-1.12755	0.513	0.92329	0.73021-1.16742	0.01292	0.80352	0.953	10.6524	20	0.95474	10.5887	19	0.9369	5.04337e-105	0.0536687
ebi-a-GCST90001461	15	0.33	0.68578	0.33053-1.4229	0.331	0.75252	0.42423-1.33488	0.664	0.91037	0.59606-1.39041	0.95	0.96633	0.33737-2.76784	0.511	0.79997	0.41814-1.53049	0.08344	0.36729	0.642	12.0918	14	0.59893	11.2193	13	0.59245	3.08735e-173	0.0736736
ebi-a-GCST90001833	22	0.472	0.74203	0.33393-1.6489	0.888	1.04069	0.59866-1.80909	0.665	1.0953	0.72581-1.65288	0.848	1.09498	0.43827-2.73571	0.96	1.01555	0.56027-1.84079	0.09518	0.27887	0.21	26.8777	21	0.17494	25.3099	20	0.18983	4.54239e-129	0.0740129
ebi-a-GCST90001587	21	0.259	1.69796	0.69621-4.1410	0.713	1.1309	0.58705-2.17858	0.666	0.90001	0.55749-1.45296	0.956	0.97056	0.33796-2.78729	0.493	1.31165	0.61209-2.81072	-0.13803	0.11967	0.324	22.1325	20	0.33337	19.4186	19	0.43029	1.83858e-169	0.0774104
ebi-a-GCST90001982	23	0.881	1.02017	0.78781-1.3211	0.387	1.13676	0.85032-1.51968	0.669	1.04684	0.84867-1.29129	0.755	1.07674	0.68092-1.70265	0.586	1.08758	0.80754-1.46474	0.02213	0.74079	0.905	13.1781	22	0.92808	13.0657	21	0.9063	4.73534e-118	0.054291
ebi-a-GCST90001815	14	0.8	0.96095	0.71077-1.2992	0.72	0.94323	0.68515-1.29851	0.67	0.94682	0.73668-1.21690	0.606	0.84144	0.44382-1.59529	0.676	0.9406	0.71056-1.24512	-0.01494	0.86509	0.808	9.91224	13	0.70109	9.88211	12	0.6263	1.20202e-106	0.0549818
ebi-a-GCST90001460	23	0.76	1.06179	0.72594-1.5530	0.382	1.18344	0.81131-1.72626	0.67	1.06183	0.80564-1.39949	0.302	1.33191	0.78254-2.26696	0.292	1.20306	0.86015-1.68268	2e-05	0.99978	0.624	20.2681	22	0.56627	20.2681	21	0.50434	8.74606e-128	0.0586111
ebi-a-GCST90001879	20	0.408	0.82715	0.53304-1.2835	0.659	0.92054	0.63714-1.32999	0.67	1.06339	0.80133-1.41117	0.913	1.03953	0.52410-2.06187	0.61	0.90961	0.63567-1.30159	0.10602	0.16759	0.095	28.2435	19	0.07885	25.3332	18	0.11601	3.57332e-125	0.0701872
ebi-a-GCST90001548	23	0.594	0.82436	0.40928-1.6604	0.718	1.12686	0.58893-2.15613	0.675	1.09412	0.71898-1.66501	0.212	2.00503	0.69416-5.79138	0.531	1.26943	0.60924-2.64501	0.08262	0.33323	0.388	23.6747	22	0.36451	22.6181	21	0.36467	3.54913e-120	0.068941
ebi-a-GCST90001471	19	0.798	0.91815	0.48262-1.7467	0.427	1.2201	0.74676-1.99345	0.675	0.91046	0.58760-1.41072	0.437	1.42364	0.59647-3.39792	0.282	1.30825	0.81389-2.10290	-0.00366	0.97178	0.004	38.9495	18	0.00289	38.9465	17	0.00182	2.4184e-145	0.0703867
ebi-a-GCST90001608	21	0.716	0.78664	0.22008-2.8118	0.328	1.37203	0.72841-2.58435	0.678	0.89076	0.51579-1.53833	0.363	1.5929	0.59820-4.24160	0.241	1.51736	0.77188-2.98281	0.031	0.83364	0.055	32.1782	20	0.04144	32.1016	19	0.03044	1.39807e-128	0.0755583
ebi-a-GCST90001581	19	0.169	0.74867	0.50443-1.1112	0.181	0.75708	0.50373-1.13784	0.678	0.93912	0.69784-1.26381	0.893	1.05082	0.51476-2.14515	0.144	0.7329	0.49174-1.09232	0.11475	0.10607	0.675	14.4098	18	0.70202	11.4969	17	0.8296	7.59358e-105	0.056509
ebi-a-GCST90001911	20	0.811	1.07631	0.59446-1.9487	0.607	1.15543	0.66642-2.00326	0.679	0.92241	0.62911-1.35245	0.658	1.22324	0.50890-2.94029	0.564	1.19721	0.65692-2.18186	-0.05239	0.51359	0.953	10.0985	19	0.95047	9.6544	18	0.9426	1.45805e-118	0.0635345
ebi-a-GCST90001886	13	0.456	1.16241	0.79354-1.7027	0.483	1.12761	0.80638-1.57682	0.682	0.93688	0.68564-1.28018	0.907	0.96748	0.56247-1.66411	0.479	1.11559	0.83197-1.49588	-0.15579	0.11652	0.142	18.0422	12	0.11441	14.276	11	0.21809	3.10767e-106	0.0586207
ebi-a-GCST90001607	14	0.879	1.13456	0.23074-5.5787	0.19	1.62188	0.78659-3.34417	0.682	0.89052	0.51098-1.55197	0.354	2.02346	0.48138-8.50555	0.211	1.87209	0.73509-4.76772	-0.04521	0.75471	0.244	16.2107	13	0.23794	16.0738	12	0.18788	4.64659e-73	0.0649834
ebi-a-GCST90001603	16	0.306	1.766	0.61847-5.0427	0.41	1.32831	0.67563-2.61152	0.683	1.11152	0.66967-1.84490	0.919	1.06036	0.34795-3.23135	0.518	1.37581	0.53462-3.54059	-0.09523	0.34006	0.979	6.63118	15	0.96709	5.65564	14	0.97444	1.23292e-82	0.0673282
ebi-a-GCST90002042	17	0.178	2.26807	0.72901-7.0564	0.678	1.10482	0.68996-1.76914	0.684	1.07699	0.75339-1.53959	0.325	0.63237	0.26116-1.53125	0.532	1.29993	0.58167-2.90510	-0.18567	0.19547	0.907	9.33779	16	0.89885	7.50174	15	0.9422	2.20781e-98	0.0702379
ebi-a-GCST90001507	21	0.834	1.04123	0.71763-1.5107	0.901	0.97643	0.67054-1.42187	0.686	1.05346	0.81829-1.35621	0.678	1.12977	0.63994-1.99453	0.956	0.99042	0.70584-1.38971	0.00726	0.93325	0.494	19.616	20	0.48217	19.6085	19	0.41847	6.6879e-144	0.0570841
ebi-a-GCST90001828	24	0.734	0.87771	0.41771-1.8443	0.604	0.85986	0.48599-1.52134	0.687	1.08496	0.72978-1.61300	0.778	0.84894	0.27625-2.60885	0.775	0.86973	0.33812-2.23716	0.04647	0.51496	0.648	19.2737	23	0.68523	18.8357	22	0.65545	3.63442e-131	0.0655632
ebi-a-GCST90001495	21	0.742	0.94376	0.67162-1.3262	0.831	0.9735	0.76090-1.24551	0.687	1.04304	0.84960-1.28053	0.777	1.08567	0.61867-1.90521	0.951	0.99269	0.78932-1.24847	0.05696	0.47883	0.726	15.7877	20	0.7297	15.2658	19	0.70556	0	0.0650538
ebi-a-GCST90001685	14	0.671	0.62896	0.07777-5.0870	0.747	1.13151	0.53363-2.39923	0.689	1.12384	0.63472-1.98987	0.864	1.12718	0.29417-4.31900	0.943	1.04614	0.31225-3.50490	0.1022	0.58197	0.806	8.86738	13	0.78288	8.54728	12	0.74104	1.48578e-72	0.0700595
ebi-a-GCST90001938	12	0.682	1.22993	0.47054-3.2149	0.695	1.15609	0.55932-2.38958	0.689	1.11722	0.64889-1.92358	0.665	0.79007	0.28026-2.22725	0.603	1.28381	0.51457-3.20303	-0.02488	0.8169	0.979	3.56931	11	0.98087	3.5128	10	0.96666	1.07505e-60	0.0664003
ebi-a-GCST90001713	15	0.262	1.73741	0.68957-4.3775	0.636	1.16707	0.61537-2.21339	0.69	1.10292	0.68145-1.78507	0.754	1.17654	0.43318-3.19558	0.401	1.38771	0.66106-2.91310	-0.11358	0.27919	0.969	5.83542	14	0.97047	4.56015	13	0.98364	2.23075e-114	0.0699456
ebi-a-GCST90001625	24	0.95	1.02129	0.53067-1.9655	0.812	1.06765	0.62181-1.83313	0.691	0.92346	0.62395-1.36675	0.959	0.97706	0.40929-2.33241	0.69	1.13375	0.61681-2.08393	-0.02295	0.71022	0.772	17.7734	23	0.76966	17.6317	22	0.72759	1.03062e-149	0.0643932
ebi-a-GCST90001594	18	0.989	1.00519	0.49368-2.0467	0.483	1.22816	0.69162-2.18094	0.692	1.08387	0.72801-1.61366	0.729	1.17576	0.47832-2.89015	0.582	1.22316	0.60509-2.47257	0.0215	0.80527	0.751	12.7604	17	0.75207	12.6975	16	0.69473	1.52363e-108	0.0627002
ebi-a-GCST90002045	14	0.874	1.07837	0.43283-2.6867	0.401	0.78407	0.44465-1.38258	0.695	0.92116	0.61124-1.38822	0.533	0.7521	0.31449-1.79865	0.542	0.78231	0.36314-1.68531	-0.05249	0.71153	0.729	10.2651	13	0.67213	10.1217	12	0.60529	1.01349e-87	0.0686947
ebi-a-GCST90001917	21	0.654	0.97214	0.86073-1.0980	0.935	1.00647	0.86132-1.17609	0.695	0.97804	0.87524-1.09291	0.631	1.05403	0.85296-1.30250	0.925	1.00635	0.88399-1.14565	0.0129	0.81121	0.538	19.1906	20	0.50947	19.1315	19	0.44843	1.40272e-107	0.0509939
ebi-a-GCST90001506	13	0.885	0.9628	0.58309-1.5898	0.769	0.92836	0.56544-1.52423	0.697	0.93141	0.65134-1.33193	0.241	0.61791	0.28747-1.32816	0.977	0.99315	0.62644-1.57453	-0.01566	0.85675	0.564	10.5693	12	0.56614	10.5352	11	0.48299	3.32397e-79	0.056657
ebi-a-GCST90001430	25	0.798	1.04557	0.74567-1.4661	0.592	0.90001	0.61250-1.32247	0.7	0.94765	0.72059-1.24626	0.986	1.00806	0.42574-2.38687	0.706	0.93543	0.66422-1.31740	-0.04737	0.3407	0.627	21.7674	24	0.59315	20.8207	23	0.59203	2.53244e-132	0.0559354
ebi-a-GCST90001777	22	0.995	1.00068	0.81488-1.2289	0.643	1.05585	0.83881-1.32904	0.7	0.96638	0.81184-1.15033	0.488	0.8105	0.45245-1.45188	0.735	1.03784	0.83916-1.28357	-0.02974	0.53657	0.73	15.0884	21	0.81849	14.6929	20	0.7937	4.95986e-178	0.0531572
ebi-a-GCST90001702	15	0.843	1.03144	0.76347-1.3935	0.474	1.11185	0.83163-1.48650	0.701	1.04522	0.83411-1.30978	0.419	0.79057	0.45459-1.37488	0.464	1.10864	0.84749-1.45027	0.01224	0.89798	0.552	12.4975	14	0.56642	12.4803	13	0.4887	0	0.065701
ebi-a-GCST90001437	19	0.458	1.62844	0.46325-5.7244	0.955	0.98003	0.48633-1.97490	0.701	0.90299	0.53592-1.52148	0.68	1.2978	0.38344-4.39253	0.799	1.15045	0.39700-3.33385	-0.12051	0.32643	0.98	7.99098	18	0.97877	6.9699	17	0.98394	5.48776e-96	0.0650902
ebi-a-GCST90001880	17	0.664	0.94816	0.74935-1.1997	0.804	0.97413	0.79171-1.19859	0.702	1.03192	0.87862-1.21196	0.523	0.86065	0.54845-1.35057	0.738	0.96774	0.80148-1.16850	0.06025	0.34941	0.789	10.5659	16	0.83546	9.6329	15	0.84217	1.80638e-117	0.0547971
ebi-a-GCST90001908	20	0.857	0.94482	0.51329-1.7391	0.338	0.77881	0.46717-1.29833	0.702	0.93377	0.65735-1.32642	0.417	0.66145	0.24928-1.75511	0.208	0.62266	0.30555-1.26890	-0.00352	0.96361	0.495	18.0896	19	0.51646	18.0875	18	0.44991	1.32155e-111	0.0599549
ebi-a-GCST90001535	23	0.966	0.98836	0.58144-1.6801	0.044	1.66783	1.01382-2.74374	0.702	1.07419	0.74448-1.54993	0.279	1.92019	0.60655-6.07885	0.208	1.57617	0.79267-3.13410	0.02798	0.66922	0.11	29.5299	22	0.13035	29.2682	21	0.10771	7.49083e-138	0.0631921
ebi-a-GCST90002101	12	0.487	0.48682	0.06894-3.4375	0.453	0.72857	0.31889-1.66457	0.703	0.88108	0.45972-1.68861	0.703	0.74489	0.16998-3.26423	0.511	0.65409	0.19221-2.22587	0.11728	0.54229	0.803	6.84154	11	0.81177	6.44357	10	0.77672	3.32299e-62	0.0685586
ebi-a-GCST90001829	16	0.629	1.07953	0.79657-1.4630	0.461	1.11784	0.83108-1.50354	0.704	1.04496	0.83299-1.31087	0.897	0.95938	0.51712-1.77989	0.358	1.15158	0.86018-1.54170	-0.02248	0.75736	0.831	8.67232	15	0.89402	8.57305	14	0.85739	0	0.0672829
ebi-a-GCST90001405	19	0.759	1.05578	0.75080-1.4846	0.784	1.05123	0.73557-1.50235	0.707	1.05479	0.79902-1.39244	0.669	1.12462	0.66173-1.91130	0.793	1.04962	0.73500-1.49891	-0.00058	0.99273	0.993	7.11864	18	0.98909	7.11856	17	0.98196	3.73258e-94	0.0546938
ebi-a-GCST90001766	16	0.047	0.66473	0.46064-0.9592	0.518	0.88509	0.61121-1.28170	0.708	0.94128	0.68562-1.29227	0.948	1.01731	0.61084-1.69426	0.37	0.86002	0.62452-1.18433	0.20848	0.01725	0.191	21.5028	15	0.12152	14.1387	14	0.43943	1.25638e-93	0.0554754
ebi-a-GCST90001418	23	0.468	1.19684	0.74293-1.9281	0.761	0.92918	0.57884-1.49158	0.709	1.07325	0.74061-1.55531	0.904	1.05505	0.44622-2.49462	0.932	0.98238	0.65695-1.46902	-0.05228	0.4762	0.096	32.2414	22	0.07337	31.4532	21	0.06644	1.02468e-116	0.0604809
ebi-a-GCST90001807	14	0.367	1.28426	0.76102-2.1672	0.654	1.12629	0.66981-1.89388	0.709	1.0837	0.71014-1.65377	0.931	0.95009	0.30465-2.96294	0.693	1.10503	0.68066-1.79398	-0.08469	0.30647	0.398	15.3034	13	0.2888	13.9747	12	0.30233	6.06946e-71	0.0585124
ebi-a-GCST90001746	19	0.405	1.34987	0.67776-2.6885	0.692	1.13779	0.60108-2.15373	0.713	1.08238	0.71015-1.64973	0.831	0.90261	0.35717-2.28105	0.688	1.14654	0.59469-2.21047	-0.0662	0.43804	0.885	11.5275	18	0.87065	10.8968	17	0.86188	5.44792e-110	0.0623711
ebi-a-GCST90001860	22	0.227	0.7556	0.48631-1.1740	0.578	0.90888	0.64898-1.27287	0.713	0.95403	0.74237-1.22605	0.871	0.9549	0.55043-1.65660	0.68	0.93259	0.67236-1.29354	0.10868	0.22446	0.446	22.3372	21	0.38031	20.71	20	0.41437	1.48141e-283	0.0603721
ebi-a-GCST90001889	22	0.819	0.9656	0.71766-1.2992	0.822	0.96218	0.68794-1.34574	0.72	0.95878	0.76160-1.20702	0.506	0.84027	0.50773-1.39058	0.776	0.95531	0.69960-1.30447	-0.00485	0.94165	0.651	18.3722	21	0.62534	18.3667	20	0.56326	1.15636e-145	0.0548414
ebi-a-GCST90001953	17	0.423	0.85356	0.58553-1.2443	0.624	1.05791	0.84481-1.32477	0.721	1.04382	0.82493-1.32078	0.82	0.93537	0.53139-1.64647	0.669	1.04995	0.84330-1.30724	0.12753	0.20628	0.142	25.3021	16	0.06467	22.6651	15	0.09152	0	0.0678765
ebi-a-GCST90002028	19	0.88	0.94035	0.42747-2.0686	0.794	1.08183	0.59992-1.95085	0.722	0.91828	0.57386-1.46942	0.596	0.74843	0.26164-2.14093	0.897	0.94606	0.41350-2.16453	-0.00674	0.94127	0.161	24.7157	18	0.13295	24.7076	17	0.10145	2.19264e-93	0.0622389
ebi-a-GCST90001572	19	0.796	1.10758	0.51610-2.3769	0.789	1.09199	0.57348-2.07931	0.725	0.9269	0.60714-1.41506	0.862	0.90793	0.31029-2.65667	0.87	1.06871	0.48707-2.34492	-0.042	0.58735	0.519	17.8849	18	0.46326	17.5687	17	0.41652	8.87956e-103	0.0598267
ebi-a-GCST90001402	12	0.485	1.22834	0.70495-2.1403	0.846	1.05197	0.63010-1.75632	0.729	1.07105	0.72690-1.57813	0.626	1.21918	0.56152-2.64711	0.687	1.11075	0.67551-1.82641	-0.05335	0.51473	0.747	8.13752	11	0.70093	7.68134	10	0.65993	9.96633e-61	0.0552135
ebi-a-GCST90001818	13	0.266	2.53422	0.53463-12.0126	0.488	0.72458	0.29159-1.80054	0.729	0.88486	0.44283-1.76814	0.63	0.65835	0.12550-3.45351	0.588	0.61319	0.10971-3.42709	-0.18572	0.17112	0.314	13.7668	12	0.31585	11.5213	11	0.40068	3.0995e-68	0.0655275
ebi-a-GCST90001791	24	0.439	0.87097	0.61771-1.2281	0.849	0.96378	0.65936-1.40874	0.729	1.04823	0.80263-1.36897	0.88	1.04593	0.58826-1.85965	0.857	0.97118	0.70951-1.32934	0.09294	0.10738	0.837	17.1449	23	0.80208	14.3272	22	0.88946	7.95256e-185	0.0567297
ebi-a-GCST90001865	13	0.544	0.73416	0.27878-1.9334	0.514	0.8132	0.43727-1.51231	0.73	0.92574	0.59721-1.43502	0.329	1.60508	0.64538-3.99184	0.442	0.74982	0.36848-1.52582	0.05429	0.60908	0.963	5.21756	12	0.95031	4.9405	11	0.93401	1.954e-77	0.0588057
ebi-a-GCST90001822	23	0.546	0.81189	0.41707-1.5805	0.361	0.78421	0.46536-1.32152	0.735	1.07007	0.72278-1.58423	0.632	1.23909	0.52192-2.94167	0.505	0.82101	0.46425-1.45191	0.07318	0.32621	0.277	25.8993	22	0.25603	24.7102	21	0.25993	9.96572e-115	0.0594302
ebi-a-GCST90002120	16	0.439	2.10727	0.33703-13.1755	0.911	1.04186	0.50653-2.14295	0.736	1.10403	0.62078-1.96346	0.67	1.30507	0.39303-4.33355	0.748	1.19318	0.41360-3.44220	-0.14036	0.4778	0.097	22.8624	15	0.08711	22.0255	14	0.07809	4.46078e-97	0.0718135
ebi-a-GCST90001912	8	0.77	0.91537	0.51903-1.6143	0.791	0.92972	0.54213-1.59440	0.739	1.07525	0.70133-1.64852	0.877	1.08382	0.40638-2.89060	0.756	0.91577	0.53688-1.56204	0.07418	0.43029	0.739	2.80814	7	0.90217	2.09338	6	0.91091	4.40953e-38	0.0544371
ebi-a-GCST90001534	14	0.863	1.02459	0.78143-1.3434	0.914	0.98347	0.72562-1.33294	0.74	0.96163	0.76334-1.21143	0.421	0.81792	0.50912-1.31402	0.829	0.96863	0.72961-1.28596	-0.05648	0.39753	0.953	6.45069	13	0.9282	5.68097	12	0.9313	2.62979e-80	0.052116
ebi-a-GCST90001597	16	0.551	0.72724	0.26156-2.0220	0.534	1.28041	0.58808-2.78780	0.74	0.90833	0.51474-1.60285	0.233	0.426	0.11083-1.63750	0.441	1.44456	0.58118-3.59053	0.07131	0.61226	0.195	20.0235	15	0.17103	19.6464	14	0.14169	4.77473e-97	0.0637382
ebi-a-GCST90002015	17	0.291	1.37481	0.77777-2.4301	0.432	1.19671	0.76433-1.87369	0.741	1.06811	0.72303-1.57789	0.921	1.0389	0.49347-2.18721	0.284	1.25038	0.84260-1.85549	-0.09641	0.25647	0.044	27.5925	16	0.03535	25.2496	15	0.04669	2.06845e-151	0.0640019
ebi-a-GCST90001497	19	0.752	0.92441	0.57244-1.4928	0.603	1.13048	0.71173-1.79561	0.741	1.05669	0.76176-1.46581	0.896	0.9536	0.47316-1.92190	0.764	1.07617	0.67076-1.72662	0.06877	0.45956	0.413	19.8189	18	0.34311	19.173	17	0.31869	2.47818e-159	0.0586463
ebi-a-GCST90001940	11	0.359	0.49069	0.11602-2.0754	0.888	1.05926	0.47596-2.35740	0.742	1.1062	0.60661-2.01725	0.739	1.23737	0.36640-4.17872	0.687	0.80906	0.29738-2.20117	0.16412	0.25516	0.558	8.79823	10	0.55135	7.32124	9	0.60371	8.30674e-58	0.0618315
ebi-a-GCST90001492	19	0.634	1.04862	0.86529-1.2708	0.891	1.01618	0.80827-1.27758	0.743	0.97384	0.83129-1.14083	0.424	0.87058	0.62450-1.21361	0.847	1.02363	0.80995-1.29368	-0.09039	0.20812	0.428	18.2956	18	0.43634	16.5835	17	0.48291	3.94641e-119	0.0514284
ebi-a-GCST90001494	22	0.795	0.97049	0.77630-1.2133	0.699	1.06345	0.77876-1.45223	0.744	1.0319	0.85458-1.24603	0.421	1.24747	0.73531-2.11636	0.075	1.36235	0.98562-1.88307	0.05091	0.32676	0.269	22.069	21	0.39554	21.0074	20	0.39669	5.14545e-178	0.0530066
ebi-a-GCST90001977	16	0.317	1.33849	0.77193-2.3209	0.767	1.08365	0.63727-1.84270	0.744	1.06805	0.71886-1.58685	0.841	0.91568	0.39401-2.12806	0.516	0.79236	0.39940-1.57192	-0.09419	0.27154	0.269	17.8968	15	0.26813	16.3651	14	0.29159	2.50173e-81	0.0575234
ebi-a-GCST90001708	21	0.21	1.21047	0.90691-1.6156	0.357	1.14618	0.85746-1.53211	0.745	1.03582	0.83782-1.28060	0.808	0.94506	0.60327-1.48049	0.442	1.11286	0.85194-1.45368	-0.10161	0.1354	0.57	18.6534	20	0.54445	16.2216	19	0.64244	0	0.0607548
ebi-a-GCST90001780	22	0.717	0.95324	0.73869-1.2301	0.955	1.00867	0.74622-1.36343	0.747	0.96585	0.78218-1.19265	0.622	1.12184	0.71535-1.75933	0.87	1.02106	0.79746-1.30737	0.01189	0.85909	0.599	19.8346	21	0.53176	19.8022	20	0.47036	8.59573e-138	0.0526185
ebi-a-GCST90001537	21	0.725	0.9212	0.58739-1.4447	0.582	0.87944	0.55651-1.38976	0.748	0.94803	0.68423-1.31354	0.778	0.89546	0.41979-1.91014	0.489	0.85194	0.54586-1.32966	0.01262	0.85789	0.815	13.7495	20	0.84296	13.7166	19	0.79995	2.73553e-113	0.0553928
ebi-a-GCST90001593	19	0.643	1.15624	0.63248-2.1138	0.562	1.17067	0.68733-1.99392	0.749	0.94275	0.65673-1.35334	0.987	1.00758	0.42442-2.39199	0.652	1.12554	0.67936-1.86477	-0.06198	0.41892	0.565	17.243	18	0.50646	16.5568	17	0.48476	4.55432e-95	0.0552175
ebi-a-GCST90001654	27	0.806	1.08876	0.55645-2.1303	0.859	1.04933	0.61741-1.78339	0.75	0.93286	0.60847-1.43019	0.806	0.86662	0.27910-2.69093	0.89	1.03661	0.62504-1.71917	-0.04714	0.56027	0.041	43.6934	26	0.0163	43.0927	25	0.01367	5.23997e-150	0.0617555
ebi-a-GCST90001440	23	0.98	0.99428	0.63487-1.5571	0.764	0.92978	0.57862-1.49404	0.751	0.94856	0.68457-1.31435	0.711	1.14943	0.55543-2.37869	0.923	0.97821	0.63081-1.51694	-0.01762	0.76745	0.786	17.1654	22	0.75417	17.0757	21	0.70651	7.17471e-113	0.0549456
ebi-a-GCST90002013	11	0.69	1.09557	0.71002-1.6905	0.615	1.09312	0.77297-1.54588	0.751	1.05351	0.76316-1.45434	0.419	1.25289	0.74143-2.11717	0.567	1.10587	0.79260-1.54297	-0.02665	0.78379	0.312	13.5106	10	0.19651	13.3916	9	0.14567	4.49493e-97	0.055767
ebi-a-GCST90001939	15	0.634	1.23774	0.52538-2.9160	0.604	0.82907	0.40808-1.68437	0.752	1.08183	0.66459-1.76103	0.079	2.93406	0.96471-8.92369	0.651	0.83205	0.38180-1.81328	-0.03953	0.71418	0.596	12.6242	14	0.5563	12.4841	13	0.4884	1.77963e-74	0.0589807
ebi-a-GCST90001902	16	0.59	0.85832	0.49893-1.4766	0.907	0.9704	0.58767-1.60238	0.753	1.06192	0.72995-1.54488	0.794	0.88992	0.37592-2.10674	0.666	0.88992	0.52970-1.49511	0.07509	0.30711	0.393	17.1613	15	0.30931	15.8864	14	0.32036	8.28007e-105	0.058187
ebi-a-GCST90001712	15	0.841	0.96556	0.69012-1.3509	0.311	1.1577	0.87229-1.53651	0.755	1.03864	0.81869-1.31767	0.354	0.75311	0.42183-1.34456	0.497	1.10623	0.83292-1.46923	0.06602	0.54727	0.356	16.1531	14	0.30412	15.6921	13	0.26616	0	0.0612809
ebi-a-GCST90001715	12	0.895	1.02343	0.73146-1.4320	0.391	1.1389	0.84618-1.53289	0.757	1.03947	0.81311-1.32885	0.75	0.89557	0.46179-1.73680	0.412	1.13475	0.84841-1.51774	0.01421	0.89054	0.408	11.3322	11	0.41587	11.3097	10	0.33391	0	0.0613719
ebi-a-GCST90001637	27	0.914	0.95256	0.39604-2.2911	0.871	0.9538	0.53874-1.68862	0.758	0.93284	0.59947-1.45161	0.607	1.37081	0.41885-4.48641	0.98	0.98934	0.43214-2.26499	-0.00571	0.95701	0.079	37.4768	26	0.06767	37.4723	25	0.05204	3.80973e-203	0.0643057
ebi-a-GCST90001988	18	0.728	0.91033	0.54142-1.5306	0.702	0.92788	0.63247-1.36129	0.758	0.95514	0.71284-1.27980	0.551	1.21092	0.65336-2.24430	0.656	0.91842	0.63555-1.32719	0.01939	0.82917	0.983	7.3788	17	0.97809	7.3307	16	0.96635	3.50488e-236	0.0571557
ebi-a-GCST90002033	23	0.684	0.91649	0.60601-1.3860	0.709	0.91733	0.58319-1.44290	0.759	0.95656	0.72006-1.27072	0.971	1.01219	0.52553-1.94948	0.772	0.94073	0.62572-1.41432	0.01773	0.78309	0.93	13.3118	22	0.9241	13.234	21	0.90021	2.34724e-135	0.0550303
ebi-a-GCST90001855	15	0.986	0.99464	0.54301-1.8219	0.724	1.067	0.74395-1.53034	0.761	1.05891	0.73283-1.53009	0.107	1.8424	0.91984-3.69027	0.89	1.02713	0.70856-1.48893	0.02915	0.79822	0.1	23.507	14	0.0525	23.3846	13	0.03729	2.46592e-218	0.0639507
ebi-a-GCST90001997	21	0.125	0.5744	0.29199-1.1299	0.934	1.01936	0.64671-1.60672	0.761	1.05113	0.76180-1.45035	0.429	1.39473	0.62136-3.13066	0.981	0.99406	0.60839-1.62420	0.17557	0.06114	0.52	19.554	20	0.48612	15.5926	19	0.68426	2.14455e-199	0.0582121
ebi-a-GCST90002082	16	0.945	0.98512	0.64963-1.4939	0.518	1.1798	0.71437-1.94847	0.762	1.05284	0.75450-1.46916	0.345	1.46227	0.68135-3.13824	0.662	1.11754	0.68570-1.82136	0.04678	0.60104	0.493	14.6727	15	0.47524	14.3787	14	0.4219	3.85341e-83	0.0545375
ebi-a-GCST90001755	25	0.923	0.94688	0.31705-2.8279	0.783	1.08941	0.59146-2.00658	0.765	0.93054	0.58034-1.49208	0.124	0.30079	0.06854-1.32005	0.173	2.20576	0.73145-6.65171	-0.00365	0.97259	0.101	33.0469	24	0.10309	33.0451	23	0.08028	4.94177e-152	0.0619289
ebi-a-GCST90001745	27	0.465	1.30791	0.64393-2.6566	0.822	1.06884	0.59780-1.91102	0.766	0.9427	0.63897-1.39080	0.815	0.89118	0.34287-2.31629	0.619	1.17901	0.62041-2.24056	-0.08961	0.28961	0.243	31.2512	26	0.21905	29.8534	25	0.22983	3.28837e-176	0.0592038
ebi-a-GCST90001454	15	0.398	1.9004	0.45041-8.0183	0.874	0.93814	0.42553-2.06826	0.767	1.10184	0.58081-2.09029	0.984	1.01357	0.28079-3.65871	0.698	1.29731	0.35740-4.70907	-0.10402	0.42105	0.139	19.9279	14	0.13243	18.923	13	0.12551	8.41218e-73	0.0654906
ebi-a-GCST90001965	17	0.791	1.03763	0.79301-1.3577	0.844	1.02959	0.76954-1.37751	0.767	0.96643	0.77088-1.21159	0.67	1.19602	0.53364-2.68059	0.816	1.03126	0.79866-1.33158	-0.05576	0.35354	0.644	12.7605	16	0.69018	11.8439	15	0.6908	1.20765e-93	0.0522034
ebi-a-GCST90001601	16	0.298	1.41221	0.75536-2.6402	0.866	1.05286	0.57828-1.91691	0.769	1.06289	0.70765-1.59645	0.193	0.53728	0.22007-1.31172	0.768	1.09363	0.60979-1.96138	-0.08382	0.26095	0.734	12.3987	15	0.64863	11.0263	14	0.68397	1.97243e-82	0.0555047
ebi-a-GCST90001579	15	0.725	1.09943	0.65602-1.8425	0.533	1.15161	0.73865-1.79544	0.769	0.94374	0.64114-1.38918	0.919	1.04708	0.44002-2.49167	0.416	1.17656	0.80439-1.72093	-0.08633	0.39307	0.134	21.4638	14	0.09032	20.2483	13	0.08919	1.40451e-114	0.0560599
ebi-a-GCST90001769	26	0.926	0.98085	0.65366-1.4718	0.319	1.22237	0.82336-1.81473	0.771	1.04291	0.78640-1.38309	0.367	1.38847	0.68971-2.79518	0.229	1.38847	0.82365-2.34062	0.02853	0.67878	0.154	31.0969	25	0.18583	30.8708	24	0.15754	9.02337e-163	0.0548169
ebi-a-GCST90001653	25	0.732	1.09411	0.65773-1.8200	0.717	1.09575	0.66866-1.79565	0.771	0.9527	0.68730-1.32058	0.713	1.16562	0.52051-2.61025	0.673	1.11424	0.67836-1.83021	-0.04173	0.49406	0.927	14.8656	24	0.92463	14.3827	23	0.91539	3.45264e-135	0.0551796
ebi-a-GCST90001656	25	0.732	0.91399	0.54945-1.5204	0.712	0.91261	0.56183-1.48240	0.771	1.04965	0.75724-1.45497	0.724	0.85791	0.36981-1.99024	0.649	0.89747	0.56676-1.42114	0.04173	0.49406	0.927	14.8656	24	0.92463	14.3827	23	0.91539	3.45264e-135	0.0557082
ebi-a-GCST90001949	18	0.875	1.02594	0.74985-1.4037	0.661	1.05257	0.83718-1.32339	0.774	1.0286	0.84840-1.24708	0.16	1.54763	0.86447-2.77066	0.642	1.05736	0.83946-1.33183	0.00139	0.9839	0.874	11.4112	17	0.83441	11.4108	16	0.78345	0	0.0583015
ebi-a-GCST90001419	16	0.986	0.99481	0.56977-1.7369	0.889	1.04016	0.59855-1.80759	0.776	0.94447	0.63778-1.39866	0.48	1.46748	0.51954-4.14506	0.809	1.06652	0.63829-1.78205	-0.01903	0.80067	0.804	11.2945	15	0.73145	11.2283	14	0.66802	4.80127e-78	0.0540623
ebi-a-GCST90001812	17	0.453	0.74132	0.34608-1.5879	0.933	1.02519	0.57399-1.83107	0.776	0.93871	0.60730-1.45096	0.231	2.01486	0.66936-6.06499	0.688	1.17578	0.54062-2.55716	0.09417	0.4675	0.319	18.3269	16	0.3051	17.6722	15	0.28029	1.26492e-99	0.0562794
ebi-a-GCST90001701	11	0.959	1.02212	0.45132-2.3148	0.582	1.19747	0.63044-2.27452	0.777	0.93339	0.57879-1.50525	0.682	1.2352	0.46322-3.29370	0.443	1.30763	0.67680-2.52644	-0.04016	0.79446	0.496	9.00613	10	0.53152	8.93411	9	0.44338	1.24956e-85	0.0564746
ebi-a-GCST90001994	13	0.428	0.88257	0.65541-1.1885	0.511	0.89759	0.65047-1.23859	0.778	0.96604	0.75951-1.22872	0.433	0.83321	0.53594-1.29538	0.318	0.84466	0.61463-1.16078	0.07663	0.33382	0.82	7.66444	12	0.81077	6.64266	11	0.82724	9.84585e-66	0.0513038
ebi-a-GCST90001592	22	0.205	0.79181	0.55821-1.1232	0.752	0.94342	0.65689-1.35493	0.779	1.0384	0.79771-1.35172	0.38	1.4373	0.65066-3.17496	0.387	0.853	0.59962-1.21344	0.11484	0.03133	0.734	13.481	21	0.89085	8.12017	20	0.99104	2.26396e-124	0.0529992
ebi-a-GCST90001951	15	0.693	0.92434	0.63079-1.3545	0.66	1.05966	0.81869-1.37157	0.781	0.9711	0.78992-1.19384	0.973	1.00937	0.58933-1.72878	0.684	1.0541	0.82229-1.35125	0.02802	0.76827	0.674	11.3145	14	0.66117	11.224	13	0.59206	4.78944e-279	0.0563801
ebi-a-GCST90002056	21	0.9	0.95898	0.50331-1.8272	0.996	0.99883	0.61812-1.61401	0.785	1.05366	0.72414-1.53313	0.945	0.97305	0.44947-2.10653	0.653	0.88699	0.53038-1.48337	0.02936	0.72564	0.132	27.5644	20	0.12012	27.3816	19	0.09607	6.44819e-140	0.0580007
ebi-a-GCST90002051	15	0.542	1.27749	0.59339-2.7502	0.479	1.18897	0.73651-1.91938	0.785	1.04767	0.74961-1.46423	0.532	1.23382	0.64847-2.34753	0.515	1.2201	0.68016-2.18867	-0.06587	0.5827	0.932	7.44879	14	0.91603	7.13128	13	0.89526	6.85918e-83	0.0567234
ebi-a-GCST90001403	17	0.225	1.64709	0.76031-3.5682	0.536	1.23345	0.63452-2.39770	0.786	0.93967	0.59950-1.47286	0.508	1.50638	0.46078-4.92464	0.43	1.346	0.65536-2.76446	-0.13198	0.10073	0.673	13.0284	16	0.67068	9.96978	15	0.82164	6.67101e-88	0.05538
ebi-a-GCST90001441	16	0.241	1.87535	0.68485-5.1354	0.439	1.34852	0.63194-2.87763	0.786	1.07408	0.64095-1.79988	0.506	1.55601	0.43646-5.54723	0.42	1.39379	0.63529-3.05787	-0.13395	0.22727	0.807	10.7111	15	0.77279	9.1163	14	0.82353	2.50515e-78	0.0572652
ebi-a-GCST90001985	24	0.911	0.98864	0.81133-1.2047	0.847	0.97963	0.79472-1.20756	0.786	1.02175	0.87465-1.19358	0.527	1.11858	0.79478-1.57430	0.931	0.99216	0.83187-1.18333	0.03239	0.6023	0.989	8.89753	23	0.99629	8.61798	22	0.9951	0	0.0523491
ebi-a-GCST90001568	17	0.8	1.05758	0.69119-1.6182	0.778	0.93419	0.58219-1.49902	0.786	0.95584	0.68951-1.32505	0.81	1.09502	0.52960-2.26412	0.874	0.96574	0.63256-1.47440	-0.04946	0.478	0.807	11.7105	16	0.76366	11.1809	15	0.73967	1.07892e-83	0.052911
ebi-a-GCST90001464	19	0.52	0.86283	0.55562-1.3399	0.374	0.83754	0.56653-1.23821	0.787	0.95812	0.70288-1.30604	0.782	1.10315	0.55612-2.18827	0.395	0.84874	0.58704-1.22710	0.05874	0.51357	0.322	21.224	18	0.26826	20.6823	17	0.24082	4.66406e-301	0.0580492
ebi-a-GCST90001615	17	0.53	0.72841	0.27704-1.9152	0.709	0.86587	0.40590-1.84710	0.787	0.93099	0.55471-1.56253	0.915	0.93531	0.27754-3.15201	0.522	0.72924	0.28363-1.87495	0.05659	0.56451	0.682	12.8257	16	0.68546	12.4786	15	0.6425	1.41502e-84	0.0568039
ebi-a-GCST90001729	17	0.352	0.66896	0.29473-1.5184	0.755	0.90547	0.48579-1.68772	0.788	0.93398	0.56756-1.53694	0.696	0.81029	0.28754-2.28344	0.601	0.79783	0.34805-1.82883	0.10753	0.331	0.227	20.335	16	0.20551	19.053	15	0.21134	2.36068e-107	0.0578141
ebi-a-GCST90001954	17	0.857	1.02056	0.82110-1.2685	0.534	1.05614	0.88910-1.25457	0.791	1.02161	0.87216-1.19668	0.506	1.11788	0.81072-1.54141	0.52	1.05019	0.90769-1.21506	0.00114	0.98899	0.157	24.7105	16	0.07509	24.7102	15	0.05397	0	0.0544025
ebi-a-GCST90002070	26	0.475	0.90405	0.68855-1.1870	0.645	0.935	0.70250-1.24445	0.791	0.97233	0.78979-1.19706	0.519	1.18215	0.71598-1.95182	0.495	0.91505	0.71194-1.17610	0.04532	0.42503	0.67	21.3807	25	0.6712	20.7221	24	0.65506	2.75827e-147	0.0522032
ebi-a-GCST90001999	19	0.767	1.10044	0.59003-2.0524	0.102	1.51332	0.92036-2.48830	0.792	1.04506	0.75301-1.45038	0.309	1.60525	0.66164-3.89461	0.234	1.4451	0.80404-2.59728	-0.01915	0.84995	0.5	17.5911	18	0.48288	17.553	17	0.41755	7.78528e-184	0.0558951
ebi-a-GCST90001883	21	0.861	1.04666	0.63217-1.7329	0.426	1.18865	0.77701-1.81836	0.793	1.04681	0.74389-1.47309	0.532	1.2465	0.63224-2.45754	0.517	1.17134	0.73223-1.87376	7e-05	0.99937	0.199	26.202	20	0.15924	26.202	19	0.12466	3.69564e-225	0.058565
ebi-a-GCST90001963	19	0.83	1.03082	0.78439-1.3547	0.824	1.02736	0.80984-1.30330	0.794	1.02928	0.82878-1.27829	0.984	0.99442	0.57520-1.71919	0.789	1.02999	0.83259-1.27420	-0.00121	0.98542	0.284	23.8121	18	0.16128	23.8117	17	0.12464	3.64744e-146	0.0524894
ebi-a-GCST90001521	22	0.918	0.97725	0.63331-1.5080	0.805	1.05224	0.70288-1.57523	0.794	0.96426	0.73372-1.26723	0.426	1.36042	0.64728-2.85927	0.392	1.3122	0.71373-2.41250	-0.00491	0.9387	0.547	19.1117	21	0.57798	19.1056	20	0.51497	1.39235e-128	0.054758
ebi-a-GCST90001783	12	0.644	1.38599	0.36178-5.3098	0.964	1.01687	0.48789-2.11939	0.795	1.07722	0.61390-1.89022	0.998	1.00149	0.32570-3.07950	0.984	0.98942	0.36095-2.71217	-0.05034	0.69402	0.742	7.86848	11	0.72503	7.70448	10	0.65768	3.72059e-78	0.057849
ebi-a-GCST90001974	17	0.617	1.22459	0.56214-2.6677	0.52	1.24481	0.63878-2.42579	0.798	1.06511	0.65672-1.72747	0.688	0.79106	0.25735-2.43162	0.545	1.23527	0.63214-2.41383	-0.03609	0.65516	0.34	18.3482	16	0.3039	18.0977	15	0.25756	2.66795e-87	0.0572438
ebi-a-GCST90001918	16	0.262	1.30551	0.83469-2.0419	0.936	1.01807	0.65765-1.57602	0.799	1.04308	0.75429-1.44244	0.814	0.92335	0.47997-1.77631	0.544	1.12748	0.77174-1.64720	-0.12395	0.17544	0.774	11.3956	15	0.72408	9.35863	14	0.80741	6.48554e-80	0.0529387
ebi-a-GCST90002076	21	0.589	0.81441	0.39165-1.6935	0.379	0.79451	0.47598-1.32619	0.807	0.9503	0.63148-1.43006	0.686	0.86004	0.41841-1.76782	0.434	0.79536	0.45334-1.39544	0.04522	0.62117	0.111	29.2724	20	0.08253	28.8886	19	0.06776	5.12143e-130	0.0560828
ebi-a-GCST90001522	15	0.685	0.82017	0.32107-2.0951	0.529	0.85048	0.51376-1.40788	0.809	0.95529	0.65915-1.38446	0.596	0.77703	0.31226-1.93357	0.572	0.79035	0.35626-1.75334	0.0455	0.73413	0.788	9.84578	14	0.77337	9.72536	13	0.71622	7.38135e-79	0.0548688
ebi-a-GCST90001639	12	0.459	1.40964	0.58848-3.3767	0.734	1.13736	0.54195-2.38689	0.81	1.0663	0.63108-1.80169	0.926	0.94319	0.28138-3.16155	0.675	1.2012	0.52180-2.76522	-0.06925	0.45165	0.695	8.04742	11	0.70905	7.434	10	0.68393	3.41248e-63	0.0547204
ebi-a-GCST90001819	20	0.174	0.62846	0.33023-1.1960	0.071	0.61834	0.36710-1.04154	0.81	0.94903	0.61888-1.45531	0.505	1.43423	0.50675-4.05929	0.182	0.651	0.35489-1.19417	0.1604	0.12067	0.045	31.2152	19	0.03823	27.2042	18	0.07525	5.40492e-155	0.0565069
ebi-a-GCST90002105	16	0.536	0.91806	0.70520-1.1952	0.77	1.03477	0.82272-1.30148	0.811	1.02345	0.84676-1.23702	0.248	0.76072	0.48683-1.18871	0.881	1.01952	0.79428-1.30863	0.08229	0.26508	0.692	11.5231	15	0.71471	10.1753	14	0.74926	0	0.0531011
ebi-a-GCST90001576	13	0.97	1.01903	0.38563-2.6928	0.331	0.69263	0.33005-1.45352	0.812	0.938	0.55417-1.58769	0.44	1.75175	0.44296-6.92755	0.24	0.5393	0.20282-1.43401	-0.01904	0.84605	0.734	8.44825	12	0.74919	8.40873	11	0.67629	7.95113e-65	0.0542274
ebi-a-GCST90002021	14	0.606	0.7929	0.33587-1.8718	0.553	0.86541	0.53698-1.39471	0.812	0.95767	0.67103-1.36676	0.636	0.81584	0.35820-1.85816	0.517	0.808	0.43159-1.51270	0.06433	0.64231	0.338	14.971	13	0.30917	14.693	12	0.25866	4.78623e-87	0.0553331
ebi-a-GCST90001757	24	0.63	1.03559	0.90013-1.1914	0.805	1.01898	0.87805-1.18252	0.813	1.01548	0.89412-1.15331	0.884	0.96283	0.58129-1.59481	0.574	1.03599	0.91733-1.17000	-0.03296	0.49583	0.361	27.6179	23	0.23058	27.0286	22	0.21014	2.77316e-173	0.0506578
ebi-a-GCST90001400	13	0.354	1.1631	0.85673-1.5790	0.567	1.09937	0.79496-1.52035	0.814	1.02996	0.80562-1.31676	0.031	0.41497	0.20515-0.83939	0.494	1.11385	0.82533-1.50322	-0.08545	0.21711	0.703	10.2377	12	0.59511	8.52335	11	0.6658	4.94789e-66	0.0510053
ebi-a-GCST90001481	27	0.846	1.02197	0.82302-1.2690	0.767	0.96137	0.74099-1.24730	0.815	0.97976	0.82547-1.16289	0.589	0.90238	0.62481-1.30325	0.526	0.93014	0.74599-1.15975	-0.04218	0.53778	0.907	15.9417	26	0.9376	15.5513	25	0.92754	5.12043e-303	0.0518574
ebi-a-GCST90001877	16	0.288	0.85518	0.64805-1.1285	0.733	0.95852	0.75148-1.22260	0.815	0.97872	0.81723-1.17214	0.73	1.07342	0.72293-1.59383	0.725	0.96013	0.76870-1.19923	0.0904	0.23392	0.569	15.3743	15	0.4248	13.8267	14	0.4627	2.4692e-99	0.0518701
ebi-a-GCST90001914	17	0.957	1.01724	0.55255-1.8727	0.796	0.93176	0.54464-1.59403	0.816	0.95211	0.62903-1.44112	0.48	1.40379	0.56000-3.51897	0.768	0.92638	0.56166-1.52792	-0.02459	0.77031	0.231	20.7949	16	0.18653	20.6731	15	0.1476	7.09947e-84	0.0537773
ebi-a-GCST90001623	27	0.62	1.20141	0.58653-2.4609	0.509	1.19545	0.70412-2.02965	0.817	1.04909	0.69914-1.57422	0.145	0.4538	0.16208-1.27057	0.435	1.28416	0.69161-2.38440	-0.03488	0.65453	0.102	36.5011	26	0.08283	36.204	25	0.06856	9.0341e-182	0.0569254
ebi-a-GCST90001423	12	0.492	1.63656	0.42244-6.3401	0.78	0.88868	0.38842-2.03324	0.818	0.92351	0.46936-1.81711	0.905	1.08661	0.28552-4.13530	0.966	0.97677	0.33638-2.83635	-0.12313	0.36102	0.26	13.9014	11	0.2385	12.7345	10	0.2389	2.04004e-59	0.055971
ebi-a-GCST90001952	18	0.47	1.11455	0.83616-1.4856	0.658	1.05168	0.84122-1.31480	0.823	0.97854	0.80919-1.18333	0.262	0.65125	0.31563-1.34375	0.647	1.05636	0.83866-1.33056	-0.07087	0.25404	0.648	14.0893	17	0.66077	12.6895	16	0.69531	0	0.054164
ebi-a-GCST90001738	17	0.252	0.60971	0.26999-1.3769	0.849	0.93049	0.44342-1.95258	0.824	0.93963	0.54308-1.62576	0.602	0.75507	0.26848-2.12358	0.731	0.86979	0.39834-1.89923	0.12478	0.18869	0.25	19.9279	16	0.22348	17.6913	15	0.27924	4.05893e-96	0.0558943
ebi-a-GCST90001542	19	0.616	1.08845	0.78632-1.5067	0.895	0.97945	0.71995-1.33249	0.825	0.9711	0.74911-1.25888	0.086	0.53559	0.27275-1.05173	0.971	0.99508	0.76820-1.28897	-0.11605	0.27534	0.209	24.1886	18	0.14895	22.5066	17	0.16601	1.481e-99	0.0514919
ebi-a-GCST90002017	20	0.881	1.07767	0.41042-2.8297	0.473	1.21216	0.71705-2.04913	0.825	1.04664	0.69870-1.56785	0.648	1.20661	0.54546-2.66912	0.556	1.20661	0.65323-2.22876	-0.00861	0.94834	0.206	24.7688	19	0.16829	24.7629	18	0.13159	4.178e-147	0.0564101
ebi-a-GCST90001943	19	0.236	0.85258	0.66097-1.0997	0.476	0.90293	0.68190-1.19560	0.825	0.97681	0.79327-1.20283	1	0.99988	0.61354-1.62949	0.45	0.9091	0.71379-1.15786	0.12975	0.08651	0.907	10.7226	18	0.90575	7.41244	17	0.97755	1.97734e-97	0.0509201
ebi-a-GCST90001844	23	0.666	0.89614	0.54887-1.4631	0.943	0.9845	0.64098-1.51213	0.827	1.03414	0.76575-1.39659	0.637	0.83841	0.40697-1.72720	0.838	0.95035	0.58703-1.53854	0.04416	0.47661	0.551	20.8984	22	0.52702	20.3732	21	0.49775	3.42423e-141	0.0532504
ebi-a-GCST90001433	16	0.109	0.34227	0.10010-1.1703	0.776	1.10708	0.54919-2.23166	0.829	0.94265	0.55233-1.60882	0.688	1.29363	0.37663-4.44331	0.725	1.1792	0.47825-2.90751	0.22695	0.09881	0.214	19.1843	15	0.2055	15.6823	14	0.33316	1.82393e-113	0.0561904
ebi-a-GCST90002074	20	0.996	1.00147	0.59930-1.6735	0.535	1.15891	0.72722-1.84687	0.829	1.03627	0.75051-1.43084	0.851	1.09188	0.44076-2.70490	0.523	1.15995	0.74170-1.81404	0.01112	0.86873	0.573	17.7974	19	0.53601	17.7693	18	0.47095	8.93324e-297	0.0563474
ebi-a-GCST90001733	19	0.861	0.94507	0.50704-1.7615	0.873	0.95634	0.55250-1.65538	0.83	0.95927	0.65611-1.40251	0.824	0.91525	0.42344-1.97829	0.875	0.94964	0.50381-1.79002	0.00368	0.95343	0.958	9.68237	18	0.94178	9.67886	17	0.91653	5.96987e-95	0.052619
ebi-a-GCST90001558	22	0.536	0.86785	0.55800-1.3498	0.902	0.97193	0.61685-1.53139	0.83	0.96796	0.71890-1.30332	0.649	0.83847	0.39690-1.77131	0.881	0.96473	0.60618-1.53538	0.04715	0.51963	0.717	16.1	21	0.76401	15.6703	20	0.73685	3.17228e-140	0.0524606
ebi-a-GCST90001575	30	0.483	0.86239	0.57312-1.2977	0.598	0.88842	0.57225-1.37926	0.833	0.96972	0.72913-1.28971	0.251	1.57176	0.73712-3.35144	0.596	0.8807	0.55355-1.40121	0.04066	0.43586	0.388	30.3986	29	0.39431	29.735	28	0.376	1.35471e-158	0.0524683
ebi-a-GCST90001429	22	0.311	1.63794	0.64634-4.1509	0.794	1.08435	0.59051-1.99118	0.833	0.95287	0.60779-1.49388	0.212	0.4874	0.16315-1.45611	0.987	0.99248	0.41555-2.37035	-0.11881	0.20898	0.374	23.1902	21	0.33392	21.3878	20	0.37463	3.62479e-114	0.0542118
ebi-a-GCST90001772	20	0.6	0.92453	0.69312-1.2332	0.818	0.96867	0.73895-1.26982	0.835	1.02586	0.80716-1.30382	0.463	1.16398	0.78256-1.73131	0.808	0.97154	0.77236-1.22209	0.09037	0.23138	0.155	27.6442	19	0.09052	25.4729	18	0.11243	2.90765e-142	0.0515463
ebi-a-GCST90001466	17	0.886	0.94817	0.46491-1.9338	0.731	1.11053	0.61059-2.01984	0.835	0.95358	0.61014-1.49033	0.603	1.28564	0.50826-3.25202	0.443	1.26766	0.70168-2.29017	0.0017	0.98416	0.561	15.2149	16	0.50896	15.2145	15	0.43608	8.02571e-88	0.0534261
ebi-a-GCST90001910	13	0.823	1.05359	0.67383-1.6474	0.779	0.94224	0.62188-1.42763	0.836	1.03563	0.74301-1.44351	0.165	0.56752	0.26792-1.20215	0.964	0.99159	0.69458-1.41561	-0.0104	0.90714	0.233	16.1686	12	0.18363	16.1477	11	0.13573	1.95452e-68	0.0517201
ebi-a-GCST90001790	20	0.965	0.99033	0.64632-1.5174	0.698	0.91431	0.58159-1.43738	0.837	0.96949	0.72232-1.30124	0.633	0.84204	0.42080-1.68496	0.539	0.85897	0.53367-1.38257	-0.00858	0.89419	0.837	12.5042	19	0.86296	12.486	18	0.82116	2.82048e-163	0.0524057
ebi-a-GCST90001892	13	0.387	1.19018	0.81454-1.7391	0.846	1.03368	0.73954-1.44482	0.837	1.02745	0.79409-1.32940	0.729	1.11794	0.60333-2.07149	0.722	1.05671	0.78559-1.42140	-0.09758	0.32376	0.42	13.176	12	0.35638	12.0107	11	0.36284	1.19226e-212	0.0529324
ebi-a-GCST90001490	7	0.681	1.15931	0.59696-2.2514	0.838	1.0722	0.55002-2.09015	0.837	0.94948	0.57870-1.55784	0.897	1.06592	0.42166-2.69450	0.94	0.9698	0.45192-2.08114	-0.11172	0.4165	0.606	4.36637	6	0.62723	3.5825	5	0.61094	1.1973e-34	0.0515899
ebi-a-GCST90002102	21	0.39	0.89654	0.70282-1.1436	0.758	0.96089	0.74559-1.23835	0.839	1.02025	0.84103-1.23766	0.946	0.98721	0.68482-1.42311	0.773	0.96662	0.76988-1.21362	0.14157	0.12348	0.117	27.6556	20	0.11781	24.3289	19	0.18384	3.55377e-171	0.0513434
ebi-a-GCST90001781	21	0.398	1.21825	0.77887-1.9055	0.661	1.10425	0.70863-1.72072	0.839	1.02961	0.77649-1.36525	0.872	0.94568	0.48249-1.85355	0.688	1.09479	0.70838-1.69199	-0.07502	0.35409	0.618	18.0313	20	0.58535	17.1289	19	0.58113	2.59426e-136	0.0534541
ebi-a-GCST90001609	17	0.959	0.97981	0.45716-2.1000	0.71	0.90436	0.53235-1.53634	0.84	0.95279	0.59587-1.52351	0.835	1.12626	0.37551-3.37796	0.886	0.96101	0.56292-1.64064	-0.00781	0.92704	0.215	21.5043	16	0.15993	21.4919	15	0.12184	1.05829e-89	0.0533842
ebi-a-GCST90001666	41	0.705	1.01908	0.92467-1.1231	0.665	0.97273	0.85820-1.10254	0.842	0.99106	0.90728-1.08258	0.851	0.98461	0.83875-1.15582	0.937	0.99534	0.88775-1.11598	-0.06832	0.20278	0.054	54.2496	40	0.06575	52.0115	39	0.07941	1.07369e-277	0.050345
ebi-a-GCST90001687	15	0.394	1.89234	0.45875-7.8059	0.485	1.30755	0.61648-2.77327	0.843	1.05521	0.61949-1.79738	0.472	1.59835	0.46072-5.54514	0.585	1.37044	0.45455-4.13181	-0.11287	0.39915	0.507	13.6415	14	0.47675	12.8815	13	0.457	2.00982e-86	0.0547271
ebi-a-GCST90002061	23	0.766	1.07443	0.67317-1.7149	0.801	0.95227	0.65089-1.39319	0.843	1.02849	0.77825-1.35920	0.939	1.02835	0.50693-2.08609	0.837	1.03944	0.72215-1.49612	-0.01607	0.8217	0.838	15.6414	22	0.83328	15.5893	21	0.79226	1.53737e-252	0.0536227
ebi-a-GCST90001589	12	0.571	0.77141	0.32374-1.8381	0.748	0.89041	0.43809-1.80972	0.844	1.05134	0.63821-1.73188	0.981	0.9865	0.33426-2.91140	0.793	0.90632	0.44267-1.85559	0.07621	0.41304	0.702	8.22742	11	0.6928	7.49792	10	0.67775	8.98957e-59	0.0526365
ebi-a-GCST90001762	19	0.256	0.67571	0.35140-1.2993	0.851	1.04971	0.63305-1.74059	0.845	0.96498	0.67491-1.37973	0.613	1.2328	0.55524-2.73722	0.981	1.00718	0.55828-1.81701	0.09937	0.2222	0.322	20.9476	18	0.28207	19.1399	17	0.32056	2.42433e-126	0.0525402
ebi-a-GCST90001420	15	0.986	1.01047	0.31826-3.2082	0.291	0.67037	0.31920-1.40787	0.845	0.9336	0.46829-1.86126	0.364	0.50011	0.11767-2.12559	0.357	0.59236	0.20189-1.73799	-0.02298	0.86692	0.022	27.6332	14	0.01591	27.5713	13	0.01038	3.21466e-72	0.0554982
ebi-a-GCST90001915	12	0.834	1.04273	0.71243-1.5262	0.776	1.05107	0.74559-1.48170	0.846	0.97109	0.72261-1.30501	0.398	0.78201	0.45195-1.35310	0.822	1.03964	0.74681-1.44727	-0.0493	0.55602	0.374	12.5904	11	0.32094	12.1399	10	0.2758	3.5901e-59	0.0509811
ebi-a-GCST90001798	23	0.925	0.97091	0.53060-1.7766	0.619	0.9084	0.62174-1.32721	0.847	1.02986	0.76451-1.38731	0.608	0.86974	0.51452-1.47020	0.738	0.93235	0.62208-1.39739	0.02383	0.82691	0.391	24.6479	22	0.31421	24.5905	21	0.26534	0	0.0548003
ebi-a-GCST90001722	19	0.937	0.97334	0.50311-1.8830	0.899	0.96453	0.55279-1.68295	0.849	0.96233	0.64797-1.42922	0.586	1.28099	0.53416-3.07199	0.845	1.05565	0.61774-1.80401	-0.00358	0.96684	0.744	14.7314	18	0.68032	14.7296	17	0.61495	2.65919e-97	0.0523399
ebi-a-GCST90001638	26	0.739	1.1555	0.49886-2.6765	0.627	1.16577	0.62786-2.16450	0.85	1.04172	0.68202-1.59114	0.328	1.85025	0.55205-6.20123	0.462	1.39934	0.57949-3.37912	-0.02845	0.78041	0.14	32.4996	25	0.14406	32.3923	24	0.11756	4.08578e-193	0.0552528
ebi-a-GCST90001644	33	0.363	1.27521	0.76115-2.1365	0.77	1.06786	0.68758-1.65848	0.851	0.97162	0.71976-1.31160	0.759	1.14041	0.49596-2.62226	0.881	1.04755	0.57233-1.91738	-0.07072	0.21375	0.584	29.5924	32	0.58896	27.9811	31	0.62214	3.44136e-197	0.0524664
ebi-a-GCST90001396	15	0.993	1.006	0.26584-3.8070	0.841	0.92818	0.44870-1.92001	0.853	0.94992	0.55228-1.63387	0.94	0.95772	0.31518-2.91013	0.986	0.99043	0.35723-2.74600	-0.01136	0.9277	0.598	12.6966	14	0.55054	12.6881	13	0.47219	1.2834e-72	0.0530915
ebi-a-GCST90001724	24	0.555	0.85921	0.52309-1.4113	0.508	0.84396	0.51063-1.39488	0.855	1.03347	0.72613-1.47089	0.466	0.75429	0.35785-1.58993	0.415	0.8094	0.49133-1.33336	0.06681	0.31153	0.443	24.0884	23	0.39893	22.9682	22	0.40353	3.70645e-135	0.052471
ebi-a-GCST90001850	24	0.915	1.03119	0.58921-1.8047	0.527	0.86422	0.54965-1.35881	0.857	1.02941	0.75122-1.41061	0.485	0.73454	0.31339-1.72164	0.355	0.74281	0.40071-1.37699	-0.00059	0.99415	0.412	23.9099	23	0.40881	23.9098	22	0.35197	1.70809e-148	0.0524127
ebi-a-GCST90001874	26	0.813	1.04933	0.70759-1.5561	0.656	0.93434	0.69314-1.25948	0.857	1.0196	0.82508-1.25998	0.44	0.81088	0.48028-1.36906	0.623	0.8928	0.57152-1.39468	-0.01133	0.86681	0.6	22.5832	25	0.60189	22.5545	24	0.54621	1.32129e-173	0.0524044
ebi-a-GCST90001704	18	0.597	1.0818	0.81290-1.4396	0.484	1.1098	0.82908-1.48556	0.86	1.01999	0.81920-1.27000	0.798	0.92211	0.50060-1.69854	0.424	1.13225	0.84104-1.52430	-0.03908	0.53826	0.696	12.4927	17	0.76943	12.0971	16	0.73727	0	0.0535007
ebi-a-GCST90001476	5	0.944	0.90745	0.07462-11.0355	0.692	0.84551	0.36827-1.94121	0.86	0.94101	0.47911-1.84823	0.663	0.74665	0.22102-2.52234	0.695	0.81943	0.32426-2.07077	0.00822	0.97825	0.818	1.76152	4	0.77952	1.76064	3	0.62354	4.49684e-39	0.0523212
ebi-a-GCST90001782	18	0.311	1.1471	0.88713-1.4832	0.731	1.04961	0.79627-1.38356	0.861	1.0178	0.83552-1.23983	0.584	1.13503	0.72746-1.77095	0.626	1.07175	0.81532-1.40884	-0.09405	0.17375	0.678	14.0549	17	0.66321	12.028	16	0.74205	5.08919e-132	0.0512104
ebi-a-GCST90002031	20	0.753	1.04485	0.79871-1.3668	0.886	0.98362	0.78473-1.23293	0.862	1.01772	0.83467-1.24093	0.127	1.60271	0.89785-2.86092	0.843	1.02337	0.81669-1.28237	-0.01836	0.7725	0.238	24.0231	19	0.19527	23.9087	18	0.15804	0	0.052816
ebi-a-GCST90001799	19	0.846	0.93373	0.47309-1.8429	0.782	0.93539	0.58333-1.49993	0.862	0.97037	0.69046-1.36375	0.521	1.22967	0.66236-2.28286	0.671	1.12692	0.65471-1.93969	0.01464	0.89855	0.488	18.7166	18	0.40947	18.6982	17	0.34613	2.30168e-124	0.0532064
ebi-a-GCST90001848	14	0.746	0.8867	0.43531-1.8061	0.787	1.09145	0.57786-2.06152	0.863	0.96189	0.61932-1.49393	0.811	1.12472	0.43821-2.88671	0.789	1.09984	0.55574-2.17665	0.02606	0.78016	0.792	9.37445	13	0.74411	9.29297	12	0.67772	1.2967e-75	0.0521443
ebi-a-GCST90001978	15	0.619	0.93019	0.70388-1.2293	0.94	1.01236	0.73582-1.39282	0.864	1.02055	0.80888-1.28762	0.322	0.77077	0.46896-1.26683	0.99	1.00179	0.75163-1.33522	0.08448	0.25887	0.573	12.877	14	0.53623	11.4829	13	0.57043	3.67543e-74	0.0506241
ebi-a-GCST90001759	23	0.274	0.83633	0.61211-1.1427	0.241	0.81457	0.57830-1.14738	0.864	1.02316	0.78692-1.33032	0.597	1.19738	0.62010-2.31208	0.301	0.83087	0.58955-1.17099	0.10315	0.05325	0.115	29.3823	22	0.13427	24.4901	21	0.26992	1.60298e-138	0.051212
ebi-a-GCST90002054	10	0.525	1.51107	0.44754-5.1020	0.822	1.08439	0.53594-2.19408	0.865	1.04832	0.60819-1.80695	0.402	0.56555	0.15869-2.01556	0.132	2.02798	0.87834-4.68232	-0.1012	0.52532	0.233	11.3626	9	0.25167	10.769	8	0.21514	1.35695e-84	0.0540813
ebi-a-GCST90001743	23	0.271	0.72393	0.41351-1.2674	0.691	1.09321	0.70449-1.69642	0.867	0.97391	0.71415-1.32816	0.992	1.00362	0.48665-2.06977	0.878	1.04422	0.60432-1.80431	0.08658	0.22612	0.735	17.6529	22	0.72636	16.0979	21	0.76413	5.06918e-142	0.0515594
ebi-a-GCST90001551	21	0.637	0.84471	0.42382-1.6836	0.261	1.46137	0.75455-2.83029	0.869	0.95831	0.57767-1.58976	0.775	0.84629	0.27436-2.61051	0.63	1.19608	0.58325-2.45281	0.03957	0.59574	0.176	26.5852	20	0.14734	26.1839	19	0.12514	4.84815e-112	0.0534658
ebi-a-GCST90001737	24	0.989	0.99666	0.63328-1.5685	0.848	0.96321	0.65582-1.41468	0.87	1.02968	0.72551-1.46136	0.168	2.02806	0.76673-5.36438	0.997	0.99923	0.69213-1.44259	0.01821	0.82094	0.061	37.3098	23	0.03016	37.2211	22	0.02237	2.2051e-124	0.0518188
ebi-a-GCST90001947	22	0.691	0.95094	0.74444-1.2147	0.733	1.03744	0.83993-1.28141	0.871	1.01363	0.86087-1.19348	0.931	1.01975	0.65810-1.58013	0.857	1.01975	0.82686-1.25764	0.0423	0.50054	0.933	12.7076	21	0.91852	12.2369	20	0.90768	0	0.0519395
ebi-a-GCST90002043	15	0.989	0.99637	0.59819-1.6596	0.779	0.94016	0.61091-1.44685	0.871	0.97438	0.71232-1.33287	0.775	1.11775	0.52957-2.35922	0.295	0.69904	0.36698-1.33154	-0.00765	0.91518	0.602	11.5488	14	0.64249	11.537	13	0.56593	1.69198e-80	0.0518714
ebi-a-GCST90002072	20	0.641	0.89111	0.55349-1.4347	0.549	0.87436	0.56333-1.35714	0.873	1.0269	0.74075-1.42360	0.77	1.13189	0.49983-2.56323	0.551	0.88132	0.58611-1.32522	0.05466	0.42916	0.315	22.2461	19	0.27218	21.4659	18	0.25656	2.34325e-112	0.0516676
ebi-a-GCST90001753	26	0.601	1.09354	0.78547-1.5224	0.54	1.11508	0.78674-1.58046	0.875	0.98026	0.76462-1.25671	0.468	0.78933	0.42051-1.48164	0.764	1.0518	0.75875-1.45802	-0.04938	0.33605	0.433	25.9256	25	0.41158	24.9247	24	0.40986	1.50232e-141	0.0508959
ebi-a-GCST90001836	22	0.997	0.99933	0.69356-1.4399	0.438	1.15642	0.80110-1.66934	0.876	1.01954	0.80013-1.29911	0.299	0.67159	0.32278-1.39733	0.407	1.16598	0.81681-1.66441	0.01113	0.88728	0.533	19.4935	21	0.55351	19.4729	20	0.49131	3.62693e-132	0.0517464
ebi-a-GCST90001649	19	0.416	1.24474	0.74392-2.0827	0.234	1.31087	0.83941-2.04713	0.876	1.02581	0.74429-1.41383	0.954	0.97769	0.45938-2.08076	0.31	1.27807	0.80631-2.02585	-0.06303	0.35945	0.746	13.7459	18	0.7455	12.8587	17	0.74559	2.37337e-258	0.0525715
ebi-a-GCST90001767	19	0.82	1.08308	0.55138-2.1275	0.73	0.93411	0.63442-1.37537	0.877	0.97223	0.68136-1.38726	0.682	0.87323	0.46172-1.65149	0.671	0.91696	0.61831-1.35985	-0.05002	0.71426	0.078	28.9605	18	0.04886	28.7263	17	0.03713	2.439e-139	0.0531096
ebi-a-GCST90001528	20	0.877	0.96812	0.64686-1.4489	0.603	0.92886	0.70316-1.22699	0.877	1.0193	0.79963-1.29931	0.553	0.86396	0.53781-1.38789	0.895	0.9807	0.73765-1.30382	0.02817	0.75405	0.098	29.0731	19	0.06484	28.9106	18	0.04948	9.8305e-198	0.0519407
ebi-a-GCST90002022	17	0.575	0.72833	0.24631-2.1537	0.616	0.86155	0.48095-1.54334	0.879	1.0331	0.68036-1.56871	0.65	0.8037	0.31857-2.02761	0.659	0.84636	0.40880-1.75227	0.07656	0.50266	0.471	16.0582	16	0.44891	15.5685	15	0.41129	2.46958e-96	0.0521627
ebi-a-GCST90001391	13	0.841	1.05559	0.62997-1.7688	0.765	1.07144	0.68160-1.68425	0.879	1.02831	0.71864-1.47141	0.858	1.06072	0.56310-1.99809	0.854	1.04379	0.66750-1.63221	-0.01195	0.89262	0.968	5.4593	12	0.94086	5.44022	11	0.90799	2.43585e-65	0.0508809
ebi-a-GCST90001674	12	0.695	0.87774	0.46598-1.6534	0.179	0.68307	0.39192-1.19050	0.882	1.03424	0.66418-1.61049	0.496	0.65249	0.19856-2.14413	0.207	0.65966	0.35896-1.21224	0.06356	0.4843	0.201	13.9418	11	0.23623	13.2431	10	0.21039	2.48437e-57	0.0513188
ebi-a-GCST90001935	13	0.821	0.8699	0.26833-2.8201	0.807	1.09759	0.51995-2.31695	0.886	0.96094	0.55704-1.65771	0.663	1.4012	0.31880-6.15863	0.433	1.67439	0.48149-5.82273	0.02276	0.85317	0.447	12.0556	12	0.44122	12.0164	11	0.36241	5.01211e-70	0.0519214
ebi-a-GCST90002112	13	0.566	1.12644	0.75933-1.6710	0.509	1.10501	0.82142-1.48651	0.886	1.01882	0.78908-1.31545	0.966	1.01122	0.61194-1.67101	0.593	1.08625	0.80854-1.45934	-0.06116	0.51852	0.357	14.6452	12	0.26141	14.0759	11	0.22882	1.92527e-176	0.0518527
ebi-a-GCST90001529	14	0.976	1.00711	0.64116-1.5819	0.738	0.92922	0.60405-1.42944	0.887	0.9785	0.72572-1.31932	0.966	1.014	0.54173-1.89797	0.786	0.94183	0.61695-1.43777	-0.01349	0.87026	0.758	10.1486	13	0.68174	10.1207	12	0.60537	1.12648e-72	0.0510441
ebi-a-GCST90001675	21	0.218	0.80275	0.57272-1.1252	0.727	0.93301	0.63227-1.37680	0.887	0.98025	0.74463-1.29043	0.592	1.24425	0.56691-2.73087	0.516	0.88446	0.61448-1.27306	0.09153	0.08011	0.395	21.8589	20	0.34822	18.4407	19	0.4932	6.48613e-106	0.0507901
ebi-a-GCST90001632	22	0.416	1.3415	0.67020-2.6852	0.806	1.07413	0.60669-1.90170	0.887	1.03051	0.68051-1.56053	0.695	0.81691	0.30190-2.21051	0.974	1.0123	0.48665-2.10569	-0.06838	0.36296	0.393	22.5735	21	0.36713	21.6359	20	0.36059	2.68736e-130	0.0519793
ebi-a-GCST90001765	21	0.263	1.17797	0.89154-1.5564	0.827	1.03524	0.75878-1.41242	0.887	0.98397	0.78671-1.23068	0.531	1.16371	0.73058-1.85362	0.714	1.05634	0.79121-1.41032	-0.1119	0.04697	0.596	18.5179	20	0.55333	14.0043	19	0.78344	6.11778e-162	0.0506621
ebi-a-GCST90001876	15	0.223	0.85521	0.67312-1.0866	0.699	0.96174	0.78903-1.17224	0.89	0.98772	0.82849-1.17756	0.689	0.91501	0.59795-1.40020	0.566	0.9462	0.78698-1.13762	0.12962	0.12551	0.261	18.548	14	0.18295	15.3767	13	0.28443	4.62002e-95	0.0506014
ebi-a-GCST90001859	20	0.445	1.18865	0.77010-1.8347	0.707	1.08162	0.71872-1.62775	0.891	0.97904	0.72358-1.32468	0.733	0.88196	0.43291-1.79679	0.98	0.99523	0.68947-1.43659	-0.08225	0.24282	0.346	22.26	19	0.27151	20.5917	18	0.30051	7.08061e-160	0.0513562
ebi-a-GCST90002099	23	0.26	0.84933	0.64403-1.1201	0.724	0.94665	0.69836-1.28320	0.892	0.98475	0.78902-1.22904	0.664	1.12787	0.66028-1.92658	0.771	0.95536	0.70477-1.29506	0.09778	0.11448	0.327	24.8707	22	0.3033	22.0261	21	0.39801	5.38106e-137	0.0506326
ebi-a-GCST90001504	18	0.678	0.92626	0.64981-1.3203	0.887	0.97524	0.69096-1.37649	0.893	1.01753	0.79078-1.30929	0.674	1.12052	0.66585-1.88567	0.901	1.01916	0.75902-1.36847	0.07423	0.47049	0.974	7.20593	17	0.98072	6.65951	16	0.97928	5.52932e-99	0.0505351
ebi-a-GCST90001426	21	0.87	1.03493	0.68980-1.5527	0.763	0.94576	0.65813-1.35909	0.893	0.97791	0.70626-1.35404	0.266	1.5779	0.72218-3.44758	0.693	0.93648	0.67946-1.29073	-0.03015	0.63937	0.165	28.9112	20	0.08952	28.5702	19	0.07305	2.31882e-111	0.0509066
ebi-a-GCST90001660	22	0.856	0.96387	0.65137-1.4263	0.512	1.14804	0.76014-1.73389	0.893	1.01874	0.77636-1.33680	0.929	0.96678	0.46200-2.02310	0.673	1.10061	0.70984-1.70652	0.02458	0.70484	0.621	17.3222	21	0.6914	17.1745	20	0.64161	2.19176e-184	0.0510727
ebi-a-GCST90001401	20	0.593	0.7851	0.32822-1.8780	0.324	1.35028	0.74363-2.45185	0.895	1.0289	0.67361-1.57159	0.857	1.09338	0.41985-2.84741	0.506	1.25754	0.64881-2.43737	0.06799	0.49576	0.731	14.1914	19	0.77242	13.708	18	0.74792	3.21726e-128	0.0517439
ebi-a-GCST90001486	12	0.971	1.0061	0.73214-1.3826	0.698	0.94329	0.70228-1.26701	0.897	1.0175	0.78339-1.32159	0.82	0.92978	0.50488-1.71228	0.626	0.92978	0.69960-1.23570	0.01201	0.89366	0.337	13.3778	11	0.26935	13.3527	10	0.20462	1.34906e-61	0.0503444
ebi-a-GCST90001716	18	0.695	1.06358	0.78565-1.4398	0.493	1.10676	0.82841-1.47864	0.897	1.01472	0.81299-1.26651	0.772	0.91416	0.50273-1.66232	0.398	1.14171	0.84635-1.54015	-0.03147	0.6612	0.775	10.4857	17	0.88202	10.2863	16	0.85125	0	0.0518687
ebi-a-GCST90001872	19	0.201	0.85308	0.67519-1.0779	0.714	0.96189	0.78149-1.18394	0.898	1.01049	0.86137-1.18544	0.398	0.83952	0.56514-1.24713	0.505	0.93205	0.76118-1.14129	0.12017	0.06886	0.729	14.8086	18	0.67507	11.0363	17	0.85467	4.68055e-128	0.050553
ebi-a-GCST90001673	11	0.369	0.71511	0.35696-1.4326	0.386	0.76446	0.41669-1.40247	0.899	0.96734	0.57910-1.61585	0.736	1.2257	0.38703-3.88173	0.288	0.71539	0.39866-1.28377	0.1129	0.25038	0.216	14.6754	10	0.14435	12.5676	9	0.18317	8.11191e-54	0.0511303
ebi-a-GCST90001517	26	0.854	0.9828	0.81845-1.1801	0.883	0.98497	0.80546-1.20449	0.9	1.00969	0.86891-1.17329	0.414	0.88084	0.65287-1.18842	0.926	0.99115	0.82399-1.19222	0.0245	0.61748	0.987	12.6068	25	0.98097	12.3508	24	0.97566	3.58402e-180	0.0504539
ebi-a-GCST90001926	21	0.311	1.46058	0.71621-2.9786	0.897	1.03675	0.59951-1.79290	0.901	0.97498	0.65429-1.45285	0.715	1.19652	0.46302-3.09202	0.405	1.3739	0.66038-2.85834	-0.11906	0.19558	0.797	13.9989	20	0.83055	12.1994	19	0.87693	3.43929e-165	0.051977
ebi-a-GCST90001823	13	0.701	0.78067	0.22803-2.6727	0.632	0.84224	0.41748-1.69917	0.902	1.0304	0.63920-1.66104	0.762	0.84333	0.28631-2.48399	0.536	0.77822	0.36007-1.68198	0.07226	0.6409	0.775	8.26973	12	0.76371	8.0397	11	0.70974	1.66355e-68	0.0519989
ebi-a-GCST90001703	13	0.944	1.01159	0.73992-1.3830	0.35	1.15047	0.85765-1.54327	0.905	0.98628	0.78546-1.23843	0.317	0.71583	0.38216-1.34085	0.43	1.12981	0.84304-1.51414	-0.02222	0.82109	0.61	7.86876	12	0.7953	7.81511	11	0.72976	0	0.0513526
ebi-a-GCST90001888	18	0.841	1.06267	0.59243-1.9062	0.829	0.94594	0.57096-1.56718	0.907	0.97976	0.69611-1.37900	0.337	1.57499	0.63978-3.87724	0.894	0.9627	0.55440-1.67170	-0.02689	0.74098	0.543	16.1841	17	0.51083	16.0704	16	0.44806	1.74376e-160	0.0512634
ebi-a-GCST90001868	10	0.879	0.95533	0.54124-1.6862	0.711	0.93028	0.63466-1.36360	0.908	0.98096	0.70780-1.35954	0.495	0.77021	0.37533-1.58052	0.661	0.92026	0.64273-1.31764	0.01202	0.91391	0.688	7.14481	9	0.62205	7.13236	8	0.52242	1.08589e-198	0.0513286
ebi-a-GCST90001925	17	0.829	1.19485	0.24484-5.8309	0.626	0.82774	0.38667-1.77193	0.909	1.04052	0.52650-2.05637	0.747	0.83741	0.29081-2.41138	0.705	0.83741	0.33915-2.06766	-0.02884	0.85126	0.039	28.2696	16	0.02935	28.2011	15	0.02034	2.92215e-83	0.0528594
ebi-a-GCST90002004	22	0.972	1.00563	0.73607-1.3739	0.471	1.13324	0.80624-1.59287	0.91	1.01399	0.79797-1.28849	0.654	1.14115	0.64580-2.01646	0.474	1.12519	0.81934-1.54522	0.00426	0.93609	0.92	12.4331	21	0.92718	12.4265	20	0.90062	2.86915e-129	0.0504134
ebi-a-GCST90001806	26	0.792	1.10138	0.54184-2.2387	0.643	0.89662	0.56483-1.42329	0.911	0.97969	0.68305-1.40516	0.963	0.98324	0.48579-1.99008	0.949	0.98324	0.58920-1.64080	-0.0355	0.70871	0.139	33.7824	25	0.11264	33.5825	24	0.09237	0	0.0518797
ebi-a-GCST90002058	22	0.908	1.02448	0.68259-1.5376	0.536	0.88335	0.59628-1.30864	0.913	0.98504	0.75211-1.29010	0.422	0.76458	0.40193-1.45445	0.304	0.75042	0.43994-1.28003	-0.01698	0.80242	0.796	14.3804	21	0.85271	14.3162	20	0.81411	4.65471e-168	0.0506798
ebi-a-GCST90001903	19	0.92	0.96566	0.49459-1.8854	0.502	0.83448	0.49194-1.41551	0.915	0.97948	0.66894-1.43417	0.68	0.81083	0.30413-2.16177	0.286	0.68448	0.34844-1.34462	0.00416	0.96018	0.956	8.80445	18	0.9641	8.80189	17	0.94627	8.73878e-163	0.0513265
ebi-a-GCST90001480	24	0.348	0.7971	0.50145-1.2671	0.208	0.76432	0.50280-1.16187	0.915	0.98393	0.72951-1.32706	0.495	0.78645	0.39895-1.55033	0.201	0.75283	0.49333-1.14884	0.08505	0.25616	0.684	18.3665	23	0.73732	17.0073	22	0.76296	3.1571e-165	0.050719
ebi-a-GCST90001553	22	0.676	1.12341	0.65557-1.9251	0.89	1.04006	0.59678-1.81260	0.916	1.02276	0.67462-1.55055	0.673	1.23184	0.47441-3.19856	0.65	1.1143	0.70285-1.76664	-0.03293	0.587	0.344	24.2587	21	0.28069	23.8946	20	0.24703	3.41635e-120	0.0510877
ebi-a-GCST90001662	13	0.39	0.91229	0.74610-1.1155	0.745	0.96499	0.77880-1.19571	0.917	0.99031	0.82508-1.18864	0.937	1.02371	0.58080-1.80436	0.686	0.96039	0.79346-1.16245	0.12082	0.0831	0.778	9.57644	12	0.65306	5.94366	11	0.8771	5.37526e-70	0.0501174
ebi-a-GCST90001971	14	0.558	1.14496	0.73679-1.7793	0.76	1.08058	0.65687-1.77763	0.92	1.01819	0.71614-1.44763	0.898	1.05124	0.49513-2.23195	0.668	1.10456	0.70819-1.72278	-0.05684	0.40334	0.979	5.09655	13	0.97301	4.34615	12	0.97635	4.33454e-72	0.0504632
ebi-a-GCST90001866	13	0.864	0.92853	0.40649-2.1210	0.926	0.97665	0.59351-1.60710	0.926	1.01824	0.69700-1.48753	0.649	1.17761	0.59224-2.34158	0.484	0.81306	0.46354-1.42615	0.02775	0.80999	0.884	6.64958	12	0.87988	6.58892	11	0.83133	2.41595e-105	0.0507043
ebi-a-GCST90001532	21	0.729	0.97183	0.82869-1.1397	0.658	1.04318	0.86529-1.25764	0.927	1.00633	0.88006-1.15071	0.493	1.10877	0.83009-1.48100	0.975	1.00244	0.86183-1.16598	0.04032	0.43705	0.809	14.6366	20	0.79681	14.0063	19	0.78332	2.64576e-182	0.0501954
ebi-a-GCST90001588	26	0.724	0.88673	0.45901-1.7130	0.562	0.86039	0.51766-1.43004	0.93	1.01598	0.71243-1.44888	0.334	0.59012	0.20677-1.68420	0.204	0.63173	0.31678-1.25982	0.03031	0.63496	0.669	20.7575	25	0.70605	20.5263	24	0.66649	4.46953e-151	0.0506203
ebi-a-GCST90001670	19	0.214	1.61856	0.77920-3.3621	0.149	1.48209	0.86871-2.52855	0.931	0.9786	0.60181-1.59132	0.367	0.64774	0.25830-1.62431	0.164	1.50098	0.86669-2.59948	-0.17468	0.10024	0.048	30.9707	18	0.02901	26.2967	17	0.06922	8.89441e-265	0.0518783
ebi-a-GCST90002111	13	0.933	1.02722	0.55568-1.8989	0.513	1.14081	0.76864-1.69317	0.931	1.01303	0.75708-1.35552	0.454	1.26971	0.69343-2.32492	0.417	1.25488	0.73883-2.13137	-0.00464	0.96073	0.851	7.14475	12	0.8479	7.14221	11	0.78745	8.62225e-112	0.050619
ebi-a-GCST90001459	23	0.113	0.64432	0.38265-1.0850	0.211	0.75813	0.49107-1.17042	0.931	1.01422	0.73549-1.39857	0.989	1.00621	0.42825-2.36417	0.268	0.76359	0.47978-1.21528	0.1447	0.04183	0.885	13.5872	22	0.91548	8.8887	21	0.99006	4.16149e-235	0.0507528
ebi-a-GCST90002006	20	0.754	1.06355	0.72749-1.5549	0.485	1.13014	0.80187-1.59281	0.932	1.01166	0.77366-1.32289	0.966	1.01068	0.62347-1.63837	0.642	1.07543	0.79569-1.45353	-0.02802	0.71308	0.404	21.6844	19	0.30024	21.5175	18	0.25411	8.56816e-167	0.0503629
ebi-a-GCST90001445	10	0.347	2.41314	0.42871-13.5832	0.64	1.21988	0.53034-2.80597	0.933	1.02992	0.52044-2.03812	0.772	1.23934	0.30344-5.06178	0.772	1.1991	0.36362-3.95423	-0.18561	0.32383	0.979	2.60785	9	0.97784	1.50257	8	0.99267	4.5957e-50	0.0507534
ebi-a-GCST90001580	15	0.084	1.64709	0.97642-2.7784	0.168	1.3991	0.86771-2.25589	0.937	0.98252	0.63316-1.52464	0.859	1.08649	0.44348-2.66185	0.164	1.41678	0.89031-2.25458	-0.25941	0.01807	0.112	20.4405	14	0.11685	13.0842	13	0.44133	5.61213e-198	0.0509424
ebi-a-GCST90001424	14	0.534	1.13463	0.77069-1.6704	0.668	0.91249	0.60008-1.38754	0.941	0.98785	0.71412-1.36650	0.671	1.22306	0.49312-3.03350	0.927	0.98259	0.67964-1.42056	-0.08523	0.2407	0.375	15.2799	13	0.2902	13.5585	12	0.32979	1.9518e-79	0.0501984
ebi-a-GCST90001541	24	0.761	1.09436	0.61634-1.9431	0.449	0.80825	0.46551-1.40332	0.942	0.98653	0.68503-1.42071	0.253	1.90603	0.64826-5.60420	0.188	0.52986	0.21154-1.32720	-0.02935	0.64711	0.243	25.7569	23	0.31248	25.5071	22	0.27344	2.59008e-127	0.0504016
ebi-a-GCST90001821	24	0.582	1.23231	0.59272-2.5621	0.78	0.92908	0.55381-1.55863	0.942	1.01383	0.70038-1.46757	0.725	0.8596	0.37393-1.97609	0.905	0.9506	0.41654-2.16940	-0.04414	0.55097	0.788	16.8543	23	0.81634	16.4875	22	0.79098	1.02031e-141	0.0504374
ebi-a-GCST90001878	19	0.742	0.9524	0.71559-1.2676	0.773	0.96713	0.77073-1.21357	0.942	0.99334	0.82942-1.18966	0.212	1.55336	0.79703-3.02741	0.853	0.97948	0.78849-1.21673	0.0279	0.70996	0.423	20.4428	18	0.30845	20.2723	17	0.26054	5.42874e-128	0.0502229
ebi-a-GCST90002059	15	0.382	1.31562	0.72661-2.3821	0.673	1.12145	0.65848-1.90991	0.943	1.01488	0.67673-1.52201	0.697	1.20481	0.48150-3.01463	0.578	1.14309	0.72163-1.81071	-0.09387	0.26675	0.37	16.6986	14	0.2726	15.1313	13	0.29923	6.94766e-75	0.0503272
ebi-a-GCST90002095	21	0.795	1.08576	0.58944-2.0000	0.947	1.01336	0.68273-1.50413	0.945	1.01018	0.75872-1.34499	0.874	1.05234	0.56369-1.96456	0.954	1.01572	0.60432-1.70717	-0.02523	0.7961	0.776	14.6619	20	0.79541	14.5933	19	0.74807	4.46357e-143	0.0504798
ebi-a-GCST90001727	15	0.596	0.90262	0.62369-1.3063	0.545	0.89411	0.62227-1.28468	0.945	0.98998	0.74361-1.31799	0.791	0.90281	0.42968-1.89693	0.499	0.88394	0.62392-1.25233	0.05128	0.4528	0.675	11.3384	14	0.65927	10.7394	13	0.63264	3.14565e-77	0.0502426
ebi-a-GCST90001972	20	0.695	1.07662	0.74841-1.5488	0.953	1.01165	0.68808-1.48739	0.947	1.00976	0.75869-1.34390	0.342	1.35706	0.73449-2.50736	0.592	1.11202	0.75899-1.62925	-0.03149	0.58293	0.919	11.4208	19	0.90887	11.1082	18	0.88971	8.64887e-102	0.0501853
ebi-a-GCST90001438	15	0.475	1.29966	0.64644-2.6130	0.514	1.2356	0.65406-2.33423	0.947	1.01535	0.64637-1.59497	0.748	1.18892	0.42255-3.34527	0.551	1.24048	0.62134-2.47654	-0.06807	0.38025	0.587	12.549	14	0.5623	11.724	13	0.5504	1.46801e-76	0.0503048
ebi-a-GCST90001983	15	0.793	0.7642	0.10655-5.4807	0.301	0.67726	0.32360-1.41745	0.951	0.98073	0.52894-1.81840	0.24	0.48775	0.15488-1.53601	0.22	0.51014	0.18268-1.42459	0.04511	0.79715	0.126	20.7942	14	0.10702	20.6847	13	0.0794	2.08672e-81	0.0505183
ebi-a-GCST90002011	9	0.785	0.79515	0.16277-3.8843	0.717	0.85963	0.37955-1.94693	0.951	0.97941	0.50140-1.91317	0.751	0.81417	0.23838-2.78072	0.661	0.77576	0.25959-2.31822	0.03902	0.78456	0.939	2.98514	8	0.93529	2.90443	7	0.8937	3.05515e-49	0.0503556
ebi-a-GCST90002109	15	0.586	1.20896	0.62108-2.3533	0.758	0.93302	0.60007-1.45070	0.952	0.99054	0.72731-1.34905	0.755	1.11752	0.56434-2.21293	0.979	1.00707	0.60778-1.66868	-0.06956	0.51962	0.928	7.43589	14	0.9166	6.99781	13	0.90226	2.86662e-116	0.0503466
ebi-a-GCST90001835	14	0.413	1.38791	0.65054-2.9611	0.976	0.99044	0.52885-1.85489	0.952	1.01414	0.64214-1.60165	0.782	1.16427	0.40606-3.33822	0.923	1.03034	0.56966-1.86358	-0.09812	0.32903	0.711	10.7506	13	0.63171	9.71543	12	0.64091	1.3123e-72	0.0503081
ebi-a-GCST90001887	15	0.584	0.90748	0.64648-1.2739	0.685	0.93313	0.66810-1.30331	0.955	1.00766	0.77327-1.31309	0.307	0.74886	0.43898-1.27747	0.596	0.91623	0.66783-1.25702	0.07371	0.34906	0.299	17.1291	14	0.24937	15.9698	13	0.25076	6.40585e-112	0.0501322
ebi-a-GCST90001557	16	0.783	0.9006	0.43366-1.8703	0.497	0.82034	0.46332-1.45246	0.955	0.98819	0.65134-1.49925	0.494	0.72275	0.29150-1.79200	0.39	0.77428	0.43964-1.36364	0.03223	0.76397	0.532	14.6879	15	0.47413	14.5902	14	0.40673	6.57542e-83	0.0502083
ebi-a-GCST90001732	22	0.886	1.06322	0.46563-2.4278	0.929	1.02799	0.56115-1.88323	0.957	0.98797	0.63894-1.52765	0.88	0.92433	0.33809-2.52707	0.888	0.93516	0.37149-2.35413	-0.01547	0.83951	0.891	13.5956	21	0.88633	13.5535	20	0.85239	5.47444e-109	0.0502604
ebi-a-GCST90001562	29	0.483	0.9434	0.80335-1.1079	0.869	0.98291	0.80065-1.20667	0.959	0.99629	0.86516-1.14731	0.953	1.00988	0.73062-1.39588	0.672	0.96408	0.81535-1.13993	0.07363	0.17552	0.979	14.8782	28	0.97969	12.9427	27	0.98961	2.5525e-166	0.0500381
ebi-a-GCST90001583	22	0.904	1.01993	0.74305-1.4000	0.556	0.89871	0.62995-1.28214	0.962	0.9939	0.77005-1.28280	0.944	1.02707	0.48986-2.15341	0.652	0.92795	0.67342-1.27867	-0.01494	0.7806	0.431	22.0962	21	0.39398	22.0085	20	0.34005	6.16706e-116	0.0500719
ebi-a-GCST90001498	16	0.761	0.88883	0.42223-1.8711	0.72	0.89425	0.48535-1.64764	0.964	1.0103	0.64679-1.57812	0.848	0.91144	0.35890-2.31464	0.648	0.8355	0.39198-1.78083	0.0343	0.67994	0.889	9.72901	15	0.83643	9.55152	14	0.79418	9.44037e-87	0.0501641
ebi-a-GCST90001871	23	0.603	0.89285	0.58620-1.3599	0.803	1.04939	0.71785-1.53406	0.966	1.00508	0.79408-1.27214	0.254	0.67093	0.34408-1.30825	0.807	1.06887	0.63029-1.81264	0.04968	0.51036	0.383	22.6257	22	0.42312	22.1526	21	0.39076	2.0682e-155	0.0501494
ebi-a-GCST90001776	14	0.859	0.95436	0.57635-1.5803	0.766	1.09277	0.60903-1.96076	0.966	1.00809	0.69273-1.46702	0.817	0.89622	0.36133-2.22296	0.337	0.72408	0.38359-1.36682	0.0233	0.75558	0.681	7.93272	13	0.84796	7.83127	12	0.79817	2.40321e-70	0.0500806
ebi-a-GCST90001804	27	0.977	1.0088	0.56504-1.8011	0.678	0.91926	0.61780-1.36782	0.968	1.00691	0.71807-1.41194	0.555	0.81169	0.40989-1.60736	0.68	0.92093	0.62533-1.35625	-0.00062	0.99378	0.081	39.1804	26	0.04685	39.1803	25	0.03534	0	0.0502759
ebi-a-GCST90001407	14	0.711	1.10088	0.67043-1.8077	0.75	0.9284	0.58771-1.46659	0.97	0.99253	0.67288-1.46403	0.945	1.02548	0.50913-2.06550	0.813	0.95143	0.63532-1.42481	-0.05369	0.50759	0.241	18.0758	13	0.15466	17.3994	12	0.13518	9.74507e-73	0.0500692
ebi-a-GCST90001399	15	0.372	0.68324	0.30495-1.5308	0.758	1.09435	0.61728-1.94012	0.97	1.00831	0.65583-1.55022	0.252	0.59994	0.25961-1.38641	0.966	0.9865	0.53688-1.81266	0.10119	0.28392	0.63	12.3692	14	0.57668	11.1199	13	0.60078	1.73988e-131	0.050147
ebi-a-GCST90001531	21	0.782	0.97708	0.83072-1.1492	0.803	1.0243	0.84827-1.23686	0.97	1.00262	0.87429-1.14979	0.33	1.16897	0.86034-1.58831	0.982	1.00185	0.85867-1.16889	0.03314	0.56794	0.839	14.0436	20	0.82828	13.7058	19	0.80056	8.12867e-132	0.0500259
ebi-a-GCST90001393	14	0.679	1.35433	0.33333-5.5027	0.583	0.80369	0.36809-1.75475	0.973	0.98979	0.55106-1.77783	0.553	0.68311	0.20029-2.32988	0.617	0.74421	0.24044-2.30347	-0.05377	0.63591	0.397	14.2414	13	0.35707	13.9668	12	0.30284	3.03188e-71	0.0501261
ebi-a-GCST90001862	15	0.724	0.93255	0.63788-1.3634	0.448	0.86578	0.59652-1.25658	0.974	1.00471	0.75552-1.33610	0.622	0.88304	0.54412-1.43305	0.479	0.86401	0.58254-1.28147	0.04558	0.57046	0.967	6.32627	14	0.95759	5.98744	13	0.94661	6.54704e-75	0.0500343
ebi-a-GCST90002093	12	0.739	1.16474	0.48711-2.7850	0.52	1.1941	0.69560-2.04987	0.978	0.99286	0.60295-1.63490	0.671	1.20607	0.51942-2.80042	0.504	1.20607	0.70855-2.05292	-0.06559	0.6649	0.088	19.8416	11	0.04756	19.4541	10	0.03486	3.09739e-63	0.0501258
ebi-a-GCST90001805	20	0.875	0.9622	0.59864-1.5466	0.577	0.89495	0.60570-1.32233	0.978	1.00425	0.74736-1.34943	0.646	0.8644	0.46847-1.59497	0.559	0.89017	0.60675-1.30598	0.01723	0.82104	0.526	18.9966	19	0.45705	18.9412	18	0.39546	2.42169e-260	0.0500692
ebi-a-GCST90002104	14	0.494	1.13297	0.80087-1.6028	0.427	1.12195	0.84481-1.48999	0.978	0.99699	0.80345-1.23715	0.604	1.11087	0.75370-1.63729	0.67	1.06528	0.80198-1.41502	-0.08937	0.37269	0.511	13.0945	13	0.44054	12.2212	12	0.42808	2.53462e-282	0.0500445
ebi-a-GCST90002046	20	0.798	0.97337	0.79365-1.1938	0.494	0.91922	0.72204-1.17026	0.979	1.00224	0.84971-1.18215	0.537	1.14067	0.75692-1.71896	0.604	0.94442	0.76357-1.16812	0.03114	0.62512	0.309	21.5692	19	0.30622	21.2771	18	0.26566	1.58927e-120	0.0500196
ebi-a-GCST90001840	18	0.297	1.52832	0.70629-3.3071	0.22	1.42422	0.80965-2.50528	0.98	1.00506	0.67736-1.49131	0.267	1.88617	0.63882-5.56904	0.153	1.84262	0.82711-4.10495	-0.13565	0.23497	0.43	17.3262	17	0.43249	15.803	16	0.46679	1.03927e-98	0.0500518
ebi-a-GCST90001970	15	0.933	1.01327	0.74976-1.3694	0.993	0.99866	0.74536-1.33802	0.982	0.99743	0.79756-1.24739	0.879	1.03373	0.67916-1.57339	0.97	1.00466	0.78898-1.27929	-0.01417	0.87491	0.402	16.7801	14	0.26808	16.7469	13	0.21113	2.72445e-157	0.0500197
ebi-a-GCST90001478	15	0.706	0.87337	0.43852-1.7394	0.98	0.99314	0.57260-1.72253	0.985	0.99598	0.65982-1.50339	0.664	0.83291	0.37170-1.86640	0.88	0.95588	0.53669-1.70249	0.04402	0.64885	0.925	7.97667	14	0.89054	7.75941	13	0.85891	1.27698e-82	0.0500237
ebi-a-GCST90001686	19	0.522	1.42836	0.49081-4.1568	0.738	0.8837	0.42841-1.82286	0.989	1.00343	0.61433-1.63899	0.716	0.80165	0.24794-2.59188	0.897	0.941	0.37831-2.34066	-0.06758	0.47505	0.521	17.7346	18	0.47326	17.1948	17	0.44124	5.8452e-106	0.0500219
ebi-a-GCST90001814	14	0.599	0.95699	0.81571-1.1227	0.845	0.98213	0.81968-1.17678	0.989	0.99898	0.86298-1.15642	0.785	0.95307	0.67960-1.33657	0.802	0.97904	0.83268-1.15112	0.08929	0.21318	0.646	12.6953	13	0.47161	10.9669	12	0.53176	6.95966e-67	0.0500012
ebi-a-GCST90001758	27	0.179	1.3737	0.87554-2.1553	0.308	1.27945	0.79685-2.05433	0.99	1.00206	0.72796-1.37936	0.604	0.73816	0.23781-2.29123	0.22	1.33256	0.85177-2.08474	-0.09822	0.06874	0.313	27.31	26	0.39322	23.6918	25	0.53723	1.54443e-167	0.0500113
ebi-a-GCST90001627	33	0.446	1.14918	0.80724-1.6360	0.668	1.07795	0.76479-1.51934	0.99	1.00152	0.79014-1.26946	0.988	0.9957	0.56630-1.75070	0.42	1.14378	0.82848-1.57908	-0.05487	0.31149	0.297	35.8264	32	0.29352	34.6434	31	0.29815	8.93431e-261	0.0500091
ebi-a-GCST90001706	22	0.364	1.32833	0.72971-2.4181	0.552	0.87486	0.56302-1.35940	0.991	1.00185	0.73837-1.35936	0.517	0.75445	0.32647-1.74348	0.528	0.77607	0.35783-1.68315	-0.0982	0.29683	0.431	21.4621	21	0.43105	20.2976	20	0.43946	3.56966e-217	0.0500192
ebi-a-GCST90001998	24	0.88	1.03133	0.69521-1.5300	0.462	0.85277	0.55802-1.30321	0.992	0.99855	0.74889-1.33143	0.965	0.98255	0.45157-2.13787	0.887	1.03176	0.67457-1.57808	-0.01342	0.81659	0.629	19.7036	23	0.65972	19.6486	22	0.60501	6.95854e-124	0.0500043
ebi-a-GCST90001582	23	0.609	0.90425	0.61821-1.3226	0.554	0.8792	0.57423-1.34616	0.993	1.0014	0.73863-1.35766	0.9	1.05036	0.49204-2.24219	0.628	0.92108	0.66356-1.27854	0.05094	0.38604	0.221	28.7238	22	0.15292	27.6904	21	0.14915	1.48571e-125	0.0500041
ebi-a-GCST90001453	17	0.569	0.76115	0.30360-1.9082	0.768	0.91362	0.50064-1.66727	0.993	0.9981	0.64115-1.55378	0.361	1.6561	0.57856-4.74052	0.431	0.71122	0.31091-1.62693	0.07114	0.51959	0.705	12.5485	16	0.70544	12.1136	15	0.67041	1.3463e-86	0.0500062
ebi-a-GCST90001813	22	0.297	1.34593	0.78124-2.3188	0.426	1.23067	0.73826-2.05152	0.993	0.99847	0.69894-1.42637	0.468	1.41578	0.56298-3.56038	0.292	1.51935	0.71141-3.24484	-0.11694	0.17624	0.249	25.0017	21	0.24709	22.7643	20	0.30052	3.72557e-161	0.050006
ebi-a-GCST90001995	20	0.202	0.58463	0.26437-1.2928	0.784	0.93254	0.56536-1.53817	0.995	1.0012	0.70844-1.41495	0.521	0.73705	0.29526-1.83986	0.79	0.92713	0.53502-1.60661	0.15813	0.15715	0.559	17.7381	19	0.53999	15.5587	18	0.62331	4.65785e-170	0.0500039
ebi-a-GCST90001678	19	0.527	0.87865	0.59342-1.3010	0.856	0.96311	0.64137-1.44625	0.995	0.99893	0.73256-1.36217	0.223	1.53275	0.78955-2.97552	0.983	1.00366	0.71351-1.41180	0.0718	0.31225	0.358	21.6377	18	0.24847	20.34	17	0.25721	1.13792e-98	0.0500022
ebi-a-GCST90001788	16	0.86	1.10126	0.38418-3.1568	0.342	0.69963	0.33479-1.46202	0.996	0.9985	0.54649-1.82436	0.28	2.25681	0.54361-9.36920	0.402	0.70009	0.31149-1.57345	-0.02268	0.8244	0.082	23.2962	15	0.07805	23.2114	14	0.05692	1.62633e-77	0.050003
ebi-a-GCST90001520	21	0.441	1.11889	0.84578-1.4802	0.989	1.00207	0.74098-1.35517	0.997	0.99965	0.80741-1.23768	0.907	1.0236	0.69501-1.50754	0.784	1.0394	0.79150-1.36493	-0.07793	0.23685	0.719	16.8431	20	0.66314	15.3511	19	0.70004	9.58609e-135	0.0500005
ebi-a-GCST90001414	16	0.698	1.15741	0.56179-2.3845	0.272	1.43868	0.75152-2.75413	0.998	0.99947	0.63726-1.56757	0.182	0.489	0.17937-1.33314	0.283	1.46127	0.74976-2.84799	-0.04699	0.61908	0.934	7.64436	15	0.93725	7.38588	14	0.91881	2.52698e-78	0.0500004

## Sheet: Sheet1
ebi-a-GCST90001744
ebi-a-GCST90001886
ebi-a-GCST90001814
ebi-a-GCST90001474
ebi-a-GCST90001711
ebi-a-GCST90001937
ebi-a-GCST90001716
ebi-a-GCST90001457
ebi-a-GCST90001982
ebi-a-GCST90001701
ebi-a-GCST90001719
ebi-a-GCST90001416
ebi-a-GCST90001929
ebi-a-GCST90001437
ebi-a-GCST90001620
ebi-a-GCST90001713
ebi-a-GCST90001444
ebi-a-GCST90001884
ebi-a-GCST90002054
ebi-a-GCST90001898
ebi-a-GCST90001409
ebi-a-GCST90001720
ebi-a-GCST90001422
ebi-a-GCST90001659
ebi-a-GCST90001665
ebi-a-GCST90001786
ebi-a-GCST90001760
ebi-a-GCST90001858
ebi-a-GCST90001411
ebi-a-GCST90001547
ebi-a-GCST90001392
ebi-a-GCST90001584
ebi-a-GCST90001794
ebi-a-GCST90001559
ebi-a-GCST90001802
ebi-a-GCST90001679
ebi-a-GCST90002089
ebi-a-GCST90001809
ebi-a-GCST90001867
ebi-a-GCST90001404
ebi-a-GCST90001728
ebi-a-GCST90002088
ebi-a-GCST90001657
ebi-a-GCST90001641
ebi-a-GCST90001770
ebi-a-GCST90001796
ebi-a-GCST90001596
ebi-a-GCST90001527
ebi-a-GCST90001651
ebi-a-GCST90001979
ebi-a-GCST90001473
ebi-a-GCST90001519
