# Supplementary material for: Exploring Hepatocellular Carcinoma Etiology through Multi-omics Bioinformatics
Source: Research Square preprint supplement (doi:10.21203/rs.3.rs-6188338/v1), 2025-04-21
Supplement: Supplementary file 5 [file d2e3386ae7239318a48e6f8b.xlsx]

## Sheet: Content
Content
S7.1. The resluts of forward univariable MR analysis between gut microbiota and the risk of HCC in FinnGen database.
S7.2. The resluts of forward univariable MR analysis between gut microbiota phenotypes and the risk of HCC in UK Bio-Bank database.

## Sheet: S7.1
The resluts of forward univariable MR analysis between gut microbiota and the risk of HCC in FinnGen database.
id	nsnp	MR-Egger			Weighted median			Inverse variance weighted			Simple mode			Weighted mode			MR-Egger intercept		MR-PRESSO global	MR-IVW			MR-Egeer			steiger_test_pval	power
		p_value	OR	95% OR	p_value	OR	95% OR	p_value	OR	95% OR	p_value	OR	95% OR	p_value	OR	95% OR	egger intercept	p_value	p_value	Q	Q_df	Q_pval	Q	Q_df	Q_pval
ebi-a-GCST90027463	47	0.98	0.92349	0.00185-461.3800	0	2.37585	2.03635-2.77196	0	2.27879	2.04193-2.54313	0	2.46643	1.79991-3.37977	0	2.46643	1.79419-3.39054	0.20575	0.77699	1	2.98514	46	1	2.90395	45	1	5.20957e-231	1
ebi-a-GCST90027487	50	0.332	1.85707	0.53899-6.3985	0	2.20695	1.88705-2.58109	0	2.28618	2.03644-2.56656	0	2.14253	1.51500-3.02998	0	2.1367	1.50821-3.02708	0.04397	0.74222	1	11.694	49	1	11.5846	48	1	9.79264e-253	1
ebi-a-GCST90027842	166	0.002	0.5199	0.34795-0.7768	0	0.68066	0.63442-0.73028	0	0.68331	0.64678-0.72191	0.002	0.72893	0.59651-0.89074	0.003	0.72893	0.59404-0.89445	0.0518	0.17995	1	19.7242	165	1	17.9107	164	1	0	0.998269
ebi-a-GCST90027709	171	0.161	0.69145	0.41364-1.1558	0	0.68309	0.63747-0.73197	0	0.69422	0.65749-0.73300	0.001	0.68414	0.55338-0.84580	0	0.68414	0.55891-0.83742	0.00075	0.98777	1	21.8879	170	1	21.8877	169	1	0	0.997761
ebi-a-GCST90027489	66	0	0.13132	0.06787-0.2541	0	0.48072	0.41344-0.55894	0	0.56684	0.50915-0.63106	0	0.45496	0.30760-0.67291	0	0.45496	0.30371-0.68153	0.48259	4e-05	1	33.5521	65	0.99957	14.1823	64	1	0	0.989632
ebi-a-GCST90027644	17	0.005	31.5913	4.06454-245.5409	0	7.51876	4.42232-12.78328	0	6.9173	4.71647-10.14511	0	7.53677	3.15479-18.00525	0	7.53677	3.29951-17.21553	-0.21613	0.16016	1	2.24053	16	0.99998	0.05674	15	1	4.21528e-69	1
ebi-a-GCST90027522	16	0.222	4.22543	0.46237-38.6151	0	0.11788	0.06596-0.21067	0	0.16476	0.11216-0.24205	0.001	0.1165	0.04464-0.30406	0.001	0.1165	0.04191-0.32387	-0.27696	0.01122	0.768	13.18	15	0.58839	4.6623	14	0.98998	1.38295e-64	0.975261
ebi-a-GCST90027768	41	0.048	0.33063	0.11408-0.9583	0	1.83266	1.56799-2.14200	0	1.70314	1.51894-1.90968	0	1.82838	1.36849-2.44281	0	1.82838	1.34489-2.48569	0.28777	0.00425	1	16.4016	40	0.99966	7.17916	39	1	1.64703e-185	0.999601
ebi-a-GCST90027823	24	0.462	6.67878	0.04629-963.6421	0	0.42631	0.33345-0.54503	0	0.43823	0.36660-0.52384	0	0.42392	0.28282-0.63541	0.001	0.4245	0.27714-0.65022	-0.9921	0.29422	1	2.02057	23	1	0.86593	22	1	1.51865e-103	0.902654
ebi-a-GCST90027520	37	0.165	3.17927	0.64325-15.7135	0	1.87033	1.57354-2.22310	0	1.80759	1.58178-2.06563	0.001	1.87238	1.32164-2.65261	0.001	1.87238	1.34941-2.59803	-0.13111	0.49161	1	8.97673	36	1	8.49363	35	1	2.09311e-185	0.999981
ebi-a-GCST90027787	29	0.132	3.02205	0.74822-12.2060	0	0.41027	0.32331-0.52063	0	0.45758	0.38363-0.54579	0.001	0.40939	0.25980-0.64513	0.001	0.40939	0.26187-0.64003	-0.27093	0.01263	0.994	13.2713	28	0.9916	6.13281	27	0.99999	4.73064e-130	0.93735
ebi-a-GCST90027672	53	0	13.1513	5.25397-32.9193	0	3.45618	2.52443-4.73184	0	2.72226	2.17090-3.41365	0.001	3.46475	1.75162-6.85336	0.003	3.46475	1.58379-7.57957	-0.31882	0.00106	0.999	22.9181	52	0.99985	10.8644	51	1	9.42e-257	1
ebi-a-GCST90027615	35	0.165	2.16099	0.74544-6.2646	0	0.22492	0.15141-0.33410	0	0.27091	0.20146-0.36430	0	0.13567	0.05140-0.35809	0	0.13567	0.05090-0.36163	-0.1916	0.00038	0.335	40.8972	34	0.19341	25.268	33	0.83005	1.28993e-154	0.99924
ebi-a-GCST90027588	108	0	4.57347	2.57053-8.1371	0	2.22812	1.86101-2.66765	0	1.74397	1.53052-1.98719	0.001	2.37249	1.43899-3.91157	0.001	2.35828	1.45570-3.82049	-0.15229	0.00106	1	57.2916	107	0.99998	45.9527	106	1	0	1
ebi-a-GCST90027840	186	0	0.14519	0.08138-0.2591	0	0.73359	0.63292-0.85027	0	0.63332	0.56846-0.70559	0.197	0.7357	0.46207-1.17135	0.173	0.7357	0.47367-1.14267	0.15139	0	1	60.892	185	1	35.1332	184	1	0	0.999978
ebi-a-GCST90027637	31	0.298	7.60063	0.17871-323.2558	0	3.98762	2.70267-5.88347	0	3.17683	2.40956-4.18841	0.001	4.00565	1.94673-8.24216	0.002	4.00565	1.75822-9.12587	-0.10042	0.65096	1	11.5742	30	0.99901	11.3652	29	0.99862	2.86871e-142	1
ebi-a-GCST90027557	99	0	5.93212	2.71167-12.9773	0	1.47209	1.30912-1.65535	0	1.40764	1.29389-1.53139	0	1.78256	1.34524-2.36204	0	1.78987	1.38313-2.31622	-0.27054	0.00047	0.955	78.0143	98	0.93183	64.8907	97	0.99498	0	0.998673
ebi-a-GCST90027612	49	0.098	0.45492	0.18229-1.1353	0	0.53469	0.44746-0.63893	0	0.58771	0.51243-0.67406	0	0.54057	0.39198-0.74550	0	0.53252	0.38475-0.73704	0.03836	0.58142	1	22.9082	48	0.9992	22.6	47	0.99901	2.04102e-274	0.958006
ebi-a-GCST90027486	32	0.519	1.54577	0.41726-5.7265	0	0.56284	0.47054-0.67323	0	0.59097	0.51451-0.67880	0.003	0.5587	0.39435-0.79156	0.002	0.56196	0.40036-0.78879	-0.20067	0.15822	1	10.3839	31	0.99981	8.28955	30	0.99997	1.56785e-151	0.799945
ebi-a-GCST90027836	27	0.006	6.07239	1.89087-19.5011	0	4.63424	3.03624-7.07329	0	2.94263	2.16642-3.99696	0.001	4.67557	2.15082-10.16400	0.001	4.67557	2.03047-10.76645	-0.10645	0.21923	0.482	26.9843	26	0.41016	25.3725	25	0.44166	1.17754e-131	1
ebi-a-GCST90027478	270	0.012	0.25828	0.09068-0.7357	0	0.81	0.73820-0.88879	0	0.7761	0.72160-0.83470	0.173	0.82317	0.62278-1.08804	0.167	0.82317	0.62520-1.08382	0.12255	0.03987	1	13.8864	269	1	9.62165	268	1	0	0.992562
ebi-a-GCST90027465	27	0.033	5.66974	1.26165-25.4792	0	2.32586	1.69399-3.19342	0	2.27979	1.79608-2.89378	0.007	2.29736	1.31388-4.01702	0.004	2.28837	1.37677-3.80356	-0.12987	0.24004	1	6.78215	26	0.99994	5.33363	25	0.99999	2.01453e-133	1
ebi-a-GCST90027506	45	0.142	0.31766	0.07073-1.4267	0	0.4422	0.32673-0.59849	0	0.45488	0.36171-0.57205	0.013	0.44131	0.23794-0.81853	0.013	0.44131	0.23679-0.82249	0.03586	0.63786	1	4.79251	44	1	4.56778	43	1	1.69781e-213	0.991239
ebi-a-GCST90027689	35	0.005	2.91259	1.44583-5.8673	0	2.43104	1.77496-3.32964	0	2.29763	1.79862-2.93509	0.006	2.46219	1.33920-4.52686	0.004	2.46219	1.39528-4.34490	-0.04291	0.48365	1	0.81749	34	1	0.31562	33	1	9.60625e-165	1
ebi-a-GCST90027571	40	0.007	56.5278	3.56156-897.1889	0	0.31241	0.22053-0.44257	0	0.4293	0.33349-0.55264	0.001	0.31139	0.16063-0.60366	0.002	0.31139	0.15890-0.61019	-0.39633	0.00129	0.966	25.6757	39	0.9503	13.603	38	0.99991	8.2268e-199	0.993077
ebi-a-GCST90027620	19	0.524	8.0102	0.01518-4225.6418	0	2.27986	1.67384-3.10529	0	2.24074	1.75969-2.85330	0.007	2.27949	1.34789-3.85497	0.005	2.27949	1.37110-3.78971	-0.19585	0.69513	1	0.22767	18	1	0.06876	17	1	1.38868e-83	0.999995
ebi-a-GCST90027595	95	0	0.02713	0.00723-0.1018	0	2.01057	1.58997-2.54243	0	1.78571	1.49872-2.12765	0.009	2.00192	1.19820-3.34474	0.008	2.00192	1.20925-3.31420	0.42374	0	1	44.3684	94	1	5.17083	93	1	0	1
ebi-a-GCST90027494	21	0.321	2.60789	0.41250-16.4874	0	2.01538	1.57222-2.58346	0	1.91338	1.56850-2.33409	0.003	2.05544	1.35154-3.12595	0.004	2.05156	1.33619-3.14992	-0.0663	0.74422	1	2.90983	20	1	2.80023	19	0.99999	5.59354e-118	0.999817
ebi-a-GCST90027758	38	0.021	2.34863	1.17434-4.6972	0	2.32732	1.72063-3.14792	0	2.09038	1.65678-2.63747	0.004	2.48162	1.38142-4.45804	0.004	2.48162	1.38383-4.45028	-0.02132	0.72864	1	4.99368	37	1	4.87142	36	1	1.13052e-177	1
ebi-a-GCST90027666	17	0.348	31.632	0.02931-34135.6676	0	4.03662	2.33402-6.98119	0	3.59509	2.38448-5.42033	0.01	4.00393	1.57878-10.15430	0.007	4.00393	1.64960-9.71839	-0.25119	0.55012	1	3.7076	16	0.99932	3.33385	15	0.99923	2.0858e-72	1
ebi-a-GCST90027579	49	0.435	1.77679	0.42492-7.4296	0	1.84863	1.34790-2.53538	0	2.01517	1.60934-2.52333	0.003	3.35034	1.56324-7.18045	0.002	3.35034	1.63175-6.87899	0.01268	0.86211	0.99	28.6263	48	0.98812	28.5958	47	0.98435	1.08737e-233	1
ebi-a-GCST90027649	19	0.146	0.08266	0.00335-2.0422	0	3.5803	2.13667-5.99933	0	3.1233	2.12480-4.59101	0.007	3.58518	1.57488-8.16158	0.008	3.58518	1.55611-8.26001	0.36506	0.03906	0.999	5.25091	18	0.99841	0.25192	17	1	8.8217e-85	1
ebi-a-GCST90027592	90	0.161	2.28337	0.72630-7.1786	0	0.49305	0.38687-0.62837	0	0.58637	0.48922-0.70280	0.012	0.49133	0.28628-0.84326	0.006	0.49133	0.29934-0.80646	-0.11948	0.0207	1	33.8962	89	1	28.3462	88	1	0	0.995907
ebi-a-GCST90027770	23	0.002	0.09617	0.02643-0.3499	0	0.39496	0.28768-0.54226	0	0.5128	0.40648-0.64693	0.007	0.35871	0.18368-0.70054	0.005	0.35871	0.18889-0.68118	0.25317	0.01738	0.952	12.8856	22	0.9363	6.21828	21	0.99924	4.17494e-104	0.795522
ebi-a-GCST90027835	23	0.504	0.275	0.00666-11.3487	0	2.4054	1.67450-3.45532	0	2.25246	1.69735-2.98912	0.013	2.407	1.26991-4.56224	0.008	2.407	1.32863-4.36061	0.20439	0.27903	1	3.05256	22	1	1.81773	21	1	1.09514e-106	1
ebi-a-GCST90027759	14	0.826	0.56221	0.00365-86.5565	0	4.16306	2.27151-7.62978	0	3.40238	2.21593-5.22408	0.004	5.20415	2.05078-13.20632	0.009	5.07749	1.80097-14.31507	0.18217	0.49538	0.92	7.54992	13	0.87164	7.05549	12	0.85392	1.2575e-61	1
ebi-a-GCST90027679	34	0	4.79523	2.23143-10.3047	0	2.4346	1.78479-3.32100	0	1.89763	1.51475-2.37730	0.007	2.67302	1.36891-5.21953	0.006	2.67302	1.37751-5.18693	-0.13609	0.01835	0.971	19.4849	33	0.9701	13.3074	32	0.99853	8.47405e-169	0.999996
ebi-a-GCST90027484	22	0.219	2.19685	0.65143-7.4085	0	2.70108	1.78914-4.07785	0	2.26449	1.67508-3.06129	0.014	2.81638	1.32693-5.97770	0.008	2.81638	1.41569-5.60291	0.00363	0.96024	0.824	16.0778	21	0.76526	16.0753	20	0.71194	9.60729e-102	1
ebi-a-GCST90027609	46	0.174	0.1403	0.00864-2.2786	0	2.02294	1.48759-2.75093	0	1.90764	1.50046-2.42531	0.03	1.9996	1.08888-3.67202	0.037	1.99184	1.06418-3.72816	0.20898	0.07224	1	6.4757	45	1	3.08308	44	1	1.12599e-233	1
ebi-a-GCST90027711	47	0.001	0.00772	0.00047-0.1280	0	0.48194	0.35455-0.65511	0	0.55198	0.44094-0.69097	0.011	0.38876	0.19266-0.78447	0.012	0.38876	0.19146-0.78937	0.3873	0.00451	1	17.0188	46	0.99997	8.08044	45	1	1.51412e-243	0.964824
ebi-a-GCST90027622	41	0.002	7.97007	2.36625-26.8450	0	2.26736	1.64851-3.11852	0	1.82262	1.44006-2.30680	0.004	2.72676	1.43273-5.18953	0.007	2.66464	1.35946-5.22290	-0.2036	0.01992	0.997	19.4926	40	0.99739	13.6002	39	0.99995	1.82029e-210	0.999997
ebi-a-GCST90027558	50	0.06	1.89167	0.98978-3.6154	0.011	0.7319	0.57559-0.93066	0	0.64935	0.54793-0.76954	0.312	0.74482	0.42299-1.31151	0.322	0.74214	0.41394-1.33055	-0.15793	0.00157	0.993	29.0503	49	0.98957	17.8094	48	0.99998	3.56438e-237	0.832451
ebi-a-GCST90027536	60	0.011	0.32689	0.14131-0.7562	0.002	0.69256	0.54769-0.87575	0	0.64901	0.54699-0.77006	0.801	1.08039	0.59468-1.96284	0.815	1.07416	0.59202-1.94892	0.07365	0.10701	0.996	32.7201	59	0.99783	30.0397	58	0.99912	1.1289e-297	0.898756
ebi-a-GCST90027802	53	0.146	0.09938	0.00465-2.1262	0	0.493	0.36599-0.66407	0	0.55421	0.43848-0.70049	0.037	0.4934	0.25868-0.94112	0.038	0.4934	0.25719-0.94654	0.16182	0.27525	1	9.58234	52	1	8.36596	51	1	1.14522e-252	0.967115
ebi-a-GCST90027822	27	0.222	99.5235	0.07461-132764.5847	0	1.46262	1.21392-1.76226	0	1.41635	1.22765-1.63406	0.027	1.46252	1.06371-2.01085	0.022	1.46252	1.07608-1.98774	-0.72096	0.25763	1	2.4023	26	1	1.06028	25	1	3.56921e-139	0.76825
ebi-a-GCST90027473	27	0.039	0.25426	0.07422-0.8710	0.001	0.50206	0.33225-0.75865	0	0.46408	0.33730-0.63852	0.086	0.50321	0.23657-1.07041	0.048	0.50321	0.26298-0.96289	0.05705	0.33086	1	3.75119	26	1	2.76778	25	1	3.03561e-132	0.923957
ebi-a-GCST90027857	12	0.106	0.14969	0.01838-1.2188	0	0.32525	0.21939-0.48220	0	0.45064	0.32095-0.63273	0.006	0.31016	0.15686-0.61330	0.011	0.31132	0.14653-0.66142	0.16584	0.32121	0.205	16.4433	11	0.12546	14.8281	10	0.13846	4.63098e-53	0.631103
ebi-a-GCST90027461	33	0.055	5.65887	1.02792-31.1532	0	0.37231	0.25257-0.54882	0	0.51232	0.38288-0.68551	0.023	0.36391	0.15833-0.83643	0.024	0.36391	0.15784-0.83902	-0.19502	0.00869	0.994	15.3667	32	0.99426	7.51941	31	1	3.31719e-155	0.916123
ebi-a-GCST90027808	42	0.02	0.26447	0.09007-0.7765	0	1.53074	1.26675-1.84976	0	1.38588	1.20224-1.59758	0.034	1.53135	1.04736-2.23901	0.037	1.53135	1.03966-2.25559	0.23574	0.00415	1	11.7138	41	1	2.46809	40	1	5.04739e-193	0.828844
ebi-a-GCST90027565	34	0.157	5.71793	0.53933-60.6209	0	0.46798	0.32659-0.67059	0	0.53454	0.40618-0.70346	0.045	0.4602	0.22194-0.95423	0.039	0.4574	0.22385-0.93462	-0.22556	0.05626	1	10.1367	33	0.99996	6.21293	32	1	4.20208e-161	0.89866
ebi-a-GCST90027551	24	0.11	0.64992	0.39161-1.0786	0	0.648	0.53996-0.77765	0	0.73724	0.64198-0.84663	0.016	0.64013	0.45676-0.89713	0.015	0.63779	0.45574-0.89257	0.03177	0.61718	0.969	12.5767	23	0.96058	12.3197	22	0.95042	1.48927e-120	0.358403
ebi-a-GCST90027670	38	0.002	0.22371	0.09109-0.5494	0.528	1.08735	0.83815-1.41066	0	1.4875	1.24041-1.78380	0.015	2.51391	1.24078-5.09335	0.023	2.51391	1.17134-5.39530	0.24686	0.00016	0.429	38.4109	37	0.40542	20.6304	36	0.98123	8.80237e-173	0.941619
ebi-a-GCST90027636	11	0.632	112.956	0.00000-15066574388.0000	0	2.399	1.53067-3.75992	0	2.07006	1.48337-2.88879	0.038	2.40307	1.17005-4.93545	0.037	2.40307	1.17427-4.91773	-0.71638	0.685	0.991	2.48831	10	0.99104	2.3127	9	0.9855	4.49331e-52	0.990959
ebi-a-GCST90027817	69	0	0.03421	0.01040-0.1125	0	1.8202	1.47644-2.24400	0	1.38194	1.18951-1.60550	0.011	1.83762	1.16518-2.89813	0.017	1.83762	1.13019-2.98786	0.42307	0	0.917	53.4655	68	0.90145	15.7696	67	1	0	0.98234
ebi-a-GCST90027550	93	0	0.20079	0.09100-0.4430	0.011	0.77529	0.63641-0.94447	0	0.7274	0.62710-0.84374	0.395	0.79324	0.46613-1.34990	0.405	0.79324	0.46125-1.36419	0.20155	0.00164	1	31.5343	92	1	20.9993	91	1	0	0.878837
ebi-a-GCST90027492	19	0.021	97.97	2.81896-3404.8459	0	2.59254	1.54296-4.35606	0	2.1988	1.52051-3.17966	0.009	3.53997	1.50924-8.30310	0.01	3.05327	1.42659-6.53478	-0.3902	0.05014	0.512	18.4947	18	0.42354	14.0495	17	0.6636	1.11959e-85	0.99999
ebi-a-GCST90027471	40	0.015	0.076	0.01045-0.5527	0	2.09557	1.48024-2.96668	0	1.73659	1.34099-2.24890	0.025	2.16416	1.13048-4.14300	0.035	2.17469	1.08511-4.35831	0.25924	0.00347	1	16.446	39	0.99943	6.72637	38	1	2.35621e-197	0.99987
ebi-a-GCST90027847	38	0.094	0.33242	0.09473-1.1665	0.002	0.61926	0.45743-0.83834	0	0.61077	0.48396-0.77080	0.094	0.6185	0.35780-1.06916	0.104	0.6185	0.35152-1.08827	0.05674	0.34023	1	1.41767	37	1	0.48349	36	1	9.2592e-186	0.818426
ebi-a-GCST90027454	18	0.127	0.17733	0.02152-1.4610	0.001	0.4032	0.23851-0.68163	0	0.43963	0.29719-0.65036	0.049	0.38851	0.16219-0.93064	0.051	0.38851	0.16085-0.93835	0.10775	0.40314	0.968	8.38015	17	0.95773	7.64262	16	0.9588	4.60798e-82	0.808621
ebi-a-GCST90027764	89	0.866	0.95207	0.53863-1.6829	0.001	1.3043	1.11953-1.51956	0	1.26868	1.13228-1.42150	0.132	1.36313	0.91439-2.03210	0.096	1.37444	0.94911-1.99038	0.04572	0.31618	1	31.9091	88	1	30.8927	87	1	0	0.867451
ebi-a-GCST90027698	12	0.795	1.72594	0.03147-94.6505	0	3.40931	1.83363-6.33900	0	2.72426	1.68671-4.40004	0.018	3.53752	1.44323-8.67087	0.023	3.53752	1.38306-9.04805	0.04787	0.8265	0.954	4.80716	11	0.94014	4.75653	10	0.90684	3.62651e-53	1
ebi-a-GCST90027688	313	0.028	1.79982	1.06734-3.0350	0.008	0.89306	0.82117-0.97126	0	0.87517	0.82001-0.93405	0.386	0.88595	0.67399-1.16456	0.786	0.96414	0.74109-1.25433	-0.09798	0.00678	1	56.4865	312	1	49.0564	311	1	NA	0.904733
ebi-a-GCST90027736	314	0.032	1.7745	1.05225-2.9925	0.007	0.89385	0.82351-0.97019	0	0.8768	0.82195-0.93531	0.337	0.87974	0.67742-1.14249	0.759	0.96283	0.75587-1.22646	-0.09655	0.00811	1	55.8068	313	1	48.7071	312	1	NA	0.901064
ebi-a-GCST90027662	314	0.032	1.77435	1.05248-2.9914	0.007	0.89385	0.82353-0.97018	0	0.87683	0.82198-0.93533	0.335	0.87964	0.67794-1.14136	0.758	0.96274	0.75619-1.22571	-0.09655	0.00808	1	55.8089	313	1	48.7031	312	1	NA	0.901033
ebi-a-GCST90027498	22	0.453	0.34052	0.02160-5.3680	0	0.32847	0.20791-0.51894	0	0.48703	0.34180-0.69398	0.007	0.32574	0.15637-0.67854	0.005	0.32574	0.16133-0.65770	0.03783	0.80014	0.364	23.7675	21	0.30446	23.6895	20	0.25622	1.33531e-99	0.818392
ebi-a-GCST90027696	87	0.908	0.96652	0.54328-1.7195	0.001	1.31264	1.12595-1.53030	0	1.25964	1.12327-1.41256	0.125	1.36523	0.92038-2.02508	0.101	1.37077	0.94363-1.99127	0.04221	0.36039	1	29.8909	86	1	29.0452	85	1	0	0.837301
ebi-a-GCST90027569	4	0.472	0	0.00000-38571300000000.0000	0.004	0.22054	0.07801-0.62348	0	0.20243	0.09132-0.44873	0.157	0.28083	0.07446-1.05924	0.162	0.28223	0.07362-1.08194	1.93264	0.49619	0.879	0.83346	3	0.84145	0.15311	2	0.9263	1.29035e-18	0.488724
ebi-a-GCST90027723	19	0.136	0.04502	0.00093-2.1848	0.009	0.66677	0.49134-0.90485	0	0.61607	0.48324-0.78541	0.146	0.67556	0.40732-1.12046	0.131	0.67556	0.41534-1.09883	0.36893	0.20321	1	3.52048	18	0.99991	1.76892	17	1	2.9764e-99	0.560763
ebi-a-GCST90027651	257	0.001	2.86465	1.52940-5.3657	0.084	0.91153	0.82074-1.01237	0	0.858	0.79449-0.92660	0.864	0.97295	0.71050-1.33233	0.908	0.98319	0.73722-1.31122	-0.14946	0.00019	1	57.6731	256	1	43.2799	255	1	NA	0.89862
ebi-a-GCST90027748	257	0.001	2.86522	1.52960-5.3671	0.084	0.91154	0.82074-1.01239	0	0.858	0.79448-0.92659	0.865	0.97301	0.71054-1.33243	0.909	0.98325	0.73729-1.31125	-0.14948	0.00019	1	57.6732	256	1	43.278	255	1	NA	0.898616
ebi-a-GCST90027485	9	0.893	4.04422	0.00000-1305603600.0000	0.003	0.35168	0.17640-0.70110	0	0.3578	0.20981-0.61019	0.06	0.33753	0.12782-0.89132	0.057	0.34216	0.13294-0.88067	-0.19902	0.8152	1	0.28188	8	0.99999	0.22298	7	0.99996	1.54696e-41	0.637405
ebi-a-GCST90027469	20	0.626	1.55274	0.27339-8.8190	0.024	0.54545	0.32229-0.92314	0	0.48264	0.32977-0.70637	0.267	0.57761	0.22557-1.47910	0.216	0.58299	0.25519-1.33187	-0.11656	0.19372	0.428	20.4256	19	0.36939	18.5474	18	0.42017	1.15451e-89	0.783911
ebi-a-GCST90027790	38	0.035	8.66812	1.25471-59.8834	0	0.45736	0.34121-0.61306	0	0.66246	0.53324-0.82298	0.01	0.44959	0.25337-0.79776	0.006	0.44959	0.26136-0.77336	-0.2799	0.01266	0.898	26.8567	37	0.89042	19.9698	36	0.98591	1.00131e-190	0.720013
ebi-a-GCST90027476	15	0.862	1.24135	0.11358-13.5675	0.002	2.3201	1.34633-3.99818	0	2.24054	1.45138-3.45880	0.067	2.36799	1.00952-5.55451	0.078	2.36303	0.97258-5.74136	0.05315	0.63082	1	0.65507	14	1	0.41285	13	1	3.60736e-70	0.999924
ebi-a-GCST90027606	16	0.001	5.63253	2.49006-12.7408	0.016	1.41001	1.06562-1.86572	0	1.50871	1.20397-1.89060	0.013	2.15209	1.26490-3.66157	0.017	2.1284	1.22233-3.70611	-0.34262	0.00583	0.151	22.0873	15	0.10554	11.5342	14	0.64365	4.94391e-69	0.666659
ebi-a-GCST90027600	32	0.64	0.82024	0.36037-1.8670	0.001	1.57751	1.21640-2.04581	0	1.41337	1.16635-1.71270	0.035	1.59783	1.05269-2.42528	0.021	1.58719	1.09292-2.30500	0.08222	0.19237	0.68	27.9658	31	0.62293	26.1873	30	0.66554	2.38807e-156	0.811035
ebi-a-GCST90027713	25	0	0.04456	0.01020-0.1948	0	0.35966	0.23529-0.54977	0	0.59557	0.44502-0.79704	0.036	0.35667	0.14384-0.88440	0.018	0.35111	0.15698-0.78531	0.27973	0.00186	0.594	22.0859	24	0.57414	9.73182	23	0.99282	4.4598e-122	0.697338
ebi-a-GCST90027707	24	0.373	14.2741	0.04623-4407.6390	0.012	0.58332	0.38316-0.88806	0.001	0.55356	0.39627-0.77327	0.285	0.66105	0.31494-1.38752	0.341	0.67061	0.29958-1.50116	-0.25724	0.27772	1	4.46878	23	0.99999	3.22997	22	1	1.32701e-114	0.747117
ebi-a-GCST90027750	15	0.011	69.9576	4.22980-1157.0469	0.403	0.76718	0.41246-1.42695	0.001	0.40987	0.24693-0.68031	0.992	1.00616	0.30925-3.27361	0.995	0.99653	0.32421-3.06308	-0.4776	0.00305	0.132	21.3538	14	0.0929	8.18033	13	0.83166	2.67494e-68	0.788714
ebi-a-GCST90027838	10	0.001	0.01764	0.00333-0.0935	0	0.24713	0.13368-0.45687	0.001	0.36622	0.20671-0.64880	0.01	0.24089	0.10186-0.56971	0.005	0.24089	0.11357-0.51095	0.3902	0.00616	0.117	16.1907	9	0.06301	2.60016	8	0.9569	2.14749e-42	0.655843
ebi-a-GCST90027499	8	0.295	0.04231	0.00019-9.3685	0.039	1.80505	1.02921-3.16574	0.001	2.05348	1.36311-3.09349	0.169	1.81436	0.84658-3.88847	0.152	1.78395	0.88064-3.61382	0.71627	0.20733	0.626	6.12186	7	0.52559	4.12484	6	0.65979	1.26354e-35	0.941276
ebi-a-GCST90027452	8	0.031	0.03031	0.00265-0.3467	0.205	0.72894	0.44718-1.18821	0.001	0.55054	0.39040-0.77635	0.023	0.34688	0.16991-0.70815	0.555	0.7989	0.39294-1.62427	0.54544	0.05663	0.576	6.05153	7	0.53375	0.50299	6	0.9978	5.48712e-35	0.320425
ebi-a-GCST90027521	25	0.035	0.30571	0.10866-0.8601	0.044	0.76291	0.58620-0.99287	0.001	0.70675	0.57847-0.86348	0.409	0.79041	0.45645-1.36871	0.422	0.80315	0.47465-1.35901	0.12776	0.11917	0.997	9.19789	24	0.99714	6.57805	23	0.99968	1.82385e-117	0.416738
ebi-a-GCST90027642	40	0.227	2.51721	0.57648-10.9914	0.008	1.5598	1.12237-2.16772	0.001	1.54868	1.20130-1.99651	0.244	1.49829	0.76697-2.92695	0.233	1.49141	0.78076-2.84889	-0.04156	0.51595	1	6.73581	39	1	6.30583	38	1	3.86907e-190	0.983052
ebi-a-GCST90027504	18	0.082	0.11622	0.01197-1.1288	0	0.28982	0.17243-0.48713	0.001	0.50791	0.34224-0.75380	0.014	0.26288	0.10109-0.68359	0.017	0.26586	0.09914-0.71299	0.15844	0.21525	0.218	22.4873	17	0.1667	20.3677	16	0.20412	1.70654e-86	0.729179
ebi-a-GCST90027554	19	0.11	0.23903	0.04534-1.2601	0.219	0.71125	0.41295-1.22501	0.001	0.50467	0.33766-0.75427	0.391	0.68205	0.29035-1.60217	0.329	0.68205	0.32294-1.44049	0.0697	0.37655	1	5.98458	18	0.99626	5.16004	17	0.99728	6.19655e-88	0.729204
ebi-a-GCST90027553	37	0.004	7.5478	2.05534-27.7176	0.028	1.48657	1.04395-2.11686	0.001	1.55447	1.19723-2.01831	0.263	1.48711	0.75077-2.94563	0.129	1.72221	0.86763-3.41852	-0.18964	0.02035	1	12.4754	36	0.99991	6.56896	35	1	4.0332e-177	0.979525
ebi-a-GCST90027625	47	0.654	0.61619	0.07532-5.0408	0.025	0.70656	0.52157-0.95715	0.001	0.67023	0.52804-0.85071	0.498	0.79744	0.41654-1.52664	0.448	0.78609	0.42447-1.45577	0.0071	0.93746	1	11.7327	46	1	11.7264	45	1	2.52959e-245	0.788626
ebi-a-GCST90027673	23	0.43	10.9727	0.03210-3750.4449	0.017	0.5854	0.37765-0.90742	0.001	0.56551	0.40207-0.79539	0.317	0.66046	0.29843-1.46167	0.325	0.66995	0.30712-1.46144	-0.23527	0.32967	1	4.07835	22	0.99999	3.08246	21	1	4.06675e-110	0.706743
ebi-a-GCST90027514	17	0.004	0.08194	0.01903-0.3529	0.453	0.82003	0.48857-1.37638	0.001	0.55315	0.38647-0.79171	0.023	0.26332	0.09285-0.74678	0.855	0.9174	0.36936-2.27861	0.30875	0.01846	0.468	16.2956	16	0.43253	9.31215	15	0.86064	8.27902e-76	0.586142
ebi-a-GCST90027639	113	0.607	1.25436	0.53067-2.9649	0	0.68995	0.56157-0.84769	0.001	0.78184	0.67272-0.90866	0.081	0.64225	0.39242-1.05112	0.063	0.64516	0.40819-1.01970	-0.03988	0.27636	1	22.3711	112	1	21.1744	111	1	0	0.794688
ebi-a-GCST90027525	20	0.006	0.13382	0.03770-0.4750	0.049	0.61571	0.37973-0.99833	0.001	0.55844	0.39043-0.79873	0.24	0.60823	0.27246-1.35778	0.28	0.60823	0.25314-1.46142	0.15423	0.03333	0.774	14.5505	19	0.75071	9.24038	18	0.95391	2.36993e-93	0.659548
ebi-a-GCST90027628	12	0.994	0.99135	0.11309-8.6904	0.004	2.4259	1.31710-4.46815	0.002	2.17776	1.34468-3.52696	0.076	2.50771	0.99946-6.29199	0.091	2.50771	0.94665-6.64305	0.08387	0.48289	1	0.70161	11	0.99999	0.17057	10	1	7.57599e-62	0.999192
ebi-a-GCST90027480	17	0.499	0.59376	0.13586-2.5950	0	0.33644	0.19717-0.57409	0.002	0.52789	0.35469-0.78566	0.045	0.3149	0.11093-0.89396	0.034	0.31305	0.11719-0.83620	-0.01292	0.87325	0.801	11.759	16	0.7604	11.7327	15	0.69914	5.10487e-81	0.657264
ebi-a-GCST90027829	13	0.001	6.04987	2.63010-13.9162	0.001	1.90657	1.29636-2.80401	0.002	1.57587	1.18695-2.09223	0.094	1.94352	0.95020-3.97524	0.169	1.94352	0.79887-4.72822	-0.36762	0.0065	0.349	13.084	12	0.36296	1.87555	11	0.99889	1.67054e-57	0.6875
ebi-a-GCST90027451	10	0.006	0	0.00000-0.0025	0	0.23188	0.11647-0.46168	0.002	0.32387	0.15970-0.65682	0.009	0.21306	0.08512-0.53332	0.008	0.21738	0.09089-0.51988	1.09491	0.00892	0.056	18.5256	9	0.02954	6.74337	8	0.56456	2.13733e-45	0.740638
ebi-a-GCST90027586	12	0.2	0.267	0.04040-1.7643	0.026	0.49568	0.26732-0.91909	0.002	0.46006	0.28169-0.75137	0.166	0.45952	0.16435-1.28477	0.371	0.62249	0.22991-1.68545	0.06635	0.5716	0.997	2.45786	11	0.99613	2.11579	10	0.99537	1.67909e-58	0.629246
ebi-a-GCST90027757	124	0.14	3.46029	0.67297-17.7923	0.143	0.89316	0.76788-1.03888	0.002	0.83013	0.73777-0.93405	0.984	0.99623	0.68188-1.45549	0.994	1.00156	0.67426-1.48772	-0.15693	0.08921	1	35.6406	123	1	32.7055	122	1	0	0.640223
ebi-a-GCST90027479	78	0.979	1.02444	0.17008-6.1706	0.005	1.43504	1.11615-1.84505	0.002	1.34145	1.11198-1.61827	0.23	1.44793	0.79518-2.63651	0.216	1.44793	0.80944-2.59007	0.02113	0.76811	1	29.8345	77	1	29.7469	76	1	0	0.943123
ebi-a-GCST90027477	24	0.105	0.20349	0.03218-1.2866	0.025	0.77494	0.61994-0.96870	0.002	0.75753	0.63426-0.90476	0.196	0.76719	0.51944-1.13310	0.182	0.76899	0.52919-1.11748	0.22799	0.17442	1	3.3989	23	1	1.42902	22	1	2.55955e-111	0.288633
ebi-a-GCST90027783	15	0.262	0.35614	0.06352-1.9967	0.006	0.71646	0.56383-0.91042	0.002	0.74705	0.61932-0.90111	0.098	0.7145	0.49287-1.03579	0.095	0.71899	0.50089-1.03206	0.17893	0.41217	0.99	4.99773	14	0.98584	4.27988	13	0.98783	3.93644e-68	0.212027
ebi-a-GCST90027507	43	0.546	1.92193	0.23516-15.7080	0.085	1.39949	0.95442-2.05210	0.002	1.62511	1.18931-2.22059	0.021	4.15104	1.30247-13.22960	0.022	4.15104	1.28864-13.37157	-0.01797	0.87499	0.005	72.3657	42	0.00247	72.3215	41	0.00182	3.72271e-214	0.998893
ebi-a-GCST90027720	32	0.084	3.19985	0.89468-11.4443	0	1.56162	1.24729-1.95515	0.002	1.31162	1.10137-1.56201	0.072	1.57176	0.97739-2.52759	0.061	1.57176	0.99587-2.48067	-0.12209	0.17635	1	12.8508	31	0.99833	10.9333	30	0.99944	4.2906e-161	0.576679
ebi-a-GCST90027650	17	0.167	6.10484	0.53212-70.0395	0.095	1.60338	0.92081-2.79193	0.003	1.89966	1.25102-2.88460	0.757	1.17034	0.43984-3.11406	0.751	1.18056	0.43155-3.22960	-0.107	0.35628	0.858	10.5205	16	0.83807	9.61454	15	0.84326	1.57189e-80	0.994102
ebi-a-GCST90027457	8	0.696	1.48661	0.22285-9.9172	0.011	0.38674	0.18647-0.80208	0.003	0.43151	0.24852-0.74925	0.062	0.28236	0.09222-0.86458	0.042	0.28529	0.10569-0.77012	-0.12726	0.23023	0.888	2.85204	7	0.89834	1.06927	6	0.98285	3.29008e-38	0.498056
ebi-a-GCST90027776	23	0.881	0.79624	0.04185-15.1487	0.009	0.61905	0.43160-0.88791	0.003	0.65196	0.49229-0.86341	0.04	0.46443	0.23340-0.92415	0.854	0.94122	0.49736-1.78121	-0.02309	0.89497	1	5.85136	22	0.99976	5.8335	21	0.99954	1.35877e-113	0.529902
ebi-a-GCST90027754	283	0.866	1.03968	0.66189-1.6331	0.134	0.93244	0.85091-1.02178	0.003	0.89946	0.83871-0.96461	0.972	0.99485	0.74314-1.33182	0.933	0.98841	0.75228-1.29865	-0.01837	0.52496	1	68.796	282	1	68.3909	281	1	NA	0.629438
ebi-a-GCST90027546	42	0.415	0.55528	0.13679-2.2541	0	0.51094	0.37017-0.70525	0.003	0.68489	0.53288-0.88027	0.084	0.48486	0.21733-1.08173	0.072	0.48486	0.22473-1.04610	0.02034	0.76701	0.999	18.3249	41	0.99915	18.2359	40	0.99877	2.47406e-215	0.703263
ebi-a-GCST90027844	20	0.419	0.46655	0.07664-2.8401	0.022	1.55317	1.06409-2.26704	0.003	1.54901	1.15810-2.07186	0.044	2.18141	1.07261-4.43641	0.26	1.49523	0.75810-2.94910	0.12816	0.20358	0.997	6.26951	19	0.99721	4.52876	18	0.99942	7.28953e-96	0.840915
ebi-a-GCST90027781	9	0.701	1.51082	0.19985-11.4214	0.011	0.51112	0.30411-0.85906	0.003	0.58365	0.40732-0.83631	0.054	0.37211	0.15773-0.87784	0.049	0.38236	0.16976-0.86121	-0.17901	0.38008	0.504	8.03417	8	0.43014	7.13926	7	0.41453	4.6196e-42	0.327141
ebi-a-GCST90027769	43	0.798	1.1035	0.52073-2.3385	0.015	0.69431	0.51688-0.93265	0.004	0.71538	0.57128-0.89585	0.065	0.5649	0.31306-1.01934	0.091	0.57732	0.31007-1.07490	-0.05308	0.24261	1	12.461	42	1	11.0553	41	1	3.34873e-220	0.621331
ebi-a-GCST90027618	17	0.996	1.0071	0.08841-11.4720	0.014	0.47719	0.26381-0.86317	0.004	0.52047	0.33368-0.81183	0.165	0.45648	0.15883-1.31190	0.163	0.45953	0.16228-1.30121	-0.06095	0.59652	0.931	9.17233	16	0.90615	8.87975	15	0.88372	1.37961e-79	0.660268
ebi-a-GCST90027785	52	0.014	8.85475	1.63848-47.8534	0.005	1.20488	1.05696-1.37350	0.004	1.16953	1.05077-1.30172	0.165	1.22781	0.92288-1.63349	0.158	1.22781	0.92704-1.62617	-0.45605	0.02241	1	5.90517	51	1	0.35238	50	1	3.60577e-258	0.303743
ebi-a-GCST90027574	8	0.845	1.69759	0.01063-271.1321	0.001	0.23922	0.10144-0.56412	0.004	0.28252	0.11881-0.67181	0.042	0.21106	0.06188-0.71995	0.055	0.21684	0.05877-0.80004	-0.17238	0.50787	0.068	14.8605	7	0.03783	13.7269	6	0.03284	1.65895e-34	0.67351
ebi-a-GCST90027472	4	0.864	0.79598	0.07952-7.9675	0.01	2.13845	1.19883-3.81449	0.004	1.93076	1.22724-3.03759	0.151	2.16033	0.98343-4.74570	0.123	2.16033	1.06468-4.38353	0.20218	0.52231	0.877	0.617	3	0.89253	0.02569	2	0.98724	2.2419e-18	0.592488
ebi-a-GCST90027449	50	0.148	1.92013	0.80461-4.5822	0.096	1.15916	0.97438-1.37898	0.005	1.20756	1.05923-1.37666	0.074	1.41973	0.97486-2.06763	0.57	1.11358	0.77036-1.60972	-0.08354	0.29572	1	10.9712	49	1	9.85354	48	1	5.07592e-251	0.417599
ebi-a-GCST90027667	45	0	10.7634	5.80195-19.9674	0.018	0.67837	0.49208-0.93519	0.005	1.4082	1.10895-1.78819	0.331	0.66977	0.30134-1.48869	0.582	0.66977	0.16250-2.76066	-0.2265	0	0.046	62.4612	44	0.03483	15.9515	43	0.99995	1.76377e-212	0.902467
ebi-a-GCST90027589	23	0.52	0.46265	0.04590-4.6632	0	0.56719	0.42080-0.76451	0.005	0.72645	0.58089-0.90849	0.039	0.55554	0.32831-0.94003	0.036	0.55756	0.33359-0.93189	0.05813	0.70443	0.8	16.2687	22	0.80233	16.1208	21	0.76283	4.06631e-115	0.367139
ebi-a-GCST90027495	38	0.159	0.28144	0.05004-1.5828	0.002	1.66771	1.21014-2.29829	0.005	1.42419	1.11172-1.82447	0.074	1.89939	0.95907-3.76162	0.073	1.85024	0.96186-3.55913	0.15332	0.07116	1	11.4058	37	0.99998	7.94847	36	1	4.12493e-193	0.888761
ebi-a-GCST90027481	55	0	28.3632	7.38302-108.9624	0	1.84265	1.38091-2.45878	0.006	1.35015	1.09122-1.67052	0.043	2.1124	1.04327-4.27717	0.04	2.1124	1.05186-4.24223	-0.3018	4e-05	0.998	31.3892	54	0.99411	11.2229	53	1	6.14159e-300	0.895876
ebi-a-GCST90027619	14	0.075	23.0177	0.98053-540.3339	0.78	0.93686	0.59270-1.48086	0.006	0.6127	0.43262-0.86775	0.938	1.03299	0.46438-2.29785	0.997	0.99858	0.49182-2.02749	-0.4946	0.04298	0.286	16.3318	13	0.23168	11.2105	12	0.51097	3.5277e-66	0.423683
ebi-a-GCST90027455	24	0.98	1.02827	0.11867-8.9097	0.002	1.97101	1.28452-3.02438	0.007	1.57827	1.13450-2.19562	0.081	2.02928	0.94959-4.33656	0.066	2.02928	0.98791-4.16836	0.03658	0.69771	1	4.53797	23	0.99999	4.38309	22	0.99998	1.30349e-117	0.92841
ebi-a-GCST90027706	18	0	74406.8	1246.64275-4441022.0620	0.795	1.06441	0.66467-1.70457	0.007	0.58915	0.40150-0.86450	0.779	1.16401	0.40978-3.30646	0.733	1.15465	0.51250-2.60142	-1.3716	4e-05	0.021	32.5688	17	0.01278	0.72209	16	1	2.70826e-78	0.539198
ebi-a-GCST90027775	11	0.658	0.41739	0.00995-17.5013	0.195	1.54028	0.80200-2.95819	0.007	1.92109	1.19586-3.08613	0.567	1.39797	0.46107-4.23861	0.541	1.3884	0.50275-3.83422	0.14191	0.44024	0.753	6.83088	10	0.74131	6.17894	9	0.72188	5.02153e-49	0.94805
ebi-a-GCST90027539	20	0.162	7.63044	0.49712-117.1216	0.116	0.67338	0.41114-1.10287	0.007	0.61577	0.43163-0.87847	0.446	0.69384	0.27631-1.74230	0.399	0.66369	0.26178-1.68267	-0.21592	0.08513	0.581	17.3735	19	0.56458	14.0543	18	0.72554	7.98716e-100	0.567166
ebi-a-GCST90027602	22	0.328	2.65796	0.39385-17.9377	0.064	0.67281	0.44246-1.02306	0.008	0.63886	0.45977-0.88771	0.382	0.7018	0.32243-1.52754	0.402	0.7018	0.31161-1.58057	-0.13669	0.15296	1	5.25525	21	0.9998	3.04804	20	1	7.79923e-107	0.53461
ebi-a-GCST90027503	14	0.602	1.72376	0.23458-12.6665	0.007	0.46245	0.26293-0.81336	0.008	0.56299	0.36903-0.85891	0.067	0.38358	0.14963-0.98332	0.064	0.38358	0.15139-0.97186	-0.10702	0.28251	0.957	6.22597	13	0.93754	4.9599	12	0.9593	2.15504e-65	0.499615
ebi-a-GCST90027460	36	0.201	0.24065	0.02835-2.0426	0.035	0.69142	0.49030-0.97506	0.008	0.68232	0.51475-0.90443	0.283	0.70032	0.36903-1.32904	0.304	0.69892	0.35637-1.37072	0.11321	0.34209	1	1.39406	35	1	0.46569	34	1	2.88318e-183	0.637273
ebi-a-GCST90027640	60	0.042	0.11889	0.01590-0.8890	0.001	1.51499	1.17564-1.95229	0.008	1.30369	1.07176-1.58582	0.106	1.52742	0.92124-2.53248	0.127	1.52742	0.89392-2.60988	0.21796	0.02252	1	22.8992	59	0.99999	17.4041	58	1	0	0.823169
ebi-a-GCST90027604	30	0.343	0.54418	0.15795-1.8748	0.122	1.4052	0.91286-2.16310	0.008	1.50719	1.11131-2.04409	0.269	1.56494	0.71796-3.41113	0.35	1.39938	0.69945-2.79972	0.11395	0.10697	0.972	15.835	29	0.97735	13.0612	28	0.99262	7.34343e-145	0.915805
ebi-a-GCST90027814	15	0.177	2.8572	0.67605-12.0754	0.032	1.55827	1.03996-2.33491	0.009	1.53231	1.11323-2.10915	0.181	1.55591	0.84100-2.87853	0.192	1.55591	0.82712-2.92685	-0.11863	0.40066	1	0.84884	14	1	0.09387	13	1	9.63675e-74	0.707949
ebi-a-GCST90027568	13	0.203	9.8208	0.36001-267.9077	0.007	2.31308	1.25713-4.25598	0.01	1.86132	1.16040-2.98561	0.068	2.5945	1.02225-6.58491	0.079	2.5945	0.97856-6.87893	-0.15708	0.34054	0.975	4.9938	12	0.95819	4.00129	11	0.96988	4.03525e-62	0.963422
ebi-a-GCST90027815	12	0.73	0.82601	0.28726-2.3752	0.031	0.70499	0.51297-0.96890	0.01	0.71233	0.54970-0.92307	0.186	0.70523	0.43415-1.14558	0.178	0.70413	0.43646-1.13595	-0.03142	0.78263	1	0.92358	11	0.99997	0.84324	10	0.99992	1.82763e-55	0.218496
ebi-a-GCST90027581	26	0.082	0.07043	0.00403-1.2322	0.002	2.03374	1.30167-3.17752	0.011	1.53336	1.10425-2.12922	0.058	2.09875	1.00851-4.36756	0.057	2.09875	1.01443-4.34210	0.2526	0.04419	0.93	15.3967	25	0.93161	10.8864	24	0.9898	8.60145e-121	0.896652
ebi-a-GCST90027587	38	0.073	3.95411	0.91861-17.0203	0.008	1.60084	1.12840-2.27110	0.013	1.38997	1.07307-1.80046	0.176	1.6166	0.81736-3.19734	0.171	1.60474	0.82613-3.11716	-0.11313	0.16236	0.696	32.081	37	0.69876	30.0463	36	0.74689	2.62224e-195	0.842188
ebi-a-GCST90027555	8	0.636	2.50133	0.06791-92.1272	0.053	0.48459	0.23264-1.00940	0.014	0.47411	0.26211-0.85756	0.362	0.57515	0.18904-1.74994	0.401	0.60113	0.19711-1.83325	-0.1463	0.39482	0.869	3.21841	7	0.86409	2.3787	6	0.88179	1.72797e-35	0.41132
ebi-a-GCST90027462	29	0.957	1.05542	0.15365-7.2498	0.049	1.20979	1.00080-1.46242	0.018	1.19316	1.03094-1.38089	0.273	1.20972	0.86624-1.68940	0.268	1.20972	0.86937-1.68332	0.02025	0.90136	1	4.09034	28	1	4.07468	27	1	9.46318e-137	0.232233
ebi-a-GCST90027613	11	0.939	0.93433	0.17270-5.0547	0.016	0.47619	0.26042-0.87073	0.019	0.57163	0.35793-0.91290	0.153	0.43165	0.14905-1.25008	0.098	0.44987	0.19056-1.06203	-0.0545	0.56732	0.631	8.38512	10	0.59127	8.03262	9	0.53086	3.7023e-50	0.393241
ebi-a-GCST90027527	25	0.703	0.62254	0.05614-6.9038	0.719	1.08767	0.68858-1.71806	0.023	1.47778	1.05485-2.07026	0.862	1.08518	0.43462-2.70953	0.841	1.08518	0.49160-2.39544	0.0891	0.48408	0.937	14.4723	24	0.93525	13.9665	23	0.92783	1.40207e-117	0.81227
ebi-a-GCST90027488	32	0.074	3.17338	0.93625-10.7560	0.595	0.90908	0.63969-1.29192	0.024	0.75015	0.58395-0.96365	0.952	0.97978	0.50935-1.88471	0.94	0.97978	0.57593-1.66681	-0.201	0.02463	0.98	17.2656	31	0.97785	11.6668	30	0.99893	2.76637e-200	0.47983
ebi-a-GCST90027572	14	0.129	0.15878	0.01735-1.4536	0.122	1.73079	0.86405-3.46694	0.026	2.11084	1.09410-4.07244	0.68	1.2829	0.40310-4.08291	0.51	1.40903	0.52264-3.79876	0.24857	0.0355	0.004	29.5189	13	0.00552	20.1151	12	0.06494	1.61408e-66	0.999234
ebi-a-GCST90027801	5	0.678	2.31338	0.06414-83.4392	0.035	0.4927	0.25526-0.95099	0.026	0.58294	0.36202-0.93866	0.144	0.43025	0.17267-1.07209	0.12	0.43214	0.18751-0.99593	-0.20858	0.5024	0.642	2.78791	4	0.59392	2.20993	3	0.53	1.12893e-23	0.200959
ebi-a-GCST90027532	12	0.048	2.08873	1.09900-3.9698	0.025	1.33248	1.03652-1.71295	0.027	1.25136	1.02552-1.52695	0.101	1.39774	0.96857-2.01708	0.123	1.38846	0.94502-2.03997	-0.15535	0.13105	0.985	3.58303	11	0.98057	0.87792	10	0.99991	5.30758e-57	0.181582
ebi-a-GCST90027653	28	0.989	1.01113	0.21384-4.7811	0.299	1.17963	0.86393-1.61071	0.028	1.30638	1.02912-1.65833	0.568	1.17518	0.67938-2.03279	0.563	1.17518	0.68427-2.01827	0.03752	0.74622	1	8.07038	27	0.99984	7.96339	26	0.99974	3.48264e-131	0.480993
ebi-a-GCST90027590	37	0	0.13736	0.05632-0.3351	0.574	0.94323	0.76922-1.15659	0.029	1.16448	1.01547-1.33534	0.574	0.8659	0.52621-1.42488	0.565	0.8731	0.55227-1.38032	0.38551	3e-05	0.659	32.9103	36	0.61633	10.3033	35	0.99998	1.60513e-181	0.227162
ebi-a-GCST90027751	11	0.849	1.16774	0.24849-5.4877	0.055	1.6134	0.98933-2.63112	0.034	1.52387	1.03201-2.25016	0.17	1.68395	0.84406-3.35956	0.161	1.65125	0.86221-3.16237	0.03173	0.73557	0.986	3.10014	10	0.97897	2.97878	9	0.96513	5.05507e-54	0.563103
ebi-a-GCST90027845	27	0.017	2.43054	1.22807-4.8104	0.001	0.74747	0.63132-0.88499	0.035	0.87153	0.76676-0.99062	0.092	0.71888	0.49688-1.04007	0.078	0.71888	0.50535-1.02265	-0.32634	0.00607	0.993	11.8895	26	0.99178	2.90221	25	1	8.19562e-124	0.122628
ebi-a-GCST90027807	14	0.464	1.75591	0.40788-7.5592	0.024	0.67791	0.48391-0.94970	0.035	0.74627	0.56814-0.98025	0.178	0.66802	0.38327-1.16431	0.169	0.66802	0.38841-1.14891	-0.13041	0.26492	1	1.46205	13	0.99996	0.09442	12	1	8.40756e-69	0.210867
ebi-a-GCST90027474	5	0.325	4.65879	0.35730-60.7451	0.03	1.94105	1.06509-3.53742	0.036	1.6874	1.03602-2.74831	0.184	1.96174	0.86078-4.47084	0.162	1.97112	0.90568-4.28994	-0.14584	0.48746	0.95	0.63261	4	0.95937	0.00927	3	0.99976	5.80378e-24	0.451161
ebi-a-GCST90027737	24	0.006	0.02953	0.00300-0.2904	0.577	0.87688	0.55257-1.39153	0.038	1.49202	1.02337-2.17530	0.533	0.75815	0.32182-1.78607	0.463	0.76492	0.37816-1.54725	0.40121	0.00258	0.163	30.4654	23	0.1365	18.9151	22	0.65057	1.92679e-110	0.819888
ebi-a-GCST90027663	24	0.006	0.0295	0.00300-0.2897	0.577	0.87684	0.55254-1.39148	0.038	1.49188	1.02324-2.17515	0.534	0.75823	0.32096-1.79125	0.464	0.76501	0.37772-1.54940	0.40131	0.00256	0.163	30.4684	23	0.13642	18.9	22	0.6515	1.95749e-110	0.819646
ebi-a-GCST90027482	12	0.86	0.85897	0.16473-4.4790	0.383	0.78678	0.45927-1.34783	0.039	0.65322	0.43634-0.97789	0.645	0.81445	0.34790-1.90663	0.593	0.80278	0.36685-1.75674	-0.03541	0.74444	0.969	3.92453	11	0.97207	3.81222	10	0.95542	6.7548e-57	0.302582
ebi-a-GCST90027824	50	0.798	1.20287	0.29434-4.9157	0.126	1.24175	0.94088-1.63884	0.041	1.25484	1.00985-1.55926	0.456	1.24929	0.69950-2.23122	0.551	1.21009	0.64979-2.25353	0.00386	0.95272	1	9.97315	49	1	9.9696	48	1	1.41552e-268	0.599135
ebi-a-GCST90027830	21	0.642	1.77323	0.16447-19.1185	0.138	0.78968	0.57801-1.07887	0.044	0.77487	0.60462-0.99308	0.386	0.79579	0.48017-1.31889	0.188	0.71003	0.43397-1.16172	-0.11052	0.50092	1	0.62937	20	1	0.1586	19	1	8.06544e-107	0.243878
ebi-a-GCST90027541	18	0.153	0.21862	0.02996-1.5952	0.025	1.78894	1.07736-2.97053	0.044	1.46868	1.01044-2.13472	0.087	2.54997	0.92950-6.99550	0.09	2.54997	0.91781-7.08463	0.17365	0.07386	0.818	11.6737	17	0.81948	8.01526	16	0.94841	2.30212e-84	0.661921
ebi-a-GCST90027634	22	0.237	0.32172	0.05202-1.9898	0.009	1.47891	1.10337-1.98227	0.044	1.25278	1.00561-1.56071	0.124	1.54935	0.90714-2.64622	0.133	1.54935	0.89423-2.68440	0.20214	0.15629	0.988	9.42211	21	0.98548	7.25215	20	0.99577	2.30614e-104	0.293855
ebi-a-GCST90027543	18	0.316	2.73129	0.40724-18.3183	0.944	1.01736	0.63062-1.64126	0.047	0.66322	0.44196-0.99524	0.876	1.05618	0.53742-2.07569	0.851	1.0645	0.55967-2.02471	-0.16472	0.15576	0.125	25.2194	17	0.08991	22.1476	16	0.13849	3.21828e-82	0.401466
ebi-a-GCST90027645	23	0.093	3.52564	0.86512-14.3681	0.727	0.92746	0.60807-1.41462	0.05	0.71998	0.51845-0.99986	0.988	0.99466	0.48535-2.03841	0.97	0.98809	0.53082-1.83928	-0.18014	0.03321	0.955	11.979	22	0.95781	6.78358	21	0.99853	1.59184e-108	0.360885
ebi-a-GCST90027719	20	0.688	0.54989	0.03111-9.7204	0.006	0.4976	0.30187-0.82023	0.051	0.69231	0.47874-1.00115	0.132	0.49532	0.20658-1.18762	0.144	0.49532	0.20077-1.22200	0.02134	0.87584	0.985	8.34145	19	0.98289	8.31634	18	0.97355	1.60201e-92	0.369992
ebi-a-GCST90027727	36	0.311	0.49203	0.12728-1.9020	0.001	0.60478	0.45154-0.81002	0.052	0.80641	0.64906-1.00191	0.091	0.56987	0.30196-1.07549	0.113	0.57155	0.29114-1.12201	0.06617	0.47307	0.998	13.8946	35	0.99946	13.3681	34	0.99942	2.32067e-169	0.276853
ebi-a-GCST90027509	26	0.176	4.77004	0.53117-42.8365	0.348	1.19993	0.81998-1.75595	0.054	1.30935	0.99572-1.72177	0.579	1.20263	0.63212-2.28806	0.548	1.20263	0.66376-2.17900	-0.21614	0.25607	0.993	11.2472	25	0.99166	9.89354	24	0.99497	2.67396e-121	0.461808
ebi-a-GCST90027794	4	0.921	0.67403	0.00068-664.8891	0.197	0.5645	0.23695-1.34482	0.054	0.5009	0.24808-1.01139	0.508	0.64034	0.19964-2.05385	0.454	0.61021	0.19752-1.88512	-0.02962	0.94012	0.763	1.24649	3	0.74188	1.2393	2	0.53813	3.3517e-19	0.221834
ebi-a-GCST90027562	11	0.04	11.4673	1.55389-84.6255	0.142	0.67411	0.39833-1.14081	0.055	0.65566	0.42608-1.00892	0.088	0.3768	0.13677-1.03806	0.064	0.3768	0.15014-0.94566	-0.36193	0.01899	0.196	14.1777	10	0.16504	6.03612	9	0.7363	2.06264e-49	0.273514
ebi-a-GCST90027664	17	0.55	0.47703	0.04456-5.1064	0.185	1.43351	0.84161-2.44167	0.057	1.49661	0.98829-2.26637	0.469	1.44221	0.54823-3.79401	0.447	1.44221	0.57440-3.62112	0.10487	0.35221	1	4.93608	16	0.99606	4.01423	15	0.99769	1.65602e-78	0.675212
ebi-a-GCST90027508	13	0.912	0.87191	0.08070-9.4200	0.803	0.91683	0.46385-1.81216	0.059	0.6158	0.37231-1.01855	0.772	1.18194	0.39204-3.56337	0.804	1.13734	0.42044-3.07664	-0.03158	0.77453	0.287	14.6341	12	0.26206	14.5203	11	0.20553	1.299e-59	0.381004
ebi-a-GCST90027855	17	0.78	1.17109	0.39527-3.4696	0.118	0.69257	0.43699-1.09762	0.06	0.72496	0.51834-1.01394	0.385	0.70329	0.32471-1.52325	0.402	0.70329	0.31536-1.56839	-0.07079	0.37724	0.802	11.496	16	0.77789	10.668	15	0.77576	7.78672e-77	0.266373
ebi-a-GCST90027828	14	0.156	0.35798	0.09451-1.3560	0.004	1.76947	1.19887-2.61166	0.062	1.3232	0.98608-1.77556	0.09	1.83655	0.95772-3.52184	0.086	1.83655	0.96751-3.48621	0.21849	0.07202	0.858	8.18192	13	0.83155	4.29043	12	0.97761	2.73859e-68	0.314024
ebi-a-GCST90027533	27	0.178	5.41458	0.49602-59.1059	0.676	1.11888	0.66095-1.89408	0.064	1.46849	0.97854-2.20375	0.361	0.48879	0.10815-2.20904	0.318	0.50539	0.13591-1.87929	-0.11143	0.28799	0.036	41.7609	26	0.02598	39.8807	25	0.03	9.2331e-124	0.826676
ebi-a-GCST90027697	15	0.423	0.37364	0.03625-3.8512	0.244	0.72996	0.42988-1.23951	0.065	0.68406	0.45708-1.02375	0.514	0.76432	0.34826-1.67742	0.53	0.76432	0.33736-1.73160	0.05312	0.61461	1	1.5738	14	0.99998	1.30769	13	0.99998	4.32498e-71	0.307846
ebi-a-GCST90027799	21	0.214	0.23483	0.02575-2.1413	0.093	0.72559	0.49906-1.05495	0.065	0.76721	0.57903-1.01655	0.29	0.7223	0.40199-1.29785	0.311	0.7223	0.39095-1.33449	0.16746	0.30312	0.993	7.84114	20	0.99287	6.72081	19	0.99556	1.88069e-101	0.250582
ebi-a-GCST90027793	7	0.904	0.65181	0.00090-474.3248	0.007	0.32101	0.14066-0.73261	0.068	0.50273	0.24021-1.05214	0.088	0.24008	0.06078-0.94829	0.077	0.24008	0.06449-0.89369	-0.02295	0.94098	0.224	8.6627	6	0.19345	8.65222	5	0.12377	5.22609e-32	0.348672
ebi-a-GCST90027450	7	0.892	1.21398	0.08516-17.3052	0.145	0.58047	0.27935-1.20616	0.069	0.58958	0.33387-1.04115	0.235	0.5123	0.18991-1.38195	0.295	0.54655	0.19475-1.53384	-0.07447	0.60892	0.881	2.50173	6	0.86827	2.20427	5	0.82022	2.58828e-32	0.249448
ebi-a-GCST90027678	5	0.197	105.2	0.42237-26202.4516	0.015	0.4768	0.26313-0.86398	0.077	0.56874	0.30411-1.06363	0.126	0.32709	0.10494-1.01954	0.175	0.32709	0.08658-1.23564	-0.7349	0.15956	0.168	7.82077	4	0.09837	3.62853	3	0.30447	2.26231e-22	0.206927
ebi-a-GCST90027631	8	0.471	0.14401	0.00103-20.1808	0.141	0.56056	0.25936-1.21156	0.079	0.53563	0.26669-1.07577	0.179	0.37104	0.10103-1.36260	0.237	0.47242	0.15156-1.47255	0.15792	0.61724	0.183	11.1113	7	0.13384	10.6201	6	0.10085	4.25377e-37	0.353543
ebi-a-GCST90027513	8	0.349	0.18435	0.00706-4.8158	0.417	1.41746	0.61029-3.29219	0.08	1.7544	0.93456-3.29345	0.96	1.03683	0.26203-4.10266	0.95	1.04687	0.26338-4.16096	0.22403	0.21699	0.51	6.27114	7	0.50847	4.3685	6	0.62694	1.45859e-37	0.724616
ebi-a-GCST90027585	15	0.246	6.29098	0.32278-122.6104	0.092	1.60861	0.92608-2.79417	0.086	1.4645	0.94682-2.26522	0.318	1.61878	0.65036-4.02928	0.275	1.61878	0.70484-3.71779	-0.16969	0.34855	1	1.85382	14	0.99995	0.90806	13	1	8.09155e-74	0.586625
ebi-a-GCST90027668	20	0.042	0.18394	0.04037-0.8381	0.098	0.66948	0.41600-1.07741	0.088	0.72729	0.50473-1.04797	0.32	0.65195	0.28664-1.48287	0.346	0.65195	0.27375-1.55265	0.1763	0.08376	1	4.02317	19	0.99989	0.67197	18	1	6.19336e-105	0.331375
ebi-a-GCST90027456	5	0.191	12.3215	0.66351-228.8120	0.464	1.34979	0.60500-3.01146	0.089	1.71081	0.92097-3.17802	0.745	1.21682	0.40431-3.66220	0.757	1.1877	0.43007-3.28003	-0.2616	0.26832	0.673	2.47759	4	0.64865	0.64058	3	0.88708	6.47874e-27	0.52313
ebi-a-GCST90027575	8	0.667	1.37791	0.34311-5.5337	0.08	0.72628	0.50766-1.03905	0.09	0.78171	0.58801-1.03922	0.244	0.7155	0.42691-1.19917	0.202	0.71649	0.45068-1.13906	-0.13425	0.44545	0.988	1.33293	7	0.98754	0.66637	6	0.99519	4.05992e-37	0.11252
ebi-a-GCST90027789	20	0	18482.7	464.59671-735284.6622	0.769	1.06476	0.70069-1.61798	0.091	0.74235	0.52547-1.04876	0.698	1.14072	0.59308-2.19406	0.715	1.12745	0.59803-2.12555	-1.21536	4e-05	0.036	32.8069	19	0.0253	3.64565	18	0.99988	2.71171e-89	0.276562
ebi-a-GCST90027739	35	0.874	1.13172	0.24867-5.1505	0.275	1.17141	0.88199-1.55580	0.093	1.19159	0.97134-1.46177	0.547	1.1954	0.67264-2.12444	0.471	1.20135	0.73356-1.96747	0.00768	0.94676	0.996	16.8319	34	0.99397	16.8274	33	0.9912	4.56358e-170	0.273276
ebi-a-GCST90027491	19	0.992	1.00796	0.23642-4.2974	0.588	0.86415	0.50972-1.46503	0.094	0.72144	0.49249-1.05684	0.77	0.84973	0.29037-2.48666	0.813	0.88842	0.33886-2.32925	-0.03414	0.64534	0.861	12.0804	18	0.84306	11.8608	17	0.80849	1.17538e-93	0.318029
ebi-a-GCST90027805	9	0.498	0.53572	0.09657-2.9720	0.112	0.71537	0.47305-1.08184	0.094	0.74945	0.53485-1.05016	0.26	0.6985	0.39111-1.24749	0.264	0.69896	0.38964-1.25385	0.06226	0.70692	1	0.29545	8	0.99998	0.14201	7	0.99999	3.1526e-42	0.144149
ebi-a-GCST90027749	15	0.625	0.63063	0.10353-3.8413	0.559	1.17684	0.68128-2.03289	0.097	1.41431	0.93965-2.12874	0.807	0.8896	0.35404-2.23528	0.837	0.90482	0.35431-2.31067	0.08472	0.38476	0.94	7.23469	14	0.92529	6.42565	13	0.92928	1.30318e-71	0.488173
ebi-a-GCST90027738	15	0.624	0.63001	0.10362-3.8305	0.561	1.17573	0.68077-2.03053	0.097	1.41397	0.93958-2.12787	0.808	0.88984	0.35416-2.23575	0.837	0.90506	0.35636-2.29860	0.08483	0.38385	0.94	7.23631	14	0.92522	6.42407	13	0.92935	1.11618e-71	0.487887
ebi-a-GCST90027652	15	0.624	0.62997	0.10366-3.8287	0.561	1.17579	0.68074-2.03083	0.097	1.41403	0.93954-2.12813	0.808	0.88986	0.35416-2.23584	0.837	0.90508	0.35676-2.29617	0.08483	0.38368	0.94	7.23674	14	0.9252	6.42388	13	0.92936	1.19336e-71	0.487842
ebi-a-GCST90027832	38	0.003	4.15088	1.70898-10.0819	0.962	1.00782	0.72920-1.39291	0.1	1.22028	0.96242-1.54723	0.667	0.85251	0.41450-1.75335	0.653	0.85251	0.42720-1.70124	-0.12518	0.00804	0.995	20.1113	37	0.98927	12.2367	36	0.99993	2.01658e-189	0.374761
ebi-a-GCST90027821	29	0.793	0.86661	0.29993-2.5039	0.137	1.21316	0.94036-1.56510	0.104	1.17921	0.96664-1.43852	0.417	1.21257	0.76659-1.91802	0.398	1.21257	0.78106-1.88248	0.03897	0.56724	1	2.84276	28	1	2.50725	27	1	3.26375e-142	0.210956
ebi-a-GCST90027779	18	0.192	3.60472	0.56990-22.8005	0.8	1.05857	0.68161-1.64400	0.111	1.33128	0.93649-1.89249	0.986	0.99316	0.45718-2.15753	0.986	0.99316	0.47229-2.08848	-0.09635	0.29691	0.999	4.56028	17	0.99877	3.39767	16	0.99961	6.14686e-86	0.389691
ebi-a-GCST90027614	8	0.078	0.04531	0.00262-0.7844	0.885	1.06394	0.45834-2.46972	0.115	0.50218	0.21327-1.18250	0.8	1.21205	0.28917-5.08038	0.804	1.21205	0.27990-5.24847	0.22936	0.13715	0.064	14.7611	7	0.03919	9.90502	6	0.12871	1.82185e-37	0.403476
ebi-a-GCST90027680	22	0.001	0.05192	0.01252-0.2153	0.003	0.64331	0.48227-0.85812	0.115	0.81925	0.63913-1.05011	0.035	0.59957	0.38476-0.93430	0.027	0.60549	0.40001-0.91651	0.42971	0.00101	0.171	27.9773	21	0.1408	13.1843	20	0.86934	2.95274e-102	0.174287
ebi-a-GCST90027809	22	0.001	0.05177	0.01245-0.2152	0.003	0.64241	0.48135-0.85737	0.116	0.81909	0.63878-1.05030	0.033	0.59862	0.38490-0.93101	0.028	0.60456	0.39851-0.91717	0.42951	0.00102	0.171	27.9804	21	0.14071	13.215	20	0.86797	6.2952e-102	0.174122
ebi-a-GCST90027725	22	0.001	0.0515	0.01236-0.2146	0.003	0.64304	0.48199-0.85789	0.116	0.81939	0.63916-1.05043	0.034	0.59894	0.38496-0.93186	0.027	0.60486	0.39934-0.91616	0.4308	0.00101	0.171	27.9855	21	0.14056	13.2087	20	0.86825	4.23486e-102	0.173906
ebi-a-GCST90027695	10	0.731	1.4007	0.21941-8.9422	0.327	1.36387	0.73290-2.53803	0.116	1.44849	0.91220-2.30007	0.478	1.47074	0.52979-4.08287	0.498	1.42192	0.53577-3.77377	0.00432	0.97168	0.561	7.70775	9	0.56385	7.70641	8	0.46266	3.70105e-47	0.399054
ebi-a-GCST90027647	44	0.014	3.48282	1.34081-9.0468	0.006	1.57745	1.13768-2.18719	0.12	1.21967	0.94972-1.56637	0.099	1.8621	0.90401-3.83557	0.067	1.87623	0.97295-3.61809	-0.14543	0.03097	0.996	21.1673	43	0.99791	16.1835	42	0.99989	9.22779e-225	0.424014
ebi-a-GCST90027584	4	0.2	0.07828	0.00554-1.1053	0.238	0.60812	0.26603-1.39010	0.122	0.58707	0.29864-1.15405	0.23	0.38404	0.11030-1.33711	0.257	0.4044	0.11330-1.44341	0.30393	0.26374	0.425	3.24476	3	0.35541	0.87723	2	0.64493	9.65834e-19	0.164237
ebi-a-GCST90027605	6	0.793	1.65365	0.04957-55.1690	0.491	0.76741	0.36129-1.63007	0.123	0.62723	0.34698-1.13386	0.931	1.06014	0.30034-3.74210	0.934	1.04743	0.37178-2.95099	-0.21376	0.61183	0.62	3.4862	5	0.62548	3.18412	4	0.5275	8.94614e-32	0.211196
ebi-a-GCST90027792	10	0.456	0.49184	0.08337-2.9017	0.103	1.43202	0.93051-2.20382	0.124	1.31514	0.92797-1.86385	0.315	1.44471	0.73354-2.84534	0.274	1.44471	0.77788-2.68315	0.13143	0.30018	0.969	2.86868	9	0.96927	1.64169	8	0.9901	6.42401e-51	0.234178
ebi-a-GCST90027567	11	0.58	0.47351	0.03680-6.0922	0.126	1.78482	0.85044-3.74582	0.132	1.5867	0.86951-2.89545	0.281	1.96851	0.61418-6.30922	0.264	2.01205	0.63189-6.40666	0.15865	0.3647	0.999	1.39247	10	0.99923	0.48117	9	0.99997	1.85524e-57	0.679687
ebi-a-GCST90027496	8	0.187	2.21474	0.77810-6.3039	0.075	1.38736	0.96767-1.98908	0.135	1.24021	0.93524-1.64463	0.227	1.40462	0.84912-2.32352	0.21	1.41035	0.86508-2.29931	-0.12846	0.30226	0.986	1.35657	7	0.98686	0.0834	6	0.99999	9.48972e-42	0.13545
ebi-a-GCST90027597	18	0.968	1.02236	0.34834-3.0006	0.015	0.74582	0.58884-0.94465	0.137	0.85785	0.70089-1.04997	0.069	0.73608	0.53996-1.00343	0.092	0.74486	0.53934-1.02868	-0.03662	0.74904	0.126	24.9032	17	0.0969	24.7394	16	0.07455	2.53465e-82	0.111263
ebi-a-GCST90027544	18	0.213	1.71308	0.75996-3.8616	0.057	1.39764	0.98962-1.97389	0.143	1.22342	0.93399-1.60255	0.276	1.39234	0.78192-2.47932	0.278	1.39604	0.77936-2.50066	-0.05443	0.40214	0.999	4.83458	17	0.9982	4.09386	16	0.99873	5.55066e-84	0.201521
ebi-a-GCST90027511	4	0.748	1.46459	0.19299-11.1148	0.145	1.49403	0.87021-2.56503	0.148	1.40654	0.88567-2.23374	0.322	1.49683	0.76695-2.92132	0.329	1.49683	0.75866-2.95323	-0.00637	0.97161	0.985	0.16881	3	0.98246	0.1672	2	0.9198	4.63575e-20	0.16508
ebi-a-GCST90027563	7	0.335	1.6613	0.65322-4.2251	0.37	1.17318	0.82746-1.66336	0.151	1.21547	0.93144-1.58612	0.219	1.38029	0.87111-2.18710	0.209	1.39498	0.87707-2.21870	-0.09315	0.52408	0.901	2.14285	6	0.9061	1.67429	5	0.89212	9.06186e-36	0.108515
ebi-a-GCST90027853	15	0.249	1.97983	0.65324-6.0005	0.026	1.40528	1.04181-1.89555	0.162	1.19754	0.93012-1.54184	0.063	1.58852	1.01470-2.48685	0.055	1.58852	1.03028-2.44924	-0.1042	0.37787	0.095	21.8963	14	0.08077	20.577	13	0.08173	5.2635e-67	0.147831
ebi-a-GCST90027624	7	0.097	22.2088	1.13389-434.9914	0.432	1.20663	0.75502-1.92838	0.162	1.32187	0.89383-1.95490	0.85	0.92011	0.40340-2.09867	0.779	0.89748	0.43589-1.84789	-0.52647	0.12023	0.257	7.96319	6	0.24081	4.46191	5	0.485	1.19399e-32	0.175024
ebi-a-GCST90027819	15	0.16	0.22864	0.03278-1.5947	0.007	1.83251	1.17859-2.84924	0.164	1.26368	0.90867-1.75738	0.12	1.98268	0.88095-4.46225	0.128	1.98268	0.86472-4.54601	0.18721	0.10355	0.714	10.8905	14	0.69461	7.82573	13	0.85477	1.69819e-76	0.246581
ebi-a-GCST90027734	15	0.155	0.22183	0.03143-1.5659	0.007	1.83376	1.17863-2.85304	0.165	1.2637	0.90819-1.75838	0.123	1.98802	0.87542-4.51469	0.131	1.97773	0.86046-4.54572	0.19018	0.10008	0.714	10.8967	14	0.69413	7.76224	13	0.85874	2.84823e-76	0.246048
ebi-a-GCST90027752	15	0.155	0.22198	0.03152-1.5632	0.007	1.83335	1.17853-2.85200	0.165	1.26351	0.90814-1.75793	0.123	1.98787	0.87555-4.51332	0.131	1.97758	0.86044-4.54512	0.19016	0.09985	0.714	10.898	14	0.69403	7.75879	13	0.85895	2.57608e-76	0.245869
ebi-a-GCST90027660	15	0.154	0.22179	0.03149-1.5622	0.007	1.83338	1.17852-2.85211	0.165	1.2635	0.90812-1.75795	0.123	1.98807	0.87547-4.51462	0.131	1.97777	0.86053-4.54557	0.19024	0.09973	0.714	10.8984	14	0.694	7.75656	13	0.85909	2.62759e-76	0.245837
ebi-a-GCST90027686	15	0.154	0.22189	0.03151-1.5623	0.007	1.83339	1.17852-2.85216	0.165	1.2635	0.90811-1.75797	0.123	1.98809	0.87537-4.51524	0.131	1.9778	0.86018-4.54750	0.19019	0.09975	0.714	10.8984	14	0.694	7.7571	13	0.85906	2.65552e-76	0.245826
ebi-a-GCST90027747	15	0.154	0.22173	0.03148-1.5617	0.007	1.83339	1.17852-2.85217	0.165	1.2635	0.90811-1.75797	0.123	1.98816	0.87543-4.51523	0.131	1.97786	0.86019-4.54775	0.19026	0.09968	0.714	10.8985	14	0.69399	7.75566	13	0.85915	2.65692e-76	0.245819
ebi-a-GCST90027617	17	0.967	1.03566	0.20701-5.1813	0.131	1.47885	0.88968-2.45819	0.17	1.30844	0.89113-1.92117	0.331	1.48118	0.68770-3.19019	0.28	1.4861	0.74246-2.97456	0.02675	0.77348	1	3.34316	16	0.99965	3.25727	15	0.99933	1.25831e-79	0.323964
ebi-a-GCST90027598	8	0.151	11.4436	0.62531-209.4284	0.01	2.50791	1.25083-5.02836	0.171	1.66388	0.80300-3.44767	0.057	2.56241	1.13951-5.76210	0.031	2.61122	1.29979-5.24582	-0.21115	0.22923	0.126	13.3992	7	0.06296	10.3183	6	0.11187	9.19473e-37	0.615447
ebi-a-GCST90027582	8	0.827	2.62777	0.00067-10277.9561	0.638	1.1973	0.56560-2.53452	0.173	1.47789	0.84315-2.59048	0.909	0.93133	0.28721-3.02004	0.916	0.93809	0.29918-2.94144	-0.0487	0.89575	0.777	4.02116	7	0.77734	4.00248	6	0.67634	1.49353e-37	0.362559
ebi-a-GCST90027490	24	0.995	0.98535	0.01514-64.1480	0.869	0.96199	0.60792-1.52228	0.179	1.27553	0.89453-1.81881	0.809	0.89202	0.35629-2.23326	0.778	0.88424	0.37924-2.06171	0.0221	0.90431	0.294	26.2326	23	0.29001	26.215	22	0.24256	2.6292e-110	0.360452
ebi-a-GCST90027603	8	0.055	22.291	1.73059-287.1208	0.733	1.14432	0.52794-2.48031	0.186	1.66398	0.78270-3.53755	0.989	1.01171	0.21619-4.73452	0.964	0.97093	0.28433-3.31552	-0.33473	0.08597	0.083	14.0536	7	0.05024	8.25718	6	0.21986	2.32291e-37	0.623102
ebi-a-GCST90027616	19	0.527	0.6433	0.16875-2.4523	0.247	0.79092	0.53187-1.17615	0.187	0.81198	0.59574-1.10671	0.279	0.67176	0.33403-1.35097	0.28	0.67931	0.34376-1.34241	0.03692	0.7302	1	5.35938	18	0.99818	5.23646	17	0.99702	6.60839e-108	0.186461
ebi-a-GCST90027693	18	0.358	0.3116	0.02785-3.4866	0.185	1.43056	0.84267-2.42861	0.19	1.31204	0.87420-1.96917	0.439	1.4413	0.58380-3.55833	0.444	1.4413	0.57819-3.59283	0.13165	0.25385	0.874	10.6336	17	0.87496	9.23265	16	0.90352	1.73467e-82	0.345154
ebi-a-GCST90027470	11	0.725	0.13131	0.00000-7419.6600	0.432	1.28998	0.68321-2.43564	0.194	1.38342	0.84772-2.25762	0.668	1.24384	0.47233-3.27552	0.678	1.2377	0.46559-3.29022	0.20222	0.68277	0.976	3.40614	10	0.97019	3.22787	9	0.95457	1.24727e-51	0.326374
ebi-a-GCST90027701	26	0.016	0.1805	0.04946-0.6587	0.06	0.68439	0.46119-1.01562	0.208	0.81376	0.59039-1.12164	0.31	0.64477	0.28096-1.47967	0.293	0.63907	0.28210-1.44776	0.17998	0.02713	1	6.23096	25	0.99995	0.69226	24	1	1.11374e-133	0.215111
ebi-a-GCST90027583	25	0.945	1.04225	0.32498-3.3427	0.42	0.83106	0.53015-1.30275	0.215	0.80451	0.57039-1.13474	0.648	0.82911	0.37461-1.83502	0.639	0.82911	0.38265-1.79649	-0.03199	0.65286	0.966	13.0663	24	0.96501	12.8586	23	0.95499	1.46717e-122	0.219769
ebi-a-GCST90027593	14	0.125	168.08	0.37921-74499.4714	0.173	1.21007	0.91985-1.59187	0.216	1.14834	0.92227-1.42983	0.396	1.21001	0.79078-1.85150	0.397	1.21001	0.78960-1.85426	-1.0608	0.13454	1	2.59647	13	0.99904	0.02146	12	1	1.56829e-64	0.0997497
ebi-a-GCST90027547	17	0.566	2.33223	0.13797-39.4231	0.63	0.9022	0.59346-1.37154	0.217	0.81087	0.58123-1.13123	0.782	0.9042	0.44880-1.82168	0.783	0.9042	0.44627-1.83199	-0.11067	0.47222	1	2.46571	16	0.99996	1.92186	15	0.99998	7.98022e-79	0.150145
ebi-a-GCST90027777	7	0.307	0.00061	0.00000-215.6480	0.175	1.71476	0.78679-3.73721	0.224	1.44605	0.79810-2.62005	0.344	1.72776	0.60895-4.90212	0.336	1.72776	0.61978-4.81648	0.67755	0.28606	0.94	1.74594	6	0.94152	0.32048	5	0.99724	6.72844e-36	0.307563
ebi-a-GCST90027788	6	0.995	1.44617	0.00000-15800000000000000000000000000000000000000000000000.0000	0.334	1.28092	0.77550-2.11574	0.232	1.28155	0.85356-1.92416	0.491	1.28068	0.66695-2.45916	0.466	1.28068	0.69219-2.36949	-0.02185	0.99843	1	4e-05	5	1	4e-05	4	1	8.8893e-32	0.137569
ebi-a-GCST90027705	6	0.995	1.45183	0.00000-54200000000000000000000000000000000000000000000000.0000	0.334	1.2812	0.77526-2.11732	0.232	1.28185	0.85343-1.92534	0.491	1.28097	0.66675-2.46102	0.466	1.28095	0.69203-2.37104	-0.02249	0.9984	1	4e-05	5	1	4e-05	4	1	1.23748e-31	0.137341
ebi-a-GCST90027633	12	0.19	3.38246	0.61780-18.5190	0.249	1.35936	0.80686-2.29020	0.24	1.27439	0.85073-1.90904	0.512	1.36228	0.55698-3.33195	0.528	1.34842	0.54891-3.31249	-0.10275	0.27358	0.966	4.08717	11	0.9673	2.74504	10	0.9868	1.1393e-55	0.202094
ebi-a-GCST90027744	5	0.614	34.2241	0.00015-7870362.6710	0.472	0.72426	0.30065-1.74473	0.241	0.65821	0.32692-1.32519	0.64	0.73921	0.22912-2.38490	0.666	0.7504	0.22363-2.51797	-0.339	0.57439	0.716	2.2065	4	0.69784	1.81174	3	0.61238	9.48274e-24	0.147962
ebi-a-GCST90027658	5	0.614	34.4226	0.00015-7991462.0520	0.472	0.72425	0.30063-1.74479	0.241	0.65819	0.32691-1.32520	0.64	0.73919	0.22911-2.38492	0.666	0.75037	0.22399-2.51372	-0.33948	0.57414	0.716	2.2065	4	0.69784	1.8112	3	0.6125	9.52596e-24	0.14796
ebi-a-GCST90027683	5	0.614	34.3596	0.00015-7957423.5090	0.472	0.72423	0.30060-1.74488	0.241	0.65817	0.32688-1.32524	0.64	0.73916	0.22908-2.38498	0.666	0.75035	0.22396-2.51391	-0.3393	0.57423	0.716	2.2065	4	0.69784	1.8114	3	0.61246	9.61321e-24	0.147957
ebi-a-GCST90027712	9	0.611	0.36331	0.00875-15.0805	0.722	1.12931	0.57853-2.20443	0.244	1.38593	0.80052-2.39943	0.811	1.12749	0.43532-2.92026	0.798	1.12749	0.46428-2.73809	0.16631	0.49946	0.989	1.83203	8	0.98574	1.32497	7	0.98776	1.53926e-49	0.31638
ebi-a-GCST90027763	8	0.862	0.82463	0.10331-6.5826	0.377	1.36671	0.68326-2.73380	0.247	1.35985	0.80853-2.28712	0.534	1.40905	0.50382-3.94073	0.53	1.39048	0.52307-3.69633	0.06726	0.64322	0.637	4.99705	7	0.66032	4.75942	6	0.57502	5.54139e-39	0.234948
ebi-a-GCST90027825	10	0.035	0.25496	0.08896-0.7308	0.927	0.98071	0.64733-1.48578	0.265	1.19271	0.87490-1.62598	0.725	0.8737	0.42146-1.81121	0.656	0.86865	0.47740-1.58054	0.2907	0.01738	0.348	10.2158	9	0.3333	1.28687	8	0.99571	3.25698e-45	0.110991
ebi-a-GCST90027599	22	0.566	1.52653	0.36877-6.3191	0.568	0.94174	0.76622-1.15746	0.266	0.91015	0.77112-1.07424	0.803	0.95403	0.66213-1.37463	0.813	0.95683	0.66695-1.37272	-0.09121	0.48081	1	5.8341	21	0.99954	5.31798	20	0.99955	1.35138e-111	0.0811096
ebi-a-GCST90027607	4	0.465	35.7904	0.01437-89168.6243	0.341	1.56827	0.62086-3.96137	0.272	1.57917	0.69894-3.56796	0.822	1.16302	0.34703-3.89773	0.339	2.03773	0.59593-6.96776	-0.26235	0.51401	0.879	0.63308	3	0.88882	0.01464	2	0.99271	1.73183e-19	0.278331
ebi-a-GCST90027458	12	0.279	2.96928	0.46005-19.1643	0.275	0.7741	0.48867-1.22625	0.274	0.81085	0.55671-1.18101	0.592	0.80513	0.37306-1.73760	0.595	0.81476	0.39144-1.69588	-0.14917	0.19383	0.972	3.94029	11	0.97163	2.00007	10	0.99634	1.18605e-56	0.122129
ebi-a-GCST90027682	37	0.433	1.83466	0.40966-8.2166	0.22	1.23646	0.88111-1.73511	0.276	1.15971	0.88849-1.51373	0.492	1.25687	0.65942-2.39560	0.522	1.25687	0.62826-2.51442	-0.03986	0.54624	1	4.78768	36	1	4.41639	35	1	8.34727e-185	0.213568
ebi-a-GCST90027782	11	0.423	0.5441	0.13116-2.2572	0.915	1.01407	0.78571-1.30881	0.277	0.8934	0.72903-1.09484	0.878	1.03212	0.69637-1.52975	0.87	1.03212	0.71425-1.49147	0.11327	0.50744	0.847	5.67095	10	0.84211	5.19449	9	0.81703	3.82112e-51	0.0703838
ebi-a-GCST90027630	15	0.089	0.00057	0.00000-1.6576	0.869	1.04951	0.59226-1.85979	0.278	0.79039	0.51656-1.20940	0.802	1.12384	0.45873-2.75332	0.79	1.12937	0.46950-2.71665	0.62462	0.09839	0.942	7.15022	14	0.92877	3.98059	13	0.9914	3.53845e-72	0.164933
ebi-a-GCST90027846	27	0.999	0.98584	0.00000-14771183956.0000	0.432	1.13554	0.82679-1.55958	0.282	1.14805	0.89297-1.47600	0.673	1.13111	0.64239-1.99166	0.665	1.13111	0.65143-1.96401	0.01861	0.98993	1	0.0233	26	1	0.02314	25	1	4.56918e-129	0.147475
ebi-a-GCST90027646	52	0	62.5001	12.26049-318.6061	0.022	1.4249	1.05171-1.93052	0.294	1.12572	0.90253-1.40409	0.1	2.10335	0.88239-5.01372	0.084	2.07672	0.92140-4.68070	-0.37565	1e-05	0.934	37.4087	51	0.92227	13.6074	50	1	3.35118e-269	0.196669
ebi-a-GCST90027467	26	0.9	0.91288	0.22346-3.7293	0.346	1.13819	0.86959-1.48976	0.295	1.11832	0.90703-1.37884	0.768	1.07759	0.65908-1.76186	0.806	1.06403	0.65120-1.73858	0.02565	0.77743	1	5.97538	25	0.99997	5.89365	24	0.99994	9.21314e-132	0.114018
ebi-a-GCST90027741	5	0.773	1.46108	0.13813-15.4542	0.272	1.49182	0.73098-3.04458	0.298	1.3508	0.76696-2.37908	0.466	1.46973	0.57578-3.75162	0.474	1.47692	0.56144-3.88519	-0.01052	0.95067	0.851	1.30078	4	0.86124	1.29626	3	0.73002	7.29845e-24	0.152537
ebi-a-GCST90027677	5	0.773	1.46032	0.13838-15.4106	0.272	1.49219	0.73102-3.04593	0.298	1.35089	0.76690-2.37957	0.466	1.46977	0.57525-3.75531	0.474	1.47697	0.56094-3.88890	-0.01044	0.95099	0.851	1.3008	4	0.86124	1.29634	3	0.73	7.50043e-24	0.152539
ebi-a-GCST90027655	5	0.773	1.46085	0.13806-15.4573	0.272	1.4919	0.73095-3.04501	0.298	1.35082	0.76692-2.37928	0.466	1.46986	0.57565-3.75312	0.476	1.47345	0.56003-3.87673	-0.01049	0.95078	0.851	1.30087	4	0.86123	1.29638	3	0.72999	7.38176e-24	0.152531
ebi-a-GCST90027629	48	0.021	0.24664	0.07799-0.7800	0.955	1.0091	0.73659-1.38242	0.31	0.88676	0.70301-1.11852	0.945	1.02528	0.50825-2.06825	0.923	1.03781	0.49157-2.19105	0.16608	0.0311	0.998	20.4946	47	0.99973	15.5485	46	0.99999	2.57001e-255	0.161485
ebi-a-GCST90027561	9	0.14	0.16732	0.02036-1.3751	0.111	0.67032	0.40979-1.09648	0.317	0.82036	0.55671-1.20886	0.281	0.6351	0.29392-1.37234	0.282	0.65038	0.31328-1.35020	0.19684	0.17602	0.763	5.11387	8	0.74534	2.84858	7	0.89865	1.33911e-43	0.0999654
ebi-a-GCST90027591	22	0.767	0.8145	0.21385-3.1022	0.064	1.37819	0.98198-1.93426	0.319	1.13	0.88842-1.43726	0.16	1.55714	0.85874-2.82354	0.165	1.57393	0.84839-2.91997	0.04524	0.63099	0.693	17.0697	21	0.70687	16.8317	20	0.66387	3.57605e-105	0.113668
ebi-a-GCST90027795	5	0.824	3.54037	0.00013-99487.4982	0.545	0.84713	0.49521-1.44914	0.323	0.80102	0.51572-1.24416	0.82	1.10039	0.50899-2.37892	0.24	0.598	0.28776-1.24270	-0.39986	0.79446	0.763	1.86079	4	0.76134	1.77978	3	0.61934	6.96449e-26	0.0852321
ebi-a-GCST90027774	11	0.373	0.32549	0.03107-3.4102	0.5	0.82557	0.47299-1.44096	0.332	0.80407	0.51735-1.24968	0.666	0.81257	0.32557-2.02804	0.711	0.83294	0.32528-2.13290	0.09601	0.46206	0.918	4.51383	10	0.92121	3.92374	9	0.91636	2.39978e-50	0.118883
ebi-a-GCST90027854	16	0.061	0.0596	0.00396-0.8980	0.224	0.72944	0.43885-1.21246	0.334	0.82812	0.56487-1.21403	0.421	0.69819	0.29783-1.63673	0.413	0.69819	0.30282-1.60978	0.26074	0.07538	0.961	7.4383	15	0.94433	3.74944	14	0.99679	3.96916e-74	0.128516
ebi-a-GCST90027564	4	0.57	0	0.00000-46236000000000000.0000	0.526	1.31549	0.56381-3.06927	0.346	1.40442	0.69303-2.84603	0.949	0.95946	0.29960-3.07259	0.951	0.95946	0.28685-3.20921	1.86827	0.56427	0.708	1.44244	3	0.69562	0.97372	2	0.61455	4.69114e-19	0.157781
ebi-a-GCST90027560	7	0.234	2.4583	0.66772-9.0506	0.172	1.27524	0.89946-1.80802	0.351	1.14045	0.86546-1.50282	0.336	1.27614	0.80800-2.01550	0.277	1.27614	0.85594-1.90261	-0.19238	0.29043	0.502	5.50487	6	0.48087	4.10827	5	0.53394	3.82821e-33	0.0729263
ebi-a-GCST90027839	20	0.028	0.16576	0.03794-0.7243	0.515	0.84501	0.50901-1.40282	0.352	0.81923	0.53839-1.24656	0.627	0.7322	0.21248-2.52315	0.249	1.97891	0.64273-6.09285	0.19186	0.04118	0.027	33.7874	19	0.01947	26.6323	18	0.08616	1.8501e-94	0.165732
ebi-a-GCST90027765	25	0.532	0.59002	0.11556-3.0125	0.308	0.82677	0.57348-1.19194	0.372	1.13381	0.86066-1.49364	0.523	0.80469	0.41736-1.55148	0.496	0.79659	0.41787-1.51857	0.06179	0.43377	0.883	16.1008	24	0.8844	15.4661	23	0.87716	1.03915e-123	0.128894
ebi-a-GCST90027811	27	0.806	0.82688	0.18401-3.7158	0.141	0.78029	0.56072-1.08583	0.374	0.89395	0.69821-1.14456	0.143	0.6093	0.32052-1.15828	0.165	0.61212	0.31199-1.20097	0.0101	0.91868	0.996	10.8884	26	0.9959	10.8778	25	0.99352	2.48174e-126	0.0996247
ebi-a-GCST90027826	27	0.347	1.21558	0.81553-1.8119	0.679	1.03994	0.86390-1.25185	0.38	1.06135	0.92918-1.21231	0.12	1.42218	0.92608-2.18405	0.144	1.41017	0.90160-2.20563	-0.03414	0.48631	0.58	23.7696	26	0.58914	23.2702	25	0.56179	1.13021e-142	0.0686559
ebi-a-GCST90027552	14	0.298	4.79727	0.28512-80.7165	0.734	1.11372	0.59773-2.07514	0.382	0.80393	0.49271-1.31173	0.743	1.18069	0.44737-3.11604	0.748	1.18069	0.43864-3.17809	-0.20458	0.23185	0.984	4.98741	13	0.97547	3.40145	12	0.99198	1.91954e-67	0.142828
ebi-a-GCST90027500	13	0.074	0.09692	0.00953-0.9854	0.009	1.49847	1.10591-2.03036	0.382	1.13302	0.85614-1.49945	0.062	1.61716	1.02417-2.55349	0.065	1.60978	1.01622-2.55003	0.51256	0.06065	0.04	22.3102	12	0.03419	15.9694	11	0.14227	1.00538e-58	0.088185
ebi-a-GCST90027743	38	0.641	1.48212	0.28798-7.6279	0.453	1.14275	0.80667-1.61885	0.383	1.12842	0.86012-1.48042	0.57	1.21075	0.62958-2.32841	0.595	1.20567	0.60812-2.39039	-0.02322	0.74275	1	5.03931	37	1	4.92991	36	1	1.45482e-186	0.155501
ebi-a-GCST90027657	38	0.641	1.48218	0.28749-7.6415	0.453	1.14264	0.80648-1.61892	0.383	1.12839	0.86011-1.48035	0.57	1.21073	0.62939-2.32902	0.599	1.20565	0.60402-2.40652	-0.02322	0.74295	1	5.03955	37	1	4.93034	36	1	1.41076e-186	0.155453
ebi-a-GCST90027724	21	0.885	1.06478	0.45867-2.4718	0.428	0.90236	0.69993-1.16333	0.388	0.9173	0.75416-1.11573	0.358	0.81186	0.52573-1.25372	0.368	0.80512	0.50777-1.27657	-0.02748	0.72521	1	3.25856	20	0.99999	3.13129	19	0.99998	2.68152e-101	0.0737195
ebi-a-GCST90027524	14	0.202	2.78454	0.62923-12.3225	0.262	1.34577	0.80097-2.26114	0.388	1.19625	0.79638-1.79690	0.416	1.38828	0.64594-2.98374	0.388	1.38828	0.67616-2.85042	-0.11071	0.26957	1	3.1053	13	0.99753	1.76541	12	0.99969	1.96725e-73	0.150433
ebi-a-GCST90027820	7	0.074	0.10961	0.01606-0.7481	0.019	0.4892	0.26922-0.88892	0.389	0.73728	0.36879-1.47398	0.178	0.46687	0.17532-1.24325	0.082	0.47286	0.23382-0.95628	0.28007	0.09761	0.026	15.999	6	0.01376	8.75483	5	0.11925	8.57245e-31	0.12974
ebi-a-GCST90027699	55	0.058	0.08353	0.00678-1.0293	0.245	0.88026	0.70997-1.09139	0.397	0.93136	0.79008-1.09790	0.585	0.88032	0.55880-1.38684	0.585	0.88032	0.55867-1.38716	0.25717	0.06478	1	13.9146	54	1	10.3576	53	1	3.17992e-272	0.0920906
ebi-a-GCST90027797	9	0.332	0.18788	0.00812-4.3491	0.388	1.37814	0.66532-2.85469	0.401	1.27706	0.72181-2.25944	0.443	1.57824	0.52088-4.78192	0.417	1.56758	0.55954-4.39168	0.16897	0.26347	0.934	3.06523	8	0.9302	1.58711	7	0.97914	1.17238e-42	0.167259
ebi-a-GCST90027848	62	0.006	0.59828	0.42067-0.8509	0.965	1.00312	0.87340-1.15210	0.412	0.95701	0.86172-1.06283	0.559	1.09722	0.80534-1.49489	0.524	1.1014	0.81980-1.47973	0.09296	0.00812	1	22.776	61	1	15.2776	60	1	0	0.0705061
ebi-a-GCST90027791	18	0.165	0.39401	0.11252-1.3796	0.228	0.7925	0.54283-1.15700	0.412	0.89204	0.67883-1.17223	0.49	1.25726	0.66530-2.37594	0.389	0.73749	0.37568-1.44778	0.11807	0.20886	0.956	8.5154	17	0.95425	6.80062	16	0.97692	2.05842e-87	0.0857924
ebi-a-GCST90027665	6	0.696	0	0.00000-778000000000000000000000000000000000000000000000000.0000	0.765	1.12934	0.50907-2.50535	0.416	1.30746	0.68527-2.49459	0.849	1.12833	0.34606-3.67892	0.822	1.12833	0.41506-3.06736	2.65286	0.6933	0.896	1.52193	5	0.91052	1.34207	4	0.8542	8.58405e-29	0.145272
ebi-a-GCST90027694	6	0.688	0	0.00000-175000000000000000000000000000000000000000000000000.0000	0.765	1.12933	0.50903-2.50553	0.416	1.30747	0.68523-2.49477	0.849	1.12843	0.34601-3.68008	0.822	1.12843	0.41508-3.06772	2.71481	0.6852	0.896	1.52204	5	0.91051	1.33176	4	0.85596	8.72498e-29	0.145253
ebi-a-GCST90027843	4	0.953	0.8057	0.00144-451.5340	0.876	1.06952	0.46019-2.48565	0.418	1.31662	0.67697-2.56067	0.272	2.13829	0.70524-6.48336	0.932	1.04438	0.41927-2.60149	0.09097	0.89248	0.777	1.16317	3	0.76185	1.13977	2	0.56559	4.14256e-19	0.115024
ebi-a-GCST90027762	6	0.458	0	0.00000-2190000000000000000000000.0000	0.765	1.12891	0.51022-2.49782	0.418	1.30479	0.68525-2.48446	0.851	1.12575	0.34729-3.64914	0.822	1.12575	0.42204-3.00283	3.34859	0.45526	0.897	1.52789	5	0.90983	0.84573	4	0.93221	5.92486e-29	0.144132
ebi-a-GCST90027542	20	0.631	0.51894	0.03743-7.1952	0.632	1.14631	0.65504-2.00602	0.429	1.20357	0.76041-1.90502	0.724	1.21032	0.42546-3.44307	0.733	1.18042	0.46224-3.01447	0.07702	0.53201	0.053	30.2117	19	0.04917	29.5453	18	0.04211	4.6984e-93	0.194645
ebi-a-GCST90027704	14	0.598	0.78687	0.33068-1.8724	0.558	0.89216	0.60894-1.30710	0.433	0.89426	0.67635-1.18238	0.679	0.88189	0.49287-1.57797	0.657	0.88644	0.52683-1.49150	0.01968	0.7652	0.953	6.26111	13	0.93613	6.16777	12	0.90739	3.29111e-67	0.0763172
ebi-a-GCST90027717	17	0.729	1.26871	0.33917-4.7458	0.838	1.02462	0.81201-1.29290	0.44	1.0739	0.89608-1.28702	0.99	0.99722	0.65934-1.50826	0.999	1.00013	0.67008-1.49274	-0.03097	0.80596	0.982	7.0559	16	0.97217	6.99339	15	0.95783	2.50032e-81	0.0654145
ebi-a-GCST90027735	6	0.74	0.50138	0.01111-22.6346	0.427	1.19726	0.76756-1.86751	0.443	1.15131	0.80335-1.64999	0.532	1.21296	0.68977-2.13298	0.516	1.21296	0.70519-2.08634	0.13934	0.68963	0.999	0.1953	5	0.99916	0.01076	4	0.99999	3.37797e-31	0.0740116
ebi-a-GCST90027690	7	0.721	0.35523	0.00164-76.8944	0.822	0.92332	0.46045-1.85151	0.459	1.22711	0.71383-2.10949	0.809	0.87734	0.31832-2.41813	0.788	0.87734	0.35220-2.18550	0.12681	0.66876	0.874	2.49159	6	0.86941	2.28534	5	0.80842	1.46047e-36	0.116166
ebi-a-GCST90027545	7	0.706	0.57408	0.03785-8.7070	0.537	0.78383	0.36155-1.69931	0.461	0.77728	0.39762-1.51942	0.642	0.76678	0.26460-2.22204	0.654	0.78878	0.29413-2.11533	0.03269	0.82958	0.271	7.92201	6	0.24387	7.84136	5	0.1652	3.74388e-32	0.107448
ebi-a-GCST90027577	9	0.369	0.37531	0.05069-2.7790	0.519	1.14093	0.76436-1.70303	0.468	1.14261	0.79716-1.63776	0.739	1.09818	0.64455-1.87108	0.73	1.09818	0.65686-1.83600	0.1976	0.30469	0.192	12.2984	8	0.13838	10.4648	7	0.16373	7.19383e-41	0.079977
ebi-a-GCST90027834	20	0.907	1.06923	0.35122-3.2551	0.034	1.2354	1.01656-1.50136	0.472	1.05654	0.90954-1.22730	0.224	1.24149	0.88599-1.73962	0.225	1.24149	0.88530-1.74099	-0.00288	0.9833	0.991	7.75924	19	0.98893	7.75879	18	0.98201	4.54646e-95	0.060477
ebi-a-GCST90027761	4	0.902	0.91579	0.26510-3.1636	0.601	1.08835	0.79235-1.49491	0.473	1.10378	0.84277-1.44562	0.723	1.08347	0.72325-1.62309	0.725	1.07435	0.74623-1.54675	0.04901	0.79087	0.991	0.10647	3	0.99105	0.015	2	0.99253	1.41429e-19	0.056849
ebi-a-GCST90027803	8	0.194	0.47791	0.17746-1.2870	0.323	0.81728	0.54756-1.21985	0.481	0.89293	0.65189-1.22309	0.494	0.81143	0.45973-1.43220	0.49	0.80994	0.45914-1.42876	0.15912	0.23993	0.922	2.51061	7	0.9263	0.80945	6	0.99182	2.03095e-37	0.0647235
ebi-a-GCST90027771	19	0.548	1.92284	0.23832-15.5142	0.298	1.14817	0.88533-1.48903	0.483	1.07347	0.88056-1.30865	0.492	1.14847	0.78014-1.69070	0.456	1.14847	0.80447-1.63958	-0.10507	0.5897	0.927	10.4863	18	0.91487	10.1842	17	0.89571	9.06053e-100	0.068725
ebi-a-GCST90027638	14	0.468	1.87976	0.36125-9.7813	0.861	1.04981	0.60895-1.80982	0.489	1.16097	0.76074-1.77176	0.811	1.11195	0.47383-2.60947	0.847	1.08453	0.48331-2.43366	-0.06352	0.56455	0.982	4.99706	13	0.97526	4.64607	12	0.96877	4.6191e-71	0.115117
ebi-a-GCST90027559	4	0.136	340.157	3.09134-37429.4452	0.066	0.61118	0.36166-1.03284	0.498	0.80407	0.42771-1.51160	0.231	0.60898	0.31840-1.16475	0.207	0.60898	0.33223-1.11627	-1.061	0.12697	0.155	6.66346	3	0.08343	0.25349	2	0.88096	1.08852e-18	0.0751172
ebi-a-GCST90027669	5	0.695	0.71764	0.15952-3.2285	0.743	0.93087	0.60666-1.42833	0.5	1.12727	0.79590-1.59661	0.755	0.91136	0.52932-1.56912	0.745	0.90899	0.53187-1.55352	0.09817	0.58599	0.376	4.64136	4	0.32611	4.13183	3	0.24758	2.68957e-24	0.0635724
ebi-a-GCST90027608	6	0.111	18.587	1.12622-306.7575	0.878	1.06625	0.46859-2.42619	0.506	1.24294	0.65511-2.35822	0.606	0.67563	0.16711-2.73159	0.594	0.67563	0.17515-2.60621	-0.24805	0.12403	0.482	4.78158	5	0.44311	1.00859	4	0.90849	8.67953e-28	0.107911
ebi-a-GCST90027570	11	0.723	1.43663	0.20593-10.0224	0.458	1.28802	0.65965-2.51499	0.507	0.84284	0.50861-1.39672	0.616	1.39315	0.39763-4.88104	0.577	1.39315	0.45185-4.29538	-0.05833	0.59095	0.76	6.36917	10	0.78335	6.05864	9	0.73404	1.10317e-53	0.0970678
ebi-a-GCST90027548	18	0.198	5.04367	0.47452-53.6096	0.689	1.1183	0.64708-1.93270	0.518	0.87554	0.58538-1.30951	0.75	1.1632	0.46640-2.90102	0.763	1.15762	0.45346-2.95526	-0.16953	0.16	0.973	7.62475	17	0.97393	5.4533	16	0.993	2.12561e-87	0.0976831
ebi-a-GCST90027453	34	0.315	14.0239	0.08764-2244.0808	0.079	1.40847	0.96108-2.06410	0.518	1.0977	0.82747-1.45618	0.201	1.67953	0.77073-3.65994	0.243	1.66767	0.71702-3.87871	-0.20301	0.33184	0.981	18.5551	33	0.97975	17.5842	32	0.98173	3.81115e-171	0.106597
ebi-a-GCST90027810	33	0.341	1.6678	0.59155-4.7022	0.875	1.01833	0.81272-1.27596	0.544	1.0576	0.88257-1.26735	0.896	0.97169	0.63473-1.48753	0.886	0.97169	0.65843-1.43398	-0.06717	0.38843	1	2.6729	32	1	1.90771	31	1	1.13005e-167	0.0684708
ebi-a-GCST90027681	33	0.344	1.66565	0.58898-4.7105	0.876	1.01809	0.81290-1.27508	0.545	1.05742	0.88252-1.26698	0.897	0.97236	0.63703-1.48423	0.888	0.97236	0.65975-1.43311	-0.06704	0.39102	1	2.67469	32	1	1.91789	31	1	2.71288e-168	0.0684166
ebi-a-GCST90027726	33	0.343	1.66941	0.58878-4.7334	0.876	1.01801	0.81292-1.27485	0.545	1.0574	0.88254-1.26691	0.897	0.97213	0.63651-1.48473	0.888	0.97213	0.65847-1.43520	-0.06739	0.38989	1	2.6748	32	1	1.91434	31	1	2.94372e-168	0.0683996
ebi-a-GCST90027800	5	0.569	0.4768	0.04907-4.6330	0.81	1.06011	0.65816-1.70752	0.548	1.12844	0.76066-1.67405	0.893	1.0459	0.56720-1.92863	0.982	1.00785	0.53834-1.88683	0.16698	0.50562	0.942	0.65491	4	0.95677	0.08637	3	0.99342	6.63018e-25	0.0636675
ebi-a-GCST90027755	37	0.021	1.89051	1.12709-3.1710	0.53	1.06613	0.87316-1.30175	0.558	1.04268	0.90655-1.19925	0.358	1.2073	0.81240-1.79416	0.514	1.12216	0.79652-1.58094	-0.12209	0.0252	0.438	37.5558	36	0.39775	32.0872	35	0.60947	1.23531e-192	0.0619912
ebi-a-GCST90027468	4	0.885	2.30311	0.00010-51842.4562	0.648	0.88741	0.53123-1.48241	0.56	0.87777	0.56650-1.36006	0.758	0.89034	0.45340-1.74836	0.724	0.89034	0.49543-1.60004	-0.14445	0.86765	1	0.04015	3	0.99789	0.00449	2	0.99776	1.16142e-22	0.0610702
ebi-a-GCST90027459	15	0.519	0.66979	0.20492-2.1892	0.405	0.83236	0.54047-1.28188	0.561	0.90316	0.64071-1.27311	0.58	0.83548	0.44858-1.55609	0.594	0.84442	0.46022-1.54936	0.03485	0.6139	1	1.6791	14	0.99997	1.4119	13	0.99997	1.08926e-73	0.0736465
ebi-a-GCST90027780	18	0.001	297.695	16.98538-5217.5643	0.033	1.92601	1.05489-3.51650	0.575	1.13127	0.73531-1.74045	0.197	2.34757	0.67536-8.16027	0.139	2.32541	0.80104-6.75059	-0.55476	0.00141	0.273	20.4752	17	0.25065	5.64918	16	0.99146	2.3882e-82	0.101444
ebi-a-GCST90027798	16	0.662	1.35173	0.35976-5.0789	0.963	1.00563	0.79251-1.27606	0.578	1.05431	0.87515-1.27015	0.979	0.99441	0.65429-1.51135	0.99	0.99719	0.65524-1.51758	-0.04641	0.71572	0.982	6.38714	15	0.97249	6.24901	14	0.95982	7.931e-77	0.0578221
ebi-a-GCST90027852	29	0.001	82.5615	9.25550-736.4710	0.162	0.71664	0.44949-1.14256	0.58	0.89018	0.58981-1.34352	0.207	2.67385	0.60171-11.88194	0.23	2.57109	0.56880-11.62177	-0.45349	0.00034	<0.001	60.7181	28	0.00033	37.3933	27	0.08796	3.06827e-144	0.113635
ebi-a-GCST90027531	9	0.912	0.86996	0.08106-9.3364	0.696	1.15001	0.57055-2.31799	0.58	1.17364	0.66529-2.07041	0.735	1.2255	0.39263-3.82507	0.731	1.1935	0.45142-3.15548	0.03646	0.8063	0.829	4.17778	8	0.84074	4.11292	7	0.76668	1.34687e-43	0.0961994
ebi-a-GCST90027475	38	0.304	2.18203	0.50418-9.4435	0.535	0.91585	0.69354-1.20941	0.582	0.94259	0.76368-1.16342	0.231	1.41542	0.80968-2.47433	0.301	1.3533	0.76907-2.38132	-0.08794	0.26399	0.999	17.3744	37	0.9975	16.0868	36	0.99831	5.08399e-203	0.072481
ebi-a-GCST90027529	8	0.915	1.29168	0.01431-116.6156	0.656	1.19639	0.54329-2.63460	0.613	1.15323	0.66365-2.00398	0.375	0.5371	0.14827-1.94559	0.356	0.54671	0.16507-1.81065	-0.011	0.96191	0.411	7.30476	7	0.39785	7.30174	6	0.29384	7.64373e-40	0.0831517
ebi-a-GCST90027671	19	0.694	0.84317	0.36582-1.9434	0.615	0.91913	0.66195-1.27623	0.618	0.93856	0.73161-1.20404	0.848	0.94683	0.54623-1.64122	0.743	0.92148	0.56959-1.49078	0.01537	0.79528	0.984	8.01157	18	0.97846	7.9421	17	0.96777	1.67249e-89	0.0616881
ebi-a-GCST90027710	4	0.551	44.2822	0.00127-1547840.9360	0.435	1.48146	0.55250-3.97230	0.638	1.32929	0.40619-4.35020	0.511	1.73418	0.40668-7.39488	0.541	1.61561	0.41157-6.34207	-0.33946	0.576	0.099	8.07144	3	0.04456	6.6204	2	0.03651	1.05288e-18	0.122734
ebi-a-GCST90027549	32	0.021	0.3117	0.12213-0.7955	0.116	0.69873	0.44678-1.09275	0.64	0.92241	0.65728-1.29448	0.304	0.63068	0.26563-1.49742	0.268	0.64105	0.29622-1.38731	0.1503	0.02109	1	7.14573	31	1	1.21996	30	1	6.63701e-153	0.0812733
ebi-a-GCST90027766	14	0.311	1.60517	0.66795-3.8574	0.861	1.04055	0.66727-1.62263	0.644	0.91954	0.64399-1.31301	0.769	1.1178	0.53900-2.31815	0.768	1.11433	0.55177-2.25046	-0.07784	0.19793	1	2.40432	13	0.99937	0.54673	12	1	1.92099e-76	0.0669144
ebi-a-GCST90027573	15	0.94	0.89502	0.05307-15.0959	0.223	0.67845	0.36330-1.26697	0.646	1.1313	0.66790-1.91621	0.335	0.59616	0.21611-1.64458	0.268	0.60875	0.26202-1.41431	0.02414	0.87098	0.146	20.103	14	0.12693	20.0607	13	0.09371	7.2366e-68	0.0925749
ebi-a-GCST90027512	5	0.565	0.48408	0.05340-4.3883	0.834	1.09181	0.48114-2.47757	0.65	1.15717	0.61563-2.17507	0.98	0.98507	0.31945-3.03763	0.951	1.03647	0.35724-3.00712	0.10433	0.47788	0.626	2.77218	4	0.59664	2.1182	3	0.54824	8.54663e-24	0.070002
ebi-a-GCST90027674	48	0.768	0.68156	0.05401-8.6007	0.708	0.94896	0.72134-1.24840	0.651	0.95082	0.76393-1.18342	0.796	0.92748	0.52613-1.63497	0.805	0.92748	0.51238-1.67887	0.03382	0.79728	1	8.77065	47	1	8.7039	46	1	2.29056e-270	0.0711258
ebi-a-GCST90027535	8	0.358	4.73213	0.22140-101.1413	0.612	1.24489	0.53382-2.90311	0.652	0.83801	0.38918-1.80444	0.562	1.70326	0.30664-9.46098	0.526	1.65981	0.37508-7.34503	-0.1926	0.29662	0.179	10.6853	7	0.15295	8.77495	6	0.18664	2.48116e-36	0.0842934
ebi-a-GCST90027659	10	0.839	1.24511	0.16001-9.6889	0.952	1.02001	0.53275-1.95291	0.662	1.11441	0.68596-1.81047	0.975	1.01679	0.37555-2.75292	0.974	1.01679	0.37827-2.73314	-0.01319	0.91586	0.635	6.91129	9	0.64635	6.8994	8	0.54752	1.38571e-48	0.0723481
ebi-a-GCST90027540	31	0.446	0.03894	0.00001-146.5554	0.414	1.15413	0.81817-1.62803	0.675	1.06131	0.80352-1.40180	0.381	1.32935	0.70949-2.49077	0.383	1.32935	0.70811-2.49563	0.27674	0.4375	1	2.80103	30	1	2.1812	29	1	5.50499e-157	0.0696794
ebi-a-GCST90027716	4	0.794	0.48877	0.00436-54.7839	0.918	0.94573	0.32788-2.72779	0.677	0.82861	0.34236-2.00545	0.795	1.21829	0.31077-4.77592	0.773	1.2428	0.32121-4.80858	0.05592	0.84412	0.764	1.20127	3	0.7527	1.15146	2	0.56229	2.08611e-20	0.0699333
ebi-a-GCST90027786	11	0.025	0.02159	0.00132-0.3533	0.051	1.3667	0.99919-1.86937	0.694	1.05731	0.80118-1.39533	0.167	1.43025	0.89321-2.29018	0.142	1.42622	0.92170-2.20690	0.74464	0.02294	0.126	15.6533	10	0.11	8.15971	9	0.51813	8.22504e-50	0.0558479
ebi-a-GCST90027566	10	0.526	0.51349	0.07156-3.6847	0.869	0.94556	0.48628-1.83861	0.707	1.10906	0.64688-1.90144	0.874	0.91997	0.33910-2.49589	0.847	0.90375	0.33209-2.45950	0.0803	0.44888	0.975	2.63751	9	0.97695	2.00354	8	0.9809	4.72166e-50	0.0704805
ebi-a-GCST90027703	25	0	0.00399	0.00059-0.0267	0.844	1.03639	0.72613-1.47921	0.708	1.06175	0.77619-1.45238	0.087	2.22092	0.92538-5.33018	0.056	2.20166	1.01888-4.75751	0.72863	1e-05	0.003	47.112	24	0.00325	13.5584	23	0.93882	1.02249e-110	0.0652627
ebi-a-GCST90027493	6	0.915	1.07531	0.30941-3.7370	0.972	0.99504	0.75254-1.31567	0.71	1.04347	0.83373-1.30598	0.855	0.96267	0.65344-1.41824	0.83	0.95848	0.66312-1.38538	-0.01019	0.96396	0.921	1.42537	5	0.92152	1.42306	4	0.84018	7.91556e-30	0.051888
ebi-a-GCST90027627	4	0.904	0.68468	0.00294-159.1824	0.438	1.47093	0.55478-3.89998	0.715	1.16922	0.50536-2.70517	0.517	1.67804	0.41994-6.70528	0.399	1.75026	0.57227-5.35304	0.07627	0.86276	0.358	3.71733	3	0.29365	3.64731	2	0.16143	1.09303e-20	0.0702059
ebi-a-GCST90027528	4	0.402	0.12067	0.00238-6.1183	0.512	0.70074	0.24228-2.02676	0.717	0.84959	0.35201-2.05049	0.483	0.53291	0.11356-2.50091	0.549	0.58583	0.12354-2.77804	0.18883	0.4227	0.493	2.57668	3	0.46159	1.57696	2	0.45454	3.86388e-20	0.0653365
ebi-a-GCST90027601	5	0.133	42.0511	1.18008-1498.4576	0.659	0.822	0.34412-1.96347	0.727	1.12617	0.57795-2.19443	0.242	2.74946	0.64739-11.67690	0.44	0.67071	0.26863-1.67461	-0.53932	0.13693	0.379	4.3951	4	0.35517	0.32315	3	0.95562	2.48626e-26	0.0644317
ebi-a-GCST90027626	58	0.007	0.32794	0.15087-0.7128	0.505	1.0524	0.90571-1.22285	0.729	0.98106	0.88057-1.09301	0.728	1.05751	0.77321-1.44633	0.729	1.05751	0.77197-1.44867	0.21932	0.00713	1	20.0895	57	1	12.2863	56	1	7.45413e-302	0.0534591
ebi-a-GCST90027596	8	0.291	0.27712	0.03155-2.4339	0.488	0.79096	0.40752-1.53519	0.733	0.89573	0.47570-1.68662	0.411	0.57087	0.16247-2.00589	0.798	0.85834	0.27893-2.64134	0.18977	0.31162	0.038	16.657	7	0.01975	13.8418	6	0.03145	4.71767e-39	0.065389
ebi-a-GCST90027833	12	0.346	0.58389	0.20094-1.6967	0.921	0.98589	0.74356-1.30720	0.74	0.96125	0.76130-1.21371	0.958	0.98792	0.63216-1.54390	0.963	0.98917	0.63133-1.54985	0.09102	0.37001	1	1.20046	11	0.99987	0.31933	10	1	2.43701e-58	0.0529551
ebi-a-GCST90027635	28	0.334	3.70624	0.27229-50.4472	0.013	1.70392	1.12015-2.59194	0.741	0.94658	0.68375-1.31045	0.104	1.72241	0.91497-3.24236	0.207	1.71301	0.75759-3.87333	-0.19148	0.31127	0.009	46.4552	27	0.01136	44.6249	26	0.01294	1.11885e-137	0.0639478
ebi-a-GCST90027812	5	0.567	2.88109	0.11346-73.1603	0.439	1.36291	0.62174-2.98762	0.745	1.11286	0.58457-2.11855	0.555	1.44042	0.47335-4.38324	0.558	1.4354	0.47321-4.35404	-0.11697	0.59775	0.808	1.56309	4	0.81541	1.21712	3	0.7489	1.72659e-23	0.0599904
ebi-a-GCST90027654	13	0.857	1.33101	0.06399-27.6840	0.896	1.03988	0.57861-1.86890	0.748	1.07882	0.67937-1.71314	0.926	1.04441	0.42669-2.55642	0.925	1.04441	0.43010-2.53617	-0.0219	0.8933	1	1.2754	12	0.99995	1.25655	11	0.99984	3.80153e-63	0.0633089
ebi-a-GCST90027740	13	0.857	1.33085	0.06400-27.6746	0.896	1.03989	0.57858-1.86901	0.748	1.07883	0.67934-1.71323	0.926	1.04443	0.42662-2.55696	0.925	1.04443	0.43008-2.53634	-0.02188	0.89335	1	1.2754	12	0.99995	1.25658	11	0.99984	3.91594e-63	0.0633085
ebi-a-GCST90027502	20	0.348	0.43484	0.07988-2.3672	0.809	1.05926	0.66375-1.69046	0.748	0.94215	0.65469-1.35584	0.756	1.12923	0.53013-2.40537	0.75	1.1232	0.55458-2.27481	0.06931	0.37191	0.999	4.57656	19	0.9997	3.738	18	0.99986	3.49759e-95	0.0608758
ebi-a-GCST90027576	12	0.184	0.14044	0.00947-2.0828	0.715	1.10097	0.65677-1.84559	0.752	1.06663	0.71527-1.59059	0.696	1.19585	0.49852-2.86860	0.714	1.17682	0.50397-2.74799	0.22116	0.16706	0.705	8.2536	11	0.69042	6.03336	10	0.81245	2.42217e-55	0.058592
ebi-a-GCST90027623	19	0.186	4.01665	0.55728-28.9503	0.411	0.83291	0.53876-1.28768	0.753	0.94913	0.68603-1.31313	0.565	0.81157	0.40353-1.63221	0.592	0.82314	0.40890-1.65702	-0.14561	0.16489	0.572	16.5745	18	0.55252	14.4681	17	0.63373	1.26699e-88	0.0580609
ebi-a-GCST90027772	40	0.501	0.28467	0.00757-10.7084	0.355	0.88937	0.69370-1.14024	0.761	0.96995	0.79679-1.18075	0.609	0.88053	0.54291-1.42811	0.606	0.88053	0.54534-1.42175	0.12846	0.5111	1	8.10758	39	1	7.66752	38	1	2.42085e-190	0.0556798
ebi-a-GCST90027580	8	0.381	2.03762	0.46639-8.9023	0.863	0.97008	0.68666-1.37050	0.762	1.0434	0.79299-1.37289	0.979	0.99326	0.61323-1.60879	0.899	0.97077	0.62404-1.51015	-0.14606	0.40011	0.995	1.08149	7	0.9934	0.2616	6	0.99966	1.26083e-39	0.0525068
ebi-a-GCST90027796	48	0.212	0.24826	0.02876-2.1429	0.258	1.20923	0.86997-1.68079	0.762	1.0385	0.81317-1.32628	0.498	1.23305	0.67549-2.25082	0.487	1.23305	0.68660-2.21439	0.13435	0.19678	0.976	29.3752	47	0.97941	27.6597	46	0.98525	2.29341e-234	0.0615608
ebi-a-GCST90027447	11	0.437	2.23835	0.32150-15.5841	0.599	0.85002	0.46414-1.55672	0.781	0.93192	0.56641-1.53329	0.742	0.84782	0.32595-2.20526	0.73	0.84782	0.34128-2.10617	-0.11591	0.3837	1	1.46036	10	0.99905	0.62184	9	0.99992	1.6046e-56	0.058885
ebi-a-GCST90027517	12	0.944	0.92105	0.09943-8.5319	0.707	1.15584	0.54363-2.45749	0.783	1.07922	0.62696-1.85770	0.209	0.43663	0.12930-1.47447	0.273	1.99688	0.61731-6.45950	0.01752	0.88845	0.727	7.68428	11	0.74128	7.66358	10	0.66166	4.39072e-57	0.062524
ebi-a-GCST90027742	7	0.489	2.42802	0.23646-24.9316	0.782	1.10496	0.54550-2.23819	0.797	0.93232	0.54699-1.58909	0.771	1.15696	0.45262-2.95739	0.763	1.15284	0.47683-2.78724	-0.12353	0.44566	0.946	1.4004	6	0.96583	0.7157	5	0.9821	1.87668e-35	0.0554701
ebi-a-GCST90027656	7	0.489	2.42782	0.23647-24.9258	0.782	1.10495	0.54551-2.23813	0.797	0.93232	0.54700-1.58907	0.771	1.15697	0.45263-2.95736	0.763	1.15285	0.47688-2.78702	-0.12353	0.44567	0.946	1.4004	6	0.96583	0.71574	5	0.98209	1.86895e-35	0.05547
ebi-a-GCST90027756	6	0.13	16.77	0.92128-305.2615	0.358	0.84798	0.59658-1.20533	0.798	1.03582	0.79136-1.35580	0.559	0.8446	0.49755-1.43373	0.554	0.8446	0.50114-1.42345	-0.65057	0.1319	0.627	3.60719	5	0.60723	0.0389	4	0.99981	6.27356e-28	0.0512194
ebi-a-GCST90027594	69	0.648	1.40817	0.32631-6.0769	0.364	0.89475	0.70389-1.13736	0.799	1.02359	0.85572-1.22438	0.685	0.89354	0.51951-1.53687	0.649	0.89354	0.55186-1.44679	-0.02988	0.66798	1	17.8056	68	1	17.6199	67	1	0	0.057144
ebi-a-GCST90027718	5	0.71	1.78917	0.10985-29.1398	0.789	1.11526	0.50067-2.48427	0.802	1.08767	0.56343-2.09968	0.858	1.10826	0.38491-3.19096	0.748	1.18851	0.44521-3.17278	-0.05313	0.74287	0.988	0.21625	4	0.99456	0.08683	3	0.99337	2.61775e-25	0.056359
ebi-a-GCST90027516	6	0.516	86.7193	0.00039-19154245.9600	0.482	1.33199	0.59892-2.96231	0.803	0.92152	0.48530-1.74983	0.595	1.3426	0.48551-3.71275	0.578	1.3426	0.50888-3.54228	-0.40616	0.50863	0.445	5.25709	5	0.38532	4.64662	4	0.32551	1.39099e-28	0.0560765
ebi-a-GCST90027692	4	0.836	1.22139	0.23044-6.4738	0.558	1.10887	0.78453-1.56728	0.803	1.0381	0.77372-1.39283	0.606	1.13824	0.73193-1.77011	0.635	1.12482	0.72625-1.74211	-0.03783	0.86401	0.783	1.32092	3	0.72417	1.28323	2	0.52644	2.12698e-19	0.0509233
ebi-a-GCST90027732	10	0.226	0.18188	0.01421-2.3286	0.674	1.13431	0.63032-2.04128	0.804	0.9406	0.57975-1.52608	0.8	1.13764	0.43248-2.99253	0.778	1.13764	0.47739-2.71103	0.1588	0.23424	0.951	3.38843	9	0.94689	1.73327	8	0.98813	6.11294e-47	0.0556757
ebi-a-GCST90027818	5	0.494	7.93367	0.04274-1472.7936	0.763	1.08441	0.64108-1.83433	0.806	0.94981	0.63016-1.43162	0.507	1.33743	0.61086-2.92820	0.513	1.33743	0.60450-2.95899	-0.39234	0.48276	0.589	2.92979	4	0.56964	2.29157	3	0.51414	1.13456e-23	0.0520094
ebi-a-GCST90027538	62	0.73	0.89659	0.48430-1.6599	0.453	1.04757	0.92793-1.18263	0.815	1.01132	0.92023-1.11143	0.736	1.04769	0.80015-1.37181	0.736	1.04769	0.80034-1.37147	0.03918	0.69955	1	13.303	61	1	13.1526	60	1	0	0.0514143
ebi-a-GCST90027578	9	0.426	0.48292	0.08922-2.6140	0.536	0.81543	0.42746-1.55553	0.816	0.94103	0.56387-1.57047	0.542	0.72373	0.26771-1.95654	0.601	0.75881	0.28118-2.04780	0.07723	0.44324	0.946	2.92697	8	0.93886	2.26676	7	0.94361	1.24551e-43	0.0551831
ebi-a-GCST90027708	9	0.491	3.99142	0.09562-166.6192	0.456	1.30451	0.64846-2.62430	0.824	1.06163	0.62758-1.79587	0.448	1.49932	0.55489-4.05115	0.48	1.46771	0.53242-4.04598	-0.12066	0.50498	0.941	2.82319	8	0.94496	2.32952	7	0.93938	2.88909e-43	0.0556099
ebi-a-GCST90027515	20	0.819	0.74493	0.06223-8.9179	0.73	0.94183	0.67027-1.32341	0.824	0.96977	0.73972-1.27136	0.84	0.94241	0.53495-1.66022	0.839	0.94241	0.53648-1.65549	0.04013	0.83641	1	2.47078	19	1	2.42689	18	0.99999	3.10013e-100	0.0530832
ebi-a-GCST90027632	4	0.585	7.72045	0.01564-3811.8154	0.646	1.26818	0.46036-3.49357	0.829	1.13462	0.36046-3.57140	0.859	1.14912	0.28101-4.69906	0.813	1.16705	0.36073-3.77567	-0.23749	0.59877	0.129	7.59184	3	0.05525	6.36965	2	0.04139	8.75629e-19	0.061824
ebi-a-GCST90027813	5	0.646	9.84529	0.00146-66595.8639	0.704	1.17909	0.50347-2.76137	0.836	1.07412	0.54626-2.11207	0.734	1.21543	0.42552-3.47166	0.73	1.21964	0.42628-3.48956	-0.19531	0.65533	0.987	0.2718	4	0.99156	0.02794	3	0.99877	2.22673e-24	0.0543698
ebi-a-GCST90027714	47	0.199	0.24942	0.03086-2.0158	0.223	1.20836	0.89139-1.63803	0.862	1.0222	0.79783-1.30968	0.503	1.23646	0.66758-2.29012	0.524	1.22843	0.65580-2.30109	0.13213	0.18942	0.971	28.6973	46	0.97862	26.9218	45	0.98507	8.20519e-228	0.0537296
ebi-a-GCST90027675	47	0.195	0.24555	0.03025-1.9929	0.223	1.20835	0.89143-1.63795	0.863	1.02206	0.79776-1.30943	0.502	1.23693	0.66839-2.28907	0.522	1.22889	0.65705-2.29844	0.1336	0.18557	0.971	28.6976	46	0.97862	26.8903	45	0.98524	6.55243e-228	0.0536831
ebi-a-GCST90027753	5	0.22	0.18716	0.02236-1.5665	0.477	1.2041	0.72167-2.00902	0.873	1.03128	0.70754-1.50316	0.582	1.21614	0.64077-2.30815	0.577	1.21614	0.64565-2.29070	0.29632	0.20796	0.638	2.5783	4	0.63067	0.01918	3	0.9993	3.26107e-24	0.0507958
ebi-a-GCST90027767	6	0.925	0.73915	0.00197-276.6811	0.402	0.84673	0.57389-1.24928	0.877	0.96747	0.63679-1.46987	0.379	0.65534	0.27789-1.54544	0.333	0.66752	0.31879-1.39772	0.05012	0.93312	0.107	10.4033	5	0.06458	10.3826	4	0.03445	1.73693e-27	0.0510254
ebi-a-GCST90027518	7	0.31	0.19829	0.01199-3.2797	0.983	1.00795	0.48981-2.07422	0.88	0.95447	0.52198-1.74530	0.984	1.0114	0.34948-2.92707	0.929	0.95573	0.36571-2.49764	0.1592	0.31205	0.888	2.34621	6	0.88527	1.08275	5	0.95562	6.53913e-35	0.052452
ebi-a-GCST90027621	15	0.648	1.91255	0.12576-29.0854	0.983	0.99398	0.56674-1.74329	0.888	1.03095	0.67352-1.57807	0.382	0.64713	0.25136-1.66605	0.402	0.65025	0.24503-1.72559	-0.06069	0.65974	0.983	5.38092	14	0.97977	5.17794	13	0.97106	9.93523e-71	0.0523268
ebi-a-GCST90027816	22	0.258	1.87503	0.65141-5.3971	0.48	1.12958	0.80562-1.58380	0.904	1.01644	0.77880-1.32660	0.679	1.14364	0.61044-2.14257	0.696	1.14364	0.58817-2.22369	-0.0785	0.25458	0.916	12.6431	21	0.92061	11.2672	20	0.939	7.20829e-107	0.0509944
ebi-a-GCST90027611	5	0.497	2.99199	0.18484-48.4301	0.987	1.00905	0.34130-2.98325	0.92	1.04268	0.46317-2.34725	0.793	0.81675	0.19861-3.35872	0.773	0.80982	0.21249-3.08635	-0.10733	0.49442	0.747	2.07798	4	0.72142	1.47615	3	0.68779	9.16046e-24	0.0514458
ebi-a-GCST90027661	8	0.389	0.45017	0.08354-2.4258	0.358	1.18471	0.82558-1.70007	0.927	0.98644	0.73752-1.31938	0.541	1.20166	0.68630-2.10401	0.537	1.1994	0.69253-2.07724	0.14556	0.38978	0.798	3.82842	7	0.79931	2.96944	6	0.81267	1.18966e-38	0.050243
ebi-a-GCST90027687	8	0.394	0.45245	0.08333-2.4567	0.358	1.18465	0.82544-1.70017	0.929	0.98679	0.73774-1.31993	0.546	1.20139	0.68129-2.11852	0.537	1.19912	0.69259-2.07612	0.14463	0.3945	0.798	3.82885	7	0.79927	2.98795	6	0.81036	3.44864e-39	0.0502338
ebi-a-GCST90027806	19	0.166	0.48496	0.18215-1.2912	0.855	1.02406	0.79350-1.32161	0.929	0.99124	0.81586-1.20432	0.648	1.11312	0.70833-1.74924	0.606	1.13097	0.71430-1.79070	0.14604	0.16252	0.996	6.54703	18	0.99342	4.41543	17	0.999	1.15451e-90	0.0502378
ebi-a-GCST90027722	21	0.179	0.50259	0.19140-1.3197	0.677	1.05474	0.82097-1.35509	0.936	1.00808	0.82903-1.22579	0.691	1.09885	0.69465-1.73825	0.584	1.12631	0.74053-1.71305	0.14358	0.1653	0.999	6.34197	20	0.99835	4.25971	19	0.99983	1.79734e-99	0.050221
ebi-a-GCST90027501	20	0.576	1.69945	0.27410-10.5368	0.458	0.83608	0.52102-1.34163	0.938	1.0143	0.71026-1.44850	0.38	0.67518	0.28696-1.58860	0.412	0.71566	0.32768-1.56305	-0.04692	0.57885	0.98	8.91203	19	0.97491	8.59247	18	0.96845	2.85461e-95	0.0506689
ebi-a-GCST90027841	11	0.692	0.72858	0.15985-3.3207	0.351	0.80864	0.51754-1.26348	0.959	1.00925	0.71024-1.43414	0.577	0.8119	0.39963-1.64947	0.561	0.8119	0.41169-1.60117	0.05134	0.67531	0.866	5.35361	10	0.86634	5.16626	9	0.81958	3.47905e-50	0.050148
ebi-a-GCST90027827	65	0.212	0.7668	0.50763-1.1583	0.976	1.00232	0.86171-1.16587	0.96	1.00298	0.89370-1.12561	0.558	0.89959	0.63262-1.27921	0.526	0.90149	0.65564-1.23954	0.05946	0.18866	1	7.54259	64	1	5.77649	63	1	0	0.0500931
ebi-a-GCST90027530	20	0.059	49.4742	1.10857-2207.9716	0.402	1.21348	0.77158-1.90846	0.974	0.99433	0.70338-1.40564	0.295	1.59367	0.68258-3.72082	0.288	1.60658	0.68660-3.75926	-0.33453	0.05801	0.799	13.7412	19	0.79857	9.64238	18	0.94296	1.61131e-99	0.0501105
ebi-a-GCST90027519	10	0.623	0.57875	0.07126-4.7005	0.319	1.48594	0.68136-3.24057	0.979	0.99198	0.55097-1.78598	0.406	1.88455	0.45381-7.82593	0.403	1.88455	0.45776-7.75839	0.05541	0.61228	0.376	9.89505	9	0.35905	9.56267	8	0.29707	1.05072e-44	0.050101
ebi-a-GCST90027526	5	0.79	1.41885	0.13417-15.0043	0.765	0.87498	0.36494-2.09787	0.989	0.99502	0.49755-1.98989	0.686	0.7682	0.23413-2.52051	0.666	0.76436	0.24654-2.36974	-0.03996	0.77788	0.884	1.09922	4	0.8944	1.00405	3	0.80027	4.95033e-25	0.0500205
ebi-a-GCST90027773	16	0.563	1.69112	0.29747-9.6140	0.435	0.88124	0.64141-1.21075	0.995	1.00085	0.78225-1.28052	0.685	0.88799	0.50554-1.55977	0.663	0.88799	0.52610-1.49884	-0.08995	0.55962	0.99	5.53469	15	0.98655	5.1775	14	0.98319	6.37789e-76	0.0500019

## Sheet: S7.2
The resluts of forward univariable MR analysis between gut microbiota phenotypes and the risk of HCC in UK Bio-Bank database.
id	nsnp	MR-Egger			Weighted median			Inverse variance weighted			Simple mode			Weighted mode			MR-Egger intercept		MR-PRESSO global	MR-IVW			MR-Egeer			steiger_test_pval	power
		p_value	OR	95% OR	p_value	OR	95% OR	p_value	OR	95% OR	p_value	OR	95% OR	p_value	OR	95% OR	egger intercept	p_value	p_value	Q	Q_df	Q_pval	Q	Q_df	Q_pval
ebi-a-GCST90027802	90	0	1.54284e+06	20600.97889-115546082.8742	0	12.6267	7.83784-20.34168	0	8.98084	6.21402-12.97958	0	12.8111	3.71936-44.12735	0	12.8111	4.53302-36.20669	-1.13629	0	0.986	65.5803	89	0.97043	35.3961	88	1	0	1
ebi-a-GCST90027719	90	0	16074.1	334.58748-772226.0448	0	12.7939	7.71280-21.22223	0	8.61034	5.95318-12.45350	0	13.3688	4.12363-43.34178	0	13.3688	4.41015-40.52591	-0.71052	0.00024	0.972	68.8796	89	0.94392	54.2103	88	0.99826	0	1
ebi-a-GCST90027595	119	0.744	0.72509	0.10575-4.9718	0	0.08355	0.05410-0.12902	0	0.17279	0.12635-0.23631	0	0.06814	0.02447-0.18970	0	0.06814	0.01971-0.23558	-0.14413	0.14161	0.754	111.237	118	0.65737	109.048	117	0.68733	0	0.999567
ebi-a-GCST90027479	180	0.067	0.05927	0.00293-1.2006	0	6.23534	4.40270-8.83081	0	3.61887	2.81645-4.64992	0	6.45766	2.37516-17.55727	0	6.45766	2.33742-17.84072	0.31456	0.00787	1	114.5	179	0.99995	107.273	178	0.99999	0	1
ebi-a-GCST90027478	317	0.005	8.99185	1.99542-40.5195	0	0.43241	0.36161-0.51706	0	0.50291	0.43842-0.57688	0.007	0.42906	0.23377-0.78749	0.006	0.42906	0.23695-0.77692	-0.32235	0.00019	1	47.9403	316	1	33.7274	315	1	0	0.999426
ebi-a-GCST90027639	180	0.409	2.55786	0.27704-23.6158	0	0.28012	0.20279-0.38695	0	0.30056	0.23481-0.38470	0.018	0.32849	0.13183-0.81855	0.015	0.32849	0.13539-0.79703	-0.17478	0.05906	1	37.6111	179	1	34.0014	178	1	0	0.999792
ebi-a-GCST90027764	97	0	0.04972	0.01595-0.1550	0	0.32753	0.24165-0.44392	0	0.33452	0.26634-0.42015	0.001	0.21268	0.09131-0.49535	0	0.21268	0.10103-0.44770	0.29994	0.00115	1	26.0959	96	1	14.8477	95	1	0	0.97556
ebi-a-GCST90027696	99	0	0.0499	0.01649-0.1510	0	0.33626	0.24903-0.45406	0	0.33853	0.27012-0.42427	0	0.21333	0.09597-0.47418	0	0.21333	0.09293-0.48972	0.29892	0.0008	1	26.664	98	1	14.6812	97	1	0	0.976359
ebi-a-GCST90027723	30	0.519	2.44293	0.16716-35.7012	0	6.44434	3.91621-10.60453	0	5.74353	3.95558-8.33966	0.001	6.60159	2.52570-17.25503	0	6.63506	2.68960-16.36826	0.12759	0.53324	1	3.97196	29	1	3.57396	28	1	2.20714e-146	1
ebi-a-GCST90027490	72	0.272	7.25307	0.21782-241.5142	0	6.45791	3.78367-11.02225	0	5.97691	4.01915-8.88832	0.419	1.81057	0.43304-7.57014	0.403	1.81057	0.45354-7.22789	-0.01663	0.91359	1	36.1925	71	0.99981	36.1806	70	0.99973	0	1
ebi-a-GCST90027477	69	0	18.8671	4.56882-77.9122	0	4.90278	3.36553-7.14219	0	3.03447	2.35662-3.90730	0	6.30593	2.55588-15.55814	0	6.24219	2.36865-16.45026	-0.30145	0.01261	0.368	75.6016	68	0.24645	68.8488	67	0.41459	0	1
ebi-a-GCST90027550	120	0	0.01809	0.00566-0.0578	0	0.08663	0.05949-0.12616	0	0.25562	0.18623-0.35087	0	0.08343	0.03526-0.19742	0	0.08343	0.03232-0.21536	0.37892	1e-05	<0.001	198.585	119	1e-05	168.225	118	0.00166	0	0.997526
ebi-a-GCST90027536	72	0	0.01724	0.00332-0.0894	0	7.2369	4.43568-11.80714	0	4.19649	3.00536-5.85972	0.003	10.8579	2.34280-50.32157	0.002	10.8579	2.56258-46.00572	0.58764	0	0.388	78.008	71	0.26588	33.5461	70	0.99993	0	1
ebi-a-GCST90027836	28	0	171.907	20.19657-1463.2178	0	18.9876	9.26685-38.90537	0	9.11682	5.37673-15.45856	0	19.1363	4.86134-75.32857	0	19.1363	4.82908-75.83189	-0.45732	0.01012	0.766	23.713	27	0.64619	16.0199	26	0.93572	3.66585e-139	1
ebi-a-GCST90027599	116	0	3.73607	2.25629-6.1863	0.567	0.93619	0.74705-1.17322	0	0.53376	0.45923-0.62038	0.856	0.94741	0.52880-1.69738	0.844	0.94741	0.55442-1.61895	-0.42281	0	0.932	96.5147	115	0.89371	33.7409	114	1	0	0.820207
ebi-a-GCST90027810	65	0.008	0.28676	0.11816-0.6959	0	0.28826	0.20599-0.40338	0	0.35879	0.28047-0.45897	0.002	0.27647	0.12453-0.61382	0.001	0.27647	0.13140-0.58173	0.0392	0.60785	0.998	35.3861	64	0.9986	35.1201	63	0.99829	0	0.85305
ebi-a-GCST90027681	65	0.008	0.28554	0.11718-0.6958	0	0.28767	0.20563-0.40243	0	0.35891	0.28058-0.45912	0.002	0.27662	0.12550-0.60970	0.001	0.27662	0.13194-0.57995	0.03999	0.60236	0.998	35.4128	64	0.99859	35.1386	63	0.99828	0	0.854063
ebi-a-GCST90027748	321	0.138	0.50701	0.20699-1.2419	0	0.51407	0.41385-0.63856	0	0.51415	0.43738-0.60441	0.002	0.31802	0.15354-0.65867	0.004	0.36045	0.18250-0.71193	0.00164	0.9752	1	117.346	320	1	117.345	319	1	NA	0.999962
ebi-a-GCST90027651	321	0.138	0.50708	0.20704-1.2419	0	0.51409	0.41387-0.63858	0	0.51417	0.43739-0.60442	0.002	0.31808	0.15352-0.65902	0.004	0.36052	0.18223-0.71325	0.00163	0.97536	1	117.346	320	1	117.345	319	1	NA	0.999962
ebi-a-GCST90027551	34	0	7.57019	2.75322-20.8148	0	3.6652	2.61109-5.14485	0	2.66251	2.09717-3.38026	0.001	4.02349	1.94173-8.33715	0.001	4.02349	1.87318-8.64227	-0.24949	0.04525	0.918	23.7253	33	0.88223	19.3832	32	0.96116	8.87832e-164	0.999942
ebi-a-GCST90027726	67	0.008	0.28945	0.11875-0.7056	0	0.28925	0.20755-0.40310	0	0.36927	0.28965-0.47077	0.002	0.27613	0.12614-0.60447	0.001	0.27613	0.12960-0.58836	0.0425	0.57959	1	37.4806	66	0.99819	37.1706	65	0.99784	0	0.852183
ebi-a-GCST90027467	34	0.034	8.08086	1.27828-51.0844	0	0.134	0.07636-0.23514	0	0.21194	0.14492-0.30996	0.001	0.11461	0.03602-0.36465	0.001	0.11575	0.03659-0.36617	-0.489	0.0004	0.925	23.7355	33	0.88192	8.09384	32	0.99999	3.5452e-160	0.779323
ebi-a-GCST90027588	131	0.01	0.33581	0.14834-0.7602	0	0.37232	0.28295-0.48993	0	0.42507	0.34184-0.52856	0.014	0.38572	0.18261-0.81474	0.015	0.38144	0.17787-0.81799	0.03623	0.55847	1	33.3864	130	1	33.0422	129	1	0	0.984351
ebi-a-GCST90027824	83	0	0.00013	0.00001-0.0013	0	3.4511	1.93533-6.15402	0	6.6073	4.04791-10.78492	0	48.1217	8.07975-286.60445	0	48.1217	6.44068-359.54150	0.95066	0	<0.001	164.497	82	0	78.6569	81	0.55305	0	1
ebi-a-GCST90027847	55	0	403.161	25.17641-6455.9923	0	0.14012	0.08232-0.23849	0	0.21868	0.14735-0.32453	0	0.12611	0.04481-0.35487	0.001	0.12611	0.04089-0.38897	-0.6823	0	0.963	39.7082	54	0.92701	10.8847	53	1	6.55537e-266	0.92454
ebi-a-GCST90027670	103	0.586	0.71263	0.21138-2.4025	0	3.08539	2.23626-4.25695	0	2.49989	1.95798-3.19177	0.156	1.83761	0.79795-4.23185	0.172	1.83761	0.77167-4.37601	0.17352	0.04149	0.115	122.252	102	0.08385	117.3	101	0.12783	0	1
ebi-a-GCST90027620	48	0	654.233	66.51310-6435.1397	0	5.2137	3.32509-8.17501	0	3.20713	2.33781-4.39971	0.001	5.25035	2.14342-12.86083	0.001	5.25035	2.12705-12.95980	-0.76845	3e-05	0.862	38.329	47	0.81225	17.134	46	0.99997	3.90681e-218	1
ebi-a-GCST90027464	38	0.044	23.0273	1.21625-435.9770	0	0.10865	0.05778-0.20430	0	0.18653	0.11804-0.29475	0.001	0.10868	0.03266-0.36160	0.003	0.10868	0.02801-0.42167	-0.47207	0.00251	0.996	20.4108	37	0.98769	9.85387	36	1	1.11353e-165	0.813501
ebi-a-GCST90027807	24	0.911	1.16021	0.08891-15.1391	0	6.81648	3.91474-11.86909	0	4.64644	3.05033-7.07771	0	7.20558	2.87906-18.03377	0.001	7.15419	2.74290-18.65994	0.20352	0.29481	0.895	16.4871	23	0.83364	15.3353	22	0.84745	3.08753e-107	1
ebi-a-GCST90027557	131	0	480.927	155.57081-1486.7260	0	2.07846	1.69921-2.54235	0	1.71768	1.48084-1.99240	0	3.23541	1.89807-5.51502	0	3.23541	1.84643-5.66925	-1.01925	0	0.811	117.296	130	0.78036	19.8552	129	1	0	0.998384
ebi-a-GCST90027520	57	0	0.06909	0.01700-0.2808	0	0.39154	0.28728-0.53364	0	0.47528	0.37740-0.59854	0.007	0.39022	0.20300-0.75011	0.006	0.39022	0.20420-0.74569	0.41996	0.00843	1	29.3173	56	0.99876	21.8489	55	0.99998	2.21784e-291	0.656135
ebi-a-GCST90027647	99	0	0.04994	0.01478-0.1688	0	0.23377	0.15034-0.36350	0	0.34936	0.24850-0.49115	0.008	0.2252	0.07590-0.66818	0.011	0.2252	0.07317-0.69306	0.21679	0.00153	1	43.8477	98	1	33.2127	97	1	0	0.964302
ebi-a-GCST90027808	91	0.002	0.13387	0.03976-0.4507	0	0.45654	0.35116-0.59355	0	0.54865	0.45108-0.66733	0.019	0.45654	0.23937-0.87073	0.014	0.45654	0.24734-0.84268	0.20602	0.02333	1	40.0998	90	1	34.7742	89	1	0	0.694193
ebi-a-GCST90027835	32	0.001	21412.2	119.32166-3842402.0372	0	0.15444	0.07904-0.30176	0	0.23671	0.14624-0.38313	0.003	0.11791	0.03252-0.42753	0.002	0.11905	0.03583-0.39550	-1.12137	0.00015	0.944	20.9903	31	0.91217	2.25235	30	1	1.03754e-148	0.717214
ebi-a-GCST90027703	56	0	0.01092	0.00102-0.1172	0	3.51607	2.27843-5.42601	0	2.63172	1.89562-3.65368	0.011	3.71394	1.40065-9.84783	0.021	3.59097	1.25079-10.30954	0.69952	3e-05	0.112	70.8058	55	0.07421	49.9896	54	0.62978	3.22769e-260	1
ebi-a-GCST90027604	65	0.42	2.26206	0.31466-16.2616	0	6.20961	3.48369-11.06850	0	3.30697	2.19966-4.97168	0.006	8.88929	1.97249-40.06082	0.006	9.01411	1.97940-41.04983	0.03765	0.70104	0.993	42.5558	64	0.98217	42.4071	63	0.97846	0	1
ebi-a-GCST90027827	212	0	0.09691	0.06442-0.1458	0	0.50637	0.43049-0.59561	0	0.70919	0.63023-0.79803	0.007	0.48666	0.29100-0.81389	0.005	0.49052	0.30144-0.79820	0.49484	0	0.999	156.532	211	0.99806	56.95	210	1	0	0.67963
ebi-a-GCST90027817	76	0	0.01152	0.00132-0.1006	0.041	0.66763	0.45281-0.98437	0	0.43995	0.33147-0.58395	0.347	0.67419	0.29775-1.52658	0.327	0.67419	0.30810-1.47530	0.41646	0.00139	0.997	48.9142	75	0.99151	37.871	74	0.99985	0	0.868191
ebi-a-GCST90027596	43	0.041	0.12713	0.01877-0.8611	0	0.28697	0.18631-0.44201	0	0.39616	0.28784-0.54524	0.006	0.27406	0.11452-0.65584	0.005	0.27406	0.11695-0.64222	0.19699	0.24437	0.993	22.1358	42	0.99501	20.7408	41	0.99647	2.19023e-197	0.625591
ebi-a-GCST90027521	78	0.088	0.20188	0.03295-1.2369	0	0.21431	0.15069-0.30479	0	0.44743	0.33861-0.59123	0	0.20635	0.09086-0.46866	0	0.20635	0.09314-0.45717	0.11801	0.38655	0.008	111.914	77	0.00577	110.808	76	0.00566	0	0.79769
ebi-a-GCST90027602	53	0.149	5.81525	0.55073-61.4046	0.002	0.37693	0.20179-0.70411	0	0.26563	0.16778-0.42054	0.403	0.53187	0.12255-2.30840	0.379	0.54172	0.14005-2.09533	-0.28388	0.01166	0.997	29.4278	52	0.99511	22.5816	51	0.99981	2.81699e-254	0.874919
ebi-a-GCST90027735	30	0.164	0.10745	0.00506-2.2829	0	0.35238	0.22873-0.54288	0	0.38857	0.27910-0.54097	0.009	0.31495	0.14001-0.70845	0.008	0.31495	0.14133-0.70183	0.23788	0.41397	1	3.30745	29	1	2.61977	28	1	7.39303e-134	0.484032
ebi-a-GCST90027532	27	0.668	1.2868	0.41143-4.0246	0	2.54017	1.66714-3.87035	0	2.52063	1.82316-3.48492	0.019	2.55274	1.22896-5.30240	0.015	2.55274	1.25966-5.17321	0.18967	0.23935	1	1.69218	26	1	0.23929	25	1	9.06611e-124	0.995835
ebi-a-GCST90027629	66	0.003	0.08764	0.01857-0.4136	0.002	0.45696	0.27849-0.74980	0	0.35937	0.25023-0.51613	0.002	0.13614	0.04058-0.45670	0.002	0.13614	0.03975-0.46631	0.17156	0.07143	0.995	40.7004	65	0.99214	37.3399	64	0.99689	0	0.875081
ebi-a-GCST90027513	51	0.152	0.24753	0.03775-1.6232	0	5.05462	2.59812-9.83371	0	3.77037	2.35395-6.03909	0.028	5.65315	1.25850-25.39376	0.025	5.65315	1.30126-24.55927	0.28361	0.00511	0.725	43.8591	50	0.71694	35.2635	49	0.92984	3.31944e-232	1
ebi-a-GCST90027770	40	0.01	14.4061	2.08907-99.3437	0	3.13738	1.90106-5.17770	0	2.9217	1.99248-4.28428	0.028	3.28682	1.18497-9.11688	0.027	3.25047	1.19098-8.87131	-0.22469	0.10671	1	10.6596	39	1	7.92954	38	1	1.1265e-185	1
ebi-a-GCST90027720	44	0.004	0.06826	0.01225-0.3804	0	3.24636	2.06357-5.10709	0	2.51319	1.80461-3.50001	0.001	4.98785	2.08988-11.90437	0.001	4.92763	1.98362-12.24104	0.51096	0.00014	0.23	50.7252	43	0.19524	33.2466	42	0.83064	5.89193e-214	0.999969
ebi-a-GCST90027785	147	0	69.2585	13.62023-352.1782	0	1.67352	1.39064-2.01394	0	1.46889	1.27927-1.68662	0.01	1.90663	1.17160-3.10278	0.014	1.90663	1.14360-3.17874	-0.83828	1e-05	1	34.7234	146	1	12.9995	145	1	0	0.901509
ebi-a-GCST90027822	45	0.925	0.91992	0.16309-5.1889	0	2.07156	1.54952-2.76947	0	1.89448	1.50519-2.38445	0.022	2.09759	1.13841-3.86492	0.021	2.09759	1.14397-3.84614	0.1285	0.41348	1	8.93291	44	1	8.25097	43	1	3.9425e-228	0.948248
ebi-a-GCST90027615	73	0.002	0.07752	0.01584-0.3793	0	0.26592	0.15160-0.46647	0	0.33027	0.22107-0.49342	0.578	0.66665	0.16058-2.76753	0.638	0.71327	0.17532-2.90186	0.13331	0.06888	0.367	76.511	72	0.33591	73.0024	71	0.41203	0	0.911909
ebi-a-GCST90027469	77	0.035	0.12548	0.01881-0.8371	0	0.29645	0.16361-0.53712	0	0.34311	0.23092-0.50981	0.019	0.15964	0.03541-0.71967	0.012	0.15964	0.03938-0.64716	0.09024	0.29153	0.72	70.369	76	0.66059	69.2406	75	0.66569	0	0.908212
ebi-a-GCST90027679	52	0	0.02887	0.00742-0.1122	0	0.21502	0.12765-0.36219	0	0.36782	0.25219-0.53646	0.006	0.17232	0.05249-0.56568	0.004	0.17432	0.05555-0.54702	0.3589	0.00037	0.975	34.4642	51	0.96325	19.8416	50	0.99996	2.23425e-263	0.776027
ebi-a-GCST90027517	22	0.212	5.9719	0.39587-90.0893	0.025	0.32688	0.12272-0.87072	0	0.16635	0.08357-0.33113	0.366	0.40502	0.05961-2.75166	0.345	0.41185	0.06821-2.48677	-0.36629	0.01459	0.776	16.8268	21	0.72155	9.6785	20	0.97363	3.07384e-98	0.622759
ebi-a-GCST90027544	52	0	390.412	135.90447-1121.5320	0	3.91996	2.26113-6.79576	0	3.28053	2.07724-5.18085	0.015	14.1267	1.77984-112.12496	0.008	14.1267	2.15587-92.56778	-0.81062	0	<0.001	104.744	51	1e-05	18.0291	50	0.99999	1.69854e-232	1
ebi-a-GCST90027814	36	0.001	16.5875	3.51924-78.1833	0	6.1996	3.24436-11.84673	0	3.39915	2.11917-5.45223	0.952	0.95392	0.20758-4.38364	0.006	8.93928	2.08177-38.38602	-0.26284	0.04285	0.981	20.8376	35	0.9722	16.4109	34	0.99525	6.42846e-166	1
ebi-a-GCST90027791	42	0.515	0.55061	0.09283-3.2660	0.026	1.77977	1.07123-2.95695	0	2.42797	1.70664-3.45418	0.538	1.44667	0.45099-4.64056	0.482	1.48679	0.49665-4.45092	0.197	0.10341	0.556	40.4087	41	0.49674	37.6312	40	0.5774	2.08683e-194	0.999672
ebi-a-GCST90027579	102	0.001	0.02849	0.00352-0.2306	0	2.57894	1.70156-3.90874	0	2.25606	1.62897-3.12453	0.053	2.69333	1.00081-7.24815	0.059	2.69333	0.97511-7.43922	0.42165	7e-05	1	31.8533	101	1	14.6418	100	1	0	1
ebi-a-GCST90027846	33	0.413	3434.47	0.00002-776683705257.3310	0	3.07267	1.84364-5.12099	0	2.82086	1.85689-4.28525	0.033	3.083	1.14227-8.32101	0.032	3.083	1.15296-8.24387	-0.86073	0.47447	1	0.90012	32	1	0.37588	31	1	2.13948e-153	0.99998
ebi-a-GCST90027489	73	0.043	2.2723	1.04026-4.9635	0	1.64476	1.29926-2.08214	0	1.56131	1.30185-1.87247	0.09	1.65042	0.93176-2.92338	0.073	1.65042	0.96128-2.83359	-0.11832	0.33636	1	8.39344	72	1	7.45652	71	1	0	0.818082
ebi-a-GCST90027475	57	0.935	0.91645	0.11402-7.3664	0.014	1.82609	1.12814-2.95585	0	2.35102	1.63808-3.37426	0.435	1.51665	0.53689-4.28436	0.389	1.56001	0.57157-4.25779	0.09978	0.37226	1	22.5903	56	0.99998	21.781	55	0.99998	7.69867e-300	0.999984
ebi-a-GCST90027688	351	0	0.04407	0.01831-0.1060	0	0.65791	0.54390-0.79582	0	0.71513	0.61983-0.82508	0.957	1.01704	0.55005-1.88049	0.57	0.84992	0.48552-1.48780	0.36769	0	1	148.384	350	1	108.643	349	1	NA	0.969562
ebi-a-GCST90027634	56	0.001	0.03067	0.00461-0.2041	0	0.33511	0.22146-0.50707	0	0.49479	0.36516-0.67044	0.019	0.32721	0.13225-0.80955	0.026	0.32721	0.12599-0.84979	0.42138	0.00519	0.996	28.4554	55	0.99885	19.9684	54	0.99999	6.23808e-269	0.589717
ebi-a-GCST90027587	78	0.055	0.12775	0.01620-1.0076	0	0.25354	0.15328-0.41937	0	0.42044	0.28780-0.61420	0.002	0.16006	0.05311-0.48244	0.005	0.23329	0.08691-0.62621	0.12729	0.25376	0.285	84.4598	77	0.26236	83.0152	76	0.27223	0	0.85137
ebi-a-GCST90027666	59	0	0.00232	0.00013-0.0409	0.001	0.294	0.14213-0.60818	0	0.25655	0.14137-0.46557	0.001	0.02047	0.00253-0.16587	0.498	0.5765	0.11833-2.80870	0.48552	0.0018	0.001	96.4452	58	0.00114	81.1753	57	0.01941	3.21129e-264	0.899506
ebi-a-GCST90027465	38	0.474	2.81195	0.17054-46.3641	0	0.26975	0.14509-0.50154	0	0.36848	0.23717-0.57250	0.005	0.17579	0.05543-0.55744	0.012	0.17863	0.05013-0.63651	-0.28222	0.15876	0.777	30.8896	37	0.75015	28.8186	36	0.79678	1.11138e-189	0.647959
ebi-a-GCST90027623	57	0.252	4.79036	0.33821-67.8498	0	0.3312	0.19079-0.57496	0	0.39555	0.26194-0.59731	0.02	0.21548	0.06129-0.75766	0.021	0.23687	0.07191-0.78026	-0.23058	0.06725	1	16.768	56	1	13.2827	55	1	3.24433e-273	0.747416
ebi-a-GCST90027662	359	0	0.0489	0.02244-0.1066	0	0.66354	0.54785-0.80365	0	0.72949	0.63354-0.83997	0.977	1.00918	0.54579-1.86598	0.263	0.72688	0.41596-1.27019	0.35575	0	1	158.011	358	1	110.199	357	1	NA	0.95787
ebi-a-GCST90027736	359	0	0.04886	0.02242-0.1065	0	0.66363	0.54791-0.80379	0	0.7295	0.63353-0.84000	0.977	1.0091	0.54601-1.86495	0.264	0.72684	0.41579-1.27060	0.3558	0	1	158.018	358	1	110.223	357	1	NA	0.957818
ebi-a-GCST90027640	134	0.001	0.07007	0.01485-0.3307	0.374	1.18545	0.81446-1.72544	0	1.82691	1.38894-2.40299	0.612	0.7443	0.23836-2.32417	0.586	0.7443	0.25754-2.15104	0.33104	5e-05	1	63.3872	133	1	45.8721	132	1	0	0.999865
ebi-a-GCST90027649	43	0.586	2.64343	0.08221-84.9996	0	3.85641	1.92190-7.73811	0	2.96244	1.79136-4.89913	0.057	3.83375	0.99927-14.70837	0.071	3.83375	0.92380-15.90997	0.01096	0.94846	0.931	29.0084	42	0.93607	29.0041	41	0.92015	1.49376e-198	1
ebi-a-GCST90027458	32	0.192	0.18098	0.01472-2.2252	0	3.10173	1.68633-5.70513	0	2.69717	1.69380-4.29494	0.061	3.06656	0.99006-9.49817	0.058	3.06656	1.00332-9.37266	0.29397	0.03995	1	10.6349	31	0.99976	6.0231	30	1	1.14473e-144	0.999806
ebi-a-GCST90027673	38	0.759	2.13826	0.01736-263.4059	0	4.21607	2.10098-8.46045	0	3.15465	1.83902-5.41147	0.024	4.93612	1.30053-18.73480	0.047	4.93612	1.07271-22.71376	0.0312	0.87429	1	12.5739	37	0.99994	12.5485	36	0.9999	6.24359e-181	1
ebi-a-GCST90027519	50	0.012	16.1031	2.00926-129.0583	0	8.32969	4.03327-17.20283	0	3.28228	1.87584-5.74324	0.005	11.7623	2.25205-61.43401	0.01	11.5197	1.91308-69.36618	-0.16704	0.12691	0.035	69.5404	49	0.02836	66.2119	48	0.04171	6.5293e-223	1
ebi-a-GCST90027734	77	0.023	64.5891	1.92895-2162.7086	0	0.31332	0.20008-0.49065	0	0.49219	0.35196-0.68830	0.05	0.30558	0.09493-0.98366	0.049	0.30558	0.09567-0.97609	-0.46214	0.00778	1	30.1172	76	1	22.6371	75	1	0	0.733754
ebi-a-GCST90027686	77	0.022	64.7941	1.96392-2137.6952	0	0.31294	0.19978-0.49018	0	0.49216	0.35186-0.68841	0.052	0.3057	0.09429-0.99111	0.05	0.3057	0.09519-0.98175	-0.46216	0.0075	1	30.1371	76	1	22.5829	75	1	0	0.733204
ebi-a-GCST90027747	77	0.022	64.8612	1.96670-2139.1034	0	0.31292	0.19977-0.49016	0	0.49216	0.35185-0.68841	0.052	0.30572	0.09445-0.98960	0.05	0.30572	0.09520-0.98171	-0.46224	0.00748	1	30.1381	76	1	22.579	75	1	0	0.733173
ebi-a-GCST90027660	77	0.022	64.8881	1.96780-2139.6837	0	0.31292	0.19977-0.49015	0	0.49216	0.35186-0.68842	0.052	0.3057	0.09442-0.98977	0.05	0.3057	0.09520-0.98171	-0.46228	0.00747	1	30.1384	76	1	22.5774	75	1	0	0.733169
ebi-a-GCST90027752	77	0.022	64.8292	1.96715-2136.5036	0	0.31292	0.19977-0.49015	0	0.49217	0.35187-0.68843	0.052	0.30573	0.09431-0.99106	0.05	0.30573	0.09516-0.98226	-0.4622	0.00747	1	30.1386	76	1	22.578	75	1	0	0.733169
ebi-a-GCST90027717	33	0.447	1.85525	0.38556-8.9272	0	0.50091	0.35350-0.70977	0	0.57892	0.44512-0.75294	0.026	0.40541	0.19030-0.86369	0.024	0.41506	0.20013-0.86084	-0.21853	0.15065	0.959	19.8678	32	0.95352	17.696	31	0.97324	8.07312e-152	0.289004
ebi-a-GCST90027707	37	0.734	2.34139	0.01791-306.1639	0	4.16293	2.09431-8.27481	0	3.10891	1.80089-5.36697	0.043	4.81478	1.10791-20.92417	0.039	4.88427	1.14576-20.82119	0.02282	0.9093	1	12.4734	36	0.99991	12.4602	35	0.99984	1.69735e-176	1
ebi-a-GCST90027691	13	0.164	0.28027	0.05269-1.4909	0.004	0.38974	0.20584-0.73795	0	0.36924	0.22816-0.59755	0.134	0.41327	0.14061-1.21470	0.113	0.41971	0.15492-1.13707	0.05232	0.74202	0.968	5.14051	12	0.95312	5.02654	11	0.92987	3.0524e-56	0.255323
ebi-a-GCST90027562	47	0.119	0.16283	0.01734-1.5289	0	0.34841	0.21597-0.56206	0	0.46904	0.32504-0.67683	0.04	0.34467	0.12830-0.92589	0.05	0.34467	0.12193-0.97425	0.14977	0.35295	1	14.1715	46	1	13.2905	45	1	1.01546e-213	0.541346
ebi-a-GCST90027583	72	0	0.02848	0.00852-0.0953	0.001	0.43264	0.25892-0.72291	0	0.45887	0.31448-0.66955	0.005	0.15312	0.04291-0.54639	0.003	0.15529	0.04681-0.51513	0.31956	1e-05	1	39.277	71	0.99919	16.7078	70	1	0	0.755358
ebi-a-GCST90027790	72	0.826	0.72133	0.03992-13.0328	0.001	0.42928	0.26426-0.69733	0	0.47334	0.32879-0.68146	0.012	0.2262	0.07279-0.70291	0.016	0.22978	0.07143-0.73918	-0.04689	0.77451	1	26.5899	71	1	26.5072	70	1	0	0.743754
ebi-a-GCST90027453	88	0.556	0.37597	0.01467-9.6354	0	2.34742	1.45852-3.77804	0	2.11629	1.46797-3.05095	0.135	2.48543	0.76159-8.11117	0.1	2.54763	0.84694-7.66341	0.14291	0.2963	1	45.9729	87	0.99991	44.8688	86	0.99993	0	0.999979
ebi-a-GCST90027798	33	0.482	1.76927	0.36802-8.5059	0	0.49898	0.34868-0.71406	0	0.58403	0.44884-0.75995	0.026	0.42573	0.20788-0.87188	0.026	0.43243	0.21364-0.87530	-0.20874	0.17044	0.961	19.5106	32	0.95924	17.541	31	0.97497	1.64881e-151	0.282635
ebi-a-GCST90027503	46	0.879	1.18461	0.13604-10.3149	0.001	0.33592	0.17432-0.64732	0	0.36634	0.22395-0.59928	0.056	0.24107	0.05809-1.00049	0.062	0.24475	0.05800-1.03286	-0.11831	0.28101	0.999	20.1636	45	0.99949	18.9722	44	0.99965	2.01229e-212	0.691708
ebi-a-GCST90027449	62	0.026	0.19084	0.04586-0.7942	0	0.52711	0.37296-0.74499	0	0.57685	0.44041-0.75556	0.056	0.45195	0.20356-1.00344	0.054	0.45195	0.20459-0.99835	0.1973	0.12675	1	13.4463	61	1	11.0484	60	1	0	0.498348
ebi-a-GCST90027600	63	0.102	0.43324	0.16126-1.1639	0	0.47954	0.33254-0.69152	0	0.59021	0.45568-0.76447	0.043	0.41171	0.17757-0.95458	0.042	0.42669	0.19112-0.95262	0.0492	0.52757	0.534	61.2953	62	0.50142	60.8917	61	0.47982	0	0.475554
ebi-a-GCST90027462	49	0.937	0.91629	0.10653-7.8812	0	2.49286	1.82205-3.41063	0	1.5818	1.25890-1.98753	0.016	2.67795	1.23330-5.81484	0.016	2.6609	1.23881-5.71548	0.09111	0.61933	0.969	32.365	48	0.95922	32.1149	47	0.95206	3.435e-229	0.64975
ebi-a-GCST90027819	74	0.03	53.5569	1.58982-1804.1996	0	0.31265	0.19647-0.49753	0	0.5042	0.35815-0.70979	0.042	0.30292	0.09795-0.93682	0.039	0.30292	0.09948-0.92237	-0.44294	0.01094	1	28.6414	73	1	21.817	72	1	0	0.695904
ebi-a-GCST90027470	40	0.012	82192.2	19.38218-348544685.7102	0.048	0.42667	0.18346-0.99227	0	0.23678	0.11474-0.48863	0.506	0.49548	0.06371-3.85376	0.466	0.49548	0.07631-3.21725	-0.97343	0.00471	0.002	68.3928	39	0.00249	55.2747	38	0.03467	9.56175e-174	0.78436
ebi-a-GCST90027704	40	0.63	0.69582	0.16134-3.0010	0	2.82184	1.72727-4.61005	0	2.04908	1.42178-2.95317	0.03	3.10619	1.15722-8.33754	0.048	3.10619	1.04422-9.23981	0.13785	0.14294	1	16.4588	39	0.99943	14.2211	38	0.99984	1.10786e-186	0.969546
ebi-a-GCST90027737	58	0.019	0.03241	0.00199-0.5267	0.015	0.48085	0.26645-0.86775	0	0.43229	0.28072-0.66570	0.057	0.25836	0.06578-1.01465	0.081	0.28203	0.06983-1.13913	0.23796	0.07057	0.997	31.5219	57	0.99755	28.1239	56	0.99932	1.22298e-291	0.720545
ebi-a-GCST90027663	58	0.019	0.03244	0.00200-0.5270	0.015	0.48086	0.26646-0.86777	0	0.43228	0.28071-0.66570	0.057	0.25831	0.06580-1.01395	0.081	0.28198	0.06984-1.13857	0.23789	0.07063	0.997	31.5221	57	0.99755	28.1255	56	0.99932	1.25389e-291	0.720537
ebi-a-GCST90027780	39	0.035	0.0315	0.00143-0.6923	0	3.78509	1.84346-7.77178	0	2.79564	1.63988-4.76596	0.035	6.69203	1.22213-36.64368	0.047	6.19527	1.08727-35.30050	0.4729	0.00643	0.887	28.5196	38	0.86771	20.1746	37	0.98895	7.37704e-179	0.999997
ebi-a-GCST90027776	32	0.862	0.74438	0.02735-20.2601	0	0.29662	0.15938-0.55203	0	0.39645	0.24516-0.64111	0.019	0.21814	0.06500-0.73206	0.026	0.20987	0.05665-0.77748	-0.07709	0.70827	0.991	15.9152	31	0.98852	15.7725	30	0.98459	7.84859e-155	0.525493
ebi-a-GCST90027446	12	0.873	0.68597	0.00765-61.4933	0	0.09202	0.02666-0.31766	0	0.15459	0.05845-0.40884	0.028	0.08047	0.01141-0.56760	0.03	0.08047	0.01103-0.58711	-0.13009	0.52087	0.882	6.05005	11	0.87	5.60734	10	0.8471	3.69057e-50	0.377133
ebi-a-GCST90027848	78	0.518	0.80085	0.40999-1.5643	0.017	0.73499	0.57047-0.94696	0	0.68702	0.56432-0.83640	0.679	0.87844	0.47703-1.61762	0.704	0.88859	0.48429-1.63042	-0.02928	0.64005	1	15.3745	77	1	15.154	76	1	0	0.389723
ebi-a-GCST90027571	57	0.025	23.9375	1.62238-353.1894	0	0.19049	0.10375-0.34973	0	0.4424	0.28802-0.67953	0.025	0.18347	0.04315-0.78013	0.022	0.18347	0.04453-0.75590	-0.33406	0.00474	1	31.3009	56	0.99693	22.6343	55	0.99997	8.50396e-292	0.705139
ebi-a-GCST90027757	155	0.002	0.05882	0.00982-0.3523	0	0.51779	0.37184-0.72103	0	0.63234	0.49678-0.80488	0.016	0.32249	0.13030-0.79814	0.012	0.31885	0.13193-0.77060	0.26488	0.00956	1	64.9377	154	1	58.0501	153	1	0	0.783237
ebi-a-GCST90027841	103	0.987	1.00776	0.38422-2.6432	0.002	1.61483	1.19984-2.17336	0	1.55375	1.23074-1.96153	0.187	1.62467	0.79352-3.32641	0.179	1.62467	0.80455-3.28080	0.07954	0.36662	1	5.37741	102	1	4.55495	101	1	0	0.88934
ebi-a-GCST90027753	32	0.098	5.65822	0.77247-41.4455	0.002	1.72601	1.21372-2.45453	0	1.68263	1.27503-2.22052	0.122	1.72367	0.88160-3.37005	0.109	1.72367	0.90207-3.29357	-0.27509	0.23745	1	4.7892	31	1	3.33606	30	1	2.00438e-145	0.598834
ebi-a-GCST90027750	50	0.074	13.8465	0.82433-232.5841	0	3.67062	1.92479-6.99996	0	2.39384	1.49246-3.83963	0.044	4.00305	1.07591-14.89376	0.049	4.00305	1.04013-15.40624	-0.1613	0.22217	0.976	31.9569	49	0.97164	30.4272	48	0.97753	4.79013e-234	0.999895
ebi-a-GCST90027484	31	0.005	32.6873	3.46777-308.1108	0.001	3.54693	1.67296-7.52000	0	2.80723	1.59979-4.92598	0.044	5.55443	1.12091-27.52373	0.026	5.26666	1.30730-21.21759	-0.2797	0.03475	0.859	22.3681	30	0.84032	17.4604	29	0.95454	2.64723e-146	0.999962
ebi-a-GCST90027650	47	0.006	0.03526	0.00363-0.3428	0.322	1.42451	0.70756-2.86793	0	2.5487	1.52563-4.25781	0.58	1.52449	0.34651-6.70698	0.59	1.55706	0.31474-7.70297	0.43476	0.00047	0.26	52.0654	46	0.24972	37.8159	45	0.76745	2.63181e-219	0.999986
ebi-a-GCST90027452	43	0	27.7653	6.11067-126.1587	0.011	1.77857	1.14139-2.77146	0	1.73884	1.28264-2.35731	0.018	4.54469	1.36434-15.13865	0.017	4.49012	1.37075-14.70819	-0.52784	0.00071	0.526	41.1178	42	0.50957	27.707	41	0.94405	2.64695e-191	0.785073
ebi-a-GCST90027800	19	0.035	34.4312	1.68066-705.3823	0	5.65106	2.79925-11.40824	0	2.64665	1.54705-4.52782	0.021	6.36563	1.50900-26.85313	0.018	6.36563	1.57937-25.65652	-0.52386	0.10935	0.283	21.4427	18	0.25767	18.3595	17	0.36651	1.84731e-82	0.984551
ebi-a-GCST90027454	65	0.294	0.30096	0.03261-2.7774	0.001	0.39588	0.22966-0.68240	0	0.47447	0.31298-0.71929	0.121	0.38507	0.11717-1.26542	0.126	0.38507	0.11523-1.28674	0.05456	0.68413	1	8.27463	64	1	8.10758	63	1	0	0.679121
ebi-a-GCST90027526	19	0.026	0.01415	0.00046-0.4324	0.126	2.7068	0.75629-9.68783	0.001	7.08474	2.33991-21.45106	0.015	65.7936	3.07967-1405.60742	0.778	1.45662	0.11107-19.10216	0.62148	0.00186	0.016	37.1351	18	0.00503	20.6766	17	0.24109	2.55478e-80	1
ebi-a-GCST90027823	27	0.162	3.70386	0.62295-22.0219	0.014	1.60135	1.09951-2.33225	0.001	1.67771	1.25097-2.25003	0.174	1.58982	0.83050-3.04337	0.173	1.58982	0.83175-3.03879	-0.27205	0.38577	1	1.98498	26	1	1.20569	25	1	2.12891e-127	0.538497
ebi-a-GCST90027574	22	0.463	9.32275	0.02688-3233.4427	0.001	4.87472	1.88881-12.58087	0.001	3.50259	1.69616-7.23289	0.041	6.38184	1.19917-33.96350	0.047	6.30382	1.14250-34.78193	-0.09127	0.74438	0.998	7.52836	21	0.99684	7.41906	20	0.99507	7.35335e-98	0.999999
ebi-a-GCST90027738	68	0.881	1.21982	0.09078-16.3912	0	0.28385	0.16319-0.49373	0.001	0.49936	0.33392-0.74675	0.021	0.23319	0.06972-0.78002	0.045	0.24155	0.06187-0.94312	-0.08754	0.49761	0.947	48.7762	67	0.95411	48.311	66	0.94994	0	0.655334
ebi-a-GCST90027652	68	0.879	1.22489	0.09123-16.4464	0	0.28381	0.16314-0.49373	0.001	0.49934	0.33388-0.74679	0.021	0.23322	0.06956-0.78195	0.045	0.24158	0.06172-0.94561	-0.08793	0.49547	0.947	48.7798	67	0.95407	48.31	66	0.94995	0	0.655178
ebi-a-GCST90027624	25	0.006	9.41297	2.16907-40.8488	0	3.31036	1.89301-5.78891	0.001	2.16538	1.37894-3.40035	0.049	3.43687	1.07112-11.02784	0.044	3.3863	1.10281-10.39805	-0.29583	0.05197	0.082	35.3095	24	0.06394	29.8563	23	0.15357	2.17775e-107	0.913539
ebi-a-GCST90027749	65	0.87	1.24466	0.09185-16.8673	0	0.25917	0.14943-0.44950	0.001	0.49744	0.32965-0.75062	0.037	0.22998	0.05960-0.88738	0.03	0.23394	0.06464-0.84668	-0.09014	0.48748	0.931	48.7736	64	0.92075	48.2858	63	0.91448	0	0.639816
ebi-a-GCST90027845	39	0.095	0.43875	0.17105-1.1254	0.01	0.71699	0.55747-0.92216	0.001	0.71518	0.58686-0.87156	0.247	0.73952	0.44707-1.22325	0.214	0.73952	0.46319-1.18070	0.15211	0.30516	1	1.78387	38	1	0.70258	37	1	3.05417e-184	0.176713
ebi-a-GCST90027759	25	0.768	1.84697	0.03269-104.3657	0.017	0.35409	0.15114-0.82956	0.001	0.33409	0.17165-0.65023	0.01	0.10439	0.02133-0.51100	0.342	0.45046	0.08969-2.26248	-0.18166	0.40823	0.302	28.0366	24	0.2585	27.1974	23	0.24766	3.65488e-116	0.500645
ebi-a-GCST90027638	41	0.773	0.64919	0.03516-11.9876	0	0.06969	0.03142-0.15460	0.001	0.34239	0.17840-0.65710	0.003	0.06824	0.01325-0.35151	0.01	0.06824	0.00974-0.47793	-0.08367	0.66133	0.015	63.696	40	0.00999	63.3793	39	0.00809	1.45246e-186	0.682962
ebi-a-GCST90027829	19	0.009	4.86714	1.70769-13.8720	0.001	1.95738	1.31145-2.92145	0.001	1.6798	1.22443-2.30453	0.069	2.05433	0.98989-4.26340	0.057	2.04797	1.02651-4.08587	-0.29906	0.05213	0.999	5.02608	18	0.99882	0.6653	17	1	1.07542e-86	0.404766
ebi-a-GCST90027635	44	0.438	2.69133	0.22623-32.0169	0	2.70349	1.65866-4.40649	0.001	1.80506	1.25601-2.59414	0.047	2.74902	1.04463-7.23426	0.046	2.77077	1.05062-7.30725	-0.05407	0.75085	0.992	24.0291	43	0.99146	23.927	42	0.98875	3.09569e-220	0.887742
ebi-a-GCST90027690	41	0.947	0.88394	0.02401-32.5409	0.104	0.58114	0.30218-1.11761	0.001	0.45546	0.28045-0.73968	0.116	0.35922	0.10301-1.25273	0.18	0.38851	0.10004-1.50883	-0.06076	0.71803	0.996	19.2658	40	0.99771	19.1335	39	0.99686	5.08757e-211	0.557098
ebi-a-GCST90027597	47	0.073	6.19143	0.88556-43.2875	0.091	1.34418	0.95421-1.89353	0.002	1.50054	1.16757-1.92847	0.757	1.13081	0.52107-2.45409	0.762	1.12102	0.53698-2.34030	-0.25564	0.15672	0.139	56.6421	46	0.13518	54.1462	45	0.16483	5.70135e-215	0.504076
ebi-a-GCST90027739	81	0.197	0.29282	0.04607-1.8613	0	0.37062	0.25203-0.54500	0.002	0.64937	0.49685-0.84872	0.013	0.27966	0.10487-0.74580	0.019	0.28643	0.10267-0.79913	0.11948	0.39623	0.918	64.2261	80	0.90083	63.4984	79	0.89807	0	0.444936
ebi-a-GCST90027754	339	0	0.02247	0.00945-0.0534	0	0.69001	0.56324-0.84532	0.002	0.78802	0.67974-0.91356	0.884	0.95014	0.47903-1.88457	0.359	0.73868	0.38723-1.40910	0.44435	0	1	162.41	338	1	95.6309	337	1	NA	0.725199
ebi-a-GCST90027481	81	0	146.26	21.51782-994.1490	0.049	0.60458	0.36661-0.99702	0.002	0.5684	0.39957-0.80857	0.561	0.70235	0.21461-2.29858	0.526	0.69065	0.22129-2.15552	-0.52677	0	0.906	65.3504	80	0.88178	32.0025	79	1	0	0.64341
ebi-a-GCST90027480	53	0.031	11.0392	1.31693-92.5363	0.708	0.86026	0.39081-1.89364	0.002	0.36705	0.19384-0.69506	0.881	0.88497	0.18099-4.32716	0.844	0.86841	0.21525-3.50348	-0.3454	0.00196	<0.001	97.0476	52	0.00015	80.2752	51	0.00552	3.28739e-248	0.763463
ebi-a-GCST90027527	70	0.28	3.26774	0.38725-27.5741	0	0.37233	0.21740-0.63765	0.002	0.53274	0.35633-0.79649	0.08	0.24353	0.05137-1.15454	0.069	0.25395	0.05929-1.08764	-0.18838	0.09421	0.674	63.2418	69	0.67268	60.3609	68	0.73354	0	0.613798
ebi-a-GCST90027565	54	0.854	0.69846	0.01557-31.3308	0.255	1.46184	0.76067-2.80935	0.002	0.4442	0.26419-0.74688	0.573	1.89585	0.20786-17.29168	0.508	1.89585	0.28889-12.44151	-0.04332	0.81476	0.006	84.8668	53	0.00355	84.7764	52	0.00276	6.92981e-256	0.661618
ebi-a-GCST90027502	38	0.107	0.13357	0.01225-1.4568	0.001	3.52636	1.69118-7.35300	0.002	2.45788	1.37767-4.38507	0.073	3.71268	0.91944-14.99175	0.063	3.78319	0.97096-14.74069	0.2654	0.01913	0.261	42.3946	37	0.24962	36.322	36	0.45365	1.03042e-172	0.999355
ebi-a-GCST90027669	62	0.388	1.66234	0.52930-5.2207	0.016	1.40852	1.06663-1.85999	0.002	1.36557	1.11728-1.66905	0.452	1.31118	0.64995-2.64512	0.425	1.31118	0.67691-2.53980	-0.03586	0.73348	0.973	41.2666	61	0.97525	41.1496	60	0.97001	4.59712e-288	0.371195
ebi-a-GCST90027805	18	0.446	0.42117	0.04812-3.6860	0.006	0.43716	0.24325-0.78562	0.003	0.49556	0.31406-0.78196	0.13	0.41689	0.14170-1.22650	0.117	0.41689	0.14756-1.17783	0.02904	0.88238	0.962	8.61475	17	0.95158	8.59215	16	0.92926	4.28668e-80	0.233471
ebi-a-GCST90027560	27	0.274	0.4904	0.14082-1.7078	0.064	0.68413	0.45791-1.02212	0.003	0.62811	0.46431-0.84970	0.865	0.92938	0.40216-2.14775	0.875	0.93526	0.40916-2.13784	0.05113	0.69203	0.991	12.3262	26	0.98918	12.1656	25	0.98518	2.13047e-121	0.198296
ebi-a-GCST90027547	33	0.651	0.40178	0.00803-20.1081	0.769	1.13675	0.48383-2.67079	0.003	3.15181	1.49008-6.66672	0.026	30.4986	1.74154-534.10618	0.586	0.50361	0.04376-5.79609	0.22475	0.30132	0.001	82.8249	32	0	79.9744	31	0	4.92073e-142	1
ebi-a-GCST90027573	26	0.212	0.09388	0.00252-3.4918	0.015	0.34012	0.14206-0.81435	0.003	0.34791	0.17458-0.69333	0.188	0.31836	0.06079-1.66733	0.181	0.32406	0.06498-1.61599	0.13308	0.4765	1	4.2149	25	1	3.69178	24	1	1.57813e-119	0.483977
ebi-a-GCST90027857	27	0.03	0.11467	0.01821-0.7222	0.107	0.60868	0.33291-1.11290	0.003	0.52758	0.34541-0.80581	0.961	0.9659	0.24548-3.80060	0.826	0.86285	0.23540-3.16268	0.24574	0.10792	0.324	29.1725	26	0.3033	26.253	25	0.3942	3.0448e-119	0.290817
ebi-a-GCST90027767	24	0.529	2.97294	0.10527-83.9562	0.245	0.77355	0.50189-1.19225	0.003	0.61831	0.44836-0.85269	0.494	0.7745	0.37694-1.59137	0.484	0.7745	0.38287-1.56671	-0.2878	0.3647	0.728	18.6152	23	0.72332	17.7585	22	0.72021	2.26332e-104	0.185997
ebi-a-GCST90027769	61	0.035	4.09285	1.14103-14.6810	0.107	0.67713	0.42141-1.08802	0.003	0.59094	0.41529-0.84088	0.619	0.75629	0.25286-2.26201	0.609	0.75629	0.26091-2.19228	-0.23602	0.00305	0.999	32.1424	60	0.99879	22.5957	59	1	0	0.47154
ebi-a-GCST90027555	16	0.252	10.4776	0.22223-493.9962	0.003	5.19388	1.76536-15.28093	0.004	3.36069	1.48166-7.62269	0.034	8.43675	1.40016-50.83601	0.036	8.57549	1.37500-53.48283	-0.10858	0.56335	0.809	11.0637	15	0.74806	10.7134	14	0.70839	2.13571e-70	0.999727
ebi-a-GCST90027828	56	0.004	6.33266	1.89026-21.2154	0	2.28119	1.54580-3.36645	0.004	1.52279	1.14452-2.02608	0.032	2.61432	1.10832-6.16671	0.039	2.61432	1.07491-6.35836	-0.2598	0.02099	0.993	30.9037	55	0.99645	25.2501	54	0.99971	2.05927e-262	0.607402
ebi-a-GCST90027671	53	0.061	0.31231	0.09477-1.0292	0.001	2.18162	1.40116-3.39682	0.004	1.60477	1.16075-2.21866	0.052	3.0457	1.01691-9.12203	0.054	3.0457	1.00746-9.20760	0.22361	0.00729	0.999	24.6038	52	0.99956	16.7907	51	1	1.47077e-250	0.714179
ebi-a-GCST90027492	29	0.577	4.62859	0.02270-943.8396	0.017	0.34755	0.14573-0.82886	0.005	0.35879	0.17489-0.73607	0.361	2.81832	0.31667-25.08286	0.298	0.42352	0.08656-2.07216	-0.2582	0.34989	0.034	45.1945	28	0.02108	43.7287	27	0.02205	3.51626e-131	0.520422
ebi-a-GCST90027495	62	0.006	0.02617	0.00209-0.3276	0.187	0.67967	0.38301-1.20611	0.006	0.57448	0.38744-0.85182	0.492	0.64009	0.18087-2.26529	0.517	0.67382	0.20551-2.20932	0.28501	0.01832	0.729	53.7779	61	0.73256	47.8959	60	0.87022	0	0.505085
ebi-a-GCST90027646	91	0.002	37.4467	3.95934-354.1642	0.035	0.58566	0.35622-0.96288	0.007	0.59856	0.41320-0.86709	0.552	0.65542	0.16361-2.62562	0.555	0.67213	0.18062-2.50110	-0.37118	0.00044	0.095	106.763	90	0.10966	92.849	89	0.36909	0	0.613935
ebi-a-GCST90027535	45	0.02	0.03321	0.00209-0.5282	0.148	1.71022	0.82635-3.53950	0.007	2.23678	1.24614-4.01494	0.119	3.99909	0.72591-22.03131	0.962	1.03986	0.20707-5.22191	0.41107	0.00401	0.089	58.6106	44	0.06921	48.2405	43	0.26931	1.0145e-199	0.997014
ebi-a-GCST90027839	42	0.805	0.7664	0.09375-6.2652	0.235	1.44003	0.78923-2.62749	0.007	1.83336	1.17618-2.85774	0.576	1.4037	0.43217-4.55921	0.587	1.41695	0.40720-4.93069	0.09998	0.41011	1	12.5795	41	0.99999	11.8865	40	1	1.51559e-204	0.885183
ebi-a-GCST90027724	34	0	0.03143	0.00819-0.1207	0.936	1.02087	0.61895-1.68378	0.007	0.61872	0.43519-0.87963	0.701	1.2456	0.40950-3.78883	0.708	1.21715	0.43859-3.37776	0.52753	9e-05	0.294	37.4435	33	0.27243	17.3932	32	0.98329	5.83188e-157	0.253175
ebi-a-GCST90027834	44	0.165	1.95116	0.77168-4.9335	0.357	1.13805	0.86452-1.49811	0.008	1.33428	1.07939-1.64936	0.711	1.10624	0.65101-1.87978	0.741	1.1015	0.62372-1.94526	-0.08519	0.41413	1	13.9086	43	0.99999	13.2282	42	0.99999	2.70657e-208	0.248657
ebi-a-GCST90027816	29	0.005	0.05833	0.00948-0.3588	0.011	0.4235	0.21884-0.81957	0.008	0.50442	0.30477-0.83486	0.057	0.18984	0.03679-0.97955	0.06	0.20001	0.03994-1.00168	0.27581	0.02315	0.162	35.4116	28	0.1582	29.1522	27	0.35356	1.1633e-134	0.347051
ebi-a-GCST90027549	64	0.315	0.62995	0.25764-1.5402	0.056	0.66605	0.43929-1.00986	0.008	0.64662	0.46803-0.89337	0.395	0.6692	0.26684-1.67824	0.396	0.6692	0.26637-1.68120	0.00351	0.95121	1	14.3067	63	1	14.303	62	1	0	0.370579
ebi-a-GCST90027601	13	0.309	0.21547	0.01280-3.6279	0.125	0.46772	0.17737-1.23338	0.009	0.37233	0.17778-0.77982	0.413	0.5184	0.11364-2.36494	0.423	0.51402	0.10668-2.47670	0.08421	0.70154	0.981	4.15022	12	0.98057	3.99546	11	0.97005	2.8365e-60	0.263256
ebi-a-GCST90027612	65	0.977	1.02027	0.26727-3.8947	0.406	0.83328	0.54183-1.28148	0.009	0.65313	0.47379-0.90035	0.825	0.89627	0.34031-2.36046	0.809	0.89627	0.37101-2.16517	-0.06001	0.50389	1	27.3748	64	0.99998	26.9229	63	0.99998	0	0.407021
ebi-a-GCST90027799	33	0.17	22.1877	0.29356-1676.9639	0.006	2.31588	1.27870-4.19434	0.011	1.84599	1.15261-2.95651	0.101	2.79749	0.84906-9.21712	0.081	2.79749	0.91521-8.55094	-0.34334	0.26568	1	10.1486	32	0.99992	8.86373	31	0.99997	2.29876e-158	0.812687
ebi-a-GCST90027567	19	0.573	2.48806	0.11078-55.8796	0.442	0.66978	0.24131-1.85906	0.014	0.39073	0.18479-0.82614	0.705	0.72223	0.13777-3.78621	0.681	0.73203	0.16944-3.16258	-0.21392	0.24608	0.806	13.5559	18	0.75755	12.1126	17	0.79327	2.52264e-91	0.353908
ebi-a-GCST90027768	60	0.337	1.58387	0.62389-4.0210	0.029	1.31354	1.02907-1.67665	0.014	1.27226	1.04925-1.54267	0.353	1.31064	0.74351-2.31037	0.355	1.31064	0.74205-2.31493	-0.04141	0.63935	1	10.5475	59	1	10.3256	58	1	5.27241e-298	0.230794
ebi-a-GCST90027589	40	0.196	5.38697	0.43869-66.1505	0.02	1.8419	1.10170-3.07943	0.015	1.57839	1.09448-2.27625	0.026	3.37594	1.20632-9.44771	0.032	3.24258	1.14933-9.14818	-0.15494	0.3383	0.788	32.3114	39	0.76695	31.371	38	0.76792	5.41164e-195	0.579822
ebi-a-GCST90027636	22	0.716	1.67508	0.10827-25.9156	0.033	0.52342	0.28819-0.95064	0.015	0.55318	0.34381-0.89006	0.162	0.43886	0.14393-1.33820	0.175	0.44519	0.14398-1.37655	-0.1858	0.43026	1	4.56296	21	0.99994	3.91485	20	0.99996	1.25184e-103	0.232233
ebi-a-GCST90027777	28	0.636	2.92932	0.03598-238.4630	0.001	3.86636	1.75579-8.51397	0.016	2.13201	1.15006-3.95237	0.074	3.90257	0.92970-16.38159	0.071	3.90257	0.94291-16.15220	-0.02966	0.88743	1	9.29651	27	0.99939	9.27607	26	0.99895	1.83854e-128	0.932051
ebi-a-GCST90027712	14	0.081	36.1845	0.89571-1461.7762	0.004	4.71461	1.62634-13.66718	0.017	2.73894	1.19869-6.25835	0.066	4.84688	1.03445-22.70989	0.071	4.84688	1.00557-23.36207	-0.28072	0.1859	0.851	8.5839	13	0.80359	6.61498	12	0.88197	2.53049e-70	0.977786
ebi-a-GCST90027852	47	0.65	0.52317	0.03248-8.4258	0.324	0.7286	0.38810-1.36783	0.018	0.57011	0.35852-0.90659	0.668	0.76215	0.22166-2.62055	0.65	0.74707	0.21368-2.61190	0.00868	0.95126	0.904	34.8421	46	0.88538	34.8384	45	0.86272	4.39786e-237	0.41921
ebi-a-GCST90027548	33	0.946	1.1339	0.03105-41.4053	0	5.29198	2.33155-12.01136	0.018	2.08632	1.13675-3.82912	0.034	7.15874	1.24927-41.02214	0.051	6.94011	1.06408-45.26455	0.05828	0.73827	0.301	35.4624	32	0.30824	35.3329	31	0.2708	1.68203e-152	0.952702
ebi-a-GCST90027619	18	0.054	0.03178	0.00123-0.8199	0.006	3.06307	1.38584-6.77020	0.018	2.23341	1.14976-4.33838	0.096	3.5521	0.86636-14.56370	0.108	3.36163	0.82956-13.62231	0.58588	0.01914	0.099	25.7733	17	0.07869	18.0968	16	0.31826	1.34271e-83	0.873137
ebi-a-GCST90027675	80	0.122	0.10557	0.00629-1.7725	0.263	0.76926	0.48598-1.21767	0.018	0.65108	0.45587-0.92989	0.656	0.76924	0.24317-2.43347	0.643	0.76924	0.25488-2.32166	0.17767	0.20634	1	19.3311	79	1	17.7072	78	1	0	0.4455
ebi-a-GCST90027760	6	0.457	0.04653	0.00003-69.5960	0.148	0.53443	0.22868-1.24898	0.02	0.45389	0.23271-0.88526	0.374	0.52253	0.14170-1.92693	0.334	0.52676	0.16252-1.70731	0.69959	0.57286	0.798	2.60193	5	0.76107	2.22585	4	0.6943	2.40078e-26	0.118137
ebi-a-GCST90027714	81	0.142	0.1206	0.00736-1.9765	0.279	0.77017	0.47989-1.23603	0.021	0.65817	0.46172-0.93821	0.635	0.76917	0.26151-2.26228	0.621	0.76917	0.27259-2.17035	0.16596	0.2341	1	19.6515	80	1	18.2139	79	1	0	0.434811
ebi-a-GCST90027796	81	0.132	0.11132	0.00657-1.8865	0.27	0.77066	0.48488-1.22487	0.021	0.65869	0.46229-0.93854	0.638	0.76505	0.25201-2.32248	0.637	0.76505	0.25254-2.31768	0.17322	0.21827	1	19.5872	80	1	18.0471	79	1	0	0.434827
ebi-a-GCST90027508	41	0.619	0.41846	0.01389-12.6056	0.234	0.6502	0.31987-1.32165	0.022	0.53359	0.31134-0.91448	0.551	0.65624	0.16608-2.59303	0.556	0.66368	0.17147-2.56886	0.02118	0.88807	1	12.476	40	0.99999	12.4559	39	0.99998	1.01777e-190	0.402359
ebi-a-GCST90027710	15	0.158	36.5494	0.33073-4039.0695	0.001	0.15712	0.05047-0.48915	0.023	0.33322	0.12964-0.85646	0.041	0.14876	0.02830-0.78201	0.05	0.14876	0.02600-0.85114	-0.42533	0.06802	0.197	18.9896	14	0.16535	14.5548	13	0.33596	1.71463e-63	0.309842
ebi-a-GCST90027568	24	0.274	0.05775	0.00040-8.4169	0.253	1.87499	0.63805-5.50986	0.024	2.51303	1.12996-5.58900	0.059	15.3118	1.03851-225.75703	0.058	14.6702	1.05084-204.80363	0.35225	0.14709	0.159	30.181	23	0.14428	27.3709	22	0.19748	1.9304e-108	0.990556
ebi-a-GCST90027702	60	0.42	1.61995	0.50554-5.1909	0.064	1.31456	0.98436-1.75552	0.024	1.26486	1.03151-1.55101	0.5	1.29607	0.61234-2.74324	0.463	1.30529	0.64339-2.64814	-0.04492	0.67387	0.956	41.4081	59	0.96019	41.2291	58	0.95308	5.30446e-277	0.212901
ebi-a-GCST90027729	16	0.72	2.80446	0.01126-698.7383	0.002	0.229	0.08937-0.58677	0.024	0.42957	0.20581-0.89661	0.09	0.21402	0.04048-1.13162	0.083	0.21402	0.04197-1.09122	-0.19831	0.51226	0.977	6.66905	15	0.96619	6.2169	14	0.96072	1.75276e-69	0.252602
ebi-a-GCST90027803	10	0.214	5.40948	0.46717-62.6372	0.007	2.5482	1.28821-5.04057	0.028	1.80886	1.06688-3.06685	0.123	2.58903	0.86538-7.74585	0.083	2.58903	0.99569-6.73212	-0.30866	0.39536	0.463	8.94107	9	0.44273	8.12219	8	0.42163	6.58978e-45	0.316459
ebi-a-GCST90027482	27	0.005	57.4541	4.50646-732.4973	0.051	2.68984	0.99764-7.25236	0.028	2.06818	1.08115-3.95631	0.265	3.39017	0.41565-27.65104	0.146	4.14512	0.64664-26.57138	-0.35788	0.01385	0.553	24.5768	26	0.54302	17.5697	25	0.8601	2.24302e-123	0.896174
ebi-a-GCST90027645	56	0.014	14.7959	1.85776-117.8396	0.495	1.25729	0.65178-2.42530	0.029	1.66573	1.05236-2.63662	0.881	1.13275	0.22461-5.71267	0.878	1.13275	0.23362-5.49231	-0.21593	0.03901	0.953	38.0636	55	0.96022	33.5882	54	0.98679	2.23831e-268	0.819597
ebi-a-GCST90027455	31	0.591	2.13128	0.13949-32.5631	0.625	1.20414	0.57203-2.53473	0.032	1.89153	1.05706-3.38473	0.828	1.17199	0.28297-4.85401	0.833	1.17199	0.27105-5.06758	-0.01066	0.93063	0.99	14.5035	30	0.99226	14.4957	29	0.98856	2.72208e-150	0.83463
ebi-a-GCST90027630	31	0.889	1.76953	0.00061-5126.8719	0.3	1.63908	0.64345-4.17528	0.035	0.47299	0.23575-0.94897	0.412	2.54615	0.28098-23.07271	0.372	2.54615	0.33731-19.21910	-0.11267	0.747	0.101	40.9853	30	0.08715	40.8359	29	0.07117	4.63756e-142	0.400943
ebi-a-GCST90027607	19	0.676	0.45523	0.01215-17.0493	0.048	2.78874	1.01011-7.69926	0.036	2.28231	1.05392-4.94245	0.293	2.81558	0.43274-18.31937	0.274	2.77734	0.47049-16.39493	0.16559	0.38449	0.983	7.44761	18	0.98578	6.65075	17	0.98764	1.03457e-83	0.888407
ebi-a-GCST90027815	23	0.058	0.15787	0.02606-0.9565	0.001	2.61789	1.49144-4.59514	0.037	1.56124	1.02801-2.37106	0.055	2.79315	1.03365-7.54771	0.065	2.79315	0.99039-7.87741	0.41537	0.01812	0.838	15.5883	22	0.83578	9.01922	21	0.98906	1.18267e-103	0.341305
ebi-a-GCST90027603	12	0.302	6.74872	0.21628-210.5885	0.05	3.73115	1.00235-13.88878	0.037	2.81229	1.06616-7.41817	0.11	5.60964	0.80262-39.20661	0.13	5.30484	0.72053-39.05645	-0.09995	0.61455	0.638	9.03975	11	0.61822	8.76961	10	0.5541	8.20187e-56	0.958459
ebi-a-GCST90027525	31	0.27	3.17016	0.42466-23.6656	0.073	2.06524	0.93363-4.56845	0.039	1.86119	1.03049-3.36152	0.442	1.86864	0.38764-9.00781	0.413	1.89811	0.41862-8.60654	-0.06034	0.59109	0.988	14.9486	30	0.99003	14.6535	29	0.98753	1.91815e-146	0.799223
ebi-a-GCST90027755	82	0.001	2.89984	1.60552-5.2376	0.001	1.4504	1.15479-1.82168	0.04	1.18167	1.00784-1.38548	0.12	1.50769	0.90362-2.51556	0.072	1.4716	0.97080-2.23076	-0.19416	0.00275	0.998	50.5322	81	0.99683	40.9827	80	0.99991	0	0.200821
ebi-a-GCST90027751	35	0.053	0.06556	0.00460-0.9354	0.022	2.62087	1.14854-5.98061	0.041	1.81837	1.02498-3.22590	0.045	6.53625	1.12059-38.12515	0.109	4.28708	0.75596-24.31203	0.33984	0.01719	0.64	30.774	34	0.62654	24.4778	33	0.85811	1.11551e-160	0.798368
ebi-a-GCST90027654	45	0.001	121.516	7.75611-1903.7978	0	3.94181	2.00403-7.75331	0.041	1.68461	1.02081-2.78007	0.068	4.18807	0.93461-18.76707	0.056	4.18807	1.00046-17.53191	-0.39781	0.00341	0.555	42.1762	44	0.55005	32.5695	43	0.87651	3.38317e-207	0.750403
ebi-a-GCST90027740	45	0.001	121.307	7.74027-1901.1486	0	3.94241	2.00421-7.75498	0.041	1.68454	1.02073-2.78005	0.068	4.18891	0.93449-18.77706	0.056	4.18891	1.00204-17.51136	-0.39763	0.00343	0.555	42.1775	44	0.54999	32.5806	43	0.87621	3.66021e-207	0.750251
ebi-a-GCST90027856	19	0.19	5.04532	0.49350-51.5810	0.044	2.75572	1.02785-7.38826	0.041	2.19022	1.03110-4.65236	0.116	3.78676	0.77904-18.40678	0.127	3.71327	0.74503-18.50702	-0.09565	0.46722	0.999	5.92552	18	0.99649	5.37245	17	0.99651	1.45885e-83	0.837048
ebi-a-GCST90027512	22	0.153	0.03771	0.00050-2.8419	0.097	2.4169	0.85322-6.84633	0.043	2.45322	1.02784-5.85529	0.034	13.7991	1.42081-134.01928	0.055	12.8484	1.09302-151.03242	0.39928	0.06815	0.016	39.1824	21	0.00933	33.0402	20	0.0334	3.81405e-94	0.973078
ebi-a-GCST90027797	31	0.82	1.55981	0.03482-69.8758	0.635	1.21762	0.54055-2.74273	0.044	1.86853	1.01663-3.43427	0.796	1.22417	0.26837-5.58398	0.805	1.22417	0.24898-6.01896	0.01517	0.92551	0.989	15.0591	30	0.9894	15.0503	29	0.98462	5.18658e-141	0.791928
ebi-a-GCST90027491	33	0.226	4.3959	0.41975-46.0365	0.25	0.60467	0.25653-1.42527	0.046	0.55086	0.30638-0.99044	0.047	0.15203	0.02550-0.90629	0.064	0.18383	0.03249-1.04006	-0.20584	0.08362	0.408	33.2765	32	0.4049	30.0809	31	0.51312	6.53499e-157	0.330038
ebi-a-GCST90027566	19	0.087	15.3297	0.80312-292.6095	0.965	0.97493	0.30961-3.06996	0.047	0.40315	0.16461-0.98736	0.943	1.08714	0.11317-10.44367	0.912	1.11293	0.16973-7.29754	-0.36078	0.02252	0.145	25.2091	18	0.11926	18.3962	17	0.36427	1.63302e-86	0.331313
ebi-a-GCST90027788	46	0	0.00041	0.00001-0.0206	0.355	1.19295	0.82052-1.73441	0.049	0.75056	0.56373-0.99932	0.558	1.29883	0.54533-3.09345	0.528	1.29883	0.57974-2.90984	1.16299	0.00048	0.994	23.9585	45	0.99576	9.71775	44	1	4.75376e-212	0.161613
ebi-a-GCST90027850	8	0.245	6.48679	0.37777-111.3875	0.255	1.71548	0.67792-4.34104	0.053	1.98114	0.99246-3.95473	0.484	1.7122	0.41085-7.13557	0.475	1.7122	0.42348-6.92275	-0.20715	0.43158	0.504	6.61628	7	0.46989	5.90575	6	0.43383	3.4981e-35	0.353787
ebi-a-GCST90027558	136	0	0.1707	0.07488-0.3891	0.334	1.16257	0.85619-1.57859	0.056	0.80437	0.64322-1.00590	0.065	3.14905	0.93969-10.55297	0.068	3.06303	0.93064-10.08141	0.22319	0.0002	0.351	141.128	135	0.34168	126.504	134	0.66488	0	0.257295
ebi-a-GCST90027621	22	0.395	0.12294	0.00109-13.8711	0.056	2.47553	0.97759-6.26872	0.056	1.95818	0.98161-3.90631	0.251	2.71234	0.51802-14.20165	0.253	2.71234	0.51422-14.30663	0.2783	0.25952	0.78	15.6984	21	0.78635	14.3516	20	0.81223	8.44535e-101	0.742483
ebi-a-GCST90027582	24	0.505	0.34015	0.01500-7.7147	0.87	0.92547	0.36538-2.34414	0.059	0.52649	0.27068-1.02406	0.819	1.25881	0.17929-8.83832	0.826	1.25881	0.16539-9.58115	0.04131	0.78153	0.6	20.9198	23	0.58599	20.8409	22	0.53059	1.60471e-106	0.264541
ebi-a-GCST90027765	43	0.56	0.52125	0.05918-4.5911	0.499	1.24803	0.65645-2.37271	0.063	0.65516	0.41980-1.02247	0.398	2.17158	0.36687-12.85413	0.406	2.17158	0.35450-13.30262	0.02215	0.83429	0.447	42.2316	42	0.46096	42.186	41	0.41947	2.72554e-208	0.265137
ebi-a-GCST90027461	45	0.889	1.26861	0.04596-35.0186	0.195	1.50029	0.81208-2.77174	0.066	1.60199	0.97013-2.64538	0.541	1.49297	0.41767-5.33662	0.573	1.47558	0.38511-5.65384	0.01849	0.88976	1	7.74441	44	1	7.72497	43	1	9.40128e-222	0.655252
ebi-a-GCST90027793	54	0.413	0.25314	0.00972-6.5939	0.014	2.18202	1.17129-4.06493	0.068	1.54859	0.96868-2.47568	0.165	2.5283	0.69525-9.19419	0.187	2.5283	0.64968-9.83911	0.15824	0.27623	1	17.5308	53	1	16.3199	52	1	5.99258e-251	0.626914
ebi-a-GCST90027591	87	0.038	5.98802	1.13617-31.5591	0.019	1.51877	1.07196-2.15182	0.068	1.25007	0.98360-1.58873	0.332	1.57364	0.63274-3.91368	0.285	1.57364	0.68904-3.59388	-0.20115	0.06537	0.595	82.3592	86	0.59118	78.874	85	0.66646	0	0.265269
ebi-a-GCST90027493	8	0.254	2.97	0.54705-16.1244	0.064	1.66893	0.96993-2.87165	0.07	1.47124	0.96828-2.23547	0.258	1.72003	0.72513-4.07995	0.234	1.72003	0.76077-3.88882	-0.22084	0.43314	0.864	3.25388	7	0.86057	2.54842	6	0.86301	5.82042e-38	0.123116
ebi-a-GCST90027806	35	0	0.05498	0.01475-0.2050	0	0.36664	0.23325-0.57633	0.072	0.70373	0.48005-1.03163	0.027	0.35233	0.14539-0.85384	0.018	0.35233	0.15442-0.80390	0.48855	0.00043	0.026	53.649	34	0.01731	36.6326	33	0.30392	1.14586e-159	0.174342
ebi-a-GCST90027774	55	0.206	0.23449	0.02544-2.1618	0.016	1.96654	1.13446-3.40892	0.074	1.45818	0.96429-2.20501	0.288	1.96558	0.57140-6.76141	0.267	1.96558	0.60275-6.40975	0.18138	0.10666	1	10.7433	54	1	8.04957	53	1	1.41566e-257	0.485804
ebi-a-GCST90027628	22	0.021	26.4877	2.01998-347.3280	0.29	1.59554	0.67115-3.79313	0.076	1.84725	0.93697-3.64186	0.433	1.95234	0.37832-10.07522	0.569	1.63672	0.30785-8.70173	-0.30881	0.04837	0.998	7.53691	21	0.99682	3.11628	20	0.99999	1.11795e-108	0.662086
ebi-a-GCST90027716	27	0.788	1.69857	0.03700-77.9812	0.655	1.21705	0.51361-2.88393	0.08	1.79546	0.93311-3.45479	0.836	1.19856	0.22037-6.51889	0.826	1.19856	0.24183-5.94041	0.00467	0.97722	0.985	13.0982	26	0.98308	13.0973	25	0.97529	1.98791e-121	0.656595
ebi-a-GCST90027530	21	0.06	0.00056	0.00000-0.8599	0.339	0.63666	0.25214-1.60758	0.085	0.54568	0.27360-1.08835	0.69	0.70124	0.12585-3.90721	0.704	0.71855	0.13361-3.86445	0.59041	0.08044	0.987	8.70212	20	0.98611	5.29204	19	0.99914	4.78269e-106	0.243151
ebi-a-GCST90027762	18	0.551	0.23562	0.00225-24.6707	0.458	0.68776	0.25576-1.84941	0.087	0.51325	0.23886-1.10286	0.976	0.97402	0.17668-5.36976	0.986	0.98428	0.18107-5.35052	0.06755	0.74374	0.997	4.34188	17	0.99911	4.23124	16	0.99844	5.82598e-81	0.219044
ebi-a-GCST90027731	16	0.091	0.01049	0.00008-1.4457	0.024	2.1619	1.10530-4.22858	0.088	1.61252	0.93179-2.79054	0.188	2.27873	0.70674-7.34729	0.197	2.25719	0.69294-7.35257	0.84811	0.06341	0.998	4.52207	15	0.99546	0.45782	14	1	3.73037e-71	0.286837
ebi-a-GCST90027722	34	0	0.05229	0.01349-0.2027	0	0.36349	0.22106-0.59768	0.094	0.71348	0.48076-1.05886	0.021	0.34615	0.14718-0.81415	0.017	0.34931	0.15408-0.79194	0.50363	0.00047	0.014	53.6707	33	0.01293	36.3909	32	0.27155	2.08439e-154	0.162445
ebi-a-GCST90027510	17	0.014	164.633	4.51241-6006.5403	0.104	0.35746	0.10349-1.23471	0.095	0.44187	0.16922-1.15385	0.221	0.18491	0.01373-2.48978	0.232	0.20284	0.01636-2.51447	-0.55538	0.00472	0.157	21.7098	16	0.15281	10.7253	15	0.77181	4.70682e-72	0.255436
ebi-a-GCST90027641	12	0.553	3.86491	0.05154-289.7997	0.484	0.59654	0.14024-2.53754	0.1	0.40675	0.13937-1.18705	0.882	0.80906	0.05215-12.55160	0.955	0.92426	0.06538-13.06525	-0.23225	0.31633	0.31	12.7643	11	0.30901	11.4863	10	0.32091	2.84378e-51	0.213621
ebi-a-GCST90027792	25	0.102	0.10289	0.00749-1.4125	0.048	1.89265	1.00691-3.55754	0.102	1.46644	0.92740-2.31879	0.182	2.32178	0.69760-7.72744	0.17	2.44058	0.71001-8.38922	0.32733	0.05527	0.971	12.5978	24	0.9723	8.52065	23	0.99733	1.36915e-116	0.274214
ebi-a-GCST90027533	73	0.534	2.35236	0.16093-34.3840	0.212	0.68613	0.37964-1.24006	0.103	0.71803	0.48222-1.06915	0.583	0.66257	0.15354-2.85926	0.564	0.66257	0.16445-2.66952	-0.0974	0.38352	0.52	70.2422	72	0.53664	69.4734	71	0.52908	0	0.283818
ebi-a-GCST90027665	18	0.517	0.2097	0.00207-21.2557	0.742	0.85224	0.32875-2.20935	0.105	0.52944	0.24567-1.14100	0.983	1.01944	0.18396-5.64934	0.982	1.01944	0.18749-5.54302	0.08008	0.69548	0.997	4.48391	17	0.99889	4.32506	16	0.99822	1.64233e-80	0.206827
ebi-a-GCST90027697	31	0.282	6.67618	0.22465-198.4016	0	0.21047	0.09342-0.47415	0.105	0.57462	0.29412-1.12265	0.029	0.12441	0.02098-0.73765	0.027	0.12825	0.02285-0.71986	-0.21855	0.15925	0.074	42.5808	30	0.06377	39.7219	29	0.08859	3.50837e-141	0.279669
ebi-a-GCST90027689	63	0.006	0.29094	0.12393-0.6830	0.428	0.8682	0.61232-1.23101	0.106	1.24248	0.95462-1.61715	0.607	0.8197	0.38553-1.74281	0.589	0.8197	0.39971-1.68099	0.29988	0.00086	1	25.1797	62	0.99999	12.8895	61	1	0	0.200024
ebi-a-GCST90027451	18	0.05	0.00619	0.00006-0.6883	0.967	0.97752	0.33039-2.89217	0.107	1.88595	0.87124-4.08249	0.695	0.642	0.07291-5.65297	0.687	0.68038	0.10810-4.28216	0.52898	0.02824	0.519	16.2819	17	0.50394	10.4649	16	0.84125	2.25399e-83	0.596381
ebi-a-GCST90027585	25	0.002	659.463	17.24668-25215.9870	0.044	2.31611	1.02101-5.25397	0.108	1.67864	0.89196-3.15916	0.258	2.3125	0.55988-9.55139	0.248	2.3125	0.57664-9.27376	-0.73486	0.00342	0.98	12.0433	24	0.97942	1.39865	23	1	1.63545e-118	0.512414
ebi-a-GCST90027728	8	0.625	2.36336	0.08928-62.5640	0.508	1.39058	0.52344-3.69425	0.113	1.8545	0.86324-3.98403	0.671	1.36248	0.34622-5.36185	0.651	1.35316	0.38653-4.73707	-0.03539	0.8863	0.741	4.44633	7	0.72717	4.42407	6	0.61949	2.17055e-35	0.280004
ebi-a-GCST90027694	19	0.476	0.18469	0.00197-17.3155	0.814	0.89223	0.34533-2.30524	0.114	0.54707	0.25874-1.15671	0.974	1.02867	0.19544-5.41412	0.973	1.02867	0.20060-5.27497	0.09313	0.64066	1	4.62642	18	0.99933	4.40057	17	0.99902	6.52389e-85	0.202926
ebi-a-GCST90027606	42	0.597	1.32836	0.46753-3.7742	0.241	1.2174	0.87631-1.69126	0.117	1.21588	0.95231-1.55238	0.653	0.85115	0.42331-1.71139	0.646	0.8573	0.44675-1.64513	-0.01982	0.86523	1	16.1171	41	0.99983	16.0879	40	0.99973	4.17823e-197	0.126859
ebi-a-GCST90027457	14	0.155	0.05384	0.00123-2.3513	0.663	0.75646	0.21560-2.65416	0.118	0.48333	0.19433-1.20213	0.09	0.12845	0.01434-1.15074	0.109	0.13921	0.01473-1.31577	0.22548	0.2633	0.629	11.2991	13	0.58577	9.9217	12	0.62283	1.11565e-62	0.20011
ebi-a-GCST90027637	55	0.327	3.7646	0.27295-51.9215	0.527	0.83303	0.47326-1.46629	0.119	1.35423	0.92507-1.98248	0.795	0.84362	0.23540-3.02340	0.792	0.84362	0.23926-2.97458	-0.12088	0.44363	0.698	48.5431	54	0.68408	47.9473	53	0.67074	3.01348e-265	0.331762
ebi-a-GCST90027556	22	0.926	1.20243	0.02631-54.9537	0.382	1.4731	0.61834-3.50945	0.119	1.74734	0.86581-3.52644	0.625	1.52113	0.28996-7.97980	0.647	1.52113	0.25892-8.93635	0.04011	0.84738	0.998	7.63631	21	0.9965	7.59829	20	0.99421	3.39314e-96	0.507002
ebi-a-GCST90027564	14	0.737	0.48436	0.00773-30.3589	0.359	1.66731	0.55942-4.96932	0.126	1.85717	0.84040-4.10410	0.713	1.4708	0.19687-10.98808	0.707	1.49812	0.19052-11.78030	0.13407	0.52845	0.457	13.4878	13	0.41087	13.0302	12	0.36685	4.37114e-61	0.448347
ebi-a-GCST90027832	75	0	0.02732	0.00782-0.0955	0.055	0.60704	0.36496-1.00972	0.127	0.74518	0.51050-1.08774	0.12	0.3433	0.09049-1.30251	0.098	0.3433	0.09850-1.19658	0.34188	0	0.213	83.9995	74	0.19994	54.8288	73	0.94455	0	0.250922
ebi-a-GCST90027505	13	0.319	9.62514	0.13677-677.3831	0.274	0.48753	0.13459-1.76608	0.132	0.47697	0.18204-1.24970	0.532	0.49935	0.06011-4.14852	0.561	0.5247	0.06333-4.34694	-0.28784	0.18294	0.821	7.69366	12	0.80859	5.67343	11	0.89424	1.19574e-57	0.190332
ebi-a-GCST90027778	42	0.096	3.66446	0.82231-16.3300	0.108	1.66815	0.89407-3.11244	0.133	1.46396	0.89071-2.40615	0.452	1.63004	0.46221-5.74852	0.46	1.63004	0.45115-5.88953	-0.12219	0.20929	1	6.77157	41	1	5.1432	40	1	1.3672e-192	0.398535
ebi-a-GCST90027842	200	0.327	1.44101	0.69507-2.9875	0	0.7737	0.67799-0.88292	0.136	0.92562	0.83615-1.02466	0.177	0.75923	0.50989-1.13052	0.162	0.75923	0.51671-1.11558	-0.08393	0.23092	1	76.1843	199	1	74.7403	198	1	0	0.0950252
ebi-a-GCST90027626	86	0.298	0.47752	0.11962-1.9063	0.098	0.82167	0.65098-1.03711	0.138	0.87508	0.73371-1.04368	0.407	0.78469	0.44365-1.38788	0.437	0.79265	0.44241-1.42017	0.11785	0.38971	1	22.4415	85	1	21.6939	84	1	0	0.10446
ebi-a-GCST90027664	66	0.768	1.41658	0.14077-14.2550	0.462	1.22989	0.70873-2.13430	0.14	1.37067	0.90197-2.08292	0.773	1.18862	0.37010-3.81732	0.784	1.18862	0.34664-4.07571	-0.00308	0.9774	0.999	35.6517	65	0.99886	35.6509	64	0.99844	0	0.40469
ebi-a-GCST90027648	38	0.081	3.09669	0.90234-10.6273	0.56	0.88835	0.59687-1.32217	0.142	1.24504	0.92939-1.66788	0.633	0.81065	0.34529-1.90323	0.077	2.21412	0.94031-5.21351	-0.21165	0.14472	1	15.4328	37	0.99932	13.2103	36	0.99982	9.91683e-170	0.136465
ebi-a-GCST90027672	59	0	13.3378	4.56529-38.9671	0.004	1.85849	1.22065-2.82961	0.147	1.27033	0.91915-1.75569	0.17	1.85634	0.77544-4.44394	0.186	1.85634	0.75078-4.58990	-0.46246	3e-05	0.98	38.3539	58	0.9783	18.0241	57	1	1.35272e-301	0.232675
ebi-a-GCST90027775	30	0.001	456.323	18.88459-11026.5037	0.437	0.71757	0.31080-1.65670	0.155	0.64725	0.35548-1.17850	0.772	0.76489	0.12642-4.62789	0.787	0.77921	0.12947-4.68947	-0.64173	0.00031	0.663	25.2478	29	0.66533	8.36047	28	0.99988	1.06416e-133	0.196915
ebi-a-GCST90027507	56	0.368	3.23231	0.25664-40.7094	0.212	1.43379	0.81439-2.52429	0.164	1.35798	0.88267-2.08925	0.595	1.40896	0.40107-4.94965	0.55	1.42702	0.44778-4.54779	-0.0936	0.49886	1	12.7179	55	1	12.2543	54	1	1.68008e-298	0.361805
ebi-a-GCST90027498	31	0.014	0.01389	0.00056-0.3460	0.845	0.92545	0.42597-2.01058	0.17	1.49461	0.84222-2.65233	0.578	0.68139	0.17902-2.59343	0.561	0.66976	0.17616-2.54647	0.48388	0.00707	0.515	29.8039	30	0.47573	21.4033	29	0.84404	2.08702e-144	0.361971
ebi-a-GCST90027784	14	0.919	8.20358	0.00000-1624657975948640000.0000	0.287	0.79665	0.52436-1.21036	0.171	0.78334	0.55209-1.11145	0.506	0.79743	0.41691-1.52526	0.523	0.79743	0.40553-1.56805	-0.62839	0.90989	1	0.03239	13	1	0.01903	12	1	1.83357e-62	0.0744375
ebi-a-GCST90027494	46	0.025	0.20461	0.05334-0.7849	0.024	0.61824	0.40772-0.93746	0.172	0.80924	0.59734-1.09630	0.201	0.57035	0.24446-1.33071	0.143	0.53947	0.23956-1.21486	0.24918	0.04557	0.993	24.2293	45	0.99519	19.9952	44	0.9993	1.43988e-246	0.12388
ebi-a-GCST90027758	55	0.003	0.2453	0.10038-0.5994	0.324	0.82342	0.55950-1.21182	0.181	1.21253	0.91429-1.60804	0.593	0.8089	0.37316-1.75346	0.559	0.8089	0.39881-1.64070	0.326	0.00052	0.999	24.6454	54	0.9998	10.994	53	1	1.63808e-268	0.149712
ebi-a-GCST90027511	22	0.768	1.44475	0.12914-16.1627	0.019	1.98789	1.12184-3.52252	0.183	1.32996	0.87451-2.02262	0.177	2.18221	0.73046-6.51929	0.211	2.19588	0.66462-7.25508	-0.01212	0.94628	0.944	11.917	21	0.94183	11.9123	20	0.91906	4.30333e-98	0.143205
ebi-a-GCST90027709	197	0.077	2.10199	0.92542-4.7745	0	0.77519	0.68352-0.87915	0.187	0.93356	0.84284-1.03405	0.167	0.76235	0.51957-1.11857	0.175	0.76235	0.51573-1.12690	-0.15315	0.0521	1	69.5154	196	1	65.6962	195	1	0	0.0855223
ebi-a-GCST90027813	14	0.862	1.61006	0.00853-304.0177	0.94	1.04747	0.31094-3.52858	0.191	1.89802	0.72666-4.95759	0.841	0.82125	0.12511-5.39096	0.829	0.82125	0.14190-4.75311	0.01489	0.95105	0.285	15.8436	13	0.25768	15.8384	12	0.19875	5.80716e-61	0.483605
ebi-a-GCST90027577	41	0.758	0.84248	0.28589-2.4826	0.55	0.89423	0.62008-1.28959	0.193	0.82765	0.62270-1.10005	0.779	0.89214	0.40351-1.97248	0.77	0.89214	0.41712-1.90808	-0.00334	0.97354	1	8.67539	40	1	8.67427	39	1	1.94833e-190	0.096535
ebi-a-GCST90027617	22	0.484	0.34802	0.01910-6.3411	0.766	0.8722	0.35380-2.15019	0.197	0.64075	0.32586-1.25991	0.585	1.64817	0.28237-9.62004	0.594	1.64817	0.26938-10.08402	0.06952	0.67621	0.988	9.4069	21	0.98563	9.22727	20	0.98012	4.79751e-102	0.16495
ebi-a-GCST90027518	11	0.659	0.36377	0.00472-28.0279	0.103	2.80625	0.81173-9.70154	0.204	1.88051	0.70970-4.98286	0.238	3.35064	0.50647-22.16648	0.239	3.3916	0.50067-22.97526	0.15061	0.4664	0.834	5.79568	10	0.83213	5.21729	9	0.81497	1.27868e-51	0.402776
ebi-a-GCST90027743	69	0.001	0.02596	0.00325-0.2075	0.028	0.53305	0.30446-0.93327	0.209	0.77038	0.51269-1.15758	0.286	0.48761	0.13175-1.80461	0.315	0.49453	0.12641-1.93472	0.29946	0.00175	0.912	52.7603	68	0.91328	42.1325	67	0.99251	0	0.197375
ebi-a-GCST90027529	16	0.864	1.81206	0.00230-1426.4344	0.218	0.459	0.13286-1.58570	0.22	0.49694	0.16242-1.52044	0.308	0.36837	0.05754-2.35849	0.376	0.39194	0.05249-2.92637	-0.12019	0.70526	0.016	28.5284	15	0.01849	28.2279	14	0.01327	1.10457e-72	0.219038
ebi-a-GCST90027580	12	0.006	42.9342	5.30374-347.5560	0.859	0.94709	0.51992-1.72524	0.224	1.42956	0.80347-2.54352	0.898	0.9411	0.37929-2.33508	0.885	0.9411	0.42012-2.10812	-0.72679	0.00861	0.051	20.0409	11	0.04478	9.43065	10	0.49178	1.45469e-54	0.140871
ebi-a-GCST90027693	67	0.826	0.7761	0.08215-7.3324	0.473	1.23008	0.69837-2.16662	0.23	1.28897	0.85135-1.95153	0.773	1.18949	0.36816-3.84309	0.784	1.18949	0.34583-4.09133	0.04775	0.65385	0.998	40.5443	66	0.99428	40.3413	65	0.99303	0	0.271415
ebi-a-GCST90027705	49	0	0.00028	0.00001-0.0147	0.271	1.2292	0.85130-1.77486	0.236	0.84583	0.64125-1.11567	0.519	1.32729	0.56516-3.11717	0.522	1.31929	0.56891-3.05940	1.23593	0.00024	1	23.5803	48	0.99883	7.72327	47	1	1.06841e-227	0.0943821
ebi-a-GCST90027657	67	0.001	0.02331	0.00270-0.2015	0.034	0.53611	0.30099-0.95490	0.243	0.78208	0.51775-1.18136	0.336	0.49843	0.12195-2.03712	0.31	0.49843	0.13140-1.89060	0.30823	0.00182	0.899	52.6374	66	0.88362	42.0583	65	0.98789	0	0.178723
ebi-a-GCST90027553	68	0.396	2.14136	0.37273-12.3024	0.294	0.75665	0.44956-1.27350	0.243	0.79364	0.53823-1.17027	0.142	0.36839	0.09874-1.37442	0.1	0.36839	0.11399-1.19059	-0.10683	0.2579	1	34.0695	67	0.99973	32.7671	66	0.9998	0	0.166545
ebi-a-GCST90027488	59	0.33	2.11219	0.47516-9.3891	0.127	0.69359	0.43333-1.11019	0.247	0.8147	0.57575-1.15281	0.322	0.64781	0.27645-1.51807	0.319	0.62067	0.24468-1.57440	-0.12186	0.20331	1	23.8699	58	0.99998	22.2136	57	0.99999	0	0.173441
ebi-a-GCST90027540	56	0.361	0.31024	0.02578-3.7330	0.043	1.8654	1.02008-3.41122	0.249	1.29825	0.83298-2.02342	0.343	1.87214	0.51847-6.76012	0.337	1.87214	0.52633-6.65912	0.1321	0.25676	0.985	34.1068	55	0.98794	32.7931	54	0.99	5.30974e-278	0.256865
ebi-a-GCST90027718	24	0.608	0.40693	0.01379-12.0108	0.536	0.76597	0.32919-1.78231	0.254	0.68318	0.35512-1.31430	0.818	0.84317	0.20068-3.54261	0.844	0.86038	0.19646-3.76803	0.05102	0.76265	1	6.45834	23	0.99972	6.36484	22	0.99952	1.81628e-107	0.142848
ebi-a-GCST90027685	10	0.749	2.2729	0.01775-290.9843	0.233	0.60101	0.26037-1.38730	0.26	0.69555	0.36984-1.30813	0.418	0.60334	0.18762-1.94015	0.418	0.60334	0.18802-1.93604	-0.24923	0.64242	0.491	8.26837	9	0.50734	8.03463	8	0.4301	3.60263e-43	0.0845258
ebi-a-GCST90027746	10	0.747	2.28678	0.01787-292.5611	0.233	0.60102	0.26038-1.38729	0.26	0.69564	0.36990-1.30825	0.418	0.60317	0.18752-1.94009	0.418	0.60317	0.18790-1.93621	-0.2505	0.64073	0.491	8.2691	9	0.50727	8.03297	8	0.43026	3.56586e-43	0.0845095
ebi-a-GCST90027763	17	0.803	1.44482	0.08455-24.6881	0.351	0.63981	0.25008-1.63690	0.271	0.65742	0.31145-1.38771	0.437	0.50481	0.09402-2.71035	0.502	0.52822	0.08565-3.25765	-0.09995	0.58134	0.99	6.56884	16	0.9807	6.25117	15	0.97521	7.32669e-78	0.129169
ebi-a-GCST90027541	62	0.53	0.50968	0.06307-4.1186	0.38	1.30296	0.72132-2.35360	0.277	1.26162	0.82942-1.91903	0.784	1.22119	0.29400-5.07243	0.776	1.22119	0.30985-4.81301	0.0805	0.38893	0.564	58.6468	61	0.56169	57.8936	60	0.5531	2.9388e-293	0.218111
ebi-a-GCST90027727	146	0.47	0.5221	0.08986-3.0336	0.749	1.04185	0.81086-1.33864	0.285	1.11648	0.91232-1.36632	0.917	1.03761	0.52009-2.07011	0.914	1.03761	0.53355-2.01789	0.10775	0.39549	1	8.12411	145	1	7.39779	144	1	0	0.12621
ebi-a-GCST90027733	14	0.78	1.87945	0.02472-142.8925	0.148	0.60772	0.30974-1.19236	0.29	0.7542	0.44737-1.27146	0.442	0.60921	0.17896-2.07390	0.417	0.60921	0.19125-1.94060	-0.19187	0.68458	0.967	5.74429	13	0.95497	5.57103	12	0.93615	1.52318e-62	0.0822026
ebi-a-GCST90027811	143	0.484	0.53677	0.09428-3.0560	0.757	1.04185	0.80357-1.35078	0.294	1.11568	0.90946-1.36865	0.922	1.03701	0.50044-2.14890	0.923	1.03701	0.49836-2.15785	0.10332	0.4078	1	8.12527	142	1	7.43596	141	1	0	0.123358
ebi-a-GCST90027812	18	0.775	2.26565	0.00905-567.3048	0.822	0.89872	0.35427-2.27987	0.305	0.69765	0.35071-1.38781	0.755	1.32117	0.23551-7.41137	0.751	1.32117	0.24308-7.18073	-0.12652	0.67915	0.96	8.54364	17	0.9535	8.36616	16	0.93721	2.01574e-79	0.112762
ebi-a-GCST90027563	13	0.665	0.7296	0.18189-2.9267	0.316	1.35379	0.74933-2.44586	0.307	1.26237	0.80708-1.97448	0.512	1.39258	0.53253-3.64160	0.499	1.37747	0.56019-3.38709	0.13273	0.4305	0.414	12.5579	12	0.40197	11.8372	11	0.37601	7.60574e-61	0.0863449
ebi-a-GCST90027627	12	0.335	147.637	0.00936-2328881.5847	0.192	0.46601	0.14807-1.46662	0.31	0.62007	0.24659-1.55920	0.328	0.39926	0.06876-2.31843	0.326	0.39392	0.06676-2.32445	-0.67819	0.29102	0.994	2.35775	11	0.99679	1.11502	10	0.99972	7.54517e-55	0.117748
ebi-a-GCST90027472	5	0.701	2.42067	0.04039-145.0832	0.842	0.89864	0.31502-2.56355	0.31	0.64708	0.27934-1.49890	0.892	0.90212	0.22247-3.65808	0.887	0.90212	0.23746-3.42722	-0.26817	0.56458	0.824	1.61117	4	0.80678	1.19452	3	0.75432	1.04672e-23	0.0743326
ebi-a-GCST90027485	17	0.413	18.4723	0.02071-16479.1278	0.093	0.40534	0.14123-1.16335	0.314	0.65249	0.28441-1.49696	0.318	0.35336	0.04892-2.55250	0.293	0.35867	0.05659-2.27311	-0.27733	0.34654	0.987	6.68716	16	0.97883	5.7427	15	0.98375	2.16892e-78	0.132062
ebi-a-GCST90027496	16	0.609	1.69688	0.23359-12.3268	0.103	1.63114	0.90644-2.93522	0.315	1.29632	0.78111-2.15135	0.36	1.60128	0.60327-4.25036	0.238	1.64923	0.74233-3.66407	-0.06455	0.78665	0.207	19.9987	15	0.17198	19.8906	14	0.13363	3.10685e-75	0.108237
ebi-a-GCST90027559	6	0.478	0.16803	0.00192-14.6829	0.045	2.64519	1.02406-6.83264	0.317	1.56861	0.64902-3.79116	0.151	2.92629	0.84461-10.13852	0.13	2.95193	0.91298-9.54445	0.43612	0.37429	0.243	7.51926	5	0.1848	6.01761	4	0.19784	1.96553e-27	0.127492
ebi-a-GCST90027772	66	0.023	0.05844	0.00537-0.6365	0.22	1.29026	0.85866-1.93880	0.32	0.8587	0.63590-1.15955	0.563	1.29817	0.53837-3.13029	0.549	1.29817	0.55507-3.03610	0.29321	0.02972	0.999	34.0001	65	0.99947	29.0563	64	0.99995	0	0.101407
ebi-a-GCST90027501	37	0.065	23.1002	0.91633-582.3396	0.497	1.30571	0.60431-2.82123	0.33	1.31291	0.75920-2.27048	0.385	0.47089	0.08789-2.52296	0.15	3.53806	0.65835-19.01397	-0.26347	0.08591	0.986	20.8932	36	0.97907	17.7701	35	0.99314	1.00611e-174	0.197458
ebi-a-GCST90027773	25	0.584	2.02122	0.16873-24.2119	0.431	1.23263	0.73268-2.07371	0.337	0.82472	0.55662-1.22196	0.546	1.35986	0.50867-3.63540	0.593	1.35986	0.44721-4.13506	-0.15408	0.48084	0.982	12.0363	24	0.9795	11.5228	23	0.97719	9.64543e-117	0.0802968
ebi-a-GCST90027711	62	0.587	0.2564	0.00193-34.0755	0.909	1.03223	0.60001-1.77581	0.342	0.81759	0.53969-1.23858	0.778	1.19583	0.34696-4.12153	0.79	1.17584	0.35927-3.84837	0.10333	0.64253	1	21.5834	61	1	21.3658	60	1	0	0.137772
ebi-a-GCST90027486	45	0.032	7.58448	1.26835-45.3537	0.63	0.92333	0.66755-1.27712	0.347	0.88984	0.69767-1.13494	0.765	0.90455	0.47107-1.73692	0.81	0.91691	0.45380-1.85265	-0.42845	0.02232	1	17.2001	44	0.99991	11.5809	43	1	3.14817e-226	0.0721726
ebi-a-GCST90027534	11	0.249	155.849	0.05039-482003.0979	0.717	1.31046	0.30371-5.65452	0.355	1.72306	0.54391-5.45851	0.621	1.82519	0.18144-18.35993	0.627	1.79129	0.18342-17.49382	-0.39891	0.29584	0.25	12.6232	10	0.24551	11.1036	9	0.26868	1.00101e-46	0.271563
ebi-a-GCST90027504	52	0.038	0.04025	0.00210-0.7726	0.14	1.68949	0.84265-3.38739	0.363	1.26399	0.76290-2.09420	0.038	9.17578	1.19170-70.65107	0.175	0.22035	0.02548-1.90556	0.36445	0.02459	0.122	62.7917	51	0.12447	56.6993	50	0.23942	9.66306e-248	0.197473
ebi-a-GCST90027854	27	0.626	2.78151	0.04809-160.8948	0.548	1.28031	0.57219-2.86475	0.368	1.30866	0.72899-2.34927	0.745	1.28347	0.28929-5.69438	0.72	1.28347	0.33224-4.95818	-0.07421	0.71594	0.799	20.0322	26	0.79003	19.8967	25	0.75222	7.06342e-124	0.153045
ebi-a-GCST90027821	48	0.138	3.81249	0.67192-21.6320	0.222	1.31911	0.84597-2.05686	0.37	0.86179	0.62244-1.19318	0.483	1.33523	0.59923-2.97522	0.471	1.32315	0.62191-2.81505	-0.18543	0.09426	0.422	48.01	47	0.43166	45.0905	46	0.51028	4.97746e-230	0.0863785
ebi-a-GCST90027633	42	0.279	3.02345	0.41982-21.7744	0.187	0.66506	0.36272-1.21939	0.373	0.81733	0.52434-1.27405	0.523	0.65177	0.17740-2.39467	0.514	0.65177	0.18229-2.33037	-0.14126	0.19016	0.996	20.8789	41	0.99621	19.1027	40	0.99792	2.68962e-193	0.103761
ebi-a-GCST90027537	8	0.431	14.6589	0.02861-7510.7769	0.563	1.54459	0.35343-6.75035	0.377	1.65724	0.53978-5.08805	0.749	1.46791	0.15371-14.01863	0.752	1.44135	0.16350-12.70668	-0.19772	0.51184	0.407	7.09131	7	0.41944	6.56003	6	0.36346	1.14839e-35	0.186444
ebi-a-GCST90027715	6	0.194	0.00118	0.00000-5.6130	0.733	1.15309	0.50922-2.61108	0.378	1.44871	0.63563-3.30185	0.92	0.92008	0.19574-4.32491	0.95	0.95597	0.25117-3.63844	1.38602	0.17382	0.121	9.88334	5	0.07861	5.87409	4	0.20875	1.96175e-26	0.0963304
ebi-a-GCST90027575	11	0.405	2.44043	0.33015-18.0392	0.255	1.54771	0.72916-3.28517	0.38	1.29671	0.72624-2.31530	0.483	1.57165	0.46573-5.30371	0.438	1.59074	0.51524-4.91119	-0.12998	0.53356	0.988	2.67171	10	0.98813	2.25263	9	0.98681	1.76574e-49	0.0868083
ebi-a-GCST90027818	20	0.391	0.17569	0.00365-8.4659	0.498	0.82315	0.46863-1.44588	0.381	0.82758	0.54175-1.26423	0.383	0.62321	0.22072-1.75969	0.61	1.28291	0.50096-3.28538	0.31832	0.44061	0.97	9.3222	19	0.96774	8.70029	18	0.96629	7.27693e-89	0.0723748
ebi-a-GCST90027732	23	0.624	0.51553	0.03777-7.0356	0.02	2.5527	1.16001-5.61741	0.384	1.32146	0.70555-2.47503	0.169	2.68365	0.68737-10.47763	0.169	2.68365	0.68768-10.47284	0.09779	0.47485	0.359	24.2231	22	0.33564	23.6274	21	0.31146	1.07283e-101	0.142922
ebi-a-GCST90027844	53	0.971	1.05153	0.06942-15.9287	0.467	0.82153	0.48387-1.39482	0.386	0.84242	0.57160-1.24157	0.729	0.80698	0.24178-2.69345	0.707	0.79879	0.24866-2.56602	-0.02424	0.8723	1	21.2135	52	0.99995	21.1874	51	0.99993	2.06485e-257	0.101808
ebi-a-GCST90027605	31	0.191	0.28608	0.04582-1.7862	0.417	0.75405	0.38129-1.49124	0.39	0.80978	0.50044-1.31033	0.133	0.24614	0.04151-1.45966	0.097	0.23881	0.04641-1.22878	0.16248	0.25812	0.149	38.484	30	0.13771	36.7957	29	0.15152	3.37613e-140	0.0937867
ebi-a-GCST90027593	49	0.152	0.3121	0.06503-1.4977	0.099	0.76654	0.55898-1.05118	0.393	0.90198	0.71179-1.14300	0.377	0.75809	0.41269-1.39259	0.4	0.75809	0.39999-1.43678	0.2216	0.18616	1	13.7152	48	1	11.9152	47	1	8.02589e-231	0.0677776
ebi-a-GCST90027497	8	0.478	0.04435	0.00001-142.7448	0.147	3.2621	0.66018-16.11884	0.4	1.69944	0.49453-5.84016	0.307	3.32548	0.39134-28.25884	0.314	3.32548	0.37957-29.13527	0.30865	0.40512	0.585	5.67116	7	0.57863	4.86963	6	0.56064	2.0501e-35	0.202991
ebi-a-GCST90027572	31	0.588	2.11064	0.14536-30.6459	0.022	2.81129	1.15704-6.83067	0.401	1.31114	0.69708-2.46614	0.161	3.21037	0.65338-15.77403	0.184	3.26845	0.59395-17.98609	-0.04656	0.72202	0.438	31.1998	30	0.40563	31.0616	29	0.36253	6.62444e-146	0.173917
ebi-a-GCST90027552	38	0.624	0.39514	0.00996-15.6827	0.646	0.82396	0.36064-1.88247	0.412	0.78512	0.44045-1.39948	0.179	4.42063	0.52643-37.12133	0.935	0.91319	0.10296-8.09948	0.07253	0.71334	0.433	37.7977	37	0.43269	37.6543	36	0.39342	9.58988e-175	0.119086
ebi-a-GCST90027713	56	0.407	2.51869	0.28824-22.0085	0.392	1.29817	0.71425-2.35947	0.413	1.20219	0.77357-1.86831	0.652	1.33194	0.38594-4.59675	0.649	1.33194	0.38956-4.55410	-0.07476	0.49752	1	20.7156	55	0.99999	20.2491	54	0.99999	1.24928e-277	0.142469
ebi-a-GCST90027516	24	0.703	0.30366	0.00072-128.9130	0.839	0.91276	0.37895-2.19850	0.422	0.75805	0.38532-1.49133	0.771	0.77549	0.14244-4.22211	0.781	0.78408	0.14443-4.25646	0.08805	0.76835	0.999	8.21841	23	0.99799	8.12948	22	0.9968	1.26697e-107	0.103614
ebi-a-GCST90027700	9	0.341	0.13975	0.00320-6.0956	0.753	1.23618	0.33047-4.62414	0.427	1.50281	0.55057-4.10199	0.933	1.09358	0.14426-8.29001	0.933	1.09358	0.14318-8.35253	0.27912	0.24161	0.794	4.61908	8	0.7974	2.98286	7	0.88658	7.84903e-40	0.137325
ebi-a-GCST90027578	36	0.415	0.44527	0.06529-3.0369	0.499	0.77224	0.36533-1.63235	0.427	0.79938	0.46001-1.38911	0.446	0.51502	0.09540-2.78032	0.461	0.52269	0.09510-2.87275	0.05623	0.53695	0.991	18.1756	35	0.99154	17.7866	34	0.99001	2.98267e-165	0.10603
ebi-a-GCST90027644	27	0.035	0.09219	0.01130-0.7519	0.2	0.54102	0.21143-1.38439	0.429	1.32655	0.65869-2.67159	0.416	0.44563	0.06566-3.02439	0.41	0.47041	0.08059-2.74569	0.29949	0.01457	0.321	28.9534	26	0.31321	22.0636	25	0.63207	3.00349e-121	0.164365
ebi-a-GCST90027804	5	0.366	0.04824	0.00018-12.9967	0.242	1.84629	0.66112-5.15614	0.431	1.37833	0.62057-3.06137	0.29	2.41751	0.58392-10.00882	0.324	2.37345	0.52582-10.71336	0.83982	0.32091	0.635	2.64394	4	0.61906	1.23672	3	0.74421	5.75835e-24	0.078456
ebi-a-GCST90027474	17	0.867	1.24814	0.09811-15.8785	0.379	0.70381	0.32184-1.53907	0.433	0.79276	0.44371-1.41637	0.541	0.65581	0.17429-2.46761	0.568	0.65581	0.15867-2.71052	-0.06867	0.7244	0.897	9.66675	16	0.88344	9.53767	15	0.84777	3.89927e-76	0.0779174
ebi-a-GCST90027801	11	0.117	129.613	0.53074-31652.9779	0.338	1.62091	0.60387-4.35083	0.435	1.34931	0.63611-2.86212	0.771	0.77597	0.14734-4.08654	0.761	0.77597	0.15798-3.81137	-0.59438	0.13484	0.914	4.51113	10	0.92136	1.81232	9	0.9941	2.92731e-49	0.101462
ebi-a-GCST90027459	36	0.695	0.7058	0.12556-3.9674	0.413	1.33827	0.66651-2.68710	0.442	0.82669	0.50906-1.34249	0.527	1.63216	0.36324-7.33389	0.258	2.04171	0.60489-6.89151	0.01597	0.85278	0.815	27.618	35	0.80841	27.583	34	0.77369	1.01978e-166	0.092268
ebi-a-GCST90027745	13	0.274	0.25986	0.02621-2.5764	0.089	2.65114	0.86192-8.15459	0.444	1.38178	0.60394-3.16145	0.269	2.89483	0.47994-17.46057	0.249	2.85469	0.52365-15.56225	0.20131	0.15406	0.811	8.01976	12	0.78358	5.67645	11	0.89406	1.01356e-57	0.123311
ebi-a-GCST90027684	13	0.274	0.25997	0.02623-2.5760	0.089	2.65103	0.86184-8.15459	0.444	1.38171	0.60390-3.16135	0.269	2.89148	0.47945-17.43810	0.249	2.85141	0.52339-15.53432	0.20126	0.15405	0.81	8.01996	12	0.78357	5.6766	11	0.89405	1.02062e-57	0.12328
ebi-a-GCST90027608	25	0.117	0.01647	0.00012-2.3011	0.679	1.18875	0.52354-2.69920	0.447	0.77702	0.40547-1.48905	0.7	1.36873	0.28230-6.63634	0.685	1.36873	0.30608-6.12079	0.31594	0.13656	1	7.15028	24	0.99965	4.77051	23	0.99998	1.16976e-112	0.0973484
ebi-a-GCST90027543	22	0.573	2.58724	0.10033-66.7202	0.943	1.03044	0.45567-2.33021	0.449	1.2765	0.67832-2.40217	0.777	1.27461	0.24247-6.70024	0.751	1.31282	0.24982-6.89879	-0.07536	0.66867	0.875	13.8088	21	0.87767	13.6201	20	0.84922	1.53695e-102	0.117803
ebi-a-GCST90027787	41	0.368	0.3291	0.03012-3.5958	0.254	1.25205	0.85095-1.84221	0.458	1.11779	0.83309-1.49979	0.518	1.26314	0.62556-2.55055	0.549	1.26314	0.59256-2.69261	0.175	0.31876	1	13.6334	40	0.99997	12.6134	39	0.99998	9.3778e-201	0.0726574
ebi-a-GCST90027483	13	0.73	3.89736	0.00211-7205.7246	0.294	1.94899	0.55996-6.78359	0.467	1.39863	0.56593-3.45655	0.471	2.1064	0.29652-14.96310	0.454	2.13935	0.31121-14.70653	-0.08644	0.79293	0.647	9.7142	12	0.64102	9.64186	11	0.56286	6.53287e-59	0.132117
ebi-a-GCST90027794	13	0.615	0.38972	0.01100-13.8056	0.908	0.93429	0.29354-2.97369	0.473	1.35665	0.58976-3.12079	0.567	0.55157	0.07626-3.98931	0.589	0.56053	0.07280-4.31592	0.12275	0.49558	0.733	8.89377	12	0.71198	8.39702	11	0.67736	6.57561e-57	0.112991
ebi-a-GCST90027682	55	0.078	0.08548	0.00587-1.2449	0.255	0.68282	0.35402-1.31700	0.475	1.17651	0.75318-1.83779	0.507	0.55779	0.10064-3.09142	0.468	0.55779	0.11662-2.66786	0.22225	0.05699	0.546	52.3473	54	0.53837	48.561	53	0.64749	2.60666e-270	0.119494
ebi-a-GCST90027786	25	0.285	0.36524	0.06015-2.2178	0.882	0.9671	0.62163-1.50455	0.496	1.1349	0.78870-1.63306	0.575	0.7405	0.26288-2.08587	0.613	0.75697	0.26125-2.19336	0.24193	0.22129	0.034	39.0898	24	0.02672	36.5762	23	0.03599	5.12722e-111	0.0674952
ebi-a-GCST90027783	24	0.807	1.49089	0.06271-35.4472	0.321	1.20911	0.83108-1.75911	0.496	0.90327	0.67410-1.21037	0.568	1.22796	0.61302-2.45975	0.572	1.22796	0.60894-2.47623	-0.11592	0.75851	0.972	11.6053	23	0.97612	11.5084	22	0.96672	5.07122e-111	0.058684
ebi-a-GCST90027756	11	0.487	0.45579	0.05431-3.8251	0.581	1.16582	0.67626-2.00979	0.498	0.86083	0.55790-1.32825	0.683	1.205	0.50517-2.87431	0.634	1.21264	0.56193-2.61686	0.16486	0.56374	0.316	11.8319	10	0.29646	11.3778	9	0.2507	8.1288e-49	0.0580974
ebi-a-GCST90027820	20	0.781	1.43564	0.11593-17.7786	0.862	1.07383	0.48004-2.40211	0.498	0.80115	0.42169-1.52208	0.697	1.33137	0.32186-5.50721	0.72	1.33137	0.28524-6.21432	-0.07214	0.64408	0.997	5.75208	19	0.99845	5.53129	18	0.99776	5.23706e-90	0.0799942
ebi-a-GCST90027473	27	0.065	0.10422	0.01049-1.0359	0.139	1.83864	0.81985-4.12344	0.503	1.23267	0.66858-2.27271	0.414	1.87868	0.42362-8.33167	0.394	1.87868	0.45075-7.83008	0.23734	0.03827	0.997	10.0944	26	0.99781	5.30941	25	0.99999	1.25096e-136	0.11259
ebi-a-GCST90027576	26	0.925	0.84895	0.02890-24.9402	0.196	1.72039	0.75615-3.91423	0.519	1.22005	0.66658-2.23307	0.196	2.88677	0.60377-13.80240	0.181	2.88677	0.63719-13.07851	0.03807	0.83257	0.682	20.8741	25	0.69961	20.8284	24	0.64883	8.56234e-118	0.0990741
ebi-a-GCST90027695	20	0.404	3.19391	0.22310-45.7236	0.359	0.6617	0.27369-1.59975	0.523	0.79848	0.40047-1.59209	0.511	0.56212	0.10439-3.02684	0.504	0.58055	0.12120-2.78082	-0.17624	0.30445	0.895	11.6262	19	0.90098	10.5087	18	0.91403	9.71867e-91	0.0814382
ebi-a-GCST90027843	17	0.307	0.18727	0.00838-4.1872	0.604	0.79792	0.33992-1.87302	0.532	1.23635	0.63591-2.40373	0.752	0.77	0.15638-3.79131	0.741	0.77	0.16805-3.52811	0.29844	0.24176	0.982	7.12144	16	0.97085	5.63609	15	0.98523	3.56048e-76	0.0862395
ebi-a-GCST90027616	29	0	0.00713	0.00068-0.0742	0.054	0.3374	0.11183-1.01798	0.535	0.73069	0.27111-1.96936	0.219	0.08239	0.00168-4.03191	0.083	0.07771	0.00477-1.26480	0.5794	0.00033	<0.001	76.0905	28	0	46.7722	27	0.01049	4.97055e-147	0.145555
ebi-a-GCST90027699	59	0.997	1.00591	0.05077-19.9301	0.214	1.28471	0.86565-1.90664	0.536	1.10392	0.80724-1.50962	0.573	1.28763	0.53712-3.08683	0.604	1.28763	0.49778-3.33079	0.0101	0.95129	1	8.58561	58	1	8.58184	57	1	1.69293e-298	0.0751146
ebi-a-GCST90027674	75	0.519	2.30294	0.18484-28.6922	0.339	1.26912	0.77887-2.06795	0.546	0.89425	0.62207-1.28551	0.579	1.35397	0.46661-3.92884	0.593	1.35397	0.44772-4.09457	-0.08967	0.46001	1	29.4243	74	1	28.8726	73	1	0	0.0854967
ebi-a-GCST90027782	27	0.941	1.03875	0.38384-2.8110	0.497	1.13052	0.79336-1.61096	0.55	1.08247	0.83501-1.40327	0.69	1.16103	0.56165-2.40005	0.286	0.66141	0.31426-1.39206	0.01059	0.93366	0.994	11.7777	26	0.99236	11.7707	25	0.98832	7.6447e-123	0.0569442
ebi-a-GCST90027677	18	0.002	1358.99	29.41197-62792.6870	0.051	0.35099	0.12270-1.00402	0.552	1.37083	0.48474-3.87663	0.115	0.26483	0.05525-1.26947	0.098	0.26483	0.05978-1.17314	-0.92498	0.00237	0.001	40.899	17	0.00096	22.5605	16	0.126	1.55201e-76	0.146169
ebi-a-GCST90027741	18	0.002	1371.61	29.49710-63779.8737	0.05	0.35036	0.12254-1.00172	0.553	1.37005	0.48449-3.87426	0.116	0.26495	0.05497-1.27697	0.097	0.26495	0.06011-1.16787	-0.9263	0.00237	0.001	40.9019	17	0.00096	22.5683	16	0.12577	1.52736e-76	0.145761
ebi-a-GCST90027655	18	0.002	1371.32	29.44419-63867.3062	0.05	0.35031	0.12253-1.00154	0.553	1.36993	0.48440-3.87434	0.116	0.26498	0.05494-1.27797	0.097	0.26498	0.06028-1.16484	-0.9262	0.00238	0.001	40.9025	17	0.00096	22.5775	16	0.1255	1.58023e-76	0.145683
ebi-a-GCST90027795	10	0.7	2.97047	0.01425-619.0780	0.646	1.17992	0.58185-2.39272	0.558	1.18898	0.66619-2.12202	0.836	1.12881	0.37144-3.43047	0.829	1.12881	0.38743-3.28885	-0.23445	0.74399	1	0.64165	9	0.99991	0.52734	8	0.99984	1.244e-48	0.0642992
ebi-a-GCST90027625	85	0.134	9.98822	0.50519-197.4791	0.077	0.63005	0.37786-1.05058	0.558	1.11188	0.77963-1.58573	0.127	0.37142	0.10550-1.30760	0.095	0.37142	0.11784-1.17069	-0.18019	0.15022	0.977	60.9123	84	0.97284	58.8034	83	0.97965	0	0.0928295
ebi-a-GCST90027676	17	0.502	4.53178	0.06110-336.1414	0.385	0.61777	0.20851-1.83034	0.565	0.78654	0.34684-1.78363	0.414	0.45733	0.07362-2.84082	0.41	0.4636	0.07824-2.74691	-0.16532	0.42957	0.987	6.51426	16	0.98153	5.85515	15	0.98208	8.73409e-76	0.0792747
ebi-a-GCST90027522	45	0.908	0.83915	0.04397-16.0162	0.877	0.9534	0.52213-1.74089	0.567	1.1465	0.71756-1.83185	0.917	0.93626	0.27349-3.20513	0.92	0.93626	0.25890-3.38578	0.02661	0.83459	1	7.13777	44	1	7.09363	43	1	2.23708e-213	0.0870273
ebi-a-GCST90027523	5	0.862	0.71855	0.02356-21.9126	0.591	1.37093	0.43341-4.33647	0.567	1.29358	0.53527-3.12618	0.411	2.07197	0.43682-9.82794	0.443	2.09258	0.38091-11.49596	0.09984	0.75013	0.655	2.59247	4	0.62816	2.47066	3	0.48062	6.1961e-24	0.0669703
ebi-a-GCST90027667	50	0	0.03765	0.00769-0.1844	0.034	1.99583	1.05528-3.77469	0.573	1.13923	0.72403-1.79254	0.362	1.99313	0.45934-8.64845	0.392	1.99313	0.41710-9.52425	0.34742	6e-05	0.988	29.7004	49	0.98671	10.4342	48	1	2.10275e-248	0.0891727
ebi-a-GCST90027515	32	0.922	1.14247	0.08081-16.1519	0.966	1.0126	0.57391-1.78661	0.576	0.88401	0.57356-1.36249	1	1.00018	0.34455-2.90341	1	1.00018	0.35795-2.79474	-0.03697	0.84875	1	6.48875	31	1	6.45175	30	1	6.36291e-157	0.0672652
ebi-a-GCST90027460	55	0.18	0.16473	0.01218-2.2282	0.088	1.69174	0.92556-3.09215	0.583	1.13253	0.72662-1.76519	0.396	1.90877	0.43373-8.40017	0.31	1.90877	0.55488-6.56613	0.20784	0.14686	0.999	23.5257	54	0.9999	21.358	53	0.99997	8.00893e-280	0.0893015
ebi-a-GCST90027833	39	0	468.896	145.88391-1507.1097	0.002	0.45683	0.27587-0.75651	0.595	0.87166	0.52539-1.44614	0	0.21449	0.10172-0.45229	0	0.21449	0.10597-0.43413	-1.20321	0	<0.001	148.038	38	0	30.9759	37	0.74655	4.43969e-170	0.0747942
ebi-a-GCST90027466	13	0.261	0.15056	0.00658-3.4470	0.29	1.92752	0.57227-6.49229	0.608	1.26454	0.51598-3.09904	0.461	2.01637	0.33112-12.27885	0.457	1.8933	0.37115-9.65813	0.21197	0.19189	0.823	7.60311	12	0.81533	5.66982	11	0.89446	1.87465e-57	0.0844271
ebi-a-GCST90027683	8	0.849	2.39941	0.00043-13438.3343	0.416	1.87798	0.41184-8.56350	0.617	0.71753	0.19509-2.63900	0.393	2.52366	0.34435-18.49556	0.441	2.52366	0.27311-23.31966	-0.10885	0.79048	0.253	9.41961	7	0.22392	9.29998	6	0.1574	2.82598e-36	0.0748797
ebi-a-GCST90027658	8	0.849	2.40786	0.00043-13577.2341	0.415	1.87894	0.41207-8.56763	0.617	0.71758	0.19512-2.63900	0.392	2.52365	0.34465-18.47884	0.442	2.52365	0.27241-23.37919	-0.10916	0.79006	0.253	9.4197	7	0.22391	9.29958	6	0.15742	2.8008e-36	0.0748743
ebi-a-GCST90027744	8	0.849	2.40804	0.00043-13566.1873	0.415	1.87901	0.41210-8.56748	0.617	0.71759	0.19513-2.63894	0.393	2.52341	0.34457-18.48013	0.442	2.52341	0.27250-23.36759	-0.10917	0.79003	0.253	9.41971	7	0.22391	9.29956	6	0.15742	2.78683e-36	0.0748737
ebi-a-GCST90027680	32	0.01	31.6477	2.73560-366.1281	0.367	0.77495	0.44519-1.34897	0.618	1.11707	0.72295-1.72604	0.53	0.65759	0.18037-2.39749	0.506	0.6672	0.20540-2.16726	-0.50541	0.01094	0.11	41.0518	31	0.10699	32.9652	30	0.32406	3.17751e-148	0.0672592
ebi-a-GCST90027837	8	0.204	0.00307	0.00000-8.8258	0.212	0.33187	0.05869-1.87647	0.619	0.64154	0.11129-3.69819	0.44	0.29369	0.01562-5.52207	0.415	0.30899	0.02170-4.40039	0.50959	0.22747	0.063	14.5685	7	0.04195	11.1965	6	0.08249	2.25828e-34	0.0888007
ebi-a-GCST90027725	32	0.01	31.2609	2.68505-363.9579	0.366	0.77453	0.44489-1.34842	0.62	1.11658	0.72242-1.72578	0.524	0.65705	0.18338-2.35418	0.502	0.66667	0.20670-2.15022	-0.50329	0.01139	0.11	41.0548	31	0.10693	33.0473	30	0.32049	7.16492e-148	0.0670759
ebi-a-GCST90027613	32	0.519	2.42796	0.16895-34.8928	0.433	1.39573	0.60683-3.21024	0.62	1.16036	0.64405-2.09056	0.635	1.49065	0.29084-7.64013	0.648	1.49065	0.27327-8.13125	-0.06922	0.58185	0.943	20.2057	31	0.93129	19.8958	30	0.91923	1.14419e-144	0.0813334
ebi-a-GCST90027653	78	0	0.02614	0.00607-0.1125	0.001	0.49233	0.31812-0.76196	0.623	1.0872	0.77897-1.51739	0.048	0.32059	0.10587-0.97075	0.023	0.32059	0.12266-0.83790	0.51476	0	0.005	109.221	77	0.00926	81.319	76	0.31719	0	0.0724247
ebi-a-GCST90027809	32	0.011	29.5311	2.52588-345.2607	0.367	0.77487	0.44508-1.34904	0.623	1.11548	0.72143-1.72475	0.527	0.65893	0.18334-2.36814	0.488	0.65893	0.20555-2.11232	-0.49448	0.01283	0.11	41.0611	31	0.10681	33.289	30	0.31014	1.23707e-147	0.0667269
ebi-a-GCST90027468	12	0.14	0.03027	0.00042-2.1826	0.08	2.06409	0.91723-4.64491	0.623	1.1665	0.63095-2.15662	0.209	2.23419	0.68537-7.28313	0.182	2.23419	0.74017-6.74391	0.53783	0.12231	0.222	13.9632	11	0.23503	10.8671	10	0.36797	2.88503e-55	0.0631844
ebi-a-GCST90027506	72	0.737	1.58223	0.10962-22.8380	0.864	0.9566	0.57505-1.59132	0.632	1.10187	0.74050-1.63958	0.962	0.9695	0.27652-3.39911	0.962	0.9695	0.27367-3.43453	-0.03595	0.78899	1	19.7082	71	1	19.6361	70	1	0	0.0791797
ebi-a-GCST90027514	31	0	1863.94	167.99792-20680.3625	0.213	0.57263	0.23797-1.37794	0.634	0.84495	0.42196-1.69199	0.201	0.1299	0.00608-2.77385	0.202	0.1324	0.00633-2.76976	-1.21552	0	0.002	60.497	30	0.0008	19.4847	29	0.90822	8.41807e-138	0.0788437
ebi-a-GCST90027622	60	0.678	1.48727	0.23009-9.6137	0.44	0.81998	0.49546-1.35707	0.639	0.91051	0.61511-1.34777	0.718	0.81466	0.26903-2.46692	0.715	0.81466	0.27297-2.43124	-0.06567	0.60012	1	10.4755	59	1	10.1977	58	1	0	0.0698898
ebi-a-GCST90027838	27	0.055	11.8082	1.06928-130.4000	0.407	1.4282	0.61533-3.31491	0.64	0.86003	0.45676-1.61935	0.572	1.55512	0.34326-7.04526	0.595	1.55512	0.31176-7.75726	-0.29943	0.03602	0.992	12.186	26	0.99008	7.27527	25	0.99979	6.90288e-122	0.0700078
ebi-a-GCST90027570	20	0.11	0.06569	0.00275-1.5689	0.766	0.85882	0.31558-2.33718	0.647	1.18617	0.57121-2.46319	0.464	0.50481	0.08391-3.03698	0.443	0.49523	0.08547-2.86929	0.29739	0.08284	0.793	13.8802	19	0.79063	10.507	18	0.9141	5.76881e-93	0.077501
ebi-a-GCST90027586	24	0.885	1.22265	0.08191-18.2494	0.186	1.85693	0.74197-4.64730	0.657	1.17136	0.58307-2.35321	0.262	2.90351	0.47170-17.87236	0.262	2.86275	0.47605-17.21516	-0.00508	0.97463	0.98	10.9715	23	0.98348	10.9705	22	0.97517	2.06162e-114	0.0782989
ebi-a-GCST90027609	50	0.523	3.30398	0.08680-125.7610	0.462	0.80228	0.44580-1.44380	0.661	0.90277	0.57189-1.42507	0.73	0.80668	0.23975-2.71422	0.731	0.80668	0.23835-2.73014	-0.10591	0.48464	1	8.39405	49	1	7.89798	48	1	3.38421e-263	0.0695939
ebi-a-GCST90027509	36	0.624	1.65608	0.22414-12.2363	0.284	1.36643	0.77231-2.41761	0.667	1.10169	0.70920-1.71140	0.325	1.80991	0.56482-5.79975	0.304	1.83306	0.58676-5.72652	-0.06086	0.68473	1	12.2176	35	0.99988	12.0499	34	0.99982	6.06949e-171	0.0644652
ebi-a-GCST90027853	84	0.963	0.97988	0.41848-2.2945	0.026	1.32403	1.03484-1.69404	0.667	1.04057	0.86826-1.24707	0.372	1.32698	0.71557-2.46080	0.33	1.32698	0.75316-2.33797	0.01237	0.88769	0.993	54.8129	83	0.99279	54.7929	82	0.99099	0	0.0551702
ebi-a-GCST90027561	16	0.622	2.27496	0.09291-55.7014	0.494	0.72982	0.29611-1.79877	0.67	1.15371	0.59804-2.22567	0.395	0.5117	0.11431-2.29055	0.4	0.52493	0.12226-2.25382	-0.07916	0.67715	0.617	13.4796	15	0.5653	13.2988	14	0.50314	3.21653e-74	0.0649758
ebi-a-GCST90027656	15	0.089	0.05357	0.00235-1.2208	0.151	0.46034	0.15971-1.32686	0.671	0.8454	0.38914-1.83663	0.309	0.43213	0.09089-2.05451	0.291	0.43715	0.09955-1.91954	0.32886	0.09752	0.651	11.7325	14	0.62777	8.54461	13	0.8064	2.84482e-67	0.0637158
ebi-a-GCST90027742	15	0.09	0.05357	0.00235-1.2213	0.151	0.46033	0.15970-1.32684	0.671	0.84544	0.38915-1.83673	0.309	0.43208	0.09088-2.05429	0.292	0.4371	0.09926-1.92484	0.32886	0.09756	0.651	11.7326	14	0.62776	8.5455	13	0.80634	2.84751e-67	0.0637087
ebi-a-GCST90027584	20	0.755	1.44052	0.15011-13.8242	0.832	1.09024	0.49158-2.41793	0.675	0.88205	0.49009-1.58746	0.846	1.15384	0.27779-4.79260	0.794	1.21182	0.29243-5.02169	-0.06439	0.66473	0.498	18.6115	19	0.482	18.4129	18	0.42878	4.60071e-87	0.0603463
ebi-a-GCST90027771	36	0.043	0.07789	0.00722-0.8407	0.099	0.64649	0.38505-1.08545	0.68	0.90453	0.56185-1.45622	0.252	0.58553	0.23786-1.44137	0.22	0.59513	0.26375-1.34286	0.42157	0.04728	0.014	57.7228	35	0.00916	51.3265	34	0.02865	4.80849e-175	0.0634795
ebi-a-GCST90027678	29	0.893	1.33058	0.02162-81.8880	0.778	1.07627	0.64620-1.79258	0.689	0.92428	0.62846-1.35934	0.889	1.07237	0.40678-2.82700	0.883	1.07237	0.42668-2.69518	-0.04936	0.86308	0.995	11.8081	28	0.99684	11.7778	27	0.9951	7.16834e-131	0.056212
ebi-a-GCST90027524	23	0.117	0.14951	0.01532-1.4588	0.543	0.76188	0.31729-1.82943	0.689	0.87519	0.45508-1.68313	0.557	0.60703	0.11767-3.13158	0.524	0.60703	0.13405-2.74889	0.20704	0.12741	0.706	17.9282	22	0.71024	15.409	21	0.80188	2.22246e-112	0.0647999
ebi-a-GCST90027642	109	0.88	1.16863	0.15452-8.8381	0.969	0.9922	0.66693-1.47612	0.693	0.93787	0.68178-1.29017	0.978	1.01427	0.37844-2.71838	0.977	1.01427	0.39171-2.62628	-0.01789	0.82956	1	13.8584	108	1	13.8118	107	1	0	0.0659509
ebi-a-GCST90027447	27	0.59	1.8858	0.19325-18.4019	0.048	0.42894	0.18543-0.99223	0.698	0.87005	0.43062-1.75787	0.237	0.36464	0.07115-1.86875	0.186	0.34654	0.07508-1.59936	-0.07907	0.49011	0.181	32.3416	26	0.18207	31.7191	25	0.1663	2.11676e-125	0.068092
ebi-a-GCST90027826	63	0.162	1.54639	0.84612-2.8262	0.238	1.16869	0.90233-1.51367	0.713	0.96687	0.80797-1.15701	0.476	1.23201	0.69672-2.17859	0.357	1.2643	0.77065-2.07416	-0.1135	0.11501	0.512	60.9008	62	0.51567	58.3443	61	0.57276	0	0.0527801
ebi-a-GCST90027668	50	0.001	32.1854	5.09813-203.1926	0.016	0.41738	0.20521-0.84891	0.723	1.10379	0.63924-1.90593	0.102	0.32321	0.08552-1.22154	0.126	0.32926	0.08119-1.33530	-0.34991	0.00052	0.086	62.4816	49	0.09345	48.5027	48	0.45257	3.44257e-244	0.0716128
ebi-a-GCST90027632	13	0.324	0.08774	0.00087-8.8569	0.44	0.65643	0.22576-1.90873	0.723	1.17634	0.47900-2.88885	0.586	0.64161	0.13548-3.03865	0.599	0.65258	0.13874-3.06945	0.30042	0.28512	0.119	18.4493	12	0.10271	16.55	11	0.12191	9.57556e-57	0.0653208
ebi-a-GCST90027631	29	0.189	0.10321	0.00380-2.8049	0.212	0.56252	0.22794-1.38818	0.724	0.88311	0.44285-1.76104	0.124	0.23145	0.03801-1.40946	0.114	0.23697	0.04204-1.33566	0.21992	0.20387	0.183	34.6385	28	0.18064	32.5918	27	0.21087	1.91408e-129	0.065083
ebi-a-GCST90027825	16	0.065	5.37284	1.03981-27.7622	0.304	1.39834	0.73806-2.64930	0.733	1.08861	0.66814-1.77368	0.299	1.87505	0.59645-5.89459	0.307	1.81944	0.59958-5.52108	-0.26328	0.06583	0.936	8.3095	15	0.91078	4.32765	14	0.99315	1.08373e-72	0.0547975
ebi-a-GCST90027554	26	0.002	0.00536	0.00026-0.1089	0.004	3.76608	1.54609-9.17366	0.74	1.12645	0.55769-2.27526	0.17	4.01246	0.58477-27.53177	0.157	4.01246	0.62074-25.93655	0.48948	0.00157	0.228	29.4715	25	0.24469	16.7698	24	0.85831	2.83653e-120	0.0664124
ebi-a-GCST90027542	31	0.099	14.278	0.67034-304.1145	0.678	1.18779	0.52752-2.67447	0.742	1.10619	0.60723-2.01513	0.7	1.37601	0.27500-6.88501	0.63	1.45429	0.32172-6.57398	-0.24513	0.10538	0.904	20.2496	30	0.90988	17.4557	29	0.95462	6.99215e-148	0.0638983
ebi-a-GCST90027592	125	0	79.3015	17.57728-357.7757	0.115	0.70267	0.45327-1.08930	0.753	0.95126	0.69679-1.29865	0.406	0.5917	0.17254-2.02915	0.365	0.5917	0.19101-1.83296	-0.41323	0	0.974	95.4315	124	0.97335	60.8445	123	1	0	0.0614581
ebi-a-GCST90027855	61	0.921	1.08558	0.21411-5.5041	0.805	1.05787	0.67699-1.65304	0.762	1.05844	0.73299-1.52838	0.973	1.01879	0.35254-2.94414	0.972	1.01879	0.35618-2.91409	-0.00259	0.97507	1	17.6827	60	1	17.6817	59	1	1.61714e-294	0.0578352
ebi-a-GCST90027538	87	0.132	1.50104	0.88944-2.5332	0.015	1.3107	1.05371-1.63036	0.764	0.9746	0.82394-1.15281	0.198	1.4447	0.82849-2.51923	0.183	1.4447	0.84382-2.47349	-0.11789	0.09131	1	40.626	86	0.99999	37.7092	85	1	0	0.0523523
ebi-a-GCST90027546	61	0.226	3.93998	0.43823-35.4227	0.162	0.69203	0.41290-1.15986	0.765	0.93892	0.62063-1.42044	0.49	0.65079	0.19358-2.18785	0.47	0.64499	0.19760-2.10530	-0.13988	0.19752	1	9.46745	60	1	7.76876	59	1	0	0.0592359
ebi-a-GCST90027531	13	0.714	1.97511	0.05717-68.2350	0.884	1.09957	0.30841-3.92022	0.773	0.87141	0.34237-2.21797	0.983	0.978	0.12767-7.49173	0.952	0.93768	0.12182-7.21737	-0.08933	0.64712	0.45	12.0629	12	0.44064	11.8248	11	0.37696	2.34875e-60	0.0585134
ebi-a-GCST90027500	30	0.045	12.1252	1.17356-125.2769	0.944	1.01502	0.67095-1.53555	0.776	1.04924	0.75319-1.46165	0.946	1.03507	0.38557-2.77867	0.891	1.06957	0.41234-2.77439	-0.50335	0.04751	0.073	40.8053	29	0.07161	35.3768	28	0.15916	7.7262e-135	0.0527737
ebi-a-GCST90027730	11	0.97	0.91545	0.01104-75.8952	0.966	0.97337	0.28451-3.33016	0.783	0.87246	0.33051-2.30305	0.968	0.96234	0.15766-5.87380	0.947	0.93786	0.14782-5.95047	-0.00441	0.98302	0.999	1.65095	10	0.99838	1.65048	9	0.99587	5.15156e-50	0.0567085
ebi-a-GCST90027661	38	0	239.582	37.76163-1520.0473	0.003	1.74346	1.20849-2.51526	0.784	1.04634	0.75699-1.44628	0.051	1.78148	1.01666-3.12166	0.043	1.78148	1.03734-3.05943	-1.16484	0	0.023	57.104	37	0.01847	23.2044	36	0.95104	2.98409e-166	0.0530101
ebi-a-GCST90027701	51	0.001	31.0659	4.99829-193.0832	0.011	0.41769	0.21232-0.82168	0.785	1.07746	0.62997-1.84282	0.092	0.32733	0.09172-1.16811	0.129	0.33345	0.08264-1.34551	-0.34835	0.00049	0.114	62.9048	50	0.104	48.9426	49	0.47543	6.07183e-250	0.0622289
ebi-a-GCST90027687	39	0	98.082	17.86334-538.5370	0.002	1.74657	1.22728-2.48558	0.793	1.04338	0.76005-1.43234	0.072	1.78743	0.96572-3.30831	0.046	1.78743	1.03059-3.10007	-0.96103	1e-05	0.025	57.1194	38	0.02387	29.1346	37	0.81846	1.41563e-172	0.0527294
ebi-a-GCST90027456	5	0.134	0.00177	0.00000-0.7767	0.611	1.65776	0.23668-11.61123	0.801	1.26685	0.20163-7.95968	0.427	4.74851	0.14981-150.51319	0.388	5.35633	0.17820-160.99881	0.87977	0.11849	0.125	8.37727	4	0.0787	3.26067	3	0.35315	5.00944e-27	0.0663458
ebi-a-GCST90027499	19	0.783	0.72949	0.08017-6.6377	0.763	1.11913	0.53788-2.32849	0.802	0.93482	0.55182-1.58368	0.79	1.18767	0.34096-4.13705	0.787	1.18767	0.34733-4.06117	0.03705	0.82337	0.833	12.7707	18	0.80501	12.7193	17	0.75476	9.28376e-85	0.0530368
ebi-a-GCST90027463	47	0.471	3.38213	0.12673-90.2593	0.426	1.12369	0.84343-1.49708	0.804	1.02873	0.82276-1.28627	0.326	1.34159	0.75090-2.39692	0.337	1.34159	0.74073-2.42984	-0.26909	0.48017	1	6.44326	46	1	5.93639	45	1	1.03266e-260	0.0516748
ebi-a-GCST90027450	31	0	0.00218	0.00011-0.0437	0.735	0.84231	0.31215-2.27293	0.805	0.90303	0.40112-2.03295	0.91	0.86832	0.07765-9.71035	0.885	0.84677	0.09121-7.86137	0.54126	0.00036	0.011	51.8899	30	0.00783	33.2007	29	0.26972	7.12786e-136	0.0609711
ebi-a-GCST90027830	29	0.001	0.00703	0.00057-0.0864	0.953	0.98362	0.56466-1.71341	0.805	1.0532	0.69726-1.59085	0.971	0.98028	0.34109-2.81726	0.957	0.97076	0.33600-2.80469	0.69256	0.00048	0.919	17.7486	28	0.9323	2.00361	27	1	4.15248e-143	0.0533541
ebi-a-GCST90027721	27	0.009	5500.31	14.80645-2043255.2687	0.306	0.73834	0.41322-1.31925	0.806	1.0577	0.67632-1.65415	0.191	2.2005	0.69508-6.96638	0.414	0.61788	0.19809-1.92727	-1.16981	0.00879	0.999	8.58274	26	0.99948	0.50459	25	1	1.7363e-120	0.0533114
ebi-a-GCST90027659	12	0.579	2.98998	0.07093-126.0334	0.996	0.9975	0.33097-3.00636	0.815	1.10917	0.46672-2.63598	0.934	0.92797	0.16527-5.21056	0.932	0.92797	0.17328-4.96954	-0.11273	0.60501	0.995	2.30646	11	0.9971	2.0213	10	0.99617	5.3629e-59	0.0558154
ebi-a-GCST90027781	30	0.154	3.36769	0.66407-17.0785	0.367	0.79146	0.47593-1.31619	0.825	1.04255	0.72065-1.50823	0.173	0.45362	0.14966-1.37495	0.431	0.60535	0.17662-2.07480	-0.21375	0.15717	0.728	23.605	29	0.74816	21.4921	28	0.80425	5.7319e-137	0.0520701
ebi-a-GCST90027545	38	0.859	0.75959	0.03724-15.4921	0.61	1.21048	0.58122-2.52100	0.826	1.06427	0.61033-1.85586	0.795	1.22973	0.26127-5.78814	0.795	1.22973	0.26217-5.76828	0.02979	0.82475	0.994	20.0305	37	0.98966	19.9807	36	0.98585	5.36733e-173	0.0558623
ebi-a-GCST90027569	12	0.903	0.68893	0.00198-239.4997	0.395	1.68475	0.50623-5.60691	0.826	1.11741	0.41479-3.01023	0.493	2.08148	0.27411-15.80585	0.469	2.10216	0.30152-14.65615	0.04223	0.87271	0.988	2.92669	11	0.99166	2.89967	10	0.98369	7.15956e-55	0.0562778
ebi-a-GCST90027476	40	0.632	1.5748	0.24907-9.9571	0.514	0.78231	0.37427-1.63520	0.833	0.9437	0.55107-1.61605	0.352	0.46885	0.09700-2.26626	0.347	0.46885	0.09850-2.23167	-0.05071	0.57271	1	16.067	39	0.99957	15.7433	38	0.99946	1.44881e-185	0.0547781
ebi-a-GCST90027706	44	0.073	7.92063	0.87084-72.0412	0.083	0.67401	0.43150-1.05284	0.841	0.96498	0.68101-1.36735	0.414	0.66661	0.25448-1.74617	0.442	0.66661	0.23959-1.85469	-0.25192	0.06532	1	12.4342	43	1	8.85226	42	1	2.39737e-209	0.0520541
ebi-a-GCST90027598	12	0.103	53.2555	0.68797-4122.5067	0.285	2.1465	0.52967-8.69875	0.842	1.13091	0.33610-3.80527	0.247	4.24041	0.41926-42.88822	0.211	4.1429	0.50737-33.82890	-0.41319	0.10287	0.124	16.495	11	0.12373	12.4751	10	0.25452	3.70188e-55	0.0581488
ebi-a-GCST90027708	26	0.494	0.37688	0.02407-5.9005	0.8	0.89887	0.39363-2.05261	0.85	1.06325	0.56224-2.01071	0.392	0.45937	0.07991-2.64090	0.396	0.46734	0.08324-2.62389	0.10935	0.45487	0.932	15.0886	25	0.93929	14.5116	24	0.93424	1.66695e-117	0.0539255
ebi-a-GCST90027692	10	0.24	3.45811	0.50900-23.4940	0.517	1.18628	0.70772-1.98844	0.885	0.971	0.65235-1.44529	0.595	1.29265	0.51820-3.22456	0.587	1.29265	0.52869-3.16056	-0.32587	0.22074	0.712	6.1481	9	0.72501	4.38388	8	0.82093	4.8593e-45	0.0503175
ebi-a-GCST90027610	7	0.453	8.20506	0.05162-1304.2836	0.653	1.43047	0.30103-6.79736	0.886	0.92112	0.29886-2.83896	0.504	2.40433	0.21348-27.07899	0.496	2.32476	0.23666-22.83664	-0.22948	0.42543	0.525	5.06162	6	0.53593	4.30938	5	0.50579	1.41191e-32	0.0516884
ebi-a-GCST90027761	10	0.241	3.39162	0.51297-22.4245	0.516	1.18641	0.70824-1.98741	0.887	0.9717	0.65298-1.44599	0.601	1.28603	0.51821-3.19154	0.594	1.28603	0.52639-3.14189	-0.3211	0.22119	0.712	6.1491	9	0.72491	4.38865	8	0.82047	4.83936e-45	0.0503022
ebi-a-GCST90027581	51	0.156	21.5768	0.33207-1402.0022	0.53	0.80841	0.41634-1.56967	0.888	1.03503	0.64160-1.66972	0.905	1.08732	0.27888-4.23935	0.89	1.10886	0.25759-4.77336	-0.23845	0.15746	0.893	37.1528	50	0.91095	35.0918	49	0.93271	1.00542e-241	0.0523846
ebi-a-GCST90027766	34	0.395	0.43968	0.06780-2.8513	0.058	0.50647	0.25033-1.02468	0.89	1.04243	0.57850-1.87840	0.151	0.43452	0.14293-1.32095	0.167	0.45004	0.14866-1.36245	0.09345	0.34736	0.062	46.4865	33	0.05988	45.2016	32	0.06095	5.56325e-164	0.0524754
ebi-a-GCST90027539	51	0.158	0.11398	0.00585-2.2187	0.023	2.09371	1.10763-3.95764	0.89	0.96789	0.60835-1.53993	0.174	2.5426	0.67527-9.57374	0.17	2.5426	0.68441-9.44578	0.18014	0.15909	0.81	40.1169	50	0.83995	38.0723	49	0.87073	1.28592e-248	0.0520567
ebi-a-GCST90027448	7	0.903	9480.29	0.00000-79105526612819000000000000000000000000000000000000000000000000000.0000	0.878	0.955	0.53022-1.72008	0.906	0.97196	0.60739-1.55534	0.91	0.9549	0.44394-2.05392	0.905	0.9549	0.46223-1.97265	-3.70993	0.90288	1	0.02613	6	1	0.00966	5	1	1.40043e-31	0.0501976
ebi-a-GCST90027487	62	0.61	0.58102	0.07297-4.6262	0.826	1.03147	0.78215-1.36026	0.921	0.98904	0.79584-1.22914	0.342	1.36858	0.71997-2.60151	0.338	1.35515	0.73117-2.51163	0.11171	0.61519	1	30.5855	61	0.99961	30.3301	60	0.9995	0	0.0503142
ebi-a-GCST90027851	11	0.392	0.32471	0.02792-3.7761	0.955	0.98516	0.58323-1.66408	0.935	0.98407	0.66847-1.44867	0.871	0.93247	0.41068-2.11720	0.878	0.93247	0.39114-2.22300	0.25377	0.3931	0.669	7.46788	10	0.68066	6.66334	9	0.67212	2.09957e-47	0.0501012
ebi-a-GCST90027594	102	0.394	0.35678	0.03374-3.7727	0.014	0.58448	0.38141-0.89568	0.936	1.01319	0.73480-1.39704	0.332	0.58386	0.19810-1.72084	0.306	0.58386	0.20939-1.62799	0.09444	0.38336	1	59.2167	101	0.9997	58.4501	100	0.99971	0	0.050757
ebi-a-GCST90027789	50	0.149	3.28953	0.67097-16.1274	0.13	0.72369	0.47631-1.09955	0.944	1.01174	0.73178-1.39879	0.425	0.68458	0.27175-1.72455	0.419	0.67864	0.26728-1.72312	-0.14755	0.14413	1	17.3973	49	0.99999	15.1927	48	1	8.20027e-240	0.0502618
ebi-a-GCST90027471	49	0.508	0.38283	0.02275-6.4413	0.392	0.7584	0.40242-1.42928	0.957	0.98733	0.61806-1.57723	0.555	0.69459	0.20876-2.31103	0.58	0.69459	0.19268-2.50390	0.07888	0.508	1	22.8904	48	0.99921	22.4454	47	0.99909	3.46843e-247	0.0503148
ebi-a-GCST90027840	216	0	0.03843	0.01353-0.1092	0.017	1.35615	1.05657-1.74068	0.966	1.00412	0.82922-1.21592	0.211	1.60085	0.76763-3.33845	0.218	1.60085	0.75888-3.37696	0.33041	0	1	62.2524	215	1	23.4228	214	1	0	0.0501489
ebi-a-GCST90027590	75	0	6.27744	2.34875-16.7776	0.026	1.34679	1.03611-1.75063	0.968	0.99617	0.82655-1.20058	0.075	1.7863	0.95114-3.35479	0.086	1.74262	0.93145-3.26021	-0.32933	0.00037	0.725	67.266	74	0.69708	53.2929	73	0.95992	0	0.0500427
ebi-a-GCST90027528	13	0.149	39.1436	0.38259-4004.8875	0.623	1.347	0.41077-4.41715	0.968	0.98145	0.39047-2.46688	0.552	1.96426	0.22588-17.08116	0.502	1.98923	0.28369-13.94866	-0.34086	0.13948	0.978	4.61003	12	0.96975	2.07259	11	0.99822	1.35294e-58	0.0501678
ebi-a-GCST90027614	18	0.249	7.16622	0.28377-180.9715	0.853	1.10492	0.38345-3.18382	0.971	1.0148	0.46520-2.21372	0.75	1.34147	0.22619-7.95579	0.717	1.39826	0.23574-8.29360	-0.17678	0.23914	0.756	12.6624	17	0.75847	11.1674	16	0.79904	9.10993e-83	0.0501528
ebi-a-GCST90027643	4	0.502	0	0.00000-12465261178.5558	0.646	1.57815	0.22526-11.05629	0.98	0.9794	0.19834-4.83613	0.569	2.47155	0.15259-40.03176	0.59	2.44438	0.13308-44.89840	1.3387	0.5018	0.569	2.12733	3	0.5464	1.46703	2	0.48022	6.96965e-20	0.0500677
ebi-a-GCST90027618	47	0.38	0.18448	0.00440-7.7343	0.122	0.5846	0.29611-1.15414	0.987	0.99586	0.59866-1.65661	0.33	0.4807	0.11189-2.06515	0.317	0.47381	0.11130-2.01706	0.15476	0.37666	1	19.0069	46	0.99985	18.2097	45	0.99987	1.17789e-221	0.0500304
ebi-a-GCST90027698	32	0.029	34.1297	1.66017-701.6353	0.752	0.87842	0.39298-1.96348	0.988	0.9955	0.56355-1.75851	0.822	0.83765	0.18211-3.85303	0.819	0.83765	0.18553-3.78196	-0.3345	0.02653	0.821	23.8977	31	0.8147	18.4536	30	0.95072	6.43037e-145	0.0500244
ebi-a-GCST90027779	35	0.002	40.2973	4.59709-353.2398	0.231	0.63914	0.30735-1.32913	0.99	0.9967	0.59013-1.68339	0.294	0.41778	0.08383-2.08202	0.313	0.41778	0.07868-2.21835	-0.3832	0.00159	0.868	25.2166	34	0.86235	13.3688	33	0.99905	9.63603e-163	0.0500146
ebi-a-GCST90027611	21	0.176	5.99752	0.49270-73.0071	0.126	0.44463	0.15752-1.25505	0.997	1.00134	0.48041-2.08713	0.245	0.353	0.06417-1.94180	0.275	0.35759	0.05937-2.15372	-0.16865	0.15829	0.819	13.9503	20	0.83301	11.7933	19	0.89427	2.27404e-92	0.0500014

## Sheet: Sheet1
		OR小于1		ebi-a-GCST90027615		ebi-a-GCST90027503	OR大于1	ebi-a-GCST90027463		ebi-a-GCST90027455
				ebi-a-GCST90027691		ebi-a-GCST90027454		ebi-a-GCST90027487		ebi-a-GCST90027568
				ebi-a-GCST90027503		ebi-a-GCST90027857		ebi-a-GCST90027644
				ebi-a-GCST90027449		ebi-a-GCST90027612		ebi-a-GCST90027520
				ebi-a-GCST90027737				ebi-a-GCST90027637
				ebi-a-GCST90027663				ebi-a-GCST90027836
				ebi-a-GCST90027848				ebi-a-GCST90027465
				ebi-a-GCST90027454				ebi-a-GCST90027689
				ebi-a-GCST90027845				ebi-a-GCST90027620
				ebi-a-GCST90027759				ebi-a-GCST90027494
				ebi-a-GCST90027690				ebi-a-GCST90027758
				ebi-a-GCST90027527				ebi-a-GCST90027666
				ebi-a-GCST90027805				ebi-a-GCST90027579
				ebi-a-GCST90027560				ebi-a-GCST90027835
				ebi-a-GCST90027573				ebi-a-GCST90027759
				ebi-a-GCST90027857				ebi-a-GCST90027484
				ebi-a-GCST90027767				ebi-a-GCST90027609
				ebi-a-GCST90027549				ebi-a-GCST90027822
				ebi-a-GCST90027601				ebi-a-GCST90027636
				ebi-a-GCST90027612				ebi-a-GCST90027492
				ebi-a-GCST90027567				ebi-a-GCST90027764
				ebi-a-GCST90027636				ebi-a-GCST90027698
				ebi-a-GCST90027852				ebi-a-GCST90027696
				ebi-a-GCST90027675				ebi-a-GCST90027476
				ebi-a-GCST90027760				ebi-a-GCST90027600
				ebi-a-GCST90027714				ebi-a-GCST90027499
				ebi-a-GCST90027796				ebi-a-GCST90027642
				ebi-a-GCST90027508				ebi-a-GCST90027628
				ebi-a-GCST90027729				ebi-a-GCST90027479
				ebi-a-GCST90027630				ebi-a-GCST90027720
				ebi-a-GCST90027491				ebi-a-GCST90027650
				ebi-a-GCST90027842				ebi-a-GCST90027844
				ebi-a-GCST90027709				ebi-a-GCST90027472
				ebi-a-GCST90027823				ebi-a-GCST90027449
				ebi-a-GCST90027612				ebi-a-GCST90027495
				ebi-a-GCST90027486				ebi-a-GCST90027455
				ebi-a-GCST90027506				ebi-a-GCST90027775
				ebi-a-GCST90027536				ebi-a-GCST90027604
				ebi-a-GCST90027802				ebi-a-GCST90027814
				ebi-a-GCST90027473				ebi-a-GCST90027568
				ebi-a-GCST90027857				ebi-a-GCST90027587
				ebi-a-GCST90027565				ebi-a-GCST90027462
				ebi-a-GCST90027551				ebi-a-GCST90027527
				ebi-a-GCST90027847				ebi-a-GCST90027532
				ebi-a-GCST90027454				ebi-a-GCST90027653
				ebi-a-GCST90027498				ebi-a-GCST90027751
				ebi-a-GCST90027569				ebi-a-GCST90027474
				ebi-a-GCST90027723				ebi-a-GCST90027824
				ebi-a-GCST90027485				ebi-a-GCST90027541
				ebi-a-GCST90027469				ebi-a-GCST90027634
				ebi-a-GCST90027707				ebi-a-GCST90027490
				ebi-a-GCST90027452				ebi-a-GCST90027791
				ebi-a-GCST90027521				ebi-a-GCST90027489
				ebi-a-GCST90027504				ebi-a-GCST90027475
				ebi-a-GCST90027554				ebi-a-GCST90027649
				ebi-a-GCST90027625				ebi-a-GCST90027453
				ebi-a-GCST90027673				ebi-a-GCST90027841
				ebi-a-GCST90027639				ebi-a-GCST90027753
				ebi-a-GCST90027480				ebi-a-GCST90027823
				ebi-a-GCST90027586				ebi-a-GCST90027829
				ebi-a-GCST90027757				ebi-a-GCST90027597
				ebi-a-GCST90027477				ebi-a-GCST90027669
				ebi-a-GCST90027783				ebi-a-GCST90027839
				ebi-a-GCST90027457				ebi-a-GCST90027834
				ebi-a-GCST90027776				ebi-a-GCST90027799
				ebi-a-GCST90027754				ebi-a-GCST90027768
				ebi-a-GCST90027546				ebi-a-GCST90027777
				ebi-a-GCST90027781				ebi-a-GCST90027712
				ebi-a-GCST90027769				ebi-a-GCST90027548
				ebi-a-GCST90027618				ebi-a-GCST90027568
				ebi-a-GCST90027574				ebi-a-GCST90027702
				ebi-a-GCST90027589				ebi-a-GCST90027803
				ebi-a-GCST90027539				ebi-a-GCST90027455
				ebi-a-GCST90027602				ebi-a-GCST90027607
				ebi-a-GCST90027503				ebi-a-GCST90027603
				ebi-a-GCST90027460				ebi-a-GCST90027525
				ebi-a-GCST90027815				ebi-a-GCST90027856
				ebi-a-GCST90027555				ebi-a-GCST90027797
				ebi-a-GCST90027613
				ebi-a-GCST90027801
				ebi-a-GCST90027807
				ebi-a-GCST90027482
				ebi-a-GCST90027830
				ebi-a-GCST90027543
